# Supplementary material for: Genome-wide DNA methylation profiling predicts relapse in childhood B-cell acute lymphoblastic leukaemia
Source: PubMed Central journal article supplement (PMC3568176; doi:10.1111/bjh.12113), 2012-10-30
Supplement: bjh0160-0406-sd1.pdf [file bjh0160-0406-sd1.pdf]

## **Supplementary information**

**1. Patients and Methods**

**2. Supplementary Figures**

**3. Supplementary Tables**

## 1. Patients and Methods

### Patient samples

Ficoll-enriched, cryopreserved bone marrow samples from 29 children diagnosed with B-ALL were obtained from the Department of Hematology of the Hospital de Sant Pau (Barcelona, Spain). Twenty-five of the samples were taken at the time of diagnosis, and four were obtained at relapse. All patients (or parents) provided informed consent to use these samples for research studies in accordance with the Declaration of Helsinki. The study was approved by the institutional review board of all participating institutions. Peripheral blood mononuclear cells (PBMCs) from healthy donors were extracted using a Ficoll gradient. To separate CD19-positive cells CD19 MicroBeads (Miltenyi Biotec) were applied following the manufacturer's instructions. DNA was extracted using phenol:chloroform:isoamylalcohol (Sigma).

### Infinium HumanMethylation450 BeadChip

All DNA samples were assessed for integrity, quantity and purity by electrophoresis in a 1.3% agarose gel, picogreen quantification and nanodrop measurement. All samples were randomly distributed into 96 well plates. Bisulfite conversion of 500 ng of genomic DNA was performed using an EZ DNA methylation kit (Zymo Research) following the manufacturer's instructions. 200 ng of bisulfite-converted DNA were used for hybridization on the HumanMethylation450 BeadChip (Illumina). Briefly, samples were whole genome amplified, and then subjected to an enzymatic end-point fragmentation, precipitation and resuspension. The resuspended samples were hybridized onto the BeadChip for 16 hours at 48°C and washed. A single nucleotide extension with labeled dideoxy-nucleotides was performed and repeated rounds of staining were applied with a combination of labeled antibodies differentiating between biotin and DNP. Data were normalized using GenomeStudio V2010.3 (Illumina). The DNA methylation level is displayed as  $\beta$ -values ranging from 0 to 1. We filtered for high signal quality ( $p < 0.01$ ), array probes not containing SNPs (dbSNP) and those located on autosomes. In total, we analyzed 436,346 CpG sites. All the obtained DNA methylation data have been deposited in the Gene Expression Omnibus (GEO) database in the following link:

<http://www.ncbi.nlm.nih.gov/geo/query/acc.cgi?token=bfsbfcigsakcuty&acc=GSE39141>

### Statistical analysis

Gene ontology (GO) analysis was performed using DAVID 6.7 (Huang *et al*, 2009) (National Institute of Allergy and Infectious Diseases (NIAID), NIH). Enriched GO terms

were considered significant for values of FDR below a threshold of 0.05. Differentially methylated CpG sites were selected using a threshold of a 0.3 difference ( $\delta$ ) in average  $\beta$ -values between the groups and a FDR<0.01 (Wilcoxon rank test). All clusters were created within GenomeStudio V2010.3 using the Manhattan method.

B-ALL subgroup specific signatures were confirmed by performing a ten-fold cross-validation, randomly splitting our original sample group into training and test subsets. The model cluster was built on the training subset, using a hierarchical clustering method with a complete link type, and calculating the Euclidean distances between samples. This cluster model was successfully applied to the test subset (AUC: 89.5).

Histone marks and regions occupied by CTCF and H2A.Z were identified using chromatin immunoprecipitation sequencing (ChIP-seq) experiments, enrolled in the ENCODE project processing a lymphoblastoid cell line of a healthy donor (GM12878) (Ernst *et al*, 2011).

Ernst, J., Kheradpour, P., Mikkelsen, T.S., Shores, N., Ward, L.D., Epstein, C.B., Zhang, X., Wang, L., Issner, R., Coyne, M., Ku, M., Durham, T., Kellis, M. & Bernstein, B.E. (2011) Mapping and analysis of chromatin state dynamics in nine human cell types. *Nature*, **473**, 43–49.

Huang, D.W., Sherman, B.T. & Lempicki, R.A. (2009) Systematic and integrative analysis of large gene lists using DAVID bioinformatics resources. *Nature Protocols*, **4**, 44–57.

## 2. Supplementary Figures

**Supplementary figure 1.** DNA methylation level in different genomic features. **(a)** Box plot displaying the distribution of total  $\beta$ -values of NBC and B-ALL samples regarding their functional genomic distribution: promoter, gene body, 3'UTR and intergenic. Significance is indicated. **(b)** Box plot displaying the distribution of total  $\beta$ -values of NBC and B-ALL samples regarding their CpG content: CpG island, shore, shelf and open sea. Significance is indicated.

**Supplementary figure 2.** Differentially methylated CpG site (dmCpG) between B-cell (NBC) and B-ALL (ALL) samples. **(a)** Hierarchical clustering of 4 healthy NBC samples (yellow) and 29 ALL patients (orange) using dmCpGs. **(b)** Genomic distribution of 3,414 differentially methylated CpGs sites, including 3,014 hypomethylated and 400 hypermethylated CpGs sites in B-ALLs compared to NBC regarding functional genomic distribution (promoter, gene body, 3'UTR and intergenic) and CpG content (CpG island, shore, shelf and open sea). **(c)** Up, hierarchical clustering using promoter associated dmCpG sites located in CpG islands and or shores of 4 healthy NBC samples (yellow), 29 ALL patients (orange). Below, average  $\beta$ -values of promoter associated dmCpG sites located in CpG islands or shores of NBC and B-ALL samples. **(d)** Genomic distribution of the 1,068 promoter associated dmCpGs, including 828 hypomethylated and 240 hypermethylated sites in B-ALLs compared to NBC regarding their CpG content (CpG island, shore, shelf and open sea).

**Supplementary figure 3.** Relative number of hyper- and hypomethylated differentially methylated sites between ALL-1 and ALL-2 considering their overlap with loci occupied by different histone marks, H2A.Z and CTCF.

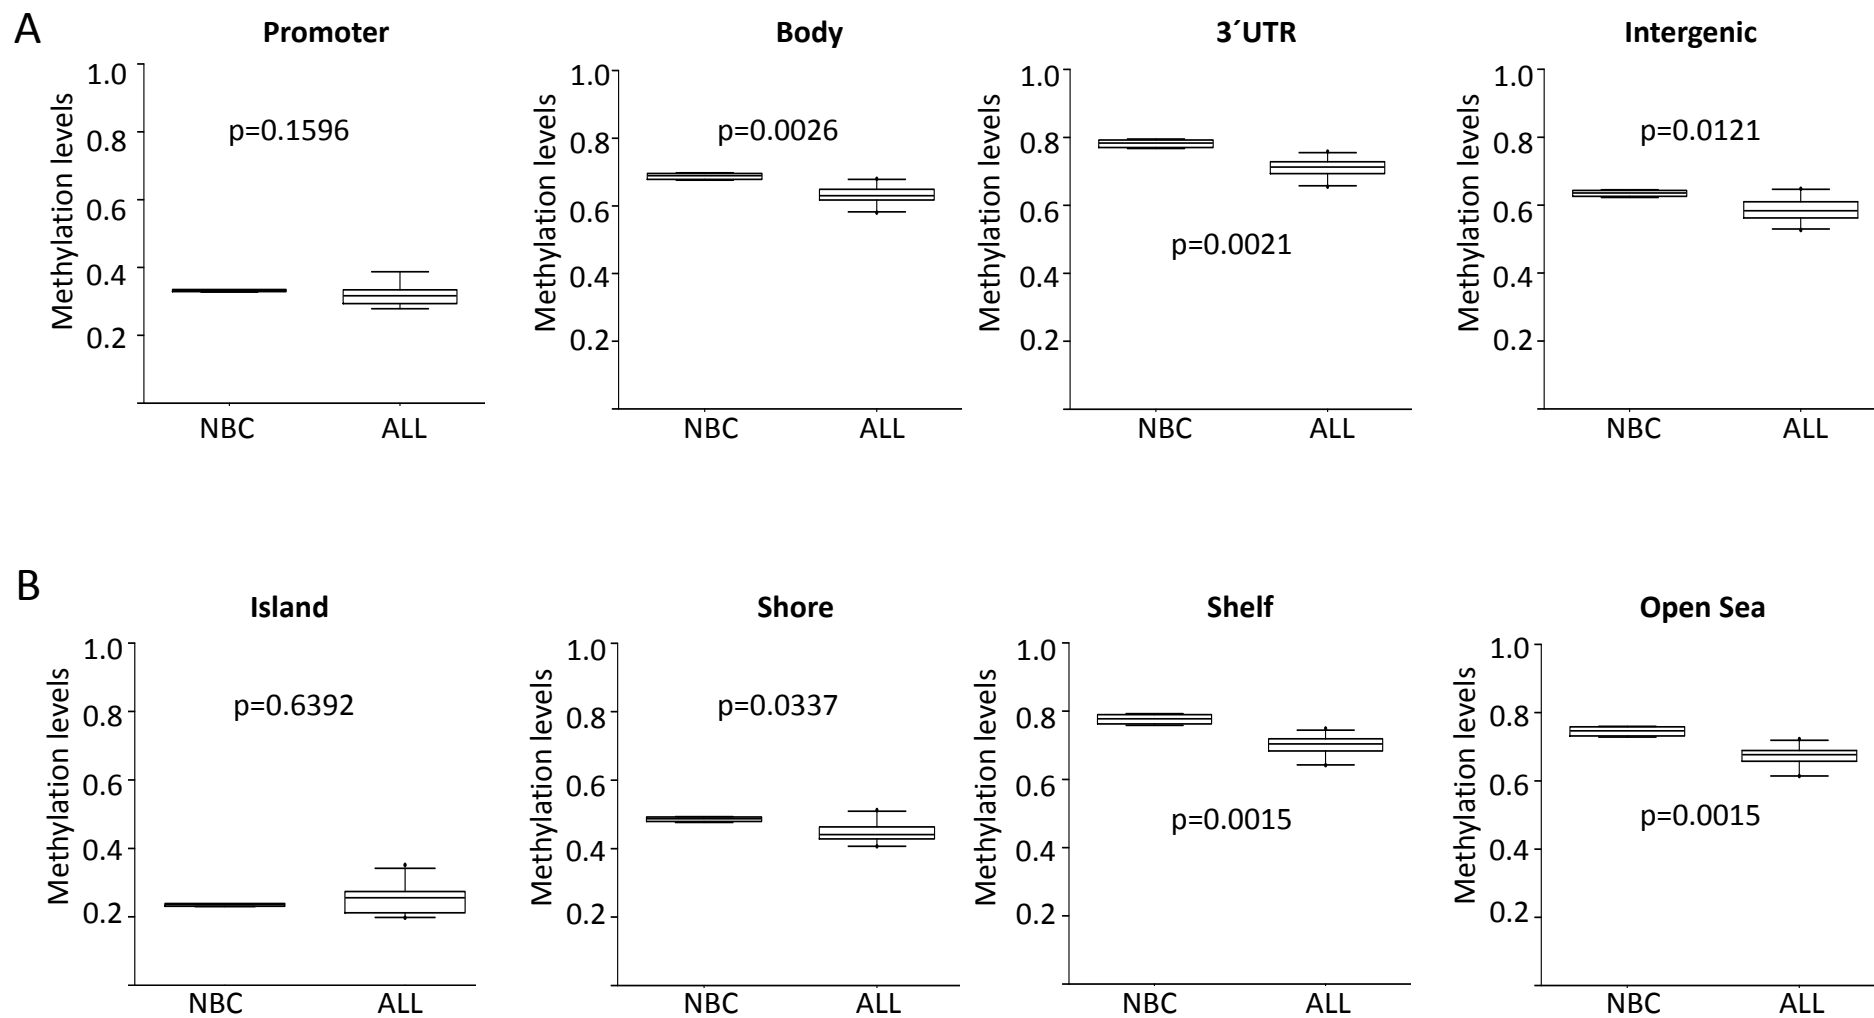

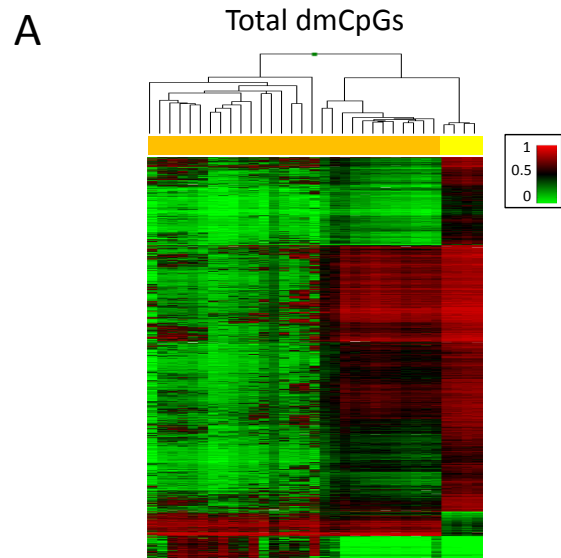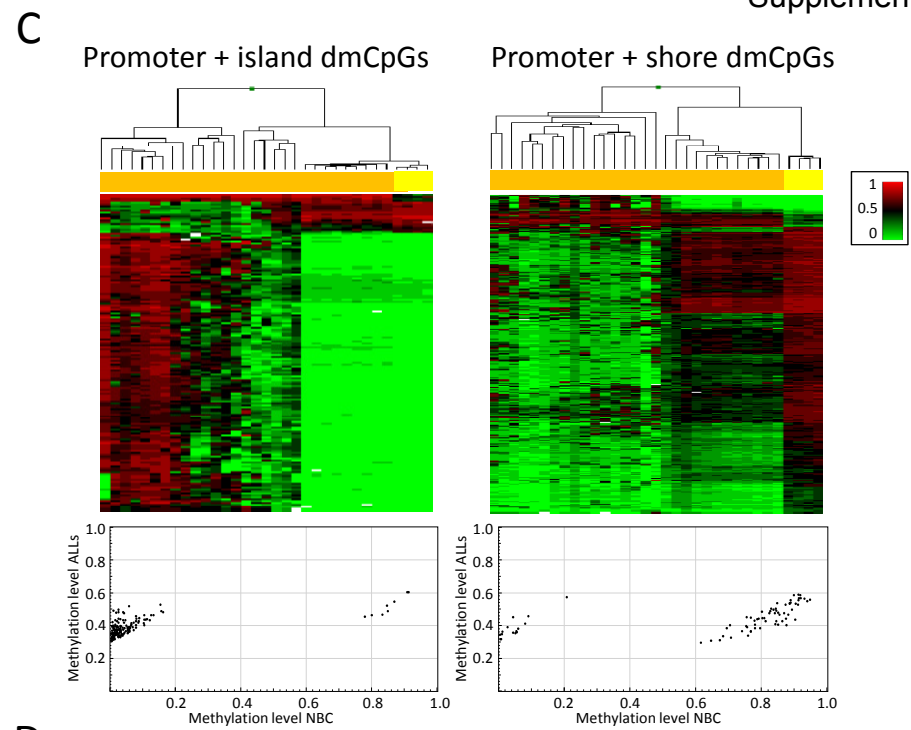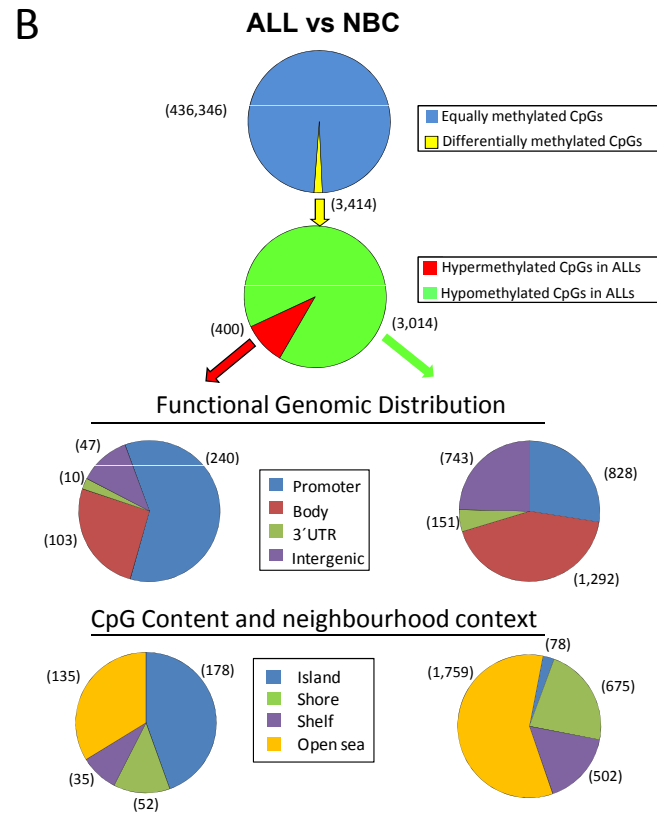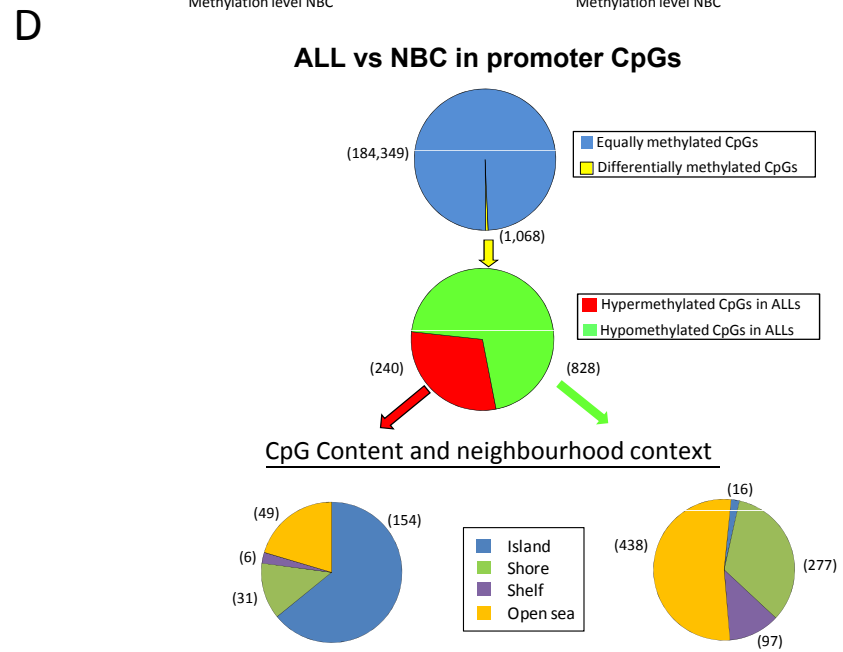

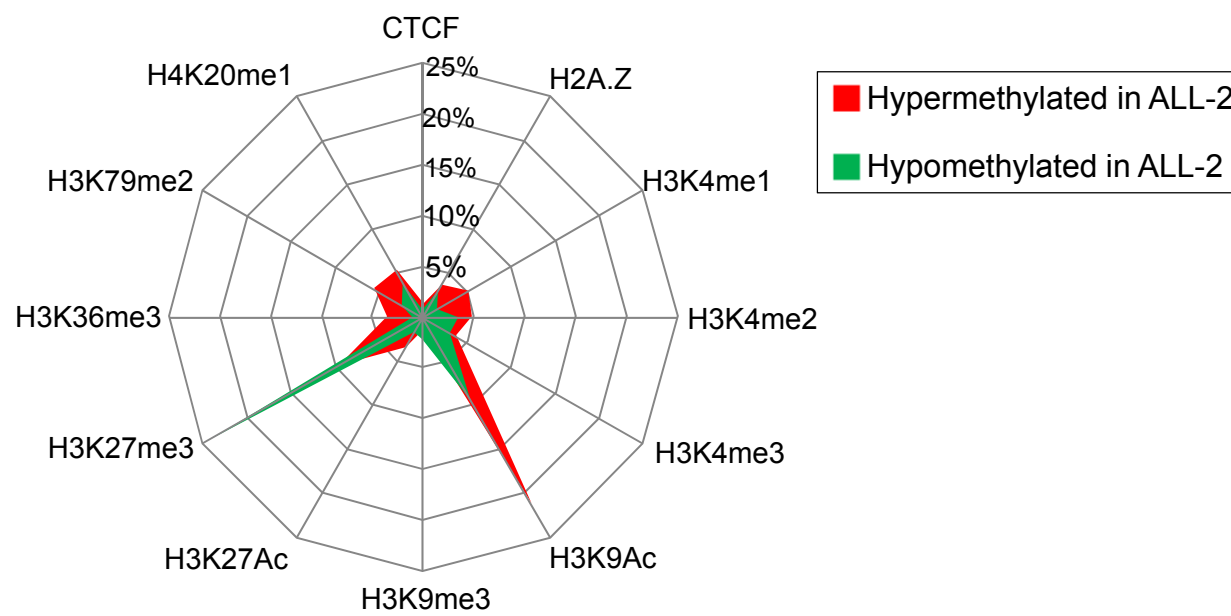

**Supplementary table 1:**

3,414 differentially methylated CpG sites comparing healthy B-cells and B-ALL samples.

| TargetID   | Gene name      | FDR         | $\delta$ $\beta$ -value |
|------------|----------------|-------------|-------------------------|
| cg13618969 | FAM125B        | 0.000420813 | 0.587643713             |
| cg16260349 | TSPAN14        | 0.000420813 | 0.581527076             |
| cg25305879 |                | 0.000420813 | 0.580689528             |
| cg22062741 | ARHGEF10       | 0.000420813 | 0.580321719             |
| cg17164954 | ARID1B         | 0.000420813 | 0.569513727             |
| cg15012027 |                | 0.000420813 | 0.567779348             |
| cg01752594 | DLEU2          | 0.000420813 | 0.566497211             |
| cg26574777 | PCCA;PCCA      | 0.000420813 | 0.560272571             |
| cg01606027 | LIMK2          | 0.000420813 | 0.557643037             |
| cg27660627 | ANKRD11        | 0.000420813 | 0.556003573             |
| cg21892720 | LAIR1;LAIR1    | 0.000420813 | 0.554996865             |
| cg10531355 | SERINC5        | 0.000420813 | 0.55446299              |
| cg19023589 | TMCO3          | 0.000420813 | 0.553312538             |
| cg11572080 | TRAF3IP2       | 0.000420813 | 0.550520591             |
| cg07186962 |                | 0.000420813 | 0.548628033             |
| cg18830993 | PELI2          | 0.000420813 | 0.548303734             |
| cg08140558 | NCRNA00171     | 0.000420813 | 0.544951783             |
| cg08539965 | EIF4G3         | 0.002321262 | 0.543304193             |
| cg00554993 | CEBPE          | 0.000420813 | 0.535818579             |
| cg04855678 | OSTalpha       | 0.000420813 | 0.535814386             |
| cg16995791 |                | 0.000420813 | 0.53414575              |
| cg21473786 |                | 0.000420813 | 0.533449657             |
| cg12147994 | SH3YL1         | 0.000420813 | 0.532864393             |
| cg24663338 |                | 0.000420813 | 0.531343315             |
| cg00211174 | MCM2           | 0.000420813 | 0.531321989             |
| cg09273683 | PIP4K2A        | 0.000420813 | 0.527628801             |
| cg19869035 | IQCE;IQCE      | 0.000420813 | 0.525398857             |
| cg11356375 | CDYL           | 0.000420813 | 0.525274452             |
| cg17444090 |                | 0.000420813 | 0.525210326             |
| cg27260684 | KIAA0513       | 0.000420813 | 0.524977049             |
| cg21346154 | TGFA;TGFA      | 0.000420813 | 0.52231356              |
| cg17036458 | SSH2           | 0.003004124 | 0.521700367             |
| cg12237948 | STK35          | 0.000420813 | 0.520230588             |
| cg14602393 |                | 0.000420813 | 0.520051378             |
| cg06512263 | CDKAL1         | 0.000420813 | 0.519638365             |
| cg08945443 | ZMYND17        | 0.000420813 | 0.518456567             |
| cg12039595 |                | 0.000420813 | 0.518106581             |
| cg04739200 | MYB            | 0.001569481 | 0.51786605              |
| cg12940181 |                | 0.000420813 | 0.5170386               |
| cg13814351 | FAM163B        | 0.000420813 | 0.514970422             |
| cg16353350 | C10orf55       | 0.000420813 | 0.514766935             |
| cg24833027 | ARHGEF10       | 0.000420813 | 0.513894871             |
| cg00382999 | NCK1           | 0.002321262 | 0.513860757             |
| cg24576960 | FAM114A1       | 0.000420813 | 0.513591024             |
| cg02187259 | FAM49A         | 0.000420813 | 0.51177517              |
| cg14043104 | KLF12          | 0.000420813 | 0.511110647             |
| cg10426076 | PRG2           | 0.000420813 | 0.510503736             |
| cg08130265 | C15orf5;SGK269 | 0.000420813 | 0.509788284             |
| cg16522993 |                | 0.000420813 | 0.508234922             |
| cg02329430 | NPTN           | 0.000420813 | 0.508179232             |
| cg17253709 | B3GNT2         | 0.000420813 | 0.507514427             |
| cg03997145 |                | 0.000420813 | 0.505999591             |
| cg04875041 | VPS13D;VPS13D  | 0.000420813 | 0.505896761             |
| cg19676553 | BRF1           | 0.000420813 | 0.504450884             |



|            |                             |             |             |
|------------|-----------------------------|-------------|-------------|
| cg02061820 | MBNL1                       | 0.005790932 | 0.503144639 |
| cg25137372 | HAL;HAL                     | 0.000420813 | 0.503033543 |
| cg13381110 | PHLPP1                      | 0.001569481 | 0.501241353 |
| cg15921911 |                             | 0.000420813 | 0.500625997 |
| cg07714276 | RREB1                       | 0.000420813 | 0.499622514 |
| cg21221540 |                             | 0.000420813 | 0.499238034 |
| cg13599613 | SH2D3C                      | 0.001569481 | 0.49779937  |
| cg01357222 |                             | 0.000420813 | 0.497179134 |
| cg18895476 | TPST2;TPST2                 | 0.000420813 | 0.495829873 |
| cg02259723 | ADPGK                       | 0.000420813 | 0.495343396 |
| cg25939853 |                             | 0.000420813 | 0.494842134 |
| cg14799927 | TRIM26                      | 0.000420813 | 0.494452283 |
| cg09583374 | ITGA5                       | 0.000420813 | 0.493912038 |
| cg01948978 | ATP2B4                      | 0.000420813 | 0.49366022  |
| cg22074114 | KY                          | 0.000420813 | 0.493032955 |
| cg27644327 | BACH2                       | 0.000420813 | 0.492259192 |
| cg18891604 |                             | 0.000420813 | 0.491835555 |
| cg05859076 | RAB43                       | 0.000532358 | 0.491276577 |
| cg25983531 | AOAH                        | 0.001569481 | 0.490251975 |
| cg25791430 | MRPL16                      | 0.000420813 | 0.489449428 |
| cg13375463 | AHDC1                       | 0.000420813 | 0.489251746 |
| cg26924822 | RBPJ                        | 0.000420813 | 0.489181147 |
| cg26117521 | EBF1                        | 0.000420813 | 0.488371318 |
| cg07804470 | STK24                       | 0.000420813 | 0.486971299 |
| cg23648239 |                             | 0.000420813 | 0.485998797 |
| cg11123644 | TTLL4                       | 0.000420813 | 0.485917165 |
| cg14150115 |                             | 0.000420813 | 0.48437091  |
| cg25194194 | SLC35E3                     | 0.000420813 | 0.484115163 |
| cg08670658 | ADRBK1                      | 0.000420813 | 0.483918083 |
| cg07690127 | MAD1L1                      | 0.000420813 | 0.483411452 |
| cg14210119 |                             | 0.000420813 | 0.483261202 |
| cg17494897 | TSSC1                       | 0.002321262 | 0.482028095 |
| cg17291166 |                             | 0.000420813 | 0.481507484 |
| cg02990302 | C16orf80                    | 0.000420813 | 0.48125955  |
| cg25084760 | PCCA;PCCA                   | 0.000420813 | 0.481161058 |
| cg19252328 | DOCK9;DOCK9;DOCK9;DOCK9     | 0.001569481 | 0.480845227 |
| cg16903174 | ASAP2;ASAP2                 | 0.000420813 | 0.479279184 |
| cg16061354 | SLC43A2                     | 0.000420813 | 0.479059085 |
| cg18693141 |                             | 0.000420813 | 0.478615681 |
| cg02226192 | ANKRD11                     | 0.000420813 | 0.47850741  |
| cg22090404 | RNASEH2B;RNASEH2B           | 0.000420813 | 0.477480079 |
| cg06496803 | TBC1D14;TBC1D14             | 0.000420813 | 0.477119262 |
| cg02484352 | PDLIM4;PDLIM4               | 0.000420813 | 0.477094634 |
| cg05760765 |                             | 0.001569481 | 0.476793688 |
| cg23924737 | MRPS23                      | 0.000420813 | 0.476417631 |
| cg16481332 | IQCE;IQCE                   | 0.000420813 | 0.475469317 |
| cg19370689 | LRRC17;FBXL13;LRRC17;FBXL13 | 0.000420813 | 0.475079222 |
| cg05949397 |                             | 0.002321262 | 0.474486215 |
| cg14199261 | CDK6;CDK6                   | 0.000420813 | 0.474479273 |
| cg10220544 | FGGY;FGGY                   | 0.003185744 | 0.474296206 |
| cg23299218 | DIAPH3                      | 0.000420813 | 0.473851466 |
| cg22729539 | MLXIP                       | 0.000420813 | 0.473465699 |
| cg20338754 | RNF138;RNF138               | 0.000420813 | 0.473094897 |
| cg07921759 | SAMD4A;SAMD4A               | 0.000420813 | 0.472993844 |
| cg14129169 | ZNF788                      | 0.000420813 | 0.472578474 |
| cg08096381 | IQSEC1                      | 0.002321262 | 0.472527459 |
| cg00828556 |                             | 0.002321262 | 0.472138842 |
| cg20794855 | ADHFE1                      | 0.001569481 | 0.471876586 |
| cg12041266 | ARRB1;ARRB1                 | 0.000420813 | 0.471224904 |

|            |                                      |             |             |
|------------|--------------------------------------|-------------|-------------|
| cg04704634 | IL3                                  | 0.000420813 | 0.471182871 |
| cg00819078 | FAM134B                              | 0.000636165 | 0.471116067 |
| cg07920381 |                                      | 0.000420813 | 0.47110648  |
| cg04431143 | CTDSPL;CTDSPL                        | 0.000420813 | 0.470745818 |
| cg17789193 |                                      | 0.000420813 | 0.470594393 |
| cg23100428 | SNAI1                                | 0.000420813 | 0.470577605 |
| cg13390284 |                                      | 0.000420813 | 0.470518053 |
| cg26514793 | CHST3                                | 0.000420813 | 0.470102404 |
| cg21671607 | RAG2;C11orf74                        | 0.002321262 | 0.46997861  |
| cg02662417 | ARID1B;ARID1B;ARID1B                 | 0.000636165 | 0.46940284  |
| cg15961455 |                                      | 0.002321262 | 0.469033339 |
| cg07205203 |                                      | 0.002321262 | 0.468879898 |
| cg22094071 | FAM82B                               | 0.000420813 | 0.468875656 |
| cg06418238 | RPTOR;RPTOR                          | 0.000420813 | 0.468404946 |
| cg12893030 | CHST3                                | 0.000420813 | 0.467884777 |
| cg02471848 |                                      | 0.000420813 | 0.467719069 |
| cg06380725 | TRAF3IP2;TRAF3IP2;TRAF3IP2;TRAF3IP2  | 0.000420813 | 0.467701736 |
| cg25154959 | RAG1                                 | 0.005790932 | 0.46749922  |
| cg00824381 |                                      | 0.000466745 | 0.467097454 |
| cg20723412 | TBC1D14;TBC1D14                      | 0.000420813 | 0.466540606 |
| cg10981439 | TREM1;TREM1                          | 0.002321262 | 0.466413541 |
| cg00291213 | RUNX1                                | 0.000420813 | 0.466268615 |
| cg16348358 | LCK                                  | 0.000420813 | 0.46624192  |
| cg18728780 |                                      | 0.002321262 | 0.466023223 |
| cg20995304 | HDAC7;HDAC7                          | 0.000420813 | 0.465725272 |
| cg17128308 | STX18                                | 0.000420813 | 0.46569802  |
| cg01766943 | SPTBN1;SPTBN1                        | 0.000420813 | 0.465530642 |
| cg23807570 | ATP2A2;ATP2A2;ATP2A2                 | 0.000420813 | 0.465525493 |
| cg09009070 | AUTS2;AUTS2                          | 0.000420813 | 0.465336394 |
| cg08796391 | MAD1L1;MAD1L1;MAD1L1                 | 0.000636165 | 0.465098576 |
| cg04804052 | SMARCA4;SMARCA4;SMARCA4;SMARCA4;SMAR | 0.000420813 | 0.464980642 |
| cg25037335 |                                      | 0.004997918 | 0.464589062 |
| cg14154784 | TLE1                                 | 0.000420813 | 0.464286049 |
| cg03138446 | SLC27A3                              | 0.000420813 | 0.464095853 |
| cg07197493 | SBF2                                 | 0.000636165 | 0.463650933 |
| cg23882164 |                                      | 0.000420813 | 0.463029993 |
| cg09485853 | PKM2;PKM2;PKM2                       | 0.003185744 | 0.462839032 |
| cg12592387 |                                      | 0.000420813 | 0.462736693 |
| cg06538549 | ITGB1;ITGB1                          | 0.000420813 | 0.462286537 |
| cg11018338 | CCDC109A                             | 0.000420813 | 0.462272187 |
| cg01942816 | MIR589;FBXL18                        | 0.000420813 | 0.462224632 |
| cg17237804 |                                      | 0.004405484 | 0.462046128 |
| cg10585941 | SMYD2                                | 0.002321262 | 0.46201058  |
| cg07824483 | MAFG;MAFG                            | 0.002321262 | 0.46176207  |
| cg23673974 | TBKBP1                               | 0.000420813 | 0.46155973  |
| cg13883633 | MGA;MGA                              | 0.000420813 | 0.461416714 |
| cg20594765 | GALNT2                               | 0.000420813 | 0.461387668 |
| cg16389345 |                                      | 0.000420813 | 0.461291478 |
| cg07708453 | PRDM2;PRDM2;PRDM2;PRDM2;PRDM2        | 0.000420813 | 0.461037877 |
| cg00874877 | C6orf10                              | 0.000420813 | 0.460871843 |
| cg21683390 | C18orf1;C18orf1                      | 0.000420813 | 0.460757498 |
| cg19683780 |                                      | 0.000420813 | 0.460753958 |
| cg09859659 | DENND3                               | 0.000420813 | 0.460575838 |
| cg01267797 | SERINC5                              | 0.000420813 | 0.459986683 |
| cg03308839 | NDE1;NDE1;MYH11;MYH11;MYH11;MYH11    | 0.007567702 | 0.459862525 |
| cg10594837 | DENND3                               | 0.000420813 | 0.459861662 |
| cg05303899 |                                      | 0.000420813 | 0.458989373 |
| cg19701828 |                                      | 0.000420813 | 0.458648183 |
| cg23169588 | TMCO3                                | 0.000420813 | 0.458615174 |

|            |                            |             |             |
|------------|----------------------------|-------------|-------------|
| cg01516792 | RPTOR;RPTOR                | 0.000420813 | 0.458120655 |
| cg16393899 | LYRM4;LYRM4                | 0.000420813 | 0.458072424 |
| cg15377871 | CEBPE;CEBPE                | 0.000420813 | 0.457949488 |
| cg26162326 | YWHAG                      | 0.007567702 | 0.457730107 |
| cg10336193 |                            | 0.000420813 | 0.457696781 |
| cg01481646 | TSPAN14;TSPAN14            | 0.000420813 | 0.457661055 |
| cg09481537 |                            | 0.000420813 | 0.457328788 |
| cg24765748 | GPRC5A                     | 0.000636165 | 0.457068856 |
| cg16846069 | SCNN1A;SCNN1A;SCNN1A       | 0.001173833 | 0.456915865 |
| cg14284211 | FKBP5;FKBP5;FKBP5;FKBP5    | 0.002321262 | 0.456158954 |
| cg15429134 | LOH12CR1                   | 0.000420813 | 0.45614663  |
| cg06178179 | CA7;CA7                    | 0.000420813 | 0.456052117 |
| cg02033302 |                            | 0.000420813 | 0.45594902  |
| cg01275661 |                            | 0.000420813 | 0.455440289 |
| cg12870750 | CHD3;CHD3;CHD3             | 0.000420813 | 0.455020835 |
| cg16548961 |                            | 0.000420813 | 0.454802879 |
| cg03801691 | VGLL4;VGLL4;VGLL4;VGLL4    | 0.000420813 | 0.454617682 |
| cg13521170 | BCL2                       | 0.000420813 | 0.454480623 |
| cg05113898 | RPTOR;RPTOR                | 0.000420813 | 0.454148742 |
| cg16646003 | POLS                       | 0.000420813 | 0.453845874 |
| cg13777984 | ENOX1;ENOX1                | 0.001038267 | 0.453759586 |
| cg07554408 |                            | 0.002321262 | 0.453745857 |
| cg16677191 | GLRX;GLRX                  | 0.000420813 | 0.453459127 |
| cg17411792 |                            | 0.000420813 | 0.453400591 |
| cg15087459 |                            | 0.003185744 | 0.452509222 |
| cg03686088 |                            | 0.000420813 | 0.452313186 |
| cg20555462 | UBASH3B                    | 0.000420813 | 0.452312838 |
| cg08210507 | MAD1L1;MAD1L1;MAD1L1       | 0.000420813 | 0.451728052 |
| cg08244301 | SLC27A1                    | 0.000420813 | 0.451572472 |
| cg11190658 | FAM167B                    | 0.000420813 | 0.451237737 |
| cg03846111 | ATF7IP                     | 0.000420813 | 0.451222099 |
| cg13765778 | DAPK1                      | 0.000420813 | 0.450589722 |
| cg05814100 | RPTOR;RPTOR                | 0.000636165 | 0.450432204 |
| cg23463186 | TSPAN14;TSPAN14            | 0.005790932 | 0.450092918 |
| cg10722267 |                            | 0.001569481 | 0.449953805 |
| cg24864097 | GRK5                       | 0.000420813 | 0.449655989 |
| cg10374402 | SH2D4B;SH2D4B;SH2D4B       | 0.00961166  | 0.449468274 |
| cg02779913 | TTC25                      | 0.007567702 | 0.449233625 |
| cg22830091 | YWHAG                      | 0.002321262 | 0.449222392 |
| cg12352399 | TOP2B                      | 0.000420813 | 0.449108036 |
| cg06399735 | PSD3                       | 0.000420813 | 0.448733082 |
| cg06419601 |                            | 0.000420813 | 0.448710926 |
| cg24710671 | C21orf2                    | 0.000420813 | 0.448687806 |
| cg26868097 | MBTPS1                     | 0.000420813 | 0.448548286 |
| cg00329411 |                            | 0.002321262 | 0.44823206  |
| cg05753799 | C20orf27                   | 0.000420813 | 0.448218757 |
| cg06840743 |                            | 0.000420813 | 0.448212078 |
| cg23200357 |                            | 0.000420813 | 0.447909052 |
| cg01179256 | CHST11                     | 0.000420813 | 0.447416005 |
| cg06155414 | MBNL2;MBNL2                | 0.000420813 | 0.447365423 |
| cg10834480 | TRAF3IP2;TRAF3IP2;TRAF3IP2 | 0.000420813 | 0.447171841 |
| cg09169633 | MAN2A2                     | 0.000420813 | 0.447061174 |
| cg11939496 | CD244;CD244;CD244          | 0.000420813 | 0.446937152 |
| cg09302474 | PIK3R5                     | 0.001038267 | 0.446785954 |
| cg17433678 | PFKP                       | 0.002321262 | 0.446785212 |
| cg27159096 | CMTM2                      | 0.000420813 | 0.446726187 |
| cg06933796 |                            | 0.001038267 | 0.446702135 |
| cg08134671 | GNG7                       | 0.001569481 | 0.446403804 |
| cg06684088 |                            | 0.007567702 | 0.446222538 |

|            |                                           |             |             |
|------------|-------------------------------------------|-------------|-------------|
| cg16385865 |                                           | 0.002321262 | 0.446129323 |
| cg09232805 | GALNTL6                                   | 0.000420813 | 0.446077954 |
| cg14519777 | CUX1;CUX1;CUX1                            | 0.000420813 | 0.446024522 |
| cg03006077 | TGFBR3                                    | 0.000420813 | 0.445763623 |
| cg24527636 |                                           | 0.000420813 | 0.445741667 |
| cg13323091 |                                           | 0.000420813 | 0.445740516 |
| cg25706447 | PIGV                                      | 0.000420813 | 0.445275201 |
| cg13071068 | AGPAT1;AGPAT1                             | 0.001569481 | 0.445071543 |
| cg07436694 | METTL9;METTL9                             | 0.007567702 | 0.444968893 |
| cg15489693 | CLNK                                      | 0.000420813 | 0.444887161 |
| cg09841898 | MAP4K5;MAP4K5                             | 0.000420813 | 0.444807153 |
| cg05413628 | CLCN7;CLCN7                               | 0.002321262 | 0.444787065 |
| cg10227830 | GAB1;GAB1                                 | 0.000420813 | 0.444766771 |
| cg04569233 | CX3CR1;CX3CR1;CX3CR1;CX3CR1;CX3CR1        | 0.000420813 | 0.444673612 |
| cg13365436 | AP2A2                                     | 0.003185744 | 0.444542614 |
| cg15288326 | KIF21B                                    | 0.001038267 | 0.443640547 |
| cg22893605 |                                           | 0.000420813 | 0.44360617  |
| cg11495377 |                                           | 0.000420813 | 0.443427649 |
| cg16675872 |                                           | 0.001038267 | 0.443207879 |
| cg19445044 |                                           | 0.000466745 | 0.443134768 |
| cg11198596 | LRIG1                                     | 0.002321262 | 0.443130223 |
| cg11555873 |                                           | 0.000420813 | 0.443060028 |
| cg20110257 | NRM                                       | 0.000420813 | 0.442981954 |
| cg14919455 | RREB1;RREB1;RREB1;RREB1                   | 0.002321262 | 0.442874996 |
| cg09755397 |                                           | 0.004405484 | 0.44283725  |
| cg10951380 | KIRREL                                    | 0.004405484 | 0.442810403 |
| cg20275211 | PPP2R2C;PPP2R2C                           | 0.001038267 | 0.442493135 |
| cg13271206 | RPS3                                      | 0.001038267 | 0.442202737 |
| cg09504873 | DYNC1LI2                                  | 0.004405484 | 0.442024151 |
| cg00901982 |                                           | 0.000420813 | 0.441757222 |
| cg03371275 | MAML2                                     | 0.000420813 | 0.441209308 |
| cg25201372 | TBC1D4                                    | 0.002321262 | 0.441144477 |
| cg07958192 | TIGD2;TIGD2                               | 0.000420813 | 0.441117368 |
| cg25020666 | YWHAG                                     | 0.00961166  | 0.440849753 |
| cg01182455 |                                           | 0.000420813 | 0.440796224 |
| cg17118262 | CCL1                                      | 0.000420813 | 0.440577517 |
| cg23221723 | TNFRSF10C                                 | 0.002321262 | 0.440319894 |
| cg03689092 | LIMS2;LIMS2                               | 0.001038267 | 0.440060899 |
| cg00785482 |                                           | 0.000420813 | 0.440016334 |
| cg18098769 | DNAH17                                    | 0.000420813 | 0.439901689 |
| cg13374432 | AKAP13;AKAP13                             | 0.005790932 | 0.439884471 |
| cg06812844 | TRPM2                                     | 0.000420813 | 0.439572796 |
| cg08091439 | AHCYL1                                    | 0.007567702 | 0.439566781 |
| cg06575692 | DUS2L                                     | 0.000420813 | 0.439476022 |
| cg04932082 |                                           | 0.002321262 | 0.439395702 |
| cg20159193 | NUDT3                                     | 0.000420813 | 0.439372883 |
| cg10938221 | KIAA0564                                  | 0.000420813 | 0.439287294 |
| cg23991413 | PDE4DIP                                   | 0.000420813 | 0.439179003 |
| cg08970648 | CISH;CISH                                 | 0.000420813 | 0.43899703  |
| cg15709065 | AMOTL2                                    | 0.000420813 | 0.438830292 |
| cg09588284 | ACRV1;ACRV1;ACRV1;ACRV1;ACRV1;ACRV1;AC    | 0.000420813 | 0.438724347 |
| cg25958098 | SLC12A6;SLC12A6;SLC12A6;SLC12A6;SLC12A6;S | 0.000636165 | 0.438372616 |
| cg04396303 | PDE11A;PDE11A;PDE11A;PDE11A               | 0.000420813 | 0.438109363 |
| cg10914815 | STK24;STK24                               | 0.000420813 | 0.437930409 |
| cg08619712 |                                           | 0.001569481 | 0.437511961 |
| cg16702362 | MGAT5                                     | 0.000420813 | 0.437431366 |
| cg14600368 |                                           | 0.000420813 | 0.437374972 |
| cg17814814 |                                           | 0.000420813 | 0.437255364 |
| cg00834988 | AUTS2;AUTS2                               | 0.000420813 | 0.436790155 |

|            |                      |             |             |
|------------|----------------------|-------------|-------------|
| cg05878073 | ABCD4;ABCD4          | 0.001038267 | 0.436633297 |
| cg06153925 | RPTOR;RPTOR          | 0.002321262 | 0.436590832 |
| cg00352106 | MACF1;MACF1          | 0.001038267 | 0.436574428 |
| cg08654262 | DDAH1;DDAH1          | 0.000636165 | 0.436459131 |
| cg00340349 | CDK9                 | 0.000420813 | 0.436385971 |
| cg06937549 | HNRNP1               | 0.000420813 | 0.436162962 |
| cg17397870 | TRIM39;TRIM39        | 0.000420813 | 0.436008869 |
| cg15823954 | HMHB1                | 0.005790932 | 0.435783993 |
| cg22489510 |                      | 0.000420813 | 0.435774499 |
| cg21440776 | IFFO1;IFFO1;IFFO1    | 0.000636165 | 0.435720751 |
| cg00035347 | NT5C2;NT5C2          | 0.000420813 | 0.435634259 |
| cg08837215 | UBE2O                | 0.000420813 | 0.435442112 |
| cg14329026 | SLA2;SLA2            | 0.000420813 | 0.435305229 |
| cg24211388 | AIF1;AIF1;AIF1       | 0.000420813 | 0.435288339 |
| cg06069407 | TMCO3                | 0.000420813 | 0.435116019 |
| cg10357682 | C20orf27             | 0.002321262 | 0.435045897 |
| cg08888553 | C16orf91             | 0.000420813 | 0.434999178 |
| cg23535322 |                      | 0.001777515 | 0.434838564 |
| cg02928840 | PLXNA2               | 0.001038267 | 0.433915719 |
| cg16596052 | RGS10;RGS10          | 0.003185744 | 0.433835908 |
| cg15030712 | CHN2                 | 0.004405484 | 0.433772739 |
| cg04898039 | MAD1L1;MAD1L1;MAD1L1 | 0.000420813 | 0.43326085  |
| cg18568335 | PACS2;PACS2          | 0.002321262 | 0.43322124  |
| cg03278564 |                      | 0.004405484 | 0.433158504 |
| cg07391141 |                      | 0.000420813 | 0.432994864 |
| cg06963709 |                      | 0.001038267 | 0.432758912 |
| cg24397007 | FOSL2                | 0.000420813 | 0.432475608 |
| cg21210041 | MYO18A;MYO18A        | 0.000420813 | 0.432220853 |
| cg09238666 | TK2                  | 0.000420813 | 0.43219353  |
| cg10903916 | ASAP2;ASAP2          | 0.000420813 | 0.432034311 |
| cg25865542 | CMTM7;CMTM7          | 0.000420813 | 0.432012434 |
| cg15793258 | TNFAIP8L1            | 0.000420813 | 0.431985672 |
| cg09354692 |                      | 0.001038267 | 0.431906122 |
| cg09406856 | LRIG1                | 0.000420813 | 0.431714391 |
| cg12110801 |                      | 0.000420813 | 0.431713087 |
| cg09039672 | ACVR1B;ACVR1B;ACVR1B | 0.004405484 | 0.431433112 |
| cg09417547 |                      | 0.000420813 | 0.43130757  |
| cg11845168 | XPO4                 | 0.000420813 | 0.431140671 |
| cg02615735 | LY6G5C               | 0.000420813 | 0.431116642 |
| cg14919082 |                      | 0.001038267 | 0.431114212 |
| cg02763540 | UHRF1;UHRF1          | 0.000420813 | 0.431037176 |
| cg07669182 | FYB;FYB              | 0.000420813 | 0.431009571 |
| cg26214026 | ATXN2                | 0.004405484 | 0.430948556 |
| cg05512561 |                      | 0.000420813 | 0.430855706 |
| cg21875980 | EGLN1                | 0.007567702 | 0.43055075  |
| cg08560387 | TSPAN14;TSPAN14      | 0.000420813 | 0.430225341 |
| cg23839180 | FAM49A               | 0.002321262 | 0.430024948 |
| cg08237971 |                      | 0.002321262 | 0.430021771 |
| cg04522498 | TRAPPC9;TRAPPC9      | 0.000420813 | 0.429828815 |
| cg10054332 | PVT1                 | 0.000420813 | 0.429722597 |
| cg00707814 | KDM2B;KDM2B          | 0.001038267 | 0.42970657  |
| cg24448870 | CHCHD6               | 0.000420813 | 0.429693109 |
| cg06079564 | HIPK2;HIPK2          | 0.001038267 | 0.429654504 |
| cg11118440 |                      | 0.001569481 | 0.42962297  |
| cg07266910 | ZMAT3;ZMAT3          | 0.001038267 | 0.429504454 |
| cg08550517 |                      | 0.000420813 | 0.42943135  |
| cg16386293 | ECM1;ECM1            | 0.000420813 | 0.429411614 |
| cg12449049 | CMAH                 | 0.000420813 | 0.429314887 |
| cg15889594 |                      | 0.000420813 | 0.429241001 |

|            |                                         |             |             |
|------------|-----------------------------------------|-------------|-------------|
| cg24092939 | ADCY6                                   | 0.000420813 | 0.429094982 |
| cg18242288 |                                         | 0.000420813 | 0.429084307 |
| cg14277677 | HIP1R                                   | 0.000420813 | 0.428619682 |
| cg00449738 |                                         | 0.000420813 | 0.42856917  |
| cg23590660 | FOXJ2                                   | 0.005790932 | 0.428473547 |
| cg02125365 |                                         | 0.002321262 | 0.4282509   |
| cg17980999 | PNLDC1                                  | 0.000420813 | 0.428183934 |
| cg27449572 | LOXL4                                   | 0.002321262 | 0.4281737   |
| cg05897963 | PLEKHF1                                 | 0.000420813 | 0.428092449 |
| cg06573096 |                                         | 0.000466745 | 0.427845843 |
| cg22006208 | SEZ6;SEZ6                               | 0.004405484 | 0.427779914 |
| cg02135427 |                                         | 0.000636165 | 0.427636518 |
| cg16306078 |                                         | 0.002321262 | 0.427632387 |
| cg13746813 |                                         | 0.001038267 | 0.427490861 |
| cg16229875 | CEBPE                                   | 0.002321262 | 0.427414637 |
| cg17571266 | ZNF385A;ZNF385A;ZNF385A                 | 0.000420813 | 0.427369818 |
| cg14989714 |                                         | 0.003185744 | 0.42736796  |
| cg24742520 | UBR4                                    | 0.00961166  | 0.427341565 |
| cg14541011 | RALGDS;RALGDS                           | 0.000420813 | 0.427336233 |
| cg00556100 |                                         | 0.002321262 | 0.42718181  |
| cg04100124 |                                         | 0.000636165 | 0.427166836 |
| cg09017001 |                                         | 0.000420813 | 0.427072174 |
| cg03072035 |                                         | 0.000420813 | 0.426824885 |
| cg00287012 | TTC39C;TTC39C;TTC39C                    | 0.000420813 | 0.426635084 |
| cg10864794 | ARSB;ARSB                               | 0.000420813 | 0.426560462 |
| cg23342367 | TPD52;TPD52                             | 0.002321262 | 0.426422059 |
| cg25681902 |                                         | 0.000420813 | 0.426363022 |
| cg00211115 |                                         | 0.000420813 | 0.426229277 |
| cg17200850 | HRH2;HRH2                               | 0.000420813 | 0.426083165 |
| cg08285589 | RAG1                                    | 0.000420813 | 0.425733492 |
| cg21054703 | ALOX5AP                                 | 0.000420813 | 0.425662085 |
| cg11898646 | EBF1                                    | 0.000420813 | 0.425531877 |
| cg02311864 | TNFRSF21                                | 0.000420813 | 0.425518626 |
| cg02482003 |                                         | 0.000636165 | 0.425511671 |
| cg10691395 |                                         | 0.003185744 | 0.425464418 |
| cg26633373 | MYADM;MYADM;MYADM;MYADM;MYADM           | 0.001569481 | 0.425345162 |
| cg10123514 | HLA-DMB                                 | 0.002321262 | 0.425263083 |
| cg13683301 |                                         | 0.000420813 | 0.425180352 |
| cg07795968 | JPH2;JPH2                               | 0.002321262 | 0.425093848 |
| cg01113988 |                                         | 0.001038267 | 0.424885771 |
| cg02734505 | ZNF385A;ZNF385A;ZNF385A                 | 0.000420813 | 0.424839491 |
| cg15659527 | TTC7A                                   | 0.000420813 | 0.424833738 |
| cg23558116 |                                         | 0.000636165 | 0.424817682 |
| cg00323915 | GIMAP4                                  | 0.000636165 | 0.424651754 |
| cg18445438 |                                         | 0.000420813 | 0.424414524 |
| cg09849688 | ARID1A;ARID1A                           | 0.003185744 | 0.42439067  |
| cg08024038 | RAI1                                    | 0.000420813 | 0.424252373 |
| cg22123711 | TNFRSF8;TNFRSF8                         | 0.000420813 | 0.424250518 |
| cg15826519 | CAPZB                                   | 0.002321262 | 0.424051717 |
| cg03003394 | KLF7                                    | 0.000420813 | 0.423842733 |
| cg18305855 | C7orf60                                 | 0.001038267 | 0.423617228 |
| cg22891595 |                                         | 0.000420813 | 0.423584675 |
| cg24982541 | CAST;CAST;CAST;CAST;CAST;CAST;CAST;CAST | 0.005790932 | 0.423504967 |
| cg05705140 |                                         | 0.000420813 | 0.42340749  |
| cg03134661 | UHRF1;UHRF1                             | 0.001038267 | 0.423356471 |
| cg24879415 | CYGB;PRCD                               | 0.000420813 | 0.423123999 |
| cg24760467 | LZTS2                                   | 0.000420813 | 0.423091949 |
| cg18790741 | NUP210                                  | 0.005790932 | 0.423070408 |
| cg10296867 | GAS7                                    | 0.000420813 | 0.422999769 |

|            |                             |             |             |
|------------|-----------------------------|-------------|-------------|
| cg12781678 |                             | 0.000420813 | 0.422855178 |
| cg04496824 | MTF1                        | 0.000420813 | 0.422833525 |
| cg17852326 | HLX                         | 0.000466745 | 0.42274208  |
| cg04191427 | RPTOR;RPTOR                 | 0.000636165 | 0.422741926 |
| cg12122241 | SIRPA;SIRPA;SIRPA           | 0.000420813 | 0.422728124 |
| cg15361215 | FAM45B;FAM45A               | 0.000420813 | 0.422408402 |
| cg18797923 | AMT;AMT;AMT;NICN1;AMT;AMT   | 0.000420813 | 0.422191436 |
| cg20318272 | PODXL;PODXL                 | 0.000420813 | 0.422097592 |
| cg16545743 | IL3                         | 0.000420813 | 0.422091581 |
| cg16565031 |                             | 0.002321262 | 0.422063622 |
| cg22612590 | TMCO3                       | 0.001038267 | 0.42141117  |
| cg00543769 |                             | 0.000420813 | 0.421243134 |
| cg10330187 | ZC3H18                      | 0.000420813 | 0.421177338 |
| cg07570498 | PHC2;PHC2                   | 0.000420813 | 0.421132739 |
| cg05163330 | ADPRHL1;ADPRHL1             | 0.001038267 | 0.421038645 |
| cg09142405 |                             | 0.000420813 | 0.420917803 |
| cg10996816 |                             | 0.000420813 | 0.420809027 |
| cg06677021 | SERINC5                     | 0.001569481 | 0.420783339 |
| cg23101885 | RAD51AP2                    | 0.000420813 | 0.420590028 |
| cg26904702 | SLC27A3                     | 0.000420813 | 0.419941863 |
| cg22690339 | BTBD9;BTBD9;BTBD9           | 0.000420813 | 0.419853074 |
| cg11973132 | ADRBK1                      | 0.000420813 | 0.419791755 |
| cg22222999 |                             | 0.000420813 | 0.419757665 |
| cg08498833 | TG                          | 0.000636165 | 0.419717227 |
| cg02299020 |                             | 0.000420813 | 0.41967975  |
| cg07078269 | PLXND1                      | 0.000420813 | 0.41961536  |
| cg08721026 |                             | 0.000420813 | 0.419399896 |
| cg04407063 | ADRBK1                      | 0.002321262 | 0.419265494 |
| cg03075156 | PRKCE                       | 0.000420813 | 0.419261216 |
| cg06806158 | RPS6KA2;RPS6KA2             | 0.000420813 | 0.419237933 |
| cg24135923 |                             | 0.000420813 | 0.419178695 |
| cg25600951 |                             | 0.000420813 | 0.419035382 |
| cg08994763 | C3orf21                     | 0.000420813 | 0.418888348 |
| cg19863456 | GPR157                      | 0.000636165 | 0.418879778 |
| cg10927461 |                             | 0.000420813 | 0.418516307 |
| cg14200572 | KIF13A;KIF13A;KIF13A;KIF13A | 0.003185744 | 0.4183017   |
| cg14434109 | BRD3                        | 0.000420813 | 0.418177022 |
| cg04398180 | ADPRHL1;ADPRHL1;ADPRHL1     | 0.000420813 | 0.418098606 |
| cg02889001 | CLCN7;CLCN7                 | 0.002321262 | 0.418007355 |
| cg20951650 | IRS1                        | 0.000420813 | 0.417976197 |
| cg04930596 | NCOR2;NCOR2                 | 0.000420813 | 0.417935645 |
| cg15602677 | SNTG2                       | 0.000420813 | 0.417875357 |
| cg24007886 | OBFC2B;SLC39A5              | 0.001569481 | 0.41784941  |
| cg24163263 |                             | 0.004405484 | 0.417637836 |
| cg16279861 |                             | 0.007567702 | 0.417497947 |
| cg04217515 | ITGB2;ITGB2                 | 0.001569481 | 0.417293459 |
| cg04316353 |                             | 0.001569481 | 0.417177125 |
| cg24630825 | GPM6A;GPM6A                 | 0.000420813 | 0.417005451 |
| cg12385032 | BCAS3;BCAS3                 | 0.000636165 | 0.41697438  |
| cg03554394 |                             | 0.004405484 | 0.416586081 |
| cg19759478 | C1orf183                    | 0.000420813 | 0.416558217 |
| cg13074203 | SNTB1                       | 0.005790932 | 0.416519303 |
| cg14114297 |                             | 0.002321262 | 0.416506108 |
| cg09139509 | RPTOR;RPTOR                 | 0.000636165 | 0.416280905 |
| cg26394055 | FCER1G                      | 0.002321262 | 0.416158613 |
| cg20893838 | RREB1;RREB1;RREB1;RREB1     | 0.000420813 | 0.416124725 |
| cg27025738 | SIPA1L1                     | 0.000420813 | 0.416047834 |
| cg01142676 | FXYD2;FXYD2;FXYD2           | 0.001569481 | 0.415818482 |
| cg15818109 | COL11A2;COL11A2;COL11A2     | 0.000420813 | 0.41572791  |

|            |                                                  |             |             |
|------------|--------------------------------------------------|-------------|-------------|
| cg20382047 | C6orf25;C6orf25;C6orf25;C6orf25;C6orf25;C6orf25; | 0.000420813 | 0.415707017 |
| cg24405716 | MTMR10                                           | 0.000420813 | 0.415466032 |
| cg00644351 | RGS10;RGS10                                      | 0.004405484 | 0.415465659 |
| cg16770832 | PELI2                                            | 0.000420813 | 0.415436173 |
| cg07993367 | ATP6V0E2;LOC401431;ATP6V0E2                      | 0.000420813 | 0.415118313 |
| cg18185648 | ABCA4                                            | 0.000420813 | 0.41505417  |
| cg17717972 | ARHGEF10                                         | 0.000420813 | 0.415016229 |
| cg00416882 | PIAS2;PIAS2                                      | 0.000420813 | 0.415006903 |
| cg19948549 | D4S234E;D4S234E                                  | 0.000420813 | 0.414960252 |
| cg09274091 | LTB4R;LTB4R;CIDEB                                | 0.000466745 | 0.414896948 |
| cg22147446 | SLC23A2;SLC23A2                                  | 0.000420813 | 0.414806128 |
| cg03029090 | LIPC                                             | 0.000420813 | 0.414804948 |
| cg13492133 | SMG7;SMG7;SMG7                                   | 0.000420813 | 0.414697677 |
| cg21109666 | DISC1;DISC1;DISC1;DISC1;DISC1;TSNAX-DISC1;       | 0.005790932 | 0.414629372 |
| cg03463948 | UBASH3B                                          | 0.003185744 | 0.414548834 |
| cg03625953 | SMG6;SMG6                                        | 0.000420813 | 0.414504549 |
| cg16584662 | PML;PML;PML;PML;PML;PML;PML;PML                  | 0.001569481 | 0.414374241 |
| cg21515305 | ELFN2                                            | 0.001038267 | 0.414299042 |
| cg04008438 |                                                  | 0.000420813 | 0.414292021 |
| cg21899461 | STK39                                            | 0.000636165 | 0.414201129 |
| cg17434577 | RPTOR;RPTOR                                      | 0.000420813 | 0.413982058 |
| cg27226125 | ALG1L2                                           | 0.000420813 | 0.41367683  |
| cg08454507 | RPTOR;RPTOR                                      | 0.000420813 | 0.413555607 |
| cg27457201 | RPTOR;RPTOR                                      | 0.000420813 | 0.413548603 |
| cg05124117 |                                                  | 0.001569481 | 0.413507298 |
| cg15891546 | DENND3                                           | 0.000420813 | 0.413418081 |
| cg26407841 |                                                  | 0.002321262 | 0.413365351 |
| cg01213231 | ITGA5                                            | 0.000420813 | 0.41327048  |
| cg21606953 | NRM                                              | 0.004405484 | 0.413183223 |
| cg15686615 |                                                  | 0.000420813 | 0.413091283 |
| cg20176098 |                                                  | 0.001038267 | 0.412799423 |
| cg07197230 | CECR2                                            | 0.005790932 | 0.412764907 |
| cg12338690 | POM121                                           | 0.000420813 | 0.412735459 |
| cg07620928 |                                                  | 0.000636165 | 0.412610386 |
| cg19714347 | TRIM26                                           | 0.000636165 | 0.412591638 |
| cg01256139 | RBMS1;RBMS1                                      | 0.00961166  | 0.412565459 |
| cg26567012 | GLRA1;GLRA1                                      | 0.002321262 | 0.412564051 |
| cg13623749 | JARID2                                           | 0.000636165 | 0.412503196 |
| cg24519108 | ANGPT2;ANGPT2;ANGPT2;MCPH1                       | 0.002321262 | 0.412363768 |
| cg26207766 |                                                  | 0.001569481 | 0.412313411 |
| cg02332073 | TSGA13                                           | 0.000420813 | 0.412300222 |
| cg25709789 | TAOK1                                            | 0.000636165 | 0.412267604 |
| cg14943796 | BAHCC1                                           | 0.001569481 | 0.412256086 |
| cg12970757 | SLC2A14                                          | 0.000420813 | 0.41195433  |
| cg15906007 | DDX17;DDX17                                      | 0.004405484 | 0.411918324 |
| cg05591126 |                                                  | 0.000420813 | 0.411817793 |
| cg06622199 | SEPT9;SEPT9;SEPT9;SEPT9;SEPT9                    | 0.000420813 | 0.411706976 |
| cg10658307 |                                                  | 0.001569481 | 0.411685422 |
| cg27566842 | ADARB2                                           | 0.000420813 | 0.411597334 |
| cg00271311 | CNTF;ZFP91-CNTF                                  | 0.000420813 | 0.411559226 |
| cg20748242 | RNF44                                            | 0.000420813 | 0.411484462 |
| cg02873783 |                                                  | 0.001569481 | 0.411400516 |
| cg09183124 |                                                  | 0.000636165 | 0.411273732 |
| cg00638210 | PLXNA1                                           | 0.002321262 | 0.411223356 |
| cg13499923 |                                                  | 0.000420813 | 0.411193356 |
| cg19513987 | MAD1L1;MAD1L1;MAD1L1                             | 0.000420813 | 0.411142541 |
| cg07091529 | FAM49A                                           | 0.000420813 | 0.411007262 |
| cg13519902 |                                                  | 0.000420813 | 0.410957212 |
| cg25124300 | XDH                                              | 0.007567702 | 0.410888504 |



|            |                                              |             |             |
|------------|----------------------------------------------|-------------|-------------|
| cg13242871 | PREX1                                        | 0.000420813 | 0.410800013 |
| cg16564828 | MCF2L;MCF2L                                  | 0.002321262 | 0.410696488 |
| cg00520380 | LIMK2;LIMK2;LIMK2                            | 0.000466745 | 0.410580561 |
| cg00391031 | KIAA1274                                     | 0.000420813 | 0.41056809  |
| cg07880727 | C7orf69;PKD1L1                               | 0.000420813 | 0.410448228 |
| cg22091236 | RPTOR;RPTOR                                  | 0.000420813 | 0.41041799  |
| cg14495953 | LOC728606                                    | 0.000420813 | 0.410290241 |
| cg15225325 | PDLIM7;PDLIM7;PDLIM7                         | 0.000420813 | 0.410285426 |
| cg20628942 | TMCO3                                        | 0.001038267 | 0.410257044 |
| cg15091747 | RUNX1                                        | 0.000420813 | 0.410241102 |
| cg06595162 | NCRNA00114;NCRNA00114                        | 0.000420813 | 0.410230768 |
| cg19478079 |                                              | 0.000420813 | 0.410106681 |
| cg02043791 | FGFR1;FGFR1;FGFR1;FGFR1;FGFR1;FGFR1;FGFR1    | 0.001569481 | 0.410052648 |
| cg18308031 |                                              | 0.000420813 | 0.409797047 |
| cg05626616 | SEPT9;SEPT9;SEPT9;SEPT9;SEPT9;SEPT9;SEPT9    | 0.000420813 | 0.409666837 |
| cg22386492 | KIAA1026;KIAA1026                            | 0.000636165 | 0.409614926 |
| cg06448249 | CD79A;CD79A                                  | 0.000420813 | 0.409386568 |
| cg15354065 | DGKA;DGKA;DGKA;DGKA                          | 0.005790932 | 0.409361523 |
| cg25153741 | COL23A1                                      | 0.004405484 | 0.409353415 |
| cg08051604 | MEG3;MEG3;MEG3                               | 0.002321262 | 0.409035137 |
| cg03990819 |                                              | 0.002321262 | 0.408985097 |
| cg26443127 |                                              | 0.007567702 | 0.408932374 |
| cg13104185 | RERE;RERE                                    | 0.002321262 | 0.408928295 |
| cg13536447 |                                              | 0.002321262 | 0.408894302 |
| cg08203192 | PRKCE                                        | 0.000420813 | 0.408828895 |
| cg09152136 |                                              | 0.003185744 | 0.40881568  |
| cg00255699 | TRIT1                                        | 0.005790932 | 0.408644247 |
| cg24897320 | CYB561D1;CYB561D1;CYB561D1;CYB561D1;CYB561D1 | 0.001038267 | 0.40861638  |
| cg13745692 | FHIT;FHIT                                    | 0.001038267 | 0.408575243 |
| cg02855207 | RELT;RELT                                    | 0.000420813 | 0.408371036 |
| cg14294646 | FAM125B                                      | 0.000420813 | 0.408143384 |
| cg05226180 | KCNMA1;KCNMA1;KCNMA1;KCNMA1                  | 0.000636165 | 0.407964006 |
| cg01012242 | SLC37A3;SLC37A3                              | 0.000420813 | 0.407920482 |
| cg03437540 | PRR5;PRR5-ARHGAP8;PRR5;PRR5;PRR5;PRR5        | 0.000420813 | 0.407904798 |
| cg03475687 | TBCD                                         | 0.003185744 | 0.407783842 |
| cg10451425 | ARMC5;ARMC5                                  | 0.000420813 | 0.407639933 |
| cg18173184 |                                              | 0.000420813 | 0.407617286 |
| cg21680729 | PEMT;PEMT;PEMT                               | 0.000719053 | 0.407550632 |
| cg03325407 | BCL2L15                                      | 0.000420813 | 0.407520891 |
| cg23714707 | PEMT;PEMT;PEMT                               | 0.000420813 | 0.407408847 |
| cg23465650 | EBF1                                         | 0.000420813 | 0.407246504 |
| cg27441486 | NAV1;NAV1                                    | 0.000420813 | 0.407095446 |
| cg03471346 | ABL2;ABL2;ABL2;ABL2;ABL2;ABL2;ABL2;ABL2;ABL2 | 0.001038267 | 0.407061297 |
| cg18165707 | DENND3                                       | 0.000420813 | 0.406952964 |
| cg24561419 |                                              | 0.007567702 | 0.406884323 |
| cg23925650 |                                              | 0.000420813 | 0.406815783 |
| cg14907310 |                                              | 0.001569481 | 0.406723965 |
| cg07537699 | LY6G5C                                       | 0.000420813 | 0.406565157 |
| cg08655953 | PLCH2                                        | 0.000420813 | 0.406462152 |
| cg16661761 | LOXL2                                        | 0.000420813 | 0.406449852 |
| cg14594044 | TBC1D14;TBC1D14                              | 0.000420813 | 0.406397968 |
| cg12182708 | MMS19                                        | 0.000420813 | 0.406308579 |
| cg23189692 | EIF4G1;EIF4G1;EIF4G1;EIF4G1;EIF4G1           | 0.00961166  | 0.406142364 |
| cg06285909 | TMCO7                                        | 0.000420813 | 0.405961119 |
| cg18741439 | CSGALNACT1;CSGALNACT1;CSGALNACT1             | 0.000420813 | 0.405871488 |
| cg25510823 |                                              | 0.001038267 | 0.405865177 |
| cg10111352 | ABCC1;ABCC1;ABCC1;ABCC1;ABCC1                | 0.000420813 | 0.405818733 |
| cg20072792 | RECQL5;LOC643008;LOC643008                   | 0.004405484 | 0.405805996 |
| cg02561343 | UST                                          | 0.000420813 | 0.405582599 |

|            |                                           |             |             |
|------------|-------------------------------------------|-------------|-------------|
| cg04006133 | HSDL1;HSDL1                               | 0.000420813 | 0.405563064 |
| cg01578442 |                                           | 0.000420813 | 0.405543844 |
| cg06380320 | SEPT9;SEPT9;SEPT9;SEPT9;SEPT9             | 0.000420813 | 0.405454292 |
| cg00629382 | MSRA;MSRA;MSRA                            | 0.000420813 | 0.405403523 |
| cg17192381 | BCL2                                      | 0.000420813 | 0.405403062 |
| cg14267222 |                                           | 0.000420813 | 0.405403054 |
| cg22946147 | ZNF804B;MGC26647                          | 0.000420813 | 0.405320492 |
| cg01513063 | SEPT9;SEPT9;SEPT9;SEPT9;SEPT9;SEPT9;SEPT9 | 0.000420813 | 0.405117436 |
| cg05379597 | CAMK2G;CAMK2G;CAMK2G;CAMK2G;CAMK2G        | 0.000420813 | 0.405042906 |
| cg02420027 |                                           | 0.000420813 | 0.404863876 |
| cg26062560 | C3orf21                                   | 0.000420813 | 0.404844669 |
| cg05894462 | PTPRN2;PTPRN2;PTPRN2                      | 0.000420813 | 0.404716764 |
| cg02729344 |                                           | 0.000420813 | 0.404697251 |
| cg27579771 | ARHGAP26;ARHGAP26                         | 0.00961166  | 0.404621601 |
| cg11937033 |                                           | 0.000420813 | 0.404620426 |
| cg25839744 | FAM65C                                    | 0.000420813 | 0.404601872 |
| cg21328082 | TREM1                                     | 0.007567702 | 0.404580812 |
| cg25888881 | ZNF438;ZNF438;ZNF438;ZNF438;ZNF438;ZNF438 | 0.000420813 | 0.404480659 |
| cg11846618 | BRF1                                      | 0.000420813 | 0.404417526 |
| cg19997662 | CHSY1                                     | 0.000420813 | 0.404301891 |
| cg01883989 | KLF7                                      | 0.000420813 | 0.404081152 |
| cg18447740 | OSCAR;OSCAR;OSCAR;OSCAR                   | 0.000420813 | 0.404016012 |
| cg20923885 | SEPT9;SEPT9;SEPT9;SEPT9;SEPT9;SEPT9;SEPT9 | 0.000420813 | 0.403941813 |
| cg25223634 | C10orf26;C10orf26                         | 0.000420813 | 0.403666183 |
| cg05488778 | ARHGEF10                                  | 0.000420813 | 0.403592002 |
| cg24864663 | TGM5;TGM5                                 | 0.000420813 | 0.403420972 |
| cg20539175 | TMCO3                                     | 0.000420813 | 0.403409936 |
| cg03255417 |                                           | 0.002321262 | 0.403377083 |
| cg26421805 |                                           | 0.001569481 | 0.403372826 |
| cg05050341 | ENG;ENG                                   | 0.000420813 | 0.40335188  |
| cg23140706 | NFE2;NFE2                                 | 0.001569481 | 0.403276228 |
| cg14039779 | DUSP3;C17orf105                           | 0.002321262 | 0.403240954 |
| cg05850884 | TRIM26                                    | 0.007567702 | 0.403181146 |
| cg03965138 | SIGLEC5                                   | 0.000420813 | 0.403151271 |
| cg02027561 | NCOA7;NCOA7                               | 0.000420813 | 0.403123119 |
| cg00329157 | GCET2;GCET2                               | 0.000420813 | 0.40292056  |
| cg16725974 | SYNE2;SYNE2                               | 0.004405484 | 0.402743293 |
| cg06439889 |                                           | 0.000420813 | 0.402488845 |
| cg06411447 | ANKRD11                                   | 0.000420813 | 0.402325174 |
| cg18464903 | IGF2BP2;IGF2BP2                           | 0.001038267 | 0.402247074 |
| cg09742346 | CMIP;CMIP                                 | 0.000420813 | 0.402063778 |
| cg01937932 | ITGAX                                     | 0.000420813 | 0.401980428 |
| cg17353680 | KCNK12                                    | 0.002321262 | 0.40176163  |
| cg05347794 | FOXP3;FOXP3                               | 0.000420813 | 0.401687302 |
| cg21617903 | VGLL4;VGLL4;VGLL4;VGLL4                   | 0.000420813 | 0.401625069 |
| cg16131053 |                                           | 0.000420813 | 0.401562809 |
| cg22450342 | MR1                                       | 0.000420813 | 0.401551262 |
| cg18393175 |                                           | 0.003185744 | 0.401536417 |
| cg07464408 |                                           | 0.004405484 | 0.401414297 |
| cg04406620 | CYB5B                                     | 0.007567702 | 0.401412022 |
| cg05727149 | CFDP1                                     | 0.002321262 | 0.401349037 |
| cg21679402 | THAP4                                     | 0.004405484 | 0.401326733 |
| cg16569650 | GNA12                                     | 0.000420813 | 0.401277372 |
| cg07267067 | SOAT2                                     | 0.000420813 | 0.401228738 |
| cg06547715 | CXCR2;CXCR2;CXCR2                         | 0.002321262 | 0.401083738 |
| cg22020227 | OLFML3                                    | 0.000420813 | 0.401006094 |
| cg20145598 | SGTA                                      | 0.002321262 | 0.400853298 |
| cg08810397 | CLCN7;CLCN7                               | 0.001569481 | 0.400759109 |
| cg20580833 | CRTAC1                                    | 0.000420813 | 0.400709449 |

|            |                                  |             |             |
|------------|----------------------------------|-------------|-------------|
| cg26797124 |                                  | 0.001038267 | 0.400694679 |
| cg08876518 | CMIP;CMIP                        | 0.004405484 | 0.400636454 |
| cg19226017 | FKBP5;LOC285847                  | 0.000420813 | 0.40062724  |
| cg10351692 | POM121C                          | 0.001777515 | 0.400468786 |
| cg01981181 | LMBR1L                           | 0.000420813 | 0.400330203 |
| cg09526022 | NRXN2;NRXN2                      | 0.000420813 | 0.400233247 |
| cg25963412 | ACOX3;ACOX3                      | 0.002321262 | 0.400175484 |
| cg23007087 | AP3S2;AP3S2                      | 0.000420813 | 0.400117503 |
| cg15440661 |                                  | 0.000420813 | 0.399926144 |
| cg18847118 |                                  | 0.000420813 | 0.399650947 |
| cg01882471 |                                  | 0.005790932 | 0.399622321 |
| cg21027282 | RAD51L1;RAD51L1;RAD51L1          | 0.001038267 | 0.399569112 |
| cg19605623 | SCHIP1                           | 0.000420813 | 0.399510554 |
| cg08444833 | EIF2C2;EIF2C2                    | 0.001569481 | 0.399383766 |
| cg19095143 | TEX264;TEX264;TEX264             | 0.000420813 | 0.399330086 |
| cg17648076 |                                  | 0.000420813 | 0.399282745 |
| cg06083200 | PPP1R11                          | 0.000420813 | 0.399257344 |
| cg10370574 | REXO1                            | 0.004405484 | 0.399235881 |
| cg26475911 | KCTD2                            | 0.000420813 | 0.399200408 |
| cg13702949 |                                  | 0.000636165 | 0.399194604 |
| cg20636248 |                                  | 0.000420813 | 0.399191076 |
| cg17758673 | RGS12;RGS12                      | 0.001569481 | 0.399147657 |
| cg15416352 | MNT                              | 0.000420813 | 0.39903744  |
| cg21323630 | PCBP4;PCBP4;PCBP4                | 0.000420813 | 0.39886007  |
| cg11360546 | C7orf50;C7orf50;C7orf50          | 0.000420813 | 0.398848827 |
| cg22586996 | EBF1                             | 0.001038267 | 0.398733975 |
| cg25597952 | MAD1L1;MAD1L1;MAD1L1             | 0.000420813 | 0.398670033 |
| cg00735329 | MBP;MBP                          | 0.000420813 | 0.398655684 |
| cg02845870 |                                  | 0.000420813 | 0.398651715 |
| cg04581293 |                                  | 0.000420813 | 0.398607051 |
| cg04781916 | MSH6                             | 0.000636165 | 0.398569549 |
| cg22866998 | DIP2C                            | 0.000420813 | 0.398452871 |
| cg04854098 | TSPAN5                           | 0.000420813 | 0.398375144 |
| cg01433914 | ADD3;ADD3;ADD3                   | 0.000420813 | 0.398354544 |
| cg06747087 | MIR595;PTPRN2;PTPRN2;PTPRN2      | 0.000420813 | 0.398099581 |
| cg09634212 | HDAC4                            | 0.001569481 | 0.398030125 |
| cg14207267 | IQCD                             | 0.00961166  | 0.397905313 |
| cg14071925 | LILRA1                           | 0.000420813 | 0.397879174 |
| cg23751110 |                                  | 0.001569481 | 0.397793185 |
| cg14724265 | PPEF2;PPEF2                      | 0.000420813 | 0.397665031 |
| cg18641463 | MAD1L1;MAD1L1;MAD1L1             | 0.004405484 | 0.397620976 |
| cg09802818 | LOC283404                        | 0.005790932 | 0.39756268  |
| cg15123742 | CSGALNACT1;CSGALNACT1;CSGALNACT1 | 0.000420813 | 0.397371853 |
| cg15888569 | CPEB2;CPEB2                      | 0.000420813 | 0.397300491 |
| cg19668724 |                                  | 0.000420813 | 0.3972923   |
| cg23804842 | ZNF705A;ZNF705A                  | 0.000420813 | 0.397255212 |
| cg22698744 | RUNX1                            | 0.000420813 | 0.397248237 |
| cg20426042 | PGCP                             | 0.002321262 | 0.397143182 |
| cg13810695 |                                  | 0.000420813 | 0.39706181  |
| cg14773365 | HRH2;HRH2                        | 0.000420813 | 0.396972297 |
| cg19020666 |                                  | 0.001038267 | 0.396940932 |
| cg08832745 | FBXL13;FBXL13                    | 0.001038267 | 0.396887232 |
| cg08529825 | HIPK1;HIPK1                      | 0.001569481 | 0.396835124 |
| cg15673994 | TNRC4                            | 0.000420813 | 0.396818004 |
| cg01116477 |                                  | 0.001038267 | 0.396607336 |
| cg23312431 | TRPM2                            | 0.000420813 | 0.396554581 |
| cg23715732 | RPTOR;RPTOR                      | 0.000420813 | 0.396503828 |
| cg15572396 | PXK                              | 0.001038267 | 0.396490586 |
| cg17855390 |                                  | 0.000636165 | 0.396312387 |

|            |                                        |             |             |
|------------|----------------------------------------|-------------|-------------|
| cg06372223 | SLC7A5                                 | 0.000420813 | 0.396151237 |
| cg24228231 |                                        | 0.000420813 | 0.396131339 |
| cg05590818 | TLK1;TLK1                              | 0.000420813 | 0.396053906 |
| cg24674269 |                                        | 0.004405484 | 0.396044355 |
| cg03845363 | TOM1L2;TOM1L2                          | 0.000420813 | 0.396001324 |
| cg21571160 | C4BPB;C4BPB;C4BPB;C4BPB;C4BPB          | 0.002321262 | 0.395795193 |
| cg13497089 | SCD5;SCD5                              | 0.002321262 | 0.39578015  |
| cg15128555 | IGFBP2                                 | 0.000420813 | 0.39555505  |
| cg19742736 | TBC1D20                                | 0.000420813 | 0.395497966 |
| cg21582611 |                                        | 0.000420813 | 0.39545175  |
| cg05006384 | C14orf49                               | 0.000420813 | 0.395288444 |
| cg05951776 | PEX14                                  | 0.000420813 | 0.39521085  |
| cg14205216 |                                        | 0.000420813 | 0.395082146 |
| cg25389087 | MBP;MBP                                | 0.000420813 | 0.394948886 |
| cg20387392 | ZBTB20;ZBTB20;ZBTB20;ZBTB20            | 0.003185744 | 0.394915937 |
| cg17195635 |                                        | 0.001569481 | 0.394909066 |
| cg03425860 |                                        | 0.001569481 | 0.394881182 |
| cg05583921 | ZBTB47                                 | 0.001569481 | 0.394864714 |
| cg04384112 | CFDP1                                  | 0.000636165 | 0.394845257 |
| cg26419676 |                                        | 0.000636165 | 0.394810376 |
| cg25422678 | BRE;BRE;BRE;BRE;BRE                    | 0.000420813 | 0.394721284 |
| cg12125772 |                                        | 0.001038267 | 0.394712208 |
| cg00899659 | C10orf25;ZNF22                         | 0.000420813 | 0.394600112 |
| cg25256141 | CUX1;CUX1;CUX1                         | 0.003185744 | 0.394562432 |
| cg20150640 | C1orf213;C1orf213;C1orf213;ZNF436      | 0.001038267 | 0.394472392 |
| cg01976921 |                                        | 0.000420813 | 0.394448785 |
| cg13601957 |                                        | 0.000420813 | 0.394402326 |
| cg08772206 | SH2D4B;SH2D4B                          | 0.000420813 | 0.394377112 |
| cg27585822 | FAM65C                                 | 0.000420813 | 0.394345615 |
| cg17823346 | ZMIZ1                                  | 0.000420813 | 0.394292783 |
| cg23079727 | VGLL4;ATG7;VGLL4;ATG7;VGLL4;ATG7;VGLL4 | 0.000420813 | 0.394275436 |
| cg17065712 | ZMIZ1                                  | 0.001038267 | 0.394264092 |
| cg07202353 | EHD4                                   | 0.000420813 | 0.394092822 |
| cg14083146 | RALGAPA2                               | 0.005790932 | 0.393987318 |
| cg27301488 |                                        | 0.001569481 | 0.393965359 |
| cg18151635 |                                        | 0.000636165 | 0.393793895 |
| cg24554439 | TMCO3                                  | 0.000420813 | 0.393624588 |
| cg24444059 | LOC158376                              | 0.000420813 | 0.393563647 |
| cg27531842 |                                        | 0.000420813 | 0.393541028 |
| cg02999224 | SLC7A7;SLC7A7;SLC7A7;SLC7A7            | 0.007567702 | 0.393473227 |
| cg05261759 | TOR2A;TOR2A;TOR2A;TOR2A                | 0.000420813 | 0.39341069  |
| cg24903893 | EBF1                                   | 0.002321262 | 0.39339906  |
| cg07428959 | PHF17;PHF17                            | 0.000636165 | 0.393344417 |
| cg05845831 |                                        | 0.000636165 | 0.393249129 |
| cg12150931 | ZNF385A;ZNF385A                        | 0.000420813 | 0.393175149 |
| cg17341174 | BAIAP2L1                               | 0.001569481 | 0.393036    |
| cg20216752 | ALOX12                                 | 0.000636165 | 0.392998828 |
| cg24143611 | SNORD23;GLTSCR2                        | 0.000636165 | 0.392969621 |
| cg12201988 | RIN2                                   | 0.007567702 | 0.392899964 |
| cg15034267 | GTPBP1                                 | 0.000420813 | 0.392805298 |
| cg14223485 | C9orf25                                | 0.000420813 | 0.392594753 |
| cg08684511 | COL23A1                                | 0.000636165 | 0.392582693 |
| cg05606799 | KISS1                                  | 0.000420813 | 0.392565696 |
| cg25083732 | S100P                                  | 0.004405484 | 0.392391416 |
| cg07127883 |                                        | 0.001569481 | 0.392366116 |
| cg10422067 | TP53I11;TP53I11                        | 0.000420813 | 0.392360883 |
| cg16471612 |                                        | 0.000420813 | 0.392147891 |
| cg02713162 | SPRY4;SPRY4                            | 0.000636165 | 0.392107016 |
| cg13853953 | THAP4;THAP4                            | 0.000420813 | 0.392013383 |

|            |                                     |             |             |
|------------|-------------------------------------|-------------|-------------|
| cg25364972 |                                     | 0.003185744 | 0.391960786 |
| cg00456343 |                                     | 0.000420813 | 0.391943904 |
| cg00378158 | LARGE;LARGE                         | 0.000420813 | 0.391924906 |
| cg00395296 | NDUFA6                              | 0.000420813 | 0.391828107 |
| cg00810971 |                                     | 0.004405484 | 0.391697668 |
| cg03417473 | MOV10;MOV10                         | 0.000420813 | 0.391687003 |
| cg27162435 | KCNAB3                              | 0.005790932 | 0.391649694 |
| cg23351327 | PRKAG2;PRKAG2                       | 0.000420813 | 0.391468213 |
| cg25202370 | HIVEP3;HIVEP3                       | 0.000420813 | 0.391460924 |
| cg04731810 | HLTF;HLTF                           | 0.000420813 | 0.391423309 |
| cg23679982 | SMYD4                               | 0.000420813 | 0.391355026 |
| cg08999812 | TBCD                                | 0.001569481 | 0.39128358  |
| cg27047494 |                                     | 0.000420813 | 0.391233162 |
| cg16657152 |                                     | 0.002321262 | 0.391006813 |
| cg08252384 | FAM153B                             | 0.003185744 | 0.390910289 |
| cg21271945 | PRKCZ;PRKCZ;PRKCZ                   | 0.002321262 | 0.390839284 |
| cg25073093 | NRXN2;NRXN2                         | 0.000420813 | 0.390713202 |
| cg05132782 |                                     | 0.000420813 | 0.390566729 |
| cg15648345 | MKS1;MKS1                           | 0.002321262 | 0.390527161 |
| cg07053162 | PPL                                 | 0.000420813 | 0.390509382 |
| cg08166362 | C3orf37;C3orf37                     | 0.004405484 | 0.39049309  |
| cg14170787 | AKAP2;PALM2-AKAP2;PALM2-AKAP2;AKAP2 | 0.000420813 | 0.390482416 |
| cg26780819 |                                     | 0.000420813 | 0.39032714  |
| cg11414202 | NLK                                 | 0.007567702 | 0.390299962 |
| cg01340991 | SYNGAP1                             | 0.000420813 | 0.390267703 |
| cg07910529 | MAD1L1;MAD1L1;MAD1L1                | 0.000420813 | 0.390237636 |
| cg22799757 | SCRN1;SCRN1;SCRN1;SCRN1             | 0.000420813 | 0.390197847 |
| cg24607603 | KIAA2018                            | 0.000466745 | 0.389929271 |
| cg26391080 | SH2D4B                              | 0.000420813 | 0.389928722 |
| cg17519749 | MYT1L                               | 0.000420813 | 0.389881566 |
| cg02771673 | PCCA;PCCA                           | 0.002321262 | 0.389851673 |
| cg25649826 | USP22                               | 0.000420813 | 0.389797766 |
| cg24694018 | POLR3GL                             | 0.000420813 | 0.389695648 |
| cg16241062 |                                     | 0.001038267 | 0.389562809 |
| cg13868473 | MAD1L1;MAD1L1;MAD1L1                | 0.000420813 | 0.38949512  |
| cg04870120 |                                     | 0.004405484 | 0.389424294 |
| cg08305575 |                                     | 0.003185744 | 0.389352318 |
| cg23048001 | MAD1L1;MAD1L1;MAD1L1                | 0.001777515 | 0.389336182 |
| cg20414082 |                                     | 0.001038267 | 0.389250647 |
| cg21126943 | CEACAM6                             | 0.002321262 | 0.389188418 |
| cg12067421 |                                     | 0.002321262 | 0.389184217 |
| cg16785938 | SLC2A9;SLC2A9                       | 0.001569481 | 0.389023141 |
| cg20892919 |                                     | 0.001038267 | 0.388917178 |
| cg24733614 | CHST11                              | 0.000420813 | 0.388809664 |
| cg10087651 | FAM109A                             | 0.000420813 | 0.388596729 |
| cg05163268 |                                     | 0.000420813 | 0.388538241 |
| cg08390994 | APOL3;APOL3                         | 0.000420813 | 0.38836535  |
| cg00970435 | ARSG                                | 0.001038267 | 0.388308808 |
| cg00110545 |                                     | 0.000420813 | 0.388301151 |
| cg12886494 | ARPP-21;ARPP-21;ARPP-21             | 0.007567702 | 0.388300955 |
| cg02451443 |                                     | 0.001569481 | 0.388282239 |
| cg26075639 |                                     | 0.000719053 | 0.38827696  |
| cg19225688 | CXCR2;CXCR2;CXCR2                   | 0.004405484 | 0.388248224 |
| cg16081096 | IQSEC1;IQSEC1                       | 0.000420813 | 0.388202874 |
| cg04005793 | OBFC2B;SLC39A5                      | 0.005790932 | 0.38818689  |
| cg18352516 |                                     | 0.000420813 | 0.388182784 |
| cg25738350 |                                     | 0.000420813 | 0.388146678 |
| cg04502852 |                                     | 0.000420813 | 0.388113648 |
| cg07651540 | LOC728606                           | 0.002321262 | 0.388104574 |

|            |                                    |             |             |
|------------|------------------------------------|-------------|-------------|
| cg10108888 |                                    | 0.000420813 | 0.388092172 |
| cg13985446 |                                    | 0.001038267 | 0.387663628 |
| cg19796955 | TBK1                               | 0.001038267 | 0.387649635 |
| cg17588094 |                                    | 0.001569481 | 0.387631001 |
| cg13354414 | ZNF804B;MGC26647                   | 0.000420813 | 0.387624586 |
| cg10395101 | ANGPT2;ANGPT2;ANGPT2;MCPH1         | 0.001038267 | 0.387567271 |
| cg08925046 | PDLIM1                             | 0.004229594 | 0.387534584 |
| cg00008671 | FAM190B                            | 0.003185744 | 0.387489648 |
| cg04159006 |                                    | 0.000420813 | 0.387480353 |
| cg10601159 | THAP4;THAP4                        | 0.001569481 | 0.387417459 |
| cg08115618 |                                    | 0.000420813 | 0.387401287 |
| cg14608550 | SEPT9;SEPT9;SEPT9;SEPT9;SEPT9      | 0.000420813 | 0.387365821 |
| cg25863735 | ADAL                               | 0.001038267 | 0.387353568 |
| cg15833565 | ERI3                               | 0.002321262 | 0.387304041 |
| cg05955436 | RRBP1;RRBP1                        | 0.000420813 | 0.387278919 |
| cg08351131 | HEXIM2                             | 0.000420813 | 0.387241347 |
| cg03818307 | ECM1;ECM1;ECM1;ECM1                | 0.000420813 | 0.38710728  |
| cg20486551 |                                    | 0.000420813 | 0.387090416 |
| cg21836905 |                                    | 0.000420813 | 0.386995062 |
| cg07187268 | C22orf15                           | 0.000420813 | 0.386944707 |
| cg16462433 |                                    | 0.000636165 | 0.386883078 |
| cg00110171 | NFATC1;NFATC1;NFATC1;NFATC1;NFATC1 | 0.000636165 | 0.386693942 |
| cg02547426 | RGS12;RGS12;RGS12                  | 0.000420813 | 0.386604108 |
| cg00748432 | SLC25A18                           | 0.000420813 | 0.386566116 |
| cg12551813 | CAMSAP1L1                          | 0.000420813 | 0.386475015 |
| cg26306329 |                                    | 0.000420813 | 0.386282082 |
| cg23716690 | KIF1B;KIF1B                        | 0.000636165 | 0.386250307 |
| cg07340007 | STK24;STK24                        | 0.002321262 | 0.38623244  |
| cg27507284 | NFE2L2;NFE2L2;NFE2L2               | 0.002321262 | 0.386229213 |
| cg05035470 |                                    | 0.000636165 | 0.386208674 |
| cg17169037 | KDM2B;KDM2B                        | 0.000420813 | 0.386155124 |
| cg03554335 | C17orf72                           | 0.000420813 | 0.38614984  |
| cg09172244 | EBF1                               | 0.000636165 | 0.386098259 |
| cg27405731 | CUX1;CUX1;CUX1                     | 0.000636165 | 0.386037596 |
| cg01824284 | BAHCC1                             | 0.000420813 | 0.386025878 |
| cg00223136 |                                    | 0.000636165 | 0.385928028 |
| cg07598021 | GRPEL2                             | 0.000420813 | 0.385887699 |
| cg15636295 | HBEGF                              | 0.000420813 | 0.385811186 |
| cg03602500 | KIR3DX1                            | 0.000636165 | 0.38579259  |
| cg00566158 | PTPRN2;PTPRN2;PTPRN2               | 0.000420813 | 0.385721474 |
| cg15448894 |                                    | 0.007567702 | 0.385720813 |
| cg07496207 | ERGIC1                             | 0.000420813 | 0.385717245 |
| cg17250929 | S100A5                             | 0.000420813 | 0.385663502 |
| cg08961793 | SULT1A1                            | 0.002321262 | 0.385663207 |
| cg02329670 | MIR497;MIR195                      | 0.000420813 | 0.385613181 |
| cg00343063 | ZNF213;ZNF213                      | 0.000420813 | 0.385595418 |
| cg19334176 | DIP2C                              | 0.002321262 | 0.385569235 |
| cg24307601 |                                    | 0.000420813 | 0.385391286 |
| cg08840913 | ATAD2B                             | 0.000420813 | 0.385383804 |
| cg11809958 | FGD4                               | 0.002321262 | 0.385375591 |
| cg00967073 |                                    | 0.000636165 | 0.385359452 |
| cg12656896 |                                    | 0.000420813 | 0.385351029 |
| cg18477569 | BACH2;BACH2                        | 0.002321262 | 0.385305454 |
| cg02532853 | NCRNA00114;NCRNA00114              | 0.003185744 | 0.385266178 |
| cg04363470 | PPFIBP2                            | 0.000420813 | 0.385261572 |
| cg05338167 | CALML4;CALML4;CALML4;CALML4        | 0.002321262 | 0.385182497 |
| cg15207662 | HRH2;HRH2                          | 0.000420813 | 0.385176347 |
| cg06205746 | ADPRHL1;ADPRHL1                    | 0.000420813 | 0.385125221 |
| cg09926649 | COMT;COMT;COMT                     | 0.000466745 | 0.385123514 |

|            |                                           |             |             |
|------------|-------------------------------------------|-------------|-------------|
| cg24339704 | GNG7                                      | 0.001569481 | 0.385109158 |
| cg04714478 |                                           | 0.000420813 | 0.385089016 |
| cg08788930 | DENND3                                    | 0.000636165 | 0.384966663 |
| cg10673192 | TRAPPC9;TRAPPC9                           | 0.002321262 | 0.38495848  |
| cg00686823 | TPRA1                                     | 0.000420813 | 0.384928332 |
| cg05027594 | TAPT1                                     | 0.000636165 | 0.384832385 |
| cg01883208 | PCNXL2                                    | 0.000420813 | 0.384809802 |
| cg09977718 | RPTOR;RPTOR                               | 0.002321262 | 0.384779062 |
| cg27168573 | PXN;PXN                                   | 0.000420813 | 0.384710088 |
| cg07125981 | CUL2                                      | 0.001777515 | 0.384618492 |
| cg12559197 | PDE8B;PDE8B;PDE8B;PDE8B;PDE8B             | 0.000420813 | 0.384587141 |
| cg20738719 | SEMA5B                                    | 0.000420813 | 0.384579189 |
| cg05367967 |                                           | 0.002321262 | 0.384522603 |
| cg01565508 | PIK3R5                                    | 0.000420813 | 0.38428931  |
| cg13679772 | FOXN3                                     | 0.004405484 | 0.384281378 |
| cg06601266 | C10orf119                                 | 0.000420813 | 0.384273375 |
| cg24162781 |                                           | 0.004405484 | 0.384270628 |
| cg01192077 | EBF1                                      | 0.007567702 | 0.384264068 |
| cg04822495 | PLXNC1                                    | 0.001569481 | 0.384184396 |
| cg07052737 |                                           | 0.002321262 | 0.384057377 |
| cg23554917 | UBASH3B                                   | 0.000420813 | 0.384015397 |
| cg10445988 | MAD1L1;MAD1L1;MAD1L1                      | 0.000420813 | 0.384009817 |
| cg03585084 | LHPP;LHPP                                 | 0.000420813 | 0.38392763  |
| cg05991009 | RFX8                                      | 0.002321262 | 0.383893231 |
| cg06573088 | CAP2                                      | 0.000420813 | 0.383842637 |
| cg20097219 | TBC1D16                                   | 0.001038267 | 0.383795688 |
| cg07831553 |                                           | 0.000420813 | 0.383753051 |
| cg03408354 | SLC7A5                                    | 0.000420813 | 0.383748987 |
| cg16664617 | SLC27A1                                   | 0.000420813 | 0.383722263 |
| cg16201957 | MAML3                                     | 0.000420813 | 0.383661449 |
| cg22912818 | TMCO3                                     | 0.000420813 | 0.383617828 |
| cg07164388 | LTB4R2;LTB4R2;LTB4R2;LTB4R2;LTB4R;CIDEB;L | 0.000420813 | 0.383613601 |
| cg17803713 | SH3RF3                                    | 0.000420813 | 0.383590552 |
| cg12045443 |                                           | 0.000636165 | 0.383403204 |
| cg19384448 |                                           | 0.002321262 | 0.383333806 |
| cg07815238 |                                           | 0.001038267 | 0.383326868 |
| cg10211062 |                                           | 0.000420813 | 0.383215088 |
| cg07924575 | HPS4;SRRD                                 | 0.005790932 | 0.383126716 |
| cg22898924 | ARRDC5                                    | 0.000420813 | 0.3830458   |
| cg04681879 | RPTOR;RPTOR                               | 0.000420813 | 0.383010961 |
| cg00920938 | BMP1;BMP1;BMP1                            | 0.001038267 | 0.38300216  |
| cg24171555 | AAK1                                      | 0.007567702 | 0.382936784 |
| cg00920254 | SLC29A1;SLC29A1;SLC29A1;SLC29A1;SLC29A1   | 0.000420813 | 0.382850478 |
| cg14374994 | PDCD1LG2                                  | 0.000636165 | 0.382783148 |
| cg18642369 | DOCK9;DOCK9                               | 0.000420813 | 0.382762138 |
| cg16560824 | DENND3                                    | 0.000420813 | 0.382639276 |
| cg03228516 | CSNK1E;CSNK1E                             | 0.000420813 | 0.382575122 |
| cg17713161 | C17orf28                                  | 0.000420813 | 0.382533125 |
| cg06267718 | ELFN2                                     | 0.000420813 | 0.382435521 |
| cg16182375 | ZMIZ1                                     | 0.000420813 | 0.382426717 |
| cg18366956 | SDK2                                      | 0.000420813 | 0.382332485 |
| cg27470433 | CACNA1C;CACNA1C;CACNA1C;CACNA1C;CACN      | 0.000420813 | 0.382274177 |
| cg10920329 |                                           | 0.000420813 | 0.382186149 |
| cg14364926 | ZER1                                      | 0.000420813 | 0.382143479 |
| cg22255288 | RPTOR;RPTOR                               | 0.000420813 | 0.382139102 |
| cg08559364 | VGLL4;VGLL4                               | 0.000420813 | 0.382106728 |
| cg14786790 | FAM13A                                    | 0.000466745 | 0.382003721 |
| cg10104487 |                                           | 0.000420813 | 0.381946782 |
| cg05481243 | BID;BID                                   | 0.000420813 | 0.381916641 |

|            |                                           |             |             |
|------------|-------------------------------------------|-------------|-------------|
| cg13071069 | IQSEC1;IQSEC1                             | 0.000420813 | 0.381858414 |
| cg15862380 | DIP2C                                     | 0.001569481 | 0.381617685 |
| cg19991046 | DENND3                                    | 0.001038267 | 0.381524988 |
| cg14276125 | ADRBK1                                    | 0.002321262 | 0.381366213 |
| cg05597945 | BANP;BANP                                 | 0.000420813 | 0.381231621 |
| cg04751089 | IRS1                                      | 0.000420813 | 0.381185178 |
| cg26103719 | FBLN5                                     | 0.001569481 | 0.381163497 |
| cg03400731 | C17orf85;C17orf85                         | 0.001569481 | 0.381095379 |
| cg03556480 | IGFBP2                                    | 0.000466745 | 0.381082308 |
| cg15584954 | DIP2C                                     | 0.000636165 | 0.381045293 |
| cg03331229 | MMP13                                     | 0.000420813 | 0.381040161 |
| cg08219486 | RPTOR;RPTOR                               | 0.000420813 | 0.380917402 |
| cg19212779 | FRYL                                      | 0.000420813 | 0.380841179 |
| cg15522953 | ZMIZ1                                     | 0.000420813 | 0.380770907 |
| cg02052797 |                                           | 0.000636165 | 0.380751514 |
| cg14503564 | LDB2;LDB2                                 | 0.007567702 | 0.380590446 |
| cg22124221 |                                           | 0.000420813 | 0.380570195 |
| cg03604774 |                                           | 0.000420813 | 0.380547075 |
| cg19348484 | FURIN                                     | 0.000420813 | 0.380538504 |
| cg24517501 | GFI1;GFI1                                 | 0.000420813 | 0.380531934 |
| cg16580197 |                                           | 0.002321262 | 0.380530564 |
| cg25644380 | BCL3                                      | 0.000420813 | 0.380476741 |
| cg23036852 |                                           | 0.001569481 | 0.380386697 |
| cg02345886 | GALNT3                                    | 0.007567702 | 0.380203412 |
| cg24834394 |                                           | 0.002321262 | 0.380181496 |
| cg00872683 |                                           | 0.000420813 | 0.379978987 |
| cg01432609 | RPTOR;RPTOR                               | 0.000420813 | 0.379794894 |
| cg15447017 | LMNA;LMNA;LMNA                            | 0.000420813 | 0.379785272 |
| cg23260484 | EFCAB2;EFCAB2;EFCAB2;EFCAB2;EFCAB2        | 0.000636165 | 0.379765323 |
| cg14109456 | NEK6;NEK6;NEK6;NEK6                       | 0.000420813 | 0.379687784 |
| cg14689122 | PDIA5;PDIA5                               | 0.000420813 | 0.379687493 |
| cg13408655 | COL15A1                                   | 0.000636165 | 0.379521052 |
| cg02482730 | SEPT9;SEPT9;SEPT9;SEPT9;SEPT9;SEPT9;SEPT9 | 0.000420813 | 0.379451994 |
| cg04406229 |                                           | 0.000420813 | 0.379430628 |
| cg11601967 | MAD1L1;MAD1L1;MAD1L1                      | 0.000420813 | 0.379423774 |
| cg03295274 |                                           | 0.005790932 | 0.379377357 |
| cg08070491 | SP2                                       | 0.001569481 | 0.379329535 |
| cg26686009 | C10orf25;ZNF22                            | 0.000420813 | 0.379181389 |
| cg15029935 | CRTC3;CRTC3                               | 0.003185744 | 0.37907813  |
| cg22437221 | FYB;FYB                                   | 0.001569481 | 0.379048249 |
| cg26275848 |                                           | 0.000420813 | 0.379042221 |
| cg19821988 | ATP2A3;ATP2A3;ATP2A3;ATP2A3;ATP2A3;ATP2A3 | 0.000420813 | 0.378658903 |
| cg06576340 | PILRB;PILRB;PILRB                         | 0.000420813 | 0.378646676 |
| cg20615117 | SORL1                                     | 0.005790932 | 0.378566123 |
| cg17491300 | ARHGEF10                                  | 0.000420813 | 0.378564426 |
| cg13549638 | RPTOR;RPTOR                               | 0.000420813 | 0.37848574  |
| cg02410870 | TRABD                                     | 0.000420813 | 0.378407821 |
| cg10540679 |                                           | 0.000420813 | 0.378404026 |
| cg12051956 | C12orf53                                  | 0.000420813 | 0.378396726 |
| cg07176064 | HMGXB4;HMGXB4                             | 0.001569481 | 0.378312901 |
| cg26628751 | B3GNTL1                                   | 0.001038267 | 0.378290206 |
| cg01391548 |                                           | 0.000420813 | 0.378281177 |
| cg11014810 | SH3PXD2A                                  | 0.000420813 | 0.378224131 |
| cg16977751 | AP1B1;AP1B1;SNORD125;AP1B1                | 0.002321262 | 0.378145591 |
| cg04855961 |                                           | 0.001569481 | 0.378084868 |
| cg16230060 | RNU5E;RNU5D;CKMT2;CKMT2;CKMT2             | 0.000420813 | 0.378029453 |
| cg01364674 |                                           | 0.000420813 | 0.377989704 |
| cg10950251 |                                           | 0.002321262 | 0.377950237 |
| cg06825512 | APCDD1                                    | 0.004405484 | 0.377883791 |



|            |                                        |             |             |
|------------|----------------------------------------|-------------|-------------|
| cg06366374 | LOC285780                              | 0.000420813 | 0.377877251 |
| cg18761976 | SV2B;SV2B                              | 0.003185744 | 0.377875719 |
| cg18176723 | PPCDC                                  | 0.000420813 | 0.377729463 |
| cg10717869 | SLC41A1                                | 0.000420813 | 0.377646909 |
| cg19862242 | TNFAIP3                                | 0.002321262 | 0.37764115  |
| cg21518332 |                                        | 0.000420813 | 0.377609513 |
| cg21031917 | KHDRBS2                                | 0.002321262 | 0.377597811 |
| cg01950511 | TRAF3IP1;TRAF3IP1                      | 0.001038267 | 0.3775944   |
| cg07778180 | CCL4L1;CCL4L2                          | 0.002321262 | 0.377533476 |
| cg10541534 | SETD7                                  | 0.000420813 | 0.377529727 |
| cg09686308 | CIB3                                   | 0.000420813 | 0.377524451 |
| cg16283183 | LIMD1                                  | 0.000636165 | 0.377495937 |
| cg19306970 | HLX                                    | 0.000420813 | 0.377488829 |
| cg19078067 | SDK2                                   | 0.000420813 | 0.377440973 |
| cg07337598 | ANXA9                                  | 0.000636165 | 0.377427778 |
| cg08324090 | ACAP1                                  | 0.002321262 | 0.377300807 |
| cg00925339 | NT5E                                   | 0.000420813 | 0.377293454 |
| cg12355794 | SLC22A13                               | 0.000636165 | 0.377254747 |
| cg18303397 | IFT122;IFT122;MBD4;IFT122;IFT122       | 0.001569481 | 0.37725076  |
| cg22855764 | TANC1;TANC1                            | 0.000420813 | 0.377222612 |
| cg22566142 | LNPEP;LNPEP                            | 0.000420813 | 0.377094534 |
| cg17855595 | ZNF692;ZNF692                          | 0.000636165 | 0.376975598 |
| cg17974145 | CUX1;CUX1;CUX1                         | 0.000420813 | 0.3769099   |
| cg14873515 | NDST1                                  | 0.000420813 | 0.376897916 |
| cg12308346 | MAML3                                  | 0.000420813 | 0.376877646 |
| cg14231959 | ARHGEF10                               | 0.005790932 | 0.376840807 |
| cg06821871 | CBFA2T3;CBFA2T3                        | 0.000420813 | 0.376824731 |
| cg27196880 | PTRF                                   | 0.002321262 | 0.376748455 |
| cg13553662 |                                        | 0.000636165 | 0.376691286 |
| cg04257752 | C21orf29;KRTAP12-3                     | 0.001569481 | 0.376673154 |
| cg13474692 | MGMT                                   | 0.002321262 | 0.376658776 |
| cg00668519 | VGLL4;ATG7;VGLL4;ATG7;VGLL4;ATG7;VGLL4 | 0.002321262 | 0.376529498 |
| cg08511772 | CDC42EP1                               | 0.000420813 | 0.376428875 |
| cg14827643 | RGS12;RGS12                            | 0.000420813 | 0.37636471  |
| cg16215084 | DDR1;DDR1                              | 0.000636165 | 0.376221489 |
| cg15765353 |                                        | 0.000420813 | 0.376159124 |
| cg04044203 | ESAM                                   | 0.000420813 | 0.376068519 |
| cg13849419 | TJP2;TJP2;TJP2;TJP2                    | 0.000420813 | 0.376011096 |
| cg06789500 | MAD1L1;MAD1L1;MAD1L1                   | 0.001038267 | 0.375947406 |
| cg02322400 | MAML2                                  | 0.000420813 | 0.375945086 |
| cg12313149 |                                        | 0.003185744 | 0.375850161 |
| cg01008894 | RGS12;RGS12                            | 0.000420813 | 0.37567717  |
| cg10520790 | PROM1;PROM1;PROM1;PROM1;PROM1;PROM1;   | 0.000420813 | 0.375645046 |
| cg14918082 | KCNAB3                                 | 0.007567702 | 0.375590203 |
| cg10117599 | PRKAR1B;PRKAR1B;PRKAR1B;PRKAR1B;PRKAR  | 0.005790932 | 0.375314033 |
| cg08400424 | ARHGAP26;ARHGAP26                      | 0.000420813 | 0.375261466 |
| cg23630423 | RTN4RL1                                | 0.000420813 | 0.375261353 |
| cg17228105 | ERG;ERG;ERG;ERG                        | 0.000420813 | 0.375240867 |
| cg18103836 |                                        | 0.000420813 | 0.37520498  |
| cg11194613 | CTTN;CTTN                              | 0.004405484 | 0.375178428 |
| cg01944288 | NTNG2                                  | 0.000420813 | 0.375140818 |
| cg04134235 | FAM49A                                 | 0.001569481 | 0.375123138 |
| cg13300580 | SLC9A1                                 | 0.000420813 | 0.375084578 |
| cg02057681 | CHL1                                   | 0.000420813 | 0.375026159 |
| cg02142900 |                                        | 0.000420813 | 0.37501572  |
| cg18601596 | KCNK16;KCNK16;KCNK17;KCNK16;KCNK17     | 0.001038267 | 0.375000685 |
| cg26675785 | ABCC1;ABCC1;ABCC1;ABCC1;ABCC1          | 0.000420813 | 0.374996779 |
| cg08384322 | C16orf46;C16orf46                      | 0.002321262 | 0.374852106 |
| cg08915438 | FKBP5;LOC285847                        | 0.001038267 | 0.374814406 |

|            |                               |             |             |
|------------|-------------------------------|-------------|-------------|
| cg23736297 | RPTOR;RPTOR                   | 0.000420813 | 0.374805692 |
| cg27628849 | PHF17;PHF17                   | 0.000420813 | 0.374671582 |
| cg13816466 | LOC158376                     | 0.000420813 | 0.374656129 |
| cg10873171 | AEBP1                         | 0.000420813 | 0.37455963  |
| cg26955132 |                               | 0.001038267 | 0.374453737 |
| cg11313780 |                               | 0.000636165 | 0.374390222 |
| cg10738119 | YWHAG                         | 0.002321262 | 0.374372089 |
| cg07061368 | FKBP5;FKBP5;FKBP5;FKBP5       | 0.007567702 | 0.37428597  |
| cg00435173 | RAB5C;RAB5C                   | 0.002321262 | 0.374266563 |
| cg09341580 | GALR3                         | 0.000636165 | 0.374248494 |
| cg18747197 |                               | 0.002321262 | 0.374209145 |
| cg16596317 |                               | 0.000636165 | 0.374205534 |
| cg18181904 | PCTP;PCTP                     | 0.000420813 | 0.374179273 |
| cg12076102 | ICAM2;ICAM2;ICAM2;ICAM2;ICAM2 | 0.001569481 | 0.374153828 |
| cg18045102 | RFX8                          | 0.000420813 | 0.374147669 |
| cg22280671 | EFHA1                         | 0.003185744 | 0.374131251 |
| cg20300911 |                               | 0.000420813 | 0.373995698 |
| cg17850088 |                               | 0.002321262 | 0.373911018 |
| cg02918093 |                               | 0.000420813 | 0.373898153 |
| cg03994959 | LIG4;LIG4;LIG4;LIG4           | 0.005790932 | 0.373846446 |
| cg19317600 | ACOX3;ACOX3                   | 0.000636165 | 0.373837912 |
| cg03919657 | ACSF2                         | 0.001038267 | 0.373826559 |
| cg03123320 |                               | 0.001038267 | 0.373825752 |
| cg19009305 | ISG20                         | 0.000420813 | 0.373787713 |
| cg01466011 |                               | 0.002321262 | 0.373750357 |
| cg23606775 | CLSTN1;CLSTN1                 | 0.000420813 | 0.373706414 |
| cg07698793 |                               | 0.001038267 | 0.373600173 |
| cg02692177 |                               | 0.000420813 | 0.37353294  |
| cg14707053 | TAF8                          | 0.004405484 | 0.373345329 |
| cg05436845 | MAP3K11                       | 0.002321262 | 0.373289385 |
| cg11706849 | MGAT5                         | 0.002321262 | 0.373270636 |
| cg21078654 | TMOD3                         | 0.000420813 | 0.373145946 |
| cg11095743 |                               | 0.000420813 | 0.373074277 |
| cg08763351 | SPRR4                         | 0.001569481 | 0.373061837 |
| cg06312985 | RP9P                          | 0.005790932 | 0.373028523 |
| cg16951074 | BCL11A;BCL11A;BCL11A          | 0.005790932 | 0.372976475 |
| cg18702935 |                               | 0.000420813 | 0.372943153 |
| cg13526642 | AKAP2;PALM2-AKAP2;PALM2-AKAP2 | 0.000420813 | 0.372867557 |
| cg18465945 | PEMT;PEMT;PEMT                | 0.000636165 | 0.372735466 |
| cg26334358 |                               | 0.001569481 | 0.372520386 |
| cg20595271 | SH2B3                         | 0.000420813 | 0.372509101 |
| cg17404289 | MAD1L1;MAD1L1;MAD1L1          | 0.007567702 | 0.372398186 |
| cg09029902 | ZNF217;ZNF217                 | 0.000420813 | 0.372366605 |
| cg23112464 | TMCO3                         | 0.000420813 | 0.372356747 |
| cg04438064 | HDAC4                         | 0.000420813 | 0.372234416 |
| cg19384997 | CRYL1                         | 0.005790932 | 0.372195562 |
| cg26106921 |                               | 0.000420813 | 0.372173135 |
| cg06679089 | TNRC6B                        | 0.000420813 | 0.37216624  |
| cg05141988 | SCML4                         | 0.000420813 | 0.372154756 |
| cg22579224 | KIAA1199                      | 0.000420813 | 0.372036536 |
| cg18101488 |                               | 0.000420813 | 0.372023676 |
| cg01981433 | TNFAIP3                       | 0.000420813 | 0.371997407 |
| cg17238319 | RFTN1                         | 0.004405484 | 0.371995083 |
| cg12221864 | WDR43                         | 0.004405484 | 0.371859472 |
| cg17022488 |                               | 0.002321262 | 0.371853455 |
| cg02286857 | TTC7A                         | 0.000420813 | 0.371849788 |
| cg26747517 | ANKRD11                       | 0.000420813 | 0.371849696 |
| cg18564971 | SMURF1;SMURF1                 | 0.001038267 | 0.371819794 |
| cg20029153 | MYO18A;MYO18A                 | 0.001038267 | 0.371801359 |

|            |                                                |             |             |
|------------|------------------------------------------------|-------------|-------------|
| cg22521263 |                                                | 0.000420813 | 0.371705759 |
| cg15137213 | VPS53;VPS53                                    | 0.000420813 | 0.371641232 |
| cg21157904 | TRIM14;NANS                                    | 0.001038267 | 0.371627482 |
| cg19835040 | RTP3                                           | 0.000420813 | 0.37160289  |
| cg22250556 |                                                | 0.002321262 | 0.371594001 |
| cg22032626 | NCKAP5L                                        | 0.002321262 | 0.371456218 |
| cg15549075 | PRKCE                                          | 0.000420813 | 0.371436872 |
| cg01296705 | HRH2;HRH2                                      | 0.000420813 | 0.371390802 |
| cg04398156 |                                                | 0.002321262 | 0.371388011 |
| cg11704201 |                                                | 0.00961166  | 0.371304133 |
| cg15919833 | CAST;CAST;CAST;CAST;CAST;CAST;CAST;CAST        | 0.000466745 | 0.371297561 |
| cg24838825 |                                                | 0.002321262 | 0.371283251 |
| cg07986378 | ETV6                                           | 0.001569481 | 0.371259577 |
| cg05180258 | NUMB;NUMB;NUMB;NUMB                            | 0.004405484 | 0.37122621  |
| cg19445588 |                                                | 0.000636165 | 0.37114772  |
| cg23223330 |                                                | 0.000420813 | 0.371052862 |
| cg03796003 | KCTD5                                          | 0.00961166  | 0.370963896 |
| cg21130221 | KCNQ1;KCNQ1                                    | 0.000420813 | 0.370959294 |
| cg03004102 | CD34;CD34                                      | 0.001569481 | 0.37083842  |
| cg02854313 | CSGALNACT1;CSGALNACT1;CSGALNACT1               | 0.000636165 | 0.370741527 |
| cg00385956 | NPHP4                                          | 0.000420813 | 0.370646337 |
| cg14254562 | TLE1                                           | 0.000420813 | 0.370621298 |
| cg20341251 | WNT5B;WNT5B                                    | 0.000420813 | 0.370553045 |
| cg09595245 | SLC12A5                                        | 0.000420813 | 0.370497694 |
| cg15461663 |                                                | 0.001038267 | 0.370275639 |
| cg10330057 |                                                | 0.000420813 | 0.37025611  |
| cg13702370 |                                                | 0.000420813 | 0.370229657 |
| cg16303353 | CACNA1C;CACNA1C;CACNA1C;CACNA1C;CACNA1C        | 0.000420813 | 0.370228646 |
| cg07922513 | KCNAB2;KCNAB2                                  | 0.001569481 | 0.370222858 |
| cg08698943 |                                                | 0.005790932 | 0.370009121 |
| cg00870269 | LIPC                                           | 0.000420813 | 0.369799929 |
| cg13049432 | NCRNA00114;NCRNA00114                          | 0.000420813 | 0.369776543 |
| cg19678959 | TUBA8                                          | 0.000420813 | 0.369762546 |
| cg00569500 | TNFRSF8                                        | 0.000636165 | 0.369754513 |
| cg09408143 | RAB11FIP3;RAB11FIP3                            | 0.005790932 | 0.369675034 |
| cg08484560 | ATP11A;ATP11A                                  | 0.005790932 | 0.369665398 |
| cg19408207 | ZMAT3;ZMAT3                                    | 0.007567702 | 0.369576554 |
| cg02458141 | HS1BP3                                         | 0.000420813 | 0.369547974 |
| cg03606511 | BCL11A;BCL11A;BCL11A                           | 0.000420813 | 0.369504241 |
| cg21133433 |                                                | 0.000420813 | 0.369471416 |
| cg15431659 | C3orf21                                        | 0.001569481 | 0.369410868 |
| cg12224388 |                                                | 0.001569481 | 0.369358164 |
| cg22115465 | MAD1L1;MAD1L1;MAD1L1                           | 0.000636165 | 0.369316983 |
| cg13308743 |                                                | 0.00961166  | 0.369288369 |
| cg16586406 | TPM3                                           | 0.000420813 | 0.369256418 |
| cg02413938 | ESPNL                                          | 0.000420813 | 0.36918991  |
| cg21268658 | PTPRF;PTPRF                                    | 0.002321262 | 0.369100012 |
| cg14565014 | PLEKHG6                                        | 0.000420813 | 0.369048859 |
| cg17980404 | IGFBP4                                         | 0.000420813 | 0.369039353 |
| cg06634140 |                                                | 0.000420813 | 0.368918804 |
| cg19755813 | GEMIN4                                         | 0.000420813 | 0.368813996 |
| cg25578476 |                                                | 0.000420813 | 0.368792225 |
| cg08675117 | RFX2;RFX2                                      | 0.000636165 | 0.368767339 |
| cg10963218 | S100A13;S100A13;S100A13;S100A1;S100A13;S100A13 | 0.001038267 | 0.368747285 |
| cg27466999 | LMF1                                           | 0.001569481 | 0.368720535 |
| cg05575639 | CHD7                                           | 0.004405484 | 0.368575811 |
| cg20966270 |                                                | 0.001038267 | 0.368390262 |
| cg03153115 | GNG7                                           | 0.000420813 | 0.368272827 |
| cg20702417 | DNMT3A;DNMT3A;DNMT3A                           | 0.000420813 | 0.368170672 |

|            |                                         |             |             |
|------------|-----------------------------------------|-------------|-------------|
| cg18404811 |                                         | 0.002321262 | 0.368159692 |
| cg11419575 |                                         | 0.000420813 | 0.368078202 |
| cg20415945 | HDAC4                                   | 0.002321262 | 0.368061789 |
| cg15763670 | C10orf105;C10orf105;CDH23               | 0.000420813 | 0.368021873 |
| cg25343661 | VEGFA;VEGFA;VEGFA;VEGFA;VEGFA;VEGFA;VE  | 0.000420813 | 0.367967652 |
| cg05707116 | EIF2AK3                                 | 0.000420813 | 0.367920131 |
| cg20043649 |                                         | 0.007567702 | 0.367912864 |
| cg11505026 | PRKCE                                   | 0.000420813 | 0.367909166 |
| cg02319094 | P2RY6;P2RY6;P2RY6                       | 0.000420813 | 0.367906285 |
| cg07137429 |                                         | 0.000420813 | 0.367883947 |
| cg05758467 | HDAC4                                   | 0.002321262 | 0.367787863 |
| cg07491702 | CDAN1                                   | 0.007567702 | 0.367785549 |
| cg01155092 | TMEM100                                 | 0.002321262 | 0.367745763 |
| cg16163535 | SLC12A7                                 | 0.003185744 | 0.367677264 |
| cg22222461 | PGCP                                    | 0.000420813 | 0.367665086 |
| cg02830936 | MTMR9L                                  | 0.001038267 | 0.367608468 |
| cg22117819 |                                         | 0.000420813 | 0.367608432 |
| cg24917065 | SLC25A37                                | 0.000636165 | 0.367587807 |
| cg23472153 | MPRIP;MPRIP                             | 0.000420813 | 0.367557491 |
| cg18636739 | CSDA;CSDA                               | 0.002321262 | 0.367350343 |
| cg05774614 | RPTOR;RPTOR                             | 0.000420813 | 0.367335897 |
| cg15889847 | PLEKHG3                                 | 0.001569481 | 0.36732444  |
| cg02010760 |                                         | 0.000420813 | 0.367307218 |
| cg05568549 | CCND3;CCND3;CCND3;CCND3                 | 0.000420813 | 0.367302597 |
| cg13641778 | TMEM110                                 | 0.000420813 | 0.367193065 |
| cg24402667 | ARHGAP23                                | 0.002321262 | 0.367152358 |
| cg14124646 | HPS6                                    | 0.002321262 | 0.367145376 |
| cg03162506 |                                         | 0.000420813 | 0.367140444 |
| cg23893629 | LAX1;LAX1                               | 0.004405484 | 0.367113166 |
| cg03291548 |                                         | 0.000420813 | 0.367087801 |
| cg05248470 | LILRB2;LILRB2                           | 0.000420813 | 0.367078473 |
| cg09086087 | SLC12A4;SLC12A4;SLC12A4;SLC12A4;SLC12A4 | 0.000420813 | 0.367044409 |
| cg03892714 | SH3PXD2B                                | 0.000420813 | 0.36702964  |
| cg10186254 | NRXN3;NRXN3;NRXN3                       | 0.002629558 | 0.367026474 |
| cg05788080 | ITPRIP                                  | 0.005790932 | 0.367025948 |
| cg21244580 |                                         | 0.000636165 | 0.366975809 |
| cg21422361 | MAD1L1;MAD1L1;MAD1L1                    | 0.002321262 | 0.366889167 |
| cg02167757 | SIAH1;SIAH1                             | 0.000420813 | 0.366856591 |
| cg13524037 | HLA-DMB                                 | 0.000420813 | 0.36665887  |
| cg05903720 |                                         | 0.002321262 | 0.366654804 |
| cg02087985 | SNX27                                   | 0.001038267 | 0.366646309 |
| cg13880868 | GLE1;GLE1                               | 0.000420813 | 0.366500338 |
| cg21089050 | GAS7                                    | 0.000420813 | 0.366295076 |
| cg00153693 |                                         | 0.000420813 | 0.366276038 |
| cg02981163 |                                         | 0.000420813 | 0.366272448 |
| cg02744046 | LIPC                                    | 0.000636165 | 0.366252563 |
| cg00669330 | C2orf85                                 | 0.001038267 | 0.366007161 |
| cg20320472 | KDM2A;KDM2A                             | 0.000420813 | 0.365970579 |
| cg17511604 | ZHX2                                    | 0.000420813 | 0.365939556 |
| cg02652361 | MALAT1                                  | 0.000636165 | 0.365884662 |
| cg11346718 |                                         | 0.000420813 | 0.365850571 |
| cg11307565 | PXN;PXN                                 | 0.002321262 | 0.365792891 |
| cg11661914 | ADCY6                                   | 0.001038267 | 0.365753212 |
| cg02007534 |                                         | 0.002321262 | 0.365743681 |
| cg04409030 | SOCS2                                   | 0.000719053 | 0.365698848 |
| cg08324801 |                                         | 0.000420813 | 0.3656802   |
| cg10323962 | CA5A                                    | 0.001038267 | 0.365589448 |
| cg05874806 | MAP4K4;MAP4K4;MAP4K4                    | 0.000420813 | 0.365547417 |
| cg03121834 | PILRA;PILRA;PILRA                       | 0.000420813 | 0.365494609 |

|            |                                        |             |             |
|------------|----------------------------------------|-------------|-------------|
| cg26914296 | OIT3                                   | 0.000420813 | 0.365467809 |
| cg08002791 | GPR133                                 | 0.000420813 | 0.365378565 |
| cg07349815 |                                        | 0.000420813 | 0.365376283 |
| cg08628233 |                                        | 0.000420813 | 0.365323177 |
| cg25379762 | GAS7                                   | 0.000420813 | 0.36529301  |
| cg22806934 | UBASH3B                                | 0.000420813 | 0.365287759 |
| cg08859278 | ZAP70                                  | 0.000420813 | 0.365273992 |
| cg08371951 | SYNGAP1                                | 0.000420813 | 0.365215461 |
| cg10614445 | DNMT3A;DNMT3A;DNMT3A                   | 0.000420813 | 0.365124577 |
| cg11463380 | RGS12;RGS12;RGS12                      | 0.000420813 | 0.365116861 |
| cg23695222 |                                        | 0.000420813 | 0.365069818 |
| cg10196532 | RCBTB1                                 | 0.000636165 | 0.364949032 |
| cg23705979 | CDK6;CDK6                              | 0.000420813 | 0.364893385 |
| cg15157945 | NBEAL2                                 | 0.000420813 | 0.364820698 |
| cg18741277 | ZGLP1                                  | 0.000420813 | 0.364724261 |
| cg14037250 | BRD3                                   | 0.000636165 | 0.364720094 |
| cg08061598 | FYN;FYN                                | 0.004405484 | 0.364715826 |
| cg21487856 | SPTBN1;SPTBN1                          | 0.000420813 | 0.364707818 |
| cg26027052 |                                        | 0.000420813 | 0.364634491 |
| cg16704703 |                                        | 0.001569481 | 0.364573234 |
| cg08937107 |                                        | 0.000420813 | 0.36455776  |
| cg08553274 | KIAA1530                               | 0.001038267 | 0.364531264 |
| cg16671238 | CRYL1                                  | 0.000420813 | 0.364413515 |
| cg15775674 | CAPN3;CAPN3;CAPN3;CAPN3;CAPN3;CAPN3;CA | 0.002321262 | 0.364403284 |
| cg02217713 | PRKAR1B;PRKAR1B;PRKAR1B;PRKAR1B;PRKAR  | 0.004405484 | 0.364244049 |
| cg20909017 | ITGA5                                  | 0.000420813 | 0.36421113  |
| cg07366300 | B3GNT8                                 | 0.002629558 | 0.364119091 |
| cg06330289 |                                        | 0.000636165 | 0.36405211  |
| cg02023973 | CLCN7;CLCN7                            | 0.002321262 | 0.364023941 |
| cg22688566 | MYO18A;MYO18A                          | 0.000420813 | 0.364021747 |
| cg10687006 | FAM188B                                | 0.000636165 | 0.363962545 |
| cg06950683 | CBFA2T3                                | 0.000420813 | 0.36395665  |
| cg10547908 | FAM174B                                | 0.000420813 | 0.363855006 |
| cg18326562 | MAP2K6                                 | 0.000420813 | 0.363715908 |
| cg15731920 | LASP1                                  | 0.000420813 | 0.363710645 |
| cg05206789 | AFF1                                   | 0.000420813 | 0.363623785 |
| cg13525639 | SMURF1;SMURF1                          | 0.000420813 | 0.363543222 |
| cg12807187 | EIF4E3;EIF4E3;EIF4E3                   | 0.002321262 | 0.363528054 |
| cg09249101 |                                        | 0.000420813 | 0.363442684 |
| cg17884698 |                                        | 0.000420813 | 0.363434358 |
| cg01074955 | NPHP4                                  | 0.005790932 | 0.363406321 |
| cg10239022 | GPR133                                 | 0.000420813 | 0.363331448 |
| cg13577072 | KCNQ1;KCNQ1OT1;KCNQ1                   | 0.000420813 | 0.36332687  |
| cg17679427 | CREM;CREM;CREM;CREM;CREM;CREM;CREM;C   | 0.000420813 | 0.363319652 |
| cg21122199 | C17orf64                               | 0.000420813 | 0.363274595 |
| cg09060789 | LSP1                                   | 0.001569481 | 0.363126498 |
| cg00697095 | GRB7;GRB7                              | 0.007567702 | 0.363103034 |
| cg07264329 |                                        | 0.000420813 | 0.363102503 |
| cg09840122 | TMPO;TMPO;TMPO                         | 0.000420813 | 0.363054476 |
| cg07307994 |                                        | 0.003185744 | 0.362997156 |
| cg04900877 |                                        | 0.000420813 | 0.362986274 |
| cg04193065 |                                        | 0.003185744 | 0.362898982 |
| cg16902863 | SSPO                                   | 0.000420813 | 0.36287518  |
| cg24749385 |                                        | 0.000636165 | 0.362852848 |
| cg22040631 |                                        | 0.00961166  | 0.362770684 |
| cg18013792 | MAD1L1;MAD1L1;MAD1L1                   | 0.000420813 | 0.362754472 |
| cg04525441 | ADARB2                                 | 0.000420813 | 0.362718866 |
| cg00855461 | SIPA1L2                                | 0.000420813 | 0.362700848 |
| cg18166144 | PTPRE;PTPRE                            | 0.000420813 | 0.362637542 |

|            |                            |             |             |
|------------|----------------------------|-------------|-------------|
| cg21842959 | TSSC1                      | 0.001836098 | 0.362598913 |
| cg13714797 | KDM4C;KDM4C                | 0.000420813 | 0.36254549  |
| cg04964845 | PPM1A;PPM1A                | 0.002321262 | 0.362516079 |
| cg12973294 | SYNPO2;SYNPO2;SYNPO2       | 0.000420813 | 0.362512228 |
| cg04413853 | C17orf64                   | 0.001569481 | 0.362479703 |
| cg27296341 | IPCEF1;OPRM1;IPCEF1;IPCEF1 | 0.003185744 | 0.362454304 |
| cg12069540 | C10orf58;C10orf58          | 0.000420813 | 0.362417741 |
| cg14009440 | TMEM53                     | 0.000420813 | 0.362400434 |
| cg22992279 | RBPJ;RBPJ;RBPJ;RBPJ        | 0.000420813 | 0.362386754 |
| cg02448743 | KAZALD1                    | 0.000420813 | 0.362319028 |
| cg09358725 | LMO2                       | 0.002321262 | 0.362271358 |
| cg09075743 | MAD1L1;MAD1L1;MAD1L1       | 0.000636165 | 0.362222567 |
| cg17339440 | RAB11FIP1;RAB11FIP1        | 0.000420813 | 0.362220676 |
| cg24425727 | CDKN1A;CDKN1A              | 0.000636165 | 0.36219728  |
| cg25940202 |                            | 0.000420813 | 0.362193204 |
| cg07272042 |                            | 0.000420813 | 0.362181043 |
| cg13345558 | PRKAA1;PRKAA1              | 0.000420813 | 0.362160201 |
| cg06716730 | DUSP14                     | 0.001173833 | 0.362075718 |
| cg26130864 | SLC4A11                    | 0.000636165 | 0.362030382 |
| cg10505658 | CCDC57                     | 0.001038267 | 0.362014824 |
| cg08044454 | ELMO1;ELMO1;ELMO1;ELMO1    | 0.000420813 | 0.36199625  |
| cg23453353 |                            | 0.000420813 | 0.361914935 |
| cg13260278 | RGS10;RGS10                | 0.000636165 | 0.361818833 |
| cg17389988 | C7orf10                    | 0.001038267 | 0.361729761 |
| cg23173586 | PNP                        | 0.000420813 | 0.361712857 |
| cg17547295 | CLINT1                     | 0.00961166  | 0.361637722 |
| cg08873568 | ARRDC5                     | 0.001569481 | 0.361617269 |
| cg16014060 | RAD51L1                    | 0.000420813 | 0.361602546 |
| cg26464796 | DHX29                      | 0.00961166  | 0.361598829 |
| cg07011110 | BTN1A1                     | 0.001569481 | 0.361476467 |
| cg03663984 | LMOD3                      | 0.001038267 | 0.361398598 |
| cg08355863 |                            | 0.000636165 | 0.361361054 |
| cg08808812 | CMIP;CMIP                  | 0.000420813 | 0.361358944 |
| cg17593384 | AFF1;AFF1                  | 0.001569481 | 0.361254924 |
| cg20257866 | WISP1;WISP1                | 0.000420813 | 0.361200062 |
| cg03126694 | LPAR6;LPAR6;RB1            | 0.000420813 | 0.361103993 |
| cg02464665 | MIR1182;FAM89A             | 0.000420813 | 0.361091013 |
| cg21697512 | CD34;CD34                  | 0.000420813 | 0.361086429 |
| cg17805199 | H6PD                       | 0.000420813 | 0.361071434 |
| cg18278694 | CEP350                     | 0.00961166  | 0.361001255 |
| cg15468423 | GNG7                       | 0.000420813 | 0.360825141 |
| cg10097651 |                            | 0.000420813 | 0.36079247  |
| cg08822136 |                            | 0.003185744 | 0.360720823 |
| cg11580897 |                            | 0.000420813 | 0.360719284 |
| cg00145118 | GNPDA1                     | 0.000420813 | 0.360604485 |
| cg23022999 | RINL                       | 0.000636165 | 0.360556663 |
| cg00848594 | C10orf25;ZNF22             | 0.000420813 | 0.360545023 |
| cg01859228 | DAPK2                      | 0.000420813 | 0.36049881  |
| cg11494437 | BTD                        | 0.000420813 | 0.360387883 |
| cg01866518 | PXN;PXN;PXN                | 0.000420813 | 0.360327336 |
| cg15436606 | AFF1                       | 0.000420813 | 0.360279628 |
| cg00258779 |                            | 0.002321262 | 0.360256728 |
| cg08410533 | DIP2C                      | 0.000420813 | 0.360126169 |
| cg15033511 |                            | 0.007567702 | 0.359977853 |
| cg19588519 |                            | 0.002321262 | 0.359952596 |
| cg06447341 |                            | 0.000420813 | 0.359928694 |
| cg20715953 |                            | 0.000420813 | 0.359855877 |
| cg10359807 | USP7                       | 0.000420813 | 0.359848818 |
| cg01028142 | CMPK2                      | 0.000420813 | 0.359810687 |

|            |                                            |             |             |
|------------|--------------------------------------------|-------------|-------------|
| cg19477205 | MIR154                                     | 0.007567702 | 0.359800777 |
| cg25165199 | RCBTB2                                     | 0.000420813 | 0.359754311 |
| cg17442852 | SLC43A2                                    | 0.000420813 | 0.359735114 |
| cg12883617 | UBASH3B                                    | 0.000420813 | 0.359698145 |
| cg13879523 | PDE9A;PDE9A;PDE9A;PDE9A;PDE9A;PDE9A;PDE9A  | 0.000420813 | 0.359655678 |
| cg11070818 |                                            | 0.000420813 | 0.359618737 |
| cg20504474 |                                            | 0.001569481 | 0.359569812 |
| cg16469223 | THPO                                       | 0.000420813 | 0.359449001 |
| cg17692230 |                                            | 0.003613402 | 0.359443018 |
| cg22257056 | CMTM7;CMTM7                                | 0.000420813 | 0.359412782 |
| cg22029476 | LILRA1                                     | 0.000420813 | 0.359350305 |
| cg11937508 | GPR1;GPR1                                  | 0.001569481 | 0.359333566 |
| cg13958199 | NEK6;NEK6;NEK6                             | 0.000420813 | 0.359279015 |
| cg09380069 | PCTP;PCTP                                  | 0.001038267 | 0.359171608 |
| cg27172287 |                                            | 0.002321262 | 0.359134292 |
| cg09315264 | STK40                                      | 0.000420813 | 0.359112293 |
| cg11082447 | PHF7;PHF7                                  | 0.000420813 | 0.359034264 |
| cg06380691 | RASA3                                      | 0.005790932 | 0.358941551 |
| cg23100365 |                                            | 0.000420813 | 0.358889075 |
| cg16125214 | PIK3CD                                     | 0.000420813 | 0.358881766 |
| cg22575127 | MGMT                                       | 0.000420813 | 0.358827909 |
| cg19858280 | CCDC127                                    | 0.000420813 | 0.35879665  |
| cg08930843 | ZNF438;ZNF438;ZNF438;ZNF438;ZNF438;ZNF438  | 0.004997918 | 0.358743382 |
| cg23840027 | EPB41;EPB41;EPB41;EPB41;EPB41              | 0.001038267 | 0.358738279 |
| cg09115473 | TRIO                                       | 0.000636165 | 0.358695678 |
| cg15490880 | PKLR;PKLR                                  | 0.000466745 | 0.358630248 |
| cg03841638 |                                            | 0.000636165 | 0.358593918 |
| cg19602452 | SPRR4                                      | 0.000719053 | 0.358543554 |
| cg18057306 | MIPEP                                      | 0.000420813 | 0.3585092   |
| cg07456815 | XKR4                                       | 0.001569481 | 0.358358508 |
| cg12564151 | DENND3                                     | 0.000420813 | 0.358334587 |
| cg15252509 | MALT1;MALT1                                | 0.003185744 | 0.35830199  |
| cg22443940 |                                            | 0.000636165 | 0.358295125 |
| cg18842187 | ITPR3                                      | 0.000420813 | 0.358277954 |
| cg01922613 | ABCA4                                      | 0.000420813 | 0.358197993 |
| cg19584649 | ESYT2                                      | 0.005790932 | 0.358188565 |
| cg07223106 | PCNXL2                                     | 0.002321262 | 0.358165377 |
| cg01328473 | PXDN                                       | 0.000420813 | 0.358145509 |
| cg24570346 |                                            | 0.004405484 | 0.358137054 |
| cg21121258 |                                            | 0.000420813 | 0.358119812 |
| cg00130947 | LAMA2;LAMA2                                | 0.003185744 | 0.358118335 |
| cg10558740 | FLJ22536                                   | 0.000420813 | 0.35804491  |
| cg09773897 | NFIC                                       | 0.000420813 | 0.357972316 |
| cg16460860 |                                            | 0.003185744 | 0.357947625 |
| cg06151145 | SLAIN2                                     | 0.000420813 | 0.357921619 |
| cg06017212 | SLC43A2                                    | 0.000420813 | 0.357891454 |
| cg25633383 | EHMT2;EHMT2                                | 0.000420813 | 0.357846241 |
| cg19597449 | CCL25                                      | 0.002321262 | 0.357770952 |
| cg05057352 | XYLT1                                      | 0.001569481 | 0.357757349 |
| cg21213853 | GRM2;GRM2                                  | 0.00961166  | 0.357740699 |
| cg00861207 | ABLIM2;ABLIM2;ABLIM2;ABLIM2;ABLIM2;ABLIM2; | 0.000636165 | 0.357645806 |
| cg21044968 | TRAF3IP2;TRAF3IP2;TRAF3IP2;TRAF3IP2        | 0.000636165 | 0.357590043 |
| cg06678005 |                                            | 0.000420813 | 0.357566297 |
| cg17331950 |                                            | 0.000420813 | 0.35743718  |
| cg04767507 | ZMIZ1                                      | 0.000420813 | 0.35742483  |
| cg06469955 | RPTOR;RPTOR                                | 0.002321262 | 0.357346428 |
| cg05924882 |                                            | 0.001569481 | 0.357295347 |
| cg25727952 | CRYL1                                      | 0.000420813 | 0.357256503 |
| cg19273668 |                                            | 0.000420813 | 0.357118622 |

|            |                             |             |             |
|------------|-----------------------------|-------------|-------------|
| cg21008363 | POM121C                     | 0.001569481 | 0.357100918 |
| cg06061966 | DGKZ;DGKZ                   | 0.002321262 | 0.357062005 |
| cg13630239 | RRP12;RRP12                 | 0.000636165 | 0.357034281 |
| cg07912766 | SMAD2;SMAD2                 | 0.001038267 | 0.356911892 |
| cg26065247 |                             | 0.000420813 | 0.356869375 |
| cg27175112 |                             | 0.004405484 | 0.356843921 |
| cg17578539 | HRH2                        | 0.008237556 | 0.356761389 |
| cg20748132 |                             | 0.001038267 | 0.356736122 |
| cg23924526 | PRKCE                       | 0.001569481 | 0.356721842 |
| cg09802610 | NPHP4                       | 0.000420813 | 0.356713862 |
| cg09631880 | CRADD                       | 0.000420813 | 0.356651663 |
| cg01618697 |                             | 0.00961166  | 0.356626414 |
| cg02002247 | SLC27A1                     | 0.000636165 | 0.356596364 |
| cg08043998 | KDM2B;KDM2B                 | 0.000420813 | 0.356593777 |
| cg08844900 | PLXND1                      | 0.000420813 | 0.356588791 |
| cg07438246 | SLC6A6;SLC6A6;SLC6A6        | 0.000420813 | 0.356537997 |
| cg20731819 | ADARB2                      | 0.000532358 | 0.356515101 |
| cg04880657 |                             | 0.000420813 | 0.356510218 |
| cg26244225 | APOLD1;APOLD1               | 0.000420813 | 0.35631091  |
| cg00565090 | SNORD23;GLTSCR2             | 0.001569481 | 0.356181737 |
| cg08371223 | SMPD3                       | 0.001038267 | 0.356172831 |
| cg11466449 |                             | 0.000420813 | 0.356150699 |
| cg18721397 | SUB1                        | 0.001038267 | 0.356112094 |
| cg16173529 | MSRA;MSRA;MSRA              | 0.000420813 | 0.356053508 |
| cg21197336 |                             | 0.000420813 | 0.356046389 |
| cg05292082 | TIAM1                       | 0.000420813 | 0.356010677 |
| cg23490396 | LASS6                       | 0.000636165 | 0.355950622 |
| cg13758310 | LETM1                       | 0.001038267 | 0.355935343 |
| cg24131359 | CPM                         | 0.000420813 | 0.355928797 |
| cg26463496 |                             | 0.000636165 | 0.355821428 |
| cg27333269 | EFHD2                       | 0.000420813 | 0.355737084 |
| cg20732160 | PFKFB4                      | 0.000420813 | 0.355715158 |
| cg02960418 | PDGFA;PDGFA                 | 0.000636165 | 0.355699316 |
| cg02676052 | LCP2                        | 0.005790932 | 0.35563745  |
| cg18447299 | DIAPH1;DIAPH1               | 0.001038267 | 0.355623699 |
| cg17820022 | PLCH2                       | 0.001569481 | 0.3554996   |
| cg02345399 |                             | 0.002321262 | 0.355482883 |
| cg08082507 | GTF2IRD2P                   | 0.000420813 | 0.355467016 |
| cg26405097 | JARID2                      | 0.002321262 | 0.355460086 |
| cg07512993 | TK2                         | 0.001038267 | 0.35544878  |
| cg26974444 | SNX29                       | 0.002321262 | 0.355394793 |
| cg12877853 | PTPRN2;PTPRN2;MIR595;PTPRN2 | 0.000420813 | 0.355384235 |
| cg22614400 | GIGYF1                      | 0.000636165 | 0.355316728 |
| cg21593835 | MYLK;MYLK;MYLK;MYLK         | 0.001569481 | 0.355300051 |
| cg20944379 | IL24;IL24                   | 0.000420813 | 0.355228316 |
| cg22164891 | ZNF217                      | 0.000420813 | 0.355226152 |
| cg22945666 |                             | 0.000420813 | 0.355219593 |
| cg23926598 |                             | 0.001569481 | 0.355190178 |
| cg15246989 | PLXDC1                      | 0.000636165 | 0.355153686 |
| cg15664905 | PHLDB3                      | 0.000420813 | 0.355144699 |
| cg04936619 | C17orf75                    | 0.000420813 | 0.355129238 |
| cg22014983 | MAP4K3                      | 0.000420813 | 0.355087712 |
| cg09946870 | DENND3                      | 0.000420813 | 0.355063921 |
| cg00204976 |                             | 0.000420813 | 0.354998003 |
| cg25775449 | LTB4R;LTB4R;CIDEB           | 0.000420813 | 0.354838551 |
| cg05217983 | RUNX2;RUNX2;RUNX2           | 0.005790932 | 0.35478676  |
| cg10247711 | WDR25;WDR25                 | 0.002321262 | 0.354770116 |
| cg00077838 |                             | 0.00961166  | 0.354761637 |
| cg24914483 |                             | 0.007567702 | 0.3547468   |



|            |                      |             |             |
|------------|----------------------|-------------|-------------|
| cg09126279 |                      | 0.000420813 | 0.354662033 |
| cg15445722 | FAM71D               | 0.000636165 | 0.35461088  |
| cg01514033 |                      | 0.002321262 | 0.354556034 |
| cg06527166 | HIVEP3;HIVEP3        | 0.000420813 | 0.354551289 |
| cg27480819 | SOX5;SOX5;SOX5       | 0.003185744 | 0.354485153 |
| cg00522231 | ITGB1BP1;ITGB1BP1    | 0.001038267 | 0.354345936 |
| cg04207746 |                      | 0.00961166  | 0.354288158 |
| cg09140232 |                      | 0.000420813 | 0.35428132  |
| cg22689323 | GML                  | 0.000420813 | 0.354271073 |
| cg18693985 | CPEB4                | 0.00961166  | 0.354227916 |
| cg09256413 | NEGR1                | 0.000636165 | 0.354221293 |
| cg16691158 |                      | 0.000420813 | 0.354219164 |
| cg13201297 | LINGO4;LINGO4        | 0.000636165 | 0.354192697 |
| cg02690117 |                      | 0.000636165 | 0.354052101 |
| cg24877842 | TRAK1;TRAK1          | 0.000420813 | 0.354047633 |
| cg07426634 |                      | 0.002321262 | 0.353957944 |
| cg19282952 |                      | 0.005790932 | 0.353942847 |
| cg11525409 |                      | 0.001038267 | 0.353921739 |
| cg19699682 |                      | 0.002321262 | 0.353877297 |
| cg12279175 |                      | 0.000420813 | 0.353871504 |
| cg08850675 | DAGLB;DAGLB          | 0.000420813 | 0.353870494 |
| cg00432953 |                      | 0.004405484 | 0.353826118 |
| cg04203702 | MIR572               | 0.000420813 | 0.353750628 |
| cg03771580 | OR5A2                | 0.000420813 | 0.353722568 |
| cg16706546 | IGF2BP2;IGF2BP2      | 0.003613402 | 0.353699171 |
| cg03652336 | MAML3                | 0.000420813 | 0.353663744 |
| cg00981060 |                      | 0.00657282  | 0.353634686 |
| cg12614529 | MND1                 | 0.000420813 | 0.353589829 |
| cg22546748 |                      | 0.000420813 | 0.353548645 |
| cg04740898 | BZRAP1;BZRAP1        | 0.000420813 | 0.353411759 |
| cg07720334 | DNMT3A;DNMT3A;DNMT3A | 0.000420813 | 0.35336601  |
| cg11552868 | ETS1                 | 0.000420813 | 0.353359711 |
| cg09863136 | SH2B2                | 0.000636165 | 0.353294122 |
| cg17023203 | ADARB2               | 0.000420813 | 0.353272092 |
| cg08220149 | NDE1;NDE1            | 0.000420813 | 0.353243566 |
| cg23072629 | PER2                 | 0.000420813 | 0.353239331 |
| cg26585899 | ATXN1L;ZNF821        | 0.005790932 | 0.353203835 |
| cg18651347 | AUTS2;AUTS2          | 0.002321262 | 0.353121362 |
| cg10730398 |                      | 0.000420813 | 0.353073819 |
| cg18338142 |                      | 0.000636165 | 0.352937783 |
| cg02403929 | RPTOR;RPTOR          | 0.004405484 | 0.352920332 |
| cg13633625 |                      | 0.00961166  | 0.352826282 |
| cg17150663 | KCP;KCP              | 0.002321262 | 0.352726941 |
| cg06396119 |                      | 0.002321262 | 0.352715016 |
| cg07184423 | REPS1;REPS1          | 0.001038267 | 0.352691007 |
| cg17499212 | KCNAB2;KCNAB2        | 0.000636165 | 0.352614349 |
| cg24897506 |                      | 0.000420813 | 0.352544562 |
| cg26662512 | MAD1L1;MAD1L1;MAD1L1 | 0.000420813 | 0.352504203 |
| cg24486958 |                      | 0.000636165 | 0.35248144  |
| cg13836518 | CORO2A;CORO2A        | 0.000420813 | 0.352458992 |
| cg00797286 |                      | 0.000420813 | 0.352423357 |
| cg24606533 | PPAP2B;PPAP2B        | 0.004405484 | 0.352400856 |
| cg22065514 | COL7A1;UCN2          | 0.00961166  | 0.352374468 |
| cg02765962 | HRH2;HRH2            | 0.001038267 | 0.35229225  |
| cg22141235 |                      | 0.000420813 | 0.352291589 |
| cg00771722 | IL3                  | 0.000420813 | 0.352254363 |
| cg03071793 | LITAF                | 0.000420813 | 0.352239949 |
| cg02516957 |                      | 0.007567702 | 0.352223886 |
| cg17351376 | CD248;CD248          | 0.000466745 | 0.352208418 |

|            |                                            |             |             |
|------------|--------------------------------------------|-------------|-------------|
| cg10991454 | LCLAT1;LCLAT1                              | 0.000420813 | 0.352065022 |
| cg17438457 |                                            | 0.000420813 | 0.35204879  |
| cg01471006 | FAM190B                                    | 0.000420813 | 0.352019779 |
| cg11505048 | RGL1;APOBEC4                               | 0.002321262 | 0.35187407  |
| cg21227325 | PCSK5                                      | 0.003185744 | 0.351829472 |
| cg06363243 | IFT140                                     | 0.007567702 | 0.351795261 |
| cg15245051 | APOL3;APOL3                                | 0.000466745 | 0.351762408 |
| cg17587986 | DIP2C                                      | 0.000420813 | 0.351751576 |
| cg09206294 | MAPKBP1;MAPKBP1                            | 0.004405484 | 0.351730746 |
| cg25962657 |                                            | 0.001038267 | 0.351725659 |
| cg01598007 | DUSP27                                     | 0.000420813 | 0.351703924 |
| cg24144574 | PRKAR1B;PRKAR1B;PRKAR1B;PRKAR1B;PRKAR1B    | 0.004405484 | 0.351568015 |
| cg16012294 | MAD1L1;MAD1L1;MAD1L1                       | 0.000420813 | 0.351566847 |
| cg08273360 |                                            | 0.000420813 | 0.351554173 |
| cg25278786 | GUK1;GUK1;GUK1                             | 0.00961166  | 0.351429297 |
| cg20681184 | PIK3CD                                     | 0.000420813 | 0.351379373 |
| cg09364733 | PDS5B                                      | 0.000420813 | 0.351379024 |
| cg27229664 | KIAA0513                                   | 0.000636165 | 0.351307657 |
| cg09286367 | MIR589;FBXL18                              | 0.005790932 | 0.351291759 |
| cg22396119 |                                            | 0.007567702 | 0.351196082 |
| cg00580752 | RNU5E;RNU5D;ACOT12                         | 0.000420813 | 0.351116001 |
| cg24027780 | LOC728743                                  | 0.001038267 | 0.351088682 |
| cg25937598 | CALHM3                                     | 0.000420813 | 0.351074691 |
| cg17990365 | IFITM3                                     | 0.004405484 | 0.351052689 |
| cg13051249 |                                            | 0.000420813 | 0.351040593 |
| cg11015768 | ST3GAL5                                    | 0.000420813 | 0.350880267 |
| cg15704521 | GNA12                                      | 0.002321262 | 0.350852944 |
| cg09267188 | PTDSS1                                     | 0.002321262 | 0.350792717 |
| cg25213720 | MXD3;MXD3                                  | 0.000636165 | 0.350728896 |
| cg12774454 | ABLIM2;ABLIM2;ABLIM2;ABLIM2;ABLIM2;ABLIM2; | 0.000420813 | 0.350696877 |
| cg19040266 | SLC22A5                                    | 0.000420813 | 0.350683223 |
| cg26692202 |                                            | 0.000420813 | 0.350662571 |
| cg26873754 | FUCA1                                      | 0.000420813 | 0.350516857 |
| cg03068346 | PFKP                                       | 0.002321262 | 0.350463376 |
| cg05928448 |                                            | 0.000420813 | 0.35039651  |
| cg01283625 |                                            | 0.001038267 | 0.35038004  |
| cg00555420 | TAPT1                                      | 0.002321262 | 0.350355991 |
| cg05785753 | NADSYN1                                    | 0.000420813 | 0.35027744  |
| cg25758828 | PAX8;PAX8;PAX8;PAX8;PAX8;LOC440839         | 0.007567702 | 0.350223023 |
| cg08784966 | TBC1D22B                                   | 0.003185744 | 0.350117537 |
| cg27587780 | IRF1                                       | 0.004405484 | 0.350105103 |
| cg08421051 | LOC338799                                  | 0.000420813 | 0.3500135   |
| cg23089445 |                                            | 0.002321262 | 0.349984304 |
| cg02549595 | IRF8                                       | 0.001038267 | 0.349937597 |
| cg24770256 | FOXK2                                      | 0.000636165 | 0.349919984 |
| cg01186212 | ANK3                                       | 0.000420813 | 0.349871635 |
| cg07875068 |                                            | 0.00961166  | 0.349839213 |
| cg16145324 | MAPK14;MAPK14;MAPK14;MAPK14                | 0.002629558 | 0.349722907 |
| cg03095773 | RFX8                                       | 0.000420813 | 0.349700341 |
| cg26328150 | TRAPPC9;TRAPPC9                            | 0.001038267 | 0.349672484 |
| cg00061520 | ADCY9                                      | 0.000636165 | 0.349658112 |
| cg22720761 |                                            | 0.003185744 | 0.349646609 |
| cg17301987 | FARS2                                      | 0.000420813 | 0.349620611 |
| cg18802332 | WISP1;WISP1                                | 0.000636165 | 0.349575134 |
| cg14714222 | PREX1                                      | 0.001038267 | 0.349555231 |
| cg18052528 | TNIK;TNIK;TNIK;TNIK;TNIK;TNIK;TNIK         | 0.000420813 | 0.349488284 |
| cg19193595 | SMAD3                                      | 0.000636165 | 0.349219849 |
| cg03980250 |                                            | 0.001569481 | 0.349182366 |
| cg15855924 | ANKRD10                                    | 0.002321262 | 0.349148293 |

|            |                                         |             |             |
|------------|-----------------------------------------|-------------|-------------|
| cg20806296 |                                         | 0.000420813 | 0.349113384 |
| cg16633925 | PALM;PALM                               | 0.001038267 | 0.349068516 |
| cg00478326 |                                         | 0.000420813 | 0.348993544 |
| cg04868238 | FLJ14107;BIN3                           | 0.002321262 | 0.348956589 |
| cg16814786 | NCOA4;NCOA4;NCOA4;NCOA4;NCOA4           | 0.000420813 | 0.348946866 |
| cg04041639 | TBCD                                    | 0.000420813 | 0.348889622 |
| cg01353670 |                                         | 0.00961166  | 0.348880877 |
| cg11383802 | DHCR7;DHCR7                             | 0.003185744 | 0.348746404 |
| cg03680873 |                                         | 0.005790932 | 0.348731685 |
| cg13870520 | SCARB2                                  | 0.001038267 | 0.3486699   |
| cg20128099 | PROSC                                   | 0.000636165 | 0.348647402 |
| cg01938023 | TMEM173                                 | 0.007567702 | 0.348604838 |
| cg11036656 |                                         | 0.005790932 | 0.348598084 |
| cg09570855 |                                         | 0.000420813 | 0.348591657 |
| cg25148705 |                                         | 0.000636165 | 0.348470659 |
| cg10973762 | DUT;DUT;DUT                             | 0.001173833 | 0.348458955 |
| cg07411165 | ZNF827                                  | 0.000420813 | 0.348451117 |
| cg24175188 | PXK                                     | 0.001569481 | 0.348193404 |
| cg10354512 | WISP1;WISP1                             | 0.000532358 | 0.348192544 |
| cg08878567 |                                         | 0.007567702 | 0.348152284 |
| cg01980810 | SPTBN2                                  | 0.004405484 | 0.348147267 |
| cg14595786 | SIGLEC9                                 | 0.002321262 | 0.348071758 |
| cg27244242 | LY6G5C                                  | 0.001038267 | 0.348016844 |
| cg14999931 | PFKFB3                                  | 0.002321262 | 0.347984401 |
| cg07810733 | HMGA2                                   | 0.002321262 | 0.347966777 |
| cg06606207 | C1orf201                                | 0.000420813 | 0.347923209 |
| cg14575356 | ARHGAP18                                | 0.004405484 | 0.347836811 |
| cg01577029 |                                         | 0.002321262 | 0.347809719 |
| cg06022607 |                                         | 0.000636165 | 0.347788535 |
| cg17173423 | MS4A3;MS4A3;MS4A3                       | 0.002321262 | 0.347737755 |
| cg16410524 | RCSD1                                   | 0.000420813 | 0.347714492 |
| cg11169848 | LOC100130987;CLCF1;CLCF1                | 0.001569481 | 0.347670612 |
| cg10054641 | TMEM71;TMEM71                           | 0.00961166  | 0.34757882  |
| cg21877355 | DYNC1H1                                 | 0.000636165 | 0.347577231 |
| cg03249011 |                                         | 0.000719053 | 0.34750574  |
| cg01527562 |                                         | 0.001038267 | 0.347505725 |
| cg03059247 | C8orf12;FAM167A                         | 0.000420813 | 0.347499965 |
| cg02578470 | MCM2                                    | 0.002321262 | 0.347478914 |
| cg01486260 | ITGAX                                   | 0.002321262 | 0.34744419  |
| cg17359975 | CTGF                                    | 0.000420813 | 0.347378729 |
| cg03879613 | GSTK1;GSTK1;GSTK1;GSTK1                 | 0.000420813 | 0.347368233 |
| cg14704780 | C6orf10                                 | 0.000420813 | 0.34730544  |
| cg11010561 |                                         | 0.003185744 | 0.347296774 |
| cg04884313 | DYNC1H1                                 | 0.000420813 | 0.347236489 |
| cg02989448 | SLC45A1                                 | 0.000420813 | 0.347190268 |
| cg26620147 | AVIL                                    | 0.007567702 | 0.347188202 |
| cg25518868 | DIAPH1;DIAPH1                           | 0.002321262 | 0.347179429 |
| cg01113811 | MAML2                                   | 0.000420813 | 0.347108503 |
| cg09806432 | SGSM2;SGSM2                             | 0.000420813 | 0.347106591 |
| cg27193519 | MGRN1;MGRN1;MGRN1;MGRN1                 | 0.000636165 | 0.347062323 |
| cg02921257 | XIRP1                                   | 0.001038267 | 0.346990974 |
| cg12587087 |                                         | 0.000420813 | 0.346968579 |
| cg08586913 | ARHGEF10                                | 0.000420813 | 0.346947037 |
| cg09676171 |                                         | 0.000420813 | 0.346843915 |
| cg04428662 | MFSD10;MFSD10                           | 0.000420813 | 0.346841517 |
| cg02719634 | SLC22A18AS;SLC22A18;SLC22A18AS;SLC22A18 | 0.000420813 | 0.346807856 |
| cg09363068 | COX19                                   | 0.007567702 | 0.346792207 |
| cg27570256 | LOC100270710                            | 0.002629558 | 0.346640246 |
| cg20242066 | LCT                                     | 0.005790932 | 0.346621566 |

|            |                                     |             |             |
|------------|-------------------------------------|-------------|-------------|
| cg16788865 |                                     | 0.007567702 | 0.346586896 |
| cg07535628 | EFCAB4A                             | 0.000420813 | 0.346576962 |
| cg01309569 | NPHP4                               | 0.000420813 | 0.346491877 |
| cg13618880 |                                     | 0.000420813 | 0.346488051 |
| cg03593471 |                                     | 0.000636165 | 0.346443371 |
| cg04564003 |                                     | 0.000420813 | 0.34640306  |
| cg02640147 | KCNIP1;KCNIP1;KCNIP1                | 0.00961166  | 0.346389015 |
| cg04051927 |                                     | 0.004405484 | 0.346374788 |
| cg16505891 | CCDC88C                             | 0.004405484 | 0.346267004 |
| cg03737424 |                                     | 0.002321262 | 0.346243716 |
| cg18885162 | FOXP4;FOXP4;FOXP4                   | 0.000420813 | 0.346204827 |
| cg23316191 |                                     | 0.000420813 | 0.346196234 |
| cg27052418 |                                     | 0.00961166  | 0.346162823 |
| cg06819373 | PTPRN2;PTPRN2;PTPRN2                | 0.000420813 | 0.346161837 |
| cg12032027 | ZNF217                              | 0.007567702 | 0.346127837 |
| cg01473602 | CSRP2                               | 0.001038267 | 0.346111138 |
| cg04887078 | ADARB2                              | 0.000420813 | 0.346089954 |
| cg22121647 | TMEM140                             | 0.004405484 | 0.346060995 |
| cg24995503 |                                     | 0.000420813 | 0.345918938 |
| cg20305578 |                                     | 0.000420813 | 0.345907158 |
| cg09418321 | DYRK4                               | 0.001038267 | 0.345853072 |
| cg23009067 | GNA12                               | 0.000466745 | 0.345843593 |
| cg10389644 | MAFK                                | 0.000420813 | 0.345839119 |
| cg08331754 |                                     | 0.000420813 | 0.345824084 |
| cg19038246 |                                     | 0.002321262 | 0.345775081 |
| cg13780428 |                                     | 0.001038267 | 0.345734071 |
| cg17628249 | C17orf64                            | 0.000420813 | 0.345694026 |
| cg05079191 | ZNF804B;MGC26647                    | 0.000636165 | 0.345651495 |
| cg25601446 | SCN4A                               | 0.000420813 | 0.345616295 |
| cg25375916 | SLC33A1                             | 0.002321262 | 0.345615513 |
| cg17594256 |                                     | 0.001038267 | 0.345597625 |
| cg02006142 | NSMCE2                              | 0.007567702 | 0.345540509 |
| cg00963171 | MAD1L1;MAD1L1;MAD1L1                | 0.000420813 | 0.345489684 |
| cg24154631 |                                     | 0.001569481 | 0.34545223  |
| cg16692439 | ASPHD2                              | 0.003185744 | 0.345410785 |
| cg02806322 | CMTM7;CMTM7                         | 0.000636165 | 0.345391748 |
| cg01487409 | FAM125B                             | 0.000420813 | 0.34536344  |
| cg10760299 | GATM                                | 0.005790932 | 0.345360585 |
| cg08823240 | MAP3K14                             | 0.003185744 | 0.345296477 |
| cg07568430 | CSF1;CSF1;CSF1;CSF1                 | 0.000420813 | 0.345294212 |
| cg19861623 | TTC7B                               | 0.000420813 | 0.345290273 |
| cg14833933 | CAPN3;CAPN3;CAPN3;CAPN3;CAPN3;CAPN3 | 0.000420813 | 0.345275299 |
| cg14378259 | ELFN2                               | 0.000420813 | 0.345266483 |
| cg24655669 | MAD1L1;MAD1L1;MAD1L1                | 0.007567702 | 0.345254291 |
| cg22143352 | JDP2;JDP2;JDP2;JDP2                 | 0.000636165 | 0.345252471 |
| cg12102181 | STAG1                               | 0.000420813 | 0.345250272 |
| cg25003697 |                                     | 0.000420813 | 0.345229927 |
| cg25343388 | MIR589;FBXL18                       | 0.000420813 | 0.345226068 |
| cg26910870 | PRKCZ;PRKCZ;PRKCZ                   | 0.001038267 | 0.345182519 |
| cg07346187 | ZC3H12D                             | 0.002321262 | 0.345181053 |
| cg12259379 | MCCD1                               | 0.000636165 | 0.345117629 |
| cg08476843 | STARD13;STARD13;STARD13;STARD13     | 0.000466745 | 0.345106646 |
| cg07935357 | PEMT;PEMT;PEMT                      | 0.004405484 | 0.345056397 |
| cg25444339 | HIP1                                | 0.000420813 | 0.345030339 |
| cg22900075 | CUEDC1                              | 0.001038267 | 0.344991052 |
| cg00318322 | GFOD2;GFOD2                         | 0.000420813 | 0.344950425 |
| cg27470486 | ACLY;ACLY                           | 0.001569481 | 0.344794192 |
| cg08250081 |                                     | 0.000420813 | 0.344773529 |
| cg09376583 |                                     | 0.000420813 | 0.344632903 |

|            |                               |             |             |
|------------|-------------------------------|-------------|-------------|
| cg09087961 | IGF2BP3                       | 0.002321262 | 0.344627585 |
| cg08492568 |                               | 0.002321262 | 0.344563608 |
| cg07585928 | DUSP15;TTLL9;DUSP15;DUSP15    | 0.000420813 | 0.344559181 |
| cg02253978 | CMTM2                         | 0.002321262 | 0.344525556 |
| cg08370173 |                               | 0.001038267 | 0.3443619   |
| cg26550214 |                               | 0.002321262 | 0.344294219 |
| cg04450606 | PGLYRP3                       | 0.001038267 | 0.344240809 |
| cg25251478 | DDR1;DDR1                     | 0.000420813 | 0.344203357 |
| cg10365563 | SP4                           | 0.000420813 | 0.344084007 |
| cg25221625 | CRYBB3                        | 0.004405484 | 0.344083388 |
| cg23647554 | ZBTB47                        | 0.004405484 | 0.344073191 |
| cg22542139 | PEMT;PEMT;PEMT                | 0.000636165 | 0.344063451 |
| cg00393373 | ZNF518B                       | 0.000420813 | 0.344037666 |
| cg08106792 | S100A6                        | 0.000420813 | 0.344019178 |
| cg10840361 | COG5;HBP1;COG5                | 0.000420813 | 0.344014894 |
| cg07647771 | USP10                         | 0.000420813 | 0.344004017 |
| cg05083852 | CMIP                          | 0.002321262 | 0.343977169 |
| cg19883066 | EXT1                          | 0.000466745 | 0.343967614 |
| cg05659486 |                               | 0.001038267 | 0.343814132 |
| cg20808613 | AEN                           | 0.001038267 | 0.343782526 |
| cg16180552 | IP6K2;IP6K2                   | 0.000636165 | 0.343758295 |
| cg08456420 | MACF1                         | 0.001569481 | 0.343732753 |
| cg26227523 | PSTPIP1                       | 0.000420813 | 0.343716058 |
| cg04234923 |                               | 0.000420813 | 0.343712661 |
| cg09924669 | IFT140;TMEM204                | 0.000420813 | 0.343702004 |
| cg03032595 | PDLIM7;PDLIM7;PDLIM7          | 0.001038267 | 0.343652178 |
| cg24090911 | AHRR                          | 0.002321262 | 0.34363939  |
| cg06650246 | MAPKAPK2;MAPKAPK2             | 0.000420813 | 0.343551337 |
| cg26462457 |                               | 0.001038267 | 0.343442563 |
| cg05474761 |                               | 0.002321262 | 0.343412024 |
| cg02400565 | CEACAM6                       | 0.000636165 | 0.343373955 |
| cg08316831 | HMG20A                        | 0.000420813 | 0.343339586 |
| cg23095729 | C22orf25;MIR185               | 0.002321262 | 0.343325437 |
| cg23167606 |                               | 0.005790932 | 0.34330712  |
| cg13578652 | UBASH3A;UBASH3A               | 0.001569481 | 0.343256593 |
| cg27606341 | FYB;FYB;FYB;FYB               | 0.007567702 | 0.343248504 |
| cg05863755 | TSPAN9;TSPAN9                 | 0.000420813 | 0.343193883 |
| cg14304236 |                               | 0.003185744 | 0.343120128 |
| cg15553397 | ST6GALNAC3;ST6GALNAC3         | 0.000420813 | 0.342978115 |
| cg13999433 | AKNA                          | 0.00961166  | 0.342898082 |
| cg13135241 |                               | 0.000420813 | 0.342607374 |
| cg23531734 | LOC100130691                  | 0.000636165 | 0.342593559 |
| cg18184935 | STAC2                         | 0.002321262 | 0.342427488 |
| cg19161559 | CUX1;CUX1;CUX1                | 0.003185744 | 0.342411814 |
| cg11421182 | BLCAP;BLCAP;BLCAP;BLCAP;BLCAP | 0.003185744 | 0.342389665 |
| cg16776035 |                               | 0.000420813 | 0.342384697 |
| cg25729060 | MPRIP;MPRIP                   | 0.000420813 | 0.342335016 |
| cg23732024 | LY96                          | 0.007567702 | 0.342252957 |
| cg26764198 | ZCCHC14                       | 0.000420813 | 0.342251825 |
| cg26562462 | TBC1D14;TBC1D14               | 0.002321262 | 0.34222684  |
| cg07470570 | AUTS2;AUTS2                   | 0.000420813 | 0.342131921 |
| cg17795540 | TRAPPC9;TRAPPC9               | 0.000636165 | 0.342023257 |
| cg22152446 | FRYL                          | 0.000420813 | 0.342001308 |
| cg20435097 | FAM53B                        | 0.001038267 | 0.341998972 |
| cg21674927 | IL1R2;IL1R2                   | 0.00961166  | 0.341980812 |
| cg00777315 | DCT;DCT                       | 0.001038267 | 0.341972437 |
| cg04922063 | CCNY;CCNY                     | 0.002321262 | 0.341969098 |
| cg19152255 |                               | 0.00961166  | 0.341866277 |
| cg03157862 |                               | 0.004405484 | 0.341787258 |

|            |                                         |             |             |
|------------|-----------------------------------------|-------------|-------------|
| cg25368647 | MXD3;MXD3                               | 0.000420813 | 0.341771868 |
| cg14596589 | SLC12A7                                 | 0.004405484 | 0.341763668 |
| cg26479022 |                                         | 0.002321262 | 0.341703272 |
| cg22555517 | RAP1GAP2;RAP1GAP2                       | 0.000420813 | 0.341584962 |
| cg16018154 | RPTOR;RPTOR                             | 0.000636165 | 0.341544196 |
| cg27592424 | C16orf58                                | 0.001038267 | 0.341531569 |
| cg22245858 | SCNN1A                                  | 0.000420813 | 0.341520237 |
| cg04228709 | TIAM2;TIAM2                             | 0.007567702 | 0.341485657 |
| cg13660174 | SURF4                                   | 0.007567702 | 0.341471793 |
| cg13823415 | TBXAS1;TBXAS1                           | 0.000636165 | 0.341220136 |
| cg25936902 |                                         | 0.002321262 | 0.341220095 |
| cg21769093 | VWC2                                    | 0.001569481 | 0.341174671 |
| cg14014879 | ABCA4                                   | 0.000420813 | 0.341144336 |
| cg18951390 | RPTOR;RPTOR                             | 0.002321262 | 0.341133694 |
| cg17276535 | RGS12;RGS12;RGS12                       | 0.000420813 | 0.341115194 |
| cg04204452 | SLC43A2                                 | 0.007567702 | 0.34109808  |
| cg24753998 | C21orf7;C21orf7                         | 0.000420813 | 0.341032333 |
| cg20686125 | AKT3;AKT3                               | 0.005790932 | 0.340924018 |
| cg07052063 | MMS19                                   | 0.000420813 | 0.34091807  |
| cg12374579 | ASPSCR1                                 | 0.000420813 | 0.340825659 |
| cg20636526 | C6orf10                                 | 0.000420813 | 0.34079523  |
| cg26814335 | AGPAT5                                  | 0.00961166  | 0.340744328 |
| cg06532212 | FKRP;FKRP                               | 0.007567702 | 0.340723973 |
| cg22888023 | RPTOR;RPTOR                             | 0.000420813 | 0.340709198 |
| cg00290355 | MED12L;P2RY14                           | 0.003185744 | 0.340662997 |
| cg14930864 | YWHAQ                                   | 0.001569481 | 0.340587563 |
| cg17922695 | SEPT9;SEPT9;SEPT9;SEPT9;SEPT9;SEPT9     | 0.003185744 | 0.340504112 |
| cg11884704 | SLC25A25;SLC25A25                       | 0.000420813 | 0.340415936 |
| cg19620086 | SLC38A2                                 | 0.002321262 | 0.340377738 |
| cg27434890 | MYB;MYB;MYB;MYB;MYB;MYB;MYB;MYB         | 0.00961166  | 0.340300884 |
| cg21757633 | SAPS2                                   | 0.000420813 | 0.340285534 |
| cg18919478 | CTHRC1                                  | 0.003185744 | 0.340132583 |
| cg04730930 | LILRB1;LILRB1;LILRB1;LILRB1             | 0.000420813 | 0.340068323 |
| cg02704331 | IQCE;IQCE                               | 0.000420813 | 0.340031696 |
| cg17469471 | UXS1                                    | 0.000420813 | 0.340030225 |
| cg26373351 | ETV6                                    | 0.000420813 | 0.340008906 |
| cg19982684 |                                         | 0.000420813 | 0.339881565 |
| cg00607755 | PKDCC                                   | 0.000420813 | 0.339828033 |
| cg25333602 | LOC146880;LOC146880                     | 0.000420813 | 0.339764305 |
| cg04023226 | CYGB;PRCD                               | 0.000420813 | 0.339746636 |
| cg18546384 | MAD1L1;MAD1L1;MAD1L1                    | 0.000420813 | 0.339646517 |
| cg04381049 |                                         | 0.002321262 | 0.339611235 |
| cg27423445 | APOLD1                                  | 0.007567702 | 0.339598391 |
| cg26828842 |                                         | 0.000420813 | 0.339584488 |
| cg09271709 | NRXN1;NRXN1                             | 0.003185744 | 0.339579556 |
| cg21111416 | HLTF;HLTF                               | 0.000420813 | 0.339516558 |
| cg02965295 | ANKRD44                                 | 0.000420813 | 0.339496279 |
| cg03879320 | SLC7A5                                  | 0.000420813 | 0.339414458 |
| cg14485514 | NCRNA00171                              | 0.001038267 | 0.339404703 |
| cg16167809 | LST1;LST1;LST1;LST1;LST1;LST1;LST1;LST1 | 0.000636165 | 0.339361036 |
| cg01829163 | SLC7A5                                  | 0.002321262 | 0.339356504 |
| cg16572224 | SH3PXD2B                                | 0.003185744 | 0.339331152 |
| cg08730778 | NDE1;NDE1                               | 0.000420813 | 0.33928449  |
| cg03787282 |                                         | 0.00961166  | 0.339276324 |
| cg21040069 | GPT                                     | 0.000420813 | 0.339244072 |
| cg00326902 | ROS1                                    | 0.000420813 | 0.339205928 |
| cg19570558 | MSH6                                    | 0.000636165 | 0.339177097 |
| cg01526553 | MYL6;MYL6                               | 0.001569481 | 0.339146564 |
| cg16578549 | CTNNBIP1;CTNNBIP1                       | 0.001038267 | 0.339113525 |

|            |                      |             |             |
|------------|----------------------|-------------|-------------|
| cg17125585 | GNG12                | 0.001038267 | 0.339078995 |
| cg05765647 | IQCE;IQCE            | 0.000420813 | 0.339051969 |
| cg11036672 | C4orf23              | 0.000420813 | 0.338972231 |
| cg04433322 | SLC4A1               | 0.000420813 | 0.338891664 |
| cg10036075 |                      | 0.000420813 | 0.338880223 |
| cg01437221 | MAD1L1;MAD1L1;MAD1L1 | 0.002321262 | 0.338879728 |
| cg21578050 | SEMA6A               | 0.000420813 | 0.338791914 |
| cg01113530 |                      | 0.005790932 | 0.338733654 |
| cg23859051 | SLC43A2              | 0.000420813 | 0.338714249 |
| cg00858400 | SLC7A5               | 0.004405484 | 0.338635346 |
| cg05808246 |                      | 0.005790932 | 0.338613033 |
| cg02800100 | AUTS2;AUTS2;AUTS2    | 0.000420813 | 0.338602212 |
| cg01862311 |                      | 0.007567702 | 0.338529702 |
| cg11045746 | FAM26F               | 0.003185744 | 0.338489023 |
| cg00599809 | POM121               | 0.000420813 | 0.338467763 |
| cg05819930 | GPRC5A               | 0.001038267 | 0.338437503 |
| cg07857444 |                      | 0.000420813 | 0.338437098 |
| cg18208602 | APCDD1               | 0.000636165 | 0.338433865 |
| cg16834011 | COMT                 | 0.000636165 | 0.338375298 |
| cg15393585 |                      | 0.000636165 | 0.338320092 |
| cg09275693 | LOC100133612         | 0.007567702 | 0.338267721 |
| cg13298209 | GRID2IP              | 0.000420813 | 0.338253557 |
| cg18328168 |                      | 0.000420813 | 0.338202955 |
| cg14615927 | HDAC4                | 0.003185744 | 0.338202331 |
| cg01454395 |                      | 0.005790932 | 0.338173784 |
| cg20495365 | RGS12;RGS12;RGS12    | 0.000420813 | 0.33810528  |
| cg10825068 |                      | 0.005790932 | 0.338104028 |
| cg17715243 | WDR37                | 0.002321262 | 0.337937978 |
| cg09039163 | ESPNL;ESPNL          | 0.000420813 | 0.337925277 |
| cg04353769 | MS4A6A;MS4A6A;MS4A6A | 0.000420813 | 0.337881709 |
| cg06568490 | HDAC11;HDAC11        | 0.000420813 | 0.337866047 |
| cg18470038 | ANO6;ANO6;ANO6;ANO6  | 0.002321262 | 0.337841244 |
| cg23449544 |                      | 0.000420813 | 0.337828974 |
| cg13356324 | GUK1;GUK1;GUK1       | 0.000636165 | 0.337821878 |
| cg27262821 | SEC1                 | 0.004405484 | 0.337811336 |
| cg02400308 | ATP10B               | 0.000636165 | 0.337704477 |
| cg26643870 |                      | 0.004405484 | 0.33763985  |
| cg06241812 | FOXP1;FOXP1          | 0.003185744 | 0.337516559 |
| cg03670238 | WISP1;WISP1          | 0.000636165 | 0.337504073 |
| cg26416981 | NINJ2                | 0.000420813 | 0.337461925 |
| cg12200164 | TNFAIP3              | 0.000636165 | 0.337428686 |
| cg12253071 |                      | 0.00961166  | 0.337338363 |
| cg09288885 |                      | 0.001038267 | 0.337230942 |
| cg00007221 | PTPRF;PTPRF          | 0.000420813 | 0.337217837 |
| cg18674487 |                      | 0.002321262 | 0.337216245 |
| cg01149940 | TRABD                | 0.000420813 | 0.337206768 |
| cg04790755 | CYHR1;CYHR1;CYHR1    | 0.000420813 | 0.337003857 |
| cg10030250 | MMP2;MMP2            | 0.001569481 | 0.336887778 |
| cg22304262 | SLC1A5;SLC1A5;SLC1A5 | 0.000636165 | 0.336878019 |
| cg27208536 | HTRA3                | 0.003185744 | 0.336825849 |
| cg07240689 | PDCD11               | 0.000420813 | 0.336821339 |
| cg17121205 | PHLDB3               | 0.005790932 | 0.336753032 |
| cg20543183 | LY6G5C               | 0.000420813 | 0.336710702 |
| cg01076495 | ECM1;ECM1;ECM1;ECM1  | 0.000420813 | 0.336682037 |
| cg09734418 | ITGB1BP1;ITGB1BP1    | 0.001569481 | 0.336616529 |
| cg15102179 |                      | 0.000420813 | 0.33655203  |
| cg20932822 | CMTM8                | 0.004405484 | 0.336455835 |
| cg06796885 |                      | 0.001569481 | 0.336434166 |
| cg01363734 | TESC;TESC;TESC       | 0.007567702 | 0.336417241 |

|            |                                           |             |             |
|------------|-------------------------------------------|-------------|-------------|
| cg08766256 | CMIP;CMIP                                 | 0.000420813 | 0.336349778 |
| cg09918634 |                                           | 0.000420813 | 0.33634359  |
| cg01364581 | GIMAP8                                    | 0.000420813 | 0.336321178 |
| cg19422205 | SEPT9;SEPT9;SEPT9;SEPT9;SEPT9             | 0.001569481 | 0.336318465 |
| cg26969933 | C6orf47;BAT4                              | 0.004405484 | 0.336306126 |
| cg00305585 | IFT140                                    | 0.000420813 | 0.336305838 |
| cg05965490 | RBPM5;RBPM5;RBPM5;RBPM5                   | 0.000532358 | 0.336280736 |
| cg15700582 | ARHGAP25;ARHGAP25                         | 0.002321262 | 0.336240274 |
| cg21711214 | HPS4;HPS4                                 | 0.003185744 | 0.336227801 |
| cg15173586 | FAM91A1                                   | 0.003185744 | 0.33604102  |
| cg02724472 | LRR17;FBXL13;LRR17;FBXL13                 | 0.000420813 | 0.3359987   |
| cg00942920 | LAX1;LAX1;LAX1                            | 0.000420813 | 0.335969962 |
| cg05246110 | SAPS3;SAPS3;SAPS3;SAPS3;SAPS3;SAPS3       | 0.000420813 | 0.335950106 |
| cg15323253 |                                           | 0.000420813 | 0.33586178  |
| cg14283710 | GTF3C5;GTF3C5                             | 0.001569481 | 0.33584572  |
| cg26478401 | FAS;FAS;FAS;FAS;FAS;FAS;FAS;ACTA2         | 0.000636165 | 0.335840531 |
| cg03787988 | MRVI1;MRVI1;MRVI1;MRVI1                   | 0.000420813 | 0.335809686 |
| cg11849692 | LDB1;LDB1                                 | 0.000420813 | 0.335790191 |
| cg04493247 | NSUN5;NSUN5;NSUN5;NSUN5                   | 0.002321262 | 0.335781096 |
| cg17018896 | MAD1L1;MAD1L1;MAD1L1                      | 0.000420813 | 0.335767422 |
| cg19722698 | TXNRD1;TXNRD1;TXNRD1;TXNRD1;TXNRD1        | 0.002321262 | 0.335678126 |
| cg26517376 | FAM53B                                    | 0.000420813 | 0.335647062 |
| cg23108232 |                                           | 0.005790932 | 0.335619043 |
| cg06855485 | GAB1;GAB1                                 | 0.000636165 | 0.335545168 |
| cg08672140 | LHFPL2                                    | 0.002629558 | 0.335532224 |
| cg04313565 | XYLT1                                     | 0.000420813 | 0.335500047 |
| cg20656868 | S1PR4                                     | 0.000420813 | 0.335467806 |
| cg15746187 | FBXO2;FBXO4                               | 0.000420813 | 0.335455359 |
| cg16527877 |                                           | 0.000420813 | 0.335439584 |
| cg25370567 |                                           | 0.001569481 | 0.335415337 |
| cg26853057 |                                           | 0.000420813 | 0.335412661 |
| cg03259887 |                                           | 0.000420813 | 0.33538971  |
| cg23522915 | HDAC7;HDAC7                               | 0.000420813 | 0.335387603 |
| cg10481072 | CDK6;CDK6                                 | 0.003185744 | 0.335371294 |
| cg15478483 |                                           | 0.003185744 | 0.33536788  |
| cg14716686 | C21orf7                                   | 0.000420813 | 0.335315399 |
| cg16602500 | ZCCHC11;ZCCHC11;ZCCHC11                   | 0.003185744 | 0.335243523 |
| cg25566714 | MUM1;MUM1                                 | 0.000420813 | 0.335237116 |
| cg08705382 | GALNT2                                    | 0.001569481 | 0.335232432 |
| cg16223546 |                                           | 0.005790932 | 0.335188422 |
| cg24231513 | RASGRF1;RASGRF1;RASGRF1                   | 0.000420813 | 0.335165705 |
| cg14272049 |                                           | 0.000636165 | 0.335163272 |
| cg21784940 | REPIN1;REPIN1;REPIN1;REPIN1               | 0.000636165 | 0.335162552 |
| cg15611037 | PPARD;PPARD                               | 0.000420813 | 0.335137965 |
| cg05918327 | ZFH3;ZFH3                                 | 0.001569481 | 0.335131219 |
| cg11231958 |                                           | 0.001777515 | 0.335100452 |
| cg09756109 | IFT140;TMEM204                            | 0.002321262 | 0.335082937 |
| cg15213650 | KDM4B                                     | 0.000420813 | 0.335049059 |
| cg19264571 | APCDD1                                    | 0.008237556 | 0.335023017 |
| cg24116385 |                                           | 0.003185744 | 0.335013571 |
| cg03988107 | HIC2                                      | 0.000420813 | 0.334924418 |
| cg05044994 | LPP;FLJ42393                              | 0.000420813 | 0.334912339 |
| cg12049875 | RIN2                                      | 0.007567702 | 0.334903804 |
| cg10483525 | ZFH3;ZFH3                                 | 0.000420813 | 0.334877129 |
| cg07739927 | LOC146880;LOC146880                       | 0.000420813 | 0.334873507 |
| cg09976051 | AGA                                       | 0.000636165 | 0.334819196 |
| cg26226408 | LOC646982;LOC646982;LOC646982             | 0.001569481 | 0.334780174 |
| cg16747164 |                                           | 0.000420813 | 0.334584621 |
| cg03631656 | ANGPT2;ANGPT2;ANGPT2;ANGPT2;ANGPT2;ANGPT2 | 0.007567702 | 0.334560918 |



|            |                                                |             |             |
|------------|------------------------------------------------|-------------|-------------|
| cg26426774 | C8orf41;MAK16;C8orf41                          | 0.000636165 | 0.334547674 |
| cg22370920 |                                                | 0.002321262 | 0.334433207 |
| cg21851956 | GRID2IP                                        | 0.000420813 | 0.334396268 |
| cg03408904 | CECR2                                          | 0.007567702 | 0.334394219 |
| cg26068180 | NASP;NASP;NASP                                 | 0.002321262 | 0.334370362 |
| cg14016418 |                                                | 0.000420813 | 0.334322783 |
| cg07376029 | GC                                             | 0.002321262 | 0.334276429 |
| cg20203400 | TMEM182                                        | 0.002321262 | 0.334163487 |
| cg09151131 |                                                | 0.000420813 | 0.334140557 |
| cg03725404 | SLC2A9;SLC2A9                                  | 0.002321262 | 0.334110537 |
| cg01330815 | LRRN2;LRRN2                                    | 0.000420813 | 0.334106865 |
| cg06586713 | PCLO;PCLO                                      | 0.000636165 | 0.334080779 |
| cg03502979 | ADPRHL1;ADPRHL1                                | 0.000420813 | 0.33400702  |
| cg19668951 | SLC39A13;SLC39A13                              | 0.000420813 | 0.33400123  |
| cg06848060 | GUCY2D                                         | 0.001038267 | 0.333938986 |
| cg01619533 | ANKRD11                                        | 0.000420813 | 0.333898127 |
| cg00294534 | PSMG3;PSMG3                                    | 0.005790932 | 0.333853096 |
| cg13537156 | C17orf28                                       | 0.000420813 | 0.333814204 |
| cg17194270 | SYNGR1;SYNGR1;SYNGR1                           | 0.007567702 | 0.333767839 |
| cg04157865 | TBC1D16                                        | 0.000420813 | 0.333763107 |
| cg03209332 |                                                | 0.005790932 | 0.333662098 |
| cg07155381 | RPH3AL                                         | 0.000420813 | 0.333650191 |
| cg19379721 | LPAR2                                          | 0.000636165 | 0.333630178 |
| cg16771104 | HESX1;HESX1                                    | 0.000420813 | 0.333592397 |
| cg23344241 | SPTBN2                                         | 0.003185744 | 0.33354874  |
| cg09701062 |                                                | 0.000420813 | 0.333537987 |
| cg05638589 | TNS3                                           | 0.007567702 | 0.333535572 |
| cg15948504 | PI4KB                                          | 0.000420813 | 0.333453959 |
| cg02010852 | CRB2                                           | 0.000420813 | 0.333442366 |
| cg18954479 | CDKAL1                                         | 0.001173833 | 0.333423896 |
| cg20382675 | FOXP1;MIR1284;FOXP1                            | 0.001038267 | 0.333420646 |
| cg08780218 |                                                | 0.000420813 | 0.333417363 |
| cg04049033 | RILP                                           | 0.000420813 | 0.333304903 |
| cg16518115 | SERINC5                                        | 0.000420813 | 0.333260226 |
| cg10818676 | DUSP27                                         | 0.000466745 | 0.333256871 |
| cg24785473 |                                                | 0.007567702 | 0.333222086 |
| cg03900378 |                                                | 0.002321262 | 0.333218346 |
| cg25472296 | DOCK1                                          | 0.00961166  | 0.333214294 |
| cg25817639 | ODZ3                                           | 0.000420813 | 0.333144809 |
| cg02409722 | SETD7                                          | 0.001569481 | 0.333099727 |
| cg15559456 | S100A13;S100A13;S100A13;S100A1;S100A13;S100A13 | 0.000420813 | 0.333045302 |
| cg06957310 | ADAP2                                          | 0.003185744 | 0.333042453 |
| cg05031424 | SLC16A11                                       | 0.000420813 | 0.333023161 |
| cg19662895 |                                                | 0.004405484 | 0.332977842 |
| cg09682727 |                                                | 0.000420813 | 0.332929941 |
| cg16049597 |                                                | 0.004405484 | 0.332928646 |
| cg15863827 | KCNMA1;KCNMA1;KCNMA1;KCNMA1                    | 0.000420813 | 0.332892043 |
| cg01092108 |                                                | 0.005790932 | 0.33283441  |
| cg21502048 | PTGER2                                         | 0.000420813 | 0.332772337 |
| cg12128262 | IER3IP1                                        | 0.003185744 | 0.332769346 |
| cg10044470 |                                                | 0.000420813 | 0.332742921 |
| cg26138846 | SLC44A4                                        | 0.000420813 | 0.332728087 |
| cg04677846 | C21orf33;C21orf33                              | 0.000420813 | 0.332694059 |
| cg20768358 | TP73                                           | 0.003185744 | 0.332691329 |
| cg26875131 | VASH2;VASH2;VASH2                              | 0.000420813 | 0.332552003 |
| cg08741688 | RGS12;RGS12;RGS12                              | 0.000420813 | 0.332539457 |
| cg04585669 | VGLL4;VGLL4;VGLL4;VGLL4                        | 0.000420813 | 0.332466944 |
| cg07636761 | USP7                                           | 0.004405484 | 0.332375233 |
| cg13720710 | ADARB2                                         | 0.001569481 | 0.332311514 |

|            |                                           |             |             |
|------------|-------------------------------------------|-------------|-------------|
| cg13601739 | SLCO2B1;SLCO2B1;SLCO2B1                   | 0.000420813 | 0.332301673 |
| cg00313685 | CUX1;CUX1;CUX1                            | 0.002321262 | 0.332265545 |
| cg17394304 | BCL6;BCL6;BCL6;BCL6                       | 0.000420813 | 0.332184981 |
| cg08126118 | ENOX1;ENOX1                               | 0.000420813 | 0.332127247 |
| cg05948872 | PFKFB2                                    | 0.000420813 | 0.332089647 |
| cg17320378 | FAM129C                                   | 0.000420813 | 0.332078837 |
| cg11134246 | CCDC24                                    | 0.004405484 | 0.33204575  |
| cg00547480 | LDB1;LDB1                                 | 0.004405484 | 0.332009248 |
| cg11633461 | C10orf54;CDH23                            | 0.000420813 | 0.332006772 |
| cg10256468 | GYG1                                      | 0.000420813 | 0.332006753 |
| cg25507845 | CAMK2A;CAMK2A                             | 0.000420813 | 0.332000548 |
| cg13720395 | YWHAG                                     | 0.000420813 | 0.331946644 |
| cg06407843 |                                           | 0.00961166  | 0.331940851 |
| cg26254667 | TNFRSF1A                                  | 0.000420813 | 0.331939925 |
| cg18039797 | BUB1B;PAK6;PAK6                           | 0.000420813 | 0.331936698 |
| cg05202300 |                                           | 0.000420813 | 0.33186923  |
| cg05517572 | STAP2;STAP2;STAP2;STAP2                   | 0.001038267 | 0.331855546 |
| cg04329347 | ALDOA                                     | 0.001038267 | 0.331854447 |
| cg10346364 | LOC100130987;CLCF1;CLCF1                  | 0.000420813 | 0.33185297  |
| cg14642395 | SLC22A11                                  | 0.000420813 | 0.331834741 |
| cg19595244 | AHCYL1                                    | 0.00961166  | 0.331828212 |
| cg10859151 | SH2D4B;SH2D4B                             | 0.000420813 | 0.331773716 |
| cg00584686 | SNTG2                                     | 0.000420813 | 0.331747881 |
| cg20277740 | NPHP4                                     | 0.000420813 | 0.331747642 |
| cg02067584 | C17orf59                                  | 0.007567702 | 0.331609905 |
| cg08632701 |                                           | 0.000636165 | 0.331600948 |
| cg13783238 | SMC4;MIR15B;SMC4;MIR16-2                  | 0.001038267 | 0.331561835 |
| cg15511120 |                                           | 0.00961166  | 0.331543206 |
| cg27051260 | C1QTNF4                                   | 0.000420813 | 0.331534477 |
| cg25064352 |                                           | 0.000420813 | 0.331210409 |
| cg08661112 | PANK1                                     | 0.000420813 | 0.331167254 |
| cg18796027 | KIFC1                                     | 0.000420813 | 0.331122529 |
| cg16067536 |                                           | 0.000420813 | 0.331110893 |
| cg14694744 | XIRP1                                     | 0.001038267 | 0.331092379 |
| cg08390901 | LOC100287216;SH3RF3                       | 0.000636165 | 0.331068349 |
| cg06098215 | NCOA4;NCOA4;NCOA4;NCOA4;NCOA4             | 0.001038267 | 0.331013926 |
| cg26721382 | MATN1                                     | 0.000420813 | 0.330983398 |
| cg03330678 | SEPT9;SEPT9;SEPT9;SEPT9                   | 0.003185744 | 0.330742089 |
| cg22149555 |                                           | 0.005790932 | 0.330620371 |
| cg26925644 | PHLDB1                                    | 0.000420813 | 0.33061337  |
| cg17701942 | STX5                                      | 0.001038267 | 0.330583956 |
| cg20442697 | LRRC17;FBXL13;LRRC17;LRRC17;LRRC17;FBXL13 | 0.000420813 | 0.330445713 |
| cg00483992 |                                           | 0.000420813 | 0.330428716 |
| cg14587065 | P2RX1                                     | 0.002321262 | 0.330362631 |
| cg02839351 | HDGF2;HDGF2                               | 0.000420813 | 0.330359547 |
| cg08461760 |                                           | 0.003185744 | 0.330351575 |
| cg16857113 | CNTN6                                     | 0.003185744 | 0.330344503 |
| cg16103203 | TINAGL1                                   | 0.000420813 | 0.330319653 |
| cg24714606 | MBNL2;MBNL2                               | 0.000420813 | 0.330310431 |
| cg09020213 | RASA3                                     | 0.001569481 | 0.330307476 |
| cg03646329 | LPAR6;LPAR6;LPAR6;RB1;LPAR6               | 0.003185744 | 0.33029753  |
| cg08130175 | UBXN10                                    | 0.000420813 | 0.330263478 |
| cg27462475 | DOCK9;DOCK9                               | 0.005790932 | 0.330235378 |
| cg09923593 | CEP68                                     | 0.001569481 | 0.330179242 |
| cg11869828 | APOC3                                     | 0.000420813 | 0.330174971 |
| cg08383160 |                                           | 0.000420813 | 0.330173941 |
| cg01301660 |                                           | 0.002321262 | 0.330139748 |
| cg01366670 | CBFA2T3;CBFA2T3                           | 0.000420813 | 0.330071666 |
| cg06610259 | MLXIP                                     | 0.000420813 | 0.330019566 |

|            |                                          |             |             |
|------------|------------------------------------------|-------------|-------------|
| cg12724086 | MKLN1                                    | 0.000420813 | 0.32999434  |
| cg10857441 | POLS                                     | 0.00961166  | 0.329967221 |
| cg21484631 | UHRF1;UHRF1                              | 0.000420813 | 0.329912469 |
| cg17298005 | ELK3                                     | 0.000420813 | 0.329901147 |
| cg15701612 |                                          | 0.001038267 | 0.329857195 |
| cg00113315 | SLC2A5;SLC2A5                            | 0.000420813 | 0.329809055 |
| cg12689752 | IQGAP3                                   | 0.000636165 | 0.329785682 |
| cg04468671 |                                          | 0.007567702 | 0.329691495 |
| cg13361023 | ATP10A                                   | 0.000420813 | 0.329659007 |
| cg02462661 | STOML1                                   | 0.000420813 | 0.329658721 |
| cg20117260 | ATP5SL;ATP5SL;ATP5SL;ATP5SL;ATP5SL;ATP5S | 0.004405484 | 0.329604794 |
| cg06654628 | SYNPO;SYNPO;SYNPO;SYNPO                  | 0.000420813 | 0.329569645 |
| cg20687098 | WIPF1;WIPF1                              | 0.007567702 | 0.329520477 |
| cg18411043 | LAPTM5                                   | 0.000420813 | 0.32951473  |
| cg13948857 | C5orf56                                  | 0.000420813 | 0.329513933 |
| cg09653641 | CDK6;CDK6                                | 0.000420813 | 0.329497034 |
| cg04623297 | RFX8                                     | 0.001038267 | 0.329477183 |
| cg07827420 | SEPT9;SEPT9;SEPT9;SEPT9;SEPT9            | 0.002321262 | 0.329477138 |
| cg14457610 | LMOD3;LMOD3                              | 0.000420813 | 0.329450796 |
| cg20232503 | PAK1;PAK1                                | 0.001569481 | 0.329444691 |
| cg07523043 | TRIM26                                   | 0.007567702 | 0.329417689 |
| cg15492982 |                                          | 0.000420813 | 0.329222047 |
| cg06513139 | UBXN6;UBXN6                              | 0.000420813 | 0.329193151 |
| cg14742809 | ZSWIM6                                   | 0.000420813 | 0.329143292 |
| cg05522498 | DCPS                                     | 0.000420813 | 0.32911211  |
| cg02997962 | C20orf26;CRNKL1;C20orf26                 | 0.007567702 | 0.329095484 |
| cg17301053 | RPS6KA2;RPS6KA2                          | 0.001038267 | 0.329070509 |
| cg00975876 | PRICKLE4                                 | 0.000420813 | 0.329003163 |
| cg02847674 | NPPA                                     | 0.000420813 | 0.328954846 |
| cg22787468 | SEZ6;SEZ6                                | 0.004405484 | 0.328899813 |
| cg06784232 | CSGALNACT1;CSGALNACT1                    | 0.000420813 | 0.328876123 |
| cg15571705 | BARX2                                    | 0.004405484 | 0.328803334 |
| cg01147055 | RASA3                                    | 0.000420813 | 0.328577919 |
| cg08489478 | ZFYVE27;ZFYVE27;ZFYVE27                  | 0.000420813 | 0.328564547 |
| cg11075561 |                                          | 0.002321262 | 0.328551958 |
| cg17220749 | GALNT2                                   | 0.002321262 | 0.328534639 |
| cg23829395 |                                          | 0.000420813 | 0.328470089 |
| cg08314457 |                                          | 0.002321262 | 0.328326057 |
| cg21149811 | SNTG2                                    | 0.000420813 | 0.328319033 |
| cg02645135 |                                          | 0.003185744 | 0.328270079 |
| cg23524191 | MAD1L1;MAD1L1;MAD1L1                     | 0.001569481 | 0.328237309 |
| cg00999858 | MAN1C1                                   | 0.000420813 | 0.328123043 |
| cg16596859 |                                          | 0.000420813 | 0.32810104  |
| cg08380391 | AATK                                     | 0.000420813 | 0.328074392 |
| cg11948905 |                                          | 0.000420813 | 0.328041277 |
| cg07862930 | KCNJ16;KCNJ16;KCNJ16                     | 0.007567702 | 0.327993953 |
| cg17910478 |                                          | 0.000420813 | 0.327969994 |
| cg27353085 | PLXND1                                   | 0.000420813 | 0.327952051 |
| cg02761866 | ASB8                                     | 0.000420813 | 0.327901594 |
| cg12385021 |                                          | 0.000420813 | 0.327843986 |
| cg05657709 | ILDR1                                    | 0.000420813 | 0.327820445 |
| cg12422704 | ABR;ABR                                  | 0.000420813 | 0.327766487 |
| cg19027424 | SH3PXD2B                                 | 0.000420813 | 0.327744989 |
| cg09141635 | RBM47                                    | 0.00961166  | 0.327585983 |
| cg26103369 | KIAA0317                                 | 0.000420813 | 0.327565476 |
| cg16125874 | CLEC14A;CLEC14A                          | 0.000420813 | 0.327463065 |
| cg08906309 | LOC100128288                             | 0.003185744 | 0.327453139 |
| cg08783317 |                                          | 0.000636165 | 0.327429601 |
| cg27496296 | BAHCC1                                   | 0.003185744 | 0.327412807 |

|            |                                           |             |             |
|------------|-------------------------------------------|-------------|-------------|
| cg03290748 | PIAS1                                     | 0.000420813 | 0.327381563 |
| cg25214914 | RXFP4                                     | 0.000420813 | 0.327374442 |
| cg14963928 |                                           | 0.005790932 | 0.327348742 |
| cg04535236 | GATA2;GATA2;GATA2                         | 0.001038267 | 0.327335612 |
| cg14185922 | ENG;ENG                                   | 0.000420813 | 0.327312567 |
| cg22137236 |                                           | 0.000636165 | 0.327309938 |
| cg16111448 | DHDPSL;DHDPSL                             | 0.000420813 | 0.327278234 |
| cg06524846 |                                           | 0.002321262 | 0.327277763 |
| cg18493214 | KIF13A;KIF13A;KIF13A;KIF13A               | 0.000420813 | 0.327158164 |
| cg13470063 | TIE1                                      | 0.000420813 | 0.327141898 |
| cg19341945 |                                           | 0.000420813 | 0.32710131  |
| cg14527110 | P4HA2;P4HA2;P4HA2;P4HA2;P4HA2             | 0.000420813 | 0.327097466 |
| cg04189320 |                                           | 0.000420813 | 0.327031951 |
| cg19561297 | LRRC17;FBXL13;LRRC17;LRRC17;LRRC17;FBXL13 | 0.000420813 | 0.326962869 |
| cg22341788 | FLT1;FLT1;FLT1;FLT1                       | 0.000420813 | 0.326922251 |
| cg16981685 |                                           | 0.003185744 | 0.326908443 |
| cg21220520 | C14orf105;C14orf105                       | 0.002321262 | 0.326889498 |
| cg09530438 |                                           | 0.000420813 | 0.326723042 |
| cg05246645 |                                           | 0.000420813 | 0.326673787 |
| cg02291020 | ANXA11;ANXA11;ANXA11                      | 0.003004124 | 0.326668142 |
| cg02332537 | RTP3                                      | 0.000420813 | 0.326664378 |
| cg25542745 |                                           | 0.003613402 | 0.326644118 |
| cg15779785 | CACNA1C;CACNA1C;CACNA1C;CACNA1C;CACNA1C   | 0.007567702 | 0.326614186 |
| cg14149774 | FAM69B                                    | 0.002321262 | 0.326606254 |
| cg21171115 | AKAP2;PALM2-AKAP2;PALM2-AKAP2;AKAP2       | 0.00961166  | 0.326522987 |
| cg06714981 | SND1                                      | 0.000420813 | 0.326473972 |
| cg20752878 | ASGR1                                     | 0.007567702 | 0.326452471 |
| cg18041814 | CPNE5                                     | 0.000420813 | 0.326342919 |
| cg12131208 | C17orf64                                  | 0.005790932 | 0.326311297 |
| cg08497772 |                                           | 0.000420813 | 0.326287536 |
| cg23779478 | SLA2;SLA2                                 | 0.003185744 | 0.326282066 |
| cg15930380 | MIER1;MIER1;MIER1;MIER1;MIER1;MIER1;MIER1 | 0.000420813 | 0.326256087 |
| cg24212377 |                                           | 0.000420813 | 0.326209177 |
| cg19445335 | ADAP1                                     | 0.000420813 | 0.326182292 |
| cg12271487 | ARMC2                                     | 0.001038267 | 0.326151732 |
| cg26544722 |                                           | 0.004405484 | 0.326136799 |
| cg06412669 | RPTOR;RPTOR                               | 0.000420813 | 0.326092432 |
| cg16289618 | LOC285830;LOC285830                       | 0.005790932 | 0.32597739  |
| cg02414045 | SMAD3                                     | 0.000420813 | 0.325894545 |
| cg17839611 | ABI3;ABI3;GNGT2                           | 0.000636165 | 0.325853079 |
| cg04087571 | SIK3                                      | 0.001569481 | 0.325766578 |
| cg18964319 |                                           | 0.007567702 | 0.325732719 |
| cg02108623 | PRDM1                                     | 0.000420813 | 0.325730284 |
| cg16665442 |                                           | 0.003185744 | 0.325642641 |
| cg10270895 | PARD3                                     | 0.005790932 | 0.325589248 |
| cg13226839 | LYRM4;LYRM4                               | 0.002321262 | 0.325544684 |
| cg14043316 | PLXNB2                                    | 0.000420813 | 0.325535051 |
| cg03763518 | C1orf54                                   | 0.000420813 | 0.325523861 |
| cg01546472 | ODZ3                                      | 0.000636165 | 0.325500985 |
| cg24531534 | LOXL2                                     | 0.001038267 | 0.325500133 |
| cg22978003 | UGT3A2;UGT3A2;UGT3A2                      | 0.000420813 | 0.325440616 |
| cg04061506 |                                           | 0.003185744 | 0.325438387 |
| cg27613013 | MED9                                      | 0.000420813 | 0.325430532 |
| cg08830576 | C16orf91                                  | 0.000420813 | 0.325384123 |
| cg03348100 |                                           | 0.005790932 | 0.325367328 |
| cg23685994 |                                           | 0.000420813 | 0.325363997 |
| cg11415156 |                                           | 0.000420813 | 0.325321902 |
| cg07840332 |                                           | 0.000420813 | 0.325287699 |
| cg00864684 |                                           | 0.000420813 | 0.325262821 |

|            |                                         |                   |             |
|------------|-----------------------------------------|-------------------|-------------|
| cg24442766 | INADL                                   | 0.003185744       | 0.325211791 |
| cg27428104 | TNXB                                    | 0.000420813       | 0.325189291 |
| cg24055836 | FAM190A;FAM190A                         | 0.001569481       | 0.32518567  |
| cg00825967 | CBFA2T3;CBFA2T3                         | 0.000420813       | 0.325169827 |
| cg12649175 | DPP4                                    | 0.000420813       | 0.325149016 |
| cg24074477 | CECR2                                   | 0.007567702       | 0.3251398   |
| cg14115597 | SSBP2                                   | 0.001038267       | 0.325131527 |
| cg01929340 | GAS7                                    | 0.002321262       | 0.325124281 |
| cg00469897 |                                         | 0.002321262       | 0.325113104 |
| cg03226872 | BLCAP;BLCAP;BLCAP;BLCAP;BLCAP           | 0.000420813       | 0.325113036 |
| cg21535931 | PLEC1;PLEC1                             | 0.003185744       | 0.32509926  |
| cg14519515 | ADRBK1                                  | 0.000420813       | 0.324950055 |
| cg14743210 |                                         | 0.000420813       | 0.324893264 |
| cg04701716 | CKLF;CKLF;CKLF;CKLF;CKLF                | 0.000636165       | 0.324892629 |
| cg14531665 | SPIN1                                   | 0.000420813       | 0.324889702 |
| cg17806069 |                                         | 0.000420813       | 0.324879097 |
| cg06333233 | CREG2                                   | 0.002321262       | 0.32486539  |
| cg15481493 |                                         | 0.007567702       | 0.324819619 |
| cg15068180 |                                         | 0.007567702       | 0.324805481 |
| cg05486924 | C3orf21                                 | 0.000420813       | 0.3248025   |
| cg05382012 | AGRP;AGRP                               | 0.005790932       | 0.32474348  |
| cg27534833 |                                         | 0.000420813       | 0.324726814 |
| cg17749384 | MPP7                                    | 0.000420813       | 0.324725562 |
| cg05729480 |                                         | 9-Sep 0.000420813 | 0.324691553 |
| cg02288964 | AGRN                                    | 0.001038267       | 0.324677446 |
| cg02505015 |                                         | 0.000420813       | 0.324652323 |
| cg20869310 |                                         | 0.000420813       | 0.324636854 |
| cg13178170 | TGFBR3                                  | 0.000420813       | 0.324626806 |
| cg10709350 | LPTM5                                   | 0.000420813       | 0.324535422 |
| cg27637303 |                                         | 0.002321262       | 0.324519669 |
| cg13167431 |                                         | 0.000420813       | 0.324490271 |
| cg27292264 | MIR1280;EEFSEC                          | 0.000420813       | 0.324432508 |
| cg06458106 |                                         | 0.00961166        | 0.324415006 |
| cg18109874 | RFX1                                    | 0.002321262       | 0.324366517 |
| cg00864618 |                                         | 0.000636165       | 0.324365064 |
| cg20674658 | RNPEP                                   | 0.000420813       | 0.324355237 |
| cg13109911 | PEA15                                   | 0.000420813       | 0.324333836 |
| cg04921244 |                                         | 0.000420813       | 0.324260585 |
| cg03775372 | FRMD4A                                  | 0.000420813       | 0.324257495 |
| cg17465423 | ZNF385A;ZNF385A                         | 0.000420813       | 0.324230541 |
| cg03455424 |                                         | 0.000636165       | 0.324220673 |
| cg08461451 | LINGO3                                  | 0.00961166        | 0.324214446 |
| cg06624267 |                                         | 0.000420813       | 0.324165028 |
| cg22129323 | VAMP1;VAMP1;VAMP1                       | 0.000420813       | 0.324127852 |
| cg25383605 | TIAM2;TIAM2                             | 0.000420813       | 0.324016469 |
| cg18173263 | PEMT;PEMT;PEMT                          | 0.001569481       | 0.324004446 |
| cg07037725 | SPRY4;SPRY4                             | 0.000636165       | 0.323927537 |
| cg07974367 |                                         | 0.000420813       | 0.323883238 |
| cg00930515 |                                         | 0.000420813       | 0.323872065 |
| cg08552043 | KCNQ1;KCNQ1                             | 0.000636165       | 0.323865869 |
| cg17051239 | CCDC121;CCDC121;GPN1;GPN1;CCDC121;GPN1  | 0.000420813       | 0.323751725 |
| cg17711527 | LAX1;LAX1;LAX1;LAX1                     | 0.000420813       | 0.323696884 |
| cg21336373 | P2RX1                                   | 0.002321262       | 0.323685687 |
| cg13671299 | EHD1                                    | 0.007567702       | 0.323653933 |
| cg21142904 | KIRREL                                  | 0.000420813       | 0.323627335 |
| cg15002163 | HDAC4                                   | 0.007567702       | 0.323622615 |
| cg11296767 | SERPINB9                                | 0.003185744       | 0.323615329 |
| cg14774440 | RAB11FIP1;RAB11FIP1;RAB11FIP1;RAB11FIP1 | 0.000420813       | 0.323589277 |
| cg03567896 | GRPEL1                                  | 0.001038267       | 0.323559942 |

|            |                                         |             |             |
|------------|-----------------------------------------|-------------|-------------|
| cg08791347 | FRMD4A                                  | 0.000420813 | 0.323386457 |
| cg16649560 | IL4R;IL4R                               | 0.000420813 | 0.323381103 |
| cg12292060 | GABBR1;GABBR1                           | 0.000420813 | 0.323305838 |
| cg00122628 | WISP1;WISP1                             | 0.000420813 | 0.323303611 |
| cg03718845 |                                         | 0.00961166  | 0.323298242 |
| cg01048349 | FLJ10357                                | 0.000420813 | 0.323266947 |
| cg25461186 | MLXIP                                   | 0.001569481 | 0.323236443 |
| cg14667192 | ADARB2                                  | 0.000420813 | 0.323223714 |
| cg13762691 | CECR2                                   | 0.002321262 | 0.3231543   |
| cg09323092 | LMF1                                    | 0.001569481 | 0.323056719 |
| cg01833923 | GNGT2;ABI3;ABI3;GNGT2                   | 0.000420813 | 0.323049853 |
| cg07517739 |                                         | 0.00961166  | 0.323044955 |
| cg22360765 | TTC7A                                   | 0.000420813 | 0.323024691 |
| cg15690760 | POLS                                    | 0.007567702 | 0.322958772 |
| cg07048516 | C22orf15                                | 0.000420813 | 0.322847223 |
| cg27471192 |                                         | 0.001038267 | 0.322839385 |
| cg19737746 | ELK3                                    | 0.003185744 | 0.322776929 |
| cg26539468 | CCDC111                                 | 0.00961166  | 0.322725382 |
| cg20306694 | BIN2                                    | 0.00961166  | 0.32272304  |
| cg14603886 | ERN1                                    | 0.001038267 | 0.322676353 |
| cg00813264 |                                         | 0.000420813 | 0.322663547 |
| cg12882572 | DUSP14                                  | 0.000420813 | 0.322643776 |
| cg26203136 | PRKAR1B;PRKAR1B;PRKAR1B;PRKAR1B;PRKAR1B | 0.008581131 | 0.322593425 |
| cg23157419 | PTPN9                                   | 0.001038267 | 0.32258852  |
| cg04022194 |                                         | 0.000636165 | 0.322547376 |
| cg03619840 |                                         | 0.002321262 | 0.322528323 |
| cg24706966 | MAD1L1;MAD1L1;MAD1L1                    | 0.000420813 | 0.322526998 |
| cg10118167 | PLXNC1                                  | 0.002321262 | 0.322510961 |
| cg25215890 | CD48                                    | 0.000420813 | 0.322464406 |
| cg20651389 | GP6;GP6                                 | 0.001038267 | 0.322458318 |
| cg18601229 | EHD4                                    | 0.001038267 | 0.322432999 |
| cg25843651 | KLHL25                                  | 0.000420813 | 0.322414792 |
| cg26239850 |                                         | 0.000420813 | 0.322266781 |
| cg18517055 | WDR45L                                  | 0.005790932 | 0.322197898 |
| cg23347250 | BTBD6;BRF1;BRF1;BRF1                    | 0.004405484 | 0.322156928 |
| cg14613228 |                                         | 0.001038267 | 0.322129183 |
| cg09318283 |                                         | 0.001038267 | 0.322122085 |
| cg20450198 |                                         | 0.002321262 | 0.322098221 |
| cg04667114 |                                         | 0.000420813 | 0.322076919 |
| cg01797450 |                                         | 0.001569481 | 0.322066688 |
| cg09190408 | PPP1CA;PPP1CA;TBC1D10C;PPP1CA           | 0.000420813 | 0.322066494 |
| cg20630690 | ZGLP1                                   | 0.000420813 | 0.321989073 |
| cg02113385 | NFATC1;NFATC1;NFATC1;NFATC1;NFATC1      | 0.007567702 | 0.32197644  |
| cg16570223 | CHRNA3;CHRNA3                           | 0.000636165 | 0.321953658 |
| cg27223728 |                                         | 0.003185744 | 0.321953541 |
| cg21118780 | MAP4K4;MAP4K4;MAP4K4                    | 0.001569481 | 0.321917918 |
| cg26415516 | IPCEF1;OPRM1;IPCEF1;IPCEF1              | 0.000420813 | 0.321884906 |
| cg13681496 |                                         | 0.001569481 | 0.321876861 |
| cg22548485 | TULP1                                   | 0.002321262 | 0.321851985 |
| cg11129609 | WDR46;WDR46                             | 0.00961166  | 0.321755312 |
| cg13060454 |                                         | 0.000420813 | 0.321753442 |
| cg20722088 | DUSP6;DUSP6                             | 0.001038267 | 0.321736238 |
| cg10621597 |                                         | 0.000420813 | 0.321625299 |
| cg02978140 |                                         | 0.000636165 | 0.321603892 |
| cg05703230 |                                         | 0.004405484 | 0.321597917 |
| cg24534583 | RNF216;RNF216                           | 0.004405484 | 0.321540825 |
| cg14335159 |                                         | 0.002321262 | 0.321533643 |
| cg20591695 | FLJ32065                                | 0.002321262 | 0.321510101 |
| cg25467710 | HMCN1                                   | 0.001569481 | 0.321451751 |

|            |                                       |             |             |
|------------|---------------------------------------|-------------|-------------|
| cg21932452 | NOS3                                  | 0.000420813 | 0.321442091 |
| cg18352721 |                                       | 0.002321262 | 0.321439053 |
| cg21721489 | HMGB1                                 | 0.000420813 | 0.321430594 |
| cg25314111 | AACSL                                 | 0.000636165 | 0.321423849 |
| cg26452915 | GNAS;GNAS;GNAS;GNAS;GNAS;GNAS;GNAS;GN | 0.002321262 | 0.321421882 |
| cg10937494 | SLC16A3;SLC16A3;SLC16A3               | 0.000420813 | 0.321398845 |
| cg01534887 | C10orf55                              | 0.000420813 | 0.321379718 |
| cg21686213 | IFITM1                                | 0.001038267 | 0.321335039 |
| cg13641082 | SNX8                                  | 0.000636165 | 0.321305994 |
| cg07172701 | SERINC5                               | 0.001569481 | 0.321282932 |
| cg09879253 |                                       | 0.000420813 | 0.321279509 |
| cg00827893 | PDS5B                                 | 0.002321262 | 0.321103252 |
| cg26922854 |                                       | 0.005790932 | 0.321042303 |
| cg07241457 |                                       | 0.000420813 | 0.321012524 |
| cg24585377 | RPS6KA1                               | 0.000420813 | 0.320937669 |
| cg12549180 |                                       | 0.000420813 | 0.320919397 |
| cg00770754 | ANKRD11                               | 0.007567702 | 0.320914258 |
| cg06974034 | ACVR1C;ACVR1C;ACVR1C;ACVR1C           | 0.004405484 | 0.320900634 |
| cg04381888 | HDAC7;HDAC7                           | 0.000420813 | 0.320859406 |
| cg14221700 |                                       | 0.000420813 | 0.320847127 |
| cg12799029 | ABR;ABR;ABR                           | 0.002321262 | 0.320828919 |
| cg05404787 | C2orf48;C2orf48                       | 0.000420813 | 0.320803431 |
| cg20623350 | ENTHD1                                | 0.007567702 | 0.320780372 |
| cg25959472 | FBXW11;FBXW11;FBXW11                  | 0.002321262 | 0.320668247 |
| cg10075360 | DPYSL2                                | 0.000420813 | 0.320578555 |
| cg02059176 |                                       | 0.005790932 | 0.320556228 |
| cg12186909 | PDE4A                                 | 0.000420813 | 0.32054613  |
| cg06686156 | ACSM5                                 | 0.000420813 | 0.320534849 |
| cg01400685 | FADS2                                 | 0.00961166  | 0.320526656 |
| cg19040012 | SCUBE3                                | 0.000420813 | 0.320488657 |
| cg18289508 |                                       | 0.002321262 | 0.32046313  |
| cg02393699 | PRKCZ;PRKCZ;PRKCZ                     | 0.005790932 | 0.320430872 |
| cg23709231 |                                       | 0.000420813 | 0.320327313 |
| cg13026137 | CLIC1                                 | 0.000420813 | 0.320317052 |
| cg03717584 | CCDC109A                              | 0.001038267 | 0.320310713 |
| cg01598733 | ILDR1                                 | 0.002321262 | 0.320287566 |
| cg13621113 | SFRS8                                 | 0.004405484 | 0.320258308 |
| cg27020966 |                                       | 0.000420813 | 0.320253642 |
| cg01579884 | ELMO1;ELMO1;ELMO1                     | 0.000420813 | 0.320232084 |
| cg08129092 | INTS3                                 | 0.000420813 | 0.32021402  |
| cg26509012 | STX2;STX2                             | 0.007567702 | 0.320183586 |
| cg09347578 | GRID2IP                               | 0.001569481 | 0.320149807 |
| cg15474579 | CDKN1A;CDKN1A                         | 0.000420813 | 0.32010899  |
| cg27342781 |                                       | 0.000420813 | 0.320105231 |
| cg09344631 | COL11A2;COL11A2;COL11A2               | 0.001038267 | 0.320060641 |
| cg20560862 | NAP1L4                                | 0.000420813 | 0.320041069 |
| cg01243072 |                                       | 0.003185744 | 0.320007344 |
| cg00951869 | ADCY4;RIPK3                           | 0.000420813 | 0.319967388 |
| cg18332229 | ADAP1                                 | 0.003185744 | 0.319887053 |
| cg16096836 | TXN2                                  | 0.000420813 | 0.319805874 |
| cg17098965 | ZNF217;ZNF217                         | 0.00961166  | 0.31975774  |
| cg09173565 | RPTOR;RPTOR                           | 0.000420813 | 0.319719544 |
| cg14334460 | NELF;NELF;NELF;NELF                   | 0.000420813 | 0.319713697 |
| cg07096238 |                                       | 0.005790932 | 0.31971058  |
| cg10603757 | RAC2                                  | 0.001569481 | 0.31961749  |
| cg19736994 | MAD1L1;MAD1L1;MAD1L1                  | 0.000420813 | 0.319577669 |
| cg14503357 | C9orf117                              | 0.000420813 | 0.319568055 |
| cg23204276 | AP1B1;AP1B1;SNORD125;AP1B1            | 0.002321262 | 0.319535146 |
| cg24091819 | GPR133                                | 0.005790932 | 0.319498175 |

|            |                                           |             |             |
|------------|-------------------------------------------|-------------|-------------|
| cg01490728 | SARDH;SARDH                               | 0.001569481 | 0.319474921 |
| cg25028542 | ANLN;KIAA0895                             | 0.000420813 | 0.319434867 |
| cg06627334 | PCDH12                                    | 0.004405484 | 0.319403378 |
| cg23822407 | ZHX2                                      | 0.000420813 | 0.319367541 |
| cg08189139 |                                           | 0.000420813 | 0.319362928 |
| cg24768187 | LY6G5C                                    | 0.002321262 | 0.319326057 |
| cg05448032 |                                           | 0.001038267 | 0.319321494 |
| cg15491094 |                                           | 0.000420813 | 0.319290625 |
| cg00812557 | TBC1D1                                    | 0.000420813 | 0.319263609 |
| cg07633835 | FBXO18;FBXO18                             | 0.007567702 | 0.319214334 |
| cg16801797 | NAV2;NAV2;NAV2;NAV2                       | 0.000420813 | 0.319198648 |
| cg23534245 | BMP2                                      | 0.000420813 | 0.319158766 |
| cg25152942 | MIA                                       | 0.000420813 | 0.319127106 |
| cg27278668 |                                           | 0.000420813 | 0.319098629 |
| cg03443467 | SH3BP2;SH3BP2                             | 0.000420813 | 0.319085262 |
| cg01103597 | RUNX3;RUNX3                               | 0.000420813 | 0.319060422 |
| cg00729133 | ZNF804B;MGC26647                          | 0.000420813 | 0.319052798 |
| cg14582049 | GPM6A;GPM6A;GPM6A                         | 0.002321262 | 0.319046234 |
| cg01204911 | ARHGAP26;ARHGAP26                         | 0.002321262 | 0.31902836  |
| cg14016363 |                                           | 0.000636165 | 0.318954773 |
| cg09365259 | TUBA8                                     | 0.002321262 | 0.318953773 |
| cg15404019 | CHST11                                    | 0.000420813 | 0.318944757 |
| cg22189286 | HSPB8                                     | 0.001038267 | 0.318943477 |
| cg08574558 |                                           | 0.002321262 | 0.31893231  |
| cg20407861 | AKAP12                                    | 0.000636165 | 0.318896136 |
| cg01381934 | STAB1                                     | 0.000636165 | 0.318883133 |
| cg24757978 |                                           | 0.000420813 | 0.318876961 |
| cg08730070 | COMT;COMT;COMT                            | 0.000420813 | 0.31880596  |
| cg00473501 | MPO                                       | 0.00961166  | 0.318783689 |
| cg20631351 | PALM;PALM                                 | 0.000636165 | 0.318780194 |
| cg23181573 | ATP2A3;ATP2A3;ATP2A3;ATP2A3;ATP2A3;ATP2A3 | 0.000420813 | 0.318710667 |
| cg25902229 | RPTOR;RPTOR                               | 0.000420813 | 0.318606764 |
| cg14265709 | SLCO5A1;SLCO5A1;SLCO5A1                   | 0.001569481 | 0.318593547 |
| cg11555067 | INPP4A;INPP4A;INPP4A;INPP4A               | 0.000420813 | 0.318559517 |
| cg14136214 | DAB2IP                                    | 0.001038267 | 0.318534413 |
| cg24481882 | PDE7B                                     | 0.002321262 | 0.318489349 |
| cg03739177 | ABHD15                                    | 0.001569481 | 0.318476461 |
| cg22979807 | TMEM150B                                  | 0.000420813 | 0.318472203 |
| cg08428949 | TTBK2                                     | 0.000636165 | 0.318406393 |
| cg11498228 | ARHGEF10                                  | 0.00961166  | 0.318375899 |
| cg19506849 | TCF7L2;TCF7L2;TCF7L2;TCF7L2;TCF7L2;TCF7L2 | 0.000420813 | 0.318342315 |
| cg13541073 |                                           | 0.001038267 | 0.318331138 |
| cg19641315 | P2RY6;P2RY6;P2RY6                         | 0.007567702 | 0.318315866 |
| cg18325841 | ARHGAP21                                  | 0.004405484 | 0.318300147 |
| cg22891003 | PDGFA;PDGFA                               | 0.000420813 | 0.318258565 |
| cg07727594 | SLC13A3;SLC13A3                           | 0.001569481 | 0.318206637 |
| cg03493211 | BAIAP2L1                                  | 0.000420813 | 0.318195509 |
| cg03296935 | OSTalpha                                  | 0.000420813 | 0.318109529 |
| cg18998365 | NR3C1;NR3C1;NR3C1;NR3C1;NR3C1;NR3C1;NR3C1 | 0.001569481 | 0.318055366 |
| cg16328023 | KIAA0895;KIAA0895                         | 0.003185744 | 0.318012179 |
| cg00388154 | CALML4;CALML4                             | 0.001777515 | 0.317983736 |
| cg02641801 |                                           | 0.000420813 | 0.31795193  |
| cg00387090 |                                           | 0.000420813 | 0.317887093 |
| cg04948649 | LSP1;LSP1;LSP1;LSP1                       | 0.007567702 | 0.317853412 |
| cg09169516 | MAPKAPK2;MAPKAPK2                         | 0.001569481 | 0.317830207 |
| cg02311801 | ARHGEF17                                  | 0.003185744 | 0.317761871 |
| cg13967936 | GJA4                                      | 0.001038267 | 0.31773674  |
| cg02172058 | C17orf64;C17orf64                         | 0.002321262 | 0.317718637 |
| cg22488259 | NAV1;NAV1                                 | 0.000420813 | 0.317672479 |



|            |                                                |             |             |
|------------|------------------------------------------------|-------------|-------------|
| cg01686739 | BTBD11                                         | 0.000420813 | 0.317649583 |
| cg17804886 | RASA3                                          | 0.003185744 | 0.317649567 |
| cg23036452 | ATP2B4;ATP2B4                                  | 0.004405484 | 0.317634221 |
| cg16251626 | WDR65;WDR65;WDR65;WDR65                        | 0.002321262 | 0.317631934 |
| cg26415789 | SEPT9;SEPT9;SEPT9;SEPT9;SEPT9;SEPT9;SEPT9      | 0.000420813 | 0.317613507 |
| cg05447955 | GAB2                                           | 0.001038267 | 0.317600707 |
| cg11654325 | C2orf85                                        | 0.005790932 | 0.317578107 |
| cg09241885 | C20orf118                                      | 0.000420813 | 0.3175614   |
| cg06557644 | NOD1                                           | 0.000420813 | 0.317481808 |
| cg20847746 | S100A13;S100A13;S100A13;S100A1;S100A13;S100A13 | 0.000420813 | 0.317415179 |
| cg16626670 | CLEC4G;CLEC4G                                  | 0.000420813 | 0.317348456 |
| cg10044184 |                                                | 0.001569481 | 0.317342466 |
| cg14816825 |                                                | 0.002321262 | 0.317339937 |
| cg15057046 |                                                | 0.003185744 | 0.317309483 |
| cg11408036 | DDX56                                          | 0.000420813 | 0.317280668 |
| cg09719269 |                                                | 0.001038267 | 0.317269011 |
| cg00931181 |                                                | 0.007567702 | 0.317253764 |
| cg15704408 | NFATC1;NFATC1;NFATC1;NFATC1                    | 0.000466745 | 0.317244207 |
| cg03154580 | RALB                                           | 0.000420813 | 0.317243182 |
| cg09790226 |                                                | 0.000420813 | 0.317231422 |
| cg26875137 |                                                | 0.000420813 | 0.317201697 |
| cg13221767 | UCP3;UCP3                                      | 0.000636165 | 0.317188887 |
| cg08623942 | SMURF1;SMURF1                                  | 0.002321262 | 0.317183828 |
| cg21220403 |                                                | 0.001569481 | 0.317178575 |
| cg11812071 | TNFAIP3                                        | 0.000420813 | 0.317171161 |
| cg04355222 | CD81                                           | 0.001569481 | 0.317158175 |
| cg17841440 | KLF16                                          | 0.000420813 | 0.317136371 |
| cg01984854 |                                                | 0.003185744 | 0.31713447  |
| cg13333954 |                                                | 0.000420813 | 0.317123047 |
| cg14784664 |                                                | 0.001569481 | 0.317116924 |
| cg04571584 | WNT2B                                          | 0.000420813 | 0.317088931 |
| cg18043514 |                                                | 0.002321262 | 0.317026886 |
| cg18817487 | HAL                                            | 0.000420813 | 0.316985005 |
| cg08119655 | PPFIBP2                                        | 0.001569481 | 0.316984249 |
| cg21523688 | SORD                                           | 0.001038267 | 0.316976605 |
| cg01192051 | POLG;POLG                                      | 0.001569481 | 0.316864908 |
| cg11690724 | EBF1                                           | 0.000636165 | 0.316863377 |
| cg07092805 | CRYL1                                          | 0.000466745 | 0.316768165 |
| cg12467090 | PIK3C2B                                        | 0.001038267 | 0.316693528 |
| cg13123009 | LY6G6E;LY6G6D;LY6G6E                           | 0.000420813 | 0.316610958 |
| cg16961269 |                                                | 0.000420813 | 0.316590669 |
| cg06561728 | GEMIN4                                         | 0.000636165 | 0.316590286 |
| cg26628100 | IFT140                                         | 0.000420813 | 0.31657853  |
| cg15770575 |                                                | 0.007567702 | 0.316559747 |
| cg11886358 | FLI1                                           | 0.002321262 | 0.316551213 |
| cg01964170 |                                                | 0.003613402 | 0.31652385  |
| cg01520105 | TRAF3IP2;TRAF3IP2;TRAF3IP2;TRAF3IP2;TRAF3IP2   | 0.000420813 | 0.316508582 |
| cg09685472 | CMIP                                           | 0.000420813 | 0.316463903 |
| cg17968037 | ZCWPW1                                         | 0.001569481 | 0.316449531 |
| cg10117369 | LAX1;LAX1                                      | 0.001038267 | 0.316409085 |
| cg14381712 | VPS13D;VPS13D                                  | 0.000420813 | 0.316403511 |
| cg03778138 | KRTAP12-3;C21orf29                             | 0.002321262 | 0.316394866 |
| cg07165029 | MAGI1;MAGI1;MAGI1                              | 0.001038267 | 0.316385763 |
| cg22535523 | BAHCC1                                         | 0.000466745 | 0.316379957 |
| cg04270013 |                                                | 0.007567702 | 0.316349943 |
| cg10024799 | CACNA1C;CACNA1C;CACNA1C;CACNA1C;CACNA1C        | 0.000420813 | 0.316316876 |
| cg23627828 |                                                | 0.000420813 | 0.316233755 |
| cg19060120 | RPTOR;RPTOR                                    | 0.000420813 | 0.316221001 |
| cg00223767 | UVRAG                                          | 0.000636165 | 0.316215062 |

|            |                                           |             |             |
|------------|-------------------------------------------|-------------|-------------|
| cg24033471 | CACNA1C;CACNA1C;CACNA1C;CACNA1C;CACN      | 0.002321262 | 0.316197964 |
| cg21808448 | MACF1;MACF1                               | 0.000420813 | 0.316181922 |
| cg13080487 |                                           | 0.000420813 | 0.316174706 |
| cg25673241 | RPTOR;RPTOR                               | 0.000420813 | 0.316108757 |
| cg04002220 | SPG7;SPG7                                 | 0.000420813 | 0.316088666 |
| cg08497239 |                                           | 0.000420813 | 0.316085459 |
| cg18737081 | ZMIZ1                                     | 0.007567702 | 0.316074583 |
| cg02673002 | RNF169                                    | 0.000420813 | 0.316069634 |
| cg01178099 |                                           | 0.00961166  | 0.316049307 |
| cg22133826 | RAPGEF6;RAPGEF6;RAPGEF6;RAPGEF6;RAPGE     | 0.000420813 | 0.316048193 |
| cg22455720 | TBCD                                      | 0.000420813 | 0.316036963 |
| cg23047992 | CUX1;CUX1;CUX1                            | 0.000420813 | 0.315985843 |
| cg04636331 | ADARB2                                    | 0.000420813 | 0.315978183 |
| cg27144670 | TMOD3                                     | 0.004405484 | 0.315946607 |
| cg18145759 | SH3RF3                                    | 0.000636165 | 0.315915967 |
| cg24131343 | LIMS2;GPR17;GPR17;LIMS2;LIMS2;GPR17;GPR17 | 0.000420813 | 0.315885399 |
| cg07051833 | UBE2N                                     | 0.000420813 | 0.315865246 |
| cg17973661 | MAP2K5;MAP2K5                             | 0.000420813 | 0.315821654 |
| cg08758727 | QDPR                                      | 0.001836098 | 0.315813652 |
| cg06720713 |                                           | 0.000636165 | 0.315769792 |
| cg06663615 | BAHCC1                                    | 0.004405484 | 0.31574193  |
| cg26017492 | RPS6KA2;RPS6KA2                           | 0.005790932 | 0.315654535 |
| cg07893986 | LRRFIP1;LRRFIP1                           | 0.000420813 | 0.315636033 |
| cg25252561 | CAMK2G;CAMK2G;CAMK2G;CAMK2G;CAMK2G        | 0.000420813 | 0.315593899 |
| cg12361262 |                                           | 0.002321262 | 0.315536469 |
| cg04952324 | CLIP2;CLIP2                               | 0.004405484 | 0.315509709 |
| cg11922164 | SYT15;SYT15                               | 0.000420813 | 0.315508075 |
| cg25510614 | MFSD7                                     | 0.000420813 | 0.315482235 |
| cg16432031 | DHRS3                                     | 0.000420813 | 0.315434498 |
| cg06785060 | HIVEP3;HIVEP3                             | 0.000420813 | 0.315428062 |
| cg17910470 | USP36                                     | 0.000636165 | 0.315402524 |
| cg19014730 | FKBP5;FKBP5;FKBP5;FKBP5                   | 0.000420813 | 0.315367798 |
| cg19513876 |                                           | 0.004405484 | 0.315365013 |
| cg11998307 | SCARF1;SCARF1;SCARF1;SCARF1;SCARF1        | 0.000636165 | 0.315315915 |
| cg20820876 |                                           | 0.002629558 | 0.315300021 |
| cg15817163 | SFRS8                                     | 0.002321262 | 0.315201997 |
| cg08927754 | ANKRD11                                   | 0.001038267 | 0.315058475 |
| cg12537379 | CUX1;CUX1;CUX1                            | 0.000420813 | 0.315045828 |
| cg21840948 | SNAI1                                     | 0.000420813 | 0.314968515 |
| cg26672202 | GAB2;GAB2                                 | 0.002321262 | 0.314963134 |
| cg09965419 | DDR1;DDR1                                 | 0.001569481 | 0.31487078  |
| cg01749539 | SEPT9;SEPT9;SEPT9;SEPT9;SEPT9;SEPT9;SEPT9 | 0.000420813 | 0.314836445 |
| cg18951367 | SPNS3                                     | 0.000420813 | 0.314808914 |
| cg20308817 | CLEC11A                                   | 0.004405484 | 0.314806374 |
| cg12800962 |                                           | 0.00961166  | 0.31475743  |
| cg17420028 | HDAC4                                     | 0.000420813 | 0.314733138 |
| cg21702188 | STX5;NXF1;NXF1                            | 0.001569481 | 0.31457994  |
| cg04160876 | MYH11;MYH11;MYH11;MYH11                   | 0.004405484 | 0.314577962 |
| cg20573931 | IL7                                       | 0.000420813 | 0.314548982 |
| cg22616343 | TNXB;TNXB                                 | 0.000420813 | 0.314547703 |
| cg08268075 | INSC                                      | 0.000420813 | 0.314540642 |
| cg00402381 |                                           | 0.004405484 | 0.314526032 |
| cg12700039 | TBC1D16                                   | 0.000420813 | 0.314467474 |
| cg14688662 |                                           | 0.000420813 | 0.314388313 |
| cg14310198 | RAPGEF1;RAPGEF1                           | 0.003004124 | 0.314376019 |
| cg00074771 | WDR76;WDR76                               | 0.007567702 | 0.31434405  |
| cg24787238 | MAD1L1;MAD1L1;MAD1L1                      | 0.004405484 | 0.314279756 |
| cg00569418 | C19orf76;C19orf76                         | 0.007567702 | 0.314224441 |
| cg22546130 | COMT;COMT;COMT;COMT                       | 0.000636165 | 0.314137544 |

|            |                                           |                   |             |
|------------|-------------------------------------------|-------------------|-------------|
| cg21504005 | CDYL;CDYL;CDYL;CDYL                       | 0.000420813       | 0.314106598 |
| cg11858213 | CRTAP                                     | 0.000420813       | 0.314084369 |
| cg14029001 | CCND3;CCND3                               | 0.000420813       | 0.314075738 |
| cg25431535 |                                           | 0.000420813       | 0.31403813  |
| cg24190223 | CSPP1;CSPP1                               | 0.007567702       | 0.313987059 |
| cg27635976 | CBFA2T3;CBFA2T3                           | 0.000636165       | 0.313951419 |
| cg08727202 | MPST;MPST;TST;MPST;MPST                   | 0.000420813       | 0.313890287 |
| cg06517940 | LCK                                       | 0.001777515       | 0.313889039 |
| cg14349937 | RNLS;RNLS                                 | 0.005790932       | 0.313860954 |
| cg17168630 | PLAUR;PLAUR;PLAUR                         | 0.001038267       | 0.313853664 |
| cg27573935 | C3orf54                                   | 0.001569481       | 0.313839182 |
| cg08112313 | XRCC1                                     | 0.000420813       | 0.313782841 |
| cg01115058 | MFSD3                                     | 0.00961166        | 0.313781359 |
| cg20565082 |                                           | 0.000420813       | 0.313705614 |
| cg05412222 | PACS2;PACS2                               | 0.001038267       | 0.313606105 |
| cg06855137 | FAM38A                                    | 0.005790932       | 0.313597071 |
| cg07380540 |                                           | 0.000420813       | 0.313545565 |
| cg14152591 | FAM107B                                   | 0.000420813       | 0.313532651 |
| cg13707005 | CUGBP2;CUGBP2;CUGBP2;CUGBP2               | 0.001038267       | 0.313467036 |
| cg14037769 |                                           | 0.001038267       | 0.313342467 |
| cg15636519 | STAT4                                     | 0.001038267       | 0.313269688 |
| cg21301258 | RCAN1;RCAN1;RCAN1                         | 0.000420813       | 0.313139302 |
| cg16155207 |                                           | 0.000420813       | 0.313078726 |
| cg00421624 | SLC27A3                                   | 0.000420813       | 0.313027397 |
| cg20485874 | LRRC17;FBXL13;LRRC17;LRRC17;LRRC17;FBXL13 | 0.000420813       | 0.313023115 |
| cg00972246 |                                           | 0.001569481       | 0.312930488 |
| cg12692386 | BAHCC1                                    | 0.001038267       | 0.312876511 |
| cg23984176 |                                           | 0.001569481       | 0.312860344 |
| cg20956114 | PTPRN2;PTPRN2;PTPRN2                      | 0.005790932       | 0.312837442 |
| cg12032655 | CD177                                     | 0.00961166        | 0.312827926 |
| cg07855575 |                                           | 0.001569481       | 0.312811517 |
| cg06925389 |                                           | 0.001038267       | 0.312787262 |
| cg12563847 |                                           | 0.000420813       | 0.312773854 |
| cg21746120 | LRP5                                      | 0.000420813       | 0.312765732 |
| cg06307913 | PRDM8;PRDM8;PRDM8                         | 0.004405484       | 0.312765614 |
| cg26632171 | MSGN1                                     | 0.00961166        | 0.312750703 |
| cg18739367 |                                           | 0.001038267       | 0.312659116 |
| cg04018023 |                                           | 0.001836098       | 0.312515517 |
| cg26079706 | SEPT9;SEPT9;SEPT9;SEPT9;SEPT9             | 0.00961166        | 0.312440816 |
| cg04139359 | RNF220                                    | 0.000636165       | 0.312400781 |
| cg14692552 | RINL                                      | 0.000420813       | 0.312386051 |
| cg18866792 |                                           | 4-Mar 0.000420813 | 0.312334997 |
| cg12550597 | FAM129C                                   | 0.004405484       | 0.312291313 |
| cg20360395 |                                           | 0.005790932       | 0.312163479 |
| cg19186105 |                                           | 0.000420813       | 0.312152057 |
| cg15612257 |                                           | 0.000420813       | 0.31211208  |
| cg17300047 | RCBTB2                                    | 0.000420813       | 0.312103661 |
| cg02039171 | CEBPE                                     | 0.003185744       | 0.31208129  |
| cg14840966 | CDC42BPB                                  | 0.007567702       | 0.312066363 |
| cg19266014 | MAD1L1;MAD1L1;MAD1L1                      | 0.000420813       | 0.312056674 |
| cg09007354 | GLIS1                                     | 0.005790932       | 0.31195994  |
| cg22618337 | C10orf81                                  | 0.007567702       | 0.311936504 |
| cg14495033 | EHMT1                                     | 0.000532358       | 0.311847908 |
| cg00436219 |                                           | 0.000420813       | 0.311820748 |
| cg18597411 | CUL1                                      | 0.000420813       | 0.311817016 |
| cg03823431 | SLC38A10;SLC38A10                         | 0.001569481       | 0.311775328 |
| cg21901847 | NOS3                                      | 0.007567702       | 0.311751808 |
| cg10233454 | LRP1                                      | 0.000636165       | 0.311701298 |
| cg12810800 |                                           | 0.001569481       | 0.311649444 |

|            |                                          |             |             |
|------------|------------------------------------------|-------------|-------------|
| cg08161931 | PLEC1;PLEC1;PLEC1                        | 0.000420813 | 0.311611967 |
| cg14703454 | HHLA2                                    | 0.002321262 | 0.311610314 |
| cg26907472 | TMCO7                                    | 0.001038267 | 0.311591968 |
| cg07502892 |                                          | 0.000420813 | 0.3115856   |
| cg21648069 | ERC1;ERC1;ERC1;ERC1;ERC1                 | 0.007567702 | 0.311573949 |
| cg06353069 | RAB17                                    | 0.002321262 | 0.311535353 |
| cg21466229 | SNTG1                                    | 0.002321262 | 0.311496514 |
| cg26507422 | CBFA2T3;CBFA2T3                          | 0.000420813 | 0.311460397 |
| cg21739584 | BCL6;BCL6;BCL6                           | 0.002321262 | 0.311408421 |
| cg04265492 | BAI2                                     | 0.000420813 | 0.311319563 |
| cg06300222 | ZFAND3                                   | 0.002321262 | 0.311223346 |
| cg24215776 |                                          | 0.000420813 | 0.311152161 |
| cg22687766 |                                          | 0.002321262 | 0.311129115 |
| cg10035737 | ADAM11                                   | 0.001038267 | 0.311099366 |
| cg19649018 |                                          | 0.007567702 | 0.311083382 |
| cg18796319 | DPCR1                                    | 0.000420813 | 0.311072433 |
| cg04871173 | MAD1L1;MAD1L1;MAD1L1                     | 0.001038267 | 0.311053284 |
| cg22648375 | PIK3CG                                   | 0.000636165 | 0.311023729 |
| cg03571301 | DUS1L                                    | 0.000420813 | 0.310984996 |
| cg03977385 |                                          | 0.000420813 | 0.310956913 |
| cg04337270 | DHX15                                    | 0.004405484 | 0.310947594 |
| cg11225330 | UBE2J2;UBE2J2;LOC100128842;UBE2J2;UBE2J2 | 0.005790932 | 0.310927363 |
| cg12022621 | LAX1;LAX1;LAX1                           | 0.001038267 | 0.310881074 |
| cg00589002 | TP73;TP73;TP73;TP73                      | 0.000636165 | 0.310804594 |
| cg11535839 |                                          | 0.005790932 | 0.310798856 |
| cg00516966 | ALDH3A1;ALDH3A1                          | 0.000420813 | 0.310791795 |
| cg18908419 | VCL;VCL                                  | 0.002321262 | 0.310764828 |
| cg01858712 | SNX29                                    | 0.002321262 | 0.310742823 |
| cg15224459 | METRNL                                   | 0.007567702 | 0.310742359 |
| cg10303721 |                                          | 0.000420813 | 0.31072353  |
| cg24577455 | PRKCZ;PRKCZ;PRKCZ                        | 0.003185744 | 0.310678085 |
| cg22850451 | MAP1S                                    | 0.000420813 | 0.310677244 |
| cg11478249 | EXOC3                                    | 0.000420813 | 0.310672193 |
| cg24199006 | ITPRIP                                   | 0.002629558 | 0.310645604 |
| cg14375205 |                                          | 0.001569481 | 0.310644826 |
| cg07273304 | ANXA13;ANXA13                            | 0.001038267 | 0.310639987 |
| cg24035043 | HHIPL1;HHIPL1                            | 0.000420813 | 0.310627961 |
| cg25172145 | PPM1F                                    | 0.000420813 | 0.310586872 |
| cg05549611 | NCRNA00114                               | 0.000420813 | 0.310574288 |
| cg10785340 | H2AFY;H2AFY;H2AFY;H2AFY                  | 0.000420813 | 0.310522466 |
| cg15987934 |                                          | 0.000420813 | 0.310496404 |
| cg16583987 |                                          | 0.002321262 | 0.310453452 |
| cg13569051 | GSN;GSN;GSN;GSN;GSN;GSN;GSN              | 0.005790932 | 0.310417536 |
| cg02030275 |                                          | 0.001569481 | 0.310390317 |
| cg21775279 | XKR8;SMPDL3B                             | 0.001038267 | 0.310387521 |
| cg08887025 | SMYD3;SMYD3                              | 0.000420813 | 0.310384222 |
| cg10859192 | ATP5G2                                   | 0.000636165 | 0.310369465 |
| cg02304580 |                                          | 0.000420813 | 0.31030781  |
| cg06516476 | NT5E                                     | 0.005790932 | 0.310296629 |
| cg04821129 | ATF6B;ATF6B                              | 0.000420813 | 0.310285342 |
| cg15323828 | TMEM63A                                  | 0.000420813 | 0.310194255 |
| cg22713958 | LGALS3BP                                 | 0.005790932 | 0.310185078 |
| cg14483391 | HTR3D;HTR3D;HTR3D                        | 0.001569481 | 0.310127258 |
| cg03536664 | UQCRC1                                   | 0.000420813 | 0.310126665 |
| cg07762961 | NLRC3                                    | 0.000420813 | 0.310122385 |
| cg12999579 |                                          | 0.000420813 | 0.310084459 |
| cg01505878 |                                          | 0.000420813 | 0.310077407 |
| cg06647600 |                                          | 0.000420813 | 0.310058363 |
| cg26039623 | RBM47;RBM47                              | 0.002321262 | 0.310054122 |

|            |                                            |             |             |
|------------|--------------------------------------------|-------------|-------------|
| cg17565299 | TMEM129;TMEM129                            | 0.007567702 | 0.310026434 |
| cg15953461 |                                            | 0.000420813 | 0.310017961 |
| cg09595020 | IQCE;IQCE                                  | 0.000636165 | 0.309977105 |
| cg15489196 | PXDN                                       | 0.000420813 | 0.309960481 |
| cg20651456 | RPL23AP53                                  | 0.000420813 | 0.309929489 |
| cg19179572 | HEXDC;C17orf101;C17orf101                  | 0.001569481 | 0.309885513 |
| cg14137939 | CCDC89                                     | 0.000420813 | 0.309851477 |
| cg11826008 | CPNE1;CPNE1;CPNE1;CPNE1;CPNE1;RBM12;CP     | 0.002321262 | 0.309782349 |
| cg04245026 | ADARB2                                     | 0.000420813 | 0.309762046 |
| cg17097293 | PIP5K1C                                    | 0.000420813 | 0.309644566 |
| cg25482983 | COL11A2;COL11A2;COL11A2                    | 0.001569481 | 0.309591972 |
| cg01880929 | CRIM1                                      | 0.000636165 | 0.309562416 |
| cg07676145 | CDH23                                      | 0.007567702 | 0.309524245 |
| cg16211990 |                                            | 0.002321262 | 0.309516928 |
| cg06892907 |                                            | 0.000420813 | 0.309498513 |
| cg05962522 |                                            | 0.000420813 | 0.309497235 |
| cg25963429 | CREB3L1                                    | 0.000420813 | 0.309467823 |
| cg23815312 | ARHGAP22                                   | 0.005790932 | 0.309466806 |
| cg16592101 |                                            | 0.005790932 | 0.309432169 |
| cg11521563 | MCF2L;MCF2L                                | 0.000420813 | 0.309422087 |
| cg02223351 | CDH5                                       | 0.000466745 | 0.309311632 |
| cg26840062 | C5orf62                                    | 0.001569481 | 0.309263889 |
| cg19180827 | MSH2                                       | 0.001038267 | 0.309249849 |
| cg19682835 | FAM116B                                    | 0.000636165 | 0.309200172 |
| cg02108620 | ULK4                                       | 0.000420813 | 0.309181614 |
| cg05854892 |                                            | 0.000420813 | 0.309124135 |
| cg00870449 | SLC8A1;SLC8A1;SLC8A1;SLC8A1                | 0.004405484 | 0.30910611  |
| cg02397552 | CLN5                                       | 0.000420813 | 0.309057221 |
| cg26723162 |                                            | 0.000420813 | 0.309007583 |
| cg11838898 | ARHGEF4;ARHGEF4                            | 0.004405484 | 0.308986    |
| cg22676000 | CEACAM6                                    | 0.004405484 | 0.308953625 |
| cg01861740 |                                            | 0.000466745 | 0.308918011 |
| cg14414903 | HDAC4                                      | 0.001038267 | 0.308899355 |
| cg19190519 |                                            | 0.003185744 | 0.308884644 |
| cg01936091 | ABLIM2;ABLIM2;ABLIM2;ABLIM2;ABLIM2;ABLIM2; | 0.000420813 | 0.308866192 |
| cg20732076 | TRERF1                                     | 0.001038267 | 0.308865128 |
| cg21653105 | TG;SLA;SLA                                 | 0.000420813 | 0.308821024 |
| cg13987029 | VOPP1                                      | 0.000420813 | 0.308818755 |
| cg19419650 | EVI5L;EVI5L                                | 0.005790932 | 0.308790859 |
| cg08615650 | ADRBK1                                     | 0.000636165 | 0.308772976 |
| cg13254586 |                                            | 0.001038267 | 0.308733538 |
| cg23902994 | ARHGEF10                                   | 0.001038267 | 0.30871597  |
| cg04848957 |                                            | 0.000420813 | 0.308683938 |
| cg26955290 | ASGR2;ASGR2;ASGR2;ASGR2                    | 0.00961166  | 0.308633886 |
| cg18775149 | ITGA2                                      | 0.000420813 | 0.308611472 |
| cg16015285 |                                            | 0.007567702 | 0.308606447 |
| cg16144314 | ADARB2                                     | 0.004405484 | 0.308560312 |
| cg16361867 | GRIK4                                      | 0.007567702 | 0.308537877 |
| cg09826895 | DENND2D                                    | 0.003185744 | 0.308475588 |
| cg10566660 |                                            | 0.001569481 | 0.308445199 |
| cg05386769 | TNS1                                       | 0.002321262 | 0.308388068 |
| cg27635453 |                                            | 0.002321262 | 0.308373241 |
| cg00854273 |                                            | 0.000420813 | 0.308352426 |
| cg09804858 | TRERF1                                     | 0.000420813 | 0.308343895 |
| cg02769104 | FAM46B                                     | 0.000420813 | 0.308334081 |
| cg23754934 | MS4A4A                                     | 0.002321262 | 0.308315169 |
| cg26332052 | UNK                                        | 0.002321262 | 0.308307726 |
| cg04510459 |                                            | 0.004405484 | 0.308300508 |
| cg05264101 | FLJ45079                                   | 0.001569481 | 0.308284432 |

|            |                                           |             |             |
|------------|-------------------------------------------|-------------|-------------|
| cg12361772 | STX8                                      | 0.000420813 | 0.308261779 |
| cg24040155 | LRP5                                      | 0.004405484 | 0.308219929 |
| cg10932907 | TMEM45B                                   | 0.00961166  | 0.308212623 |
| cg05899984 |                                           | 0.001038267 | 0.308122078 |
| cg26580761 | MAD1L1;MAD1L1;MAD1L1                      | 0.000636165 | 0.308096954 |
| cg15076811 |                                           | 0.000420813 | 0.308090475 |
| cg24750513 | BIN1;BIN1;BIN1;BIN1;BIN1;BIN1;BIN1;BIN1;B | 0.001038267 | 0.308033991 |
| cg03888814 | DNAH7                                     | 0.003185744 | 0.308018123 |
| cg18281910 | EDARADD;EDARADD                           | 0.00961166  | 0.308014036 |
| cg15561778 | GAB1;GAB1                                 | 0.000420813 | 0.308008584 |
| cg24101039 | SP4                                       | 0.001038267 | 0.307947987 |
| cg13436378 | DYSF;DYSF;DYSF;DYSF;DYSF;DYSF;DYSF;DYSF   | 0.000636165 | 0.307921857 |
| cg05609039 |                                           | 0.000420813 | 0.30791873  |
| cg12218747 |                                           | 0.000420813 | 0.307899196 |
| cg05136737 |                                           | 0.002321262 | 0.307879359 |
| cg22478679 | ADPRHL1;ADPRHL1                           | 0.002321262 | 0.307848433 |
| cg26747290 |                                           | 0.000420813 | 0.307788984 |
| cg22633932 | SETD7                                     | 0.000420813 | 0.307787118 |
| cg21338225 | C7orf41                                   | 0.001038267 | 0.307750256 |
| cg18815120 | EGLN1                                     | 0.007567702 | 0.307742516 |
| cg05073720 | PHLPP1                                    | 0.000420813 | 0.307692195 |
| cg02788021 | KATNAL1                                   | 0.000420813 | 0.307689652 |
| cg23025804 | SVIL;SVIL                                 | 0.004405484 | 0.307683006 |
| cg01419914 | BAHCC1                                    | 0.003185744 | 0.307659808 |
| cg17002510 | ARHGEF10                                  | 0.001038267 | 0.307644241 |
| cg12743398 | SULT1A2                                   | 0.001038267 | 0.307638855 |
| cg01226748 | PXMP2                                     | 0.000420813 | 0.307603868 |
| cg15006828 |                                           | 0.007567702 | 0.307599789 |
| cg04951819 | CCDC77;CCDC77;CCDC77;CCDC77               | 0.001038267 | 0.307572712 |
| cg11724055 | HNRNPR;HNRNPR;HNRNPR;HNRNPR               | 0.000420813 | 0.307564618 |
| cg17769009 | RPL23AP53                                 | 0.000420813 | 0.307524903 |
| cg03531687 | RARB;RARB                                 | 0.000636165 | 0.307520794 |
| cg19081470 |                                           | 0.000420813 | 0.307434253 |
| cg21128953 | MTUS2;MTUS2                               | 0.003185744 | 0.307373378 |
| cg07956000 |                                           | 0.003185744 | 0.307373275 |
| cg04028874 | ZNF683;ZNF683                             | 0.002629558 | 0.307369177 |
| cg15089620 | ARHGAP26;ARHGAP26                         | 0.000420813 | 0.307239682 |
| cg05582286 |                                           | 0.000420813 | 0.307238602 |
| cg18757228 | SCARA5                                    | 0.000420813 | 0.307194471 |
| cg21160357 | TNS3                                      | 0.000420813 | 0.307190332 |
| cg00155732 | SLC2A5;SLC2A5;SLC2A5                      | 0.001569481 | 0.307188423 |
| cg11944933 | FAM167A                                   | 0.001038267 | 0.30716027  |
| cg05242065 | C2orf89                                   | 0.004405484 | 0.307104587 |
| cg04837616 | FLJ45079                                  | 0.001038267 | 0.307070103 |
| cg22924563 |                                           | 0.000420813 | 0.307017359 |
| cg01561157 | TBCD                                      | 0.001569481 | 0.307007762 |
| cg02480666 | GJA4                                      | 0.007567702 | 0.306879763 |
| cg02442640 | SEPT9;SEPT9;SEPT9;SEPT9;SEPT9;SEPT9       | 0.005790932 | 0.30685038  |
| cg23230158 | GALNT2                                    | 0.000420813 | 0.306841213 |
| cg26906737 | TMEM206                                   | 0.000420813 | 0.30683688  |
| cg05075308 | IRF2                                      | 0.001569481 | 0.306812964 |
| cg26874367 |                                           | 0.000420813 | 0.30673707  |
| cg08363067 | ABCC1;ABCC1;ABCC1;ABCC1;ABCC1             | 0.000636165 | 0.306728043 |
| cg02472906 | CA5A                                      | 0.000420813 | 0.306724902 |
| cg03620886 | ZGLP1                                     | 0.000636165 | 0.306581469 |
| cg02947125 |                                           | 0.001569481 | 0.306518802 |
| cg21880392 | FRZB                                      | 0.000636165 | 0.306472716 |
| cg15306012 | EXOC3L                                    | 0.001038267 | 0.306465872 |
| cg00262054 | MYO18A;MYO18A                             | 0.000420813 | 0.306449216 |

|            |                                         |             |             |
|------------|-----------------------------------------|-------------|-------------|
| cg13630878 | MTMR15                                  | 0.000420813 | 0.306445959 |
| cg05233155 |                                         | 0.000420813 | 0.306362386 |
| cg11452501 | LY6G5C                                  | 0.000420813 | 0.306301792 |
| cg19353947 | ZEB2;ZEB2;ZEB2                          | 0.002321262 | 0.306264121 |
| cg14733031 | B3GNT3                                  | 0.000420813 | 0.306238046 |
| cg09273716 |                                         | 0.005790932 | 0.306207871 |
| cg06872019 |                                         | 0.007567702 | 0.306184041 |
| cg15706657 | GPR31                                   | 0.000719053 | 0.306171611 |
| cg09154256 | RAB1A;RAB1A                             | 0.003185744 | 0.306147402 |
| cg02551745 |                                         | 0.002321262 | 0.306136341 |
| cg24927174 | SHC1;SHC1;SHC1;SHC1                     | 0.007567702 | 0.306127254 |
| cg19097280 | LRRN4                                   | 0.001569481 | 0.306114557 |
| cg24152264 |                                         | 0.000420813 | 0.306042824 |
| cg07054502 | ANKRD11                                 | 0.000420813 | 0.305991587 |
| cg04879645 | LMF1                                    | 0.002321262 | 0.305984727 |
| cg11810135 | FCRL1;FCRL1;FCRL1                       | 0.000420813 | 0.305942283 |
| cg08795084 | DEPDC1B;DEPDC1B                         | 0.000420813 | 0.305940709 |
| cg15452381 | HIVEP3;HIVEP3                           | 0.001038267 | 0.305922541 |
| cg00101457 | CUGBP2;CUGBP2;CUGBP2;CUGBP2             | 0.000636165 | 0.305915633 |
| cg10104480 | ZFH3;ZFH3                               | 0.000636165 | 0.305912781 |
| cg12821702 |                                         | 0.000636165 | 0.305907054 |
| cg07589034 |                                         | 0.00961166  | 0.305906883 |
| cg09026253 | IFITM1                                  | 0.00961166  | 0.305891189 |
| cg16277071 |                                         | 0.000420813 | 0.305858857 |
| cg23427362 | CACNA1C;CACNA1C;CACNA1C;CACNA1C;CACNA1C | 0.000420813 | 0.30583245  |
| cg14641757 | C21orf96;RUNX1                          | 0.000420813 | 0.305817063 |
| cg04261556 | ITGB8                                   | 0.000420813 | 0.305767264 |
| cg21877464 | SPARC                                   | 0.001569481 | 0.305758779 |
| cg26329274 | ITK                                     | 0.007567702 | 0.305702803 |
| cg15302379 | KAZALD1;KAZALD1                         | 0.002321262 | 0.305696568 |
| cg06362313 | GAPDH                                   | 0.000420813 | 0.305673271 |
| cg04369903 |                                         | 0.001038267 | 0.305664142 |
| cg12962778 | ZNF385A;ZNF385A;ZNF385A;ZNF385A         | 0.007567702 | 0.305646175 |
| cg08875605 | ETV5                                    | 0.001569481 | 0.305593099 |
| cg24575128 | NISCH                                   | 0.007567702 | 0.305555661 |
| cg09504131 | STK24;STK24                             | 0.003185744 | 0.305544654 |
| cg27526649 |                                         | 0.005790932 | 0.305537474 |
| cg18281939 | LHFPL2                                  | 0.000636165 | 0.305466483 |
| cg03252770 |                                         | 0.000636165 | 0.305457522 |
| cg00945443 | MTHFD1L                                 | 0.000420813 | 0.305416377 |
| cg14895029 | GNA12                                   | 0.000420813 | 0.305399425 |
| cg09803959 | RPTOR;RPTOR                             | 0.001038267 | 0.305395845 |
| cg00502597 | FGGY;FGGY                               | 0.000420813 | 0.305377361 |
| cg14139311 |                                         | 0.00961166  | 0.30534794  |
| cg14861545 |                                         | 0.001569481 | 0.305314536 |
| cg15507500 | SLC27A1                                 | 0.003185744 | 0.305271006 |
| cg26120813 |                                         | 0.000636165 | 0.305244173 |
| cg12434889 | PTPRN2;PTPRN2;PTPRN2                    | 0.004405484 | 0.305231786 |
| cg12592276 |                                         | 0.002321262 | 0.305182935 |
| cg16928487 | SREBF1;SREBF1                           | 0.000420813 | 0.305176967 |
| cg18062205 | KCNG1                                   | 0.000420813 | 0.305174241 |
| cg20952652 | UXS1                                    | 0.000420813 | 0.305163715 |
| cg04364752 | GALNS                                   | 0.003185744 | 0.305083539 |
| cg24924502 | AATK                                    | 0.003185744 | 0.304930143 |
| cg18396992 |                                         | 0.00961166  | 0.304920511 |
| cg01522095 | GGA2                                    | 0.000420813 | 0.304898384 |
| cg13629388 | FAM120B                                 | 0.000420813 | 0.304871224 |
| cg07711397 | SH2D4B                                  | 0.000420813 | 0.304870458 |
| cg26217846 | DIAPH1;DIAPH1                           | 0.004405484 | 0.304766938 |

|            |                                          |             |             |
|------------|------------------------------------------|-------------|-------------|
| cg01046511 | KDM6B                                    | 0.001777515 | 0.304705882 |
| cg10122452 | SMARCB1;SMARCB1                          | 0.001569481 | 0.304701505 |
| cg06270401 | DYRK4                                    | 0.000420813 | 0.304677388 |
| cg19650253 | PTGDR                                    | 0.004405484 | 0.304657855 |
| cg01097897 | PPM1H                                    | 0.000420813 | 0.304629892 |
| cg13377102 | KCNAB3                                   | 0.00961166  | 0.304622096 |
| cg23288563 | NDRG2;NDRG2;NDRG2;NDRG2;NDRG2;NDRG2;N    | 0.000420813 | 0.304604297 |
| cg15151059 | SETDB1;SETDB1                            | 0.003185744 | 0.304596856 |
| cg26035892 |                                          | 0.000420813 | 0.304580293 |
| cg22344162 | CREG1                                    | 0.002321262 | 0.304533973 |
| cg06779553 | TOX                                      | 0.000636165 | 0.304510424 |
| cg04120413 | HLTF;HLTF                                | 0.000420813 | 0.304508978 |
| cg09774649 | C4orf23                                  | 0.000420813 | 0.304426337 |
| cg11308170 | SNORA1;SNORA8;SNORD5;SNORA18             | 0.000420813 | 0.304383489 |
| cg01135648 | DCAF4L1                                  | 0.003185744 | 0.304314128 |
| cg02538833 | CLSTN1;CLSTN1                            | 0.001038267 | 0.304301856 |
| cg17919667 | FGFR4;FGFR4                              | 0.002321262 | 0.304292836 |
| cg19410609 |                                          | 0.000420813 | 0.304273142 |
| cg01455981 | UBXN10                                   | 0.003185744 | 0.304268033 |
| cg04445427 |                                          | 0.001038267 | 0.304253892 |
| cg16616918 | SMYD4                                    | 0.003185744 | 0.304242726 |
| cg04903159 |                                          | 0.000420813 | 0.30421086  |
| cg00534022 |                                          | 0.000420813 | 0.304204902 |
| cg04372182 |                                          | 0.000420813 | 0.304186402 |
| cg12759523 | CYFIP1                                   | 0.001569481 | 0.30418211  |
| cg17112975 | SEPT9;SEPT9;SEPT9;SEPT9;SEPT9            | 0.000636165 | 0.304177203 |
| cg09665332 | SGIP1                                    | 0.001569481 | 0.304127607 |
| cg08929197 | ZDHHC14;ZDHHC14                          | 0.000420813 | 0.304072684 |
| cg26738160 | RAPSN;RAPSN                              | 0.003185744 | 0.304023622 |
| cg22959409 | LRRC33                                   | 0.001038267 | 0.303942142 |
| cg10341242 | ADCY7                                    | 0.002321262 | 0.303919186 |
| cg08822625 | NEDD9                                    | 0.000420813 | 0.303890694 |
| cg02522367 | LCN6                                     | 0.001569481 | 0.303875167 |
| cg05824594 | CACNA1C;CACNA1C;CACNA1C;CACNA1C;CACN     | 0.000420813 | 0.303860367 |
| cg07964097 |                                          | 0.000420813 | 0.303859487 |
| cg21971799 |                                          | 0.000636165 | 0.303837414 |
| cg02290880 | CTSE;CTSE                                | 0.000636165 | 0.303815384 |
| cg00158770 | CSGALNACT1;CSGALNACT1;CSGALNACT1         | 0.004405484 | 0.303725116 |
| cg26684673 | UBASH3B                                  | 0.000636165 | 0.303713421 |
| cg19210858 | ELF2                                     | 0.007567702 | 0.303669069 |
| cg04071430 |                                          | 0.000420813 | 0.303641917 |
| cg24592782 | CTNNBIP1;CTNNBIP1                        | 0.000420813 | 0.303617128 |
| cg06615154 | S100A3                                   | 0.000420813 | 0.303613334 |
| cg10521711 |                                          | 0.000466745 | 0.303586496 |
| cg02466892 |                                          | 0.001038267 | 0.303573025 |
| cg09228833 | ZNF217                                   | 0.001038267 | 0.30357033  |
| cg19382136 |                                          | 0.002629558 | 0.30347904  |
| cg19107511 |                                          | 0.004405484 | 0.303478272 |
| cg00917471 | LEPRE1;LEPRE1                            | 0.000420813 | 0.30347679  |
| cg06372654 | IMPDH1;IMPDH1;IMPDH1;IMPDH1;IMPDH1;IMPDH | 0.000420813 | 0.303475711 |
| cg00384553 |                                          | 0.000420813 | 0.303472556 |
| cg15420926 | EFR3A                                    | 0.004405484 | 0.303471442 |
| cg05077231 | MLNR                                     | 0.005790932 | 0.303430831 |
| cg11791710 | DOCK1                                    | 0.000420813 | 0.303417122 |
| cg14758065 |                                          | 0.000636165 | 0.303385343 |
| cg03225003 | NPHP4                                    | 0.000420813 | 0.303358051 |
| cg00239117 | UBE2F                                    | 0.000420813 | 0.303346412 |
| cg16672637 | FOXJ1                                    | 0.000420813 | 0.303341667 |
| cg08123339 |                                          | 0.005790932 | 0.303322842 |



|            |                                 |             |             |
|------------|---------------------------------|-------------|-------------|
| cg23416081 | FKBP5                           | 0.002321262 | 0.303285124 |
| cg19881557 |                                 | 0.000420813 | 0.303282516 |
| cg08463932 | LAPTM5                          | 0.000420813 | 0.303260381 |
| cg03889700 | ADD1;ADD1;ADD1;ADD1             | 0.00961166  | 0.303170869 |
| cg07574163 |                                 | 0.004405484 | 0.303161641 |
| cg08580187 | NECAB2                          | 0.002321262 | 0.303155574 |
| cg08477158 | BCAS3;BCAS3                     | 0.000636165 | 0.303048591 |
| cg16499923 | DENND3                          | 0.007567702 | 0.302729062 |
| cg15009090 |                                 | 0.000636165 | 0.302686022 |
| cg06976521 | SNORD125;AP1B1;AP1B1;AP1B1      | 0.000420813 | 0.302677912 |
| cg00812761 | SCFD2                           | 0.002321262 | 0.302657114 |
| cg25688583 | TCF12;TCF12;TCF12;TCF12;TCF12   | 0.000466745 | 0.302636081 |
| cg20482280 | MTA1                            | 0.007567702 | 0.302611627 |
| cg04498801 | MFSD10;MFSD10                   | 0.000420813 | 0.302527494 |
| cg26250585 | MS4A6A;MS4A6A;MS4A6A            | 0.000420813 | 0.302513046 |
| cg11014468 | DCP1A                           | 0.000420813 | 0.302482369 |
| cg16681421 |                                 | 0.003185744 | 0.302476167 |
| cg25156198 | CDK6;CDK6                       | 0.000420813 | 0.302473238 |
| cg02750743 | TESC;TESC;TESC                  | 0.005790932 | 0.302464183 |
| cg05869699 | TSPAN14;TSPAN14                 | 0.000420813 | 0.302451354 |
| cg06985664 | MET;MET                         | 0.000420813 | 0.30244658  |
| cg02543462 | IL1RN;IL1RN;IL1RN;IL1RN         | 0.007567702 | 0.302411363 |
| cg11333968 | PPFIBP2                         | 0.002321262 | 0.302394708 |
| cg12271317 | LEF1;LEF1;LEF1;LEF1             | 0.000636165 | 0.302383739 |
| cg12798970 |                                 | 0.00961166  | 0.302324203 |
| cg13698860 | BIK                             | 0.000466745 | 0.302293268 |
| cg04618171 | HPCAL1;HPCAL1                   | 0.001038267 | 0.302250711 |
| cg06469570 | ACOX3;ACOX3                     | 0.003185744 | 0.30216628  |
| cg14829516 | THRA;NR1D1                      | 0.000420813 | 0.302159833 |
| cg26771582 | FBXO31;FBXO31                   | 0.000636165 | 0.302157107 |
| cg21186560 |                                 | 0.004405484 | 0.302145403 |
| cg26288715 | MYB;MYB;MYB;MYB;MYB;MYB;MYB;MYB | 0.000420813 | 0.302091178 |
| cg09888186 | RGL1                            | 0.000636165 | 0.302051925 |
| cg06899483 |                                 | 0.000719053 | 0.302043934 |
| cg09123760 | DIABLO;DIABLO;DIABLO;DIABLO     | 0.000420813 | 0.302020345 |
| cg09510202 | PHACTR1                         | 0.000636165 | 0.302018472 |
| cg02824983 |                                 | 0.002321262 | 0.301980528 |
| cg01924561 | SLC2A1                          | 0.005790932 | 0.301974369 |
| cg16983110 | PTPRK;PTPRK                     | 0.001569481 | 0.301971168 |
| cg25865120 | DUT;DUT;DUT                     | 0.000420813 | 0.301948758 |
| cg23251200 |                                 | 0.001038267 | 0.301935645 |
| cg04590303 | IFT140                          | 0.000420813 | 0.301896537 |
| cg03427849 | RWDD4A;C4orf41;C4orf41          | 0.003185744 | 0.301874784 |
| cg13673960 | TACC3                           | 0.005790932 | 0.301869516 |
| cg01827761 | KLHDC7A                         | 0.003185744 | 0.301862009 |
| cg18909389 | CLIC1                           | 0.000420813 | 0.301814772 |
| cg18915456 |                                 | 0.000420813 | 0.301803666 |
| cg08490349 | MPRIP;MPRIP                     | 0.000420813 | 0.301793438 |
| cg10532310 | FLYWCH1;FLYWCH1                 | 0.002321262 | 0.301769341 |
| cg09179248 | PRKCZ;PRKCZ;PRKCZ               | 0.002321262 | 0.301741995 |
| cg04956382 | MYOT;MYOT;MYOT;MYOT             | 0.001038267 | 0.301724471 |
| cg15072619 | SLC39A12;SLC39A12               | 0.005790932 | 0.301683049 |
| cg02359160 | C1orf228                        | 0.007567702 | 0.301640304 |
| cg13643509 | RPTOR;RPTOR                     | 0.000420813 | 0.301624076 |
| cg04369306 |                                 | 0.001038267 | 0.301585253 |
| cg24300845 |                                 | 0.002321262 | 0.30157167  |
| cg20476058 | LIMS2                           | 0.000420813 | 0.301553835 |
| cg06244417 | FCN1                            | 0.002321262 | 0.301538795 |
| cg13665021 |                                 | 0.000420813 | 0.301530662 |

|            |                                         |             |             |
|------------|-----------------------------------------|-------------|-------------|
| cg21816393 |                                         | 0.000420813 | 0.301524419 |
| cg11249762 | SEPT9;SEPT9;SEPT9;SEPT9;SEPT9           | 0.001569481 | 0.301521539 |
| cg00736984 | PLEC1;PLEC1;PLEC1                       | 0.001569481 | 0.301518146 |
| cg09427016 | ACSF3;ACSF3;ACSF3                       | 0.003185744 | 0.301493341 |
| cg01043583 | MSRA;MSRA;MSRA                          | 0.000420813 | 0.301486311 |
| cg12093241 | ARID1B;ARID1B;ARID1B                    | 0.003185744 | 0.301446088 |
| cg16344173 | MAD1L1;MAD1L1;MAD1L1                    | 0.000420813 | 0.301444867 |
| cg26891210 | CTSS                                    | 0.003185744 | 0.30140266  |
| cg22431093 | FGD4                                    | 0.000420813 | 0.301393259 |
| cg09234973 | PAX8;PAX8;PAX8;PAX8;LOC440839;PAX8      | 0.000420813 | 0.301388723 |
| cg11010552 | ACSL6;ACSL6                             | 0.001569481 | 0.301383222 |
| cg03656863 |                                         | 0.003185744 | 0.301349818 |
| cg06450952 | C8orf56                                 | 0.000420813 | 0.301339066 |
| cg14835981 | PRKAR1B;PRKAR1B;PRKAR1B;PRKAR1B;PRKAR1B | 0.004405484 | 0.301311983 |
| cg05570654 | HDAC4                                   | 0.000420813 | 0.301234398 |
| cg14801864 | BFSP1                                   | 0.003185744 | 0.301219184 |
| cg23898497 | PVT1                                    | 0.003185744 | 0.301219034 |
| cg00450651 |                                         | 0.002321262 | 0.301170512 |
| cg02895948 | PLXNA2                                  | 0.001569481 | 0.301168521 |
| cg02217184 | GPR18;GPR18;UBAC2;UBAC2;UBAC2           | 0.00961166  | 0.301160797 |
| cg14470121 | IFT140;TMEM204                          | 0.003185744 | 0.301136785 |
| cg07750741 | CYFIP2;CYFIP2                           | 0.000420813 | 0.301094784 |
| cg00081919 |                                         | 0.000420813 | 0.301086444 |
| cg26188726 | TRIM72                                  | 0.000420813 | 0.301048271 |
| cg09435170 |                                         | 0.00961166  | 0.301048001 |
| cg07617814 | ZNF217                                  | 0.000420813 | 0.301030361 |
| cg16946840 | MED12L                                  | 0.003185744 | 0.301003609 |
| cg07298299 | GYLTL1B;GYLTL1B                         | 0.000420813 | 0.300994606 |
| cg01164574 |                                         | 0.001569481 | 0.300986661 |
| cg26307814 | PIK3CD                                  | 0.004405484 | 0.300960241 |
| cg02550151 | BRD1;BRD1                               | 0.002321262 | 0.300929891 |
| cg16469740 | HDAC9;HDAC9                             | 0.001038267 | 0.300918628 |
| cg21741708 |                                         | 0.007567702 | 0.300892643 |
| cg04815334 | NADSYN1                                 | 0.005790932 | 0.30089037  |
| cg20847701 | PVT1                                    | 0.002321262 | 0.300875824 |
| cg18402166 | LOC146880;LOC146880                     | 0.005790932 | 0.300853678 |
| cg00288844 | TXNDC11                                 | 0.000420813 | 0.300811026 |
| cg06033531 | FAM193B;FAM193B                         | 0.005790932 | 0.300805383 |
| cg10254970 |                                         | 0.000420813 | 0.300786398 |
| cg17830682 | LGR6;LGR6;LGR6                          | 0.003185744 | 0.300780754 |
| cg11071202 |                                         | 0.003185744 | 0.300777752 |
| cg02059268 |                                         | 0.007567702 | 0.300747498 |
| cg24544082 | SPTBN1                                  | 0.002321262 | 0.300718454 |
| cg09186101 | SLC16A3;SLC16A3;SLC16A3                 | 0.002321262 | 0.300667299 |
| cg27037305 | BRF1;BRF1                               | 0.001173833 | 0.300656179 |
| cg12104022 | FERMT2;FERMT2;FERMT2                    | 0.000420813 | 0.300649061 |
| cg26140802 |                                         | 0.003185744 | 0.300638578 |
| cg16589830 |                                         | 0.000420813 | 0.300611759 |
| cg00658405 | ADAMTSL5                                | 0.001569481 | 0.300560294 |
| cg09202659 | JARID2                                  | 0.000420813 | 0.300491943 |
| cg16346422 | SLC22A18;SLC22A18AS                     | 0.000420813 | 0.300443213 |
| cg07466788 | SLC16A3;SLC16A3;SLC16A3                 | 0.000420813 | 0.300439813 |
| cg09506001 | ADPRHL2                                 | 0.000636165 | 0.300409664 |
| cg13175282 | COMT;COMT;COMT;COMT                     | 0.000420813 | 0.300279241 |
| cg03822873 | AHCYL2;AHCYL2                           | 0.00961166  | 0.300277837 |
| cg07570113 | LOC644649                               | 0.005790932 | 0.300247912 |
| cg05426662 |                                         | 0.000420813 | 0.300245135 |
| cg14511156 | OSCAR;OSCAR;OSCAR;OSCAR;OSCAR;OSCAR;    | 0.000420813 | 0.30023874  |
| cg03690812 | SH2B3                                   | 0.001569481 | 0.300209541 |

|            |                                       |             |              |
|------------|---------------------------------------|-------------|--------------|
| cg26917640 |                                       | 0.007567702 | 0.300162933  |
| cg22143766 | WNT5A                                 | 0.001173833 | 0.300159983  |
| cg22005565 | SLFNL1;SLFNL1                         | 0.000636165 | 0.300148809  |
| cg17112266 | ABCB8                                 | 0.000420813 | 0.300144367  |
| cg07701837 | MAP2;MAP2;MAP2;MAP2                   | 0.002321262 | 0.300138061  |
| cg16392860 |                                       | 0.002321262 | 0.300124849  |
| cg27416489 | KIF5C                                 | 0.000420813 | 0.300106751  |
| cg13488011 |                                       | 0.004405484 | 0.300081412  |
| cg21805118 | DIABLO;DIABLO;DIABLO;DIABLO           | 0.000420813 | 0.300053679  |
| cg07270021 |                                       | 0.000420813 | 0.300001889  |
| cg07119830 | TRIM8                                 | 0.00961166  | -0.300041469 |
| cg26597982 | TSNARE1                               | 0.000420813 | -0.300105054 |
| cg02774855 | CLIP4                                 | 0.000420813 | -0.300122644 |
| cg27118761 | KCNC1;KCNC1                           | 0.007567702 | -0.300288158 |
| cg00113020 | LILRB4;LILRB4                         | 0.004405484 | -0.300694566 |
| cg13257636 | CLIP4                                 | 0.000420813 | -0.300901868 |
| cg07512814 | LDLR                                  | 0.007567702 | -0.300935958 |
| cg13416213 |                                       | 0.005790932 | -0.30110643  |
| cg20804700 | MCOLN2                                | 0.003185744 | -0.301626903 |
| cg09294077 | GPHN;GPHN                             | 0.005790932 | -0.301713067 |
| cg00409309 | HLA-DOB                               | 0.007567702 | -0.30189799  |
| cg11206634 | SFT2D3                                | 0.002321262 | -0.302343374 |
| cg03405515 | MAP9                                  | 0.002321262 | -0.302426111 |
| cg13356117 | TTC12                                 | 0.004405484 | -0.30314003  |
| cg25333258 | CAMK2B;CAMK2B;CAMK2B;CAMK2B;CAMK2B;CA | 0.002321262 | -0.303228449 |
| cg22513924 | NMNAT2                                | 0.005790932 | -0.303994746 |
| cg16296829 | KCNN3;KCNN3                           | 0.002321262 | -0.304040121 |
| cg15861196 |                                       | 0.003185744 | -0.304389209 |
| cg02935904 | TTC22;TTC22                           | 0.001038267 | -0.304422521 |
| cg06237487 | SLC6A16                               | 0.002321262 | -0.304693428 |
| cg00073780 | PKIB;PKIB;PKIB;PKIB;PKIB              | 0.001038267 | -0.304826914 |
| cg20598560 | SGPP2                                 | 0.002321262 | -0.304956257 |
| cg13136933 | LOC283663                             | 0.00961166  | -0.305210995 |
| cg17285225 | OXTR;OXTR                             | 0.007567702 | -0.305602547 |
| cg19882132 |                                       | 0.000420813 | -0.305691195 |
| cg02539402 |                                       | 0.000420813 | -0.305697413 |
| cg10137084 | CACNA2D3                              | 0.007567702 | -0.30634587  |
| cg06161738 | GALNT11                               | 0.007567702 | -0.306510436 |
| cg23840223 | NMU                                   | 0.001569481 | -0.306688887 |
| cg02466321 | ANKRD34B;ANKRD34B                     | 0.001569481 | -0.306898822 |
| cg12306156 | THRB;THRB;THRB                        | 0.000420813 | -0.306904939 |
| cg07563944 | CBFA2T3                               | 0.000636165 | -0.306906604 |
| cg14583606 | SLC1A1                                | 0.002629558 | -0.306915336 |
| cg00682125 | CDKAL1                                | 0.000420813 | -0.307099609 |
| cg16086373 | TMEM200C                              | 0.005790932 | -0.307356211 |
| cg11017382 | MAST4;MAST4                           | 0.007567702 | -0.307442448 |
| cg12277366 | TCEA1;TCEA1                           | 0.001569481 | -0.308013009 |
| cg02896872 | ITPKB                                 | 0.007567702 | -0.308106129 |
| cg05048199 | FBXL2;FBXL2                           | 0.00961166  | -0.308492112 |
| cg18240143 | C14orf39                              | 0.001569481 | -0.308497122 |
| cg05206657 |                                       | 0.003185744 | -0.309707661 |
| cg17157198 | IKZF1                                 | 0.007567702 | -0.310041947 |
| cg19529326 | EPB41L4A;FLJ11235;EPB41L4A            | 0.000466745 | -0.310265272 |
| cg10911619 | TBC1D12                               | 0.000420813 | -0.310375059 |
| cg06313119 | FGF14                                 | 0.001569481 | -0.310695676 |
| cg26381364 | C12orf42;C12orf42                     | 0.007567702 | -0.310725183 |
| cg06562372 | ABCB1                                 | 0.000420813 | -0.310961091 |
| cg26364899 | PPARG;PPARG;PPARG                     | 0.000636165 | -0.311031774 |
| cg19873491 | FAM149A                               | 0.002321262 | -0.311105285 |

|            |                                        |             |              |
|------------|----------------------------------------|-------------|--------------|
| cg15958828 | FOXP1;FOXP1                            | 0.000420813 | -0.311190406 |
| cg15410236 | ARID3A                                 | 0.000420813 | -0.312274579 |
| cg25068347 | ETS1;ETS1;ETS1                         | 0.003185744 | -0.312432524 |
| cg12112870 | E2F5;E2F5;E2F5                         | 0.000636165 | -0.31250092  |
| cg17052813 | GPR37                                  | 0.000636165 | -0.31256259  |
| cg15378605 | CHST15                                 | 0.004405484 | -0.312564207 |
| cg10353539 | TTC12                                  | 0.004405484 | -0.312597094 |
| cg21062931 | DHCR24                                 | 0.002321262 | -0.312753896 |
| cg22520644 | WDR17;WDR17                            | 0.001569481 | -0.313080349 |
| cg16289355 | FAM149A                                | 0.002321262 | -0.313088982 |
| cg03710481 | PKIB;PKIB;PKIB;PKIB;PKIB               | 0.001569481 | -0.313090049 |
| cg03339817 | SFT2D3                                 | 0.000420813 | -0.31313059  |
| cg06945523 | SFTA3                                  | 0.000420813 | -0.313239051 |
| cg14169158 | FAM78B                                 | 0.002321262 | -0.313274241 |
| cg11021317 |                                        | 0.000420813 | -0.313661368 |
| cg11012046 | GLB1L2                                 | 0.00657282  | -0.313739409 |
| cg08163918 | SHMT2;SHMT2;SHMT2;SHMT2;SHMT2;SHMT2;SH | 0.007567702 | -0.31449094  |
| cg03328673 |                                        | 0.007567702 | -0.314797659 |
| cg06335343 | TMEM20;TMEM20                          | 0.00961166  | -0.315074556 |
| cg22152931 | PRKRIP1                                | 0.001569481 | -0.315087155 |
| cg24631970 | XKR6                                   | 0.000420813 | -0.31521985  |
| cg02048922 | BAI1                                   | 0.003185744 | -0.315325613 |
| cg17037963 |                                        | 0.000420813 | -0.315362029 |
| cg22685009 | MRPS27                                 | 0.000420813 | -0.315394118 |
| cg11777523 | GPR148                                 | 0.007567702 | -0.315456226 |
| cg18175036 | MAST4;MAST4                            | 0.002024793 | -0.315993671 |
| cg12816198 | IRF5;IRF5;IRF5;IRF5;IRF5;IRF5          | 0.003185744 | -0.316215456 |
| cg19631815 | DTX1                                   | 0.000636165 | -0.316251784 |
| cg09197279 |                                        | 0.005790932 | -0.316282203 |
| cg11156873 | LPCAT1                                 | 0.000420813 | -0.316357143 |
| cg12387700 | MCOLN3;MCOLN3                          | 0.002321262 | -0.316369692 |
| cg17774764 | SPIB                                   | 0.005790932 | -0.316551204 |
| cg05488043 | P2RY1;P2RY1                            | 0.001569481 | -0.316663068 |
| cg01604404 |                                        | 0.001569481 | -0.316829825 |
| cg23231729 | THEM4                                  | 0.00961166  | -0.316872754 |
| cg21197594 | EHMT1;FLJ40292;EHMT1                   | 0.000420813 | -0.3173363   |
| cg02007288 | GTF2E2                                 | 0.000420813 | -0.317667641 |
| cg15944060 |                                        | 0.004405484 | -0.318556706 |
| cg00418880 | HS6ST3                                 | 0.001569481 | -0.318744207 |
| cg02668248 | KLF2                                   | 0.007567702 | -0.318756154 |
| cg00893424 | SACS                                   | 0.007567702 | -0.319304223 |
| cg00631837 | PHF21B;PHF21B                          | 0.007567702 | -0.319353239 |
| cg02452966 | RYR1;RYR1                              | 0.00961166  | -0.319396301 |
| cg12748332 | MPPED2                                 | 0.002321262 | -0.319471564 |
| cg11769456 | SNED1                                  | 0.007567702 | -0.319488692 |
| cg12243375 | GUCY1A2                                | 0.002321262 | -0.319917111 |
| cg06547386 | MPPED2                                 | 0.005790932 | -0.320104865 |
| cg13378394 | KCNC3                                  | 0.000636165 | -0.320434758 |
| cg24789487 | FAM171B;FAM171B                        | 0.000420813 | -0.320528759 |
| cg04741853 |                                        | 0.007567702 | -0.320752135 |
| cg08726863 | SFT2D3                                 | 0.001038267 | -0.321598328 |
| cg08055910 | FAM149A                                | 0.004405484 | -0.32227123  |
| cg09287328 |                                        | 0.001569481 | -0.322363727 |
| cg19053239 | KIF5C                                  | 0.000420813 | -0.322381944 |
| cg10865087 | BICC1                                  | 0.000420813 | -0.322671492 |
| cg08808128 | CLIP4;CLIP4                            | 0.000636165 | -0.322757892 |
| cg05919561 | TTLL7                                  | 0.000636165 | -0.322757998 |
| cg04657224 | XKR6                                   | 0.003185744 | -0.322998424 |
| cg01823925 | ADAM19                                 | 0.002321262 | -0.323203554 |

|            |                                         |             |              |
|------------|-----------------------------------------|-------------|--------------|
| cg23249922 |                                         | 0.001038267 | -0.323341631 |
| cg05022673 | DST;BEND6                               | 0.001777515 | -0.323627337 |
| cg16296017 |                                         | 0.000420813 | -0.323989214 |
| cg01646461 | CCR6;CCR6                               | 0.00961166  | -0.323999801 |
| cg27207756 |                                         | 0.003185744 | -0.324205457 |
| cg05549575 | C17orf87                                | 0.000420813 | -0.324338272 |
| cg15138339 | COASY;COASY;COASY;COASY;COASY           | 0.000420813 | -0.325175988 |
| cg03521656 | TMC5;TMC5;TMC5;TMC5                     | 0.002321262 | -0.325652546 |
| cg27375072 | SMPDL3A                                 | 0.001569481 | -0.325920849 |
| cg04748988 | PPARG;PPARG;PPARG                       | 0.007567702 | -0.326044394 |
| cg26685735 | COL4A3;COL4A4;COL4A3;COL4A4;COL4A3;COL4 | 0.001038267 | -0.326359264 |
| cg04757345 | C4orf29                                 | 0.000420813 | -0.326379586 |
| cg12258785 | THRB;THRB;THRB                          | 0.002321262 | -0.326575564 |
| cg15931721 | C1QL2                                   | 0.003613402 | -0.327052435 |
| cg15446670 | ABC1;RUNDC3B;RUNDC3B;RUNDC3B            | 0.00961166  | -0.327287259 |
| cg08551725 | SCRN1;SCRN1;SCRN1;SCRN1                 | 0.000420813 | -0.327461979 |
| cg00677986 | PAWR                                    | 0.000420813 | -0.327516999 |
| cg10880973 | ZDHHC14;ZDHHC14                         | 0.000420813 | -0.327692167 |
| cg08232264 | FAM164A                                 | 0.000420813 | -0.328027653 |
| cg16142306 | UCHL1;UCHL1                             | 0.000420813 | -0.328039474 |
| cg09277575 | AKR1D1                                  | 0.001569481 | -0.32808963  |
| cg18166862 | FAM78B                                  | 0.001038267 | -0.32844028  |
| cg25375340 | MCOLN2                                  | 0.000420813 | -0.329031483 |
| cg04324308 | COL4A3;COL4A4;COL4A3;COL4A4;COL4A3;COL4 | 0.005790932 | -0.329151686 |
| cg14375890 |                                         | 0.004405484 | -0.329505361 |
| cg15847198 | GUCY1A2                                 | 0.000420813 | -0.329621579 |
| cg03730703 | PEA15                                   | 0.007567702 | -0.32963333  |
| cg23934477 | TCOF1;TCOF1;TCOF1;TCOF1;TCOF1;TCOF1     | 0.002321262 | -0.329665824 |
| cg18817459 | SOBP                                    | 0.000420813 | -0.330023651 |
| cg19954286 | CCR6;CCR6                               | 0.00961166  | -0.330458804 |
| cg13603533 |                                         | 0.00961166  | -0.330627811 |
| cg27275352 | CILP2                                   | 0.003185744 | -0.33084501  |
| cg00323305 | THRB;THRB;THRB                          | 0.002321262 | -0.330920878 |
| cg16419066 | MGC2889;HRASLS                          | 0.001173833 | -0.331008911 |
| cg05302420 | ENTPD7                                  | 0.000636165 | -0.331133188 |
| cg00393585 | C4orf39;TRIM61                          | 0.005790932 | -0.331614588 |
| cg09601770 | DPP4;DPP4                               | 0.007567702 | -0.33170705  |
| cg13702005 | C12orf42;C12orf42                       | 0.002321262 | -0.331859557 |
| cg05253577 | WWC1;WWC1;WWC1                          | 0.00961166  | -0.331940127 |
| cg04442576 | SLC35F1                                 | 0.003185744 | -0.331941856 |
| cg02445447 | FHL2;FHL2;FHL2;FHL2;FHL2;FHL2           | 0.000420813 | -0.332507484 |
| cg19039464 | C4orf31;C4orf31                         | 0.001038267 | -0.332663927 |
| cg17838026 | KCNC3                                   | 0.001038267 | -0.333183218 |
| cg11881599 | CLLU1OS;CLLU1;CLLU1                     | 0.000420813 | -0.333467332 |
| cg09915835 | UGT8                                    | 0.001038267 | -0.333475178 |
| cg04168675 | DOCK10                                  | 0.001173833 | -0.333875986 |
| cg10739095 | CLSTN2                                  | 0.001569481 | -0.334213824 |
| cg10248492 |                                         | 0.001569481 | -0.334277709 |
| cg16787199 | BCL2L10                                 | 0.002321262 | -0.334386556 |
| cg25033076 | MPPE1                                   | 0.002321262 | -0.334587847 |
| cg21774136 | RERE;RERE                               | 0.003185744 | -0.334649428 |
| cg27236875 | ERBB4;ERBB4                             | 0.003185744 | -0.334705984 |
| cg16235962 | CXCR5                                   | 0.000420813 | -0.335197003 |
| cg21303011 | THRB;THRB;THRB                          | 0.000636165 | -0.335242957 |
| cg12212657 | LRRN1                                   | 0.000420813 | -0.335651732 |
| cg00674706 |                                         | 0.001569481 | -0.335668385 |
| cg19224713 | SAMD12;SAMD12                           | 0.000636165 | -0.336073837 |
| cg19396666 |                                         | 0.007567702 | -0.336489006 |
| cg15939347 | TSNARE1                                 | 0.004405484 | -0.337289518 |

|            |                                      |             |              |
|------------|--------------------------------------|-------------|--------------|
| cg21902325 | LHFPL2                               | 0.005790932 | -0.337473123 |
| cg00950381 | QRICH2                               | 0.000420813 | -0.337655122 |
| cg15129663 | FMO1                                 | 0.001038267 | -0.337896914 |
| cg19753526 | FHL2;FHL2;FHL2;FHL2;FHL2;FHL2        | 0.003185744 | -0.339308935 |
| cg27205687 | GUCY1A2;GUCY1A2                      | 0.004405484 | -0.339423234 |
| cg00342532 | KCNC3;KCNC3                          | 0.004997918 | -0.339454525 |
| cg24974423 | HS6ST3                               | 0.000636165 | -0.339584127 |
| cg01510903 | KRT18;KRT18                          | 0.004405484 | -0.339624655 |
| cg01300410 | TMEM20;TMEM20                        | 0.004405484 | -0.339812743 |
| cg06477663 | LCP1                                 | 0.002321262 | -0.340098159 |
| cg22982654 |                                      | 0.00961166  | -0.34056374  |
| cg17958423 | ZNF215                               | 0.002321262 | -0.341363022 |
| cg21868774 | FAM78B                               | 0.001569481 | -0.341492018 |
| cg24458474 | GRID1                                | 0.001038267 | -0.341515938 |
| cg08951903 | ZNF239;ZNF239;ZNF239                 | 0.004405484 | -0.341777012 |
| cg20043258 | CDC42BPB                             | 0.001173833 | -0.342173121 |
| cg16031136 | LYN;LYN                              | 0.000420813 | -0.342180283 |
| cg18533282 | SPATA18;SPATA18                      | 0.005790932 | -0.342371607 |
| cg27448015 | SMPDL3A                              | 0.001569481 | -0.34250588  |
| cg16735130 |                                      | 0.004405484 | -0.342552282 |
| cg25912827 | DPP4;DPP4                            | 0.007567702 | -0.343899668 |
| cg13205384 | ANO5;ANO5                            | 0.001038267 | -0.343972352 |
| cg06177053 | DTD1;DTD1                            | 0.004405484 | -0.344336236 |
| cg14412134 | MTHFD1                               | 0.00961166  | -0.345335062 |
| cg13626582 | LOC283663                            | 0.008581131 | -0.345529085 |
| cg12260653 | TMEM20;TMEM20                        | 0.003613402 | -0.346166039 |
| cg16703576 | RUNDC3B;RUNDC3B;RUNDC3B;ABCB1;RUNDC3 | 0.005790932 | -0.346197877 |
| cg13919148 | INADL;INADL                          | 0.005790932 | -0.346308296 |
| cg08961187 | MDGA1                                | 0.005790932 | -0.346378193 |
| cg19908577 | UGT8                                 | 0.001569481 | -0.346568787 |
| cg12693702 | MIR148A                              | 0.002321262 | -0.346893689 |
| cg17229371 | LPCAT1                               | 0.002321262 | -0.347102727 |
| cg13429095 |                                      | 0.007567702 | -0.347155128 |
| cg16643706 | C5orf13;C5orf13                      | 0.002321262 | -0.347162814 |
| cg22117805 | PRR5L;PRR5L;PRR5L;PRR5L              | 0.003185744 | -0.347220477 |
| cg27510257 | CARS2                                | 0.000420813 | -0.347381401 |
| cg08622098 | SIPA1L3                              | 0.000420813 | -0.348000039 |
| cg26789732 | KCNB2                                | 0.000420813 | -0.348230249 |
| cg21383151 | TBC1D12                              | 0.005790932 | -0.348653953 |
| cg24843474 | RGS7                                 | 0.007567702 | -0.349319094 |
| cg07508229 | TBC1D12;TBC1D12                      | 0.000420813 | -0.34963756  |
| cg14851108 | GRID1                                | 0.000420813 | -0.349660543 |
| cg23604012 | SGPP2                                | 0.002321262 | -0.349673941 |
| cg24593832 |                                      | 0.000420813 | -0.349941883 |
| cg20755651 | SMOC2;SMOC2                          | 0.007567702 | -0.350444775 |
| cg23255835 | CLIP4                                | 0.002321262 | -0.351113651 |
| cg08343042 | TMEM163                              | 0.001569481 | -0.35120628  |
| cg07301433 | CYP1B1                               | 0.003185744 | -0.351824422 |
| cg16429499 | NLRC3                                | 0.000420813 | -0.351949128 |
| cg00900735 | GRB2;GRB2                            | 0.000466745 | -0.352166136 |
| cg22750001 | MPEG1                                | 0.000420813 | -0.352533383 |
| cg14508705 | DNM3;DNM3                            | 0.001569481 | -0.352598081 |
| cg12145080 | SGPP2                                | 0.007567702 | -0.35259936  |
| cg23889440 | MAPK4                                | 0.000636165 | -0.352753921 |
| cg19544662 | FOXI3                                | 0.00961166  | -0.352904921 |
| cg05290695 | SAMD12;SAMD12                        | 0.003613402 | -0.352991501 |
| cg04922681 | TNFSF11;TNFSF11                      | 0.003185744 | -0.354634763 |
| cg17134153 | FCRL3                                | 0.000420813 | -0.355247972 |
| cg17607231 | SP140;SP140                          | 0.000420813 | -0.355267469 |

|            |                                           |             |              |
|------------|-------------------------------------------|-------------|--------------|
| cg27236007 | RASGRP3;RASGRP3;RASGRP3                   | 0.000420813 | -0.355325527 |
| cg16523158 | CCR6;CCR6                                 | 0.000420813 | -0.355414491 |
| cg07052390 | IGSF9B                                    | 0.001569481 | -0.355655336 |
| cg15461105 |                                           | 0.004997918 | -0.356712713 |
| cg09132102 |                                           | 0.001038267 | -0.35749011  |
| cg05478631 | T                                         | 0.000420813 | -0.357612753 |
| cg08844849 | SIGLEC10;SIGLEC10;SIGLEC10;SIGLEC10;SIGLE | 0.000420813 | -0.357640142 |
| cg16272981 | LPCAT1                                    | 0.000420813 | -0.357775173 |
| cg08229018 | PRSS12                                    | 0.000420813 | -0.359466289 |
| cg15418826 | KIF21A                                    | 0.003185744 | -0.359528156 |
| cg23679819 | RNMT                                      | 0.000636165 | -0.359606829 |
| cg11430157 | SLC35F1;SLC35F1                           | 0.002321262 | -0.359682607 |
| cg16148346 |                                           | 0.002321262 | -0.360743997 |
| cg17187287 | UGT8                                      | 0.004997918 | -0.361446161 |
| cg03562952 | LPCAT1                                    | 0.000636165 | -0.361709102 |
| cg10512951 | LMBRD1                                    | 0.007567702 | -0.362021268 |
| cg10507275 | LRRN1;LRRN1                               | 0.004405484 | -0.362471815 |
| cg25834419 | GOLSYN;GOLSYN;GOLSYN;GOLSYN;GOLSYN;G      | 0.000420813 | -0.362686635 |
| cg00254017 | MAP3K1                                    | 0.007567702 | -0.362765748 |
| cg00688963 | THRB;THRB;THRB;THRB;THRB;THRB             | 0.001038267 | -0.36301485  |
| cg20966357 | C6orf10                                   | 0.000420813 | -0.363174941 |
| cg14255337 | KDM2B;KDM2B                               | 0.000420813 | -0.363295403 |
| cg25208863 | GOLSYN;GOLSYN;GOLSYN;GOLSYN;GOLSYN;G      | 0.001038267 | -0.364003936 |
| cg13560871 | C1orf115                                  | 0.005790932 | -0.364253771 |
| cg15301489 | XKR6                                      | 0.000420813 | -0.365119713 |
| cg02132714 | HOXB4                                     | 0.007567702 | -0.366224205 |
| cg16931707 | PRICKLE1;PRICKLE1;PRICKLE1;PRICKLE1       | 0.000420813 | -0.36688159  |
| cg01529149 | FAM83H                                    | 0.003185744 | -0.367019894 |
| cg17881660 | SLC22A15;SLC22A15                         | 0.000420813 | -0.36755881  |
| cg23428985 | CLIP4                                     | 0.000636165 | -0.367842457 |
| cg20518096 | AKR1D1                                    | 0.001569481 | -0.367888048 |
| cg21524538 | SDCBP2                                    | 0.002321262 | -0.368757847 |
| cg05068452 | UGT8                                      | 0.001569481 | -0.369353466 |
| cg07441944 | CD82;CD82                                 | 0.000420813 | -0.369479212 |
| cg23045258 | COL4A3;COL4A4;COL4A3;COL4A4;COL4A3;COL4   | 0.001569481 | -0.369929646 |
| cg02386311 | RUNDC2A                                   | 0.000420813 | -0.370453205 |
| cg12976883 | SP140;SP140                               | 0.000420813 | -0.371459576 |
| cg26164712 | CXCR5;CXCR5                               | 0.000636165 | -0.372435697 |
| cg27486637 | WDR17;WDR17;WDR17;WDR17                   | 0.000420813 | -0.372588656 |
| cg02087075 | SLC35B2;NFKBIE                            | 0.000420813 | -0.373170943 |
| cg20849025 | MPEG1                                     | 0.000420813 | -0.373223392 |
| cg03769371 | LCA5;LCA5                                 | 0.007567702 | -0.373416745 |
| cg07069934 | ISG20                                     | 0.003185744 | -0.373835805 |
| cg08352439 | VOPP1                                     | 0.002321262 | -0.374539784 |
| cg02266771 | PRSS16                                    | 0.004405484 | -0.375969307 |
| cg00380172 | SASH1                                     | 0.003185744 | -0.376060747 |
| cg14409559 | MSC                                       | 0.00961166  | -0.376357959 |
| cg15120525 | LPP;LPP;LPP                               | 0.002321262 | -0.376442654 |
| cg26146027 | THRB;THRB;THRB                            | 0.002321262 | -0.376977568 |
| cg17319142 | C1QL2                                     | 0.003185744 | -0.37909331  |
| cg07018090 | BANP;BANP                                 | 0.007567702 | -0.379175171 |
| cg22515937 | FCRL1;FCRL1;FCRL1                         | 0.000420813 | -0.379279648 |
| cg23514324 | PPARG;PPARG;PPARG                         | 0.001038267 | -0.380414619 |
| cg27487839 | XKR6                                      | 0.001569481 | -0.380774875 |
| cg01035689 |                                           | 0.007567702 | -0.381553852 |
| cg26217402 | C14orf43                                  | 0.000420813 | -0.383584435 |
| cg23234832 | THRB;THRB;THRB                            | 0.000420813 | -0.385844347 |
| cg26404422 | ETS1;ETS1;ETS1                            | 0.000420813 | -0.386365979 |
| cg04787728 | NLRC3                                     | 0.000420813 | -0.388197842 |

|            |                                          |             |              |
|------------|------------------------------------------|-------------|--------------|
| cg06963205 | RIMS1;RIMS1;RIMS1;RIMS1;RIMS1;RIMS1      | 0.007567702 | -0.38821076  |
| cg20280350 | MCOLN3                                   | 0.005790932 | -0.388614346 |
| cg08482682 | RAB39                                    | 0.000420813 | -0.389007916 |
| cg19846040 | EML6                                     | 0.000636165 | -0.38927034  |
| cg10605766 | IQCB1;IQCB1                              | 0.000420813 | -0.390042366 |
| cg03860038 |                                          | 0.005790932 | -0.390421331 |
| cg03147210 | THEM4                                    | 0.00961166  | -0.390451772 |
| cg26828909 | SAMD12;SAMD12;SAMD12;SAMD12              | 0.003185744 | -0.391440184 |
| cg02892755 | STX12                                    | 0.000420813 | -0.391643872 |
| cg22697239 | CD82;CD82                                | 0.002321262 | -0.392241529 |
| cg00865356 | FAM190A                                  | 0.005790932 | -0.392348738 |
| cg23683962 |                                          | 0.001569481 | -0.392386646 |
| cg04928005 | THRB;THRB;THRB                           | 0.007567702 | -0.392880756 |
| cg26703511 |                                          | 0.005790932 | -0.393215507 |
| cg00107970 |                                          | 0.000636165 | -0.393473884 |
| cg17694130 |                                          | 0.001038267 | -0.393792778 |
| cg11650874 | CHID1;CHID1;CHID1;CHID1;CHID1            | 0.000420813 | -0.394418086 |
| cg25138484 | ALPP                                     | 0.007567702 | -0.395143106 |
| cg23202468 | ZBTB47                                   | 0.007567702 | -0.39614216  |
| cg16851385 |                                          | 0.000420813 | -0.396377027 |
| cg14622549 | EP400                                    | 0.000420813 | -0.39926399  |
| cg19861842 | RHOBTB2;RHOBTB2;RHOBTB2                  | 0.000420813 | -0.399731746 |
| cg00362381 | RAB40C                                   | 0.000420813 | -0.399862391 |
| cg00464927 | LRP5                                     | 0.000420813 | -0.400382954 |
| cg01199327 | CD82;CD82                                | 0.007567702 | -0.400845609 |
| cg14733637 | CLPTM1L                                  | 0.001836098 | -0.401110775 |
| cg08045301 | ATXN1L;ATXN1L                            | 0.001038267 | -0.401549265 |
| cg17588003 | C17orf87                                 | 0.000420813 | -0.401802761 |
| cg16280667 | CXCR5;CXCR5                              | 0.000420813 | -0.401884044 |
| cg11821440 | TBC1D12                                  | 0.007567702 | -0.405271412 |
| cg19672873 | FAM177B                                  | 0.000420813 | -0.40555274  |
| cg21097090 | TNFAIP8;TNFAIP8                          | 0.000420813 | -0.406863295 |
| cg19602479 | FCRL3                                    | 0.000420813 | -0.408424421 |
| cg16376000 | FGF12;FGF12                              | 0.005790932 | -0.408505149 |
| cg18345806 | NMU                                      | 0.005790932 | -0.409565503 |
| cg14940871 |                                          | 0.000420813 | -0.411097876 |
| cg27602263 | RAX                                      | 0.000420813 | -0.411554936 |
| cg00770471 | C4orf34                                  | 0.000420813 | -0.412670948 |
| cg09734791 | MSC                                      | 0.000636165 | -0.413176052 |
| cg21467365 |                                          | 0.000420813 | -0.413306734 |
| cg05094429 | CCR6;CCR6                                | 0.007567702 | -0.414273871 |
| cg24074594 | FCRLA                                    | 0.000420813 | -0.415057476 |
| cg04576021 | HLA-DOB                                  | 0.000420813 | -0.415355728 |
| cg18418928 | MDS2                                     | 0.002321262 | -0.415979757 |
| cg24188017 | SLC6A16                                  | 0.000420813 | -0.416292334 |
| cg01192487 | SAMD12;SAMD12;SAMD12;SAMD12              | 0.002321262 | -0.417182688 |
| cg00303548 | HS6ST3                                   | 0.007567702 | -0.419293959 |
| cg21794222 | CCR6;CCR6                                | 0.007567702 | -0.422560193 |
| cg10067737 |                                          | 0.000420813 | -0.422574325 |
| cg06996599 | C6orf136;C6orf136;C6orf136               | 0.000420813 | -0.422971884 |
| cg25087423 | CXCR5                                    | 0.000420813 | -0.429204927 |
| cg26399903 |                                          | 0.000636165 | -0.429448636 |
| cg04950342 |                                          | 0.000420813 | -0.429507628 |
| cg01218206 | SIK3                                     | 0.000420813 | -0.430023023 |
| cg21585409 | WIPI2;WIPI2;WIPI2;WIPI2;WIPI2            | 0.000420813 | -0.432564441 |
| cg26121053 |                                          | 0.00961166  | -0.433858125 |
| cg22160073 | TRIM34;TRIM34;TRIM34;TRIM6-TRIM34;TRIM34 | 0.004405484 | -0.435525065 |
| cg02393640 | LUZP6;MTPN                               | 0.000420813 | -0.435857534 |
| cg24540521 | THEM4                                    | 0.000420813 | -0.435874659 |



|            |                                          |             |              |
|------------|------------------------------------------|-------------|--------------|
| cg15787744 | NFKBIE                                   | 0.000420813 | -0.437138367 |
| cg04352288 | CA5A                                     | 0.000420813 | -0.438422528 |
| cg16287740 | TNPO3                                    | 0.000420813 | -0.438826086 |
| cg24110396 | CCNY                                     | 0.000420813 | -0.441173661 |
| cg03356747 | GRID1                                    | 0.001569481 | -0.442085088 |
| cg17587997 | FYN                                      | 0.002321262 | -0.443207824 |
| cg13414750 | CACNA1D;CACNA1D;CACNA1D                  | 0.005790932 | -0.44373015  |
| cg17622855 | ZDHHC14;ZDHHC14                          | 0.000420813 | -0.444228545 |
| cg02231062 | TNFRSF13C                                | 0.000420813 | -0.444387313 |
| cg06125903 | CTSZ                                     | 0.001038267 | -0.444451491 |
| cg14066207 | RGS6                                     | 0.003185744 | -0.444642656 |
| cg26810157 | TCF12;TCF12;TCF12;TCF12;TCF12            | 0.001038267 | -0.446318134 |
| cg16266809 |                                          | 0.000420813 | -0.447884488 |
| cg07493874 | CLPTM1L                                  | 0.000420813 | -0.450715184 |
| cg04804377 | RAD51AP2                                 | 0.007567702 | -0.451142949 |
| cg13325231 | CLPTM1L                                  | 0.000420813 | -0.4564231   |
| cg13031210 | DBX2                                     | 0.001038267 | -0.457733311 |
| cg18368845 | FOXO1                                    | 0.000420813 | -0.45809867  |
| cg01396567 | MCOLN3                                   | 0.001038267 | -0.460256836 |
| cg26675876 | XKR6                                     | 0.005790932 | -0.461724225 |
| cg17976229 | TRIM34;TRIM34;TRIM34;TRIM6-TRIM34;TRIM34 | 0.001038267 | -0.462171663 |
| cg00183239 | DHTKD1                                   | 0.000420813 | -0.463447511 |
| cg00191102 |                                          | 0.000420813 | -0.464403269 |
| cg00539174 | CTSZ                                     | 0.000420813 | -0.46641547  |
| cg00043095 | SGPP2                                    | 0.000420813 | -0.472698634 |
| cg11193201 | FCRLA                                    | 0.000420813 | -0.474981732 |
| cg08684639 | WDR17;WDR17                              | 0.001038267 | -0.47980316  |
| cg08786003 | FCRL3                                    | 0.002321262 | -0.484099097 |
| cg22324981 | NFATC1;NFATC1;NFATC1;NFATC1              | 0.001569481 | -0.486922795 |
| cg10699171 |                                          | 0.000420813 | -0.487076078 |
| cg06567596 | LMTK2                                    | 0.000420813 | -0.491455324 |
| cg18563860 | CTSZ                                     | 0.000420813 | -0.493007817 |
| cg22930549 | RAD51L1;RAD51L1;RAD51L1                  | 0.000420813 | -0.494734723 |
| cg06821460 | ARF3                                     | 0.000420813 | -0.496969166 |
| cg17768768 | CARD11                                   | 0.005790932 | -0.497052516 |
| cg03140624 | LYST                                     | 0.000420813 | -0.50708563  |
| cg03969079 | ARID5B                                   | 0.000420813 | -0.507256166 |
| cg17382048 | CXCR5                                    | 0.000420813 | -0.508117549 |
| cg13584784 | C6orf136;C6orf136;C6orf136               | 0.000420813 | -0.509554382 |
| cg07575896 | ADAM19                                   | 0.000420813 | -0.517795484 |
| cg10141261 | CHST15                                   | 0.005790932 | -0.518009322 |
| cg01453814 | SLC6A16                                  | 0.000420813 | -0.532219757 |
| cg19590591 | GOLGA3                                   | 0.001569481 | -0.537253191 |
| cg23217386 | TRIM34;TRIM34;TRIM34;TRIM6-TRIM34;TRIM34 | 0.000420813 | -0.542117389 |
| cg26959945 | MACC1                                    | 0.000420813 | -0.556787147 |
| cg19942083 |                                          | 0.000420813 | -0.559861927 |
| cg11199827 |                                          | 0.000420813 | -0.560465307 |
| cg02621376 | MCOLN2                                   | 0.000420813 | -0.573738197 |
| cg26053840 | GLO1                                     | 0.000420813 | -0.583320634 |
| cg23755933 | GOLGA3                                   | 0.001038267 | -0.585540614 |
| cg00041047 | SLC6A16                                  | 0.000466745 | -0.595789196 |
| cg19849557 | C6orf136;C6orf136;C6orf136               | 0.000466745 | -0.612356675 |
| cg09390241 |                                          | 0.000420813 | -0.614280316 |
| cg24157392 | BTLA;BTLA                                | 0.002321262 | -0.619782083 |
| cg15602298 | FCRL3                                    | 0.000532358 | -0.626135479 |
| cg13738327 | LRP5                                     | 0.000420813 | -0.658526517 |

**Supplementary table 2:**

20,661 differentially methylated CpG sites comparing B-cell group ALL-1 and ALL-2.

| TargetID   | Gene name     | FDR      | $\delta$ $\beta$ -value |
|------------|---------------|----------|-------------------------|
| cg18077971 | PAX3          | 8.60E-06 | 0.709486709             |
| cg23113963 | SCNN1B        | 1.18E-05 | 0.706386408             |
| cg00901264 |               | 8.60E-06 | 0.702210629             |
| cg22848598 | ADAM32        | 8.60E-06 | 0.696020857             |
| cg03102879 | SCNN1B        | 8.60E-06 | 0.693136932             |
| cg16647921 |               | 8.60E-06 | 0.687866386             |
| cg10440578 | SYCP1         | 1.18E-05 | 0.685781917             |
| cg27260772 | TFAP2B        | 8.60E-06 | 0.680622978             |
| cg24368848 | ZSCAN1        | 8.60E-06 | 0.678535696             |
| cg14507560 | IRX4          | 8.60E-06 | 0.677878854             |
| cg26001902 | SLC5A7        | 8.60E-06 | 0.676110416             |
| cg14416371 | MIR129-2      | 8.60E-06 | 0.675962168             |
| cg03356595 |               | 8.60E-06 | 0.67446449              |
| cg25078444 | FOXC1         | 8.60E-06 | 0.674085788             |
| cg00665492 | SLITRK3       | 1.96E-05 | 0.669702734             |
| cg03024760 | GABRG3        | 1.18E-05 | 0.668927708             |
| cg26014538 | ZIC1          | 3.34E-05 | 0.668665462             |
| cg22797031 |               | 2.58E-05 | 0.666418019             |
| cg02653559 | ZIC4          | 3.21E-05 | 0.665869332             |
| cg04569082 |               | 8.60E-06 | 0.665014937             |
| cg01923218 | CCDC67        | 8.60E-06 | 0.664481699             |
| cg25566568 |               | 1.96E-05 | 0.66241709              |
| cg18924324 | PRDM13        | 7.23E-05 | 0.662169036             |
| cg03705384 | ALX1          | 1.11E-05 | 0.66196368              |
| cg26796283 | MSX2          | 1.11E-05 | 0.661882707             |
| cg17526573 | NRXN1         | 8.60E-06 | 0.661251347             |
| cg10380328 |               | 1.96E-05 | 0.661124191             |
| cg02468050 | GRID2         | 8.60E-06 | 0.660428561             |
| cg17302155 | PRDM13        | 8.60E-06 | 0.658845932             |
| cg21026830 |               | 8.60E-06 | 0.658384379             |
| cg27376136 |               | 8.60E-06 | 0.658027817             |
| cg19972558 | PRSS12;PRSS12 | 8.60E-06 | 0.656831108             |
| cg09111223 | GRID2         | 1.50E-05 | 0.656221352             |
| cg18286501 | TMEM26        | 8.60E-06 | 0.655937224             |
| cg17259183 | NKX6-2        | 8.60E-06 | 0.655605811             |
| cg18655441 | MIPOL1        | 8.60E-06 | 0.654980607             |
| cg26896155 | FAM190A       | 1.96E-05 | 0.654238365             |
| cg16150752 | MARCH11       | 8.60E-06 | 0.653335554             |
| cg13561592 | PAPPA         | 8.60E-06 | 0.652183243             |
| cg18235050 |               | 8.60E-06 | 0.651938495             |
| cg25950625 | PLCXD3        | 8.60E-06 | 0.650685659             |
| cg06463958 | T             | 8.60E-06 | 0.650458182             |
| cg21152690 | LIN7A;LIN7A   | 8.60E-06 | 0.649917886             |
| cg13620034 | MSC           | 8.60E-06 | 0.649469801             |
| cg21289015 | USH1C         | 8.60E-06 | 0.649243829             |
| cg16038120 | FOXC1         | 8.60E-06 | 0.649101898             |
| cg06546806 |               | 8.60E-06 | 0.64833414              |
| cg25900085 | MIR124-2      | 8.60E-06 | 0.646670586             |
| cg26422161 | FOXQ1         | 8.60E-06 | 0.645750747             |
| cg01431993 | NEUROD1       | 1.60E-05 | 0.645235513             |
| cg27336026 | FOXQ1         | 8.60E-06 | 0.645048974             |
| cg21219692 |               | 8.60E-06 | 0.64458906              |
| cg20386316 |               | 8.60E-06 | 0.643787683             |
| cg08684639 | WDR17         | 1.96E-05 | 0.643211383             |
| cg13031210 | DBX2          | 8.60E-06 | 0.642780805             |

|            |                   |             |             |
|------------|-------------------|-------------|-------------|
| cg24980653 |                   | 1.50E-05    | 0.641836388 |
| cg01791874 | MARCH11           | 8.60E-06    | 0.641553629 |
| cg20365074 | GULP1             | 1.11E-05    | 0.641452509 |
| cg24843380 | ZNF454            | 8.60E-06    | 0.640232109 |
| cg25996119 | NKX2-1            | 8.60E-06    | 0.640161734 |
| cg27363829 | SLITRK3           | 1.50E-05    | 0.639213104 |
| cg08569799 |                   | 8.60E-06    | 0.639143296 |
| cg10454246 |                   | 1.11E-05    | 0.638721813 |
| cg08070771 | ZIC4;ZIC1         | 2.08E-05    | 0.638521905 |
| cg14425863 | USH1C;USH1C       | 8.60E-06    | 0.63841919  |
| cg07790615 | RYR2              | 1.50E-05    | 0.638357431 |
| cg12296772 | MTMR7             | 8.60E-06    | 0.638208422 |
| cg00043095 | SGPP2             | 1.50E-05    | 0.637947388 |
| cg19809499 | FOXE3             | 8.60E-06    | 0.637512367 |
| cg20647610 | WDR69             | 8.60E-06    | 0.63682723  |
| cg02864844 |                   | 1.18E-05    | 0.635552697 |
| cg06500337 |                   | 8.60E-06    | 0.635390651 |
| cg01414185 | HOXD4             | 1.50E-05    | 0.633484722 |
| cg05864326 | HOXD3             | 8.60E-06    | 0.633197659 |
| cg08231348 | HOOK1             | 8.60E-06    | 0.633005987 |
| cg12079322 | GALNT13;GALNT13   | 8.60E-06    | 0.632526736 |
| cg08189989 |                   | 1.18E-05    | 0.632498901 |
| cg23200020 | LOC643719         | 1.11E-05    | 0.632321222 |
| cg26452868 |                   | 0.000110797 | 0.632180073 |
| cg13539545 |                   | 1.11E-05    | 0.632086572 |
| cg11433319 | CHODL             | 1.11E-05    | 0.631972238 |
| cg17712694 | MARCH11           | 8.60E-06    | 0.631908265 |
| cg13692446 |                   | 1.11E-05    | 0.631649114 |
| cg22001496 |                   | 1.50E-05    | 0.631379303 |
| cg15690342 |                   | 8.60E-06    | 0.631061192 |
| cg16528511 | RIPPLY2           | 1.11E-05    | 0.630738712 |
| cg05835105 | PITX2;PITX2;PITX2 | 2.58E-05    | 0.628563361 |
| cg19619405 | ADAMTS20          | 1.11E-05    | 0.627461612 |
| cg26235215 | PTPRZ1;PTPRZ1     | 8.60E-06    | 0.626969288 |
| cg11033835 | ROBO2             | 5.59E-05    | 0.626484318 |
| cg24659054 | NKX6-2            | 8.60E-06    | 0.626081983 |
| cg23347718 | PCDHAC2           | 8.60E-06    | 0.626048679 |
| cg09918510 | HYDIN;HYDIN       | 2.08E-05    | 0.626011575 |
| cg21479226 |                   | 2.08E-05    | 0.625889322 |
| cg00469207 |                   | 1.50E-05    | 0.625784099 |
| cg14000361 | GCM2              | 1.11E-05    | 0.625034993 |
| cg19849428 | LRRC4C;LRRC4C     | 2.58E-05    | 0.624934852 |
| cg24892966 |                   | 1.11E-05    | 0.62485546  |
| cg12799689 | DOK6              | 8.60E-06    | 0.624629883 |
| cg25114913 | FUT9;FUT9         | 8.60E-06    | 0.624222351 |
| cg24452128 |                   | 8.60E-06    | 0.624098146 |
| cg24169669 |                   | 1.11E-05    | 0.624043635 |
| cg26533745 | NPNT;NPNT         | 2.58E-05    | 0.623861218 |
| cg04021856 | LYPD6             | 8.60E-06    | 0.623743202 |
| cg07126525 |                   | 0.000117986 | 0.623076077 |
| cg16987305 | LEPR;LEPR;LEPR    | 1.50E-05    | 0.622449748 |
| cg16670809 | ADAMTS16          | 1.50E-05    | 0.622420343 |
| cg02664812 |                   | 8.60E-06    | 0.621993206 |
| cg09858188 |                   | 8.60E-06    | 0.621970681 |
| cg00793935 | TRPM8             | 8.60E-06    | 0.621902829 |
| cg07882671 | IRX4              | 8.60E-06    | 0.621715837 |
| cg07195011 | CTNND2            | 2.58E-05    | 0.621552863 |
| cg23302649 | C14orf23;C14orf23 | 1.50E-05    | 0.621412013 |
| cg00853103 | A2BP1;A2BP1       | 8.60E-06    | 0.621241923 |
| cg16642284 | FOXI2             | 1.11E-05    | 0.620935037 |

|            |                                    |             |             |
|------------|------------------------------------|-------------|-------------|
| cg12646385 |                                    | 1.96E-05    | 0.62085948  |
| cg19859290 |                                    | 8.60E-06    | 0.620563012 |
| cg17030173 | MARCH11                            | 8.60E-06    | 0.62055452  |
| cg25316663 |                                    | 1.11E-05    | 0.620486065 |
| cg11549265 | LOC100270746;C6orf41               | 5.59E-05    | 0.620302228 |
| cg21426003 | GBX2                               | 1.50E-05    | 0.620252718 |
| cg23189410 | ZIC4;ZIC1                          | 1.11E-05    | 0.620061095 |
| cg05942459 | GRIK2;GRIK2;GRIK2                  | 8.60E-06    | 0.619903066 |
| cg20809378 |                                    | 8.60E-06    | 0.619680946 |
| cg02519751 | ZIC1                               | 3.34E-05    | 0.619538336 |
| cg18856388 |                                    | 1.11E-05    | 0.619534303 |
| cg19047660 |                                    | 8.60E-06    | 0.619520542 |
| cg27555582 |                                    | 2.58E-05    | 0.61935422  |
| cg07897248 | DCC                                | 8.60E-06    | 0.618964676 |
| cg18093372 |                                    | 8.60E-06    | 0.618644675 |
| cg06711831 | GREB1L                             | 1.96E-05    | 0.617932462 |
| cg10168149 | FLJ32063                           | 1.50E-05    | 0.617892391 |
| cg08753373 | DPYSL4                             | 8.60E-06    | 0.617865662 |
| cg09513990 |                                    | 8.60E-06    | 0.61752493  |
| cg14858267 |                                    | 8.60E-06    | 0.617504767 |
| cg02527669 | OBSL1                              | 1.11E-05    | 0.617496008 |
| cg17498101 | GJA1                               | 1.11E-05    | 0.617237873 |
| cg14487131 | FOXB2                              | 1.50E-05    | 0.616718801 |
| cg12832313 | PCDHAC2;PCDHAC2;PCDHA7;PCDHA12;PCD | 1.11E-05    | 0.616235424 |
| cg09088988 | STK32A;STK32A                      | 1.11E-05    | 0.615690943 |
| cg18349138 | CHODL                              | 1.18E-05    | 0.615686119 |
| cg09008705 | NGF                                | 2.58E-05    | 0.615443057 |
| cg19108881 | CASR                               | 1.50E-05    | 0.615364219 |
| cg00228475 |                                    | 8.60E-06    | 0.615291634 |
| cg16288089 | TAC1;TAC1;TAC1;TAC1;TAC1;TAC1;TAC1 | 8.60E-06    | 0.615119826 |
| cg16871519 | TFAP2A;TFAP2A                      | 2.58E-05    | 0.615003537 |
| cg15222899 |                                    | 8.60E-06    | 0.614957759 |
| cg12164612 | KCNA4                              | 8.60E-06    | 0.614902205 |
| cg08109850 |                                    | 8.60E-06    | 0.614762454 |
| cg10893095 |                                    | 1.50E-05    | 0.61442018  |
| cg22498143 | SPTBN4                             | 1.50E-05    | 0.614140548 |
| cg17861455 | TRPV3                              | 1.50E-05    | 0.613701777 |
| cg12845520 | C8orf47;C8orf47                    | 1.96E-05    | 0.613477579 |
| cg13155001 | PRDM5;PRDM5                        | 2.58E-05    | 0.612479636 |
| cg12112529 |                                    | 8.60E-06    | 0.612271128 |
| cg15304699 | NKX6-2                             | 8.60E-06    | 0.61206236  |
| cg17823751 |                                    | 8.60E-06    | 0.611343358 |
| cg26122980 | AMPH;AMPH;AMPH;AMPH                | 3.34E-05    | 0.611282898 |
| cg17319142 | C1QL2                              | 1.11E-05    | 0.611105225 |
| cg06516947 | ARHGAP8;PRR5-ARHGAP8;ARHGAP8       | 1.11E-05    | 0.610843457 |
| cg01396567 | MCOLN3                             | 2.58E-05    | 0.610583355 |
| cg18074954 |                                    | 8.60E-06    | 0.610556448 |
| cg09012633 | LOC100130015;LOC100130015          | 3.34E-05    | 0.610263237 |
| cg09795588 | PTF1A                              | 8.60E-06    | 0.609846092 |
| cg13246235 | PHACTR1                            | 1.50E-05    | 0.609815955 |
| cg01192487 | SAMD12;SAMD12;SAMD12;SAMD12        | 2.58E-05    | 0.609586083 |
| cg21599230 | TRAM1L1;TRAM1L1                    | 1.11E-05    | 0.609101608 |
| cg25026529 | BARHL2                             | 8.60E-06    | 0.608894467 |
| cg24946597 | NRG1;NRG1                          | 8.60E-06    | 0.608482119 |
| cg13330559 | SHISA6                             | 0.000233422 | 0.60835289  |
| cg21306240 | EPHA10;EPHA10                      | 8.60E-06    | 0.608199462 |
| cg18823007 |                                    | 1.11E-05    | 0.608196119 |
| cg21901718 | MARCH11                            | 8.60E-06    | 0.608182041 |
| cg02326806 |                                    | 8.60E-06    | 0.60789722  |
| cg10147797 | SDR42E1;SDR42E1                    | 1.50E-05    | 0.607810084 |

|            |                                     |             |             |
|------------|-------------------------------------|-------------|-------------|
| cg25537993 | ZSCAN1                              | 8.60E-06    | 0.607661936 |
| cg04842146 | RALYL;RALYL;RALYL;RALYL             | 1.96E-05    | 0.607302712 |
| cg14441976 | SLC27A6;SLC27A6                     | 8.60E-06    | 0.606520786 |
| cg15774465 | KCNB2                               | 3.34E-05    | 0.606282006 |
| cg23930856 | TFAP2B                              | 1.18E-05    | 0.606227159 |
| cg22212691 | OBSL1                               | 8.60E-06    | 0.606077868 |
| cg01389445 | LRAT                                | 8.60E-06    | 0.605729436 |
| cg20229534 | GCM2                                | 8.60E-06    | 0.605567373 |
| cg13481969 |                                     | 3.21E-05    | 0.605553897 |
| cg04347874 | NKX2-1;NKX2-1                       | 8.60E-06    | 0.605533157 |
| cg00989853 | IRF6;IRF6                           | 1.50E-05    | 0.605400387 |
| cg08729318 | TMTC1                               | 8.60E-06    | 0.604728467 |
| cg19155518 | GRIK2;GRIK2;GRIK2                   | 8.60E-06    | 0.604546536 |
| cg01518607 |                                     | 8.60E-06    | 0.604251857 |
| cg25032595 | CLDN10;CLDN10;CLDN10;CLDN10         | 1.50E-05    | 0.604185003 |
| cg26115633 | FOXI2                               | 8.60E-06    | 0.604146764 |
| cg18388380 | RGS7BP                              | 8.60E-06    | 0.603959582 |
| cg04100532 | UNC80;UNC80                         | 1.50E-05    | 0.603015584 |
| cg16729415 | GJD2                                | 8.60E-06    | 0.602848416 |
| cg19839798 | FAM155A;FAM155A                     | 1.50E-05    | 0.602786081 |
| cg02725370 | PITX2;PITX2                         | 8.60E-06    | 0.602327507 |
| cg03502002 | GALR1;GALR1                         | 1.11E-05    | 0.602207212 |
| cg18118685 | GALNT13                             | 1.11E-05    | 0.601993269 |
| cg22868282 |                                     | 1.11E-05    | 0.601922785 |
| cg01105494 | SPAG17                              | 1.50E-05    | 0.601774053 |
| cg12272837 | PPAP2C;PPAP2C;PPAP2C                | 8.60E-06    | 0.601705932 |
| cg11525643 | GJD2                                | 1.11E-05    | 0.601630419 |
| cg25145765 | GABRA2;GABRA2;GABRA2                | 3.21E-05    | 0.601507709 |
| cg10156125 | UGT8;UGT8                           | 4.34E-05    | 0.601209049 |
| cg24150623 | MIR125B1;LOC399959                  | 4.34E-05    | 0.60091972  |
| cg26902216 | MAL2                                | 1.96E-05    | 0.600587875 |
| cg06781135 | LOC100270746;C6orf41                | 0.000148457 | 0.600182462 |
| cg05494604 |                                     | 8.60E-06    | 0.599996571 |
| cg17632579 | PRSS12                              | 8.60E-06    | 0.59922418  |
| cg26871372 |                                     | 8.60E-06    | 0.599020003 |
| cg05647859 | LIN7A                               | 1.50E-05    | 0.598977871 |
| cg16086620 | CHGA;CHGA                           | 8.60E-06    | 0.598822426 |
| cg20984053 | MNX1;MNX1                           | 8.60E-06    | 0.598771763 |
| cg07150062 | ASPG                                | 4.34E-05    | 0.598551873 |
| cg20872937 | GALR1                               | 1.11E-05    | 0.598512548 |
| cg25485875 | NKX6-2                              | 1.11E-05    | 0.598464802 |
| cg24938830 | UNC80;UNC80                         | 8.60E-06    | 0.598374958 |
| cg17211349 | SLITRK3                             | 8.60E-06    | 0.598365049 |
| cg08445802 |                                     | 1.96E-05    | 0.598295946 |
| cg07204280 | CIDEA;CIDEA                         | 3.21E-05    | 0.598146157 |
| cg08564661 | PLEKHA1                             | 7.23E-05    | 0.598122138 |
| cg23709528 |                                     | 8.60E-06    | 0.598059821 |
| cg09799983 | CYP1B1                              | 3.34E-05    | 0.597666024 |
| cg03352106 | KCNJ8                               | 8.60E-06    | 0.597316667 |
| cg13879483 | USP44;USP44                         | 2.58E-05    | 0.597183269 |
| cg00058329 | P2RX2;P2RX2;P2RX2;P2RX2;P2RX2;P2RX2 | 8.60E-06    | 0.597078387 |
| cg03686593 | FAM38B                              | 3.34E-05    | 0.596844595 |
| cg00795341 | THBS4                               | 1.96E-05    | 0.596702748 |
| cg00303548 | HS6ST3                              | 8.60E-06    | 0.596494893 |
| cg10530851 | NKX2-8                              | 1.50E-05    | 0.596095242 |
| cg21195256 | C14orf23;C14orf23                   | 3.34E-05    | 0.595719297 |
| cg24862510 |                                     | 2.08E-05    | 0.5956401   |
| cg25218716 | FOXA2;FOXA2                         | 2.58E-05    | 0.595630873 |
| cg26636193 |                                     | 8.60E-06    | 0.595375493 |
| cg01261798 | DPYSL4                              | 1.11E-05    | 0.595319731 |

|            |                               |             |             |
|------------|-------------------------------|-------------|-------------|
| cg07449450 | USH1C;USH1C                   | 1.18E-05    | 0.595015396 |
| cg23034799 | CADM1;CADM1                   | 8.60E-06    | 0.594965478 |
| cg21039708 | OTX2OS1                       | 5.59E-05    | 0.594957004 |
| cg12778215 | DKK3;DKK3;DKK3;DKK3           | 0.000117986 | 0.594955552 |
| cg13445796 | DBX1                          | 1.11E-05    | 0.594949496 |
| cg18560328 | SYT9                          | 2.58E-05    | 0.594945384 |
| cg02764245 |                               | 2.58E-05    | 0.594936636 |
| cg10961753 | HOXC13                        | 8.60E-06    | 0.594606209 |
| cg10298557 | RORA                          | 1.96E-05    | 0.594533562 |
| cg07149609 |                               | 1.50E-05    | 0.59449661  |
| cg26307359 | SEZ6;SEZ6                     | 8.60E-06    | 0.594343992 |
| cg12530864 |                               | 2.58E-05    | 0.594195771 |
| cg27032232 | DPP6;DPP6                     | 1.11E-05    | 0.594095718 |
| cg22538054 | USP44;USP44                   | 1.11E-05    | 0.593788409 |
| cg01735384 |                               | 1.11E-05    | 0.593771988 |
| cg00063174 | WDR69                         | 8.60E-06    | 0.593696974 |
| cg13919148 | INADL;INADL                   | 3.34E-05    | 0.593431498 |
| cg05728754 |                               | 1.80E-05    | 0.59320795  |
| cg08234308 | LEPR;LEPR;LEPR                | 8.60E-06    | 0.593042497 |
| cg14644001 | PRRT1                         | 1.96E-05    | 0.592991901 |
| cg15556502 | MIR129-2                      | 1.11E-05    | 0.592805093 |
| cg14564616 |                               | 1.11E-05    | 0.592504573 |
| cg08597761 | HYDIN;HYDIN;HYDIN;HYDIN       | 8.60E-06    | 0.592452079 |
| cg24480695 | IGSF22                        | 1.11E-05    | 0.592431092 |
| cg00034076 | RALYL;RALYL;RALYL;RALYL;RALYL | 8.60E-06    | 0.592413498 |
| cg23291534 | KCNV1                         | 8.60E-06    | 0.592346869 |
| cg23992410 | PROX1                         | 1.96E-05    | 0.592291346 |
| cg04804377 | RAD51AP2                      | 1.96E-05    | 0.592257262 |
| cg12912737 | REM1                          | 1.50E-05    | 0.592145517 |
| cg06619066 | CHST9;CHST9                   | 8.60E-06    | 0.59207177  |
| cg08183141 | MYH14;MYH14;MYH14             | 8.60E-06    | 0.591381858 |
| cg14523847 | DPP6;DPP6                     | 8.60E-06    | 0.591232482 |
| cg13096007 | SOD3                          | 1.96E-05    | 0.591107999 |
| cg04747226 | GRIA4;GRIA4;GRIA4;GRIA4       | 0.000205664 | 0.591028766 |
| cg13916459 | ALX1                          | 8.60E-06    | 0.590856145 |
| cg23342718 |                               | 8.60E-06    | 0.59084896  |
| cg03580297 | LPPR4;LPPR4                   | 1.11E-05    | 0.590759751 |
| cg01995743 | SLC35F1                       | 8.60E-06    | 0.590718583 |
| cg00683332 |                               | 8.60E-06    | 0.590615674 |
| cg05362548 | TDH                           | 1.96E-05    | 0.59049024  |
| cg02758612 |                               | 8.60E-06    | 0.590444921 |
| cg14356608 |                               | 8.60E-06    | 0.590382516 |
| cg00697992 | NXPH2                         | 8.60E-06    | 0.589938044 |
| cg02466815 | HOXD1                         | 8.60E-06    | 0.589877668 |
| cg18542829 | ABCY1;RUNDC3B;RUNDC3B;RUNDC3B | 4.34E-05    | 0.589868251 |
| cg03738025 |                               | 1.50E-05    | 0.589774147 |
| cg13696942 | DBX1                          | 8.60E-06    | 0.589396699 |
| cg27323784 |                               | 8.60E-06    | 0.589330254 |
| cg10192893 | PHOX2B                        | 1.11E-05    | 0.589220569 |
| cg17484671 |                               | 8.60E-06    | 0.589189444 |
| cg09979478 |                               | 1.50E-05    | 0.589053796 |
| cg17280346 | ZIC1                          | 1.50E-05    | 0.588961216 |
| cg26134895 | FBXL7                         | 1.11E-05    | 0.588791838 |
| cg08782022 | MGRN1;MGRN1;MGRN1;MGRN1       | 1.96E-05    | 0.588540023 |
| cg02023345 | TMEM26                        | 5.59E-05    | 0.588496621 |
| cg05452524 | HLF                           | 0.000122184 | 0.588473996 |
| cg05452406 | GCM2                          | 1.96E-05    | 0.588440357 |
| cg12518442 | BMP7                          | 0.000233422 | 0.588288298 |
| cg08073312 | SOX14                         | 1.96E-05    | 0.588202268 |
| cg25566352 | RFX4                          | 1.11E-05    | 0.588126904 |

|            |                                    |          |             |
|------------|------------------------------------|----------|-------------|
| cg11174855 | NKX6-2                             | 2.80E-05 | 0.587975615 |
| cg19597382 | POU4F2                             | 8.60E-06 | 0.587896024 |
| cg12072964 | LAMA1                              | 8.60E-06 | 0.587442695 |
| cg01959730 |                                    | 1.96E-05 | 0.586481162 |
| cg27199384 | A2BP1;A2BP1;A2BP1                  | 8.60E-06 | 0.58608194  |
| cg12473406 | GREB1L                             | 9.24E-05 | 0.585812921 |
| cg27122213 | OTX2                               | 2.58E-05 | 0.585761453 |
| cg24744430 | RAB32                              | 7.23E-05 | 0.585657849 |
| cg10658542 | SYT10;SYT10                        | 1.96E-05 | 0.585166681 |
| cg19052355 | GBX2                               | 5.59E-05 | 0.584993328 |
| cg14118515 | EVX2                               | 1.96E-05 | 0.584703773 |
| cg09626894 | CFTR                               | 8.60E-06 | 0.584699238 |
| cg09064304 |                                    | 4.34E-05 | 0.584611287 |
| cg04555373 | NRG1                               | 8.60E-06 | 0.584553953 |
| cg17768491 | SPTBN4                             | 8.60E-06 | 0.584294435 |
| cg07129523 | PCDHB4                             | 8.60E-06 | 0.584189075 |
| cg09942248 | NEUROD1                            | 1.11E-05 | 0.583931334 |
| cg07014673 |                                    | 8.60E-06 | 0.583892843 |
| cg01697732 | FAM20A                             | 1.96E-05 | 0.583510846 |
| cg01184975 |                                    | 1.11E-05 | 0.583462782 |
| cg21995304 |                                    | 1.96E-05 | 0.583435806 |
| cg01227537 | ZIC1                               | 3.34E-05 | 0.583355824 |
| cg04475027 | TMEM132C                           | 2.58E-05 | 0.583310301 |
| cg14991984 | LPPR5;LPPR5                        | 2.58E-05 | 0.583262065 |
| cg25834419 | GOLSYN;GOLSYN;GOLSYN;GOLSYN;GOLSYN | 1.50E-05 | 0.58309747  |
| cg14520424 |                                    | 1.11E-05 | 0.583096069 |
| cg05901765 | MARVELD2;MARVELD2                  | 1.11E-05 | 0.582957717 |
| cg23160016 | GABRA2;GABRA2;GABRA2               | 2.58E-05 | 0.582954148 |
| cg06926934 | NR2F2;NR2F2;NR2F2;MIR1469;NR2F2    | 1.18E-05 | 0.582500188 |
| cg07962143 |                                    | 8.60E-06 | 0.582134794 |
| cg03098837 | DPY19L2P4                          | 1.60E-05 | 0.582123    |
| cg08464190 | CBLN1                              | 1.11E-05 | 0.581842829 |
| cg08002883 | FGF12;FGF12                        | 8.60E-06 | 0.581803563 |
| cg08146483 | LHX8                               | 8.60E-06 | 0.581790708 |
| cg04249522 |                                    | 3.34E-05 | 0.581750738 |
| cg10355837 | CACNG4                             | 2.58E-05 | 0.581693918 |
| cg23065934 | MARCH11                            | 1.96E-05 | 0.58166775  |
| cg19456540 | SIX6                               | 8.60E-06 | 0.581579239 |
| cg12836011 | TLL1                               | 8.60E-06 | 0.581550232 |
| cg27513979 | HS6ST3                             | 8.60E-06 | 0.58148608  |
| cg00582971 | GRM6                               | 3.34E-05 | 0.581331511 |
| cg00757731 | MAGI1;MAGI1;MAGI1                  | 1.11E-05 | 0.581161383 |
| cg03007522 | GATA4                              | 1.50E-05 | 0.581058034 |
| cg27505273 | SOX14                              | 1.96E-05 | 0.581022383 |
| cg14603098 | ACCN1                              | 3.21E-05 | 0.580904741 |
| cg14084091 |                                    | 8.60E-06 | 0.580844829 |
| cg03823904 | SEMA3C;SEMA3C                      | 5.59E-05 | 0.580816991 |
| cg03970036 | PTPRN                              | 1.11E-05 | 0.580813944 |
| cg11821440 | TBC1D12                            | 1.11E-05 | 0.58078253  |
| cg22795586 |                                    | 8.60E-06 | 0.580759149 |
| cg04632671 | PPARG;PPARG;PPARG                  | 1.50E-05 | 0.580645593 |
| cg13096208 | ST8SIA3;ST8SIA3                    | 8.60E-06 | 0.580407181 |
| cg27393010 |                                    | 8.60E-06 | 0.580262516 |
| cg25051529 | SLC25A21;SLC25A21;LOC100129794     | 8.60E-06 | 0.5802523   |
| cg14445814 | DBC1                               | 8.60E-06 | 0.580226952 |
| cg11499970 | FBLL1                              | 8.60E-06 | 0.580190486 |
| cg09919570 |                                    | 8.60E-06 | 0.58015708  |
| cg11361636 |                                    | 8.60E-06 | 0.580136154 |
| cg14745270 | GOLSYN;GOLSYN;GOLSYN;GOLSYN        | 1.50E-05 | 0.580056981 |
| cg06418871 | MARVELD2;MARVELD2                  | 8.60E-06 | 0.579995209 |

|            |                                     |             |             |
|------------|-------------------------------------|-------------|-------------|
| cg00515457 |                                     | 8.60E-06    | 0.57989448  |
| cg23727983 | DDX25;PUS3                          | 8.60E-06    | 0.579873018 |
| cg15133351 | EVX2                                | 2.39E-05    | 0.57981194  |
| cg04865180 |                                     | 1.96E-05    | 0.579809102 |
| cg04996219 | CTNND2                              | 2.58E-05    | 0.57973596  |
| cg10568066 | RNF39;RNF39                         | 0.000117986 | 0.579600665 |
| cg17677490 |                                     | 1.11E-05    | 0.579508605 |
| cg06083330 | POU4F2                              | 3.34E-05    | 0.579447887 |
| cg11649981 |                                     | 8.60E-06    | 0.579407998 |
| cg10566121 | MPPED2                              | 0.000117986 | 0.57920377  |
| cg13208832 | FAM149A                             | 0.000290372 | 0.579199062 |
| cg10034890 | DNER                                | 3.34E-05    | 0.57914362  |
| cg19776515 | SDR16C5                             | 8.60E-06    | 0.579126552 |
| cg04111071 | TMEM196                             | 8.60E-06    | 0.578767924 |
| cg11723850 |                                     | 8.60E-06    | 0.578672939 |
| cg23997263 | FUT9                                | 8.60E-06    | 0.578544685 |
| cg02064106 | C6orf118                            | 8.60E-06    | 0.578484368 |
| cg03117976 | FAM38B                              | 5.59E-05    | 0.578413119 |
| cg27275352 | CILP2                               | 8.60E-06    | 0.578210195 |
| cg25547580 | ONECUT2                             | 4.34E-05    | 0.577957478 |
| cg00396667 | PITX1                               | 8.60E-06    | 0.577804356 |
| cg26947626 |                                     | 1.11E-05    | 0.577716568 |
| cg03553786 | LOC285375                           | 2.58E-05    | 0.577714569 |
| cg11792516 | HOOK1                               | 8.60E-06    | 0.577712295 |
| cg25088758 | COL25A1;COL25A1;COL25A1;COL25A1     | 8.60E-06    | 0.577492992 |
| cg16887264 | POU4F2                              | 3.21E-05    | 0.577479869 |
| cg00309582 | BMP7                                | 0.000187194 | 0.577331458 |
| cg10511988 | VAX1                                | 8.60E-06    | 0.576586512 |
| cg14094960 | EGFR;EGFR;EGFR;EGFR;EGFR;EGFR;EGFR; | 1.50E-05    | 0.57654239  |
| cg16240368 | SPAG17                              | 8.60E-06    | 0.576195317 |
| cg03646889 | LPPR4;LPPR4                         | 8.60E-06    | 0.576092235 |
| cg11929643 | CELSR3                              | 7.23E-05    | 0.57591098  |
| cg04360793 | ELTD1;ELTD1                         | 1.96E-05    | 0.575806675 |
| cg17840719 | ZNF454;ZNF454                       | 3.34E-05    | 0.575781351 |
| cg16392213 | FEZF1;FEZF1                         | 8.60E-06    | 0.57545655  |
| cg23944251 | LOC100128811;GPR158                 | 1.11E-05    | 0.575163835 |
| cg02147443 |                                     | 1.11E-05    | 0.574880379 |
| cg12892506 | ZIC4;ZIC4;ZIC4                      | 7.23E-05    | 0.574829021 |
| cg01739725 |                                     | 8.60E-06    | 0.574748194 |
| cg26860935 |                                     | 8.60E-06    | 0.57432902  |
| cg22731271 | MEIS1                               | 1.60E-05    | 0.574304946 |
| cg19029181 | ZIC1                                | 1.11E-05    | 0.574301406 |
| cg12248614 | SPTBN4                              | 1.11E-05    | 0.574296787 |
| cg26650638 |                                     | 1.96E-05    | 0.574213738 |
| cg02217786 |                                     | 8.60E-06    | 0.573937463 |
| cg19697530 | CADM1;CADM1                         | 1.96E-05    | 0.573553796 |
| cg06782035 | MARCH11                             | 1.50E-05    | 0.573359788 |
| cg07411620 | EVX2                                | 1.11E-05    | 0.573313207 |
| cg13390867 |                                     | 8.60E-06    | 0.573287018 |
| cg24393316 | FOXE1                               | 8.60E-06    | 0.573080182 |
| cg05983315 | ZSCAN1                              | 8.60E-06    | 0.57304461  |
| cg12516059 | AVPR1A;AVPR1A                       | 8.60E-06    | 0.57293603  |
| cg13786089 | ZFR2;ZFR2;ZFR2                      | 8.60E-06    | 0.572651327 |
| cg05375728 | DAB1                                | 8.60E-06    | 0.5726451   |
| cg06785999 | SIX6;SIX6                           | 8.60E-06    | 0.572570157 |
| cg13251269 | GPR85;GPR85;GPR85;GPR85;GPR85       | 8.60E-06    | 0.572442993 |
| cg26460471 | GRP;GRP;GRP                         | 5.59E-05    | 0.572405578 |
| cg16847696 | GPR37                               | 8.60E-06    | 0.572277808 |
| cg22635491 | TBX3;TBX3                           | 8.60E-06    | 0.572258349 |
| cg26721264 | GALR1                               | 8.60E-06    | 0.572088196 |



|            |                                       |             |             |
|------------|---------------------------------------|-------------|-------------|
| cg13072241 | GPR126;GPR126;GPR126;GPR126           | 1.50E-05    | 0.57191514  |
| cg11130317 |                                       | 8.60E-06    | 0.571681312 |
| cg27655158 |                                       | 1.18E-05    | 0.571439475 |
| cg16727201 | CIDEA;CIDEA                           | 1.96E-05    | 0.57131973  |
| cg26828909 | SAMD12;SAMD12;SAMD12;SAMD12           | 3.34E-05    | 0.571174964 |
| cg26993729 | LRAT                                  | 8.60E-06    | 0.571167219 |
| cg06335867 | NXPH1                                 | 1.50E-05    | 0.571115238 |
| cg06598836 |                                       | 1.11E-05    | 0.570934181 |
| cg26678605 |                                       | 8.60E-06    | 0.570930347 |
| cg15471815 | HIST3H2BB;HIST3H2A                    | 8.60E-06    | 0.570663919 |
| cg09438147 | UNC80;UNC80                           | 8.60E-06    | 0.570646451 |
| cg09602288 |                                       | 8.60E-06    | 0.570567164 |
| cg17949440 | LRR4C;LRR4C                           | 2.58E-05    | 0.570489877 |
| cg25092681 | MARCH11                               | 1.50E-05    | 0.570370777 |
| cg05387519 | AGBL4                                 | 8.60E-06    | 0.570369663 |
| cg10512875 | TMTC1                                 | 8.60E-06    | 0.570185592 |
| cg05781968 | WNT5A                                 | 5.59E-05    | 0.570136916 |
| cg04737916 | P2RX2;P2RX2;P2RX2;P2RX2;P2RX2;P2RX2   | 8.60E-06    | 0.570047156 |
| cg05327835 | IDUA                                  | 4.34E-05    | 0.569962491 |
| cg09930033 | RFX6                                  | 8.60E-06    | 0.569962489 |
| cg05904135 | NKX6-2                                | 8.60E-06    | 0.569832867 |
| cg24710320 | MGC2889;HRASLS                        | 3.34E-05    | 0.569787535 |
| cg15718581 | ZFP42                                 | 2.80E-05    | 0.569632436 |
| cg12848065 | LOC200726                             | 8.60E-06    | 0.569602531 |
| cg22455914 | LAMA1                                 | 3.34E-05    | 0.569501821 |
| cg02910208 | VSTM2A;VSTM2A                         | 8.60E-06    | 0.569148893 |
| cg05876564 | EFNB2                                 | 3.92E-05    | 0.568989761 |
| cg15820062 |                                       | 4.34E-05    | 0.568872461 |
| cg13080565 | GRIK2;GRIK2;GRIK2                     | 1.96E-05    | 0.568788495 |
| cg02681442 | FOXP1                                 | 4.34E-05    | 0.568784337 |
| cg18322569 | BARHL2;BARHL2                         | 5.59E-05    | 0.568769493 |
| cg04584301 | PCSK2                                 | 8.60E-06    | 0.568554701 |
| cg16485558 | RNF180;RNF180                         | 1.50E-05    | 0.56851155  |
| cg13495205 | AJAP1;AJAP1                           | 2.58E-05    | 0.568395399 |
| cg02991338 | FOXP1                                 | 1.96E-05    | 0.568361548 |
| cg07792478 | MIR124-2                              | 1.50E-05    | 0.568327341 |
| cg01851399 | PKP2;PKP2                             | 1.50E-05    | 0.567974482 |
| cg03111404 |                                       | 1.50E-05    | 0.567739298 |
| cg17470327 | ROBO2                                 | 8.60E-06    | 0.567685629 |
| cg15146859 | GALR1                                 | 1.11E-05    | 0.56761376  |
| cg26059153 | MACROD2;MACROD2                       | 0.000187194 | 0.567600832 |
| cg21199922 | FLJ13197                              | 1.50E-05    | 0.567564665 |
| cg01422476 | C16orf73;C16orf73                     | 8.60E-06    | 0.567551301 |
| cg24436446 | UGGT2;UGGT2                           | 8.60E-06    | 0.567510995 |
| cg10741025 | PAX9                                  | 1.96E-05    | 0.567435591 |
| cg25150243 | SLC27A2;SLC27A2                       | 1.50E-05    | 0.567330583 |
| cg26621790 |                                       | 8.60E-06    | 0.567257684 |
| cg08827307 | ADAM32                                | 8.60E-06    | 0.567239708 |
| cg25741487 |                                       | 2.58E-05    | 0.56710571  |
| cg20888142 | SYN2;SYN2                             | 1.50E-05    | 0.567086486 |
| cg09424526 | PAX3;PAX3;PAX3;CCDC140;PAX3;PAX3;PAX3 | 1.96E-05    | 0.567022289 |
| cg08607018 |                                       | 3.34E-05    | 0.567006663 |
| cg21705897 | HMGCLL1;HMGCLL1                       | 2.58E-05    | 0.56698938  |
| cg06629130 |                                       | 1.96E-05    | 0.566891748 |
| cg14511946 |                                       | 1.96E-05    | 0.566850497 |
| cg20551181 | SLC6A5                                | 3.21E-05    | 0.566791572 |
| cg11856810 | KCNJ3                                 | 1.11E-05    | 0.566673935 |
| cg12836959 |                                       | 8.60E-06    | 0.566622737 |
| cg13347257 | LHFPL4                                | 8.60E-06    | 0.566596406 |
| cg18952796 | NPTX2;NPTX2                           | 1.50E-05    | 0.566514027 |

|            |                                       |             |             |
|------------|---------------------------------------|-------------|-------------|
| cg24638326 | C1orf92                               | 1.50E-05    | 0.566444306 |
| cg04515996 | TBX18                                 | 1.50E-05    | 0.566191873 |
| cg07068327 | GPR123                                | 4.34E-05    | 0.565878333 |
| cg19019537 | C8orf42                               | 9.24E-05    | 0.5657848   |
| cg27236875 | ERBB4;ERBB4                           | 8.60E-06    | 0.565760234 |
| cg04022063 | TJP1;TJP1;TJP1;TJP1                   | 1.11E-05    | 0.565505617 |
| cg08190858 |                                       | 1.50E-05    | 0.565495847 |
| cg01426853 | TMEM229A                              | 4.34E-05    | 0.565404924 |
| cg18147485 | KCNV1;KCNV1                           | 8.60E-06    | 0.565397297 |
| cg01116059 | SNCAIP                                | 2.58E-05    | 0.565334244 |
| cg17025835 | TMEM229A;TMEM229A                     | 3.34E-05    | 0.565201765 |
| cg09639725 | GPR123                                | 0.000117986 | 0.56515611  |
| cg11775837 | STXBP6                                | 5.11E-05    | 0.565136522 |
| cg15415452 |                                       | 3.34E-05    | 0.565013836 |
| cg26320830 | MARCH1;MARCH1                         | 8.60E-06    | 0.56497823  |
| cg12400336 | TJP1;TJP1                             | 3.34E-05    | 0.564936869 |
| cg04534765 | GALR1;GALR1                           | 8.60E-06    | 0.564929826 |
| cg19099050 | LHFPL4                                | 8.60E-06    | 0.564886772 |
| cg25702335 | CLDN10;CLDN10;CLDN10                  | 8.60E-06    | 0.564862269 |
| cg04248446 |                                       | 8.60E-06    | 0.564638162 |
| cg26466587 | MCHR2;MCHR2                           | 9.24E-05    | 0.564628795 |
| cg02090033 | MAGI1;MAGI1;MAGI1                     | 8.60E-06    | 0.564625567 |
| cg11930554 |                                       | 0.000117986 | 0.564609256 |
| cg11203512 | CCDC67                                | 2.58E-05    | 0.564562874 |
| cg21517947 | SFRP1                                 | 8.60E-06    | 0.564555462 |
| cg10188823 | NEFH;NEFH                             | 8.60E-06    | 0.564419644 |
| cg08699935 |                                       | 7.23E-05    | 0.564388781 |
| cg20122943 | CACNG8                                | 1.11E-05    | 0.564302318 |
| cg15124757 | RAD51AP2                              | 4.34E-05    | 0.564131883 |
| cg25368122 | LHX8                                  | 1.11E-05    | 0.564108736 |
| cg13023623 | OTX2                                  | 8.60E-06    | 0.563969096 |
| cg22302985 | FAM155A                               | 8.60E-06    | 0.563919494 |
| cg27464184 |                                       | 8.60E-06    | 0.563880891 |
| cg06515144 | NPHS2                                 | 8.60E-06    | 0.563858093 |
| cg04742780 | GATA5                                 | 2.39E-05    | 0.56377222  |
| cg18206017 | RIPPLY2                               | 8.60E-06    | 0.563687757 |
| cg15133018 |                                       | 2.08E-05    | 0.563615833 |
| cg11163975 | TRAM1L1                               | 1.50E-05    | 0.563590289 |
| cg24378692 | PLOD2;PLOD2;PLOD2;PLOD2               | 8.60E-06    | 0.563542712 |
| cg27264249 | CNTN4                                 | 8.60E-06    | 0.563506227 |
| cg03364108 | C22orf45;C22orf45;UPB1                | 8.60E-06    | 0.56346851  |
| cg26547924 | KCNK2;KCNK2;KCNK2                     | 1.60E-05    | 0.563322569 |
| cg27189087 | RAX                                   | 4.34E-05    | 0.563260394 |
| cg09082903 | NPY1R                                 | 3.34E-05    | 0.563252673 |
| cg23546474 | PAX3;PAX3;PAX3;CCDC140;CCDC140;PAX3;P | 8.60E-06    | 0.563007356 |
| cg21331821 | ZSCAN1                                | 8.60E-06    | 0.562980041 |
| cg04251368 | KCNQ1DN                               | 8.60E-06    | 0.562966415 |
| cg16462462 | C8orf85                               | 1.96E-05    | 0.56294261  |
| cg02656891 | C1orf94;C1orf94                       | 8.60E-06    | 0.562875637 |
| cg22841810 | EBF2                                  | 1.96E-05    | 0.562846209 |
| cg16232126 | SLC5A7;SLC5A7                         | 8.60E-06    | 0.562794764 |
| cg15031661 | FMN2                                  | 1.11E-05    | 0.562644271 |
| cg25539045 | FOXI2                                 | 1.50E-05    | 0.562617728 |
| cg19898128 | TLL1;TLL1                             | 1.60E-05    | 0.562546337 |
| cg01445580 | C1orf94;CSMD2                         | 4.34E-05    | 0.562362976 |
| cg12200038 |                                       | 1.11E-05    | 0.562235426 |
| cg03177042 |                                       | 1.50E-05    | 0.561931172 |
| cg19761848 | GBX2                                  | 1.50E-05    | 0.561910232 |
| cg18794839 | KCNK2;KCNK2;KCNK2                     | 8.60E-06    | 0.561861783 |
| cg16967640 | LMX1A                                 | 8.60E-06    | 0.561859933 |

|            |                                     |             |             |
|------------|-------------------------------------|-------------|-------------|
| cg22096450 | ZNF215;ZNF215                       | 3.34E-05    | 0.561727391 |
| cg18249580 |                                     | 1.11E-05    | 0.561546091 |
| cg05290695 | SAMD12;SAMD12                       | 1.60E-05    | 0.561537194 |
| cg22572159 | NGF                                 | 1.96E-05    | 0.561359147 |
| cg10941747 | BMP7                                | 0.000233422 | 0.56132911  |
| cg16937268 |                                     | 1.50E-05    | 0.561326909 |
| cg05013064 | TFAP2C                              | 9.24E-05    | 0.561274093 |
| cg08566455 |                                     | 1.11E-05    | 0.561120088 |
| cg14781189 | KCNH7;KCNH7;KCNH7;KCNH7             | 1.96E-05    | 0.561090717 |
| cg12378187 | FEZF2                               | 0.000290372 | 0.561069443 |
| cg25124276 | LOC100128811;GPR158                 | 1.11E-05    | 0.561059667 |
| cg09273054 | MAL2                                | 0.000290372 | 0.560910951 |
| cg00767642 | NMNAT2;NMNAT2                       | 9.24E-05    | 0.56085188  |
| cg24714106 | LOC145845                           | 1.96E-05    | 0.56084786  |
| cg19391276 | PRDM13                              | 8.60E-06    | 0.560841014 |
| cg15825786 | GPR123                              | 5.59E-05    | 0.560804634 |
| cg06304097 | TCERG1L                             | 8.60E-06    | 0.560801031 |
| cg27659049 |                                     | 1.50E-05    | 0.560781982 |
| cg22491927 | CACNA1A;CACNA1A;CACNA1A;CACNA1A     | 1.50E-05    | 0.560548563 |
| cg08535600 | OXTR;OXTR                           | 1.11E-05    | 0.560493607 |
| cg05649108 | BRUNOL4;BRUNOL4;BRUNOL4;BRUNOL4     | 8.60E-06    | 0.560425423 |
| cg07676859 | SSTR4                               | 1.50E-05    | 0.560242503 |
| cg03572772 | PCDHB15                             | 8.60E-06    | 0.56023637  |
| cg08227526 |                                     | 1.50E-05    | 0.560236185 |
| cg26559315 | LYNX1;LYNX1;LYNX1;LYNX1;LYNX1       | 3.34E-05    | 0.560234386 |
| cg10028929 |                                     | 8.60E-06    | 0.560155395 |
| cg12097222 | EFHA2                               | 2.58E-05    | 0.559977529 |
| cg20265661 | LYPD1;LYPD1                         | 1.96E-05    | 0.559725062 |
| cg23906738 | NKX2-1;NKX2-1                       | 3.21E-05    | 0.559686368 |
| cg15489250 |                                     | 8.60E-06    | 0.559639521 |
| cg05860723 | MYF6                                | 8.60E-06    | 0.559603187 |
| cg02051771 | PCDHA7;PCDHA12;PCDHA6;PCDHA10;PCDHA | 1.11E-05    | 0.559595849 |
| cg07166654 |                                     | 1.96E-05    | 0.559528314 |
| cg07780095 | ALX1                                | 8.60E-06    | 0.559509346 |
| cg10277927 | TRAM1L1                             | 5.59E-05    | 0.559466969 |
| cg24727311 | C8orf48                             | 8.60E-06    | 0.559378787 |
| cg17405234 | FAM190A                             | 1.11E-05    | 0.559363938 |
| cg06346974 | DNAJC6                              | 1.11E-05    | 0.559357138 |
| cg21145136 | SH3GL3;SH3GL3;SH3GL3                | 1.96E-05    | 0.55928753  |
| cg14743462 | HIST3H2A                            | 1.50E-05    | 0.559210439 |
| cg00575005 | RIPPLY2                             | 1.11E-05    | 0.559140204 |
| cg11413039 | PUS3;DDX25                          | 2.58E-05    | 0.559136179 |
| cg02788400 | DZIP1;DZIP1                         | 8.60E-06    | 0.559132646 |
| cg20014960 | PAMR1;PAMR1                         | 1.96E-05    | 0.559065397 |
| cg20388294 | RND3                                | 1.50E-05    | 0.559039181 |
| cg11777523 | GPR148                              | 7.23E-05    | 0.558969902 |
| cg26558485 | CYP4X1;CYP4X1                       | 1.50E-05    | 0.558935492 |
| cg24675150 |                                     | 4.34E-05    | 0.558694552 |
| cg14699728 | NPAS4;NPAS4                         | 8.60E-06    | 0.558678251 |
| cg11254700 |                                     | 2.58E-05    | 0.558537107 |
| cg13682019 | MATN2;MATN2                         | 2.58E-05    | 0.558313192 |
| cg09876651 | MIR618;LIN7A                        | 8.60E-06    | 0.558236481 |
| cg12250896 | DPYSL4                              | 1.11E-05    | 0.558169932 |
| cg05064645 | EGFR;EGFR;EGFR;EGFR;EGFR;EGFR;EGFR; | 3.34E-05    | 0.558157615 |
| cg00699993 | GRIA2;GRIA2;GRIA2                   | 1.11E-05    | 0.558145201 |
| cg26817217 | TOX3;TOX3                           | 3.34E-05    | 0.558131502 |
| cg26866482 | ASCL1                               | 5.59E-05    | 0.558062666 |
| cg22280038 | MAGI2                               | 1.11E-05    | 0.558023304 |
| cg02874376 | DLK1;DLK1                           | 1.11E-05    | 0.557982813 |
| cg03692651 |                                     | 1.96E-05    | 0.557849117 |

|            |                                      |             |             |
|------------|--------------------------------------|-------------|-------------|
| cg23649435 | STOX2                                | 2.58E-05    | 0.557719322 |
| cg23999695 |                                      | 1.96E-05    | 0.557570034 |
| cg05167251 | HOXD9;HOXD9                          | 8.60E-06    | 0.557500988 |
| cg25984671 | TCF15                                | 1.50E-05    | 0.557496444 |
| cg19206146 |                                      | 8.60E-06    | 0.557489934 |
| cg02770054 | ATP4A                                | 8.60E-06    | 0.557358139 |
| cg15123692 | KLHL29                               | 8.60E-06    | 0.557321212 |
| cg15457058 | FOXE3                                | 5.59E-05    | 0.557310657 |
| cg00663077 | ZFP42                                | 1.50E-05    | 0.557272241 |
| cg15637465 | SLIT3                                | 1.50E-05    | 0.557007898 |
| cg21189438 | C9orf122                             | 1.96E-05    | 0.556854537 |
| cg18863595 | GRM7;GRM7;GRM7;GRM7                  | 1.50E-05    | 0.556799151 |
| cg00001747 |                                      | 1.50E-05    | 0.556660739 |
| cg26675876 | XKR6                                 | 5.59E-05    | 0.556517526 |
| cg17774559 | IRX4                                 | 8.60E-06    | 0.556508117 |
| cg15030849 | COX6B2;COX6B2                        | 1.96E-05    | 0.556481414 |
| cg23026864 | PCDHA7;PCDHA12;PCDHA6;PCDHAC1;PCDH   | 1.11E-05    | 0.556322956 |
| cg22403811 | RALYL;RALYL;RALYL;RALYL;RALYL        | 8.60E-06    | 0.556309964 |
| cg08182446 | GABRG3                               | 1.96E-05    | 0.556268256 |
| cg19885761 | CPLX2;CPLX2                          | 8.60E-06    | 0.5562392   |
| cg17928584 | STK32A;STK32A                        | 1.50E-05    | 0.556176032 |
| cg06769546 | NKX6-2                               | 8.60E-06    | 0.556164796 |
| cg18363918 | IGLON5                               | 8.60E-06    | 0.556089251 |
| cg06783737 |                                      | 1.50E-05    | 0.555971988 |
| cg14029968 | TBC1D12                              | 5.59E-05    | 0.555954635 |
| cg11857704 |                                      | 8.60E-06    | 0.555816847 |
| cg20438306 | PHOX2B                               | 1.50E-05    | 0.555791476 |
| cg25191850 | KCNK1                                | 2.58E-05    | 0.555770594 |
| cg24353443 | PDZRN3                               | 8.60E-06    | 0.555742162 |
| cg12456714 | MARCH11                              | 1.11E-05    | 0.555713103 |
| cg03062564 |                                      | 8.60E-06    | 0.555696485 |
| cg20560075 | PPP2R2B;PPP2R2B;PPP2R2B;PPP2R2B;PPP2 | 0.000102908 | 0.555696064 |
| cg17397028 | FAM190A                              | 2.16E-05    | 0.555685673 |
| cg19871940 |                                      | 8.60E-06    | 0.555682094 |
| cg21646598 | ADAMTS5                              | 0.000123078 | 0.555611873 |
| cg17426273 | NEBL                                 | 5.59E-05    | 0.555555899 |
| cg05513806 | SOX2OT                               | 8.60E-06    | 0.555551653 |
| cg08480901 |                                      | 2.58E-05    | 0.555475518 |
| cg04140663 | CPEB1                                | 8.60E-06    | 0.555454438 |
| cg11528849 | NEUROD1                              | 2.08E-05    | 0.555450656 |
| cg27109129 | CXCL5                                | 1.96E-05    | 0.555243428 |
| cg06060191 | LPPR4;LPPR4                          | 8.60E-06    | 0.555193227 |
| cg07124520 | LRIG3;LRIG3                          | 8.60E-06    | 0.555185833 |
| cg11668923 | ADAM12;ADAM12;ADAM12;ADAM12          | 1.18E-05    | 0.555080231 |
| cg26841013 | WNT3A                                | 2.58E-05    | 0.555061462 |
| cg25950325 |                                      | 1.11E-05    | 0.554969251 |
| cg12392473 | KCNB1                                | 4.34E-05    | 0.55480254  |
| cg23405575 | SLC6A1                               | 7.23E-05    | 0.554790083 |
| cg15471953 | SULT4A1                              | 1.96E-05    | 0.55471842  |
| cg17900854 | C21orf88;C21orf88                    | 9.04E-05    | 0.5546284   |
| cg08288406 | PLK5P                                | 1.96E-05    | 0.554624834 |
| cg22620090 |                                      | 8.60E-06    | 0.554621481 |
| cg08049853 |                                      | 8.60E-06    | 0.55461073  |
| cg05807991 | TRAM1L1                              | 1.50E-05    | 0.554571616 |
| cg26422458 | ELTD1;ELTD1                          | 8.60E-06    | 0.554437791 |
| cg25488669 | PAK7;PAK7                            | 8.60E-06    | 0.554332305 |
| cg02432280 |                                      | 1.50E-05    | 0.554227403 |
| cg25638997 | SOX9                                 | 0.000148457 | 0.554224977 |
| cg01431972 | C10orf41;C10orf41                    | 4.34E-05    | 0.554169881 |
| cg05063999 |                                      | 1.11E-05    | 0.554158697 |

|            |                                 |             |             |
|------------|---------------------------------|-------------|-------------|
| cg19523082 | ARMC3                           | 2.58E-05    | 0.554066761 |
| cg16620382 | TTBK1                           | 0.000187194 | 0.554047676 |
| cg07759394 | GLB1L2;GLB1L2                   | 4.34E-05    | 0.554012019 |
| cg17269633 | C17orf104                       | 8.60E-06    | 0.553988962 |
| cg22741823 | SGMS2                           | 9.24E-05    | 0.55395329  |
| cg04711852 | PAX9                            | 3.21E-05    | 0.553925728 |
| cg24896649 | ZFP42                           | 4.34E-05    | 0.553837559 |
| cg17264670 | RGS17                           | 1.96E-05    | 0.553836556 |
| cg25691167 | FERD3L                          | 1.96E-05    | 0.553822779 |
| cg22546374 |                                 | 1.11E-05    | 0.553781419 |
| cg06401021 | HMGCLL1;HMGCLL1;HMGCLL1;HMGCLL1 | 1.96E-05    | 0.553743249 |
| cg23290344 | NEFM;NEFM                       | 8.60E-06    | 0.55364901  |
| cg02773086 | HOXD3                           | 4.34E-05    | 0.553622516 |
| cg08854306 | FAM190A                         | 1.50E-05    | 0.553591723 |
| cg14007067 | SALL3                           | 8.60E-06    | 0.553453661 |
| cg25351606 |                                 | 8.60E-06    | 0.553421531 |
| cg21819468 | PDPN;PDPN;PDPN;PDPN             | 2.58E-05    | 0.553234007 |
| cg27664844 |                                 | 3.34E-05    | 0.553172328 |
| cg23495748 | CPLX2;CPLX2                     | 2.58E-05    | 0.553143812 |
| cg11430157 | SLC35F1;SLC35F1                 | 1.50E-05    | 0.553024327 |
| cg18582824 | CNTNAP5                         | 8.60E-06    | 0.552943576 |
| cg25496678 |                                 | 1.11E-05    | 0.552936469 |
| cg00221709 |                                 | 1.50E-05    | 0.552932956 |
| cg21884231 | SLC7A14;SLC7A14                 | 1.96E-05    | 0.552862615 |
| cg10182317 | CLVS2                           | 2.39E-05    | 0.552727914 |
| cg07585876 | ZFH4;ZFH4;LOC100192378          | 8.60E-06    | 0.552615958 |
| cg10165167 | SLIT3                           | 1.96E-05    | 0.552607987 |
| cg08797194 | UGGT2                           | 1.50E-05    | 0.552601759 |
| cg03532926 | DPP6                            | 8.60E-06    | 0.552588678 |
| cg02320740 | SORCS3                          | 1.11E-05    | 0.552568258 |
| cg25958283 | GNAL;GNAL;GNAL;GNAL             | 2.58E-05    | 0.552487555 |
| cg14583673 | FBXL7                           | 8.60E-06    | 0.552302473 |
| cg09935282 | VAX1;VAX1                       | 2.58E-05    | 0.551985028 |
| cg08430009 | GSC2                            | 8.60E-06    | 0.551979423 |
| cg21779611 | SALL3                           | 2.58E-05    | 0.551954789 |
| cg07495363 | BOLL;BOLL                       | 1.50E-05    | 0.551945431 |
| cg23042706 | NR2F2;NR2F2;NR2F2;MIR1469;NR2F2 | 8.60E-06    | 0.551943897 |
| cg27096779 | MEOX2                           | 4.34E-05    | 0.55193872  |
| cg10831607 |                                 | 8.60E-06    | 0.551881796 |
| cg21962423 |                                 | 8.60E-06    | 0.551823886 |
| cg19254119 | ZNF560                          | 4.34E-05    | 0.551818915 |
| cg08236767 | ST6GAL2;ST6GAL2;ST6GAL2         | 1.11E-05    | 0.551816924 |
| cg09167553 |                                 | 3.40E-05    | 0.551652006 |
| cg13646020 | PHOX2B                          | 8.60E-06    | 0.551641027 |
| cg08273957 |                                 | 0.000117986 | 0.551630037 |
| cg23075337 | NXPH1                           | 8.60E-06    | 0.551621327 |
| cg23751407 |                                 | 1.50E-05    | 0.55158894  |
| cg20585530 | SIX6                            | 8.60E-06    | 0.551393399 |
| cg22126211 | SLITRK3                         | 1.50E-05    | 0.551308212 |
| cg23089825 |                                 | 1.18E-05    | 0.551308102 |
| cg24727399 | QRFPR                           | 1.11E-05    | 0.551281758 |
| cg16846645 | FAM84A                          | 8.60E-06    | 0.551276384 |
| cg04188273 | COL25A1;COL25A1                 | 8.60E-06    | 0.551246779 |
| cg23712342 | PHYHIPL;PHYHIPL                 | 1.50E-05    | 0.551222796 |
| cg10317138 | ADAM12;ADAM12                   | 8.60E-06    | 0.551198422 |
| cg11760593 |                                 | 1.96E-05    | 0.551139871 |
| cg20114732 | T                               | 9.04E-05    | 0.551046038 |
| cg10111292 |                                 | 8.60E-06    | 0.551006167 |
| cg00740088 |                                 | 8.60E-06    | 0.551004786 |
| cg14006181 | C14orf23                        | 1.96E-05    | 0.550849006 |

|            |                                      |             |             |
|------------|--------------------------------------|-------------|-------------|
| cg10341154 | NPY5R                                | 1.50E-05    | 0.550817498 |
| cg20014049 | PTF1A                                | 1.96E-05    | 0.550811898 |
| cg05256793 | PRSS12                               | 1.11E-05    | 0.550753438 |
| cg13141009 | PEX5L                                | 8.60E-06    | 0.550438886 |
| cg18252903 |                                      | 1.11E-05    | 0.55043705  |
| cg21126583 | CNTNAP2                              | 3.34E-05    | 0.550425617 |
| cg02469909 | C22orf45;C22orf45;UPB1               | 8.60E-06    | 0.550411324 |
| cg27142536 |                                      | 8.60E-06    | 0.550326703 |
| cg18249634 | TRIM71                               | 2.58E-05    | 0.550284159 |
| cg11898486 | LYPD5;LYPD5                          | 1.96E-05    | 0.550223807 |
| cg25379026 | DNAH14;DNAH14;DNAH14;DNAH14;DNAH14;L | 8.60E-06    | 0.550208596 |
| cg16437728 | SYT9                                 | 1.96E-05    | 0.550092967 |
| cg18529845 | SRD5A2                               | 4.34E-05    | 0.550091127 |
| cg02253760 |                                      | 1.50E-05    | 0.549908967 |
| cg17160382 | GJA1                                 | 8.60E-06    | 0.549836555 |
| cg01529149 | FAM83H                               | 3.34E-05    | 0.549615419 |
| cg27202073 | SAMD5                                | 1.11E-05    | 0.549526089 |
| cg05836965 |                                      | 1.96E-05    | 0.549501789 |
| cg20214477 | TLL1                                 | 1.50E-05    | 0.549492645 |
| cg23011597 | KCNH8;KCNH8                          | 1.50E-05    | 0.549449143 |
| cg20844851 | VGLL2;VGLL2                          | 1.50E-05    | 0.549446193 |
| cg22749589 |                                      | 2.58E-05    | 0.54934566  |
| cg17760405 |                                      | 5.59E-05    | 0.549339794 |
| cg21026257 | PHACTR2;PHACTR2;PHACTR2;PHACTR2      | 0.000117986 | 0.549337846 |
| cg14743594 | FBLL1                                | 1.96E-05    | 0.54933499  |
| cg14582400 |                                      | 8.60E-06    | 0.549291145 |
| cg22367191 |                                      | 1.11E-05    | 0.549267715 |
| cg07451080 |                                      | 1.96E-05    | 0.549219551 |
| cg07508229 | TBC1D12;TBC1D12                      | 8.60E-06    | 0.549143364 |
| cg00506811 | SH3BP4                               | 0.000290372 | 0.549078823 |
| cg23881278 | DRD2;DRD2                            | 1.11E-05    | 0.549018577 |
| cg19701540 | NKX6-2                               | 8.60E-06    | 0.549017975 |
| cg05884032 | SALL3                                | 8.60E-06    | 0.548986722 |
| cg13434411 |                                      | 8.60E-06    | 0.548902887 |
| cg14005139 | NKX2-1;NKX2-1                        | 8.60E-06    | 0.548798031 |
| cg04025150 | C1orf94;C1orf94;C1orf94              | 8.60E-06    | 0.548775084 |
| cg12698487 | LRRC49;THAP10;THAP10                 | 8.60E-06    | 0.548615962 |
| cg20755651 | SMOC2;SMOC2                          | 3.34E-05    | 0.54859686  |
| cg17288142 | PCDHB4                               | 1.11E-05    | 0.548570424 |
| cg09469554 | CLDN10;CLDN10;CLDN10                 | 1.50E-05    | 0.548452447 |
| cg04945216 |                                      | 0.000357885 | 0.548451834 |
| cg02392553 |                                      | 2.58E-05    | 0.548282833 |
| cg03958798 | SORCS3                               | 8.60E-06    | 0.548272344 |
| cg19271111 |                                      | 2.58E-05    | 0.548146066 |
| cg12662072 | FAM159B                              | 1.50E-05    | 0.548128334 |
| cg00963169 | ELAVL4                               | 8.60E-06    | 0.547925066 |
| cg17385936 | TMEM108;TMEM108                      | 1.50E-05    | 0.547841531 |
| cg06323837 | C10orf35                             | 1.96E-05    | 0.547825436 |
| cg23420260 | HOXD1                                | 8.60E-06    | 0.547807129 |
| cg09868336 | FAM19A4;FAM19A4                      | 1.50E-05    | 0.54772243  |
| cg01307130 |                                      | 5.59E-05    | 0.547553001 |
| cg09839635 | RNF180;RNF180                        | 4.34E-05    | 0.547488241 |
| cg00699945 | NKX6-2                               | 8.60E-06    | 0.547435377 |
| cg15067806 |                                      | 1.96E-05    | 0.547399552 |
| cg07849944 | A2BP1;A2BP1                          | 8.60E-06    | 0.547283954 |
| cg11833861 | TMEM98;TMEM98                        | 1.50E-05    | 0.547229344 |
| cg14817655 | ZFP42                                | 5.59E-05    | 0.547133329 |
| cg02774186 | CCBE1;CCBE1                          | 1.50E-05    | 0.547032298 |
| cg01667837 | GPR37;GPR37                          | 8.60E-06    | 0.546931062 |
| cg03713642 | HS3ST2                               | 8.60E-06    | 0.546751013 |

|            |                                         |             |             |
|------------|-----------------------------------------|-------------|-------------|
| cg24034005 |                                         | 2.58E-05    | 0.546702767 |
| cg05655915 | NARF;NARF;NARF;NARF                     | 1.11E-05    | 0.546687162 |
| cg23291305 | SLC25A21;SLC25A21;SLC25A21;LOC10012979  | 8.60E-06    | 0.546629131 |
| cg11855526 | MPPED2                                  | 0.000570759 | 0.546588463 |
| cg12974388 |                                         | 1.50E-05    | 0.546558767 |
| cg06495961 | DPP6;DPP6                               | 1.11E-05    | 0.546421995 |
| cg19792599 | DDX25;PUS3;DDX25                        | 4.90E-05    | 0.546398426 |
| cg27018380 | CHGA                                    | 1.11E-05    | 0.546385376 |
| cg26369667 | YAP1;YAP1                               | 3.92E-05    | 0.546327883 |
| cg08120263 | FOXG1                                   | 1.11E-05    | 0.546224487 |
| cg06781712 | CDH18;CDH18;CDH18;CDH18                 | 1.50E-05    | 0.546186009 |
| cg22396555 |                                         | 1.11E-05    | 0.546168122 |
| cg13198321 | ALDH1A2;ALDH1A2;ALDH1A2;ALDH1A2         | 1.96E-05    | 0.546141129 |
| cg20914464 | NOL4                                    | 2.58E-05    | 0.546084285 |
| cg08448665 | C21orf88;C21orf88                       | 4.34E-05    | 0.546042178 |
| cg22889163 |                                         | 4.34E-05    | 0.54602894  |
| cg17349389 | CTNNA2;LRRTM1;CTNNA2                    | 8.60E-06    | 0.546010726 |
| cg18197377 |                                         | 1.11E-05    | 0.545990145 |
| cg10853637 | FOXQ1                                   | 1.11E-05    | 0.545957407 |
| cg00865356 | FAM190A                                 | 1.96E-05    | 0.545880677 |
| cg22524061 | OSR2;OSR2                               | 7.23E-05    | 0.545833264 |
| cg07349208 |                                         | 1.50E-05    | 0.545803511 |
| cg08117309 |                                         | 4.34E-05    | 0.545775485 |
| cg11410023 | EPHA6                                   | 1.96E-05    | 0.545733745 |
| cg07603330 |                                         | 2.58E-05    | 0.545566186 |
| cg19156483 | FIGN                                    | 0.000148457 | 0.54530814  |
| cg25039722 | CA10;CA10;CA10                          | 1.11E-05    | 0.545146241 |
| cg16278512 | VWDE;VWDE                               | 1.60E-05    | 0.54513472  |
| cg24605553 | ATP8A2                                  | 5.59E-05    | 0.545119791 |
| cg15552843 | C22orf45;C22orf45;UPB1                  | 8.60E-06    | 0.545112055 |
| cg17911318 | GALR1                                   | 8.60E-06    | 0.545112029 |
| cg27549952 | KITLG;KITLG                             | 8.60E-06    | 0.545050155 |
| cg08368617 |                                         | 1.11E-05    | 0.545046572 |
| cg05602862 | FAM84A                                  | 2.58E-05    | 0.545026806 |
| cg00765312 | ALX1                                    | 2.58E-05    | 0.544938766 |
| cg24021956 | MAGI2                                   | 8.60E-06    | 0.544875619 |
| cg21938261 | PPP2R2B;PPP2R2B;PPP2R2B;PPP2R2B;PPP2R2B | 2.39E-05    | 0.544865208 |
| cg22889573 | KY                                      | 1.11E-05    | 0.544764328 |
| cg16116512 | SNX7;SNX7;SNX7;SNX7                     | 8.60E-06    | 0.544734841 |
| cg18384778 |                                         | 2.58E-05    | 0.544640266 |
| cg20346912 | BRUNOL4;BRUNOL4;BRUNOL4;BRUNOL4         | 4.34E-05    | 0.544587361 |
| cg26446499 |                                         | 4.34E-05    | 0.544528002 |
| cg18034737 | ZFP42                                   | 3.34E-05    | 0.544525808 |
| cg07907386 | PHOX2B                                  | 3.34E-05    | 0.544518521 |
| cg14486338 | KCNS2                                   | 1.11E-05    | 0.544438203 |
| cg09473510 | MTNR1A                                  | 1.18E-05    | 0.54443175  |
| cg24399830 | FREM2                                   | 1.11E-05    | 0.544351796 |
| cg12398645 |                                         | 2.58E-05    | 0.544233598 |
| cg24033330 | MAFB                                    | 2.58E-05    | 0.544180553 |
| cg02523640 | FOXI2                                   | 1.11E-05    | 0.544159423 |
| cg07837556 | TRAM1L1                                 | 8.60E-06    | 0.544151393 |
| cg22489498 | PROX1                                   | 1.11E-05    | 0.544140001 |
| cg06087185 |                                         | 1.50E-05    | 0.543975045 |
| cg12821804 | KCNQ1DN                                 | 8.60E-06    | 0.543956399 |
| cg27120816 | CDH8                                    | 8.60E-06    | 0.543901889 |
| cg04061117 | LHFPL4                                  | 8.60E-06    | 0.543783366 |
| cg05255522 | TFAP2D                                  | 2.58E-05    | 0.543769422 |
| cg14909730 | TFAP2A;TFAP2A                           | 0.000117986 | 0.543750001 |
| cg02828023 | ST6GAL2;ST6GAL2;ST6GAL2                 | 8.60E-06    | 0.543737786 |
| cg16963144 | FOXA2                                   | 0.000117986 | 0.543567391 |

|            |                                     |             |             |
|------------|-------------------------------------|-------------|-------------|
| cg05034702 | PCDH20                              | 4.34E-05    | 0.543440394 |
| cg18429863 | KCNB2;KCNB2                         | 3.34E-05    | 0.543346486 |
| cg21635870 | GRIK2;GRIK2;GRIK2;GRIK2;GRIK2;GRIK2 | 1.96E-05    | 0.543270277 |
| cg13368756 | CTNND2                              | 1.96E-05    | 0.543169313 |
| cg25124241 | FEZF1;FEZF1                         | 3.34E-05    | 0.543162372 |
| cg21245277 | ZNF804A;ZNF804A                     | 8.60E-06    | 0.543023049 |
| cg21563597 | SEPT10;ANKRD57;SEPT10               | 1.96E-05    | 0.542990123 |
| cg27553667 | GABRG3                              | 1.96E-05    | 0.542990063 |
| cg03731268 | L1TD1;L1TD1                         | 1.50E-05    | 0.542914944 |
| cg05849857 | FREM2;FREM2                         | 1.50E-05    | 0.54285665  |
| cg11642106 |                                     | 1.96E-05    | 0.542801815 |
| cg14326196 | KIF12                               | 5.59E-05    | 0.542727647 |
| cg06177053 | DTD1;DTD1                           | 7.23E-05    | 0.542718474 |
| cg02027945 |                                     | 0.000334462 | 0.542694742 |
| cg00711088 |                                     | 8.60E-06    | 0.542679003 |
| cg12188986 | CCDC67;CCDC67                       | 8.60E-06    | 0.5426667   |
| cg04543008 | PHOX2A                              | 1.11E-05    | 0.542498675 |
| cg27006650 | FOXG1                               | 4.34E-05    | 0.542476045 |
| cg14394692 |                                     | 1.96E-05    | 0.542470659 |
| cg19512268 | GRM1;GRM1;GRM1;GRM1                 | 8.60E-06    | 0.542455253 |
| cg12523924 |                                     | 1.11E-05    | 0.542446817 |
| cg03709792 |                                     | 5.59E-05    | 0.542435189 |
| cg17721710 | SLC30A10                            | 0.000117986 | 0.542432038 |
| cg12566756 |                                     | 8.60E-06    | 0.542410729 |
| cg23889391 | ENPP5;ENPP5                         | 1.50E-05    | 0.542404985 |
| cg25246431 | PARVA                               | 1.11E-05    | 0.542380426 |
| cg22866015 | GPR39                               | 4.34E-05    | 0.54235695  |
| cg18705773 |                                     | 8.60E-06    | 0.542327429 |
| cg05733135 | BDNF;BDNF;BDNF;BDNF;BDNF            | 8.60E-06    | 0.542237744 |
| cg16718263 |                                     | 1.96E-05    | 0.542190291 |
| cg03190219 |                                     | 1.50E-05    | 0.542179643 |
| cg13685314 | DBC1                                | 8.60E-06    | 0.542120597 |
| cg00250500 |                                     | 1.18E-05    | 0.542100778 |
| cg05075118 | TMEM108;TMEM108                     | 1.11E-05    | 0.54194215  |
| cg26092471 | MSX2                                | 8.60E-06    | 0.541804666 |
| cg03161803 |                                     | 3.34E-05    | 0.541754454 |
| cg26987597 | FOXF2                               | 3.34E-05    | 0.541410587 |
| cg25570913 |                                     | 9.24E-05    | 0.541246457 |
| cg14230666 | ADAMTSL3;ADAMTSL3                   | 8.60E-06    | 0.541196412 |
| cg04397433 | MALL;MALL                           | 5.59E-05    | 0.541195067 |
| cg08572611 | ACTL6B                              | 8.60E-06    | 0.541173123 |
| cg19868631 | VSTM2A                              | 2.58E-05    | 0.541143697 |
| cg05385513 | EFEMP1;EFEMP1;EFEMP1                | 1.96E-05    | 0.541103037 |
| cg13954457 | FBLL1                               | 8.60E-06    | 0.541051125 |
| cg07225598 | HIST3H2A                            | 1.11E-05    | 0.540932168 |
| cg10002178 | PRIMA1                              | 0.000233422 | 0.540828144 |
| cg25527090 | VAX1;VAX1                           | 8.60E-06    | 0.540754888 |
| cg05652533 | DPYSL4                              | 8.60E-06    | 0.540729685 |
| cg23144681 |                                     | 1.18E-05    | 0.54069701  |
| cg24996482 |                                     | 1.50E-05    | 0.540695931 |
| cg22991512 |                                     | 4.34E-05    | 0.540693863 |
| cg04609245 | LIMCH1;LIMCH1;LIMCH1;LIMCH1;LIMCH1  | 4.34E-05    | 0.54053903  |
| cg21620246 |                                     | 1.96E-05    | 0.540528596 |
| cg10536999 | NFE2L3                              | 9.24E-05    | 0.54045194  |
| cg15921949 |                                     | 8.60E-06    | 0.540411143 |
| cg08130572 | FYN;FYN                             | 1.96E-05    | 0.540389243 |
| cg07571509 | CBLN1                               | 1.50E-05    | 0.540298624 |
| cg03171770 |                                     | 1.11E-05    | 0.540295134 |
| cg05099387 | HOXD1                               | 8.60E-06    | 0.540203656 |
| cg16183361 | NMNAT2                              | 4.34E-05    | 0.540113298 |



|            |                                      |             |             |
|------------|--------------------------------------|-------------|-------------|
| cg05809668 |                                      | 2.58E-05    | 0.54009034  |
| cg12892303 | C17orf104                            | 8.60E-06    | 0.540053131 |
| cg01188396 | NKX2-8                               | 1.96E-05    | 0.539937866 |
| cg05789704 | ADAM32                               | 8.60E-06    | 0.539875911 |
| cg12835048 | FGFR2;FGFR2;FGFR2;FGFR2;FGFR2;FGFR2; | 1.11E-05    | 0.539657135 |
| cg09441363 | KCNK2;KCNK2;KCNK2                    | 8.60E-06    | 0.539641211 |
| cg27510182 | DAB1                                 | 1.18E-05    | 0.539622293 |
| cg13101087 | GALNT13                              | 1.11E-05    | 0.539511524 |
| cg04837025 | NID1                                 | 7.23E-05    | 0.539480515 |
| cg00854242 | GALR1                                | 8.60E-06    | 0.539417976 |
| cg06545361 | FAM84A                               | 1.50E-05    | 0.539380142 |
| cg16065021 |                                      | 8.60E-06    | 0.539315748 |
| cg14250833 | GCM2                                 | 1.50E-05    | 0.539256866 |
| cg02458000 |                                      | 1.50E-05    | 0.539138455 |
| cg22796507 | FOXE3                                | 2.58E-05    | 0.539081701 |
| cg10595547 |                                      | 8.60E-06    | 0.539054167 |
| cg07352438 | EPB41L3                              | 9.24E-05    | 0.539010838 |
| cg03563308 | GRP;GRP;GRP                          | 2.58E-05    | 0.538951938 |
| cg19578835 |                                      | 4.34E-05    | 0.538934363 |
| cg23291886 |                                      | 1.11E-05    | 0.538893957 |
| cg08258526 | EFCAB1;EFCAB1;EFCAB1;EFCAB1;EFCAB1   | 1.50E-05    | 0.538737173 |
| cg05310764 |                                      | 1.96E-05    | 0.538735781 |
| cg27272679 |                                      | 4.34E-05    | 0.538697022 |
| cg01942962 | GRIA2;GRIA2;GRIA2                    | 8.60E-06    | 0.538483159 |
| cg12915892 | NCKAP5;NCKAP5                        | 1.11E-05    | 0.538293206 |
| cg20723355 | FBXO39                               | 4.34E-05    | 0.538170253 |
| cg26354128 | KIAA1409                             | 9.24E-05    | 0.538019825 |
| cg00017437 |                                      | 8.60E-06    | 0.537888043 |
| cg16376000 | FGF12;FGF12                          | 8.60E-06    | 0.537873374 |
| cg03745002 | TOX3;TOX3                            | 2.58E-05    | 0.537828309 |
| cg01384143 | C3orf14                              | 8.60E-06    | 0.537790797 |
| cg08364561 |                                      | 5.59E-05    | 0.53771417  |
| cg05142982 | C8orf42                              | 5.59E-05    | 0.537709238 |
| cg14944647 | MIR129-2                             | 8.60E-06    | 0.537691203 |
| cg25557432 | MACROD2                              | 0.000148457 | 0.537678524 |
| cg10788217 | TTC12                                | 5.59E-05    | 0.537499506 |
| cg06875227 | ISL1                                 | 1.50E-05    | 0.537486711 |
| cg03451670 | AGAP1;AGAP1                          | 0.000357885 | 0.537406497 |
| cg13914083 | GRIA2;GRIA2;GRIA2                    | 1.50E-05    | 0.537346555 |
| cg23952663 | LHX8                                 | 8.60E-06    | 0.537336321 |
| cg04738965 | ZIC1;ZIC1                            | 1.11E-05    | 0.537206842 |
| cg00530925 |                                      | 2.58E-05    | 0.537105637 |
| cg00907842 | FYB;FYB                              | 5.59E-05    | 0.537099456 |
| cg07204550 | KCNIP4                               | 8.60E-06    | 0.537072572 |
| cg06034933 | HIST3H2A;HIST3H2BB                   | 1.96E-05    | 0.536902006 |
| cg23021771 | TRPC4;TRPC4;TRPC4;TRPC4;TRPC4;TRPC4  | 8.60E-06    | 0.536896978 |
| cg25627226 |                                      | 4.34E-05    | 0.536855213 |
| cg16664405 |                                      | 1.50E-05    | 0.536845997 |
| cg23010538 | FAM5C                                | 0.000117986 | 0.536825439 |
| cg15504461 |                                      | 2.58E-05    | 0.536798681 |
| cg15916399 | DOK6;DOK6                            | 8.60E-06    | 0.536735811 |
| cg26708319 | PITX2;PITX2                          | 9.24E-05    | 0.536631268 |
| cg27252696 | SIM1                                 | 8.60E-06    | 0.536596127 |
| cg14698448 |                                      | 8.60E-06    | 0.536571372 |
| cg03216846 |                                      | 4.34E-05    | 0.536556867 |
| cg19807257 |                                      | 1.11E-05    | 0.536498308 |
| cg06001519 |                                      | 9.24E-05    | 0.536449646 |
| cg04549460 | RSPO2                                | 8.60E-06    | 0.536425104 |
| cg22282405 | TFAP2B                               | 1.50E-05    | 0.53641426  |
| cg09350341 | MMP2;MMP2                            | 5.59E-05    | 0.536353695 |

|            |                                      |             |             |
|------------|--------------------------------------|-------------|-------------|
| cg25918303 | GUCY1A2                              | 5.59E-05    | 0.536270796 |
| cg11268983 | PCDHA7;PCDHA13;PCDHA12;PCDHA6;PCDH   | 1.18E-05    | 0.536233278 |
| cg13690525 | GOLSYN;GOLSYN                        | 8.60E-06    | 0.536212078 |
| cg15092561 | C21orf33;C21orf33                    | 1.50E-05    | 0.536182346 |
| cg13205384 | ANO5;ANO5                            | 4.34E-05    | 0.536145726 |
| cg25500080 | PCDHAC2;PCDHAC2;PCDHA7;PCDHA12;PCD   | 4.34E-05    | 0.536049167 |
| cg16976370 | GABRA4                               | 1.50E-05    | 0.535959012 |
| cg27328797 |                                      | 8.60E-06    | 0.53585783  |
| cg20208633 |                                      | 3.34E-05    | 0.535778141 |
| cg06010588 | UNC5D                                | 2.08E-05    | 0.535761877 |
| cg17410236 | FLRT2;FLRT2                          | 8.60E-06    | 0.53571015  |
| cg00503383 |                                      | 1.11E-05    | 0.535637394 |
| cg24654264 | GULP1                                | 1.50E-05    | 0.535533912 |
| cg09500815 | NR2F2;NR2F2;NR2F2;NR2F2;MIR1469      | 8.60E-06    | 0.535442232 |
| cg20106459 | COX6B2;COX6B2                        | 2.58E-05    | 0.535429949 |
| cg05951860 | CTTNBP2                              | 8.60E-06    | 0.535389431 |
| cg13569486 |                                      | 9.04E-05    | 0.535378458 |
| cg27511169 | GOLSYN;GOLSYN                        | 8.60E-06    | 0.535224875 |
| cg10399099 |                                      | 2.58E-05    | 0.535190481 |
| cg06765217 |                                      | 5.11E-05    | 0.535154258 |
| cg07036370 | PKIB;PKIB;PKIB                       | 1.96E-05    | 0.535150795 |
| cg19675288 | T                                    | 2.58E-05    | 0.535112138 |
| cg13826890 | OTX2                                 | 8.60E-06    | 0.535061681 |
| cg15449956 | ZFPM2                                | 0.000148457 | 0.534876961 |
| cg16703956 | SLC6A3                               | 1.11E-05    | 0.534842776 |
| cg04818943 | LOC100130015;LOC100130015            | 0.000187194 | 0.534837335 |
| cg04864807 |                                      | 1.11E-05    | 0.534793223 |
| cg03278146 | LOC642597                            | 3.40E-05    | 0.534731634 |
| cg23919479 | MIPOL1;MIPOL1                        | 1.11E-05    | 0.53469515  |
| cg13065169 | PLOD2;PLOD2;PLOD2;PLOD2              | 8.60E-06    | 0.534689651 |
| cg05855618 | SEMA3E;SEMA3E                        | 1.50E-05    | 0.534667656 |
| cg04283162 | FAM189A1                             | 7.23E-05    | 0.534664913 |
| cg24183909 | TRAM1L1                              | 8.60E-06    | 0.534656541 |
| cg24488891 | LOC100128811;GPR158                  | 4.34E-05    | 0.534643964 |
| cg13678973 | ELAVL4                               | 1.11E-05    | 0.534628111 |
| cg09968630 | ANO5;ANO5                            | 0.000117986 | 0.534506652 |
| cg04148794 | SHC2                                 | 1.11E-05    | 0.534452477 |
| cg05697976 | FAR2                                 | 8.60E-06    | 0.534372133 |
| cg23045258 | COL4A3;COL4A4;COL4A3;COL4A4;COL4A3;C | 3.34E-05    | 0.534345346 |
| cg16269733 | BCAN;BCAN                            | 1.50E-05    | 0.534301343 |
| cg14157844 |                                      | 3.34E-05    | 0.534218172 |
| cg05732750 |                                      | 8.60E-06    | 0.534215384 |
| cg09805010 | THRB;THRB;THRB                       | 0.000187194 | 0.534136514 |
| cg09452082 |                                      | 1.50E-05    | 0.534115222 |
| cg12189551 | C14orf39                             | 8.60E-06    | 0.534089065 |
| cg03200166 | SYT7                                 | 8.60E-06    | 0.534086368 |
| cg10263682 | SOX2OT                               | 1.96E-05    | 0.534085465 |
| cg12421755 | ONECUT1                              | 1.50E-05    | 0.534072299 |
| cg13643914 | QRFPR                                | 3.34E-05    | 0.534055005 |
| cg17438030 |                                      | 1.96E-05    | 0.53404678  |
| cg16310415 | EBF2                                 | 1.11E-05    | 0.53390416  |
| cg10948359 | ME1;ME1                              | 5.59E-05    | 0.53387003  |
| cg04217778 | LOC389458                            | 8.60E-06    | 0.533800928 |
| cg24783211 |                                      | 7.23E-05    | 0.533761709 |
| cg18183163 | SP5                                  | 8.60E-06    | 0.533736221 |
| cg07565505 |                                      | 8.60E-06    | 0.533724612 |
| cg01408508 |                                      | 8.60E-06    | 0.533643782 |
| cg25645064 |                                      | 5.59E-05    | 0.533609877 |
| cg23807890 | WDR69;WDR69                          | 8.60E-06    | 0.5335534   |
| cg14875171 | NRXN1;NRXN1;NRXN1;NRXN1              | 3.34E-05    | 0.533519804 |

|            |                                           |             |             |
|------------|-------------------------------------------|-------------|-------------|
| cg24876960 | IRX4                                      | 1.11E-05    | 0.53347726  |
| cg24567424 | FAM155A                                   | 8.60E-06    | 0.53344381  |
| cg03184290 | PITX2;PITX2                               | 5.59E-05    | 0.533306946 |
| cg06424065 |                                           | 2.58E-05    | 0.533265344 |
| cg07183372 | SNX7;SNX7;SNX7;SNX7                       | 8.60E-06    | 0.533233283 |
| cg14317609 | PAX5                                      | 3.34E-05    | 0.533129032 |
| cg19760898 | TMEM229A                                  | 8.60E-06    | 0.533074763 |
| cg10040329 | RFX4                                      | 8.60E-06    | 0.532977305 |
| cg26515460 | RSPO4;RSPO4                               | 8.60E-06    | 0.532924579 |
| cg24966702 | DACT2                                     | 2.58E-05    | 0.532907274 |
| cg18239431 | EBF2                                      | 1.50E-05    | 0.532895291 |
| cg03867465 | MGC45800                                  | 0.000262362 | 0.532866728 |
| cg18116971 | BRUNOL5                                   | 8.60E-06    | 0.532767617 |
| cg22821947 |                                           | 8.60E-06    | 0.532721734 |
| cg15133719 | PAX3;PAX3;PAX3;CCDC140;PAX3;PAX3;PAX3     | 8.60E-06    | 0.5327107   |
| cg16933181 | CHST9                                     | 4.34E-05    | 0.532709298 |
| cg02189719 | ENTPD7                                    | 1.11E-05    | 0.53270269  |
| cg13952745 | GRID2                                     | 8.60E-06    | 0.532697758 |
| cg05197062 | GALNTL4                                   | 8.60E-06    | 0.532679756 |
| cg15118872 |                                           | 8.60E-06    | 0.532652598 |
| cg00046499 | GPR149                                    | 7.23E-05    | 0.532581865 |
| cg02010196 |                                           | 8.60E-06    | 0.532471914 |
| cg10106412 | ID4                                       | 0.000187194 | 0.532382217 |
| cg19864758 | PCSK2                                     | 8.60E-06    | 0.532326153 |
| cg25868998 |                                           | 3.34E-05    | 0.532286468 |
| cg07333191 |                                           | 1.50E-05    | 0.532270324 |
| cg08958294 | GRM1;GRM1                                 | 9.24E-05    | 0.532141218 |
| cg04710402 | RUNDC3B;RUNDC3B;ABCB1;RUNDC3B             | 1.50E-05    | 0.532006418 |
| cg04190870 | UGT8                                      | 5.59E-05    | 0.531991978 |
| cg06594404 |                                           | 2.58E-05    | 0.531986847 |
| cg05583608 |                                           | 3.34E-05    | 0.531940977 |
| cg27068490 | TTC12                                     | 5.59E-05    | 0.531926888 |
| cg26477488 | HAND1                                     | 4.34E-05    | 0.531697928 |
| cg17751435 |                                           | 5.59E-05    | 0.531681146 |
| cg12219082 | FAM19A4;FAM19A4                           | 8.60E-06    | 0.531676072 |
| cg24945701 |                                           | 8.60E-06    | 0.531620798 |
| cg03817667 | VSTM2A                                    | 3.34E-05    | 0.531614255 |
| cg17010394 | TTLL7                                     | 1.11E-05    | 0.531451893 |
| cg15602740 |                                           | 2.58E-05    | 0.531432104 |
| cg11439821 | CTXN2                                     | 2.08E-05    | 0.531405206 |
| cg16640855 | NEUROD1                                   | 2.58E-05    | 0.531353728 |
| cg03659519 | GALR1                                     | 1.11E-05    | 0.531276873 |
| cg05852231 | ACTC1                                     | 4.34E-05    | 0.531181633 |
| cg02646491 | KCNQ1DN                                   | 8.60E-06    | 0.531149722 |
| cg04319659 |                                           | 8.60E-06    | 0.531146986 |
| cg00943360 |                                           | 1.11E-05    | 0.531126749 |
| cg25192855 | IRF6                                      | 2.39E-05    | 0.53112662  |
| cg06183338 | COL23A1                                   | 9.24E-05    | 0.531126431 |
| cg12161228 | NOX4;NOX4;NOX4;NOX4;NOX4;NOX4             | 8.60E-06    | 0.531102694 |
| cg04336379 | LOC389458                                 | 4.34E-05    | 0.531098828 |
| cg19223299 | PRDM13                                    | 3.34E-05    | 0.531090101 |
| cg02595832 | FOXI2                                     | 1.11E-05    | 0.531053947 |
| cg26365545 | OTP                                       | 8.60E-06    | 0.531021728 |
| cg08453926 | WASF3                                     | 0.000117986 | 0.531013754 |
| cg21281009 | ANKRD30B;ANKRD30B                         | 0.003189589 | 0.530975712 |
| cg00768993 | FLJ32063                                  | 1.11E-05    | 0.530966958 |
| cg24914278 | TMEM74;TMEM74                             | 1.96E-05    | 0.530900234 |
| cg22770135 | TRPC7;TRPC7;TRPC7                         | 1.50E-05    | 0.530849193 |
| cg06577205 | FBXL7;FBXL7                               | 8.60E-06    | 0.530841691 |
| cg10092878 | MLXIPL;MLXIPL;MLXIPL;MLXIPL;MLXIPL;MLXIPL | 8.60E-06    | 0.530809781 |

|            |                                       |             |             |
|------------|---------------------------------------|-------------|-------------|
| cg24964368 | FPR2                                  | 0.000117986 | 0.530786038 |
| cg27348223 | SLC6A3                                | 8.60E-06    | 0.530764175 |
| cg02769705 | TMEM183B;TMEM183A                     | 4.34E-05    | 0.530756124 |
| cg03322161 |                                       | 2.58E-05    | 0.53074165  |
| cg03533519 |                                       | 4.34E-05    | 0.530734708 |
| cg10592245 | KCNK2;KCNK2;KCNK2                     | 1.60E-05    | 0.53072705  |
| cg23989821 | C14orf39                              | 3.34E-05    | 0.530669388 |
| cg11115235 |                                       | 8.60E-06    | 0.530650113 |
| cg11544692 | TMEM151A                              | 1.96E-05    | 0.530579605 |
| cg08065241 | ERC2                                  | 4.34E-05    | 0.530553362 |
| cg19288904 |                                       | 8.60E-06    | 0.530530064 |
| cg21760402 | TFAP2D                                | 8.60E-06    | 0.530492444 |
| cg23279522 |                                       | 2.58E-05    | 0.53047553  |
| cg00178249 | LOC100192378                          | 8.60E-06    | 0.530303223 |
| cg24891520 | OLFM2                                 | 8.60E-06    | 0.530278554 |
| cg19249107 | PCSK9                                 | 3.34E-05    | 0.530222354 |
| cg18614734 | NR2F2;NR2F2;NR2F2;MIR1469;NR2F2       | 5.59E-05    | 0.530203335 |
| cg03323696 | PDE4D;PDE4D                           | 0.000117986 | 0.530193579 |
| cg16364709 | ERN2                                  | 1.96E-05    | 0.530115538 |
| cg24563570 | PHYHIPL;PHYHIPL                       | 8.60E-06    | 0.529988323 |
| cg22305167 |                                       | 1.50E-05    | 0.529969841 |
| cg00151810 | BCAR1;BCAR1;BCAR1;BCAR1;BCAR1         | 8.60E-06    | 0.529787914 |
| cg22723056 | SYT9;SYT9                             | 1.11E-05    | 0.529707562 |
| cg13393978 | MAGI2                                 | 2.58E-05    | 0.529684403 |
| cg11338643 | T                                     | 1.11E-05    | 0.529664664 |
| cg23353952 | NEFH                                  | 8.60E-06    | 0.529622713 |
| cg13442960 | ELAVL2;ELAVL2;ELAVL2                  | 1.50E-05    | 0.529516387 |
| cg02305765 |                                       | 8.60E-06    | 0.529270913 |
| cg15711902 |                                       | 8.60E-06    | 0.529235464 |
| cg25789277 |                                       | 1.11E-05    | 0.529229871 |
| cg16703576 | RUNDC3B;RUNDC3B;RUNDC3B;ABCB1;RUNDC3B | 1.96E-05    | 0.529214346 |
| cg10477621 | FERD3L                                | 1.11E-05    | 0.529144695 |
| cg20388823 | GRID2                                 | 1.50E-05    | 0.529140685 |
| cg23302682 | T                                     | 1.50E-05    | 0.529073384 |
| cg23913679 | LAMA1                                 | 8.60E-06    | 0.528991589 |
| cg03226737 | SYT9                                  | 1.11E-05    | 0.528948024 |
| cg20593831 |                                       | 4.34E-05    | 0.528930274 |
| cg10992014 | GJA1                                  | 8.60E-06    | 0.528911924 |
| cg20527270 |                                       | 0.000117986 | 0.528903835 |
| cg09157727 | NR2F2;NR2F2                           | 8.60E-06    | 0.528751106 |
| cg14334441 |                                       | 1.50E-05    | 0.528727721 |
| cg18420965 | EPHA5;EPHA5                           | 1.96E-05    | 0.528701215 |
| cg10143811 | LMO3;LMO3                             | 8.60E-06    | 0.528688406 |
| cg00076538 | EGFLAM                                | 2.39E-05    | 0.528678633 |
| cg10821115 | ADAMTS19                              | 1.50E-05    | 0.528671352 |
| cg10601616 | SORCS3                                | 8.60E-06    | 0.52860023  |
| cg10349065 | WNT2;WNT2                             | 8.60E-06    | 0.528581764 |
| cg12145080 | SGPP2                                 | 1.50E-05    | 0.528565258 |
| cg20079899 | MSC                                   | 8.60E-06    | 0.528544179 |
| cg18392016 | VGLL2;VGLL2                           | 1.11E-05    | 0.528526037 |
| cg00150882 | AADAT;AADAT                           | 0.000117986 | 0.528390436 |
| cg24686610 | ZIC4;ZIC1                             | 0.000117986 | 0.528377848 |
| cg08110874 | DCLK1                                 | 1.96E-05    | 0.528289888 |
| cg14643892 | C12orf56;C12orf56                     | 8.60E-06    | 0.528174668 |
| cg14189141 |                                       | 8.60E-06    | 0.528085068 |
| cg26942829 | GFOD1                                 | 2.58E-05    | 0.528028707 |
| cg26014391 | PHYHIPL;PHYHIPL;PHYHIPL               | 8.60E-06    | 0.527946485 |
| cg06630204 | TMTC1;TMTC1                           | 8.60E-06    | 0.527930257 |
| cg06931815 | GPR85;GPR85;GPR85;GPR85               | 8.60E-06    | 0.527898695 |
| cg10741422 |                                       | 8.60E-06    | 0.527835295 |

|            |                                    |             |             |
|------------|------------------------------------|-------------|-------------|
| cg10410142 | GRIA2;GRIA2;GRIA2                  | 1.50E-05    | 0.5277103   |
| cg23440413 | PCDHAC2;PCDHAC2;PCDHA7;PCDHA12;PCD | 3.34E-05    | 0.52770222  |
| cg01718742 | CDH8                               | 1.50E-05    | 0.527700161 |
| cg21642176 | RAD51AP2                           | 1.11E-05    | 0.527624464 |
| cg20738500 | LOC254559                          | 1.96E-05    | 0.527624416 |
| cg19876814 | PCDHA7;PCDHA12;PCDHA6;PCDHA10;PCDH | 1.11E-05    | 0.527608763 |
| cg13002493 | KRT19                              | 2.58E-05    | 0.527557144 |
| cg03650342 | GPR158;LOC100128811                | 8.60E-06    | 0.527529003 |
| cg17747005 | PREX2;PREX2                        | 1.96E-05    | 0.527482533 |
| cg19129369 | LRAT;LRAT                          | 8.60E-06    | 0.527479904 |
| cg17579667 | LRR4C;LRR4C                        | 1.50E-05    | 0.5274356   |
| cg18780412 | PEX5L                              | 8.60E-06    | 0.527433991 |
| cg19079194 | ERBB4;ERBB4;ERBB4;ERBB4            | 1.18E-05    | 0.527358599 |
| cg21278102 | HSPBP1;HSPBP1                      | 4.34E-05    | 0.527295867 |
| cg13986130 | PTGS2                              | 8.60E-06    | 0.527201552 |
| cg22299454 | MARCH1                             | 1.11E-05    | 0.527201255 |
| cg19947104 | KCNC1;KCNC1                        | 1.11E-05    | 0.527138582 |
| cg04652097 | MAGI2                              | 1.96E-05    | 0.526946446 |
| cg05505803 | DZIP1;DZIP1                        | 1.11E-05    | 0.526852769 |
| cg19766441 | SLC34A2                            | 3.34E-05    | 0.526774984 |
| cg15084543 | ELTD1;ELTD1                        | 1.50E-05    | 0.52675526  |
| cg04402007 | UNC5D                              | 8.60E-06    | 0.52675334  |
| cg10982364 |                                    | 8.60E-06    | 0.526747387 |
| cg11438011 | HTR4;HTR4;HTR4;HTR4;HTR4;HTR4;HTR4 | 1.11E-05    | 0.52663413  |
| cg02554246 | ASTN2;ASTN2;ASTN2                  | 5.59E-05    | 0.526547279 |
| cg05994094 | C18orf34;C18orf34                  | 3.34E-05    | 0.526546791 |
| cg00714184 | LRAT                               | 8.60E-06    | 0.526542031 |
| cg07547549 | SLC12A5;SLC12A5                    | 8.60E-06    | 0.526521732 |
| cg07034362 | ALDH1L1                            | 2.58E-05    | 0.526479906 |
| cg11811513 | ZNF804A                            | 8.60E-06    | 0.526415714 |
| cg27094244 | SYT7                               | 8.60E-06    | 0.52640882  |
| cg25629773 | RFX6                               | 1.11E-05    | 0.526340793 |
| cg24035245 |                                    | 8.60E-06    | 0.526261268 |
| cg03225817 | GRIA4;GRIA4;GRIA4;GRIA4            | 0.000205664 | 0.526130733 |
| cg18789918 | SLITRK1;SLITRK1                    | 0.002450672 | 0.526014069 |
| cg17437939 | TAC1;TAC1;TAC1;TAC1                | 2.58E-05    | 0.525955487 |
| cg21649442 | SDR42E1                            | 1.96E-05    | 0.525892993 |
| cg00265634 | MAPK15                             | 1.11E-05    | 0.525766141 |
| cg07914084 | RYR2                               | 9.24E-05    | 0.525759951 |
| cg18577280 | EFHA2                              | 1.50E-05    | 0.525722322 |
| cg04703241 | SNX7;SNX7                          | 1.50E-05    | 0.525675537 |
| cg24590788 |                                    | 2.58E-05    | 0.525595851 |
| cg19098763 | ELAVL4                             | 4.34E-05    | 0.525569834 |
| cg05759718 | AGBL4;AGBL4                        | 1.96E-05    | 0.525564862 |
| cg00594560 | ZFH4;LOC100192378                  | 5.59E-05    | 0.525516157 |
| cg23049458 | L1TD1;L1TD1                        | 1.50E-05    | 0.525496734 |
| cg21242918 | VAX1;VAX1                          | 8.60E-06    | 0.525492564 |
| cg24880701 | LBXCOR1                            | 8.60E-06    | 0.525437036 |
| cg08706670 | KCNS2                              | 2.58E-05    | 0.525424406 |
| cg02332982 | DBX2                               | 8.60E-06    | 0.525391614 |
| cg12483476 | GRM6                               | 8.60E-06    | 0.525382204 |
| cg20449590 |                                    | 0.000117986 | 0.525342772 |
| cg18070676 | FLRT2                              | 4.34E-05    | 0.525296733 |
| cg22799141 |                                    | 1.11E-05    | 0.525278014 |
| cg18208707 | B4GALNT2;B4GALNT2;B4GALNT2         | 1.50E-05    | 0.525213887 |
| cg00839579 | MEOX2                              | 6.94E-05    | 0.525159774 |
| cg05295557 | NKX2-1;NKX2-1                      | 1.18E-05    | 0.525125516 |
| cg21453443 | HIST3H2A;HIST3H2BB                 | 1.50E-05    | 0.525094804 |
| cg19519964 | SGPP2                              | 1.96E-05    | 0.525074302 |
| cg11355215 | SNAP25;SNAP25                      | 3.92E-05    | 0.525048368 |

|            |                                 |             |             |
|------------|---------------------------------|-------------|-------------|
| cg25831075 | SLITRK3                         | 2.58E-05    | 0.525011575 |
| cg25311666 | MYH14;MYH14;MYH14               | 8.60E-06    | 0.524975611 |
| cg21241410 |                                 | 0.000117986 | 0.52496018  |
| cg27583307 | SATB2                           | 0.000357885 | 0.52489405  |
| cg20219381 | RGS22                           | 1.96E-05    | 0.524831197 |
| cg01510903 | KRT18;KRT18                     | 3.34E-05    | 0.524810946 |
| cg21179088 | VSTM2A                          | 8.60E-06    | 0.524731182 |
| cg17202313 | SOX2OT                          | 9.24E-05    | 0.524575452 |
| cg20755170 | POU4F3                          | 7.23E-05    | 0.524470183 |
| cg03506640 | FLRT2                           | 5.59E-05    | 0.524448848 |
| cg22855900 |                                 | 2.58E-05    | 0.524382237 |
| cg13441730 | PTPRD;PTPRD                     | 2.58E-05    | 0.524303861 |
| cg11702085 |                                 | 7.23E-05    | 0.524290608 |
| cg14859204 | SNX7;SNX7                       | 7.23E-05    | 0.52425865  |
| cg01939477 | MIR129-2                        | 1.96E-05    | 0.524256885 |
| cg14417099 | PCMT1                           | 3.34E-05    | 0.524227761 |
| cg11901043 |                                 | 8.60E-06    | 0.524219211 |
| cg07161172 | LRRC49;THAP10                   | 1.11E-05    | 0.524201465 |
| cg25678815 | ALX1                            | 1.96E-05    | 0.524122524 |
| cg17199247 | LRRN1                           | 5.59E-05    | 0.524118477 |
| cg17800654 | DMRTA2                          | 8.60E-06    | 0.52410976  |
| cg02143877 | CYP24A1;CYP24A1;CYP24A1;CYP24A1 | 4.34E-05    | 0.524091097 |
| cg22531183 | FLJ26850                        | 8.60E-06    | 0.524020515 |
| cg09599062 |                                 | 9.24E-05    | 0.523806992 |
| cg10789050 | OSBPL10                         | 4.34E-05    | 0.523786275 |
| cg18745566 |                                 | 1.11E-05    | 0.523756026 |
| cg04559779 | MIR124-2                        | 8.60E-06    | 0.523684177 |
| cg21355828 |                                 | 8.60E-06    | 0.523680575 |
| cg22488256 | PDE4B;PDE4B                     | 8.60E-06    | 0.523640026 |
| cg14507868 | ST6GAL2;ST6GAL2;ST6GAL2         | 1.11E-05    | 0.523574189 |
| cg02983424 |                                 | 8.60E-06    | 0.523495318 |
| cg00987080 | ZBTB8B                          | 8.60E-06    | 0.523462007 |
| cg24779941 | CDC42BPB                        | 2.58E-05    | 0.523405872 |
| cg03905847 | NKX6-2                          | 8.60E-06    | 0.523359495 |
| cg27211284 |                                 | 7.23E-05    | 0.523357217 |
| cg13554207 | LPAR3                           | 1.96E-05    | 0.52334856  |
| cg24011073 | LPIN1                           | 4.34E-05    | 0.523305613 |
| cg22533517 |                                 | 1.11E-05    | 0.523284313 |
| cg12656475 | STEAP2;STEAP2;STEAP2;STEAP2     | 5.59E-05    | 0.523250973 |
| cg18303215 | ABCG5                           | 1.18E-05    | 0.523221243 |
| cg17641861 |                                 | 2.58E-05    | 0.523218668 |
| cg02164046 | SST;SST                         | 1.50E-05    | 0.523200686 |
| cg25950235 | MIR9-3                          | 2.58E-05    | 0.522975394 |
| cg07382554 | SALL3                           | 1.11E-05    | 0.522950826 |
| cg23191956 | FOXC1                           | 1.11E-05    | 0.522948893 |
| cg03467725 | C16orf73;C16orf73               | 2.58E-05    | 0.522872115 |
| cg15617814 | NTM;NTM;NTM;NTM                 | 4.34E-05    | 0.522865115 |
| cg01566526 | ALDH1L1;ALDH1L1                 | 1.50E-05    | 0.522659266 |
| cg01837657 | RHCG                            | 1.96E-05    | 0.522640887 |
| cg04478251 | ABR;ABR;ABR                     | 1.50E-05    | 0.522615947 |
| cg26068551 | PRKAA2                          | 7.23E-05    | 0.522600362 |
| cg17855264 |                                 | 1.50E-05    | 0.522579389 |
| cg04224064 |                                 | 1.50E-05    | 0.522504484 |
| cg17152484 | GPR37                           | 8.60E-06    | 0.522422889 |
| cg07136998 | SLIT3;SLIT3                     | 4.34E-05    | 0.522408354 |
| cg14591786 | RNF180;RNF180                   | 1.11E-05    | 0.52240319  |
| cg21834207 | AGBL4                           | 1.11E-05    | 0.522339089 |
| cg23867718 | SASH1                           | 8.60E-06    | 0.522313056 |
| cg05884394 | DPY19L2P4                       | 3.34E-05    | 0.522220685 |
| cg24306585 | PCSK2                           | 0.000187194 | 0.522214637 |

|            |                                 |             |             |
|------------|---------------------------------|-------------|-------------|
| cg25851789 | ESRRG                           | 8.60E-06    | 0.522195156 |
| cg02650266 |                                 | 8.60E-06    | 0.522188578 |
| cg20168806 |                                 | 1.96E-05    | 0.522156689 |
| cg03465206 | CPE                             | 1.96E-05    | 0.522138643 |
| cg01718116 | DPP10;DPP10                     | 2.58E-05    | 0.522135991 |
| cg05571581 |                                 | 1.96E-05    | 0.521982114 |
| cg24851854 | TACSTD2                         | 8.60E-06    | 0.521974672 |
| cg18898125 | NEFM                            | 8.60E-06    | 0.521868534 |
| cg15818307 |                                 | 1.18E-05    | 0.521826325 |
| cg12105941 |                                 | 2.58E-05    | 0.521799399 |
| cg07077665 |                                 | 1.50E-05    | 0.521769495 |
| cg13453904 |                                 | 9.24E-05    | 0.521742561 |
| cg26635219 | CFTR                            | 5.59E-05    | 0.521739524 |
| cg12926938 |                                 | 8.60E-06    | 0.521728939 |
| cg14631386 |                                 | 1.18E-05    | 0.521640569 |
| cg02970836 |                                 | 2.58E-05    | 0.521468628 |
| cg02164615 |                                 | 9.24E-05    | 0.521442201 |
| cg01898661 | LOC100130015;LOC100130015       | 2.58E-05    | 0.521369896 |
| cg01614102 |                                 | 1.11E-05    | 0.521344629 |
| cg10282162 | SHISA6                          | 0.000117986 | 0.521339269 |
| cg12166610 | NRG1                            | 1.96E-05    | 0.521291141 |
| cg23998645 | DPY19L2P4                       | 1.11E-05    | 0.521277395 |
| cg21484749 | BRUNOL4;BRUNOL4;BRUNOL4;BRUNOL4 | 8.60E-06    | 0.521220192 |
| cg01283246 | FBXL21;FBXL21                   | 3.34E-05    | 0.521206901 |
| cg02072400 |                                 | 1.50E-05    | 0.521141681 |
| cg02163885 |                                 | 0.000357885 | 0.521131604 |
| cg19046725 | LEPREL1;LEPREL1                 | 1.50E-05    | 0.521121345 |
| cg07850527 |                                 | 5.59E-05    | 0.52111682  |
| cg23057648 | C21orf88;C21orf88               | 3.34E-05    | 0.521115031 |
| cg08086724 | SFTA3                           | 2.58E-05    | 0.521090564 |
| cg16549308 | NID1                            | 9.24E-05    | 0.52103931  |
| cg26682094 | AGBL4                           | 1.11E-05    | 0.521037306 |
| cg18290848 |                                 | 1.50E-05    | 0.521033287 |
| cg14442421 | SLC24A2                         | 8.60E-06    | 0.52103078  |
| cg18343437 |                                 | 1.11E-05    | 0.520980195 |
| cg02937674 | LOC440040                       | 8.60E-06    | 0.520941956 |
| cg11163620 | GLRB;GLRB;GLRB;GLRB             | 1.50E-05    | 0.520910015 |
| cg03045425 | NOL4                            | 1.96E-05    | 0.520878217 |
| cg00544449 | KIAA1024                        | 4.34E-05    | 0.520870126 |
| cg24847685 |                                 | 4.34E-05    | 0.520836987 |
| cg11769456 | SNED1                           | 5.59E-05    | 0.520803454 |
| cg15259986 | FIGN                            | 1.96E-05    | 0.520755389 |
| cg11648968 | DDAH1;DDAH1                     | 3.34E-05    | 0.520741924 |
| cg09826050 | ESRRG                           | 3.34E-05    | 0.520728868 |
| cg14200170 | ADCYAP1;ADCYAP1                 | 1.50E-05    | 0.520705068 |
| cg09734791 | MSC                             | 1.50E-05    | 0.520694645 |
| cg27504802 | TRIM67                          | 1.11E-05    | 0.520674895 |
| cg25576011 | FOXI2                           | 1.50E-05    | 0.520622608 |
| cg03357798 |                                 | 8.60E-06    | 0.520621439 |
| cg15416735 |                                 | 7.23E-05    | 0.520559282 |
| cg25657713 |                                 | 1.11E-05    | 0.520559074 |
| cg08490115 | KCNA4                           | 4.34E-05    | 0.520554    |
| cg15654121 | CSMD2                           | 3.34E-05    | 0.520551593 |
| cg05041351 | C16orf73;C16orf73;C16orf73      | 8.60E-06    | 0.520453723 |
| cg07813142 | SP5                             | 4.34E-05    | 0.520359189 |
| cg26296488 | DRD5                            | 0.002714607 | 0.520298274 |
| cg10471574 | SOX9                            | 1.96E-05    | 0.520251001 |
| cg10894483 | SULT4A1                         | 8.60E-06    | 0.520230927 |
| cg00344443 |                                 | 2.58E-05    | 0.520219155 |
| cg18442362 | OGDH;OGDH;OGDH                  | 7.23E-05    | 0.520100063 |

|            |                                                 |             |             |
|------------|-------------------------------------------------|-------------|-------------|
| cg13122377 |                                                 | 8.60E-06    | 0.520073742 |
| cg25140190 | C18orf1;C18orf1;C18orf1;C18orf1;C18orf1;C18orf1 | 1.96E-05    | 0.52007073  |
| cg02149189 |                                                 | 1.50E-05    | 0.520069672 |
| cg03730958 | FOXQ1                                           | 8.60E-06    | 0.51999554  |
| cg07016184 |                                                 | 5.59E-05    | 0.519983917 |
| cg10135483 | HTR1E;HTR1E                                     | 5.59E-05    | 0.519975516 |
| cg00275741 | PCDHA7;PCDHA12;PCDHA6;PCDHA10;PCDHA11           | 1.11E-05    | 0.519961167 |
| cg12633154 | RNF39;RNF39                                     | 9.24E-05    | 0.519935254 |
| cg24981833 | FOXG1                                           | 1.18E-05    | 0.51989788  |
| cg01710865 | SPATA6                                          | 0.000233422 | 0.519771034 |
| cg14537713 |                                                 | 1.50E-05    | 0.519747553 |
| cg11546137 | HOXD11                                          | 8.60E-06    | 0.519435006 |
| cg08768569 | SORCS3                                          | 5.59E-05    | 0.519409612 |
| cg09491410 |                                                 | 8.60E-06    | 0.519407352 |
| cg18249173 | TBX20;TBX20;TBX20;TBX20                         | 1.11E-05    | 0.519375338 |
| cg04091563 | HTR4;HTR4;HTR4;HTR4;HTR4;HTR4;HTR4              | 7.23E-05    | 0.519337994 |
| cg03243226 | GRIA4;GRIA4;GRIA4;GRIA4;GRIA4;GRIA4;GRIA4       | 4.34E-05    | 0.519308991 |
| cg27510832 |                                                 | 1.11E-05    | 0.519305163 |
| cg18554789 | HIPK2;HIPK2                                     | 1.96E-05    | 0.519228884 |
| cg14638272 | GULP1                                           | 8.60E-06    | 0.519203866 |
| cg03671700 | CDH8                                            | 8.60E-06    | 0.519141374 |
| cg14409559 | MSC                                             | 1.50E-05    | 0.51910387  |
| cg06240450 | ALDH1L1                                         | 3.34E-05    | 0.519037422 |
| cg15786180 | CACNG8                                          | 1.50E-05    | 0.518898435 |
| cg11021744 | SLC6A1                                          | 1.96E-05    | 0.51879422  |
| cg12412079 | FAM19A4;FAM19A4                                 | 1.50E-05    | 0.518788874 |
| cg17450733 | DBX2                                            | 8.60E-06    | 0.518783827 |
| cg03779241 | PHF21B;PHF21B                                   | 1.50E-05    | 0.518743455 |
| cg05016408 | LOC134466                                       | 9.24E-05    | 0.518696354 |
| cg25317585 | FGF14;FGF14                                     | 1.96E-05    | 0.518678591 |
| cg17037282 | ISL1                                            | 1.50E-05    | 0.518658395 |
| cg13401893 | RNF39;RNF39                                     | 0.000187194 | 0.518608867 |
| cg02403395 | FGF12                                           | 4.34E-05    | 0.518587596 |
| cg20804050 | EN1;EN1                                         | 2.58E-05    | 0.518567069 |
| cg24167118 | FREM2                                           | 8.60E-06    | 0.518534855 |
| cg18143243 | CACNA2D3                                        | 9.24E-05    | 0.518530524 |
| cg00152008 | DMRTA2                                          | 1.18E-05    | 0.518521179 |
| cg08613144 | LYPD1;LYPD1;LYPD1                               | 7.23E-05    | 0.518510977 |
| cg23248887 | SSTR1                                           | 0.000117986 | 0.518506122 |
| cg05051043 | SLC35F3;SLC35F3                                 | 2.58E-05    | 0.518479755 |
| cg02054792 | FHL2;FHL2;FHL2;FHL2                             | 1.11E-05    | 0.518475119 |
| cg08322102 | ZFH4;LOC100192378                               | 4.34E-05    | 0.518441846 |
| cg05897091 | SMOC2;SMOC2                                     | 1.96E-05    | 0.51838682  |
| cg26014036 | ZIC4;ZIC4;ZIC4                                  | 5.59E-05    | 0.518367695 |
| cg13670833 | KCNC3                                           | 1.96E-05    | 0.518320027 |
| cg23068913 |                                                 | 1.50E-05    | 0.518245077 |
| cg15316843 |                                                 | 1.96E-05    | 0.518150403 |
| cg05293738 | PREX2;PREX2                                     | 2.58E-05    | 0.518135042 |
| cg14834938 | ISL1                                            | 5.59E-05    | 0.518103755 |
| cg08249988 | NCAN;NCAN                                       | 1.96E-05    | 0.518047652 |
| cg19053239 | KIF5C                                           | 3.34E-05    | 0.517969377 |
| cg17869514 |                                                 | 1.11E-05    | 0.517899639 |
| cg10248492 |                                                 | 2.58E-05    | 0.517864037 |
| cg24766334 | SLC24A4;SLC24A4;SLC24A4                         | 0.000290372 | 0.517860474 |
| cg11797949 | DNAH9                                           | 8.60E-06    | 0.517850689 |
| cg14305278 |                                                 | 8.60E-06    | 0.517717262 |
| cg27628089 | MATN2;MATN2                                     | 7.23E-05    | 0.517651727 |
| cg01287975 | TAC1;TAC1;TAC1;TAC1                             | 1.50E-05    | 0.517635627 |
| cg25720804 | TLX3                                            | 8.60E-06    | 0.51760386  |
| cg23230830 | LOC646627                                       | 2.58E-05    | 0.517602119 |



|            |                                         |             |             |
|------------|-----------------------------------------|-------------|-------------|
| cg07211212 |                                         | 1.50E-05    | 0.517377949 |
| cg21895526 | CHST9                                   | 2.58E-05    | 0.51736012  |
| cg00463631 | GRIA2;GRIA2;GRIA2                       | 3.30E-05    | 0.517337835 |
| cg11108269 | NKX2-1;NKX2-1;NKX2-1                    | 8.60E-06    | 0.517246189 |
| cg02523844 | MAGI2                                   | 8.60E-06    | 0.517234573 |
| cg20034792 |                                         | 5.59E-05    | 0.517194532 |
| cg06339629 | AADAT;AADAT                             | 9.24E-05    | 0.517185171 |
| cg07870307 | PCDHGA4;PCDHGA2;PCDHGB2;PCDHGA5;PCDHGA6 | 4.34E-05    | 0.517167996 |
| cg14794076 |                                         | 4.34E-05    | 0.517148986 |
| cg04586579 | SDR42E1                                 | 1.11E-05    | 0.517127188 |
| cg24266670 |                                         | 1.50E-05    | 0.517025686 |
| cg08274234 | SEMA3E;SEMA3E                           | 8.60E-06    | 0.517003659 |
| cg03064592 | COL21A1                                 | 8.60E-06    | 0.516986307 |
| cg14454907 |                                         | 2.58E-05    | 0.516925754 |
| cg19504702 |                                         | 1.11E-05    | 0.516883474 |
| cg19725343 | IGLON5                                  | 2.58E-05    | 0.516843779 |
| cg08915603 | MTNR1A                                  | 1.11E-05    | 0.516779119 |
| cg10599900 | REM1                                    | 1.11E-05    | 0.516733419 |
| cg03839709 | HS6ST3                                  | 8.60E-06    | 0.516714995 |
| cg00948275 | HIST3H2BB;HIST3H2A                      | 3.34E-05    | 0.516697986 |
| cg07556134 | PPARG;PPARG;PPARG                       | 5.59E-05    | 0.516676066 |
| cg15379354 | LGI2                                    | 9.24E-05    | 0.516667932 |
| cg07120346 |                                         | 1.11E-05    | 0.516640253 |
| cg05471845 | CCK                                     | 3.34E-05    | 0.516534238 |
| cg08530237 |                                         | 8.60E-06    | 0.516518509 |
| cg13446474 |                                         | 3.34E-05    | 0.516475125 |
| cg00604209 | STK32A;STK32A;STK32A;STK32A             | 1.96E-05    | 0.516425647 |
| cg01202150 | PCDHA7;PCDHA12;PCDHA6;PCDHA10;PCDHA11   | 1.18E-05    | 0.516401581 |
| cg17138769 | VAX1                                    | 3.34E-05    | 0.516382751 |
| cg18271025 | DNAJC6                                  | 1.11E-05    | 0.516376834 |
| cg17364114 | SLC22A3                                 | 1.50E-05    | 0.516274678 |
| cg12757155 |                                         | 1.11E-05    | 0.516248473 |
| cg15160198 | CYP7B1                                  | 0.000148457 | 0.516241795 |
| cg05895353 |                                         | 7.23E-05    | 0.516221886 |
| cg17810176 | GAPDHS;TMEM147                          | 1.50E-05    | 0.516209799 |
| cg21678377 | DPP10;DPP10                             | 0.000117986 | 0.516177403 |
| cg11823511 | BARHL2                                  | 1.11E-05    | 0.516158135 |
| cg10443049 | NXPH1                                   | 1.50E-05    | 0.516096526 |
| cg01288372 | PTH2R                                   | 8.60E-06    | 0.515964521 |
| cg09083947 |                                         | 1.11E-05    | 0.515903608 |
| cg07515422 | SPTBN4                                  | 1.11E-05    | 0.515852966 |
| cg07811110 | SLC6A15;SLC6A15;SLC6A15                 | 3.34E-05    | 0.515811598 |
| cg22965511 | PDLIM3;PDLIM3                           | 1.11E-05    | 0.515717667 |
| cg00379648 | RFX4                                    | 5.59E-05    | 0.515693364 |
| cg23217126 | DOK6                                    | 8.60E-06    | 0.515679168 |
| cg08087868 |                                         | 8.60E-06    | 0.515648646 |
| cg18229521 | SLC24A4;SLC24A4;SLC24A4                 | 7.23E-05    | 0.515626359 |
| cg22635008 | OGDHL;OGDHL;OGDHL                       | 2.58E-05    | 0.515624054 |
| cg23267759 | GATA6                                   | 3.34E-05    | 0.51560867  |
| cg07336350 |                                         | 4.34E-05    | 0.515605479 |
| cg08165960 | CHSY1                                   | 2.58E-05    | 0.515558025 |
| cg01580888 | RHPN2                                   | 8.60E-06    | 0.515539258 |
| cg04100595 |                                         | 0.000148457 | 0.515521301 |
| cg12060713 | FEZF1;FEZF1                             | 8.60E-06    | 0.515474477 |
| cg19031658 | CXCL2;CXCL2                             | 0.000537905 | 0.515470005 |
| cg24540521 | THEM4                                   | 9.24E-05    | 0.515406202 |
| cg18945335 |                                         | 9.24E-05    | 0.515359489 |
| cg21718267 |                                         | 1.11E-05    | 0.51534293  |
| cg01303723 | NKX6-2                                  | 1.60E-05    | 0.515291841 |
| cg04138185 | ADAMTSL3                                | 3.34E-05    | 0.515227789 |

|            |                                      |             |             |
|------------|--------------------------------------|-------------|-------------|
| cg13458212 | PDLIM3;PDLIM3                        | 1.18E-05    | 0.515212823 |
| cg16733705 |                                      | 1.96E-05    | 0.515184407 |
| cg13131185 |                                      | 1.50E-05    | 0.515174461 |
| cg22368664 | P2RX2;P2RX2;P2RX2;P2RX2;P2RX2;P2RX2  | 1.11E-05    | 0.515095304 |
| cg23489883 | TMEM171;TMEM171                      | 1.96E-05    | 0.51509504  |
| cg00266983 |                                      | 0.000148457 | 0.515086321 |
| cg27351358 | BDNF;BDNF;BDNF;BDNF;BDNF             | 1.50E-05    | 0.515029655 |
| cg22457984 | PAK7;PAK7                            | 3.34E-05    | 0.514996095 |
| cg11538641 | SIM1                                 | 2.58E-05    | 0.514963433 |
| cg24087887 | FREM2;FREM2                          | 8.60E-06    | 0.514943722 |
| cg08315202 | NPTX2                                | 4.34E-05    | 0.514925522 |
| cg15412759 | TFAP2D                               | 2.58E-05    | 0.514915577 |
| cg03264601 |                                      | 0.000117986 | 0.514882371 |
| cg04733537 | TMEM132D                             | 8.60E-06    | 0.514847204 |
| cg18501029 |                                      | 3.34E-05    | 0.514842948 |
| cg17162024 | FAM150A                              | 1.11E-05    | 0.514819657 |
| cg01610632 | ZIC1;ZIC1                            | 1.50E-05    | 0.514699861 |
| cg15931721 | C1QL2                                | 2.39E-05    | 0.514695324 |
| cg07087293 | SCNN1B                               | 0.000117986 | 0.514573955 |
| cg10485664 | FEZF1;FEZF1                          | 1.96E-05    | 0.514565312 |
| cg19854376 | INTU                                 | 1.50E-05    | 0.514498914 |
| cg22504204 | PCSK2                                | 4.34E-05    | 0.514484925 |
| cg18854419 |                                      | 2.58E-05    | 0.514417622 |
| cg23244289 | THBS4                                | 2.58E-05    | 0.514393112 |
| cg24531494 | C4orf31                              | 3.34E-05    | 0.514366581 |
| cg01142635 |                                      | 8.60E-06    | 0.514319738 |
| cg17119521 | LIN28B                               | 8.60E-06    | 0.514306875 |
| cg19704805 | LMO3;LMO3                            | 1.18E-05    | 0.514200848 |
| cg16348470 | C1orf94;C1orf94;C1orf94              | 1.11E-05    | 0.514189319 |
| cg02935627 | PPAP2C;PPAP2C;PPAP2C                 | 4.34E-05    | 0.514171653 |
| cg02801786 |                                      | 3.34E-05    | 0.514140157 |
| cg17677030 | NRXN1;NRXN1;NRXN1                    | 2.58E-05    | 0.514086847 |
| cg12597389 | NXPH1                                | 1.96E-05    | 0.514043227 |
| cg14209299 | ST6GAL2;ST6GAL2;ST6GAL2              | 8.60E-06    | 0.513993514 |
| cg21643086 |                                      | 4.34E-05    | 0.513953901 |
| cg01783070 | PAX1                                 | 1.11E-05    | 0.513940029 |
| cg19761272 |                                      | 1.11E-05    | 0.513907835 |
| cg09797337 |                                      | 1.11E-05    | 0.513876865 |
| cg07923233 |                                      | 0.000187194 | 0.513854579 |
| cg08900101 | TBX5;TBX5;TBX5;TBX5                  | 5.59E-05    | 0.513848998 |
| cg07295964 | CPLX2                                | 5.59E-05    | 0.513842516 |
| cg13912117 |                                      | 3.34E-05    | 0.513835423 |
| cg13478228 | CBLN2                                | 7.23E-05    | 0.513833428 |
| cg24158187 |                                      | 9.24E-05    | 0.513747779 |
| cg19822251 | LHFPL4;LHFPL4                        | 8.60E-06    | 0.513746656 |
| cg10826999 |                                      | 1.50E-05    | 0.513682384 |
| cg18233746 | MGST1;MGST1;MGST1                    | 8.60E-06    | 0.513587531 |
| cg16006349 | HOTAIR                               | 1.96E-05    | 0.513511783 |
| cg21229570 |                                      | 1.11E-05    | 0.513467565 |
| cg07733446 | GRID2                                | 3.21E-05    | 0.513411575 |
| cg10992267 | LPHN2                                | 0.000357885 | 0.513349021 |
| cg11382529 | LOC401463                            | 8.60E-06    | 0.513242868 |
| cg07302959 | FAM133B;FAM133B                      | 4.34E-05    | 0.513198093 |
| cg24809973 |                                      | 1.11E-05    | 0.513187669 |
| cg20661138 |                                      | 1.11E-05    | 0.512945115 |
| cg10553088 | CADM1;CADM1                          | 3.34E-05    | 0.512935544 |
| cg14348397 |                                      | 4.34E-05    | 0.512924916 |
| cg26132298 | C14orf39                             | 8.60E-06    | 0.51285594  |
| cg04453065 | CYR61;CYR61                          | 2.58E-05    | 0.512842751 |
| cg02057391 | TRPC4;TRPC4;TRPC4;TRPC4;TRPC4;TRPC4; | 8.60E-06    | 0.512840901 |

|            |                                 |             |             |
|------------|---------------------------------|-------------|-------------|
| cg14839351 | BRUNOL4;BRUNOL4;BRUNOL4;BRUNOL4 | 8.60E-06    | 0.512737387 |
| cg11312896 | ZSCAN1                          | 8.60E-06    | 0.512711112 |
| cg02305377 |                                 | 0.000122184 | 0.512689501 |
| cg12388309 | PAK7;PAK7                       | 3.30E-05    | 0.512658205 |
| cg13273396 | ACSS3;ACSS3                     | 8.60E-06    | 0.512644441 |
| cg19501982 |                                 | 8.60E-06    | 0.512628649 |
| cg06960784 | ESRRG;ESRRG;ESRRG;ESRRG;ESRRG   | 5.59E-05    | 0.512619012 |
| cg07301433 | CYP1B1                          | 0.000955793 | 0.512607307 |
| cg00966099 |                                 | 4.34E-05    | 0.512578282 |
| cg13591783 | ANXA1                           | 3.34E-05    | 0.512523656 |
| cg11327657 | C21orf70                        | 3.34E-05    | 0.512508553 |
| cg18411108 | ATXN7;ATXN7                     | 2.58E-05    | 0.512490384 |
| cg18750960 | HOXD4                           | 8.60E-06    | 0.512363056 |
| cg25316339 | ANKRD34B                        | 1.50E-05    | 0.512310235 |
| cg16572375 | SHISA2                          | 4.34E-05    | 0.512299543 |
| cg27602263 | RAX                             | 1.50E-05    | 0.512275303 |
| cg00380172 | SASH1                           | 1.96E-05    | 0.512192354 |
| cg22626169 |                                 | 1.11E-05    | 0.512176461 |
| cg12955441 | CCDC68;CCDC68                   | 8.60E-06    | 0.512160614 |
| cg16543094 |                                 | 8.60E-06    | 0.512120604 |
| cg22802813 | USP44;USP44                     | 8.60E-06    | 0.512008608 |
| cg02849693 | PRKCG                           | 3.34E-05    | 0.512004803 |
| cg06172871 | HP;HP                           | 1.11E-05    | 0.511987175 |
| cg15076145 | ATOH1                           | 8.60E-06    | 0.511956898 |
| cg01815538 | PRDM13                          | 1.18E-05    | 0.511879226 |
| cg25737323 | CLIP4                           | 0.000117986 | 0.511851242 |
| cg12877723 | PENK;PENK                       | 4.34E-05    | 0.511826609 |
| cg26606286 |                                 | 1.11E-05    | 0.511807321 |
| cg06981439 | LOC100130015;LOC100130015       | 3.34E-05    | 0.511795832 |
| cg19804605 | FAM163A;FAM163A                 | 1.50E-05    | 0.51177114  |
| cg19237294 | BRUNOL4;BRUNOL4;BRUNOL4;BRUNOL4 | 8.60E-06    | 0.511711264 |
| cg00549772 |                                 | 1.96E-05    | 0.511661667 |
| cg25597894 | IGSF21                          | 8.60E-06    | 0.511645753 |
| cg22380921 | CADM2;CADM2                     | 8.60E-06    | 0.511620364 |
| cg26609631 | GSX1;GSX1                       | 1.96E-05    | 0.511554249 |
| cg22982654 |                                 | 1.50E-05    | 0.51142564  |
| cg24911113 |                                 | 3.34E-05    | 0.511379706 |
| cg15542741 | SLC6A15;SLC6A15;SLC6A15         | 1.50E-05    | 0.511318667 |
| cg26164488 |                                 | 5.59E-05    | 0.511292955 |
| cg01307387 | VSNL1;VSNL1                     | 8.60E-06    | 0.511269803 |
| cg08644841 | FAM149A                         | 0.000233422 | 0.511169914 |
| cg08808128 | CLIP4;CLIP4                     | 0.000654035 | 0.511087457 |
| cg04883903 | NOS1                            | 5.59E-05    | 0.511079385 |
| cg14558114 | THNSL2                          | 8.60E-06    | 0.511055003 |
| cg16783279 | GPR26                           | 8.60E-06    | 0.510992897 |
| cg21669679 | DCC;DCC                         | 1.11E-05    | 0.510888048 |
| cg05711235 |                                 | 1.11E-05    | 0.510821672 |
| cg26836696 |                                 | 8.60E-06    | 0.510787854 |
| cg21868774 | FAM78B                          | 0.000187194 | 0.510783427 |
| cg20307896 |                                 | 1.50E-05    | 0.510667764 |
| cg00490655 | FIGN                            | 2.58E-05    | 0.510665669 |
| cg20219457 | DCLK1;DCLK1                     | 2.58E-05    | 0.510642529 |
| cg05876623 | NR2F2                           | 8.60E-06    | 0.510544455 |
| cg02315271 |                                 | 8.60E-06    | 0.510531784 |
| cg04688351 | PAX3;PAX3;PAX3;PAX3;PAX3;PAX3   | 9.24E-05    | 0.510498615 |
| cg18844382 | EFS;EFS                         | 5.59E-05    | 0.510421884 |
| cg04075191 | DPP10;DPP10;DPP10               | 1.50E-05    | 0.510356071 |
| cg10439765 | SLC12A5;SLC12A5;SLC12A5         | 1.11E-05    | 0.510337245 |
| cg21350575 | CHODL;CHODL                     | 1.96E-05    | 0.510275521 |
| cg26872137 | UNC5D                           | 1.50E-05    | 0.510242442 |

|            |                                                 |             |             |
|------------|-------------------------------------------------|-------------|-------------|
| cg18280830 |                                                 | 1.11E-05    | 0.510229549 |
| cg11382963 | MSC                                             | 1.60E-05    | 0.51020725  |
| cg09259037 | TBX18                                           | 8.60E-06    | 0.510201639 |
| cg18961681 |                                                 | 1.96E-05    | 0.510192777 |
| cg05139788 | TFAP2D                                          | 1.50E-05    | 0.510169191 |
| cg12919520 | GABRG3                                          | 7.23E-05    | 0.510026818 |
| cg18639233 | SIX6                                            | 2.58E-05    | 0.509978892 |
| cg14123942 | GRIN3A;GRIN3A                                   | 2.58E-05    | 0.509943752 |
| cg09499787 |                                                 | 0.000148457 | 0.509939109 |
| cg10923662 | TNXB                                            | 0.000290372 | 0.509869558 |
| cg22880677 | ARHGEF10                                        | 0.000117986 | 0.509851608 |
| cg09351156 | RNF144B                                         | 0.000233422 | 0.509823653 |
| cg04972745 |                                                 | 0.000357885 | 0.509767808 |
| cg25287071 | ITPKB                                           | 5.59E-05    | 0.509717944 |
| cg21402921 | GABRA5;GABRA5;GABRA5                            | 0.00043997  | 0.509699097 |
| cg04976324 | PROX1                                           | 0.000233422 | 0.509692313 |
| cg01022219 | C18orf1;C18orf1;C18orf1;C18orf1;C18orf1;C18orf1 | 8.60E-06    | 0.509668988 |
| cg08833577 | VAX1;VAX1                                       | 7.23E-05    | 0.509656261 |
| cg06976250 | ANKK1                                           | 9.24E-05    | 0.50963236  |
| cg08034379 | WDR69                                           | 1.18E-05    | 0.509586252 |
| cg11737232 |                                                 | 2.58E-05    | 0.509585095 |
| cg00991875 |                                                 | 8.60E-06    | 0.509561827 |
| cg17903776 | PCDH20                                          | 1.96E-05    | 0.509543238 |
| cg14548882 | MORN4;MORN4                                     | 3.34E-05    | 0.509337443 |
| cg22836229 | EFCAB1;EFCAB1;EFCAB1;EFCAB1;EFCAB1              | 1.50E-05    | 0.509279191 |
| cg20027133 | PAMR1;PAMR1                                     | 1.50E-05    | 0.509271075 |
| cg20494374 |                                                 | 8.60E-06    | 0.50920376  |
| cg17985646 | TBX20;TBX20                                     | 8.60E-06    | 0.509196896 |
| cg13201808 |                                                 | 1.50E-05    | 0.509129954 |
| cg05627029 |                                                 | 8.60E-06    | 0.509083319 |
| cg01815671 | CCDC37                                          | 1.60E-05    | 0.508989267 |
| cg15985184 | IGLON5                                          | 8.60E-06    | 0.508919764 |
| cg01587896 | ISL1                                            | 2.58E-05    | 0.508820631 |
| cg09205945 | CREB3L2                                         | 3.34E-05    | 0.508773512 |
| cg23763043 | NR2F2;NR2F2;NR2F2;MIR1469;NR2F2                 | 1.96E-05    | 0.508768226 |
| cg23152235 |                                                 | 1.96E-05    | 0.508759122 |
| cg19544662 | FOXI3                                           | 4.34E-05    | 0.508728282 |
| cg22987487 | EBF2                                            | 4.34E-05    | 0.508723137 |
| cg05206884 | SYN3;SYN3                                       | 1.50E-05    | 0.508707813 |
| cg14473924 | PDZRN3                                          | 1.11E-05    | 0.508689281 |
| cg00664416 | MANEAL;MANEAL;MANEAL;MANEAL                     | 1.96E-05    | 0.508613334 |
| cg05500840 | HOXD11                                          | 8.60E-06    | 0.508598543 |
| cg19542816 | HOXD1                                           | 8.60E-06    | 0.508515729 |
| cg08540953 | C7orf52                                         | 1.50E-05    | 0.5084931   |
| cg10089527 |                                                 | 3.21E-05    | 0.50844085  |
| cg11398511 | KCNK2;KCNK2;KCNK2;KCNK2;KCNK2                   | 1.50E-05    | 0.508420846 |
| cg12146673 | SST                                             | 1.11E-05    | 0.508416151 |
| cg04945331 | SOX14                                           | 2.58E-05    | 0.508342063 |
| cg03994318 |                                                 | 1.11E-05    | 0.508337839 |
| cg09863441 | HTR1E;HTR1E                                     | 0.000148457 | 0.508337623 |
| cg18177414 |                                                 | 1.96E-05    | 0.508302181 |
| cg23921342 | CSMD2                                           | 1.96E-05    | 0.508273385 |
| cg22531668 | VAX1                                            | 1.96E-05    | 0.508253394 |
| cg17305436 | ID4                                             | 0.000148457 | 0.508185469 |
| cg11007759 | FAM84A                                          | 5.59E-05    | 0.508169263 |
| cg10981909 | FAM159B;FAM159B                                 | 9.24E-05    | 0.508163105 |
| cg02300154 | WBSCR17                                         | 0.000290372 | 0.508148435 |
| cg02463418 | EPHA5;EPHA5;EPHA5;EPHA5                         | 9.24E-05    | 0.508141823 |
| cg26560222 | DMRTA2;DMRTA2                                   | 3.92E-05    | 0.508136651 |
| cg09772154 | FGFR2;FGFR2;FGFR2;FGFR2;FGFR2                   | 7.23E-05    | 0.508125241 |

|            |                                         |             |             |
|------------|-----------------------------------------|-------------|-------------|
| cg16086559 |                                         | 2.58E-05    | 0.508074019 |
| cg20699586 |                                         | 8.60E-06    | 0.507950962 |
| cg16596604 | CRYM                                    | 9.24E-05    | 0.507908907 |
| cg03691958 | DRD2;DRD2                               | 8.60E-06    | 0.507887781 |
| cg03981954 | FEZF1;FEZF1                             | 8.60E-06    | 0.507878465 |
| cg03217995 | HOXA9                                   | 3.34E-05    | 0.507873874 |
| cg02348751 | MGC45800                                | 2.58E-05    | 0.507801731 |
| cg27606499 | ZIC4;ZIC4;ZIC4;ZIC4;ZIC4                | 1.50E-05    | 0.507798577 |
| cg05181041 | ADAM12;ADAM12;ADAM12;ADAM12             | 1.50E-05    | 0.507783494 |
| cg14248715 | OTX2OS1                                 | 1.50E-05    | 0.507765828 |
| cg09442654 | FAM150A;FAM150A                         | 1.96E-05    | 0.507762274 |
| cg02012703 | VSTM2B                                  | 1.96E-05    | 0.507614456 |
| cg20222926 | FEZF1;FEZF1                             | 4.34E-05    | 0.507488031 |
| cg27228578 | DNAH9                                   | 8.60E-06    | 0.507410645 |
| cg17112089 | CTTNBP2                                 | 1.18E-05    | 0.507408473 |
| cg04643822 |                                         | 3.34E-05    | 0.507313205 |
| cg14658067 | UNCX                                    | 2.58E-05    | 0.507305808 |
| cg11781389 | GLB1L2                                  | 8.60E-06    | 0.507143978 |
| cg17177632 | FAM123C;FAM123C;FAM123C;FAM123C         | 1.50E-05    | 0.507129881 |
| cg11708616 | FOXQ1;FOXQ1                             | 8.60E-06    | 0.507075806 |
| cg19427188 | ACADL                                   | 2.58E-05    | 0.507068771 |
| cg05311412 | SLC5A7                                  | 5.59E-05    | 0.507062518 |
| cg07333792 |                                         | 2.58E-05    | 0.507020349 |
| cg12212657 | LRRN1                                   | 3.34E-05    | 0.507016872 |
| cg03943218 |                                         | 1.96E-05    | 0.506961913 |
| cg07972135 | GRIA4;GRIA4;GRIA4;GRIA4                 | 0.000148457 | 0.50692005  |
| cg13283952 |                                         | 1.50E-05    | 0.506894471 |
| cg13971892 | PPP2R2B;PPP2R2B;PPP2R2B;PPP2R2B;PPP2R2B | 1.96E-05    | 0.506872923 |
| cg23349790 | IGSF21;IGSF21                           | 3.34E-05    | 0.506753658 |
| cg13745201 |                                         | 1.11E-05    | 0.506714077 |
| cg17509967 | CACNA1A;CACNA1A;CACNA1A;CACNA1A         | 8.60E-06    | 0.506695869 |
| cg05768427 |                                         | 2.08E-05    | 0.506652135 |
| cg23121993 | IRX4                                    | 4.34E-05    | 0.506605677 |
| cg21106407 |                                         | 1.96E-05    | 0.506604547 |
| cg00437985 | CRYM                                    | 0.000233422 | 0.506586972 |
| cg20280350 | MCOLN3                                  | 8.60E-06    | 0.506559256 |
| cg05937737 | SLC7A14                                 | 1.50E-05    | 0.506527915 |
| cg26686277 | CCKBR;CCKBR                             | 2.58E-05    | 0.50642064  |
| cg22954449 | ADAMTS16                                | 5.59E-05    | 0.506417011 |
| cg15996480 |                                         | 0.000117986 | 0.506351975 |
| cg21153898 |                                         | 8.60E-06    | 0.506278936 |
| cg13184823 | MTNR1A                                  | 1.11E-05    | 0.506250462 |
| cg11244340 | HS6ST3                                  | 1.50E-05    | 0.506226662 |
| cg18396137 | FAM123C;FAM123C;FAM123C;FAM123C         | 2.39E-05    | 0.506138316 |
| cg10167837 | RAD51AP2                                | 4.34E-05    | 0.506135307 |
| cg11003573 | ZNF502;ZNF502;ZNF502;ZNF502             | 1.11E-05    | 0.506007588 |
| cg26252281 | RAB32;RAB32                             | 7.23E-05    | 0.505977563 |
| cg09022943 |                                         | 8.60E-06    | 0.505943291 |
| cg12744820 | OLIG3                                   | 3.34E-05    | 0.505930919 |
| cg09688601 | LEPREL1;LEPREL1;LEPREL1                 | 1.11E-05    | 0.505837146 |
| cg07918545 | FOXI2                                   | 1.50E-05    | 0.505832012 |
| cg25012919 | DCLK1                                   | 2.58E-05    | 0.505824694 |
| cg21425099 | CNTN4                                   | 8.60E-06    | 0.505821992 |
| cg01645753 | CPEB1                                   | 8.60E-06    | 0.505811712 |
| cg13707794 | RCAN1;RCAN1;RCAN1                       | 3.34E-05    | 0.50572818  |
| cg06833110 | MEIS1                                   | 9.24E-05    | 0.505724459 |
| cg06448705 | TRPC7;TRPC7;TRPC7;TRPC7;TRPC7;TRPC7     | 4.34E-05    | 0.505687636 |
| cg10165847 | NPAS2                                   | 0.000117986 | 0.505613188 |
| cg07547000 | GALNT13                                 | 1.50E-05    | 0.505610733 |
| cg18943957 | HLF                                     | 0.000148457 | 0.505591576 |

|            |                             |             |             |
|------------|-----------------------------|-------------|-------------|
| cg02644510 |                             | 0.000148457 | 0.505590272 |
| cg03897252 | ZNF365;ZNF365;ZNF365        | 1.50E-05    | 0.505555389 |
| cg03044249 | WBSCR17                     | 0.000205664 | 0.505497636 |
| cg23701643 | PPFIA2                      | 8.60E-06    | 0.505488019 |
| cg06822816 | MAL2                        | 2.58E-05    | 0.505467694 |
| cg21053831 |                             | 8.60E-06    | 0.505450689 |
| cg02374745 | FBXO39;FBXO39               | 1.96E-05    | 0.505424562 |
| cg16100120 | EFEMP1;EFEMP1;EFEMP1        | 1.11E-05    | 0.505384278 |
| cg24884142 | TBX15;TBX15                 | 8.60E-06    | 0.505383523 |
| cg07926691 | AMPH;AMPH;AMPH;AMPH         | 3.34E-05    | 0.505372287 |
| cg07971089 |                             | 0.000148457 | 0.505323936 |
| cg27554565 | NPHS1                       | 1.96E-05    | 0.50532293  |
| cg25288068 |                             | 8.60E-06    | 0.505313475 |
| cg01323964 | SNORA22;CCT6P1              | 5.59E-05    | 0.505181215 |
| cg03052970 | CACNG4                      | 0.000648283 | 0.505179286 |
| cg15044957 | KCNA4                       | 2.58E-05    | 0.505160845 |
| cg18057109 |                             | 1.11E-05    | 0.505149086 |
| cg11835068 | AJAP1;AJAP1                 | 9.24E-05    | 0.505106811 |
| cg06911121 | TBX5;TBX5                   | 1.50E-05    | 0.504994408 |
| cg04228468 | SLITRK3                     | 8.60E-06    | 0.504965349 |
| cg07697895 | WNT2;WNT2;WNT2              | 3.34E-05    | 0.504937468 |
| cg04003136 | HOXD1                       | 8.60E-06    | 0.504911238 |
| cg08169778 |                             | 8.60E-06    | 0.504871618 |
| cg06954658 | SALL3                       | 1.11E-05    | 0.504867365 |
| cg24774306 | CXCL6                       | 1.60E-05    | 0.50486479  |
| cg03564793 | COL12A1;COL12A1             | 1.50E-05    | 0.504841164 |
| cg00373707 |                             | 1.96E-05    | 0.504763003 |
| cg24452260 | GRIA2;GRIA2;GRIA2           | 1.11E-05    | 0.504757369 |
| cg15528437 |                             | 8.60E-06    | 0.504754017 |
| cg22991101 | DZIP1;DZIP1                 | 1.11E-05    | 0.504735995 |
| cg24346629 |                             | 8.60E-06    | 0.504717742 |
| cg05062676 | CYP1B1                      | 0.000233422 | 0.504687377 |
| cg07893544 | KDR                         | 2.58E-05    | 0.504654125 |
| cg03077331 | FN3K                        | 1.11E-05    | 0.504636667 |
| cg01921432 | BARHL2                      | 8.60E-06    | 0.504524106 |
| cg16561893 |                             | 1.11E-05    | 0.504512149 |
| cg26040903 | HSPA12A                     | 1.50E-05    | 0.50450865  |
| cg11414560 | PHACTR3;PHACTR3             | 3.34E-05    | 0.50448073  |
| cg00579717 | RANBP17                     | 8.60E-06    | 0.50447511  |
| cg02246426 | GDF6                        | 9.24E-05    | 0.504467205 |
| cg20750832 |                             | 1.50E-05    | 0.504460876 |
| cg02328010 | RYR2                        | 8.60E-06    | 0.504411634 |
| cg00466268 | SLITRK3                     | 1.96E-05    | 0.504400288 |
| cg23972738 | MEIS1                       | 8.60E-06    | 0.504366259 |
| cg15042080 | TMEM74;TMEM74               | 1.50E-05    | 0.504148936 |
| cg23931421 | SYNE1;SYNE1                 | 2.58E-05    | 0.504113014 |
| cg18866015 | DCC                         | 1.96E-05    | 0.504050319 |
| cg19824907 | GPC6;GPC6                   | 4.34E-05    | 0.504019386 |
| cg22295787 | ADRA1A;ADRA1A;ADRA1A;ADRA1A | 0.000148457 | 0.504015011 |
| cg10541517 | TMEM132C                    | 4.34E-05    | 0.504005852 |
| cg10700424 | GLB1L2;GLB1L2               | 4.34E-05    | 0.503991865 |
| cg07813249 | GABRA2;GABRA2               | 2.58E-05    | 0.503984358 |
| cg19312427 | NEK7                        | 1.96E-05    | 0.503971333 |
| cg06585566 |                             | 2.58E-05    | 0.503951999 |
| cg20443254 | ASCL4                       | 4.34E-05    | 0.503864988 |
| cg05078238 | SNED1                       | 7.23E-05    | 0.503847195 |
| cg11382055 | KCNK1                       | 8.60E-06    | 0.503844973 |
| cg03544320 | CRMP1                       | 4.34E-05    | 0.503833254 |
| cg25048344 | C1QL2                       | 4.34E-05    | 0.503798887 |
| cg27039662 |                             | 1.50E-05    | 0.503778394 |

|            |                                 |             |             |
|------------|---------------------------------|-------------|-------------|
| cg25403721 |                                 | 8.60E-06    | 0.503765929 |
| cg00342532 | KCNC3;KCNC3                     | 1.60E-05    | 0.503713347 |
| cg02649987 | GUCY1A2                         | 5.59E-05    | 0.503713269 |
| cg14653643 | LCA5;LCA5                       | 0.000357885 | 0.503696068 |
| cg23553442 |                                 | 8.60E-06    | 0.503687598 |
| cg22354782 | NGF                             | 1.96E-05    | 0.50350502  |
| cg07395354 | MEOX2                           | 8.60E-06    | 0.503473857 |
| cg24886257 |                                 | 4.34E-05    | 0.50344458  |
| cg19180624 | HOXD1                           | 8.60E-06    | 0.503439259 |
| cg04628434 | GPR126;GPR126;GPR126;GPR126     | 3.34E-05    | 0.503430146 |
| cg07908870 | C3orf59                         | 8.60E-06    | 0.503397512 |
| cg13169011 |                                 | 8.60E-06    | 0.503371521 |
| cg26116485 | WNT5A                           | 1.96E-05    | 0.503362202 |
| cg02167438 | PAK7;PAK7                       | 1.11E-05    | 0.503336716 |
| cg26121591 | CPLX2;CPLX2;CPLX2               | 5.59E-05    | 0.503314245 |
| cg23460843 |                                 | 4.34E-05    | 0.503245748 |
| cg24239148 | C10orf107;C10orf107             | 4.34E-05    | 0.503235934 |
| cg13371788 | VGLL2;VGLL2;VGLL2;VGLL2         | 8.60E-06    | 0.503214622 |
| cg23627335 |                                 | 3.34E-05    | 0.503211981 |
| cg09654247 |                                 | 0.000148457 | 0.503198648 |
| cg18488157 |                                 | 2.58E-05    | 0.503173128 |
| cg26544742 |                                 | 1.11E-05    | 0.503147526 |
| cg23474211 | ZNF804B                         | 7.23E-05    | 0.503145819 |
| cg07625840 | PRSS12                          | 8.60E-06    | 0.503124323 |
| cg18989709 | SLITRK3                         | 8.60E-06    | 0.503118892 |
| cg24721899 | NKX3-2                          | 1.96E-05    | 0.503115307 |
| cg03556653 |                                 | 0.000205664 | 0.503094385 |
| cg25045219 | C17orf97                        | 0.000187194 | 0.503074657 |
| cg04928005 | THRB;THRB;THRB                  | 5.59E-05    | 0.503013188 |
| cg04532952 | CA4                             | 4.34E-05    | 0.502835377 |
| cg14500486 | FNDC1                           | 4.34E-05    | 0.502765071 |
| cg00804628 | NXPH2                           | 2.58E-05    | 0.502716602 |
| cg04481181 | SLITRK3                         | 8.60E-06    | 0.502697092 |
| cg27407147 | LOC254559                       | 2.58E-05    | 0.502683707 |
| cg23379425 | MAPK15                          | 1.11E-05    | 0.502681333 |
| cg21461100 | NOVA2                           | 8.60E-06    | 0.502664568 |
| cg13833484 |                                 | 8.60E-06    | 0.502652521 |
| cg14510812 | SLC6A15;SLC6A15;SLC6A15         | 8.60E-06    | 0.502543782 |
| cg26916166 | NMNAT2;NMNAT2                   | 4.34E-05    | 0.502537242 |
| cg18815943 | FOXE3                           | 4.34E-05    | 0.502537198 |
| cg25756435 | MAST1                           | 8.60E-06    | 0.50251488  |
| cg10774877 | NALCN                           | 1.11E-05    | 0.50239199  |
| cg20637307 | ERBB4;ERBB4                     | 5.59E-05    | 0.502336786 |
| cg23234832 | THRB;THRB;THRB                  | 0.00043997  | 0.502312077 |
| cg27029179 | CADM1;CADM1                     | 3.34E-05    | 0.502282808 |
| cg05085500 |                                 | 8.60E-06    | 0.50228021  |
| cg26938597 |                                 | 1.50E-05    | 0.502271123 |
| cg04805619 | ZBBX                            | 8.60E-06    | 0.502269331 |
| cg03147210 | THEM4                           | 9.24E-05    | 0.502172531 |
| cg19861741 |                                 | 8.60E-06    | 0.502137283 |
| cg06501832 | ROBO3                           | 9.24E-05    | 0.5021165   |
| cg24569447 |                                 | 8.60E-06    | 0.502087801 |
| cg12352124 |                                 | 1.50E-05    | 0.501967484 |
| cg15490715 |                                 | 1.18E-05    | 0.501831781 |
| cg12727398 |                                 | 0.000148457 | 0.501813151 |
| cg00335712 | ATOH1                           | 2.58E-05    | 0.50174253  |
| cg25382400 | SOX2OT                          | 1.11E-05    | 0.50167929  |
| cg19962116 | NUDT16P;NUDT16P                 | 8.60E-06    | 0.501642731 |
| cg02441747 | COL25A1;COL25A1;COL25A1;COL25A1 | 8.60E-06    | 0.501538361 |
| cg24496021 | FCHSD2                          | 4.34E-05    | 0.501527437 |

|            |                                    |             |             |
|------------|------------------------------------|-------------|-------------|
| cg11531021 | OBSL1                              | 7.23E-05    | 0.501517389 |
| cg22484737 |                                    | 4.34E-05    | 0.501453733 |
| cg17716664 | LMX1A                              | 1.18E-05    | 0.501453172 |
| cg12417685 | FAM19A4;FAM19A4                    | 2.58E-05    | 0.501382389 |
| cg00399483 | DCC                                | 1.11E-05    | 0.501363186 |
| cg12041848 | EYA2;EYA2;EYA2;EYA2                | 0.000122184 | 0.501349458 |
| cg04454086 | PCDHAC2;PCDHA7;PCDHA12;PCDHA6;PCDH | 8.60E-06    | 0.501318948 |
| cg11664500 | EYA4;EYA4;EYA4                     | 0.000233422 | 0.501299172 |
| cg12605662 | RAX                                | 4.34E-05    | 0.501277522 |
| cg07612562 | CNTNAP2;CNTNAP2                    | 1.96E-05    | 0.501251447 |
| cg17500587 |                                    | 1.11E-05    | 0.50122461  |
| cg26886381 | DZIP1;DZIP1                        | 2.16E-05    | 0.501211125 |
| cg06411724 | MEOX2                              | 8.60E-06    | 0.501211121 |
| cg11421604 | MAP1B                              | 2.58E-05    | 0.50120681  |
| cg12545687 | PCDH8;PCDH8                        | 8.60E-06    | 0.501172742 |
| cg02250594 | ONECUT2                            | 1.11E-05    | 0.501099103 |
| cg25385529 | MPPED2                             | 2.58E-05    | 0.501093057 |
| cg11142389 | ZIC4;ZIC1                          | 8.60E-06    | 0.500990906 |
| cg09670128 | KRT7;KRT7                          | 4.34E-05    | 0.500962423 |
| cg14480116 | SPRED2;SPRED2                      | 0.000117986 | 0.500937356 |
| cg26745332 | ATOH1                              | 2.58E-05    | 0.500914402 |
| cg13337047 |                                    | 8.60E-06    | 0.500895322 |
| cg01904183 | TRAM1L1                            | 1.11E-05    | 0.5008718   |
| cg02640260 | ATOH1                              | 1.96E-05    | 0.500866388 |
| cg13974632 | BDNF;BDNF;BDNF;BDNF;BDNF           | 2.58E-05    | 0.500828789 |
| cg23774356 | GSC2                               | 5.59E-05    | 0.500761829 |
| cg16400794 | CD164L2                            | 9.24E-05    | 0.500702908 |
| cg00310968 | SPAG17                             | 1.50E-05    | 0.500702368 |
| cg06802658 | MIPOL1                             | 8.60E-06    | 0.50069115  |
| cg10293925 | AMPH;AMPH;AMPH;AMPH                | 4.34E-05    | 0.500686231 |
| cg02378440 |                                    | 4.34E-05    | 0.500634592 |
| cg25828350 | LOC201651                          | 1.96E-05    | 0.500606793 |
| cg09103619 | ANKRD34C                           | 3.21E-05    | 0.500564045 |
| cg12598235 | LOC254559                          | 3.34E-05    | 0.50052586  |
| cg07570470 |                                    | 5.59E-05    | 0.500482838 |
| cg20309794 | CLDN3                              | 3.21E-05    | 0.50037803  |
| cg06269753 | MSC                                | 8.60E-06    | 0.500348779 |
| cg07115626 |                                    | 1.11E-05    | 0.500342342 |
| cg24172269 | IGSF9B                             | 1.50E-05    | 0.500334275 |
| cg08154348 | RIPPLY2                            | 2.58E-05    | 0.500288161 |
| cg23696752 | GRM1;GRM1                          | 3.34E-05    | 0.500280069 |
| cg24834659 |                                    | 1.11E-05    | 0.500266931 |
| cg24164564 |                                    | 1.11E-05    | 0.500257825 |
| cg18273840 | HCN1                               | 2.58E-05    | 0.500222769 |
| cg09834794 |                                    | 1.96E-05    | 0.500188349 |
| cg18115040 | HOXD10                             | 8.60E-06    | 0.500187483 |
| cg02725885 | PPAP2C;PPAP2C;PPAP2C               | 0.000117986 | 0.500171731 |
| cg25439496 |                                    | 1.96E-05    | 0.500170077 |
| cg26983177 |                                    | 8.60E-06    | 0.500163939 |
| cg05502701 | PDZRN3                             | 1.50E-05    | 0.500130341 |
| cg00384539 | PRDM14                             | 3.34E-05    | 0.500086963 |
| cg17130063 | KCNK2;KCNK2;KCNK2                  | 1.11E-05    | 0.500082968 |
| cg25177452 | TMEM171;TMEM171                    | 2.58E-05    | 0.500061027 |
| cg23620822 | LOC285375                          | 0.000233422 | 0.500056041 |
| cg27615388 | HTR1A                              | 1.96E-05    | 0.500009386 |
| cg09735723 | SORCS3                             | 1.50E-05    | 0.499900852 |
| cg27416337 | CNOT10                             | 4.34E-05    | 0.499781014 |
| cg07291836 | TP53RK                             | 0.000117986 | 0.499712165 |
| cg24439256 | LOC100128811;GPR158                | 8.60E-06    | 0.499706758 |
| cg08230483 | GRID1                              | 7.23E-05    | 0.49963349  |



|            |                                    |             |             |
|------------|------------------------------------|-------------|-------------|
| cg00636427 | NFATC1;NFATC1;NFATC1;NFATC1;NFATC1 | 7.23E-05    | 0.499578476 |
| cg02837536 | AJAP1;AJAP1                        | 0.000187194 | 0.499543609 |
| cg05283542 | COL8A1;MIR548G;COL8A1              | 1.50E-05    | 0.499516894 |
| cg13410614 | SLC2A6;SLC2A6                      | 1.11E-05    | 0.499434541 |
| cg24403845 | SORCS1;SORCS1                      | 0.000290372 | 0.499410154 |
| cg07115542 | NKX2-1;NKX2-1                      | 1.96E-05    | 0.499371585 |
| cg03860256 | MOV10L1;MOV10L1;MOV10L1            | 1.96E-05    | 0.499363012 |
| cg02290110 | SHC2                               | 8.60E-06    | 0.499336113 |
| cg23676439 | LRAT                               | 8.60E-06    | 0.4993337   |
| cg09874822 | CACNA1H;CACNA1H                    | 0.000187194 | 0.499281791 |
| cg21678813 |                                    | 8.60E-06    | 0.49923349  |
| cg05755408 | TRIM35                             | 5.59E-05    | 0.499231232 |
| cg18235734 |                                    | 8.60E-06    | 0.499208823 |
| cg22620221 | DPP6                               | 8.60E-06    | 0.499110273 |
| cg16856049 |                                    | 8.60E-06    | 0.499093643 |
| cg19613722 | DCC                                | 8.60E-06    | 0.498991462 |
| cg12234855 | CLDN3                              | 8.60E-06    | 0.498970772 |
| cg06490869 | CRYM                               | 0.000233422 | 0.498962927 |
| cg21266502 |                                    | 2.58E-05    | 0.498926709 |
| cg01861537 |                                    | 4.34E-05    | 0.498852673 |
| cg04118306 | NEFM;NEFM                          | 0.000290372 | 0.498848635 |
| cg11979589 | COL25A1;COL25A1                    | 8.60E-06    | 0.498838399 |
| cg27663938 | C12orf42;C12orf42                  | 5.59E-05    | 0.498829781 |
| cg25051341 | PRDM13                             | 8.60E-06    | 0.498827999 |
| cg02658488 | REM1                               | 2.58E-05    | 0.498824712 |
| cg11916609 | IL1RL1                             | 4.34E-05    | 0.498800043 |
| cg02789965 | PLK5P                              | 8.60E-06    | 0.498763855 |
| cg24722073 |                                    | 8.60E-06    | 0.498741646 |
| cg08732352 |                                    | 0.000334462 | 0.498735917 |
| cg19873491 | FAM149A                            | 0.000955793 | 0.498703959 |
| cg25067242 | NGF                                | 1.96E-05    | 0.498689905 |
| cg18326021 | SORCS3                             | 8.60E-06    | 0.498635065 |
| cg16750440 | C10orf79                           | 9.24E-05    | 0.498604079 |
| cg05120028 | CYP24A1;CYP24A1                    | 5.59E-05    | 0.498567714 |
| cg03418552 | CADM1;CADM1                        | 8.60E-06    | 0.498545613 |
| cg14184078 | CBLN4;CBLN4                        | 8.60E-06    | 0.498534131 |
| cg16046980 | KRT18;KRT18;KRT18                  | 1.96E-05    | 0.498518344 |
| cg10324219 | GLB1L2                             | 2.08E-05    | 0.498487756 |
| cg05003422 | MCOLN3                             | 1.18E-05    | 0.498487133 |
| cg16849609 | C1QL2                              | 1.50E-05    | 0.498477064 |
| cg03793270 | NOX4;NOX4;NOX4;NOX4                | 3.34E-05    | 0.498453634 |
| cg10778841 | SORCS3                             | 8.60E-06    | 0.498427239 |
| cg22135105 | PRDM5                              | 1.50E-05    | 0.49837581  |
| cg18470839 |                                    | 1.11E-05    | 0.498309123 |
| cg07201456 | CHST6                              | 7.23E-05    | 0.498284038 |
| cg27549720 | HTR6;HTR6                          | 5.59E-05    | 0.498266496 |
| cg13906811 | NRXN1;NRXN1;NRXN1                  | 2.58E-05    | 0.49825461  |
| cg25976242 | SLC35F1                            | 8.60E-06    | 0.498251531 |
| cg11878331 |                                    | 3.34E-05    | 0.498214577 |
| cg20492807 | DNAH14;DNAH14;DNAH14               | 5.59E-05    | 0.498187256 |
| cg10125626 | FOXQ1                              | 8.60E-06    | 0.498147675 |
| cg24663256 | KCNIP4;KCNIP4                      | 2.58E-05    | 0.498115918 |
| cg15545772 | TDRD5;TDRD5                        | 7.23E-05    | 0.498103369 |
| cg14298200 |                                    | 2.58E-05    | 0.498077131 |
| cg04487296 |                                    | 8.60E-06    | 0.498044266 |
| cg18197392 | SSTR4                              | 5.59E-05    | 0.498022465 |
| cg27375072 | SMPDL3A                            | 1.11E-05    | 0.498012902 |
| cg18345806 | NMU                                | 7.23E-05    | 0.497908767 |
| cg03356747 | GRID1                              | 4.34E-05    | 0.497864512 |
| cg04487855 |                                    | 8.60E-06    | 0.497795334 |

|            |                                         |             |             |
|------------|-----------------------------------------|-------------|-------------|
| cg17697633 | TFAP2A                                  | 5.59E-05    | 0.497795047 |
| cg11964564 | KCNS2                                   | 0.000117986 | 0.497743145 |
| cg23900203 |                                         | 8.60E-06    | 0.497739905 |
| cg12825070 | HTR4;HTR4;HTR4;HTR4;HTR4;HTR4;HTR4;HT   | 1.11E-05    | 0.497719255 |
| cg02388150 | SFRP1                                   | 2.58E-05    | 0.497710406 |
| cg24202123 | STAC                                    | 5.59E-05    | 0.497582917 |
| cg07245225 |                                         | 2.58E-05    | 0.497516121 |
| cg11028201 |                                         | 2.58E-05    | 0.497476633 |
| cg12001304 | SPHKAP;SPHKAP                           | 8.60E-06    | 0.49746896  |
| cg23322933 |                                         | 7.23E-05    | 0.497420739 |
| cg01978237 | SIM1                                    | 8.60E-06    | 0.497415835 |
| cg21149266 | FAM63B;FAM63B                           | 9.24E-05    | 0.497409648 |
| cg12111714 | ATP8A2                                  | 1.11E-05    | 0.497396737 |
| cg20232986 |                                         | 8.60E-06    | 0.497347306 |
| cg04293902 |                                         | 8.60E-06    | 0.497297146 |
| cg03900143 | ZIC4;ZIC4;ZIC4;ZIC4;ZIC4                | 8.60E-06    | 0.497241043 |
| cg08233654 | SNED1                                   | 9.24E-05    | 0.497232603 |
| cg18710278 | CDH18;CDH18                             | 2.58E-05    | 0.497227205 |
| cg10166283 | ZNF229                                  | 0.000117986 | 0.49721719  |
| cg07737781 | MLXIPL;MLXIPL;MLXIPL;MLXIPL;MLXIPL;MLXI | 8.60E-06    | 0.49717229  |
| cg19042459 | DCC                                     | 1.11E-05    | 0.497130443 |
| cg11955474 | CD164L2;CD164L2                         | 5.59E-05    | 0.497130286 |
| cg17017591 |                                         | 8.60E-06    | 0.497088302 |
| cg19268498 | CCDC39                                  | 2.58E-05    | 0.497030792 |
| cg22630875 | DOCK5                                   | 1.96E-05    | 0.497016129 |
| cg26249106 | RFX6                                    | 1.50E-05    | 0.496987804 |
| cg09780241 |                                         | 0.000148457 | 0.496951017 |
| cg25201811 | NALCN                                   | 2.58E-05    | 0.496828316 |
| cg19991022 | DOK5                                    | 0.00156564  | 0.496800613 |
| cg03205140 | PLEKHA1                                 | 2.58E-05    | 0.496746204 |
| cg06247406 | GRIK2;GRIK2;GRIK2                       | 1.11E-05    | 0.496731684 |
| cg20107759 | RTBDN;RTBDN                             | 1.50E-05    | 0.496668458 |
| cg07157830 | NID1                                    | 4.34E-05    | 0.496646481 |
| cg15202954 | NALCN                                   | 9.24E-05    | 0.496460838 |
| cg26355573 | LOC642597                               | 8.60E-06    | 0.496411715 |
| cg00812438 |                                         | 1.96E-05    | 0.496397838 |
| cg20961469 |                                         | 2.58E-05    | 0.49639667  |
| cg03769371 | LCA5;LCA5                               | 0.000233422 | 0.496370001 |
| cg15484988 | GALR1                                   | 1.11E-05    | 0.496368812 |
| cg08161323 | CXCL1                                   | 8.60E-06    | 0.496248771 |
| cg05965392 | FAM150A                                 | 8.60E-06    | 0.496221051 |
| cg14878520 | MNX1;MNX1                               | 8.60E-06    | 0.496206458 |
| cg13632816 | SVEP1;SVEP1                             | 8.60E-06    | 0.49611256  |
| cg09423283 | GRM1;GRM1                               | 8.60E-06    | 0.496094595 |
| cg08992872 | CALB1;CALB1                             | 4.34E-05    | 0.496019209 |
| cg08356637 |                                         | 5.59E-05    | 0.495988884 |
| cg07237939 | SLC22A3                                 | 1.96E-05    | 0.495976024 |
| cg21184369 | HTRA4;PLEKHA2                           | 7.23E-05    | 0.495952846 |
| cg27135692 | RTN1;RTN1;RTN1                          | 1.50E-05    | 0.495930642 |
| cg20148575 |                                         | 0.000233422 | 0.495854495 |
| cg25732462 | LYPD5                                   | 4.34E-05    | 0.495805654 |
| cg09852127 | PCDHA12;PCDHA7;PCDHA6;PCDHA10;PCDH      | 1.11E-05    | 0.49579972  |
| cg08462988 |                                         | 1.96E-05    | 0.495772214 |
| cg06697267 | FOXA2;FOXA2                             | 2.58E-05    | 0.4957405   |
| cg13062406 | PTPN5;PTPN5;PTPN5                       | 1.96E-05    | 0.495582016 |
| cg14502484 | SLC6A3                                  | 1.96E-05    | 0.495580043 |
| cg03738352 | SLC34A2                                 | 4.34E-05    | 0.495533778 |
| cg00989765 | KDR                                     | 3.34E-05    | 0.495522826 |
| cg23873669 | RANBP17                                 | 8.60E-06    | 0.495476273 |
| cg17912835 |                                         | 1.96E-05    | 0.495469968 |

|            |                                        |             |             |
|------------|----------------------------------------|-------------|-------------|
| cg12535280 | PARVA                                  | 8.60E-06    | 0.495351063 |
| cg23649708 | RALYL;RALYL;RALYL;RALYL                | 2.80E-05    | 0.495331921 |
| cg08917478 | ISL1                                   | 8.60E-06    | 0.495311849 |
| cg19965221 | TJP1;TJP1;TJP1;TJP1                    | 8.60E-06    | 0.495269977 |
| cg21295575 | TM7SF4;TM7SF4                          | 5.59E-05    | 0.495255827 |
| cg24312063 |                                        | 8.60E-06    | 0.495180489 |
| cg26827247 | CCDC67                                 | 8.60E-06    | 0.495116084 |
| cg19157819 | SYNPO2L;SYNPO2L                        | 3.34E-05    | 0.495098516 |
| cg26144658 | SNCAIP                                 | 3.34E-05    | 0.495092818 |
| cg09578475 | ZNF177                                 | 2.58E-05    | 0.495061404 |
| cg02093112 | FBXO39                                 | 7.23E-05    | 0.495024137 |
| cg06000951 | MOCS1;MOCS1;MOCS1                      | 2.58E-05    | 0.495021388 |
| cg07305933 | PVT1                                   | 1.50E-05    | 0.49502092  |
| cg18023283 | SLC6A15;SLC6A15;SLC6A15                | 8.60E-06    | 0.494993834 |
| cg16002355 | PITX2;PITX2;PITX2                      | 3.34E-05    | 0.494992472 |
| cg17463745 |                                        | 1.96E-05    | 0.494992404 |
| cg14344261 | PAX5                                   | 0.000233422 | 0.494980986 |
| cg11354594 | STOX2;STOX2                            | 2.58E-05    | 0.494972833 |
| cg05378938 | TDRD5                                  | 5.59E-05    | 0.494954784 |
| cg24724428 | ELOVL2                                 | 4.34E-05    | 0.494932637 |
| cg22871668 | EYA4;EYA4;EYA4                         | 0.000955793 | 0.49488383  |
| cg27315556 | NLGN1                                  | 8.60E-06    | 0.494850312 |
| cg18920423 | PTF1A                                  | 1.50E-05    | 0.494817621 |
| cg05604079 | QRFPR                                  | 3.21E-05    | 0.494799178 |
| cg05133179 |                                        | 1.96E-05    | 0.494703733 |
| cg25430838 |                                        | 4.34E-05    | 0.494660951 |
| cg05666607 | POU4F3                                 | 5.59E-05    | 0.494566837 |
| cg08939095 | BNC1                                   | 1.11E-05    | 0.494539239 |
| cg12746059 | PCDH10;PCDH10                          | 5.59E-05    | 0.494510192 |
| cg12781700 | C17orf104                              | 2.58E-05    | 0.494440357 |
| cg20574436 | BCL11B;BCL11B                          | 7.23E-05    | 0.494411498 |
| cg07448060 | MAGI2                                  | 1.11E-05    | 0.494322947 |
| cg23746497 |                                        | 2.58E-05    | 0.494316205 |
| cg19922137 | SYT14;SYT14;SYT14;SYT14;SYT14;SYT14;SY | 8.60E-06    | 0.494278268 |
| cg13791254 | FOXE1                                  | 3.34E-05    | 0.494224328 |
| cg02853616 |                                        | 1.11E-05    | 0.494216331 |
| cg21187769 | GRID2                                  | 1.50E-05    | 0.494211803 |
| cg26963271 | PDE4B;PDE4B                            | 1.60E-05    | 0.494202249 |
| cg01068944 |                                        | 4.34E-05    | 0.494188683 |
| cg12560987 |                                        | 8.60E-06    | 0.494094594 |
| cg17673237 | FAM155A                                | 1.11E-05    | 0.494045994 |
| cg11826826 | PPP2R2B;PPP2R2B;PPP2R2B;PPP2R2B;PPP2   | 4.34E-05    | 0.494028584 |
| cg00690148 | C1QL2;C1QL2                            | 0.000117986 | 0.494023979 |
| cg17397150 |                                        | 2.58E-05    | 0.493969408 |
| cg06374165 | FGF12                                  | 7.23E-05    | 0.493949388 |
| cg07052390 | IGSF9B                                 | 4.34E-05    | 0.493901585 |
| cg03718824 |                                        | 3.34E-05    | 0.493887206 |
| cg18437365 |                                        | 0.000357885 | 0.493862397 |
| cg18011364 | RELN;RELN                              | 8.60E-06    | 0.493857193 |
| cg27112897 | WSCD1                                  | 0.000233422 | 0.493852539 |
| cg07615497 |                                        | 0.000117986 | 0.493852083 |
| cg05191076 | EPHA5;EPHA5                            | 2.58E-05    | 0.493845521 |
| cg10755235 |                                        | 8.60E-06    | 0.493789279 |
| cg26660002 | GALNT13                                | 8.60E-06    | 0.493734273 |
| cg17382198 | STL                                    | 0.003189589 | 0.493648371 |
| cg19355087 | NKX6-2                                 | 3.30E-05    | 0.493626865 |
| cg23842255 | NEFH                                   | 8.60E-06    | 0.493622308 |
| cg27321750 | ARHGAP8;PRR5-ARHGAP8;ARHGAP8           | 2.58E-05    | 0.493587792 |
| cg10374084 | C19orf41                               | 1.96E-05    | 0.493582971 |
| cg04204831 | LOC255167;LOC255167                    | 8.60E-06    | 0.493509851 |

|            |                         |             |             |
|------------|-------------------------|-------------|-------------|
| cg04688051 | LYNX1;LYNX1;LYNX1;LYNX1 | 1.50E-05    | 0.493500035 |
| cg22450968 |                         | 8.60E-06    | 0.493485487 |
| cg01082512 |                         | 1.11E-05    | 0.493458913 |
| cg02286091 | BHMT;BHMT               | 2.58E-05    | 0.493397078 |
| cg03682581 | C2orf68                 | 9.24E-05    | 0.493336907 |
| cg16108230 |                         | 1.96E-05    | 0.493336667 |
| cg23663774 | PITX2;PITX2             | 0.00043997  | 0.493226402 |
| cg01405040 | HOXD12                  | 1.11E-05    | 0.493206917 |
| cg10059660 | KCTD8                   | 8.60E-06    | 0.493188933 |
| cg00777689 | KCNK1                   | 0.000117986 | 0.493162718 |
| cg25942450 | TLX3                    | 8.60E-06    | 0.493155954 |
| cg18327061 | CLVS1                   | 8.60E-06    | 0.493101536 |
| cg04290346 | DBX1                    | 7.23E-05    | 0.493060805 |
| cg20168751 | FAM149A                 | 0.000148457 | 0.492928487 |
| cg16052198 | FPR2                    | 7.23E-05    | 0.492915388 |
| cg18294691 |                         | 1.50E-05    | 0.492868019 |
| cg00582524 | SALL1;SALL1;SALL1       | 0.00043997  | 0.492852912 |
| cg11377136 | PKDREJ                  | 5.59E-05    | 0.49282139  |
| cg01201519 |                         | 8.60E-06    | 0.492792365 |
| cg26595278 |                         | 1.11E-05    | 0.492747438 |
| cg25165358 | GALR1                   | 1.96E-05    | 0.492747291 |
| cg26280713 | THBS2                   | 1.96E-05    | 0.492705554 |
| cg18240143 | C14orf39                | 3.34E-05    | 0.492689051 |
| cg26252167 | GPR6                    | 1.18E-05    | 0.492672318 |
| cg07029873 | ESRRG;ESRRG             | 2.58E-05    | 0.49261911  |
| cg08813099 | MRAS;MRAS               | 1.96E-05    | 0.492610932 |
| cg22653976 | MYOD1                   | 3.21E-05    | 0.492574269 |
| cg14018471 | C9orf156                | 7.23E-05    | 0.4925372   |
| cg20611882 | GPR177;GPR177           | 1.96E-05    | 0.492501192 |
| cg03963198 | IRX4;IRX4               | 8.60E-06    | 0.492466797 |
| cg14271531 | ID4;ID4                 | 0.000117986 | 0.492437834 |
| cg06550984 | PTF1A                   | 1.50E-05    | 0.492406134 |
| cg14189571 | ZFP42;ZFP42             | 1.50E-05    | 0.492375451 |
| cg22389375 | KCNQ1DN                 | 1.11E-05    | 0.492358087 |
| cg25049597 | CPLX3;CPLX3             | 8.60E-06    | 0.492339259 |
| cg16629702 | SLC6A2                  | 1.50E-05    | 0.492307138 |
| cg23615676 | KCNN2                   | 1.50E-05    | 0.492306757 |
| cg16877924 | NOTO                    | 3.34E-05    | 0.492285992 |
| cg11592503 | CNTNAP2                 | 2.58E-05    | 0.492276063 |
| cg04899175 | NOS1                    | 3.34E-05    | 0.492273586 |
| cg11369071 | LOC100270746;C6orf41    | 7.23E-05    | 0.492175978 |
| cg00619126 |                         | 8.60E-06    | 0.492119415 |
| cg01277542 | SLC6A2                  | 8.60E-06    | 0.492054621 |
| cg26133769 | PCDH7;PCDH7;PCDH7       | 8.60E-06    | 0.492028327 |
| cg14923640 | NXPH2                   | 1.11E-05    | 0.492001261 |
| cg23890008 |                         | 3.34E-05    | 0.491960723 |
| cg04617948 | FOXI2                   | 1.60E-05    | 0.491950003 |
| cg02995271 | FAM83H                  | 4.34E-05    | 0.491829478 |
| cg11842415 | LHX8                    | 8.60E-06    | 0.491754338 |
| cg02642914 | CADM1;CADM1             | 1.50E-05    | 0.491733019 |
| cg27403635 | KCNN2;KCNN2             | 1.50E-05    | 0.491701034 |
| cg09605164 |                         | 1.50E-05    | 0.491602791 |
| cg08659357 | HRASLS;HRASLS;MGC2889   | 8.60E-06    | 0.491596277 |
| cg24041541 | LOC100192378            | 8.60E-06    | 0.491584852 |
| cg22049569 | CACNG8                  | 1.96E-05    | 0.491553474 |
| cg06312848 | KBTBD2                  | 9.24E-05    | 0.491492841 |
| cg21161891 | KDR                     | 3.34E-05    | 0.491446012 |
| cg18716164 | VSTM2B                  | 3.34E-05    | 0.491437423 |
| cg03308628 | USP44;USP44             | 1.11E-05    | 0.491386227 |
| cg26527487 | LPPR5;LPPR5             | 1.11E-05    | 0.491373612 |

|            |                                     |             |             |
|------------|-------------------------------------|-------------|-------------|
| cg04476927 |                                     | 1.50E-05    | 0.49131886  |
| cg26595643 | VAX1;VAX1                           | 2.58E-05    | 0.491314773 |
| cg09360770 | FOXC2                               | 0.000148457 | 0.491314133 |
| cg23651826 |                                     | 8.60E-06    | 0.491276696 |
| cg17959327 |                                     | 5.59E-05    | 0.491188051 |
| cg13473356 | PEX5L                               | 8.60E-06    | 0.491173541 |
| cg01899437 | CCDC149;CCDC149                     | 0.000290372 | 0.491145612 |
| cg24881420 | TLX3                                | 8.60E-06    | 0.491127305 |
| cg07604651 | FEZF1;FEZF1                         | 8.60E-06    | 0.491120058 |
| cg27526665 | THRB;THRB;THRB                      | 0.00043997  | 0.491070017 |
| cg02230017 | A2BP1;A2BP1                         | 1.11E-05    | 0.491060787 |
| cg10964367 | ARHGEF10                            | 0.000117986 | 0.491032134 |
| cg00289546 | ACADL                               | 3.34E-05    | 0.491019686 |
| cg02974320 | TPBG;TPBG                           | 0.001147425 | 0.490990798 |
| cg16257051 |                                     | 2.58E-05    | 0.49099005  |
| cg07719492 | PRDM14                              | 1.96E-05    | 0.490985628 |
| cg07915921 |                                     | 7.23E-05    | 0.490910288 |
| cg16556145 | CLDN10;CLDN10;CLDN10                | 1.11E-05    | 0.490897057 |
| cg18396984 | NKX2-8                              | 8.60E-06    | 0.490881056 |
| cg00596508 | CNTN1;CNTN1                         | 1.11E-05    | 0.490817754 |
| cg05361559 | EGR3                                | 0.000117986 | 0.49081473  |
| cg24842260 | C10orf41;C10orf41                   | 8.60E-06    | 0.490813937 |
| cg24561661 | HOXD11                              | 8.60E-06    | 0.490804781 |
| cg23428985 | CLIP4                               | 0.000357885 | 0.490756579 |
| cg14688104 | KCNS2;KCNS2                         | 7.23E-05    | 0.49071059  |
| cg25943503 | DCLK1                               | 3.21E-05    | 0.490678938 |
| cg20377305 | DLX5                                | 5.59E-05    | 0.490673199 |
| cg00840332 | LEP                                 | 1.96E-05    | 0.490662862 |
| cg15285250 | NXPH1                               | 8.60E-06    | 0.490642749 |
| cg06375628 |                                     | 7.23E-05    | 0.490580528 |
| cg20959460 |                                     | 8.60E-06    | 0.490576514 |
| cg08305436 |                                     | 8.60E-06    | 0.490536088 |
| cg06648277 | NKX6-2                              | 8.60E-06    | 0.490491715 |
| cg14996220 | ALX1                                | 2.39E-05    | 0.490485885 |
| cg02344833 | ZSCAN1                              | 1.11E-05    | 0.490472361 |
| cg01448863 | SLC10A1                             | 4.34E-05    | 0.490443785 |
| cg07354556 | NMU                                 | 7.23E-05    | 0.490354606 |
| cg21649258 | ST6GAL2;ST6GAL2;ST6GAL2             | 1.18E-05    | 0.490347326 |
| cg27230882 |                                     | 1.96E-05    | 0.490337158 |
| cg18410685 |                                     | 0.000187194 | 0.490285156 |
| cg24504349 |                                     | 1.50E-05    | 0.490196359 |
| cg06831576 | CDH8                                | 4.34E-05    | 0.490195462 |
| cg03078043 | SYT12                               | 1.50E-05    | 0.490193554 |
| cg04807594 | AGTR1;AGTR1;AGTR1;AGTR1;AGTR1;AGTR1 | 2.58E-05    | 0.490129097 |
| cg25497250 | GPR120                              | 5.59E-05    | 0.490070124 |
| cg10197862 | TMEM20;TMEM20                       | 3.34E-05    | 0.490054194 |
| cg13671919 | LOC642597                           | 1.11E-05    | 0.490044279 |
| cg16919569 | NBLA00301;HAND2                     | 1.96E-05    | 0.490034371 |
| cg17124829 |                                     | 1.96E-05    | 0.490015441 |
| cg09559189 | EBF2                                | 4.34E-05    | 0.489991125 |
| cg25372296 |                                     | 2.58E-05    | 0.489945205 |
| cg15707093 | NBLA00301;HAND2                     | 3.34E-05    | 0.489918254 |
| cg15237494 | ADAMTS5;ADAMTS5                     | 1.11E-05    | 0.489902149 |
| cg18663063 | MARVELD2;MARVELD2                   | 1.96E-05    | 0.48989499  |
| cg23141355 |                                     | 5.59E-05    | 0.489842506 |
| cg05589784 |                                     | 7.23E-05    | 0.489831456 |
| cg15461105 |                                     | 2.39E-05    | 0.4898312   |
| cg14616514 | MOCS1;MOCS1                         | 3.34E-05    | 0.489762303 |
| cg14306734 | BRUNOL4;BRUNOL4;BRUNOL4;BRUNOL4     | 7.23E-05    | 0.489706588 |
| cg25092838 | OTX2OS1                             | 8.60E-06    | 0.489687131 |

|            |                                 |             |             |
|------------|---------------------------------|-------------|-------------|
| cg14123543 |                                 | 1.11E-05    | 0.489677329 |
| cg20026939 |                                 | 1.50E-05    | 0.489675359 |
| cg04741853 |                                 | 5.59E-05    | 0.489656572 |
| cg04624110 | MACROD2                         | 7.23E-05    | 0.489650537 |
| cg22869726 | OLIG2;OLIG2                     | 5.59E-05    | 0.489600032 |
| cg08461949 |                                 | 3.34E-05    | 0.489571769 |
| cg08058544 |                                 | 2.58E-05    | 0.489526393 |
| cg17877704 |                                 | 1.11E-05    | 0.489488905 |
| cg04926361 | SFTA3;SFTA3                     | 5.59E-05    | 0.489470886 |
| cg24248713 | NOL4                            | 8.60E-06    | 0.48943201  |
| cg18136062 | RORA                            | 0.000290372 | 0.489424529 |
| cg27600205 | PCDH10;PCDH10                   | 5.59E-05    | 0.489380978 |
| cg17616554 | CFTR                            | 1.11E-05    | 0.489352199 |
| cg21176048 | PEX5L                           | 1.50E-05    | 0.489345825 |
| cg14383135 | NPAS2                           | 7.23E-05    | 0.489342636 |
| cg02019444 | ITSN1;ITSN1                     | 1.50E-05    | 0.489318186 |
| cg18247055 | SPAG6;SPAG6                     | 3.92E-05    | 0.489178165 |
| cg15978561 | HDAC4                           | 4.34E-05    | 0.489172468 |
| cg22876812 |                                 | 0.000233422 | 0.489169327 |
| cg24569492 |                                 | 8.60E-06    | 0.489150048 |
| cg24292761 |                                 | 2.58E-05    | 0.489084094 |
| cg17641904 | C9orf4                          | 3.34E-05    | 0.489060694 |
| cg13084677 | LOC401127                       | 1.11E-05    | 0.489046083 |
| cg05948940 | SMPD3                           | 0.00043997  | 0.489042069 |
| cg18512515 |                                 | 7.23E-05    | 0.489022376 |
| cg24881205 | SP8;SP8                         | 0.000187194 | 0.489000244 |
| cg23733177 | ADAMTS1                         | 5.11E-05    | 0.488933723 |
| cg23604012 | SGPP2                           | 7.23E-05    | 0.488931465 |
| cg14142007 | HOXD9                           | 1.50E-05    | 0.488931451 |
| cg22043168 | BDNF;BDNF;BDNF;BDNF;BDNF;BDNF   | 1.96E-05    | 0.488928799 |
| cg02456288 |                                 | 8.60E-06    | 0.488868189 |
| cg18990313 | HTRA4                           | 1.96E-05    | 0.48885248  |
| cg07857251 | BICC1                           | 1.96E-05    | 0.488794738 |
| cg21183256 |                                 | 1.96E-05    | 0.488792291 |
| cg12161122 | BRUNOL4;BRUNOL4;BRUNOL4;BRUNOL4 | 8.60E-06    | 0.488784081 |
| cg19975933 | P4HA3                           | 1.50E-05    | 0.488762587 |
| cg03440556 | SCD                             | 2.80E-05    | 0.488755595 |
| cg19878482 | C8orf73                         | 1.96E-05    | 0.488707202 |
| cg27448015 | SMPDL3A                         | 1.50E-05    | 0.488695689 |
| cg18786593 |                                 | 0.000357885 | 0.488688209 |
| cg16289355 | FAM149A                         | 7.23E-05    | 0.488680191 |
| cg07099331 |                                 | 1.96E-05    | 0.488670311 |
| cg23181844 | TMEM196                         | 7.23E-05    | 0.488642781 |
| cg03958038 | C10orf41;C10orf41               | 8.60E-06    | 0.488575336 |
| cg16042149 | NEFH                            | 8.60E-06    | 0.488532776 |
| cg18060185 | TMEM171;TMEM171                 | 1.96E-05    | 0.488485953 |
| cg15361750 | GPR77                           | 0.000187194 | 0.488408559 |
| cg03799283 |                                 | 8.60E-06    | 0.488398574 |
| cg17940587 | MINPP1                          | 0.000187194 | 0.488393901 |
| cg02571816 | PPP1R14A                        | 0.000205664 | 0.488331898 |
| cg03625109 | DBC1                            | 1.96E-05    | 0.48832411  |
| cg14885748 |                                 | 1.50E-05    | 0.488300398 |
| cg20090283 | SRCIN1                          | 2.58E-05    | 0.488262481 |
| cg04281464 |                                 | 5.59E-05    | 0.488244595 |
| cg25718467 | LOC145845                       | 2.58E-05    | 0.488223869 |
| cg04663790 |                                 | 7.23E-05    | 0.488208882 |
| cg16190732 | CHST8;CHST8;CHST8;CHST8         | 5.59E-05    | 0.488179013 |
| cg20191310 | C20orf103;C20orf103             | 0.000262362 | 0.4881644   |
| cg15173134 | SLC18A2                         | 4.34E-05    | 0.488138861 |
| cg17885226 |                                 | 8.60E-06    | 0.488119072 |

|            |                                 |             |             |
|------------|---------------------------------|-------------|-------------|
| cg13272701 | MAL2                            | 8.60E-06    | 0.488115486 |
| cg23479922 | MARCH11                         | 1.96E-05    | 0.488098499 |
| cg00495860 |                                 | 4.34E-05    | 0.488091968 |
| cg11849798 | ZNF706;ZNF706;ZNF706            | 0.000148457 | 0.488031742 |
| cg07222309 |                                 | 1.96E-05    | 0.488008256 |
| cg03099208 | NXPH1                           | 8.60E-06    | 0.487992206 |
| cg08608974 | PRKD1;PRKD1                     | 1.96E-05    | 0.487979879 |
| cg18478319 | SLC15A1                         | 4.34E-05    | 0.487959767 |
| cg23786625 | SORCS3                          | 8.60E-06    | 0.487941095 |
| cg11779273 | INTU                            | 5.59E-05    | 0.487918619 |
| cg20902817 |                                 | 8.60E-06    | 0.487884926 |
| cg02447304 |                                 | 8.60E-06    | 0.487830935 |
| cg27363327 | TTBK1                           | 0.00043997  | 0.487812446 |
| cg06719445 | FOXN3                           | 0.000117986 | 0.487770659 |
| cg08445263 | GABRG3                          | 2.58E-05    | 0.487745844 |
| cg18061259 | RFX4                            | 8.60E-06    | 0.487738984 |
| cg26682580 | TMEM132C                        | 2.58E-05    | 0.487728832 |
| cg18132916 |                                 | 9.24E-05    | 0.487724281 |
| cg21512644 | NPY2R;NPY2R                     | 1.11E-05    | 0.487714482 |
| cg27376707 | A2BP1;A2BP1                     | 8.60E-06    | 0.48769386  |
| cg17942639 | RPRM;RPRM                       | 7.23E-05    | 0.487580173 |
| cg16105687 |                                 | 1.96E-05    | 0.487554996 |
| cg22958090 | KRT7                            | 5.59E-05    | 0.487515441 |
| cg05863502 | CACNA1B                         | 1.50E-05    | 0.48750773  |
| cg20906291 |                                 | 8.60E-06    | 0.487506837 |
| cg14882700 | OTOP1                           | 1.50E-05    | 0.48747915  |
| cg13046832 | C14orf23                        | 3.34E-05    | 0.487434952 |
| cg25829666 | THRB;THRB;THRB                  | 0.000308169 | 0.48742784  |
| cg23142394 | LOC283392;TRHDE;LOC283392       | 9.24E-05    | 0.487344384 |
| cg19971716 | QRFPR                           | 4.34E-05    | 0.48731784  |
| cg05821789 |                                 | 5.59E-05    | 0.487307006 |
| cg07551545 | FBXO17;FBXO17                   | 1.96E-05    | 0.487272977 |
| cg01827633 | TTLL4                           | 1.96E-05    | 0.487231975 |
| cg20398486 |                                 | 0.000148457 | 0.4872116   |
| cg20122925 |                                 | 1.11E-05    | 0.487191398 |
| cg05700339 | CIDEA;CIDEA                     | 7.23E-05    | 0.487135281 |
| cg25634742 | RAB32                           | 7.23E-05    | 0.487125476 |
| cg15447787 |                                 | 4.34E-05    | 0.487071044 |
| cg07780543 |                                 | 1.11E-05    | 0.487066782 |
| cg02128567 | KCNK5;KCNK5                     | 7.23E-05    | 0.487061995 |
| cg18166862 | FAM78B                          | 4.34E-05    | 0.487059515 |
| cg14386496 | EPA5;EPA5                       | 5.59E-05    | 0.487055315 |
| cg19714279 | GBX2                            | 1.50E-05    | 0.487032637 |
| cg02306630 | NKX6-2                          | 8.60E-06    | 0.486997603 |
| cg12853633 |                                 | 1.96E-05    | 0.486994454 |
| cg24613080 | ACCN1                           | 9.24E-05    | 0.486992618 |
| cg25999442 | CHST8;CHST8                     | 0.000117986 | 0.486976646 |
| cg08119884 | CTNNA2;CTNNA2                   | 4.34E-05    | 0.486967374 |
| cg20780105 | C5orf43                         | 3.34E-05    | 0.486926617 |
| cg09403666 |                                 | 1.11E-05    | 0.48685848  |
| cg26831119 | PITX2;PITX2                     | 2.58E-05    | 0.486834654 |
| cg19945554 |                                 | 8.60E-06    | 0.486798145 |
| cg05475440 | NLK                             | 5.59E-05    | 0.486765448 |
| cg27563985 | CBLN4                           | 4.34E-05    | 0.486741424 |
| cg10200388 |                                 | 4.34E-05    | 0.486726482 |
| cg27456468 | FLJ32063                        | 3.34E-05    | 0.486660381 |
| cg24052359 |                                 | 8.60E-06    | 0.486660371 |
| cg16949120 | NKX6-2                          | 8.60E-06    | 0.48665509  |
| cg06003986 | BRUNOL4;BRUNOL4;BRUNOL4;BRUNOL4 | 0.000117986 | 0.486615798 |
| cg19806642 | GRM6                            | 0.000148457 | 0.486585799 |

|            |                                    |             |             |
|------------|------------------------------------|-------------|-------------|
| cg10679182 | EXOC4                              | 3.34E-05    | 0.486543234 |
| cg17991823 | CIDEA;CIDEA                        | 2.08E-05    | 0.486525063 |
| cg03064067 | SLC6A15;SLC6A15;SLC6A15            | 1.11E-05    | 0.486511643 |
| cg24416513 | HOXD8;HOXD8                        | 0.00043997  | 0.486463592 |
| cg14009588 | TFAP2A;TFAP2A                      | 9.24E-05    | 0.486397113 |
| cg08202754 |                                    | 7.23E-05    | 0.48638881  |
| cg04562217 | ROBO1                              | 8.60E-06    | 0.486379735 |
| cg09547099 | WWC1;WWC1;WWC1                     | 4.34E-05    | 0.486379184 |
| cg18325622 | MARCH11                            | 3.34E-05    | 0.486353655 |
| cg23070026 | ADAMTS9                            | 0.000233422 | 0.486331596 |
| cg24843474 | RGS7                               | 5.59E-05    | 0.486316096 |
| cg18710929 | SLC35F1                            | 4.34E-05    | 0.486273219 |
| cg18194734 | FAM123C;FAM123C;FAM123C;FAM123C    | 0.000148457 | 0.486244846 |
| cg11098259 | AQP9                               | 1.96E-05    | 0.486243761 |
| cg19925849 | CACNG7                             | 8.60E-06    | 0.486243265 |
| cg18781240 | WASF3                              | 0.000117986 | 0.48622869  |
| cg15142192 | EIF2C3;EIF2C3                      | 5.59E-05    | 0.48619409  |
| cg17397592 | IQCA1                              | 3.34E-05    | 0.486165685 |
| cg24772753 | SP5                                | 3.34E-05    | 0.486152357 |
| cg22694818 | LHX8                               | 1.50E-05    | 0.486127079 |
| cg26861460 | PARVG;PARVG;PARVG;PARVG            | 5.59E-05    | 0.486005215 |
| cg10715092 | MIR663                             | 8.60E-06    | 0.485974546 |
| cg17504999 | PCDH10;PCDH10                      | 8.60E-06    | 0.485965125 |
| cg15015920 | MARCH11;MARCH11                    | 1.96E-05    | 0.485958183 |
| cg16073349 | CAMK2B;CAMK2B;CAMK2B;CAMK2B;CAMK2B | 0.000122184 | 0.485931731 |
| cg14763548 | VSX1;VSX1                          | 0.000117986 | 0.485908027 |
| cg10980436 | NPHS2;NPHS2                        | 1.50E-05    | 0.485874689 |
| cg04935434 |                                    | 1.11E-05    | 0.485804317 |
| cg01229798 | GRID1                              | 0.000117986 | 0.485785854 |
| cg21748223 | NPY5R                              | 7.23E-05    | 0.485760468 |
| cg11751645 | LRRC55                             | 1.96E-05    | 0.485758237 |
| cg22442454 | IRF6;IRF6                          | 3.34E-05    | 0.485748497 |
| cg12882697 | SLC6A3                             | 8.60E-06    | 0.485730205 |
| cg15132565 |                                    | 5.59E-05    | 0.485717844 |
| cg11390378 |                                    | 8.60E-06    | 0.485702924 |
| cg03705912 | MARCH11                            | 8.60E-06    | 0.485677752 |
| cg15715477 |                                    | 4.34E-05    | 0.485659658 |
| cg10958452 | KDM4A                              | 9.24E-05    | 0.485651066 |
| cg16771578 | ALDH1L1                            | 4.34E-05    | 0.485587226 |
| cg00557947 |                                    | 9.24E-05    | 0.485581982 |
| cg02036261 | OTX2                               | 0.00043997  | 0.485574792 |
| cg24163575 |                                    | 8.60E-06    | 0.485554724 |
| cg21609106 | EGFLAM                             | 3.21E-05    | 0.485512633 |
| cg16573782 | CBLN1;CBLN1                        | 7.23E-05    | 0.485506507 |
| cg21537235 | PCDHAC2;PCDHA7;PCDHA12;PCDHA6;PCDH | 1.11E-05    | 0.485504882 |
| cg11581865 |                                    | 3.34E-05    | 0.485484089 |
| cg15672437 | F7;F7                              | 3.92E-05    | 0.485469319 |
| cg10463150 | HELT                               | 2.58E-05    | 0.485436339 |
| cg23619365 |                                    | 7.23E-05    | 0.485366223 |
| cg25123102 | CDH22                              | 8.60E-06    | 0.485308446 |
| cg07535928 | SLC25A21;SLC25A21;LOC100129794     | 8.60E-06    | 0.485275002 |
| cg04842426 | CHRM2;CHRM2;CHRM2;CHRM2;CHRM2;CHR  | 5.59E-05    | 0.485263455 |
| cg10795659 | TMEM171;TMEM171                    | 2.58E-05    | 0.485213206 |
| cg08124446 |                                    | 1.11E-05    | 0.485175832 |
| cg08482682 | RAB39                              | 5.59E-05    | 0.485148417 |
| cg22747746 | NKX2-6                             | 5.59E-05    | 0.485122213 |
| cg07201620 | EDIL3                              | 1.50E-05    | 0.485107191 |
| cg13434308 | TMTC1                              | 1.60E-05    | 0.485077268 |
| cg05926722 |                                    | 3.34E-05    | 0.485035092 |
| cg12861945 | C4orf39;TRIM61                     | 0.001393182 | 0.485001423 |



|            |                                                 |             |             |
|------------|-------------------------------------------------|-------------|-------------|
| cg20941820 | ADAMTS17                                        | 0.000537905 | 0.484993383 |
| cg15025240 | C2orf65                                         | 9.24E-05    | 0.484983231 |
| cg02606840 | MGAT4A;MGAT4A                                   | 4.34E-05    | 0.484978063 |
| cg00791024 |                                                 | 8.60E-06    | 0.484905257 |
| cg11492102 |                                                 | 3.34E-05    | 0.484896128 |
| cg00631837 | PHF21B;PHF21B                                   | 1.11E-05    | 0.484833582 |
| cg17316316 |                                                 | 1.50E-05    | 0.484829762 |
| cg24329557 | GCM2                                            | 1.11E-05    | 0.484821195 |
| cg24864161 | MOV10L1;MOV10L1;MOV10L1                         | 4.34E-05    | 0.484800982 |
| cg08610901 |                                                 | 0.000537905 | 0.484766245 |
| cg12478384 | ADAMTS9                                         | 0.000187194 | 0.484731349 |
| cg00056074 |                                                 | 1.50E-05    | 0.484717006 |
| cg22501388 | PDZRN4                                          | 0.000148457 | 0.484693497 |
| cg06809544 | MAGI2                                           | 2.58E-05    | 0.484691635 |
| cg24324985 | FOXA2                                           | 2.58E-05    | 0.484659427 |
| cg21475834 | UGGT2                                           | 8.60E-06    | 0.484620483 |
| cg02215641 | KCNIP4;KCNIP4;KCNIP4;KCNIP4                     | 8.60E-06    | 0.484609615 |
| cg02629106 | PCDP1                                           | 3.34E-05    | 0.484609528 |
| cg27199820 | GRM7;GRM7;GRM7;GRM7                             | 1.96E-05    | 0.484600637 |
| cg24947764 |                                                 | 1.50E-05    | 0.484591526 |
| cg08330404 |                                                 | 3.34E-05    | 0.484546798 |
| cg01429039 | SPATA18                                         | 4.34E-05    | 0.48448581  |
| cg13533340 | GDA                                             | 1.50E-05    | 0.484451555 |
| cg23528247 | C3orf26;FILIP1L;FILIP1L;C3orf26                 | 3.34E-05    | 0.484406236 |
| cg15485728 | PRUNE2                                          | 8.60E-06    | 0.484345269 |
| cg09696939 | BICC1                                           | 1.50E-05    | 0.484339432 |
| cg23466339 | MRAS;MRAS                                       | 2.58E-05    | 0.484263403 |
| cg06622999 | LOC283392;TRHDE;LOC283392                       | 5.59E-05    | 0.48421515  |
| cg20072171 | FEZF2                                           | 0.000148457 | 0.48419588  |
| cg04021697 | WDR8                                            | 9.24E-05    | 0.484190298 |
| cg27578811 | CPEB1                                           | 5.59E-05    | 0.484138444 |
| cg03540175 | CCDC36;CCDC36;CCDC36                            | 1.11E-05    | 0.484050409 |
| cg00503302 |                                                 | 7.23E-05    | 0.483978653 |
| cg23657299 |                                                 | 8.60E-06    | 0.483957746 |
| cg14168923 | GSX1                                            | 5.59E-05    | 0.483925818 |
| cg09614415 | FOXI2                                           | 2.58E-05    | 0.483922023 |
| cg04674956 |                                                 | 9.24E-05    | 0.483881651 |
| cg04967578 | C18orf1;C18orf1;C18orf1;C18orf1;C18orf1;C18orf1 | 8.60E-06    | 0.483841707 |
| cg27458987 | PKP2;PKP2                                       | 1.96E-05    | 0.483840204 |
| cg22558303 | UGGT2                                           | 1.11E-05    | 0.483823171 |
| cg07152216 |                                                 | 0.000290372 | 0.483802639 |
| cg23891360 | TMEM132D                                        | 2.58E-05    | 0.483802292 |
| cg26119543 |                                                 | 1.50E-05    | 0.483791783 |
| cg26983710 | GALNT13                                         | 1.96E-05    | 0.483734819 |
| cg23642130 | ZNF536                                          | 2.58E-05    | 0.483707276 |
| cg02409351 | ALX1                                            | 8.60E-06    | 0.483664458 |
| cg16822939 | MATN4;MATN4;MATN4                               | 2.58E-05    | 0.483570793 |
| cg08696727 | MKX                                             | 1.96E-05    | 0.483569659 |
| cg22028075 |                                                 | 1.11E-05    | 0.483540107 |
| cg25134283 | SMOC2;SMOC2;SMOC2;SMOC2                         | 7.23E-05    | 0.483535238 |
| cg22604123 | ZBTB8B                                          | 2.80E-05    | 0.483523842 |
| cg10887386 |                                                 | 2.58E-05    | 0.483501441 |
| cg00871358 |                                                 | 1.50E-05    | 0.483498139 |
| cg19236679 | GFRA1;GFRA1;GFRA1                               | 0.000233422 | 0.483416423 |
| cg06737494 | GHSR;GHSR                                       | 5.59E-05    | 0.483333233 |
| cg10652393 | GABRA5;GABRA5;GABRA5                            | 0.000148457 | 0.483327399 |
| cg22474464 | NKX2-2                                          | 0.000117986 | 0.483324789 |
| cg24937747 | IRX4                                            | 8.60E-06    | 0.483313939 |
| cg16400492 | PCDHA7;PCDHA12;PCDHA6;PCDHAC1;PCDH              | 1.50E-05    | 0.483222852 |
| cg03036557 | GPC5                                            | 2.58E-05    | 0.48322103  |

|            |                                      |             |             |
|------------|--------------------------------------|-------------|-------------|
| cg04176888 | CYP2A13                              | 4.34E-05    | 0.483195796 |
| cg24188415 | EMX2;EMX2OS;EMX2                     | 4.34E-05    | 0.483182109 |
| cg04227922 |                                      | 1.96E-05    | 0.483141003 |
| cg25951981 | GABRA4                               | 1.96E-05    | 0.48302515  |
| cg15575222 | RAD21L1                              | 0.000187194 | 0.483005509 |
| cg16619395 | GPR149                               | 5.59E-05    | 0.482986849 |
| cg21197774 | FGF12;FGF12;FGF12                    | 1.11E-05    | 0.482985577 |
| cg27296293 | TRPC6                                | 1.50E-05    | 0.482909377 |
| cg24506862 | BRUNOL4;BRUNOL4;BRUNOL4;BRUNOL4      | 1.50E-05    | 0.482861968 |
| cg24199834 | POU4F2;POU4F2                        | 1.50E-05    | 0.482837095 |
| cg21751684 | LOC254559                            | 2.58E-05    | 0.482833747 |
| cg24871414 |                                      | 3.34E-05    | 0.482812621 |
| cg01627823 | PAX9                                 | 3.34E-05    | 0.482805431 |
| cg14524936 | SLC6A5                               | 8.60E-06    | 0.482780443 |
| cg18840956 | PCSK1                                | 2.58E-05    | 0.482759783 |
| cg18678353 | PTPN5;PTPN5;PTPN5                    | 2.58E-05    | 0.482727498 |
| cg21545862 |                                      | 3.34E-05    | 0.482586155 |
| cg10758057 |                                      | 9.24E-05    | 0.482547309 |
| cg03834767 | CDK14                                | 2.58E-05    | 0.482539681 |
| cg18021902 | WDR8                                 | 4.34E-05    | 0.482494636 |
| cg08194879 | CLVS2                                | 8.60E-06    | 0.482483603 |
| cg08346159 | NPY5R                                | 5.59E-05    | 0.482427727 |
| cg20600210 | APCDD1L                              | 1.96E-05    | 0.482345056 |
| cg16331920 | MEOX2                                | 8.60E-06    | 0.482335885 |
| cg07441518 |                                      | 8.60E-06    | 0.482304186 |
| cg10790429 |                                      | 8.60E-06    | 0.48228568  |
| cg08620154 |                                      | 8.60E-06    | 0.482281364 |
| cg14451382 |                                      | 1.11E-05    | 0.482277565 |
| cg17603132 | RIC3;RIC3                            | 2.58E-05    | 0.482233704 |
| cg27603796 | CTTNBP2                              | 8.60E-06    | 0.482155368 |
| cg11154070 | BRUNOL4;BRUNOL4;BRUNOL4;BRUNOL4;BR   | 8.60E-06    | 0.482126901 |
| cg10174867 | DNAH14;DNAH14;DNAH14;DNAH14;DNAH14;D | 8.60E-06    | 0.481957085 |
| cg00564737 |                                      | 1.11E-05    | 0.481811824 |
| cg08882038 |                                      | 0.000148457 | 0.481799063 |
| cg22839075 | SYN2;SYN2                            | 3.34E-05    | 0.481794883 |
| cg11955385 |                                      | 1.18E-05    | 0.481790041 |
| cg25761791 |                                      | 3.34E-05    | 0.481749961 |
| cg14287112 | EYA4;EYA4;EYA4                       | 0.000537905 | 0.481725419 |
| cg00003298 | LHX5                                 | 4.34E-05    | 0.481712016 |
| cg14156405 | RGS7;RGS7                            | 3.34E-05    | 0.481632175 |
| cg14243778 | CNTN1;CNTN1                          | 1.11E-05    | 0.481455603 |
| cg09907509 | C13orf36;C13orf36                    | 1.11E-05    | 0.481417658 |
| cg18324798 | DNAH9                                | 1.96E-05    | 0.481396643 |
| cg06274159 | ZFP42                                | 0.000117986 | 0.481379705 |
| cg19320476 | FAM181B                              | 3.34E-05    | 0.481371023 |
| cg25122395 | DCC                                  | 1.11E-05    | 0.481346807 |
| cg02391906 | LPPR1                                | 8.60E-06    | 0.481336956 |
| cg17573292 | SOD3                                 | 1.96E-05    | 0.481334797 |
| cg12019801 | ZNF516                               | 1.96E-05    | 0.481301072 |
| cg24762932 |                                      | 8.60E-06    | 0.481300642 |
| cg21932814 | CSTA                                 | 4.34E-05    | 0.481277225 |
| cg05252264 | FCAR;FCAR;FCAR;FCAR;FCAR;FCAR;FCAR;F | 7.23E-05    | 0.481266122 |
| cg17091361 | TEKT3                                | 1.18E-05    | 0.481245862 |
| cg07520506 | CD163L1                              | 1.96E-05    | 0.481234861 |
| cg03014326 | ANKRD30B;ANKRD30B                    | 0.001948248 | 0.481154216 |
| cg15286044 | CRTAC1                               | 2.58E-05    | 0.481067531 |
| cg23708361 | CNTNAP2                              | 3.34E-05    | 0.48102669  |
| cg25859468 | MEOX2;MEOX2                          | 1.96E-05    | 0.480999794 |
| cg00590139 | A2BP1;A2BP1;A2BP1                    | 8.60E-06    | 0.480964603 |
| cg04592811 | PIGL                                 | 7.23E-05    | 0.480941964 |

|            |                          |             |             |
|------------|--------------------------|-------------|-------------|
| cg19029325 |                          | 2.58E-05    | 0.480923481 |
| cg27319123 | KCNA4;KCNA4              | 1.50E-05    | 0.480867798 |
| cg11747183 |                          | 8.60E-06    | 0.480861719 |
| cg10211058 |                          | 2.58E-05    | 0.480859241 |
| cg25432696 | CXCL6                    | 1.50E-05    | 0.48085032  |
| cg20429104 | ZNF516                   | 3.34E-05    | 0.480811927 |
| cg14664412 | CSTA;CSTA                | 8.60E-06    | 0.480803855 |
| cg11012046 | GLB1L2                   | 9.24E-05    | 0.480743588 |
| cg22158769 | LOC375196;LOC100271715   | 8.60E-06    | 0.480715389 |
| cg17275781 |                          | 1.96E-05    | 0.480669695 |
| cg11286023 | CPLX1;CPLX1              | 9.24E-05    | 0.480667554 |
| cg03688058 | STEAP2;STEAP2            | 5.59E-05    | 0.480652161 |
| cg23248150 | TLL1                     | 8.60E-06    | 0.480594252 |
| cg00368636 |                          | 0.000187194 | 0.480573591 |
| cg04346283 | FAM46A                   | 2.58E-05    | 0.480538995 |
| cg15540138 | TLL1                     | 0.000148457 | 0.480536111 |
| cg14117138 | HIF3A                    | 0.000148457 | 0.480515864 |
| cg07837260 |                          | 8.60E-06    | 0.480479628 |
| cg04098866 |                          | 1.96E-05    | 0.480463714 |
| cg27357571 | OLIG2                    | 4.34E-05    | 0.48044886  |
| cg19754554 | PDE4B;PDE4B              | 1.11E-05    | 0.480445849 |
| cg10792302 |                          | 7.23E-05    | 0.480438484 |
| cg04834436 | IRX6                     | 1.50E-05    | 0.48038569  |
| cg16028201 | KANK4;KANK4              | 7.23E-05    | 0.480377092 |
| cg16050974 | RBP7                     | 0.000122184 | 0.480370671 |
| cg07846220 | LAMA1                    | 4.34E-05    | 0.480357458 |
| cg16580499 | SALL3                    | 1.96E-05    | 0.480333553 |
| cg23286646 | SIM2                     | 0.000233422 | 0.480328392 |
| cg21961487 | RFX4                     | 3.34E-05    | 0.480327596 |
| cg15244223 | SLC35F1                  | 8.60E-06    | 0.48028279  |
| cg12492885 | C22orf45;C22orf45;UPB1   | 8.60E-06    | 0.480264011 |
| cg25312594 | KCNK1                    | 8.60E-06    | 0.480263942 |
| cg06893138 | HIST3H2BB;HIST3H2A       | 8.60E-06    | 0.480247946 |
| cg02858606 | CDH8                     | 1.11E-05    | 0.480244795 |
| cg02281208 | GABRG3                   | 1.50E-05    | 0.480241138 |
| cg22249612 | CD63;CD63                | 5.59E-05    | 0.480234285 |
| cg03882585 | SYNE1;SYNE1;SYNE1        | 1.11E-05    | 0.480231291 |
| cg08231709 | KCNS2                    | 1.96E-05    | 0.480209117 |
| cg25317664 | SLC30A10;SLC30A10        | 2.58E-05    | 0.480189297 |
| cg02912326 | GPR63;GPR63              | 9.24E-05    | 0.480110613 |
| cg02033582 |                          | 2.58E-05    | 0.480069066 |
| cg04556126 | ZIC4;ZIC4;ZIC4;ZIC4;ZIC4 | 2.58E-05    | 0.480062558 |
| cg03478199 | GRM1;GRM1;GRM1;GRM1      | 7.23E-05    | 0.480052276 |
| cg02311414 | FAM84A                   | 3.34E-05    | 0.480045484 |
| cg03735496 | GREB1L                   | 5.59E-05    | 0.480039869 |
| cg21566689 |                          | 7.23E-05    | 0.480038821 |
| cg21357629 |                          | 4.34E-05    | 0.479999856 |
| cg27493010 |                          | 1.50E-05    | 0.479981169 |
| cg12260653 | TMEM20;TMEM20            | 2.08E-05    | 0.479976228 |
| cg05307752 | ARHGAP15                 | 0.000148457 | 0.47991245  |
| cg08832906 | CLEC2L                   | 0.000290372 | 0.47988183  |
| cg07543626 | NOVA1;NOVA1;NOVA1        | 0.005897668 | 0.479843958 |
| cg01060861 | MKX                      | 3.34E-05    | 0.479733202 |
| cg07402669 | APCDD1L                  | 1.96E-05    | 0.479681847 |
| cg21929943 |                          | 8.60E-06    | 0.479665838 |
| cg03429643 | MGAT4A;MGAT4A            | 9.24E-05    | 0.479626661 |
| cg08272731 | LHX8                     | 7.23E-05    | 0.479612733 |
| cg17299899 |                          | 1.11E-05    | 0.4796045   |
| cg26630231 |                          | 2.58E-05    | 0.479567453 |
| cg13591352 | ABCG5                    | 1.96E-05    | 0.479551217 |

|            |                                     |             |             |
|------------|-------------------------------------|-------------|-------------|
| cg22874858 | PDE11A;PDE11A                       | 1.50E-05    | 0.47951746  |
| cg03450948 | HOXD1                               | 8.60E-06    | 0.479482485 |
| cg08376141 | PRRT1                               | 3.34E-05    | 0.479406005 |
| cg10469329 | MFAP3L                              | 0.000117986 | 0.479399559 |
| cg00735667 |                                     | 1.18E-05    | 0.479369327 |
| cg24384244 | ZNF662;ZNF662;ZNF662                | 0.000357885 | 0.479350651 |
| cg26564040 | PTGS2                               | 3.21E-05    | 0.479322068 |
| cg03167496 | BDNF;BDNF;BDNF;BDNF                 | 8.60E-06    | 0.479318072 |
| cg20443778 | LRP1B                               | 9.24E-05    | 0.479303822 |
| cg16675507 |                                     | 3.34E-05    | 0.479280027 |
| cg19178853 | NBLA00301;HAND2                     | 3.34E-05    | 0.479249248 |
| cg09417809 |                                     | 8.60E-06    | 0.479247671 |
| cg18471993 |                                     | 1.11E-05    | 0.479189457 |
| cg13453374 |                                     | 9.24E-05    | 0.479181403 |
| cg16562959 |                                     | 0.000117986 | 0.479176769 |
| cg00017489 | DPP6                                | 4.34E-05    | 0.479146575 |
| cg21468929 | EMX2OS                              | 1.50E-05    | 0.479110884 |
| cg21678312 | PTPRR                               | 9.24E-05    | 0.479038937 |
| cg11795854 |                                     | 3.34E-05    | 0.47903237  |
| cg23697855 |                                     | 8.60E-06    | 0.479001748 |
| cg07537734 | PDGFC                               | 3.34E-05    | 0.478991132 |
| cg09334277 |                                     | 1.11E-05    | 0.478982299 |
| cg23564700 | EPB41L3                             | 5.59E-05    | 0.478954047 |
| cg12951849 | FAM38B                              | 1.96E-05    | 0.478953045 |
| cg24456002 |                                     | 4.34E-05    | 0.478928183 |
| cg08961408 | NPNT                                | 3.34E-05    | 0.478922701 |
| cg03109827 | TCERG1L                             | 8.60E-06    | 0.478921372 |
| cg22637867 | ZNF709                              | 1.60E-05    | 0.478899212 |
| cg16856286 | HOXC13                              | 4.34E-05    | 0.478851852 |
| cg03298319 |                                     | 3.34E-05    | 0.478842902 |
| cg14428146 | NKX2-6                              | 2.58E-05    | 0.478810189 |
| cg22095604 | NOL4;NOL4                           | 1.96E-05    | 0.478736156 |
| cg05501996 |                                     | 2.58E-05    | 0.478730105 |
| cg24933645 | SLC30A10                            | 1.50E-05    | 0.478723791 |
| cg10761315 | ASPG                                | 5.59E-05    | 0.478720982 |
| cg16020747 | RALYL;RALYL;RALYL                   | 2.58E-05    | 0.478697235 |
| cg22496809 | TBX18                               | 8.60E-06    | 0.478694912 |
| cg18441661 | VGLL2;VGLL2                         | 2.58E-05    | 0.478657608 |
| cg17861230 | PDE4C                               | 1.96E-05    | 0.478635652 |
| cg06926782 | NRG1;NRG1;NRG1;NRG1;NRG1;NRG1;NRG1; | 5.59E-05    | 0.478626014 |
| cg06554120 | CTNND2                              | 1.96E-05    | 0.478584877 |
| cg18764577 | LAMA1;LAMA1                         | 8.60E-06    | 0.478558357 |
| cg09411719 |                                     | 1.96E-05    | 0.478546765 |
| cg07540103 | FBXO39                              | 9.24E-05    | 0.478538527 |
| cg11499681 | DNAH9                               | 8.60E-06    | 0.478533855 |
| cg16762030 |                                     | 3.34E-05    | 0.478484681 |
| cg19536810 | LRIG3;LRIG3                         | 8.60E-06    | 0.478482275 |
| cg16118212 | EFEMP1;EFEMP1;EFEMP1                | 9.24E-05    | 0.478471302 |
| cg17816908 | SFRP1                               | 8.60E-06    | 0.478464108 |
| cg01354961 | NXPH1                               | 1.18E-05    | 0.478424501 |
| cg24909548 |                                     | 1.96E-05    | 0.478363539 |
| cg16617910 | CALCR;CALCR                         | 1.11E-05    | 0.478343954 |
| cg16170614 | SOD3                                | 1.50E-05    | 0.478338272 |
| cg16764274 | SGPP2                               | 2.58E-05    | 0.478324179 |
| cg13073773 | GSC                                 | 0.000187194 | 0.478212689 |
| cg13836627 | TJP1;TJP1                           | 3.34E-05    | 0.478212125 |
| cg27003782 | CPXM2;CPXM2                         | 2.58E-05    | 0.478201586 |
| cg12009023 | EDNRA;EDNRA;EDNRA;EDNRA;EDNRA       | 1.50E-05    | 0.478195567 |
| cg19717586 | NTM;NTM;NTM;NTM;NTM;NTM;NTM         | 3.34E-05    | 0.478179052 |
| cg15260721 | GULP1                               | 2.58E-05    | 0.478175657 |

|            |                                      |             |             |
|------------|--------------------------------------|-------------|-------------|
| cg07544187 | CILP2                                | 2.58E-05    | 0.478118845 |
| cg20916066 | NKX2-1;NKX2-1                        | 1.50E-05    | 0.478095172 |
| cg26685735 | COL4A3;COL4A4;COL4A3;COL4A4;COL4A3;C | 2.58E-05    | 0.47806618  |
| cg21493633 | TLL1                                 | 1.11E-05    | 0.477999171 |
| cg17973164 | BRUNOL4;BRUNOL4;BRUNOL4;BRUNOL4      | 1.96E-05    | 0.477989275 |
| cg10333808 | ST8SIA1;ST8SIA1                      | 3.34E-05    | 0.477981193 |
| cg01663018 |                                      | 6.94E-05    | 0.477964572 |
| cg26542254 | MAGI2                                | 8.60E-06    | 0.477961695 |
| cg08890418 | KIF17;KIF17                          | 0.000290372 | 0.477949886 |
| cg06030535 |                                      | 0.000290372 | 0.477948575 |
| cg04812475 |                                      | 1.96E-05    | 0.477936825 |
| cg15562220 | SCGN                                 | 1.50E-05    | 0.47793195  |
| cg10690440 |                                      | 3.34E-05    | 0.477921424 |
| cg12947833 | HSPB2;CRYAB;HSPB2                    | 1.50E-05    | 0.477905695 |
| cg12373617 | KCNN2;KCNN2                          | 2.58E-05    | 0.477891224 |
| cg21193143 | PPFIA2                               | 1.11E-05    | 0.477885962 |
| cg13633270 |                                      | 8.60E-06    | 0.477880323 |
| cg05127369 | NR2F2;NR2F2;NR2F2;NR2F2;MIR1469      | 8.60E-06    | 0.477861937 |
| cg12122597 | KCNA4                                | 5.11E-05    | 0.477857052 |
| cg25832771 | MSC                                  | 2.58E-05    | 0.477834157 |
| cg00745389 |                                      | 8.60E-06    | 0.477815012 |
| cg21700332 | STEAP2;STEAP2                        | 8.60E-06    | 0.477764071 |
| cg11630554 | TRIM61;C4orf39;C4orf39               | 8.60E-06    | 0.477761537 |
| cg07243366 |                                      | 1.11E-05    | 0.477721972 |
| cg09554951 | KCNQ1DN                              | 8.60E-06    | 0.477675862 |
| cg13062455 | SEL1L                                | 2.58E-05    | 0.477636534 |
| cg08975922 |                                      | 8.60E-06    | 0.477619124 |
| cg02825373 |                                      | 1.11E-05    | 0.477581836 |
| cg17509220 | CACNA1A;CACNA1A                      | 1.50E-05    | 0.477579841 |
| cg09405169 | PPARG;PPARG;PPARG                    | 7.23E-05    | 0.477550008 |
| cg16238815 |                                      | 4.34E-05    | 0.47748281  |
| cg14750948 | ZIC1                                 | 4.34E-05    | 0.477471377 |
| cg27583690 | NKX6-2                               | 1.11E-05    | 0.477386509 |
| cg15839219 | PCDH20                               | 1.50E-05    | 0.47736067  |
| cg07553626 | LPAR3                                | 2.58E-05    | 0.477295869 |
| cg12206199 | LOC375196;LOC100271715               | 8.60E-06    | 0.477279211 |
| cg21034023 | UGGT2                                | 3.34E-05    | 0.477243177 |
| cg15814504 |                                      | 1.50E-05    | 0.477236213 |
| cg20776240 | ADAMTS19                             | 1.60E-05    | 0.477231105 |
| cg26990587 | ACTL6B                               | 8.60E-06    | 0.477219963 |
| cg10541864 | HAND2;NBLA00301;HAND2                | 8.60E-06    | 0.477184321 |
| cg22344611 | MYOD1                                | 0.000117986 | 0.477178784 |
| cg13566610 | RELN;RELN                            | 1.50E-05    | 0.477164452 |
| cg24604013 | SOX1                                 | 5.59E-05    | 0.477123536 |
| cg25643118 | ELOVL4                               | 1.50E-05    | 0.477117271 |
| cg07541744 | IRX6                                 | 1.96E-05    | 0.477091111 |
| cg27088072 |                                      | 8.60E-06    | 0.477088567 |
| cg14179908 | PNPLA3;PNPLA3                        | 7.23E-05    | 0.477042327 |
| cg09252495 |                                      | 7.23E-05    | 0.477042088 |
| cg16226866 |                                      | 0.000187194 | 0.47696973  |
| cg04739647 | HOXD9;HOXD9                          | 1.50E-05    | 0.476903881 |
| cg03783062 | C7orf63;C7orf63                      | 0.000233422 | 0.476874287 |
| cg06719900 | C11orf87;C11orf87                    | 2.58E-05    | 0.476871791 |
| cg03320372 | LOC100192378                         | 1.11E-05    | 0.476856432 |
| cg26282384 | PCDHGA4;PCDHGA6;PCDHGA1;PCDHGA5;PC   | 1.11E-05    | 0.476822191 |
| cg08393317 | CACNG7                               | 1.11E-05    | 0.47681598  |
| cg08551725 | SCRN1;SCRN1;SCRN1;SCRN1              | 7.23E-05    | 0.476800251 |
| cg14176930 |                                      | 8.60E-06    | 0.476754693 |
| cg15621260 | FIBIN;FIBIN                          | 8.60E-06    | 0.476721462 |
| cg23346462 | PEX5L                                | 1.50E-05    | 0.476715558 |

|            |                                     |             |             |
|------------|-------------------------------------|-------------|-------------|
| cg03758150 | ZNF536                              | 0.000122184 | 0.476706456 |
| cg13298841 | HECW1                               | 8.60E-06    | 0.476703625 |
| cg09016242 | SALL1;SALL1                         | 0.000357885 | 0.476676811 |
| cg12040830 | NCAM1;NCAM1;NCAM1                   | 0.000117986 | 0.476654457 |
| cg01894498 |                                     | 1.50E-05    | 0.476617364 |
| cg12868067 | TMEM132C                            | 0.000117986 | 0.476563574 |
| cg03239178 |                                     | 2.58E-05    | 0.4765475   |
| cg06085994 | PPFIA2                              | 8.60E-06    | 0.476544347 |
| cg01301382 |                                     | 2.58E-05    | 0.476530763 |
| cg03685886 |                                     | 3.34E-05    | 0.476516013 |
| cg02741554 | CXCL2                               | 0.000233422 | 0.476500047 |
| cg13652336 | PREX2;PREX2                         | 8.60E-06    | 0.476482024 |
| cg27513574 | SLC34A2;SLC34A2                     | 7.23E-05    | 0.476431515 |
| cg09557387 | CR1L                                | 0.000357885 | 0.476427837 |
| cg05991454 |                                     | 7.23E-05    | 0.476415072 |
| cg19423622 | PTPRN2;PTPRN2;PTPRN2                | 1.50E-05    | 0.476368785 |
| cg25509174 | PCOLCE2                             | 9.24E-05    | 0.47636037  |
| cg19313043 | NGF                                 | 2.58E-05    | 0.476341185 |
| cg03547745 | SOX9;SOX9                           | 7.23E-05    | 0.476339525 |
| cg16434657 |                                     | 3.34E-05    | 0.476337221 |
| cg12687157 | MARVELD2;MARVELD2                   | 1.96E-05    | 0.476324647 |
| cg01181415 | LMO3;LMO3                           | 8.60E-06    | 0.476311307 |
| cg23433370 | STK38L                              | 0.000148457 | 0.476310853 |
| cg09712306 | AURKA;AURKA;AURKA;AURKA;AURKA;AURKA | 0.000537905 | 0.476304346 |
| cg13482432 | FOXB2                               | 2.58E-05    | 0.476287229 |
| cg20442599 |                                     | 8.60E-06    | 0.476286185 |
| cg06906472 | ST6GAL2;ST6GAL2;ST6GAL2             | 1.11E-05    | 0.476284848 |
| cg25617092 | GRID2                               | 1.96E-05    | 0.476284706 |
| cg04304705 | FAM19A5                             | 8.60E-06    | 0.476275495 |
| cg05376374 | MIR129-2                            | 4.90E-05    | 0.476269147 |
| cg06374079 |                                     | 0.000357885 | 0.476232772 |
| cg08003628 | ZFPM2                               | 7.23E-05    | 0.476225644 |
| cg22702328 | CA10;CA10;CA10;CA10                 | 8.60E-06    | 0.476218869 |
| cg22784954 | ADAMTS16                            | 3.34E-05    | 0.476177204 |
| cg20711639 |                                     | 1.11E-05    | 0.476136558 |
| cg27436118 | MGRN1;MGRN1;MGRN1;MGRN1             | 3.34E-05    | 0.476035029 |
| cg26568762 |                                     | 9.24E-05    | 0.476000766 |
| cg07365816 | SGEF                                | 3.34E-05    | 0.476000409 |
| cg14094983 | NXPH1                               | 1.11E-05    | 0.475990244 |
| cg26091021 |                                     | 3.34E-05    | 0.475951673 |
| cg19343464 | GRIA4;GRIA4;GRIA4;GRIA4;GRIA4       | 3.34E-05    | 0.475947986 |
| cg21583850 | KCND3;KCND3                         | 0.000148457 | 0.475936528 |
| cg27591502 | DOCK2;FAM196B                       | 2.58E-05    | 0.475923709 |
| cg05403555 | TACR1;TACR1                         | 0.000117986 | 0.475902504 |
| cg25916711 | NKX2-5;NKX2-5;NKX2-5                | 8.60E-06    | 0.475876356 |
| cg16049690 | BTNL9                               | 4.34E-05    | 0.475860347 |
| cg14711366 | TMED9                               | 0.000117986 | 0.475834602 |
| cg04585378 | CASR                                | 1.11E-05    | 0.475832872 |
| cg02266771 | PRSS16                              | 1.50E-05    | 0.475816524 |
| cg01799671 | CMIP;CMIP                           | 4.34E-05    | 0.475812457 |
| cg10088985 | CXCL5;CXCL5                         | 1.11E-05    | 0.475809021 |
| cg16355785 | GABRA1;GABRA1;GABRA1;GABRA1;GABRA1  | 1.50E-05    | 0.475776446 |
| cg00516513 |                                     | 3.34E-05    | 0.475759472 |
| cg08448589 |                                     | 8.60E-06    | 0.47560705  |
| cg24144083 |                                     | 3.34E-05    | 0.475595912 |
| cg15603568 | GRIA4;GRIA4;GRIA4;GRIA4             | 7.23E-05    | 0.475590665 |
| cg25287257 | MNX1;MNX1                           | 2.58E-05    | 0.475547644 |
| cg11068946 | NKX6-2                              | 8.60E-06    | 0.475530135 |
| cg13721404 | NOL4                                | 4.34E-05    | 0.475522059 |
| cg04652961 | GJA1                                | 1.96E-05    | 0.475521904 |

|            |                                      |             |             |
|------------|--------------------------------------|-------------|-------------|
| cg21534423 |                                      | 1.96E-05    | 0.475471423 |
| cg18009496 | IRX4                                 | 3.34E-05    | 0.47546532  |
| cg15638709 |                                      | 2.58E-05    | 0.475451059 |
| cg05446629 | B3GAT1;B3GAT1;B3GAT1;B3GAT1          | 0.000334462 | 0.475365912 |
| cg03792162 |                                      | 1.50E-05    | 0.475324534 |
| cg02436788 | TEKT3                                | 1.18E-05    | 0.475283994 |
| cg16924337 | RGS17                                | 5.59E-05    | 0.475262534 |
| cg13239420 |                                      | 1.96E-05    | 0.475256477 |
| cg02662277 | PHYHIPL;PHYHIPL;PHYHIPL              | 1.96E-05    | 0.475235337 |
| cg24081819 | EPHX2                                | 1.50E-05    | 0.47522237  |
| cg07797397 | HOXD1                                | 1.50E-05    | 0.475205048 |
| cg14103680 |                                      | 5.59E-05    | 0.475201454 |
| cg07005778 |                                      | 1.11E-05    | 0.475161476 |
| cg21133153 |                                      | 8.60E-06    | 0.475143338 |
| cg03753331 | DPP10;DPP10                          | 7.23E-05    | 0.475139795 |
| cg16524049 | LMX1A                                | 1.96E-05    | 0.47512698  |
| cg04723401 |                                      | 8.60E-06    | 0.47512416  |
| cg20675505 | MSC                                  | 8.60E-06    | 0.475112853 |
| cg25912827 | DPP4;DPP4                            | 0.000357885 | 0.475074425 |
| cg14338425 | MAL2                                 | 1.50E-05    | 0.475042237 |
| cg24114014 |                                      | 4.34E-05    | 0.475034871 |
| cg06896909 | TMEM196                              | 8.60E-06    | 0.475029388 |
| cg14506196 | NKX2-3                               | 4.34E-05    | 0.475003173 |
| cg15679813 | PHF21B;PHF21B                        | 4.34E-05    | 0.474994833 |
| cg00910695 | RSPO2;RSPO2                          | 2.58E-05    | 0.474989647 |
| cg21800232 | ANKRD34B                             | 1.50E-05    | 0.474952656 |
| cg06994420 | MEIS1                                | 0.000117986 | 0.47491685  |
| cg16196211 |                                      | 8.60E-06    | 0.474910276 |
| cg14454680 | C3orf26;FILIP1L;FILIP1L              | 0.000233422 | 0.474866939 |
| cg02866106 | CHRM2;CHRM2;CHRM2;CHRM2;CHRM2;CHR    | 8.60E-06    | 0.474829656 |
| cg13125157 | CA10;CA10;CA10                       | 2.58E-05    | 0.474793661 |
| cg01030121 | LOC283392;TRHDE;LOC283392            | 8.60E-06    | 0.474786748 |
| cg26151467 | SOX1;SOX1                            | 5.59E-05    | 0.474783778 |
| cg02630214 |                                      | 8.60E-06    | 0.474763635 |
| cg10146199 | GLRB;GLRB;GLRB                       | 1.50E-05    | 0.474743528 |
| cg17110586 |                                      | 8.60E-06    | 0.474739929 |
| cg23948240 |                                      | 8.60E-06    | 0.474721066 |
| cg16521917 | CNTNAP2;CNTNAP2                      | 2.58E-05    | 0.474709767 |
| cg14393469 | STEAP2;STEAP2                        | 3.34E-05    | 0.474706728 |
| cg25482900 | FBLL1                                | 3.34E-05    | 0.474685051 |
| cg13396713 | VPS53;VPS53                          | 4.34E-05    | 0.474595166 |
| cg06226567 | C20orf56                             | 0.000290372 | 0.47454455  |
| cg24198558 | TMEM108;TMEM108                      | 4.34E-05    | 0.474535067 |
| cg11907729 | HMGCLL1;HMGCLL1                      | 2.58E-05    | 0.474505561 |
| cg05380019 |                                      | 1.11E-05    | 0.474488289 |
| cg26065057 | GALR1                                | 7.23E-05    | 0.474483779 |
| cg23331421 | ZNF536                               | 1.96E-05    | 0.474470144 |
| cg18465694 |                                      | 8.60E-06    | 0.474455534 |
| cg01546568 | CTNNA2;CTNNA2;CTNNA2;CTNNA2          | 1.18E-05    | 0.474449972 |
| cg03589296 | MEIS1                                | 8.60E-06    | 0.474387139 |
| cg06966811 | OTX2                                 | 2.58E-05    | 0.474344147 |
| cg07095997 | SIX4                                 | 1.60E-05    | 0.474325389 |
| cg22639011 | KCNA4                                | 8.60E-06    | 0.474307543 |
| cg23380558 | GPR123                               | 0.000148457 | 0.474283816 |
| cg17222500 | SLC6A15;SLC6A15;SLC6A15              | 1.50E-05    | 0.474275793 |
| cg04324308 | COL4A3;COL4A4;COL4A3;COL4A4;COL4A3;C | 3.34E-05    | 0.474255582 |
| cg12821278 | DBC1                                 | 1.96E-05    | 0.474227369 |
| cg03450844 | GIMAP1                               | 1.96E-05    | 0.474198691 |
| cg19632594 | FBXL7                                | 8.60E-06    | 0.474188055 |
| cg23514324 | PPARG;PPARG;PPARG                    | 4.34E-05    | 0.474187902 |

|            |                                    |             |             |
|------------|------------------------------------|-------------|-------------|
| cg03287574 |                                    | 8.60E-06    | 0.474185163 |
| cg01236063 |                                    | 8.60E-06    | 0.474175841 |
| cg16655338 | RIMS1                              | 1.50E-05    | 0.474167949 |
| cg01851378 |                                    | 8.60E-06    | 0.474142501 |
| cg24886267 | FBLL1                              | 1.18E-05    | 0.474130831 |
| cg05381746 | MKX                                | 1.11E-05    | 0.474125901 |
| cg21699044 |                                    | 1.96E-05    | 0.474107299 |
| cg06497848 | VAX1;VAX1                          | 1.50E-05    | 0.474096409 |
| cg22216413 | ANO3                               | 1.96E-05    | 0.47409396  |
| cg23169957 | MACROD2                            | 4.34E-05    | 0.474082935 |
| cg26870460 | ZNF215;ZNF215                      | 3.34E-05    | 0.474048046 |
| cg07295678 | DPYSL4                             | 1.50E-05    | 0.473928209 |
| cg06580551 | ZNF662;ZNF662;ZNF662               | 2.58E-05    | 0.47391804  |
| cg22235018 | TFAP2D                             | 1.11E-05    | 0.47391489  |
| cg00904966 | LOC146336                          | 0.000791389 | 0.473834803 |
| cg07135032 | LMX1A                              | 5.59E-05    | 0.47378704  |
| cg16398329 | FGF14                              | 0.000955793 | 0.473730808 |
| cg17039236 |                                    | 3.34E-05    | 0.473711547 |
| cg17380661 | SIM1                               | 1.96E-05    | 0.473691565 |
| cg02004851 | PCDHA2;PCDHA1;PCDHA1;PCDHA6;PCDHA5 | 0.000148457 | 0.473677774 |
| cg05224741 |                                    | 4.34E-05    | 0.473659749 |
| cg10755058 | ENTPD3;ENTPD3                      | 1.96E-05    | 0.47363379  |
| cg23495279 | CSMD1                              | 8.60E-06    | 0.473616565 |
| cg12636169 | ESRRG                              | 8.60E-06    | 0.473577023 |
| cg26709285 | KCNB1;KCNB1                        | 8.60E-06    | 0.473489818 |
| cg16563171 | PAX3;PAX3;PAX3;PAX3;PAX3;PAX3      | 8.60E-06    | 0.473425244 |
| cg01035689 |                                    | 8.60E-06    | 0.473412607 |
| cg26824006 |                                    | 1.11E-05    | 0.473410262 |
| cg11563680 |                                    | 3.34E-05    | 0.473397055 |
| cg04832466 |                                    | 3.34E-05    | 0.473396075 |
| cg20847110 | LOC401127                          | 1.50E-05    | 0.473356128 |
| cg15680624 | CRYBA2;CRYBA2;CRYBA2               | 0.000117986 | 0.47333341  |
| cg14752336 | SORCS3                             | 8.60E-06    | 0.473283904 |
| cg06122871 |                                    | 1.50E-05    | 0.473259296 |
| cg04993279 |                                    | 1.96E-05    | 0.47325504  |
| cg23665824 | CTNNA2;LRRTM1;CTNNA2               | 1.11E-05    | 0.473233682 |
| cg07789132 |                                    | 8.60E-06    | 0.473198678 |
| cg19988449 | BNC1                               | 8.60E-06    | 0.473147425 |
| cg18267381 | ZNF385D;ZNF385D                    | 8.60E-06    | 0.473143014 |
| cg20019019 | GPR85;GPR85;GPR85;GPR85            | 8.60E-06    | 0.473116891 |
| cg05917460 | PAX9;PAX9                          | 7.23E-05    | 0.473086603 |
| cg01969701 |                                    | 0.000187194 | 0.473013043 |
| cg02835467 | CDH7;CDH7                          | 8.60E-06    | 0.473006871 |
| cg17958423 | ZNF215                             | 8.60E-06    | 0.472974137 |
| cg17988460 | NKX6-2                             | 8.60E-06    | 0.472968793 |
| cg27638126 | MEOX2                              | 2.80E-05    | 0.472954402 |
| cg17780246 | CACNG8                             | 1.11E-05    | 0.472887295 |
| cg04330371 | NR2F2;NR2F2;NR2F2;MIR1469;NR2F2    | 1.60E-05    | 0.472885735 |
| cg21739754 | ZNF804A                            | 8.60E-06    | 0.47287061  |
| cg01844178 | CCDC39                             | 9.24E-05    | 0.472863438 |
| cg26078977 | PDE4D;PDE4D;PDE4D                  | 8.60E-06    | 0.472853356 |
| cg11686427 | PCDHGA4;PCDHGA6;PCDHGA1;PCDHGA8;PC | 3.34E-05    | 0.472767749 |
| cg15700437 | CRCT1                              | 5.59E-05    | 0.472764573 |
| cg14600824 |                                    | 8.60E-06    | 0.472724165 |
| cg09260089 | NKX6-2                             | 8.60E-06    | 0.472679996 |
| cg12682684 | EPHA5;EPHA5                        | 1.50E-05    | 0.472675982 |
| cg26557404 | MYO5B                              | 0.000148457 | 0.472628382 |
| cg09527126 |                                    | 1.96E-05    | 0.472627914 |
| cg13356896 | BOLL;BOLL                          | 1.11E-05    | 0.472581356 |
| cg15581269 |                                    | 8.60E-06    | 0.472578905 |



|            |                                    |             |             |
|------------|------------------------------------|-------------|-------------|
| cg05627639 | CHST8;CHST8                        | 4.34E-05    | 0.472568764 |
| cg19485202 | COMP;COMP                          | 1.96E-05    | 0.472559658 |
| cg18771173 | SLC5A7                             | 1.96E-05    | 0.472556797 |
| cg16848524 | KIAA1688                           | 1.50E-05    | 0.47253313  |
| cg24997896 | LOC100128811;GPR158                | 8.60E-06    | 0.472518535 |
| cg02312409 | STL                                | 0.000791389 | 0.472510993 |
| cg04825327 | C4orf31                            | 7.23E-05    | 0.472493636 |
| cg26931862 | HOXC12                             | 1.50E-05    | 0.472439334 |
| cg00708105 |                                    | 8.60E-06    | 0.472429682 |
| cg22079161 | AFAP1;AFAP1                        | 0.00043997  | 0.472429436 |
| cg00563824 |                                    | 1.96E-05    | 0.472428643 |
| cg09795809 | MGC45800                           | 5.59E-05    | 0.472410764 |
| cg04352272 |                                    | 1.96E-05    | 0.472384743 |
| cg03048654 | VAX1;VAX1                          | 9.24E-05    | 0.472363606 |
| cg14305313 |                                    | 0.000290372 | 0.472360204 |
| cg01815529 | PCSK2                              | 0.000148457 | 0.472351869 |
| cg14583871 | CLIC6                              | 1.11E-05    | 0.472312585 |
| cg10434152 | GOLSYN;GOLSYN                      | 4.34E-05    | 0.472292109 |
| cg23243267 |                                    | 3.34E-05    | 0.472290549 |
| cg18722847 | ZNF502;ZNF502;ZNF502;ZNF502        | 3.34E-05    | 0.472270675 |
| cg14874351 | LIN7A                              | 0.000435122 | 0.472259734 |
| cg14051544 | SLC7A14                            | 5.11E-05    | 0.472233834 |
| cg06246357 |                                    | 8.60E-06    | 0.472202958 |
| cg25928603 | SATB2                              | 0.000357885 | 0.472166953 |
| cg01583131 | BDNF                               | 4.34E-05    | 0.472158687 |
| cg16728539 | CACNA1C;CACNA1C;CACNA1C;CACNA1C;CA | 7.23E-05    | 0.472157699 |
| cg02090656 | SGEF                               | 1.50E-05    | 0.472122952 |
| cg07451261 |                                    | 0.000290372 | 0.472122483 |
| cg16652741 | CDK5R2                             | 9.24E-05    | 0.472075569 |
| cg15085899 | NCOR2;NCOR2                        | 0.001376172 | 0.472052636 |
| cg03065447 |                                    | 9.04E-05    | 0.47200705  |
| cg05601456 | ARSJ;ARSJ                          | 9.24E-05    | 0.472006802 |
| cg05021643 | HOXD3                              | 1.96E-05    | 0.471949956 |
| cg14002960 | NOL4                               | 2.58E-05    | 0.471948056 |
| cg20985755 | THRB;THRB;THRB                     | 0.000357885 | 0.471940115 |
| cg07432626 |                                    | 1.96E-05    | 0.471930834 |
| cg05398903 |                                    | 1.96E-05    | 0.471922001 |
| cg21389743 | CLDN11                             | 8.60E-06    | 0.471874202 |
| cg08893692 |                                    | 9.24E-05    | 0.471834139 |
| cg16948320 | HRASLS;MGC2889                     | 3.34E-05    | 0.471831663 |
| cg17482033 | ZIC1                               | 2.58E-05    | 0.471829099 |
| cg20170533 | DLEU7;DLEU7                        | 0.000148457 | 0.471820178 |
| cg06574716 | ZNF283                             | 1.96E-05    | 0.471815305 |
| cg12070159 | RGS20                              | 4.34E-05    | 0.471774901 |
| cg15563027 | APBB2;APBB2;APBB2                  | 3.34E-05    | 0.471750378 |
| cg15873149 |                                    | 1.96E-05    | 0.471722311 |
| cg12067687 | HOOK1                              | 8.60E-06    | 0.471688428 |
| cg05251676 | EGFLAM                             | 0.000233422 | 0.471682671 |
| cg10233825 | LOC100190940                       | 0.000117986 | 0.47166014  |
| cg17101296 |                                    | 1.11E-05    | 0.47163855  |
| cg12891160 | C1QL2                              | 8.60E-06    | 0.471596097 |
| cg01939453 |                                    | 3.34E-05    | 0.471587399 |
| cg18279094 | FOXD3                              | 0.000187194 | 0.471562116 |
| cg08084616 |                                    | 8.60E-06    | 0.471501398 |
| cg13834623 | SCGN                               | 8.60E-06    | 0.471492483 |
| cg27361134 | RIMS4                              | 2.58E-05    | 0.471483593 |
| cg12961607 | SFRS7                              | 0.000187194 | 0.471454737 |
| cg08229018 | PRSS12                             | 2.58E-05    | 0.471452507 |
| cg04120686 |                                    | 0.000357885 | 0.471387814 |
| cg23778149 | LOC401463                          | 2.58E-05    | 0.471273224 |

|            |                                     |             |             |
|------------|-------------------------------------|-------------|-------------|
| cg16503924 | CDH18;CDH18                         | 1.50E-05    | 0.471273131 |
| cg14231297 | ZSCAN18;ZSCAN18                     | 4.34E-05    | 0.471241766 |
| cg15987885 | NMNAT2                              | 2.58E-05    | 0.471232554 |
| cg27154343 | KCNC2;KCNC2;KCNC2;KCNC2;KCNC2;KCNC2 | 3.34E-05    | 0.471221105 |
| cg14414154 | APP;APP;APP;APP;APP                 | 3.34E-05    | 0.471207142 |
| cg12812583 |                                     | 7.23E-05    | 0.471150281 |
| cg17285225 | OXTR;OXTR                           | 3.34E-05    | 0.471141245 |
| cg11743349 | KCNIP4                              | 8.60E-06    | 0.471113918 |
| cg04395954 |                                     | 4.34E-05    | 0.471082489 |
| cg17093995 | VWC2                                | 5.11E-05    | 0.471050211 |
| cg23300368 | PREX2;PREX2                         | 1.96E-05    | 0.471041274 |
| cg19853833 | BRUNOL4;BRUNOL4;BRUNOL4;BRUNOL4     | 1.11E-05    | 0.471007597 |
| cg11389172 | SLC18A3;CHAT                        | 2.58E-05    | 0.471007162 |
| cg01642653 | BDNF;BDNF;BDNF;BDNF;BDNF            | 8.60E-06    | 0.470983002 |
| cg22548438 |                                     | 8.60E-06    | 0.470982437 |
| cg04890851 |                                     | 1.96E-05    | 0.470974785 |
| cg01492330 | KRT3                                | 7.23E-05    | 0.470923222 |
| cg27547954 |                                     | 0.000233422 | 0.470913281 |
| cg16270399 | LOC284276                           | 3.34E-05    | 0.470864922 |
| cg27486637 | WDR17;WDR17;WDR17;WDR17             | 3.34E-05    | 0.470852107 |
| cg20525183 | PHF21B;PHF21B;PHF21B                | 4.34E-05    | 0.470849968 |
| cg14520947 |                                     | 1.96E-05    | 0.470830217 |
| cg13895765 |                                     | 8.60E-06    | 0.470791443 |
| cg26348348 | LYPD1;LYPD1;LYPD1                   | 9.24E-05    | 0.470785341 |
| cg13519035 |                                     | 1.96E-05    | 0.470784878 |
| cg12807794 | TCF15                               | 8.60E-06    | 0.470756205 |
| cg23180938 | CDO1                                | 0.000148457 | 0.4707473   |
| cg20194314 |                                     | 8.60E-06    | 0.470716519 |
| cg02812207 | PRSS12                              | 8.60E-06    | 0.470653929 |
| cg17054060 |                                     | 0.000117986 | 0.470647852 |
| cg16235861 | TMEM20;TMEM20                       | 1.50E-05    | 0.470619595 |
| cg17807172 |                                     | 9.24E-05    | 0.470618169 |
| cg00343633 | GRIA4;GRIA4;GRIA4;GRIA4             | 0.000117986 | 0.470565757 |
| cg26464221 | PRR16                               | 0.000117986 | 0.470533578 |
| cg20939084 | ZIC4;ZIC4;ZIC4;ZIC4;ZIC4            | 8.60E-06    | 0.470528819 |
| cg03135351 | CLIP4                               | 5.59E-05    | 0.470491402 |
| cg14001664 |                                     | 1.11E-05    | 0.470490659 |
| cg08875948 | GRM1;GRM1                           | 2.58E-05    | 0.470484142 |
| cg14390758 | LOC100128811;GPR158                 | 8.60E-06    | 0.470480017 |
| cg09774787 | SLC6A2                              | 0.000117986 | 0.47047969  |
| cg22518696 | LPHN2                               | 0.000148457 | 0.470475139 |
| cg05968145 |                                     | 1.96E-05    | 0.470472437 |
| cg11357013 | NEO1                                | 2.58E-05    | 0.470412517 |
| cg15900248 | HOOK1                               | 2.58E-05    | 0.470287804 |
| cg05888181 | KBTBD11                             | 0.000148457 | 0.470282001 |
| cg18096962 |                                     | 1.11E-05    | 0.470272977 |
| cg24530250 | PHOX2A                              | 7.23E-05    | 0.470269486 |
| cg01537995 | FLRT2                               | 8.60E-06    | 0.470258621 |
| cg24611608 | EYA1                                | 8.60E-06    | 0.470257206 |
| cg16377609 |                                     | 1.11E-05    | 0.470249196 |
| cg04875128 | OTUD7A                              | 1.96E-05    | 0.470183321 |
| cg07629355 | IGSF9B                              | 1.11E-05    | 0.470178346 |
| cg01802258 | SLC24A4;SLC24A4;SLC24A4             | 9.24E-05    | 0.470166312 |
| cg13321967 |                                     | 8.60E-06    | 0.470163516 |
| cg03205103 | EGFLAM                              | 2.58E-05    | 0.470154322 |
| cg06849504 |                                     | 1.50E-05    | 0.470096345 |
| cg25278941 |                                     | 0.000117986 | 0.470064868 |
| cg01995480 | PHF21B;PHF21B                       | 1.11E-05    | 0.470048242 |
| cg22600043 | RSPO2                               | 2.58E-05    | 0.470029466 |
| cg23032674 | COL9A1;COL9A1                       | 1.50E-05    | 0.470026722 |

|            |                                    |             |             |
|------------|------------------------------------|-------------|-------------|
| cg14583675 | ABCG5                              | 5.59E-05    | 0.470024991 |
| cg08382774 | NKX6-2                             | 1.50E-05    | 0.469953373 |
| cg23982858 | USP44;USP44                        | 1.11E-05    | 0.469943724 |
| cg17916490 | NTSR2                              | 5.59E-05    | 0.469940945 |
| cg00212988 | GPR120                             | 9.24E-05    | 0.469897882 |
| cg03679755 |                                    | 3.34E-05    | 0.469897418 |
| cg24683222 |                                    | 4.34E-05    | 0.469869502 |
| cg25739043 |                                    | 1.50E-05    | 0.469868526 |
| cg17585615 | C21orf29                           | 7.23E-05    | 0.469859864 |
| cg07162198 | SLC2A10                            | 3.34E-05    | 0.469780119 |
| cg05165940 |                                    | 8.60E-06    | 0.469775208 |
| cg06610484 | MCHR2;MCHR2;MCHR2                  | 1.50E-05    | 0.469695504 |
| cg04894619 | PEX5L                              | 8.60E-06    | 0.46962234  |
| cg26777729 | SGEF                               | 3.34E-05    | 0.469527554 |
| cg15720995 | TMTC1                              | 8.60E-06    | 0.469525366 |
| cg12363722 | MTNR1A                             | 8.60E-06    | 0.469506364 |
| cg23001131 |                                    | 4.34E-05    | 0.469495739 |
| cg11893763 | GPR26                              | 8.60E-06    | 0.469463437 |
| cg25861340 | SLC9A3                             | 7.23E-05    | 0.469456057 |
| cg26565021 | CHST8;CHST8                        | 4.34E-05    | 0.469434318 |
| cg12816961 | NKX6-2                             | 1.11E-05    | 0.469399362 |
| cg17326555 |                                    | 4.34E-05    | 0.469374111 |
| cg03740167 |                                    | 8.60E-06    | 0.469318541 |
| cg09788416 |                                    | 9.24E-05    | 0.46931528  |
| cg25260137 |                                    | 2.58E-05    | 0.469237614 |
| cg18789663 | PLD5                               | 4.34E-05    | 0.469167025 |
| cg12936121 |                                    | 8.60E-06    | 0.46915208  |
| cg25837803 | PTGS2                              | 3.34E-05    | 0.469117087 |
| cg00824141 | FHL2;FHL2;FHL2;FHL2;FHL2;FHL2;FHL2 | 0.000148457 | 0.4691151   |
| cg09068528 | ACADL;ACADL                        | 1.50E-05    | 0.469092271 |
| cg26861946 | CDH6;CDH6                          | 3.34E-05    | 0.469084321 |
| cg13545212 | SLC13A5;SLC13A5                    | 5.59E-05    | 0.468961611 |
| cg06850283 | FGF10                              | 5.59E-05    | 0.468960978 |
| cg10386483 | GJD2                               | 2.58E-05    | 0.468949655 |
| cg14146100 | PCDH10;PCDH10                      | 1.11E-05    | 0.4688234   |
| cg10784386 | THBS4                              | 2.58E-05    | 0.468782747 |
| cg26705953 | PLA2G7;PLA2G7;PLA2G7               | 1.96E-05    | 0.468770204 |
| cg06746118 |                                    | 4.34E-05    | 0.468768869 |
| cg18161374 | BRUNOL4;BRUNOL4;BRUNOL4;BRUNOL4    | 8.60E-06    | 0.468755021 |
| cg15843567 | MYO3A;MYO3A                        | 7.23E-05    | 0.468748021 |
| cg23632875 | TCERG1L                            | 2.58E-05    | 0.468717975 |
| cg24496223 |                                    | 3.34E-05    | 0.468704282 |
| cg01832737 | PDE10A;PDE10A                      | 2.58E-05    | 0.468691958 |
| cg10838091 | EPHA8;EPHA8                        | 8.60E-06    | 0.468683809 |
| cg07472373 | DRGX                               | 5.59E-05    | 0.468660363 |
| cg11439592 | SASH1                              | 8.60E-06    | 0.468658174 |
| cg14516183 | SEC22A                             | 4.34E-05    | 0.46865133  |
| cg13437581 |                                    | 1.50E-05    | 0.468640318 |
| cg23833452 | RAB32                              | 9.24E-05    | 0.468568818 |
| cg00233079 | SGMS2                              | 2.58E-05    | 0.46856601  |
| cg12294121 | GABRB1;GABRB1                      | 1.11E-05    | 0.468562542 |
| cg11332236 | RHCG                               | 3.34E-05    | 0.468549721 |
| cg02925601 |                                    | 2.58E-05    | 0.468515297 |
| cg06507579 |                                    | 7.23E-05    | 0.468511596 |
| cg23771603 | MYO3A                              | 7.23E-05    | 0.468502607 |
| cg15511738 | CELSR3                             | 3.34E-05    | 0.46848993  |
| cg21308575 | EMR1                               | 0.000187194 | 0.468461653 |
| cg07893584 | PTPRD;PTPRD;PTPRD                  | 3.34E-05    | 0.468453574 |
| cg16426537 | PTPN5;PTPN5;PTPN5                  | 1.50E-05    | 0.468392324 |
| cg18953784 |                                    | 1.96E-05    | 0.468340885 |

|            |                                                 |             |             |
|------------|-------------------------------------------------|-------------|-------------|
| cg02983950 |                                                 | 0.000148457 | 0.468310828 |
| cg12917718 | KLHL1;KLHL1;ATXN8OS                             | 8.60E-06    | 0.468284161 |
| cg18438777 | NPY5R                                           | 8.60E-06    | 0.468255225 |
| cg06160853 |                                                 | 0.000357885 | 0.468227167 |
| cg17001566 | PRDM16;PRDM16                                   | 1.96E-05    | 0.468221771 |
| cg18150439 | NXPH2                                           | 1.11E-05    | 0.468189751 |
| cg22857085 |                                                 | 8.60E-06    | 0.468165833 |
| cg11931596 | IL7                                             | 8.60E-06    | 0.468121492 |
| cg03530754 | TMEM132C                                        | 4.34E-05    | 0.468101803 |
| cg11400953 | HPSE2;HPSE2;HPSE2;HPSE2                         | 0.000187194 | 0.468094788 |
| cg01168865 | SLC25A21;SLC25A21;LOC100129794                  | 1.50E-05    | 0.46807318  |
| cg03365733 | PRDM13                                          | 8.60E-06    | 0.468060935 |
| cg03430846 | NRG1                                            | 8.60E-06    | 0.468043676 |
| cg11229543 | PRDM16;PRDM16;FLJ42875;FLJ42875                 | 3.34E-05    | 0.467999986 |
| cg12769506 |                                                 | 0.00045851  | 0.467972367 |
| cg01625087 |                                                 | 1.50E-05    | 0.467959411 |
| cg27131891 |                                                 | 0.000148457 | 0.467932375 |
| cg22264930 | TEKT3                                           | 8.60E-06    | 0.467928398 |
| cg03354340 | MARVELD3;MARVELD3                               | 1.96E-05    | 0.467918391 |
| cg12628659 | ANKRD34C                                        | 1.96E-05    | 0.467912744 |
| cg16318053 | ISL1;ISL1                                       | 2.58E-05    | 0.467899172 |
| cg06671842 | PTPN5;PTPN5;PTPN5                               | 7.23E-05    | 0.467893016 |
| cg10512745 | DMRTA2                                          | 0.000117986 | 0.467876603 |
| cg07489048 | FOXG1                                           | 1.50E-05    | 0.467800398 |
| cg10387551 | KCNA4                                           | 7.23E-05    | 0.467793825 |
| cg26467069 | RND3                                            | 4.34E-05    | 0.467760167 |
| cg20453394 |                                                 | 2.58E-05    | 0.467679526 |
| cg14997413 | COBL                                            | 1.50E-05    | 0.467660042 |
| cg13897348 | MIB2;MIB2;MIB2;MIB2;MIB2                        | 0.000233422 | 0.467659384 |
| cg01615704 | MALL;MALL                                       | 3.34E-05    | 0.467636869 |
| cg12379383 |                                                 | 8.60E-06    | 0.467609311 |
| cg25633678 |                                                 | 0.000148457 | 0.467581813 |
| cg10303487 | DPYS                                            | 1.11E-05    | 0.467567756 |
| cg13929328 | FOXI2                                           | 1.50E-05    | 0.467535451 |
| cg27210464 |                                                 | 1.96E-05    | 0.467515922 |
| cg04674315 |                                                 | 1.96E-05    | 0.467515267 |
| cg17534009 |                                                 | 1.11E-05    | 0.467504636 |
| cg19389293 | C18orf1;C18orf1;C18orf1;C18orf1;C18orf1;C18orf1 | 1.96E-05    | 0.467442954 |
| cg08055910 | FAM149A                                         | 0.0050758   | 0.467431939 |
| cg12946880 | MAGI1;MAGI1;MAGI1                               | 3.34E-05    | 0.467427358 |
| cg03650674 | GRHL2                                           | 7.23E-05    | 0.467424391 |
| cg27360326 | PCDH8;PCDH8;PCDH8;PCDH8                         | 0.000117986 | 0.467416973 |
| cg17052813 | GPR37                                           | 1.50E-05    | 0.467412501 |
| cg19230755 |                                                 | 1.50E-05    | 0.467288359 |
| cg11254053 | AK2;AK2                                         | 1.11E-05    | 0.467239379 |
| cg15179725 | BRUNOL4;BRUNOL4;BRUNOL4;BRUNOL4                 | 3.34E-05    | 0.467238362 |
| cg01382864 | PTPRN                                           | 1.11E-05    | 0.467235067 |
| cg18044663 | GFRA1;GFRA1;GFRA1                               | 0.001147425 | 0.467220005 |
| cg01023672 |                                                 | 0.000117986 | 0.467209709 |
| cg27443071 |                                                 | 7.23E-05    | 0.467166401 |
| cg25684999 | PTF1A                                           | 8.60E-06    | 0.467156752 |
| cg05539745 | HCN1                                            | 1.11E-05    | 0.467118971 |
| cg20193324 | SHISA2                                          | 0.000357885 | 0.467110768 |
| cg06510438 | FAM38B                                          | 1.96E-05    | 0.467098059 |
| cg13437164 | EPHA8;EPHA8;EPHA8;EPHA8                         | 3.34E-05    | 0.467061799 |
| cg14530834 |                                                 | 3.34E-05    | 0.467047202 |
| cg26084529 | LRAT                                            | 3.34E-05    | 0.467045485 |
| cg26131286 |                                                 | 8.60E-06    | 0.467021258 |
| cg13509195 | CPNE8                                           | 0.001376172 | 0.467016029 |
| cg08460732 |                                                 | 2.58E-05    | 0.467012358 |

|            |                                    |             |             |
|------------|------------------------------------|-------------|-------------|
| cg12453014 | PRR16                              | 0.000187194 | 0.466994734 |
| cg18588768 | FAM155A                            | 1.11E-05    | 0.466987103 |
| cg03967627 | C8orf73                            | 3.34E-05    | 0.466957059 |
| cg23242697 |                                    | 0.000117986 | 0.466940453 |
| cg24495585 |                                    | 3.34E-05    | 0.466939529 |
| cg26170805 |                                    | 1.50E-05    | 0.466936122 |
| cg04830357 | PCDHGA1;PCDHGA2;PCDHGA2            | 2.58E-05    | 0.466935336 |
| cg14134497 | DTNA;DTNA;DTNA                     | 1.96E-05    | 0.466915112 |
| cg08370996 | NR2F2;NR2F2                        | 1.11E-05    | 0.466910741 |
| cg17078116 | NEFM;NEFM                          | 7.23E-05    | 0.466891355 |
| cg23713724 | KCNIP4;KCNIP4;KCNIP4;KCNIP4        | 9.24E-05    | 0.46684384  |
| cg10074727 | GCM2                               | 4.34E-05    | 0.466797144 |
| cg12475759 | AJAP1;AJAP1                        | 4.34E-05    | 0.466796145 |
| cg26272220 | ACSS3;ACSS3                        | 1.50E-05    | 0.466760619 |
| cg12693702 | MIR148A                            | 0.000148457 | 0.466743607 |
| cg04597433 | DRD5                               | 9.24E-05    | 0.466740913 |
| cg23030863 | JAM3                               | 4.34E-05    | 0.466729111 |
| cg21714266 | GRM1;GRM1                          | 7.23E-05    | 0.466692971 |
| cg03573068 | SLC6A5                             | 2.58E-05    | 0.466673926 |
| cg06410537 | TLX3                               | 8.60E-06    | 0.466654191 |
| cg03152033 |                                    | 3.21E-05    | 0.466652044 |
| cg11357746 | TBX5;TBX5;TBX5;TBX5                | 0.000117986 | 0.466643821 |
| cg00962913 | FAM163A                            | 1.96E-05    | 0.466621037 |
| cg05230054 | CHST8;CHST8;CHST8                  | 3.34E-05    | 0.466614582 |
| cg13872688 | ROR1;ROR1                          | 0.000205664 | 0.466600946 |
| cg19908577 | UGT8                               | 1.96E-05    | 0.466594506 |
| cg12513880 |                                    | 1.96E-05    | 0.466575923 |
| cg13983319 | KIF12                              | 0.000187194 | 0.466575495 |
| cg06480695 |                                    | 1.96E-05    | 0.466575175 |
| cg04415798 | PAX9                               | 9.24E-05    | 0.466549578 |
| cg18856652 | PLEKHH2                            | 1.50E-05    | 0.466500402 |
| cg23516463 |                                    | 2.58E-05    | 0.466471197 |
| cg22388982 | COL4A3;COL4A3;COL4A3;COL4A4;COL4A3 | 4.34E-05    | 0.466411341 |
| cg21232620 | HTR1B                              | 1.50E-05    | 0.466362906 |
| cg01519253 |                                    | 1.96E-05    | 0.466327111 |
| cg16549389 | SCNN1B                             | 4.34E-05    | 0.466248437 |
| cg23447233 | MAEA;MAEA                          | 7.23E-05    | 0.466178357 |
| cg04304036 | SLC7A6;SLC7A6;SLC7A6OS             | 1.96E-05    | 0.466174412 |
| cg13023870 |                                    | 0.000233422 | 0.466152675 |
| cg12993715 |                                    | 1.96E-05    | 0.466072398 |
| cg04671611 | A2BP1;A2BP1                        | 1.50E-05    | 0.466063582 |
| cg02285791 |                                    | 1.18E-05    | 0.466058783 |
| cg06704122 | EN1                                | 9.24E-05    | 0.466041236 |
| cg25465938 | CACNA1E                            | 8.60E-06    | 0.466026064 |
| cg05080154 | SALL3                              | 8.60E-06    | 0.466000767 |
| cg11189837 | ADAMTS1                            | 9.24E-05    | 0.465967846 |
| cg24637364 | PDE4B;PDE4B                        | 1.96E-05    | 0.465876073 |
| cg26953727 |                                    | 4.34E-05    | 0.465849941 |
| cg17186168 | NTSR2                              | 5.59E-05    | 0.465848111 |
| cg25027798 | PCDHA7;PCDHA13;PCDHA12;PCDHA6;PCDH | 0.000148457 | 0.465827425 |
| cg14621053 | ADAM12;ADAM12                      | 1.11E-05    | 0.465825119 |
| cg22601348 |                                    | 8.60E-06    | 0.465822657 |
| cg16166796 | PTPRN                              | 3.21E-05    | 0.465810395 |
| cg13641185 |                                    | 1.96E-05    | 0.465772797 |
| cg21486465 | STEAP2;STEAP2;STEAP2               | 0.000117986 | 0.465765086 |
| cg05492839 | ELOVL4                             | 1.50E-05    | 0.465701631 |
| cg07028533 | CNTNAP2                            | 3.34E-05    | 0.465698594 |
| cg13570101 | NKX2-5;NKX2-5;NKX2-5               | 1.11E-05    | 0.465694932 |
| cg04910970 | PRDM13                             | 1.18E-05    | 0.465646778 |
| cg26947450 | LRIG3;LRIG3                        | 7.23E-05    | 0.465639992 |

|            |                                 |             |             |
|------------|---------------------------------|-------------|-------------|
| cg14369648 | PRSS3                           | 8.60E-06    | 0.465638197 |
| cg12045337 | SP5                             | 5.59E-05    | 0.465581481 |
| cg25383699 | COL21A1                         | 1.50E-05    | 0.465540831 |
| cg22227354 | RAD21L1                         | 0.000122184 | 0.465506882 |
| cg07627556 |                                 | 2.58E-05    | 0.465498866 |
| cg07664990 |                                 | 0.000122184 | 0.465494577 |
| cg24106636 | NHLH2;NHLH2                     | 0.000117986 | 0.465493149 |
| cg17045801 | HECW1                           | 0.000233422 | 0.465491932 |
| cg16409650 | HS6ST3                          | 8.60E-06    | 0.465466001 |
| cg00851389 |                                 | 5.59E-05    | 0.465448099 |
| cg04645150 |                                 | 7.23E-05    | 0.465443825 |
| cg06571075 | MACROD2                         | 9.24E-05    | 0.46544316  |
| cg02121529 |                                 | 3.34E-05    | 0.465438229 |
| cg24205914 | RHOBTB1;RHOBTB1                 | 4.34E-05    | 0.465415219 |
| cg21243919 | PDE11A;PDE11A                   | 3.34E-05    | 0.465393159 |
| cg12595013 | ZIC1                            | 8.60E-06    | 0.46538727  |
| cg26549701 |                                 | 1.96E-05    | 0.465333539 |
| cg21662160 | FREM2                           | 1.11E-05    | 0.465332618 |
| cg12598635 | CPLX1                           | 4.34E-05    | 0.465318879 |
| cg23889440 | MAPK4                           | 0.000187194 | 0.465310491 |
| cg18131689 | ANO5;ANO5                       | 1.11E-05    | 0.465276954 |
| cg03790988 | DOK6                            | 8.60E-06    | 0.465256713 |
| cg03962691 | NGF                             | 1.96E-05    | 0.465238924 |
| cg08871964 | SPTBN4                          | 4.34E-05    | 0.465215598 |
| cg07028914 | TBX18                           | 8.60E-06    | 0.465188638 |
| cg11341610 | CALR                            | 5.59E-05    | 0.465161648 |
| cg06496484 | EVX2                            | 1.96E-05    | 0.465151043 |
| cg15089487 | LRRC49;THAP10                   | 8.60E-06    | 0.465149997 |
| cg25898550 |                                 | 3.34E-05    | 0.46514785  |
| cg16788322 | PPAPDC1A                        | 1.50E-05    | 0.465147562 |
| cg15506477 | LYPD1;LYPD1                     | 5.59E-05    | 0.465144471 |
| cg14805347 | ALDH1A2;ALDH1A2;ALDH1A2;ALDH1A2 | 1.96E-05    | 0.465143219 |
| cg10348234 |                                 | 8.60E-06    | 0.465130225 |
| cg15048660 | FGF12;FGF12                     | 5.59E-05    | 0.465112615 |
| cg06139908 | VSTM2A                          | 3.34E-05    | 0.465106929 |
| cg07681938 | CDH8                            | 1.11E-05    | 0.465057823 |
| cg19555331 | POU4F2                          | 8.60E-06    | 0.465042738 |
| cg00480389 | CBLN4                           | 8.60E-06    | 0.465034564 |
| cg04319611 | FNDC3B;FNDC3B                   | 3.34E-05    | 0.465026241 |
| cg06094615 | C10orf53;C10orf53               | 1.11E-05    | 0.464881069 |
| cg03182958 | SGPP2                           | 2.08E-05    | 0.464873001 |
| cg02992632 | FGF12;FGF12                     | 8.60E-06    | 0.464844808 |
| cg16846653 |                                 | 9.24E-05    | 0.464844142 |
| cg13546414 |                                 | 9.24E-05    | 0.464820562 |
| cg16283362 |                                 | 0.000117986 | 0.464811402 |
| cg14604568 | PDE1C                           | 0.000233422 | 0.464805807 |
| cg17546247 | ZIC4;ZIC1                       | 8.60E-06    | 0.464779969 |
| cg23665778 | DOCK1                           | 0.000290372 | 0.464772417 |
| cg01961447 | GALR3                           | 8.60E-06    | 0.464752206 |
| cg14794428 | ASCL1                           | 5.59E-05    | 0.464746226 |
| cg05967403 | GSX1                            | 4.90E-05    | 0.464745362 |
| cg11938014 | SH3RF2;SH3RF2                   | 2.58E-05    | 0.464712332 |
| cg02383130 | AMPH;AMPH;AMPH;AMPH             | 0.000122184 | 0.464703248 |
| cg27528660 | TRPA1                           | 1.11E-05    | 0.464687672 |
| cg13063344 | GALNT9                          | 1.96E-05    | 0.464683424 |
| cg23934404 |                                 | 0.000122184 | 0.464680109 |
| cg19760241 | LHX1                            | 1.96E-05    | 0.464629748 |
| cg19509393 | HOXD4                           | 2.58E-05    | 0.464604464 |
| cg10378348 |                                 | 0.000117986 | 0.464581585 |
| cg22617773 |                                 | 4.34E-05    | 0.464556911 |

|            |                                    |             |             |
|------------|------------------------------------|-------------|-------------|
| cg10879116 | LPAR3                              | 8.60E-06    | 0.464555003 |
| cg02722596 | PCDHGA4;PCDHGA7;PCDHGA6;PCDHGA1;PC | 1.11E-05    | 0.464537512 |
| cg03983645 | DBX1                               | 5.59E-05    | 0.46453738  |
| cg08957652 | IHH                                | 9.24E-05    | 0.464517584 |
| cg05883874 | ZNF214;NLRP14                      | 9.24E-05    | 0.464517502 |
| cg13670911 | SGEF                               | 2.58E-05    | 0.464504931 |
| cg23683588 | PAX9                               | 0.000233422 | 0.464492623 |
| cg17935297 | CILP2                              | 8.60E-06    | 0.464481029 |
| cg02119363 | PEX5L                              | 1.96E-05    | 0.464431742 |
| cg06481168 | C4orf39;TRIM61                     | 0.000187194 | 0.464414416 |
| cg00162231 | SLC6A1                             | 1.50E-05    | 0.464402903 |
| cg02826439 |                                    | 3.34E-05    | 0.464401713 |
| cg07095995 | COL25A1;COL25A1                    | 8.60E-06    | 0.464388402 |
| cg11557901 |                                    | 2.58E-05    | 0.464369457 |
| cg26366091 | CHI3L2;CHI3L2                      | 0.000117986 | 0.464365815 |
| cg01725586 | FAM123C;FAM123C;FAM123C;FAM123C    | 9.24E-05    | 0.464365679 |
| cg02898293 | VSX1;VSX1                          | 8.60E-06    | 0.464326481 |
| cg01916333 | SNCAIP                             | 2.58E-05    | 0.464311788 |
| cg24141863 | WDR17;WDR17                        | 0.000117986 | 0.464309474 |
| cg04178787 |                                    | 2.58E-05    | 0.464300068 |
| cg05205953 | CXCL2                              | 0.000365373 | 0.464291431 |
| cg08561856 | LYPD5                              | 0.000290372 | 0.464286823 |
| cg16254309 | CNTNAP2                            | 1.50E-05    | 0.464281796 |
| cg01419567 | ZFH4;LOC100192378                  | 1.96E-05    | 0.464219662 |
| cg05237641 | ADAM12;ADAM12                      | 1.11E-05    | 0.464210956 |
| cg24543696 | DKK3;DKK3;DKK3                     | 5.59E-05    | 0.464172006 |
| cg16999370 | QRFPR                              | 5.59E-05    | 0.464171673 |
| cg06360427 | GALR1                              | 8.60E-06    | 0.464150804 |
| cg07173635 |                                    | 1.50E-05    | 0.464116663 |
| cg13314145 | NPTX2                              | 5.59E-05    | 0.464114572 |
| cg14965220 | MKX                                | 5.59E-05    | 0.464103627 |
| cg24871540 | MYH14;MYH14;MYH14                  | 1.96E-05    | 0.464103556 |
| cg13177747 | RSPO2                              | 8.60E-06    | 0.464049341 |
| cg12466737 | BRUNOL4;BRUNOL4;BRUNOL4;BRUNOL4    | 6.94E-05    | 0.46398792  |
| cg13033090 | BRUNOL4;BRUNOL4;BRUNOL4;BRUNOL4    | 8.60E-06    | 0.463966724 |
| cg24154839 | GABRA4                             | 3.21E-05    | 0.463943921 |
| cg15529692 | BMP7                               | 8.60E-06    | 0.463908582 |
| cg25444386 | KDR                                | 0.000334462 | 0.463868833 |
| cg07449069 | CACNA2D3                           | 0.000187194 | 0.46380968  |
| cg24767148 | PTF1A                              | 1.50E-05    | 0.463788698 |
| cg23842170 | EPHA5;EPHA5                        | 1.11E-05    | 0.463788315 |
| cg01924292 | ADIPOR2                            | 5.59E-05    | 0.463626423 |
| cg02512920 |                                    | 8.60E-06    | 0.463600109 |
| cg14676407 | CPXM2;CPXM2                        | 2.58E-05    | 0.46354627  |
| cg09643136 |                                    | 8.60E-06    | 0.463523465 |
| cg00003994 | MEOX2                              | 8.60E-06    | 0.463507803 |
| cg00929798 | CALY                               | 9.24E-05    | 0.463504634 |
| cg26184474 | KIF2A;KIF2A                        | 1.96E-05    | 0.46348943  |
| cg23683254 |                                    | 8.60E-06    | 0.463407401 |
| cg12468774 | CCDC36;CCDC36                      | 1.50E-05    | 0.463405176 |
| cg19248676 |                                    | 8.60E-06    | 0.463390422 |
| cg23173307 | CPLX1                              | 1.96E-05    | 0.463358725 |
| cg10370599 | HS3ST2                             | 8.60E-06    | 0.463356997 |
| cg06187770 |                                    | 1.96E-05    | 0.463324462 |
| cg07090701 | C1QL2                              | 1.50E-05    | 0.463267485 |
| cg08812889 |                                    | 1.11E-05    | 0.463267399 |
| cg00258409 | CPE                                | 1.11E-05    | 0.463246438 |
| cg23536473 | FERD3L                             | 7.23E-05    | 0.463233568 |
| cg17078253 |                                    | 1.96E-05    | 0.463213818 |
| cg10250663 | IRX6                               | 2.58E-05    | 0.463175274 |

|            |                             |             |             |
|------------|-----------------------------|-------------|-------------|
| cg18778433 | PARVA;PARVA                 | 1.50E-05    | 0.463173257 |
| cg00191178 |                             | 4.34E-05    | 0.463156671 |
| cg12965599 | ZIC1                        | 3.34E-05    | 0.463095681 |
| cg00974941 | C7orf57                     | 5.59E-05    | 0.463087198 |
| cg10819238 | SBNO2                       | 2.58E-05    | 0.463039517 |
| cg17977409 | SH3GL2;SH3GL2               | 3.34E-05    | 0.462988471 |
| cg12628145 | SLC9A3                      | 7.23E-05    | 0.46298501  |
| cg06165395 | GRIK3                       | 1.96E-05    | 0.462958659 |
| cg00970313 | PAX9                        | 1.96E-05    | 0.462906073 |
| cg26063563 | KCNN2                       | 0.000187194 | 0.462885525 |
| cg24376776 |                             | 2.58E-05    | 0.462824556 |
| cg09655666 |                             | 2.58E-05    | 0.462778375 |
| cg15854847 | NKX2-6                      | 3.34E-05    | 0.462725541 |
| cg10288541 |                             | 2.02E-05    | 0.462710926 |
| cg05253577 | WWC1;WWC1;WWC1              | 0.000148457 | 0.462654969 |
| cg14412322 | MAGI1;MAGI1;MAGI1           | 1.96E-05    | 0.462638426 |
| cg03219968 | ESRRG                       | 9.24E-05    | 0.462601111 |
| cg27031435 |                             | 2.58E-05    | 0.462593607 |
| cg16433156 | SALL3                       | 8.60E-06    | 0.462546714 |
| cg18250028 | CARTPT                      | 4.34E-05    | 0.46251208  |
| cg08631504 |                             | 3.34E-05    | 0.462502778 |
| cg21117734 |                             | 3.34E-05    | 0.462495525 |
| cg27205687 | GUCY1A2;GUCY1A2             | 1.11E-05    | 0.462485935 |
| cg17404915 | OVOL2                       | 9.24E-05    | 0.462459411 |
| cg05290058 | KCNQ1DN                     | 3.34E-05    | 0.462439398 |
| cg15310492 | KCNA4                       | 5.59E-05    | 0.462430396 |
| cg13931925 | NPHS2                       | 1.50E-05    | 0.462403708 |
| cg25800765 | ALX1                        | 1.11E-05    | 0.462398925 |
| cg24073466 | PHYHIPL;PHYHIPL             | 1.11E-05    | 0.462347814 |
| cg13196796 | MORN4;MORN4;MORN4           | 9.24E-05    | 0.462329065 |
| cg17203063 | KCNC2;KCNC2;KCNC2           | 4.34E-05    | 0.462319203 |
| cg24719321 | BSX                         | 8.60E-06    | 0.462305619 |
| cg18391899 |                             | 1.96E-05    | 0.462280404 |
| cg06645033 |                             | 2.58E-05    | 0.462272524 |
| cg03045635 | DRD5                        | 0.000117986 | 0.462270896 |
| cg09495418 | GLDN                        | 1.50E-05    | 0.462212118 |
| cg00110654 |                             | 6.94E-05    | 0.46220722  |
| cg08439930 | SALL1;SALL1                 | 0.001376172 | 0.462168633 |
| cg18438793 | HPCAL4                      | 9.04E-05    | 0.462165307 |
| cg26781129 | ZNF502;ZNF502;ZNF502;ZNF502 | 4.34E-05    | 0.462149694 |
| cg23445003 | CUX1;CUX1;CUX1              | 1.50E-05    | 0.462122864 |
| cg16792800 | GPC6;GPC6                   | 3.34E-05    | 0.462108926 |
| cg06407470 | SV2C                        | 4.34E-05    | 0.462106478 |
| cg20023231 | HS3ST2                      | 1.11E-05    | 0.462088208 |
| cg17714025 | KCNA4                       | 4.34E-05    | 0.462070682 |
| cg09912667 | LPAR3                       | 2.58E-05    | 0.462058826 |
| cg21010859 | BDNF;BDNF;BDNF;BDNF;BDNF    | 8.60E-06    | 0.462048512 |
| cg24974423 | HS6ST3                      | 1.50E-05    | 0.462039054 |
| cg27139836 | CCDC108                     | 2.58E-05    | 0.462036176 |
| cg10776919 | DMRTA2                      | 1.11E-05    | 0.462034435 |
| cg10573386 | CELSR3                      | 0.000187194 | 0.462024995 |
| cg21836370 |                             | 5.59E-05    | 0.462010051 |
| cg19635401 | C6orf204;PLN;C6orf204       | 2.58E-05    | 0.461988031 |
| cg09042277 | TBX5;TBX5;TBX5;TBX5         | 1.11E-05    | 0.461970416 |
| cg00095594 | NID1                        | 0.000187194 | 0.461949783 |
| cg18655369 |                             | 3.34E-05    | 0.461944241 |
| cg18952647 | BNC1                        | 1.50E-05    | 0.461939692 |
| cg12678562 | GPC5                        | 3.34E-05    | 0.461902818 |
| cg05488043 | P2RY1;P2RY1                 | 0.000187194 | 0.461867058 |
| cg03514351 | LEPR;LEPR;LEPR              | 8.60E-06    | 0.461827187 |



|            |                                       |             |             |
|------------|---------------------------------------|-------------|-------------|
| cg16135716 | GRIN2B                                | 1.96E-05    | 0.461810633 |
| cg21858380 | C1QL2                                 | 8.60E-06    | 0.461781463 |
| cg27315742 | VGLL2;VGLL2                           | 8.60E-06    | 0.461759304 |
| cg21621248 | CTNNA2;CTNNA2;LRRTM1                  | 8.60E-06    | 0.461750713 |
| cg27347269 | DOK6                                  | 1.96E-05    | 0.461717298 |
| cg10931190 | TSLP                                  | 9.24E-05    | 0.461692068 |
| cg04546041 | ZNF304                                | 5.59E-05    | 0.461680696 |
| cg23536629 |                                       | 7.23E-05    | 0.461625536 |
| cg00674706 |                                       | 2.58E-05    | 0.461614574 |
| cg10983199 |                                       | 4.34E-05    | 0.461613565 |
| cg26843074 | STAC                                  | 5.59E-05    | 0.461595533 |
| cg11641791 | KRT222                                | 4.34E-05    | 0.461586157 |
| cg01300410 | TMEM20;TMEM20                         | 1.96E-05    | 0.461585512 |
| cg10177394 |                                       | 3.34E-05    | 0.461580444 |
| cg07566080 | DAB1                                  | 9.24E-05    | 0.461534134 |
| cg25739875 | TFAP2A;TFAP2A                         | 1.96E-05    | 0.461532381 |
| cg09140723 | SGPL1                                 | 8.60E-06    | 0.461518887 |
| cg10966580 |                                       | 1.50E-05    | 0.461518094 |
| cg16630482 |                                       | 3.34E-05    | 0.4615069   |
| cg26846959 | PHACTR2;PHACTR2;PHACTR2;PHACTR2       | 3.34E-05    | 0.461486188 |
| cg23255835 | CLIP4                                 | 0.000187194 | 0.461477213 |
| cg14510359 | MMEL1                                 | 3.34E-05    | 0.46146356  |
| cg08457011 |                                       | 4.34E-05    | 0.461367858 |
| cg05200313 | SLC24A4;SLC24A4;SLC24A4               | 4.34E-05    | 0.461366591 |
| cg12521353 | TFAP2C;TFAP2C                         | 5.59E-05    | 0.461358038 |
| cg10767350 |                                       | 8.60E-06    | 0.46135669  |
| cg23524195 | GFRA1;GFRA1                           | 0.000654035 | 0.461340288 |
| cg13921352 | FAM19A4;FAM19A4                       | 1.50E-05    | 0.461330446 |
| cg01908954 | SCG3;SCG3;SCG3;SCG3                   | 7.23E-05    | 0.461312275 |
| cg05555111 |                                       | 8.60E-06    | 0.461241608 |
| cg18530551 |                                       | 5.59E-05    | 0.461233773 |
| cg14703605 | TRPA1                                 | 8.60E-06    | 0.461222746 |
| cg24941342 |                                       | 0.000117986 | 0.461159271 |
| cg26690949 |                                       | 0.000187194 | 0.461125724 |
| cg12630082 | PKDCC                                 | 2.58E-05    | 0.461081695 |
| cg22335876 |                                       | 1.96E-05    | 0.461073995 |
| cg25082959 | FGF14                                 | 0.000290372 | 0.461069812 |
| cg00369414 | CACNA1H;CACNA1H                       | 0.000148457 | 0.461066038 |
| cg19352038 | PAX3;PAX3;PAX3;PAX3;PAX3;CCDC140;PAX3 | 8.60E-06    | 0.461037404 |
| cg21263566 |                                       | 4.34E-05    | 0.461024581 |
| cg14789818 |                                       | 8.60E-06    | 0.461023916 |
| cg06634914 |                                       | 1.11E-05    | 0.461022823 |
| cg02796279 |                                       | 3.34E-05    | 0.461021281 |
| cg11437784 |                                       | 0.000458355 | 0.46097955  |
| cg18517195 | LRRC49;THAP10                         | 8.60E-06    | 0.460975424 |
| cg26394257 | ADAM32                                | 8.60E-06    | 0.460949815 |
| cg10055501 | PITX2;PITX2;PITX2                     | 0.000117986 | 0.46094543  |
| cg04904784 |                                       | 7.23E-05    | 0.460944881 |
| cg02990869 | MARCH1                                | 8.60E-06    | 0.46092859  |
| cg21773967 | PMP22;PMP22                           | 8.60E-06    | 0.460928112 |
| cg06207120 |                                       | 1.11E-05    | 0.460924731 |
| cg21801378 | BRUNOL6                               | 1.50E-05    | 0.460916989 |
| cg03192598 |                                       | 7.23E-05    | 0.460860684 |
| cg07068756 | UCHL1;UCHL1                           | 1.96E-05    | 0.460844358 |
| cg02172857 | LCA5;LCA5                             | 0.00043997  | 0.460812709 |
| cg11659501 | ACSS3                                 | 1.11E-05    | 0.460806355 |
| cg01671895 | PGR                                   | 9.24E-05    | 0.460792301 |
| cg13996155 | FGF10                                 | 1.96E-05    | 0.460789902 |
| cg06972969 | PHYHIPL                               | 8.60E-06    | 0.460759293 |
| cg19119032 | CDH7;CDH7                             | 8.60E-06    | 0.460755925 |

|            |                                       |             |             |
|------------|---------------------------------------|-------------|-------------|
| cg02492791 | SLC6A15;SLC6A15;SLC6A15;SLC6A15;SLC6A | 1.11E-05    | 0.460742633 |
| cg07744841 | SLC6A11                               | 1.50E-05    | 0.460721339 |
| cg22065614 | GLRB;GLRB;GLRB;GLRB;GLRB              | 0.000117986 | 0.460717461 |
| cg22766145 | BHLHE22                               | 8.60E-06    | 0.460712785 |
| cg21385666 | SOX1;SOX1                             | 1.50E-05    | 0.460698639 |
| cg12456799 | SORCS3                                | 1.96E-05    | 0.460687208 |
| cg14891209 | LOC145845                             | 6.94E-05    | 0.460686058 |
| cg02485347 | DOCK5                                 | 3.34E-05    | 0.460650531 |
| cg03521736 | PPAP2C;PPAP2C;PPAP2C                  | 2.58E-05    | 0.460639958 |
| cg15233892 | VGLL2;VGLL2                           | 2.58E-05    | 0.460614403 |
| cg10679301 |                                       | 0.000233422 | 0.460593798 |
| cg12881363 | MOV10L1;MOV10L1;MOV10L1               | 1.96E-05    | 0.46059038  |
| cg03614193 | ST8SIA3                               | 1.11E-05    | 0.460590325 |
| cg24813736 |                                       | 3.34E-05    | 0.460560587 |
| cg00379720 |                                       | 3.34E-05    | 0.46050715  |
| cg13138137 | BRUNOL4;BRUNOL4;BRUNOL4;BRUNOL4       | 0.000148457 | 0.460454039 |
| cg06807397 | SERP2                                 | 8.60E-06    | 0.460444018 |
| cg06792340 |                                       | 1.50E-05    | 0.460417122 |
| cg03078269 |                                       | 0.000233422 | 0.460375901 |
| cg01894048 | KCNN2                                 | 1.50E-05    | 0.460373619 |
| cg16312002 |                                       | 4.34E-05    | 0.46035465  |
| cg24369728 |                                       | 8.60E-06    | 0.460348257 |
| cg22538780 | LOC100192378                          | 1.50E-05    | 0.460346296 |
| cg21913681 | TBX3;TBX3                             | 9.24E-05    | 0.460302272 |
| cg11343211 |                                       | 0.000117986 | 0.460297969 |
| cg13088556 |                                       | 1.96E-05    | 0.460288122 |
| cg13356117 | TTC12                                 | 8.60E-06    | 0.460270617 |
| cg13208922 |                                       | 1.11E-05    | 0.460267003 |
| cg13022679 | PCDHA2;PCDHA1;PCDHA1;PCDHA6;PCDHA5    | 7.23E-05    | 0.460266452 |
| cg19102955 | TRMT6                                 | 0.000187194 | 0.460256048 |
| cg20714110 |                                       | 3.92E-05    | 0.460237    |
| cg16204818 |                                       | 2.58E-05    | 0.460234442 |
| cg22773899 |                                       | 8.60E-06    | 0.460233388 |
| cg20591472 | SYPL2                                 | 8.60E-06    | 0.460188169 |
| cg06008724 | PHF21B;PHF21B                         | 8.60E-06    | 0.460161197 |
| cg03145658 |                                       | 4.34E-05    | 0.460154659 |
| cg09938511 | LOC100192378                          | 2.58E-05    | 0.460137112 |
| cg21820677 | GABRA2;GABRA2                         | 8.60E-06    | 0.460124155 |
| cg15094819 | DNAH9                                 | 8.60E-06    | 0.460070769 |
| cg17227156 | BRUNOL4;BRUNOL4;BRUNOL4;BRUNOL4       | 8.60E-06    | 0.460042266 |
| cg09727046 | MIR548H4                              | 2.58E-05    | 0.460030006 |
| cg05679507 | ART5;ART5;ART5                        | 0.000117986 | 0.459939218 |
| cg24637426 | FGF12                                 | 1.96E-05    | 0.459904136 |
| cg01138867 | GABRB2;GABRB2                         | 1.50E-05    | 0.459827386 |
| cg08036492 | COX10                                 | 2.58E-05    | 0.459819786 |
| cg21928701 | LPPR3                                 | 4.34E-05    | 0.459806347 |
| cg08992305 | TRIM61;C4orf39                        | 1.11E-05    | 0.459793661 |
| cg23358612 | UNCX                                  | 8.60E-06    | 0.459776049 |
| cg03646916 | ZNF167;ZNF167                         | 0.000537905 | 0.459762842 |
| cg12165551 |                                       | 1.50E-05    | 0.459740157 |
| cg14455170 |                                       | 0.000290372 | 0.459739963 |
| cg26788672 |                                       | 1.96E-05    | 0.459734939 |
| cg21278103 | PTPRA;PTPRA;PTPRA                     | 0.000357885 | 0.459710518 |
| cg25078150 |                                       | 4.34E-05    | 0.459708548 |
| cg02029926 | CXCL1                                 | 1.50E-05    | 0.459685196 |
| cg07599133 | LOC643719                             | 7.23E-05    | 0.459665593 |
| cg09062595 | RND3                                  | 1.96E-05    | 0.459650232 |
| cg07254054 | EPHA6                                 | 4.34E-05    | 0.459649871 |
| cg21399832 |                                       | 8.60E-06    | 0.459639089 |
| cg25330843 |                                       | 2.58E-05    | 0.459593606 |

|            |                                    |             |             |
|------------|------------------------------------|-------------|-------------|
| cg20727434 |                                    | 3.34E-05    | 0.459586707 |
| cg16589214 | CALCR;CALCR                        | 1.11E-05    | 0.459584845 |
| cg01254303 | SRRM4                              | 0.000537905 | 0.459543363 |
| cg13331196 |                                    | 2.58E-05    | 0.459498017 |
| cg07821629 | AMPH;AMPH                          | 2.58E-05    | 0.45949636  |
| cg09896412 |                                    | 2.58E-05    | 0.459493341 |
| cg10717463 | SALL3                              | 1.96E-05    | 0.459474906 |
| cg07068674 |                                    | 2.58E-05    | 0.459474822 |
| cg03927037 | ARHGAP20                           | 9.24E-05    | 0.45946707  |
| cg15104158 | FGF12                              | 1.96E-05    | 0.459445032 |
| cg03378876 | KIAA1755;KIAA1755                  | 2.58E-05    | 0.459406821 |
| cg04954559 | SLC17A6                            | 3.34E-05    | 0.459386654 |
| cg09558195 | GRM1;GRM1                          | 1.50E-05    | 0.459372952 |
| cg12399700 | LHX5                               | 3.34E-05    | 0.459329242 |
| cg02884176 | FOXI3                              | 1.96E-05    | 0.45932657  |
| cg24131595 | GRP;GRP;GRP                        | 1.50E-05    | 0.459303908 |
| cg06954481 | GBX2                               | 1.96E-05    | 0.459290206 |
| cg16804284 | FOXG1                              | 1.96E-05    | 0.459269467 |
| cg11678324 | TLL1                               | 1.50E-05    | 0.459243787 |
| cg24234899 |                                    | 3.34E-05    | 0.459240108 |
| cg16441068 | RCOR1                              | 0.000117986 | 0.45920688  |
| cg21660960 | SLC40A1                            | 4.34E-05    | 0.459182278 |
| cg16457786 | ADCYAP1;ADCYAP1                    | 5.59E-05    | 0.459165247 |
| cg17478979 | ZC3H12D                            | 5.59E-05    | 0.459115477 |
| cg04688828 | LYNX1;LYNX1;LYNX1;LYNX1;LYNX1      | 5.59E-05    | 0.459110752 |
| cg00405688 | FOXI2                              | 8.60E-06    | 0.45908976  |
| cg08279184 | WASF3                              | 5.59E-05    | 0.459076269 |
| cg24490542 | CSMD2                              | 5.59E-05    | 0.459059216 |
| cg26844246 | TLX3                               | 8.60E-06    | 0.458994858 |
| cg08441170 | MYO3A;MYO3A                        | 0.000148457 | 0.458982484 |
| cg12331389 | RBP4                               | 2.58E-05    | 0.458869092 |
| cg05676400 |                                    | 1.50E-05    | 0.458821621 |
| cg17591816 | DNM3;DNM3                          | 0.000117986 | 0.458791639 |
| cg21549299 | C21orf88;C21orf88                  | 7.23E-05    | 0.45879101  |
| cg02229775 | CACNG4                             | 2.58E-05    | 0.458786957 |
| cg02928699 | GRM5;GRM5                          | 1.96E-05    | 0.458783922 |
| cg06989930 | DBX1                               | 0.000158823 | 0.45878143  |
| cg20247486 |                                    | 5.59E-05    | 0.458742209 |
| cg09022422 | SLC6A11                            | 8.60E-06    | 0.458732809 |
| cg04749646 | MARCH4;MARCH4                      | 2.58E-05    | 0.458705695 |
| cg12158471 | RGS7BP                             | 5.59E-05    | 0.458691113 |
| cg17459204 | PREX2;PREX2                        | 2.58E-05    | 0.458669314 |
| cg07622493 |                                    | 8.60E-06    | 0.45862775  |
| cg20357538 | CHSY1                              | 7.23E-05    | 0.458605693 |
| cg05043349 |                                    | 4.34E-05    | 0.458604679 |
| cg24847829 | SPOCK1                             | 0.000187194 | 0.458580898 |
| cg00310215 | SALL1;SALL1                        | 9.04E-05    | 0.458564143 |
| cg19753526 | FHL2;FHL2;FHL2;FHL2;FHL2;FHL2;FHL2 | 0.000148457 | 0.458550313 |
| cg11551464 |                                    | 7.23E-05    | 0.458509704 |
| cg03134157 |                                    | 0.000187194 | 0.458488634 |
| cg17994569 | CHAT;CHAT;CHAT;CHAT;CHAT;CHAT;CHAT | 9.24E-05    | 0.458468253 |
| cg10735015 | PHACTR2;PHACTR2                    | 0.000148457 | 0.458435781 |
| cg26124318 | ADAM32;ADAM32                      | 1.11E-05    | 0.458427966 |
| cg11427510 | ADAMTS9                            | 0.000290372 | 0.458423287 |
| cg01642521 |                                    | 0.000117986 | 0.458411545 |
| cg06001524 | STX8                               | 4.34E-05    | 0.458410219 |
| cg00159243 | SELPLG                             | 3.34E-05    | 0.458404862 |
| cg24497541 | DHCR24;DHCR24                      | 1.96E-05    | 0.458357268 |
| cg18292664 | DBX1                               | 2.58E-05    | 0.458356718 |
| cg15235798 |                                    | 1.50E-05    | 0.458349998 |

|            |                                 |             |             |
|------------|---------------------------------|-------------|-------------|
| cg24624901 |                                 | 8.60E-06    | 0.458331778 |
| cg07382454 | TM6SF2                          | 4.34E-05    | 0.458269509 |
| cg08441806 | NKX6-2                          | 8.60E-06    | 0.458236441 |
| cg10961604 | CD164L2;CD164L2                 | 5.59E-05    | 0.458224364 |
| cg13513864 | REM1                            | 4.34E-05    | 0.458182611 |
| cg03625287 |                                 | 8.60E-06    | 0.458180132 |
| cg16640599 | SEC24D                          | 2.58E-05    | 0.458120905 |
| cg12116288 |                                 | 1.11E-05    | 0.458112961 |
| cg01357429 | EVX1                            | 0.00043997  | 0.458062706 |
| cg21331088 | ADCYAP1;ADCYAP1                 | 1.96E-05    | 0.458052176 |
| cg21882300 |                                 | 8.60E-06    | 0.458025765 |
| cg19365673 | LPPR5;LPPR5                     | 5.59E-05    | 0.458022985 |
| cg22528270 | PRKAG2;PRKAG2                   | 5.59E-05    | 0.458011544 |
| cg23334433 | AATK                            | 3.34E-05    | 0.457977658 |
| cg21568106 |                                 | 2.58E-05    | 0.457973349 |
| cg04763554 |                                 | 1.50E-05    | 0.457947705 |
| cg16768018 | ZIC4;ZIC4;ZIC4;ZIC4;ZIC4        | 5.59E-05    | 0.457929276 |
| cg03857198 |                                 | 2.58E-05    | 0.45792403  |
| cg07212778 | C1QL2                           | 8.60E-06    | 0.457908012 |
| cg04671932 | MAGI2                           | 1.11E-05    | 0.457897958 |
| cg06842954 | PITX2;PITX2                     | 0.000187194 | 0.457890487 |
| cg25923609 |                                 | 0.000791389 | 0.45783987  |
| cg19350360 |                                 | 3.34E-05    | 0.457804959 |
| cg03949391 | PTGFR;PTGFR;PTGFR;PTGFR         | 1.11E-05    | 0.457767973 |
| cg13416213 |                                 | 5.59E-05    | 0.457767657 |
| cg18181323 | PRDM5                           | 4.34E-05    | 0.457759329 |
| cg09054633 | SPOCK1                          | 8.60E-06    | 0.457703    |
| cg11663376 |                                 | 1.96E-05    | 0.457698024 |
| cg25208479 |                                 | 7.23E-05    | 0.457687394 |
| cg04184232 | C14orf23;C14orf23               | 1.50E-05    | 0.457672651 |
| cg05663341 | DLX6AS;DLX6                     | 0.001147425 | 0.457659298 |
| cg03175653 | GALR1                           | 8.60E-06    | 0.457654593 |
| cg02938205 | CCDC36;CCDC36                   | 1.96E-05    | 0.457643513 |
| cg26444528 | PCDH17                          | 3.34E-05    | 0.457637563 |
| cg10903451 | FIGN                            | 3.34E-05    | 0.457631519 |
| cg12092090 | CACNA1A;CACNA1A                 | 0.000233422 | 0.45757661  |
| cg00112952 | OR2B11                          | 4.34E-05    | 0.457567974 |
| cg27487839 | XKR6                            | 0.000537905 | 0.457551792 |
| cg24753760 | GRIK2;GRIK2;GRIK2               | 1.11E-05    | 0.457514717 |
| cg07091500 |                                 | 0.000791389 | 0.457489724 |
| cg17003293 | INSM2                           | 9.24E-05    | 0.457475274 |
| cg24436715 |                                 | 2.58E-05    | 0.457474624 |
| cg04940329 | KRT23                           | 8.60E-06    | 0.457329734 |
| cg06066700 | FAM124B;FAM124B                 | 0.00043997  | 0.457314023 |
| cg23936531 |                                 | 2.58E-05    | 0.457305627 |
| cg22724998 |                                 | 0.000158823 | 0.457265568 |
| cg20513548 | GPR85;GPR85;GPR85;GPR85;GPR85   | 8.60E-06    | 0.45719324  |
| cg07726139 |                                 | 8.60E-06    | 0.457165708 |
| cg26464821 | DLC1;DLC1;DLC1                  | 0.000526175 | 0.457138497 |
| cg13382322 | BRUNOL4;BRUNOL4;BRUNOL4;BRUNOL4 | 9.24E-05    | 0.45711853  |
| cg15720043 | LOC100192378                    | 8.60E-06    | 0.457115293 |
| cg09279240 | ZNF385B;MIR1258                 | 9.24E-05    | 0.457074526 |
| cg10186131 |                                 | 4.34E-05    | 0.457066366 |
| cg21383151 | TBC1D12                         | 2.58E-05    | 0.457057051 |
| cg22864077 |                                 | 1.11E-05    | 0.457012876 |
| cg22557662 | PPP1R14A                        | 0.00043997  | 0.457005312 |
| cg01225698 | BDNF;BDNF;BDNF;BDNF;BDNF        | 1.11E-05    | 0.456993511 |
| cg23497704 | LHX5                            | 3.30E-05    | 0.456983614 |
| cg26156256 |                                 | 4.34E-05    | 0.456956789 |
| cg11733675 | NLGN1                           | 1.96E-05    | 0.456955355 |

|            |                                 |             |             |
|------------|---------------------------------|-------------|-------------|
| cg04090392 | BNC1                            | 1.50E-05    | 0.456943193 |
| cg18417423 | ELOVL4                          | 1.96E-05    | 0.456908682 |
| cg08774443 |                                 | 0.000148457 | 0.456903283 |
| cg00525823 | FAM38B                          | 1.50E-05    | 0.4568936   |
| cg06955484 | TAL1;TAL1                       | 2.58E-05    | 0.456857429 |
| cg13092806 |                                 | 0.00043997  | 0.456826171 |
| cg11213369 |                                 | 1.11E-05    | 0.456768258 |
| cg15139644 | BRUNOL4;BRUNOL4;BRUNOL4;BRUNOL4 | 4.34E-05    | 0.456761214 |
| cg14814195 | FOXQ1                           | 8.60E-06    | 0.456758442 |
| cg11711420 | ISL1;ISL1                       | 4.34E-05    | 0.456735608 |
| cg17515837 | C15orf27                        | 3.34E-05    | 0.456719125 |
| cg20532370 | RBP1;RBP1;RBP1                  | 0.000290372 | 0.456699529 |
| cg08690859 | FLJ32063                        | 4.34E-05    | 0.456685448 |
| cg18175036 | MAST4;MAST4                     | 0.001195582 | 0.456658375 |
| cg13974192 |                                 | 2.58E-05    | 0.456614075 |
| cg08004278 |                                 | 8.60E-06    | 0.456556045 |
| cg23487201 | APCDD1L                         | 1.96E-05    | 0.456545953 |
| cg07811198 | DPP6                            | 1.50E-05    | 0.456539354 |
| cg22340508 |                                 | 1.50E-05    | 0.456538054 |
| cg23015696 | LEPREL1;LEPREL1                 | 8.60E-06    | 0.456522831 |
| cg13358636 | CNTNAP5                         | 4.34E-05    | 0.456499702 |
| cg03757784 | HS3ST2                          | 8.60E-06    | 0.456499445 |
| cg17486097 | UNC5D                           | 4.34E-05    | 0.456478732 |
| cg06315974 | ADAR                            | 8.60E-06    | 0.456450325 |
| cg01552272 | MACROD2                         | 5.59E-05    | 0.456420361 |
| cg26896572 | C3orf14                         | 0.000148457 | 0.456408533 |
| cg27052403 | TTC12                           | 7.23E-05    | 0.456372743 |
| cg03145999 | ZSCAN18;ZSCAN18                 | 9.24E-05    | 0.456367764 |
| cg01662869 | MGRN1;MGRN1;MGRN1;MGRN1         | 4.34E-05    | 0.456342404 |
| cg03469054 | TMEM132D                        | 8.60E-06    | 0.456330223 |
| cg16248329 | FAT1                            | 0.001376172 | 0.456326404 |
| cg19055828 | DIP2B                           | 1.11E-05    | 0.456322645 |
| cg23169883 | ADAMTS14;ADAMTS14               | 7.23E-05    | 0.456315374 |
| cg05791136 | COL25A1;COL25A1                 | 8.60E-06    | 0.45629939  |
| cg13407456 |                                 | 1.96E-05    | 0.456275444 |
| cg06651311 | KIAA1239                        | 2.58E-05    | 0.45624089  |
| cg19275261 |                                 | 2.58E-05    | 0.456232702 |
| cg01765111 |                                 | 3.34E-05    | 0.456204066 |
| cg03422911 | RYR2                            | 1.96E-05    | 0.45619601  |
| cg24675998 | KY                              | 8.60E-06    | 0.456066822 |
| cg26490054 | SLC5A8                          | 1.96E-05    | 0.456049635 |
| cg08107689 |                                 | 1.96E-05    | 0.456042089 |
| cg18490614 |                                 | 8.60E-06    | 0.456008936 |
| cg16019434 |                                 | 8.60E-06    | 0.45599767  |
| cg14615336 | AGBL4;AGBL4                     | 8.60E-06    | 0.455947765 |
| cg10094616 | FAM150A                         | 1.96E-05    | 0.455886588 |
| cg20457796 | SLC18A3;CHAT                    | 8.60E-06    | 0.455885543 |
| cg23166865 |                                 | 1.96E-05    | 0.455876461 |
| cg21957905 | SORCS2                          | 1.50E-05    | 0.45586974  |
| cg09686443 | CCDC37                          | 1.11E-05    | 0.455865938 |
| cg08894594 | INADL                           | 0.000357885 | 0.455860331 |
| cg03384825 | DAB1                            | 0.000117986 | 0.455740399 |
| cg11452391 | MARCH11                         | 8.60E-06    | 0.455720871 |
| cg22916722 |                                 | 7.23E-05    | 0.455713538 |
| cg15823845 | ZFR2;ZFR2;ZFR2                  | 5.59E-05    | 0.455684002 |
| cg27046936 | PTGFR;PTGFR;PTGFR;PTGFR         | 8.60E-06    | 0.455666053 |
| cg05956498 | EFHA2                           | 1.11E-05    | 0.455626845 |
| cg11908131 | C2orf40                         | 4.34E-05    | 0.45561603  |
| cg22135752 | LOC255167;LOC255167             | 1.11E-05    | 0.455613204 |
| cg14283944 |                                 | 1.50E-05    | 0.455612265 |

|            |                                    |             |             |
|------------|------------------------------------|-------------|-------------|
| cg12728578 | ZNF204P                            | 9.24E-05    | 0.455584227 |
| cg01729827 | CBLN4                              | 4.34E-05    | 0.455570253 |
| cg05880330 |                                    | 2.58E-05    | 0.455561081 |
| cg20659435 |                                    | 3.34E-05    | 0.455559767 |
| cg25024717 |                                    | 8.60E-06    | 0.455555906 |
| cg10715223 | SNX31;SNX31                        | 3.34E-05    | 0.455545205 |
| cg18836626 | ATP8A2                             | 8.60E-06    | 0.455535396 |
| cg11107212 |                                    | 4.34E-05    | 0.455431538 |
| cg01178451 | GALR1;GALR1                        | 3.21E-05    | 0.455352132 |
| cg21054521 |                                    | 2.58E-05    | 0.455340649 |
| cg26461267 |                                    | 4.34E-05    | 0.455339475 |
| cg02745211 | TMEM108;TMEM108                    | 0.000117986 | 0.455336547 |
| cg00563873 |                                    | 5.59E-05    | 0.455330015 |
| cg11183632 |                                    | 2.58E-05    | 0.455284946 |
| cg09501509 |                                    | 1.96E-05    | 0.455255046 |
| cg10171448 | NKX6-2                             | 1.50E-05    | 0.455230944 |
| cg12072560 | CIDEA;CIDEA                        | 7.23E-05    | 0.455198705 |
| cg08688659 | CD44;CD44;CD44;CD44;CD44           | 3.34E-05    | 0.455165526 |
| cg09090724 | TMEM108;TMEM108;TMEM108;TMEM108    | 1.96E-05    | 0.455122217 |
| cg25201047 |                                    | 8.60E-06    | 0.455112109 |
| cg17204129 | CFTR                               | 1.11E-05    | 0.455104187 |
| cg24645214 | RGS20                              | 0.000117986 | 0.455090092 |
| cg27341472 | TMEM196                            | 9.04E-05    | 0.455044686 |
| cg11486133 | GRID2                              | 1.11E-05    | 0.455013312 |
| cg06313119 | FGF14                              | 0.001376172 | 0.454987085 |
| cg26812418 | CPE                                | 1.11E-05    | 0.454976188 |
| cg02746381 | FAM84A;FAM84A                      | 7.23E-05    | 0.454969268 |
| cg02391713 |                                    | 2.08E-05    | 0.454952394 |
| cg01382110 |                                    | 8.60E-06    | 0.454950975 |
| cg08181476 | NCAN                               | 8.60E-06    | 0.454895993 |
| cg13321077 | RESP18                             | 8.60E-06    | 0.454892011 |
| cg22865470 |                                    | 3.34E-05    | 0.454875095 |
| cg10263370 | ZNF502;ZNF502;ZNF502;ZNF502        | 1.50E-05    | 0.454849488 |
| cg08931129 |                                    | 5.59E-05    | 0.454828026 |
| cg04184836 | CPEB1;CPEB1                        | 1.96E-05    | 0.454802613 |
| cg06572160 | KCNC3                              | 3.34E-05    | 0.454776543 |
| cg00667789 | TACSTD2                            | 9.24E-05    | 0.45473843  |
| cg05667348 | VAX1                               | 9.24E-05    | 0.454736543 |
| cg04053392 | DACT2                              | 3.34E-05    | 0.454723941 |
| cg20006924 | RORA                               | 5.11E-05    | 0.454656767 |
| cg25862644 | C10orf41;C10orf41                  | 4.34E-05    | 0.45463714  |
| cg15191798 | LRRC49;THAP10;THAP10               | 8.60E-06    | 0.454606805 |
| cg12036735 |                                    | 0.000187194 | 0.454554639 |
| cg13482209 | CELSR3                             | 2.58E-05    | 0.45455072  |
| cg27584135 |                                    | 0.000290372 | 0.454510077 |
| cg02058408 |                                    | 3.34E-05    | 0.454505249 |
| cg24437715 |                                    | 2.58E-05    | 0.454494295 |
| cg19998368 | C12orf56;C12orf56                  | 7.23E-05    | 0.454437724 |
| cg02973171 | FAM181B                            | 0.000233422 | 0.454434785 |
| cg09141965 |                                    | 5.59E-05    | 0.454391892 |
| cg19883384 |                                    | 3.34E-05    | 0.454362999 |
| cg12409982 |                                    | 8.60E-06    | 0.454349967 |
| cg06002370 | COL4A3;COL4A3;COL4A3;COL4A3;COL4A4 | 1.50E-05    | 0.454324627 |
| cg05560435 |                                    | 4.34E-05    | 0.454320673 |
| cg03568673 | GJB6;GJB6;GJB6;GJB6                | 2.58E-05    | 0.454304224 |
| cg15026241 |                                    | 2.58E-05    | 0.454238055 |
| cg08643994 |                                    | 1.96E-05    | 0.454221769 |
| cg24700959 | ESRRG;ESRRG;ESRRG;ESRRG;ESRRG      | 3.34E-05    | 0.454201122 |
| cg07729537 |                                    | 8.60E-06    | 0.454186879 |
| cg21884421 | IGDCC3                             | 8.60E-06    | 0.454168792 |

|            |                             |             |             |
|------------|-----------------------------|-------------|-------------|
| cg16459364 | NEFM;NEFM                   | 8.60E-06    | 0.454162308 |
| cg22047387 | NEUROD4;NEUROD4             | 1.11E-05    | 0.454142818 |
| cg11064034 |                             | 1.50E-05    | 0.454133156 |
| cg12307787 | KCNB1                       | 0.000122184 | 0.454118239 |
| cg15090727 | SVEP1;SVEP1                 | 8.60E-06    | 0.454113824 |
| cg07861448 | MSC                         | 5.11E-05    | 0.454095126 |
| cg22848646 |                             | 1.96E-05    | 0.454044655 |
| cg14272075 | RNF126P1                    | 5.59E-05    | 0.454025115 |
| cg27072996 | LPPR3                       | 0.000233422 | 0.454017689 |
| cg11039614 | ISL1;ISL1                   | 8.60E-06    | 0.453998428 |
| cg19082230 | ODZ3                        | 5.59E-05    | 0.453992833 |
| cg22879515 | MIR34B;BTG4;MIR34C          | 0.000187194 | 0.453979961 |
| cg25999578 | HOXA9                       | 4.34E-05    | 0.453927113 |
| cg20631750 | BMP7                        | 0.000117986 | 0.453920218 |
| cg17985029 | EYA4;EYA4;EYA4              | 0.000791389 | 0.453917885 |
| cg26551913 | PAX2;PAX2;PAX2;PAX2;PAX2    | 4.34E-05    | 0.453917599 |
| cg23231729 | THEM4                       | 0.000955793 | 0.453910968 |
| cg23434186 | DOK6                        | 8.60E-06    | 0.45389566  |
| cg19754707 |                             | 8.60E-06    | 0.453887339 |
| cg11610350 |                             | 5.59E-05    | 0.45387627  |
| cg08123277 | THRB;THRB;THRB              | 0.000233422 | 0.453875691 |
| cg00046625 | PDE4B;PDE4B                 | 1.11E-05    | 0.453845389 |
| cg23563014 |                             | 1.11E-05    | 0.45381768  |
| cg00462168 | KIAA1024                    | 3.34E-05    | 0.453806161 |
| cg10028217 | CADPS2;CADPS2;CADPS2        | 0.000117986 | 0.453769699 |
| cg26435670 | BMPR1A                      | 0.000187194 | 0.453758543 |
| cg13297865 | ELOVL4                      | 1.50E-05    | 0.453739879 |
| cg16654911 |                             | 8.60E-06    | 0.453737622 |
| cg21042456 |                             | 5.59E-05    | 0.453729046 |
| cg17528648 | OSMR;OSMR;OSMR;OSMR         | 0.000117986 | 0.45371857  |
| cg06573787 |                             | 0.000233422 | 0.453689948 |
| cg19170015 | CXCL1                       | 8.60E-06    | 0.453677424 |
| cg20292547 | BMP7;BMP7                   | 5.59E-05    | 0.453652796 |
| cg15731056 | C12orf56;C12orf56           | 4.34E-05    | 0.453640951 |
| cg16043357 | VAX1;VAX1                   | 7.23E-05    | 0.453561996 |
| cg15060599 |                             | 8.60E-06    | 0.453556584 |
| cg05081498 |                             | 1.11E-05    | 0.453555344 |
| cg08857063 | TFAP2B                      | 0.00041966  | 0.453551438 |
| cg20289688 | MYOD1                       | 2.58E-05    | 0.453506538 |
| cg18734428 | ADAMTSL3                    | 1.50E-05    | 0.453504396 |
| cg11638399 |                             | 9.24E-05    | 0.453483041 |
| cg16749235 | EBF2                        | 4.34E-05    | 0.453451431 |
| cg10836392 | SULT4A1                     | 1.50E-05    | 0.453396061 |
| cg20786074 | EFEMP1;EFEMP1;EFEMP1;EFEMP1 | 1.11E-05    | 0.453383879 |
| cg25514273 | KLHL1;ATXN8OS               | 7.23E-05    | 0.453362418 |
| cg18540492 | AGBL4                       | 1.11E-05    | 0.453352594 |
| cg10074409 | IRF6;IRF6                   | 2.58E-05    | 0.453344707 |
| cg17754510 |                             | 1.50E-05    | 0.453316271 |
| cg14314029 |                             | 3.34E-05    | 0.453304771 |
| cg12302070 | KCNH7;KCNH7                 | 8.60E-06    | 0.453293861 |
| cg02623400 | ELAVL4;ELAVL4               | 2.58E-05    | 0.453285319 |
| cg04895288 |                             | 3.34E-05    | 0.453284213 |
| cg08229358 | NPHS2                       | 1.96E-05    | 0.453280623 |
| cg00270497 | RIPPLY2                     | 1.50E-05    | 0.453270065 |
| cg17790852 | ODZ3                        | 5.59E-05    | 0.453257643 |
| cg14858469 | NR2F2;NR2F2                 | 8.60E-06    | 0.453231413 |
| cg07206208 | LOC100128811;GPR158         | 8.60E-06    | 0.45322339  |
| cg08414570 |                             | 1.11E-05    | 0.453198332 |
| cg24374738 | CRYBA2;CRYBA2;CRYBA2        | 7.23E-05    | 0.453156235 |
| cg14568830 |                             | 8.60E-06    | 0.453150952 |

|            |                                         |             |             |
|------------|-----------------------------------------|-------------|-------------|
| cg04977834 |                                         | 0.000117986 | 0.453134259 |
| cg25345178 |                                         | 8.60E-06    | 0.453092424 |
| cg24762231 | NFE2;NFE2                               | 1.50E-05    | 0.453023758 |
| cg03551161 | OSBP2                                   | 1.96E-05    | 0.453008216 |
| cg27642470 | DCBLD1                                  | 1.11E-05    | 0.45299797  |
| cg25181751 |                                         | 1.50E-05    | 0.452972894 |
| cg25235766 | CACNG8;MIR935                           | 0.001376172 | 0.452947383 |
| cg26398467 |                                         | 1.50E-05    | 0.452944095 |
| cg18451814 | OTX2                                    | 8.60E-06    | 0.452938555 |
| cg08867825 | OLFM3                                   | 2.58E-05    | 0.452919676 |
| cg20249252 |                                         | 9.24E-05    | 0.452918811 |
| cg26608883 | CALCB                                   | 0.000233422 | 0.452890621 |
| cg18781988 | PCDHGA2;PCDHGA3;PCDHGA1;PCDHGA3         | 0.000290372 | 0.452765798 |
| cg20909645 |                                         | 1.96E-05    | 0.452750689 |
| cg26763877 | CSMD1                                   | 5.59E-05    | 0.452725939 |
| cg15837233 | TBR1                                    | 1.60E-05    | 0.452716928 |
| cg18806140 | CTNNA2;CTNNA2                           | 1.50E-05    | 0.452683549 |
| cg16910830 | CNTNAP2                                 | 3.34E-05    | 0.452665774 |
| cg00423153 | SPHKAP;SPHKAP                           | 1.96E-05    | 0.452593128 |
| cg21925310 | SULT4A1                                 | 1.11E-05    | 0.452543224 |
| cg20055426 |                                         | 1.11E-05    | 0.452533721 |
| cg21982950 |                                         | 2.08E-05    | 0.452520571 |
| cg12699371 | GALR1                                   | 1.11E-05    | 0.452394554 |
| cg05372242 | SFTA3                                   | 2.80E-05    | 0.452354764 |
| cg05736768 | DPYS;DPYS                               | 1.11E-05    | 0.452342695 |
| cg13574390 | NTRK1;INSRR                             | 1.18E-05    | 0.452339812 |
| cg11611600 | ADAMTSL3                                | 8.60E-06    | 0.45232179  |
| cg14370314 | EFS;EFS                                 | 5.59E-05    | 0.452301303 |
| cg24418420 | SLC6A15;SLC6A15;SLC6A15;SLC6A15;SLC6A15 | 4.34E-05    | 0.452267794 |
| cg17062829 |                                         | 4.34E-05    | 0.452236106 |
| cg23193759 | C10orf35                                | 9.24E-05    | 0.452218911 |
| cg16566627 | LRAT                                    | 4.34E-05    | 0.452159899 |
| cg24427895 |                                         | 1.11E-05    | 0.452152464 |
| cg25253677 | CACNG8                                  | 0.001948248 | 0.452126671 |
| cg01832005 | C3orf14                                 | 1.11E-05    | 0.452124487 |
| cg19001226 | HOXD1;HOXD1                             | 0.000117986 | 0.452111289 |
| cg06507551 | CTTNBP2                                 | 1.96E-05    | 0.452070479 |
| cg04903759 | WDR49                                   | 1.96E-05    | 0.452059771 |
| cg00926400 | BOLL;BOLL                               | 8.60E-06    | 0.452051421 |
| cg04682193 | KDM2B;KDM2B                             | 1.96E-05    | 0.452049767 |
| cg04222358 |                                         | 8.60E-06    | 0.45204532  |
| cg11165158 | FOXL1                                   | 0.000357885 | 0.452018068 |
| cg11428724 | PAX7;PAX7;PAX7;PAX7;PAX7;PAX7           | 5.59E-05    | 0.451998299 |
| cg17300051 | KCNJ3                                   | 1.96E-05    | 0.451961984 |
| cg07790752 |                                         | 9.24E-05    | 0.451932791 |
| cg21878275 | ADAMTS9                                 | 0.000187194 | 0.45193276  |
| cg20720059 | FAM84A                                  | 9.24E-05    | 0.451903614 |
| cg06617456 | PREX2;PREX2                             | 2.58E-05    | 0.451896013 |
| cg20759084 | ADCY2                                   | 0.000290372 | 0.451869284 |
| cg03902462 | LONRF1                                  | 0.000117986 | 0.451867111 |
| cg03276408 |                                         | 0.002450672 | 0.451862048 |
| cg20318608 | FAM163A                                 | 7.23E-05    | 0.451850364 |
| cg19095600 |                                         | 1.96E-05    | 0.451831116 |
| cg12389770 | GRIK2;GRIK2;GRIK2                       | 9.24E-05    | 0.451803279 |
| cg00393585 | C4orf39;TRIM61                          | 0.000117986 | 0.451783669 |
| cg01764252 |                                         | 0.000187194 | 0.451773383 |
| cg21725716 |                                         | 8.60E-06    | 0.451759496 |
| cg21123160 | SLC6A11                                 | 8.60E-06    | 0.451728729 |
| cg04645070 |                                         | 9.24E-05    | 0.451724997 |
| cg25460753 |                                         | 1.11E-05    | 0.451686273 |



|            |                               |             |             |
|------------|-------------------------------|-------------|-------------|
| cg01502428 | TIMP2                         | 9.24E-05    | 0.451671962 |
| cg10123247 | C8orf85                       | 4.34E-05    | 0.451669831 |
| cg04981088 | MPV17L;MPV17L;MPV17L;MPV17L   | 0.000526175 | 0.451656    |
| cg18897025 | TSLP;TSLP                     | 2.58E-05    | 0.45165235  |
| cg08047376 | CTNNA2;CTNNA2                 | 3.21E-05    | 0.45163529  |
| cg02262553 |                               | 9.24E-05    | 0.451609772 |
| cg13452260 |                               | 1.11E-05    | 0.451600157 |
| cg12258042 | CSMD1;CSMD1                   | 7.23E-05    | 0.451599043 |
| cg18930994 | NPY2R                         | 2.58E-05    | 0.45152955  |
| cg19079845 | PAX1;PAX1                     | 8.60E-06    | 0.451475748 |
| cg09954385 | ARHGAP8;ARHGAP8;PRR5-ARHGAP8  | 2.58E-05    | 0.451453333 |
| cg21784036 | CPNE8                         | 0.000537905 | 0.45144248  |
| cg19039464 | C4orf31;C4orf31               | 0.000117986 | 0.451381648 |
| cg00500359 | OSBPL5;OSBPL5;OSBPL5          | 2.58E-05    | 0.451359744 |
| cg07318073 | CXCL3;CXCL3                   | 0.000148457 | 0.451331784 |
| cg09935045 | PRKAA2                        | 3.34E-05    | 0.451271201 |
| cg11675881 |                               | 9.24E-05    | 0.451262008 |
| cg15827779 | CDC42BPB                      | 4.34E-05    | 0.451251335 |
| cg10524152 | ADRA2A                        | 2.58E-05    | 0.45124322  |
| cg24496475 |                               | 8.60E-06    | 0.451229396 |
| cg17128947 | CPLX1                         | 7.23E-05    | 0.451222476 |
| cg12497564 | RBP1;RBP1;RBP1                | 9.24E-05    | 0.451220746 |
| cg15093079 | EPHA6                         | 4.34E-05    | 0.451144019 |
| cg13368923 |                               | 3.34E-05    | 0.451136503 |
| cg01631764 | SHC2                          | 1.96E-05    | 0.451135101 |
| cg16002818 | BOLL                          | 8.60E-06    | 0.451125586 |
| cg03936663 |                               | 1.50E-05    | 0.451117676 |
| cg18438944 | MT1A                          | 5.59E-05    | 0.451101145 |
| cg17826753 | KCNV1                         | 8.60E-06    | 0.451081351 |
| cg00044107 | COL12A1;COL12A1               | 1.96E-05    | 0.451061693 |
| cg24583615 | UGGT2;UGGT2                   | 1.96E-05    | 0.451057632 |
| cg24207698 | TTC21B                        | 7.23E-05    | 0.451029385 |
| cg23654401 | VOPP1                         | 4.34E-05    | 0.451023798 |
| cg25648746 | RGS7BP                        | 3.34E-05    | 0.451010328 |
| cg21918126 | NRXN3;NRXN3;NRXN3             | 7.23E-05    | 0.450997589 |
| cg23365739 | OTX2;OTX2                     | 1.50E-05    | 0.450993156 |
| cg08448701 | PAX1                          | 1.96E-05    | 0.450992783 |
| cg14258623 |                               | 1.96E-05    | 0.450983088 |
| cg26639039 | SLC12A5;SLC12A5               | 9.24E-05    | 0.450965427 |
| cg24566400 | RBP4                          | 1.96E-05    | 0.450946274 |
| cg13255542 | THYN1;THYN1;THYN1;THYN1;THYN1 | 3.34E-05    | 0.450946149 |
| cg11423323 |                               | 4.34E-05    | 0.450942767 |
| cg18802754 | VSTM2B                        | 0.000262362 | 0.450938788 |
| cg07723130 |                               | 1.50E-05    | 0.450918614 |
| cg20222562 |                               | 7.23E-05    | 0.450911631 |
| cg16172814 | OGDHL;OGDHL;OGDHL             | 1.96E-05    | 0.450858236 |
| cg10164885 | NELL2;NELL2;NELL2;NELL2;NELL2 | 9.24E-05    | 0.450832526 |
| cg07558455 | KANK4                         | 5.59E-05    | 0.450798238 |
| cg09465746 | GRM7;GRM7                     | 2.08E-05    | 0.450783226 |
| cg12338552 |                               | 1.11E-05    | 0.450763879 |
| cg03389653 | CBLN1                         | 3.34E-05    | 0.450722367 |
| cg04022561 |                               | 2.58E-05    | 0.450715266 |
| cg10865087 | BICC1                         | 1.50E-05    | 0.450693321 |
| cg14019317 | PROX1                         | 0.000290372 | 0.45068743  |
| cg20747380 | HOXA2;HOXA2                   | 1.96E-05    | 0.450683142 |
| cg10442325 |                               | 5.59E-05    | 0.450655044 |
| cg24597363 | MAEA;MAEA                     | 4.34E-05    | 0.450609788 |
| cg20047489 |                               | 1.50E-05    | 0.450601299 |
| cg12897942 | EIF5A2;EIF5A2                 | 1.11E-05    | 0.450561174 |
| cg06839631 |                               | 2.58E-05    | 0.450528234 |

|            |                                   |             |             |
|------------|-----------------------------------|-------------|-------------|
| cg18300589 | PLK5P                             | 1.18E-05    | 0.450525652 |
| cg23730181 |                                   | 2.58E-05    | 0.450521708 |
| cg09498572 |                                   | 3.34E-05    | 0.450511005 |
| cg05981335 | MYF6                              | 8.60E-06    | 0.450502798 |
| cg02604290 | CYP24A1;CYP24A1                   | 7.23E-05    | 0.450497295 |
| cg23816347 | CCDC37                            | 1.50E-05    | 0.450492833 |
| cg22374233 | ADCYAP1;ADCYAP1                   | 8.60E-06    | 0.450492743 |
| cg11058154 | FAM20A                            | 0.000117986 | 0.450458024 |
| cg08983097 | VGLL2;VGLL2                       | 1.11E-05    | 0.450457701 |
| cg25349154 | LOC642597                         | 8.60E-06    | 0.450444544 |
| cg26649384 | RPRM;RPRM                         | 0.000148457 | 0.450374206 |
| cg01280202 | BTC                               | 0.000148457 | 0.450346834 |
| cg14704758 |                                   | 8.60E-06    | 0.450300711 |
| cg03070297 | DOCK1;FAM196A                     | 4.34E-05    | 0.450267143 |
| cg03181899 | PDLIM3;PDLIM3                     | 1.11E-05    | 0.450259402 |
| cg07035961 | PCDHA1;PCDHA1;PCDHA2;PCDHA2       | 2.58E-05    | 0.450255486 |
| cg07329360 |                                   | 8.60E-06    | 0.450254546 |
| cg18029761 | GPR123                            | 7.23E-05    | 0.450249635 |
| cg09880551 | DSCAM;DSCAM                       | 3.34E-05    | 0.450242933 |
| cg07401324 | PTPRJ;PTPRJ                       | 4.34E-05    | 0.450233811 |
| cg04799343 |                                   | 8.60E-06    | 0.450232992 |
| cg12071888 |                                   | 5.59E-05    | 0.450211291 |
| cg19909349 | LAMA1                             | 3.34E-05    | 0.450201228 |
| cg04707332 | TBX15                             | 4.34E-05    | 0.450174779 |
| cg13933080 | SPAG6;SPAG6                       | 1.11E-05    | 0.450141332 |
| cg07548607 | ZSWIM2                            | 4.34E-05    | 0.450127407 |
| cg10472919 | FBXL21                            | 1.50E-05    | 0.450094139 |
| cg15688918 | PLAC2                             | 2.58E-05    | 0.450089856 |
| cg04759439 | ERC2                              | 1.11E-05    | 0.450086515 |
| cg17279458 | ZNF502;ZNF502;ZNF502;ZNF502       | 4.34E-05    | 0.450081959 |
| cg26848524 |                                   | 2.58E-05    | 0.450075965 |
| cg20607287 | VWDE                              | 8.60E-06    | 0.450003125 |
| cg01889143 |                                   | 0.001147425 | 0.449957887 |
| cg11213520 | LHX5                              | 2.58E-05    | 0.44991211  |
| cg23895340 | HOXD11                            | 8.60E-06    | 0.449900866 |
| cg14456683 | ZIC1                              | 4.34E-05    | 0.449888328 |
| cg15228694 | CYB5R2                            | 4.34E-05    | 0.449873066 |
| cg26938272 | SIM2;SIM2                         | 0.000148457 | 0.449856925 |
| cg06522681 | CCDC105;CCDC105                   | 1.11E-05    | 0.449845772 |
| cg07536910 | EVX2                              | 2.58E-05    | 0.449840241 |
| cg19589939 |                                   | 1.50E-05    | 0.449826223 |
| cg13557668 | FBXL21                            | 7.23E-05    | 0.44982501  |
| cg27642554 | GRM1;GRM1                         | 1.96E-05    | 0.449818098 |
| cg17996619 | NKX6-2                            | 8.60E-06    | 0.44981432  |
| cg02908900 | MEOX2                             | 5.59E-05    | 0.449758891 |
| cg07995179 |                                   | 3.34E-05    | 0.449717869 |
| cg25437886 | LIMD1                             | 0.000537905 | 0.449712589 |
| cg18159840 | CASR;CASR                         | 1.11E-05    | 0.449700008 |
| cg22534145 | SSTR4                             | 2.58E-05    | 0.449686709 |
| cg03521656 | TMC5;TMC5;TMC5;TMC5               | 3.34E-05    | 0.449675109 |
| cg24575234 | CHRM2;CHRM2;CHRM2;CHRM2;CHRM2;CHR | 8.60E-06    | 0.449660841 |
| cg18040241 | GLB1L2                            | 1.96E-05    | 0.449647221 |
| cg08871855 | FOXI3                             | 7.23E-05    | 0.449647089 |
| cg13952840 |                                   | 1.96E-05    | 0.449615466 |
| cg03332469 |                                   | 8.60E-06    | 0.449568603 |
| cg26116542 |                                   | 1.50E-05    | 0.449513485 |
| cg26256401 |                                   | 4.34E-05    | 0.449492413 |
| cg16987524 | FBLN7;FBLN7                       | 8.60E-06    | 0.449490559 |
| cg14001023 | PGLYRP1;PGLYRP1                   | 9.24E-05    | 0.449470623 |
| cg25585712 |                                   | 2.58E-05    | 0.449439009 |

|            |                                 |             |             |
|------------|---------------------------------|-------------|-------------|
| cg07557260 | ADCY8                           | 8.60E-06    | 0.449413999 |
| cg17524017 | SULF1;SULF1;SULF1;SULF1         | 1.96E-05    | 0.449392014 |
| cg25102370 | HAND2;NBLA00301;HAND2           | 1.11E-05    | 0.449370168 |
| cg03679565 | IRX4;IRX4                       | 1.11E-05    | 0.449366369 |
| cg14985891 | CASQ2                           | 0.000117986 | 0.449366071 |
| cg20435725 |                                 | 9.24E-05    | 0.449347115 |
| cg04497176 | WTIP                            | 9.24E-05    | 0.44934294  |
| cg12708634 | KITLG;KITLG                     | 1.50E-05    | 0.449322909 |
| cg05760402 |                                 | 8.60E-06    | 0.449316128 |
| cg22381196 | DHODH                           | 4.34E-05    | 0.449301729 |
| cg27143688 |                                 | 0.000233422 | 0.449293418 |
| cg24769821 | PTH2R                           | 1.11E-05    | 0.449292394 |
| cg19133221 | B4GALNT2;B4GALNT2;B4GALNT2      | 1.11E-05    | 0.449257836 |
| cg05383490 | FAM155A;FAM155A                 | 1.50E-05    | 0.449253386 |
| cg19876672 | VAX1                            | 1.50E-05    | 0.449242293 |
| cg26086468 |                                 | 8.60E-06    | 0.449214297 |
| cg02002551 | NEFM;NEFM                       | 0.000148457 | 0.449200924 |
| cg14983586 |                                 | 1.50E-05    | 0.449200455 |
| cg12541454 |                                 | 1.96E-05    | 0.449179486 |
| cg27316626 | KCNB2                           | 8.60E-06    | 0.449176357 |
| cg04945735 | PDLIM3;PDLIM3                   | 8.60E-06    | 0.449174381 |
| cg26718878 |                                 | 0.001948248 | 0.449122287 |
| cg16504626 |                                 | 3.34E-05    | 0.4491192   |
| cg26789732 | KCNB2                           | 0.000233422 | 0.449118414 |
| cg11699435 | SOX21                           | 1.11E-05    | 0.449116891 |
| cg11698888 |                                 | 3.34E-05    | 0.449113975 |
| cg18058689 | GPC6;GPC6                       | 0.000357885 | 0.449107671 |
| cg09022993 | SPATA18                         | 3.34E-05    | 0.449101132 |
| cg06766427 | RICH2                           | 0.000148457 | 0.449083307 |
| cg16718624 | ROBO2;ROBO2                     | 8.60E-06    | 0.449080322 |
| cg21656205 | RIMS4                           | 0.000290372 | 0.449067857 |
| cg21856256 |                                 | 8.60E-06    | 0.449062175 |
| cg00604202 |                                 | 8.60E-06    | 0.44905397  |
| cg04612444 | PENK;PENK                       | 3.34E-05    | 0.449016319 |
| cg18177533 | KDR                             | 9.24E-05    | 0.449005747 |
| cg19990744 | AIFM3;AIFM3;AIFM3;AIFM3         | 8.60E-06    | 0.448988423 |
| cg23805357 | LOC100128811;GPR158             | 1.96E-05    | 0.448980275 |
| cg11250773 | PNPLA5                          | 2.58E-05    | 0.448972655 |
| cg20944305 | P2RY1                           | 0.000233422 | 0.448955774 |
| cg01915609 | RAB32                           | 9.24E-05    | 0.448955324 |
| cg10721834 |                                 | 8.60E-06    | 0.448947989 |
| cg09656389 | PAX6                            | 1.50E-05    | 0.448919285 |
| cg10406295 | SFRP1                           | 8.60E-06    | 0.448910162 |
| cg04730794 | DOCK2                           | 1.96E-05    | 0.448885869 |
| cg19384531 | TFAP2D                          | 1.96E-05    | 0.448878672 |
| cg21816539 | GRIK1;GRIK1                     | 8.60E-06    | 0.448873228 |
| cg12670347 | TBX5;TBX5                       | 1.11E-05    | 0.448872149 |
| cg00913949 | ESRRG                           | 2.58E-05    | 0.448870466 |
| cg16181396 | ZIC1                            | 8.60E-06    | 0.44885764  |
| cg11821068 |                                 | 7.23E-05    | 0.448824066 |
| cg27225309 | IKZF2;IKZF2                     | 1.50E-05    | 0.448782984 |
| cg00375819 | SLC6A1                          | 7.23E-05    | 0.448772343 |
| cg15228928 |                                 | 0.000148457 | 0.44877048  |
| cg09727050 | TNFAIP6;TNFAIP6                 | 4.34E-05    | 0.448756041 |
| cg26290632 | CALB1                           | 2.58E-05    | 0.44870713  |
| cg04181546 |                                 | 1.11E-05    | 0.448683454 |
| cg17319486 | BRUNOL4;BRUNOL4;BRUNOL4;BRUNOL4 | 3.34E-05    | 0.448682831 |
| cg20242427 | DAK                             | 7.23E-05    | 0.448656664 |
| cg11131532 | KCNB1                           | 7.23E-05    | 0.448648386 |
| cg20495645 | PHF21B;PHF21B                   | 3.34E-05    | 0.448638635 |

|             |                               |             |             |
|-------------|-------------------------------|-------------|-------------|
| cg03242819  | DOCK1;FAM196A                 | 0.000117986 | 0.448630275 |
| cg24507144  | FGF14                         | 0.000290372 | 0.448560473 |
| cg02657401  |                               | 0.000117986 | 0.448511554 |
| cg13320291  | GFRA1;GFRA1;GFRA1             | 0.000955793 | 0.448501745 |
| cg13618516  | AATK                          | 1.50E-05    | 0.44849351  |
| cg18914514  | GREB1L                        | 2.58E-05    | 0.448479574 |
| cg00554413  | TACSTD2                       | 8.60E-06    | 0.448447207 |
| cg00334063  | ZIC4;ZIC4;ZIC4;ZIC4;ZIC4      | 5.59E-05    | 0.44842733  |
| cg16003102  |                               | 1.96E-05    | 0.448374579 |
| cg17037963  |                               | 2.58E-05    | 0.448368827 |
| cg22696167  |                               | 1.11E-05    | 0.448355543 |
| cg26783127  | AATK                          | 5.59E-05    | 0.448350126 |
| cg12338417  | TRIM71                        | 2.58E-05    | 0.44833919  |
| cg20523861  | KLHL1;KLHL1;ATXN8OS           | 5.59E-05    | 0.448332213 |
| cg14658804  | SLIT3                         | 0.000187194 | 0.44832147  |
| cg23847712  | DRD5                          | 0.000233422 | 0.448298359 |
| cg05200037  | ZC3H12D                       | 5.59E-05    | 0.448289703 |
| cg10196720  | PCDH10;PCDH10                 | 9.24E-05    | 0.448282865 |
| cg27533288  | VAX1;VAX1                     | 2.58E-05    | 0.448282045 |
| cg13977235  |                               | 0.000117986 | 0.448262255 |
| cg08169394  | SHISA6                        | 4.34E-05    | 0.448236297 |
| cg241139093 |                               | 8.60E-06    | 0.448225819 |
| cg15075988  | VDAC2                         | 5.59E-05    | 0.448219816 |
| cg00209038  | LHCGR                         | 1.11E-05    | 0.448218844 |
| cg27495903  | NEBL;NEBL                     | 0.000187194 | 0.448193771 |
| cg02861071  | OLFM3;OLFM3                   | 1.96E-05    | 0.448187952 |
| cg16262614  | TF                            | 9.24E-05    | 0.448162548 |
| cg06804312  | FGF12                         | 5.59E-05    | 0.448128039 |
| cg24626554  | LOC389458                     | 7.23E-05    | 0.448109027 |
| cg06647751  |                               | 1.50E-05    | 0.448108645 |
| cg00875511  | TACR3                         | 8.60E-06    | 0.448084043 |
| cg22735222  | NKX2-3                        | 0.000148457 | 0.448083567 |
| cg02862467  | UBR4                          | 0.000117986 | 0.44794561  |
| cg09303642  | NFE2;NFE2                     | 4.34E-05    | 0.447939194 |
| cg20698924  | OCA2                          | 5.59E-05    | 0.447910908 |
| cg13944175  | HAS1                          | 1.50E-05    | 0.447904022 |
| cg27297576  |                               | 1.11E-05    | 0.447887382 |
| cg00741836  | DOK5                          | 9.24E-05    | 0.447870746 |
| cg02501779  | CBLN4;CBLN4                   | 1.11E-05    | 0.447866731 |
| cg11284147  |                               | 0.000117986 | 0.447836592 |
| cg07462540  | NXPH1                         | 7.23E-05    | 0.447770185 |
| cg18236477  | ATP8A2                        | 7.23E-05    | 0.447768982 |
| cg15847198  | GUCY1A2                       | 0.000233422 | 0.447760422 |
| cg22480742  | CALD1;CALD1;CALD1;CALD1;CALD1 | 0.000290372 | 0.447715579 |
| cg14186937  | TRPC6                         | 5.59E-05    | 0.447714688 |
| cg13601435  |                               | 0.000290372 | 0.447705516 |
| cg16184803  | PITX2;PITX2;PITX2             | 8.60E-06    | 0.447670425 |
| cg12307306  | KY                            | 1.50E-05    | 0.44766579  |
| cg11379081  |                               | 3.34E-05    | 0.447658329 |
| cg07859439  | PGAP1                         | 0.000187194 | 0.447630899 |
| cg16817826  | FEZF2                         | 0.001376172 | 0.447587797 |
| cg18274480  |                               | 1.11E-05    | 0.447574373 |
| cg07028821  |                               | 0.000233422 | 0.447550224 |
| cg11671688  | GPR6                          | 1.96E-05    | 0.447531983 |
| cg19224713  | SAMD12;SAMD12                 | 0.000187194 | 0.447485412 |
| cg20634967  |                               | 0.003189589 | 0.447468196 |
| cg17435266  |                               | 2.58E-05    | 0.447458969 |
| cg15397374  | EFCAB1;EFCAB1;EFCAB1          | 8.60E-06    | 0.447430478 |
| cg20892260  | NKX2-6                        | 9.24E-05    | 0.447429415 |
| cg07434271  | PAX6                          | 3.34E-05    | 0.447422802 |

|            |                                               |             |             |
|------------|-----------------------------------------------|-------------|-------------|
| cg02381539 |                                               | 3.34E-05    | 0.447415052 |
| cg19438674 | GRID1                                         | 1.50E-05    | 0.447411493 |
| cg04876835 | PRKAA2                                        | 0.000158823 | 0.447394221 |
| cg08576864 | GPM6A;GPM6A                                   | 9.04E-05    | 0.447390354 |
| cg14730085 | FBXO27                                        | 0.000148457 | 0.447335351 |
| cg19861117 | NOVA2                                         | 1.96E-05    | 0.447324636 |
| cg16125725 |                                               | 5.59E-05    | 0.447301694 |
| cg07275179 | ATXN7;ATXN7                                   | 3.34E-05    | 0.447266558 |
| cg16826874 | DOCK5                                         | 0.000148457 | 0.447263276 |
| cg02202980 | C3orf15;C3orf15                               | 0.000187194 | 0.447239047 |
| cg24394172 | GABRA4                                        | 2.58E-05    | 0.447236502 |
| cg21285555 | PCMTD1                                        | 2.58E-05    | 0.447230485 |
| cg02854695 | KCNC3                                         | 1.11E-05    | 0.447227883 |
| cg23956737 | CADPS2;CADPS2;CADPS2                          | 0.000148457 | 0.44722713  |
| cg01857829 | CDH1                                          | 0.000290372 | 0.447199028 |
| cg21821833 | CCK                                           | 8.60E-06    | 0.447190651 |
| cg17491850 | DAB1                                          | 8.60E-06    | 0.447168382 |
| cg26327071 | HOXB4                                         | 0.000117986 | 0.447150512 |
| cg07251711 | NKX6-2                                        | 8.60E-06    | 0.447115168 |
| cg05886087 |                                               | 2.58E-05    | 0.447103891 |
| cg10527010 | SLC6A11                                       | 1.11E-05    | 0.447103706 |
| cg18588589 |                                               | 1.60E-05    | 0.447101223 |
| cg23650423 | TRPC6                                         | 1.50E-05    | 0.447090535 |
| cg19610529 |                                               | 1.11E-05    | 0.447082106 |
| cg27185978 | DOCK5                                         | 5.59E-05    | 0.447075807 |
| cg26730369 | ADRA1A;ADRA1A;ADRA1A;ADRA1A                   | 7.23E-05    | 0.447065909 |
| cg05783915 | EMX2;EMX2;EMX2OS;EMX2;EMX2                    | 7.23E-05    | 0.447048961 |
| cg19502867 | FAM110B                                       | 0.003154996 | 0.447033476 |
| cg00613752 | GPR6;GPR6                                     | 8.60E-06    | 0.44700008  |
| cg10507275 | LRRN1;LRRN1                                   | 0.000233422 | 0.446980343 |
| cg14473102 | HOXD8                                         | 0.000537905 | 0.446950878 |
| cg01370541 |                                               | 1.11E-05    | 0.446914966 |
| cg14268557 | TRIM27                                        | 2.58E-05    | 0.446891694 |
| cg18184411 | ZYG11A                                        | 8.60E-06    | 0.446890575 |
| cg10116864 | CDK5R2;CDK5R2                                 | 1.96E-05    | 0.446873282 |
| cg12744859 | LOC404266;HOXB5;LOC404266;LOC404266;LOC404266 | 0.000357885 | 0.446857428 |
| cg09793121 | OLIG2;OLIG2                                   | 4.34E-05    | 0.446855474 |
| cg07912789 | PRMT8                                         | 9.24E-05    | 0.446833078 |
| cg15759056 | ABCB1                                         | 1.96E-05    | 0.446817061 |
| cg06092815 | SPHKAP;SPHKAP                                 | 8.60E-06    | 0.446804801 |
| cg18543270 | EPB41L3                                       | 9.24E-05    | 0.446766631 |
| cg13951042 | COL4A3;COL4A3;COL4A3;COL4A3;COL4A3;COL4A3     | 1.96E-05    | 0.44675878  |
| cg07576142 | GPC6                                          | 0.000148457 | 0.446743587 |
| cg24686551 |                                               | 7.23E-05    | 0.446728253 |
| cg11014468 | DCP1A                                         | 1.50E-05    | 0.446692315 |
| cg12368612 |                                               | 8.60E-06    | 0.446654892 |
| cg16174029 | PCDHAC2;PCDHAC2;PCDHA7;PCDHA12;PCDHA12        | 5.59E-05    | 0.446621222 |
| cg02631838 | HPCA                                          | 4.34E-05    | 0.446610617 |
| cg09713234 | MKX                                           | 8.60E-06    | 0.446589355 |
| cg07700233 |                                               | 3.34E-05    | 0.446573393 |
| cg25062797 | VAX1;VAX1                                     | 8.60E-06    | 0.446568585 |
| cg11710851 |                                               | 8.60E-06    | 0.446536993 |
| cg27598107 |                                               | 8.60E-06    | 0.446531593 |
| cg24262066 | ADAMTS1                                       | 9.24E-05    | 0.446501315 |
| cg24083324 | PROX1                                         | 0.000187194 | 0.446497998 |
| cg21546184 |                                               | 1.11E-05    | 0.446427964 |
| cg00240734 | SLC35F1                                       | 7.23E-05    | 0.446408933 |
| cg01491219 | C1orf115                                      | 0.000537905 | 0.446350996 |
| cg26342078 |                                               | 8.60E-06    | 0.446330552 |
| cg14419187 | UNC80;UNC80                                   | 5.59E-05    | 0.446290517 |

|            |                              |             |             |
|------------|------------------------------|-------------|-------------|
| cg07791011 |                              | 7.23E-05    | 0.446286693 |
| cg20787173 | EYA4;EYA4;EYA4               | 0.000187194 | 0.446257451 |
| cg21170041 | GDA;GDA                      | 1.50E-05    | 0.446235088 |
| cg24079727 | TCF12;TCF12;TCF12;TCF12      | 3.34E-05    | 0.446222965 |
| cg09848096 |                              | 0.000148457 | 0.446172283 |
| cg00690431 | PTGS2                        | 1.11E-05    | 0.446129721 |
| cg15140703 | STAG3;GPC2                   | 0.000357885 | 0.446110135 |
| cg00358442 | DPY19L2P4                    | 1.50E-05    | 0.446092336 |
| cg23745290 | PPA2;PPA2;PPA2;PPA2;PPA2     | 3.34E-05    | 0.446090148 |
| cg07283015 | HRH4;HRH4;HRH4               | 1.50E-05    | 0.44603023  |
| cg10911619 | TBC1D12                      | 1.50E-05    | 0.446028427 |
| cg03730428 |                              | 8.60E-06    | 0.446025942 |
| cg25919177 |                              | 0.000233422 | 0.446018025 |
| cg05455720 | MIR124-2                     | 8.60E-06    | 0.446014515 |
| cg10141715 | SLC5A8                       | 8.60E-06    | 0.445941724 |
| cg06065125 |                              | 8.60E-06    | 0.445918131 |
| cg00824018 | INA                          | 1.11E-05    | 0.445893844 |
| cg00318320 | BOK                          | 0.000233422 | 0.445868604 |
| cg15446670 | ABC1;RUNDC3B;RUNDC3B;RUNDC3B | 0.000117986 | 0.445857947 |
| cg19166660 | DAB1                         | 7.23E-05    | 0.445841067 |
| cg05266564 |                              | 1.11E-05    | 0.445820159 |
| cg14022913 | NEIL3                        | 1.11E-05    | 0.445794068 |
| cg18450168 | TACC2;TACC2                  | 0.000290372 | 0.445785817 |
| cg20025003 | TFCP2L1                      | 0.000791389 | 0.445749157 |
| cg08505243 |                              | 8.60E-06    | 0.445736017 |
| cg25023058 | TEKT3                        | 8.60E-06    | 0.445731095 |
| cg16438655 | DOC2B                        | 7.23E-05    | 0.445727627 |
| cg21102477 | CSMD2                        | 1.96E-05    | 0.44572119  |
| cg06062984 |                              | 1.50E-05    | 0.445718894 |
| cg00754253 | HRASLS5;HRASLS5;HRASLS5      | 0.001376172 | 0.445697673 |
| cg21357291 |                              | 5.59E-05    | 0.445688839 |
| cg07124687 |                              | 0.005897668 | 0.445684777 |
| cg02987928 |                              | 8.60E-06    | 0.445622959 |
| cg00988148 |                              | 2.58E-05    | 0.445622796 |
| cg14894848 | FAM19A5                      | 8.60E-06    | 0.445617046 |
| cg22689833 |                              | 0.000148457 | 0.445571019 |
| cg16884042 | SGPP2                        | 1.50E-05    | 0.445571004 |
| cg17206393 | TRPC4AP;TRPC4AP              | 0.000290372 | 0.445569127 |
| cg11717507 | TBX5;TBX5;TBX5;TBX5          | 5.59E-05    | 0.445554597 |
| cg23051578 | TMEM74                       | 3.34E-05    | 0.445530282 |
| cg22616881 | DLX6AS                       | 1.50E-05    | 0.445530186 |
| cg05079049 |                              | 2.58E-05    | 0.445484612 |
| cg06304401 | NLGN1                        | 0.000148457 | 0.445435967 |
| cg00333512 |                              | 7.23E-05    | 0.445433809 |
| cg14583606 | SLC1A1                       | 0.000117986 | 0.445409628 |
| cg17298751 | SLC17A6                      | 1.11E-05    | 0.445392711 |
| cg02773433 | GPR83                        | 1.11E-05    | 0.445390632 |
| cg13942157 | FAM189A1                     | 3.34E-05    | 0.445373057 |
| cg18016365 | GABRB1;GABRB1                | 1.11E-05    | 0.445365251 |
| cg11017382 | MAST4;MAST4                  | 0.000537905 | 0.445358747 |
| cg21164131 | AVPR1A;AVPR1A                | 2.58E-05    | 0.445353048 |
| cg09227138 | SNAP91;SNAP91                | 8.60E-06    | 0.445351444 |
| cg22187630 | CACNA1A;CACNA1A              | 8.60E-06    | 0.44534895  |
| cg25079102 | TBX5;TBX5;TBX5;TBX5          | 1.50E-05    | 0.445328004 |
| cg00012397 | KCNC1;KCNC1                  | 0.000290372 | 0.445310003 |
| cg09535475 | EML4;EML4                    | 4.34E-05    | 0.445305949 |
| cg27019126 | RAX                          | 1.96E-05    | 0.44529181  |
| cg03052869 | GRID1                        | 0.000187194 | 0.445257994 |
| cg17230874 |                              | 9.24E-05    | 0.445250613 |
| cg24826696 | FOXI2                        | 1.96E-05    | 0.445226593 |

|            |                                   |             |             |
|------------|-----------------------------------|-------------|-------------|
| cg01593834 | POU4F3                            | 4.34E-05    | 0.445214894 |
| cg02551743 | MEIS1                             | 8.60E-06    | 0.445202127 |
| cg24717159 | SLC27A2;SLC27A2                   | 1.96E-05    | 0.445151406 |
| cg20677901 | TP73                              | 7.23E-05    | 0.445090773 |
| cg04118119 | ESD                               | 5.59E-05    | 0.445070756 |
| cg16793394 | OTX2                              | 8.60E-06    | 0.445070286 |
| cg06907418 | TRPV3                             | 2.58E-05    | 0.44505597  |
| cg06312813 | CXCL2                             | 0.000187194 | 0.445054726 |
| cg10740902 | KDR;KDR                           | 3.34E-05    | 0.445021831 |
| cg09767602 | ODZ3                              | 5.59E-05    | 0.445005761 |
| cg19439706 | TRPA1                             | 1.11E-05    | 0.444984788 |
| cg17023770 | PCDHB15                           | 8.60E-06    | 0.444971168 |
| cg20585869 | NEFM;NEFM                         | 0.000187194 | 0.444969492 |
| cg06226256 |                                   | 8.60E-06    | 0.444953678 |
| cg04442576 | SLC35F1                           | 1.50E-05    | 0.444941524 |
| cg14777768 | SLC2A2                            | 5.59E-05    | 0.444932182 |
| cg11419506 | MKX                               | 1.96E-05    | 0.444922546 |
| cg12071328 | NELL1;NELL1                       | 0.000537905 | 0.444912135 |
| cg00705730 | NCK2;NCK2                         | 8.60E-06    | 0.444883409 |
| cg00630958 | LEPR;LEPR;LEPR                    | 1.50E-05    | 0.444870071 |
| cg16787600 | SORCS3;SORCS3                     | 8.60E-06    | 0.444867588 |
| cg09601770 | DPP4;DPP4                         | 0.001147425 | 0.444837556 |
| cg02447229 | TMEM181                           | 0.00043997  | 0.444828038 |
| cg10741153 |                                   | 1.11E-05    | 0.444827191 |
| cg21814550 |                                   | 1.11E-05    | 0.444816415 |
| cg17799946 |                                   | 1.50E-05    | 0.444791543 |
| cg11054631 | LOC283392;TRHDE;LOC283392         | 7.23E-05    | 0.444789288 |
| cg09873164 | CRCT1                             | 0.000233422 | 0.444788848 |
| cg05273205 |                                   | 1.50E-05    | 0.444782219 |
| cg13582816 |                                   | 8.60E-06    | 0.444715755 |
| cg04922681 | TNFSF11;TNFSF11                   | 0.000654035 | 0.444712888 |
| cg11762839 | USH1C;USH1C;USH1C;USH1C           | 7.23E-05    | 0.444632822 |
| cg10453719 | MARCH1                            | 1.50E-05    | 0.44461812  |
| cg25586069 | KIAA1598;KIAA1598                 | 2.58E-05    | 0.444596045 |
| cg15301489 | XKR6                              | 0.000290372 | 0.444586652 |
| cg20090108 | GRM5;GRM5                         | 1.96E-05    | 0.444549758 |
| cg11722183 | CPE                               | 2.58E-05    | 0.444544644 |
| cg11805669 |                                   | 0.000187194 | 0.444543679 |
| cg09302895 | GBX2                              | 8.60E-06    | 0.444475431 |
| cg14959580 |                                   | 1.11E-05    | 0.444464779 |
| cg20686479 | NAV2;NAV2;LOC100126784;NAV2       | 0.001061731 | 0.444444207 |
| cg15427886 |                                   | 0.000148457 | 0.444428286 |
| cg24789180 |                                   | 1.96E-05    | 0.444423834 |
| cg05852008 | EYA2;EYA2;EYA2;EYA2               | 7.23E-05    | 0.444411447 |
| cg05687686 | MIR1258;ZNF385B                   | 1.50E-05    | 0.444393116 |
| cg22160448 | TLX3                              | 5.59E-05    | 0.444338386 |
| cg02098075 | EFCAB1;EFCAB1;EFCAB1              | 0.000117986 | 0.444328645 |
| cg21068269 | SLC6A15;SLC6A15;SLC6A15           | 3.34E-05    | 0.444313118 |
| cg17061244 | LIN7A                             | 1.11E-05    | 0.444311258 |
| cg12395205 | CIDEA;CIDEA                       | 5.11E-05    | 0.444301597 |
| cg04865491 |                                   | 1.96E-05    | 0.444288755 |
| cg19719547 | PLD5                              | 4.34E-05    | 0.44425297  |
| cg07664198 | CHRM2;CHRM2;CHRM2;CHRM2;CHRM2;CHR | 8.60E-06    | 0.444249702 |
| cg25616547 |                                   | 8.60E-06    | 0.444244173 |
| cg26076724 |                                   | 9.24E-05    | 0.444217301 |
| cg00802728 | LHX5                              | 4.34E-05    | 0.444199417 |
| cg03778909 | TBCD                              | 1.96E-05    | 0.444183972 |
| cg16689800 | PPAPDC1A                          | 0.000117986 | 0.444161009 |
| cg05616999 | RIPK4                             | 8.60E-06    | 0.444157052 |
| cg15661753 |                                   | 0.000290372 | 0.444111291 |

|            |                                    |             |             |
|------------|------------------------------------|-------------|-------------|
| cg24519084 | ACTC1;ACTC1                        | 1.96E-05    | 0.4440741   |
| cg26832294 | TNIP3;TNIP3                        | 0.00043997  | 0.444043032 |
| cg09559047 | XKR6                               | 0.000537905 | 0.444016227 |
| cg06245037 | ALX4                               | 1.96E-05    | 0.443982183 |
| cg23920953 | C14orf162                          | 9.24E-05    | 0.443981813 |
| cg17674725 | LYPD1;LYPD1                        | 4.34E-05    | 0.443963857 |
| cg19472098 | IQSEC3                             | 2.58E-05    | 0.44396126  |
| cg04773818 | NRG1                               | 2.58E-05    | 0.443931835 |
| cg11596902 |                                    | 5.59E-05    | 0.443914516 |
| cg09009536 | EPHA5;EPHA5                        | 8.60E-06    | 0.443913949 |
| cg22057050 | KIAA1310;KIAA1310                  | 3.34E-05    | 0.443905614 |
| cg17448336 |                                    | 1.50E-05    | 0.443882006 |
| cg25478600 | KCNQ1DN                            | 5.78E-05    | 0.443857516 |
| cg00168694 | ETS2                               | 3.34E-05    | 0.443813996 |
| cg20426866 | TACC2;TACC2;TACC2;TACC2            | 0.000187194 | 0.443746019 |
| cg18991549 | PCDHAC2;PCDHAC2;PCDHA7;PCDHA12;PCD | 5.59E-05    | 0.443726014 |
| cg24967811 | PITPNM2                            | 0.000357885 | 0.443713828 |
| cg18780288 | XPNPEP1;XPNPEP1;XPNPEP1            | 9.24E-05    | 0.443699243 |
| cg00927554 | USP44;USP44                        | 8.60E-06    | 0.443666486 |
| cg02538681 | ANKRD22                            | 4.34E-05    | 0.443656165 |
| cg16325777 |                                    | 0.000117986 | 0.443649203 |
| cg12083217 | RAX                                | 1.96E-05    | 0.443563987 |
| cg18770350 | ACTN2;ACTN2                        | 9.24E-05    | 0.443562792 |
| cg13753351 | PSMB7                              | 3.34E-05    | 0.443554037 |
| cg04210284 | SLC6A3                             | 8.60E-06    | 0.443541347 |
| cg13980609 |                                    | 1.96E-05    | 0.443537964 |
| cg20557687 | EDNRA;EDNRA;EDNRA;EDNRA;EDNRA      | 3.34E-05    | 0.443477967 |
| cg04974290 |                                    | 2.58E-05    | 0.443465077 |
| cg07961015 |                                    | 1.11E-05    | 0.443425266 |
| cg05436231 | CD164L2;CD164L2                    | 7.23E-05    | 0.443423432 |
| cg00549910 | CTNNA2;LRRTM1;CTNNA2               | 2.58E-05    | 0.44341713  |
| cg21896766 | CSMD3;CSMD3                        | 8.60E-06    | 0.443416573 |
| cg13895867 | GBX2                               | 0.000233422 | 0.443392851 |
| cg11260097 |                                    | 5.59E-05    | 0.443392489 |
| cg24221947 | NPAS2                              | 5.59E-05    | 0.443377783 |
| cg10552126 | DPP6;DPP6;DPP6                     | 8.60E-06    | 0.443372046 |
| cg15108705 | KCNK1                              | 9.24E-05    | 0.443323112 |
| cg06948294 | STXBP6;STXBP6                      | 4.34E-05    | 0.443311486 |
| cg23664186 | FOXA1                              | 4.34E-05    | 0.4433042   |
| cg03594078 | PIWIL2;PIWIL2                      | 0.000187194 | 0.443287469 |
| cg20061155 | RSPO2                              | 1.50E-05    | 0.443283513 |
| cg06132028 | EYA4;EYA4;EYA4                     | 0.00041966  | 0.443281674 |
| cg20974724 | FEZF1;FEZF1                        | 3.34E-05    | 0.443265208 |
| cg10362542 | HRNBP3                             | 0.000357885 | 0.44322625  |
| cg16201674 | SOX21                              | 3.34E-05    | 0.443198134 |
| cg20905516 | GUCY1A2                            | 0.000365373 | 0.443173359 |
| cg01711160 | FLRT2;FLRT2                        | 8.60E-06    | 0.443161016 |
| cg16334314 | SNAP91;SNAP91                      | 0.000187194 | 0.443158936 |
| cg13051977 | C1orf228                           | 0.000117986 | 0.443120446 |
| cg09184832 |                                    | 1.96E-05    | 0.443108477 |
| cg14472384 |                                    | 1.96E-05    | 0.443105413 |
| cg19788831 | DBX2                               | 1.50E-05    | 0.44309471  |
| cg07783282 | USP44;USP44                        | 5.59E-05    | 0.443089168 |
| cg02318784 |                                    | 4.34E-05    | 0.44307948  |
| cg06631317 | CCK                                | 5.59E-05    | 0.443079093 |
| cg20631014 | SNAP91;SNAP91                      | 1.50E-05    | 0.443067397 |
| cg10204868 | FAM123C;FAM123C;FAM123C;FAM123C    | 3.34E-05    | 0.443063861 |
| cg25120290 | FLRT2;FLRT2                        | 3.21E-05    | 0.443025791 |
| cg20334313 |                                    | 8.60E-06    | 0.443020449 |
| cg15895690 |                                    | 8.60E-06    | 0.443002228 |



|            |                                       |             |             |
|------------|---------------------------------------|-------------|-------------|
| cg14730445 | SLC5A8                                | 2.58E-05    | 0.442962665 |
| cg15484532 | AJAP1;AJAP1                           | 3.21E-05    | 0.442939949 |
| cg02907374 | CALCB                                 | 0.000357885 | 0.442934264 |
| cg14304469 | VSTM2A;VSTM2A                         | 8.60E-06    | 0.442901764 |
| cg25984344 | DOCK1;FAM196A                         | 3.34E-05    | 0.44289064  |
| cg00565688 | TP73                                  | 9.24E-05    | 0.442866823 |
| cg20519121 | NCRNA00164;MIR663B                    | 1.11E-05    | 0.442852213 |
| cg04236178 | ESRRG                                 | 2.58E-05    | 0.442817764 |
| cg11144753 |                                       | 2.58E-05    | 0.442802948 |
| cg01908462 |                                       | 9.24E-05    | 0.442794066 |
| cg13102079 | CHRM2;CHRM2;CHRM2;CHRM2;CHRM2;CHR     | 8.60E-06    | 0.442778121 |
| cg20895785 | STEAP2;STEAP2                         | 1.11E-05    | 0.442737034 |
| cg13448605 | RSPO1;RSPO1                           | 5.59E-05    | 0.442728364 |
| cg23724641 | LYPD1;LYPD1                           | 1.96E-05    | 0.442726148 |
| cg07690181 | EDIL3                                 | 0.000117986 | 0.442723381 |
| cg06526693 |                                       | 0.000117986 | 0.442710914 |
| cg15054725 |                                       | 5.59E-05    | 0.442702953 |
| cg16729714 | GALNT11                               | 7.23E-05    | 0.442696494 |
| cg23480730 |                                       | 8.60E-06    | 0.442668978 |
| cg16048568 | NR2F2;NR2F2;NR2F2;NR2F2;MIR1469;NR2F2 | 2.58E-05    | 0.442654574 |
| cg02593932 | GALNT13                               | 8.60E-06    | 0.442637836 |
| cg22159514 | ELAVL3;ELAVL3                         | 2.58E-05    | 0.442627741 |
| cg19404444 | SKI                                   | 7.23E-05    | 0.442625757 |
| cg08528626 | ST6GAL2;ST6GAL2;ST6GAL2               | 8.60E-06    | 0.442608202 |
| cg23803337 |                                       | 1.11E-05    | 0.44260452  |
| cg07136325 | PRKD1                                 | 9.24E-05    | 0.442548934 |
| cg27252395 | KAAG1;KAAG1;DCDC2                     | 1.96E-05    | 0.442506502 |
| cg02132714 | HOXB4                                 | 7.23E-05    | 0.442505731 |
| cg17737314 | KDM4A                                 | 7.23E-05    | 0.442460448 |
| cg00698771 |                                       | 0.000187194 | 0.442458992 |
| cg13481638 |                                       | 2.58E-05    | 0.442453515 |
| cg19327614 |                                       | 1.50E-05    | 0.442453122 |
| cg04650654 |                                       | 1.11E-05    | 0.442432636 |
| cg13084458 | INTU                                  | 4.34E-05    | 0.442423735 |
| cg26678920 | PRKCDP                                | 0.000117986 | 0.442416888 |
| cg16865953 |                                       | 5.59E-05    | 0.44231856  |
| cg10890302 | TNXB                                  | 0.000187194 | 0.442308846 |
| cg19647755 |                                       | 4.34E-05    | 0.442278353 |
| cg07695835 | KCNIP4;KCNIP4;KCNIP4;KCNIP4           | 4.34E-05    | 0.442275165 |
| cg20464719 | FCHO1;FCHO1;FCHO1;FCHO1               | 0.00043997  | 0.442274144 |
| cg13816999 | PARVA                                 | 8.60E-06    | 0.442251201 |
| cg24791025 |                                       | 8.60E-06    | 0.442234148 |
| cg02574509 | FMN2;FMN2                             | 5.59E-05    | 0.442198759 |
| cg12147137 | WASF3                                 | 3.34E-05    | 0.442155429 |
| cg01766396 | RFTN2                                 | 7.23E-05    | 0.442154985 |
| cg14784497 | LRRN1;LRRN1                           | 0.000233422 | 0.442080043 |
| cg09915835 | UGT8                                  | 2.58E-05    | 0.442060805 |
| cg03523785 | FOXP1                                 | 8.60E-06    | 0.44205883  |
| cg25756406 |                                       | 8.60E-06    | 0.442041808 |
| cg17093212 | MEOX2                                 | 1.11E-05    | 0.442034344 |
| cg27425996 | COBL                                  | 2.58E-05    | 0.442016061 |
| cg10999312 | NKX2-1;NKX2-1                         | 0.00041966  | 0.441973117 |
| cg05095591 | ZIC1                                  | 8.60E-06    | 0.441928805 |
| cg21322436 | CNTNAP2                               | 4.34E-05    | 0.441915193 |
| cg18129621 | NEFH                                  | 1.96E-05    | 0.441911689 |
| cg02235562 |                                       | 0.000148457 | 0.441879189 |
| cg13221924 | KIAA0753                              | 1.11E-05    | 0.441862638 |
| cg09829319 | GCM2                                  | 1.50E-05    | 0.441826212 |
| cg01692842 | ACAD8                                 | 3.34E-05    | 0.441815516 |
| cg05422029 |                                       | 0.000148457 | 0.441802351 |

|            |                                         |             |             |
|------------|-----------------------------------------|-------------|-------------|
| cg11344566 | CNTNAP5;CNTNAP5                         | 1.50E-05    | 0.441768744 |
| cg25590826 | CCDC33                                  | 2.58E-05    | 0.441752494 |
| cg01257889 | RPH3A;RPH3A                             | 4.34E-05    | 0.441748084 |
| cg24296452 | C19orf41                                | 8.60E-06    | 0.441730454 |
| cg23633856 | PRRX1;PRRX1                             | 3.34E-05    | 0.441714683 |
| cg03300589 | PLCXD3                                  | 2.58E-05    | 0.441679495 |
| cg09820378 | PCDHA2;PCDHA1;PCDHA1;PCDHA6;PCDHA5      | 8.60E-06    | 0.44162096  |
| cg17603689 |                                         | 8.60E-06    | 0.441615057 |
| cg16680438 |                                         | 1.50E-05    | 0.441606723 |
| cg14559356 |                                         | 4.34E-05    | 0.441591823 |
| cg14617810 | CDC14B;CDC14B                           | 1.50E-05    | 0.441591246 |
| cg05478631 | T                                       | 1.96E-05    | 0.441590151 |
| cg24308389 | FEZF1;FEZF1                             | 1.50E-05    | 0.441574334 |
| cg24121424 | MNX1;MNX1;MNX1                          | 8.60E-06    | 0.44157384  |
| cg16542478 |                                         | 4.34E-05    | 0.441570807 |
| cg20107506 |                                         | 4.34E-05    | 0.441559752 |
| cg02152120 | SPAG17;SPAG17                           | 2.58E-05    | 0.44155256  |
| cg02333852 | THRB;THRB;THRB;THRB;THRB;THRB           | 0.000357885 | 0.441528166 |
| cg02220965 | MYST1;MYST1                             | 0.000117986 | 0.441492554 |
| cg10453420 |                                         | 1.96E-05    | 0.441488615 |
| cg24067911 | ATXN1;ATXN1                             | 4.34E-05    | 0.441456434 |
| cg27177554 | C1QL3                                   | 1.50E-05    | 0.441427936 |
| cg18503912 | FXD1;FXD1                               | 1.96E-05    | 0.441420446 |
| cg05783139 | BOLL;BOLL                               | 8.60E-06    | 0.441411883 |
| cg24124029 | C20orf103                               | 0.000233422 | 0.441404333 |
| cg07917901 |                                         | 5.59E-05    | 0.441403503 |
| cg08263589 |                                         | 0.000117986 | 0.441400056 |
| cg08734740 | ISL1;ISL1                               | 1.50E-05    | 0.441386248 |
| cg06776999 | RNF180;RNF180                           | 1.50E-05    | 0.441378057 |
| cg19302722 |                                         | 9.24E-05    | 0.441333505 |
| cg06907391 | GABRA1;GABRA1;GABRA1;GABRA1;GABRA1      | 1.50E-05    | 0.441330849 |
| cg14463412 |                                         | 2.58E-05    | 0.441316499 |
| cg17465305 | OCLN                                    | 1.11E-05    | 0.441285106 |
| cg24789447 | EDNRA;EDNRA;EDNRA                       | 0.000187194 | 0.441276314 |
| cg11157253 |                                         | 8.60E-06    | 0.441266122 |
| cg21057907 | SFTA3                                   | 1.11E-05    | 0.441232603 |
| cg07658508 | SLC26A1                                 | 0.000187194 | 0.441215642 |
| cg11941546 | CLDN7                                   | 0.000117986 | 0.441215637 |
| cg10718056 | TRIM27                                  | 0.000122184 | 0.441211352 |
| cg07577799 | SLC6A1                                  | 3.34E-05    | 0.441203575 |
| cg17370163 | RNF180;RNF180                           | 1.11E-05    | 0.441203228 |
| cg27358097 | GALNTL4                                 | 4.34E-05    | 0.441170966 |
| cg23806894 |                                         | 3.34E-05    | 0.44116917  |
| cg25605731 | CALR                                    | 2.58E-05    | 0.44116016  |
| cg01535733 | RGS17;RGS17                             | 9.24E-05    | 0.441126399 |
| cg03609960 | ANKS1B;ANKS1B;ANKS1B                    | 8.60E-06    | 0.441114835 |
| cg06697536 | HOXD1;HOXD1                             | 5.59E-05    | 0.441095202 |
| cg27112565 | NRXN1;NRXN1;NRXN1;NRXN1                 | 9.24E-05    | 0.441062017 |
| cg20605886 |                                         | 8.60E-06    | 0.441053395 |
| cg09452568 | ESM1;ESM1                               | 7.23E-05    | 0.441028104 |
| cg11176990 | LOC375196;LOC100271715                  | 8.60E-06    | 0.441014211 |
| cg01962937 | HTRA1;HTRA1                             | 0.000148457 | 0.441005193 |
| cg27176138 | HS6ST3                                  | 1.50E-05    | 0.440998394 |
| cg22459755 |                                         | 9.24E-05    | 0.440997586 |
| cg01997272 |                                         | 0.000117986 | 0.440990982 |
| cg04050867 | RSPO2;RSPO2                             | 1.96E-05    | 0.440987303 |
| cg21864259 | ERC2                                    | 1.11E-05    | 0.440967896 |
| cg23606718 | FAM123C;FAM123C;FAM123C;FAM123C;FAM123C | 4.34E-05    | 0.440950737 |
| cg01498609 |                                         | 1.50E-05    | 0.440946339 |
| cg13111733 | HIST3H2BB;HIST3H2A;HIST3H2BB            | 1.11E-05    | 0.440946017 |

|            |                             |             |             |
|------------|-----------------------------|-------------|-------------|
| cg11353250 | COL12A1;COL12A1             | 1.96E-05    | 0.440938035 |
| cg04491367 |                             | 3.34E-05    | 0.440929831 |
| cg06270401 | DYRK4                       | 1.96E-05    | 0.440902109 |
| cg15148933 |                             | 2.58E-05    | 0.440890132 |
| cg24421216 | MEIS1                       | 0.000357885 | 0.440883108 |
| cg01002253 | NPY5R                       | 2.58E-05    | 0.440862805 |
| cg27218767 | TRPC1                       | 0.000654035 | 0.440859831 |
| cg01761758 | TIMP2                       | 4.34E-05    | 0.440848862 |
| cg20866694 |                             | 1.11E-05    | 0.440839231 |
| cg25375340 | MCOLN2                      | 0.000148457 | 0.440828534 |
| cg03881775 | ZIC4;ZIC4;ZIC4;ZIC4;ZIC4    | 1.96E-05    | 0.440822942 |
| cg23367107 |                             | 4.34E-05    | 0.440801985 |
| cg12762763 |                             | 8.60E-06    | 0.440797505 |
| cg19717347 | SLC15A4                     | 1.96E-05    | 0.440795512 |
| cg17918501 | FNDC4                       | 3.34E-05    | 0.440780464 |
| cg26502671 | CLDN3                       | 1.11E-05    | 0.44076835  |
| cg10358981 |                             | 3.34E-05    | 0.440710775 |
| cg02067712 |                             | 1.96E-05    | 0.440696007 |
| cg18347642 | KCNIP4                      | 1.11E-05    | 0.440689069 |
| cg26472133 |                             | 2.58E-05    | 0.440676611 |
| cg04244170 | TOMM70A                     | 0.000148457 | 0.440582576 |
| cg01384488 | NKX6-2                      | 8.60E-06    | 0.440582174 |
| cg17318297 | RGS7BP                      | 1.50E-05    | 0.440575876 |
| cg19697475 | HCN1                        | 3.34E-05    | 0.440559448 |
| cg26783057 | VAX1                        | 3.34E-05    | 0.440533712 |
| cg12196294 | TMCC1;TMCC1                 | 8.60E-06    | 0.440528795 |
| cg00346208 | VWA5B1                      | 0.00043997  | 0.440520662 |
| cg13452258 | EPHA10                      | 7.23E-05    | 0.440518665 |
| cg17189465 | ROBO2                       | 7.23E-05    | 0.440505339 |
| cg27565555 | BMP7                        | 0.000357885 | 0.44049154  |
| cg20463862 | RTN1;RTN1;RTN1;RTN1         | 1.96E-05    | 0.440491443 |
| cg23244559 | CXCL2                       | 0.000357885 | 0.440476131 |
| cg11052780 | TRPA1                       | 9.24E-05    | 0.440431646 |
| cg07934812 | TCERG1L                     | 0.000705485 | 0.440419135 |
| cg09234518 | NEFM;NEFM                   | 5.59E-05    | 0.440408342 |
| cg03354992 |                             | 1.11E-05    | 0.440401555 |
| cg24633978 | HOXD11                      | 8.60E-06    | 0.440401325 |
| cg21038156 | VIPR2                       | 0.000654035 | 0.440389575 |
| cg13796804 | EPHA5;EPHA5                 | 2.58E-05    | 0.440369521 |
| cg00458681 | DGCR10                      | 9.24E-05    | 0.440352772 |
| cg04552418 |                             | 0.000148457 | 0.440343913 |
| cg03503516 | C22orf45;C22orf45;UPB1      | 8.60E-06    | 0.44032957  |
| cg23514016 | BHMT                        | 2.58E-05    | 0.440325994 |
| cg12600174 | HOXA9                       | 1.96E-05    | 0.440324643 |
| cg23509344 |                             | 1.50E-05    | 0.440321081 |
| cg22454660 | GPR177;GPR177               | 0.000148457 | 0.44031281  |
| cg11398452 | VAX1;VAX1                   | 2.58E-05    | 0.440300428 |
| cg08795964 |                             | 1.11E-05    | 0.440267698 |
| cg26146027 | THRB;THRB;THRB              | 0.000117986 | 0.440251478 |
| cg11294835 | CELSR3                      | 1.96E-05    | 0.440244867 |
| cg02155398 |                             | 7.23E-05    | 0.440240377 |
| cg06553312 | MYH14;MYH14;MYH14           | 8.60E-06    | 0.440212793 |
| cg22934295 | CCK;CCK                     | 3.34E-05    | 0.440174196 |
| cg11124364 | TMEM196                     | 8.60E-06    | 0.440156457 |
| cg05924652 | GLP1R                       | 9.24E-05    | 0.440118049 |
| cg12757011 | TBR1                        | 1.11E-05    | 0.440114415 |
| cg05936004 | ATP2C1;ATP2C1;ATP2C1;ATP2C1 | 1.50E-05    | 0.440111581 |
| cg17555373 |                             | 4.34E-05    | 0.440098965 |
| cg12157761 | UACA                        | 1.96E-05    | 0.440090184 |
| cg21632158 |                             | 8.60E-06    | 0.440073579 |

|            |                                    |             |             |
|------------|------------------------------------|-------------|-------------|
| cg21743623 | ATP2C1;ATP2C1;ATP2C1;ATP2C1        | 3.34E-05    | 0.440054319 |
| cg17315500 |                                    | 9.24E-05    | 0.440047126 |
| cg15207742 | RIMS4                              | 8.60E-06    | 0.440033181 |
| cg21114773 | CIDEA;CIDEA                        | 5.59E-05    | 0.440025144 |
| cg00650809 | ANO8                               | 1.96E-05    | 0.440024105 |
| cg02637318 | ADAM32;ADAM32                      | 3.34E-05    | 0.439987625 |
| cg03731974 |                                    | 2.58E-05    | 0.439979282 |
| cg14308313 |                                    | 0.000357885 | 0.439977763 |
| cg08110693 | PXT1                               | 3.34E-05    | 0.439926605 |
| cg18542177 | ARL4A;ARL4A;ARL4A                  | 0.000791389 | 0.439918238 |
| cg09683824 | FAM163A                            | 2.58E-05    | 0.439917539 |
| cg11991058 |                                    | 1.50E-05    | 0.439901705 |
| cg00840310 |                                    | 5.59E-05    | 0.439888836 |
| cg01126567 | GPR139;GPR139                      | 4.34E-05    | 0.439842643 |
| cg12483340 | TMEM87A                            | 3.34E-05    | 0.439838429 |
| cg24255371 | LOC401463                          | 0.001147425 | 0.439837427 |
| cg09515953 | PPP1R14A                           | 0.000187194 | 0.439836612 |
| cg23676588 | GABRA2;GABRA2                      | 8.60E-06    | 0.439808322 |
| cg22670329 | CXCL6                              | 2.58E-05    | 0.439789486 |
| cg10589443 | SCRN1;SCRN1;SCRN1;SCRN1            | 5.59E-05    | 0.439786518 |
| cg12231969 | EN1;EN1                            | 1.11E-05    | 0.439768003 |
| cg05128922 |                                    | 1.11E-05    | 0.439767534 |
| cg05841659 |                                    | 0.000148457 | 0.439724284 |
| cg16832407 | TRPM3                              | 1.11E-05    | 0.439714314 |
| cg09537620 | PAX6;PAX6;PAX6                     | 5.59E-05    | 0.43964819  |
| cg03602280 | FAM38B                             | 7.23E-05    | 0.439632103 |
| cg20609302 |                                    | 9.24E-05    | 0.439622908 |
| cg00247557 | LOC642597;LOC642597                | 8.60E-06    | 0.439621132 |
| cg01434649 | TP73;WDR8                          | 4.34E-05    | 0.439616865 |
| cg19582538 |                                    | 8.60E-06    | 0.439601085 |
| cg02172312 | CDH8                               | 3.34E-05    | 0.439562253 |
| cg18018027 |                                    | 2.58E-05    | 0.439561512 |
| cg01138981 | KIF6                               | 0.000290372 | 0.439555771 |
| cg16378352 | HOOK1                              | 8.60E-06    | 0.439551305 |
| cg05892568 |                                    | 8.60E-06    | 0.439521111 |
| cg14473568 | ROBO2                              | 2.58E-05    | 0.439498719 |
| cg17922359 |                                    | 5.59E-05    | 0.439486661 |
| cg01520867 | MIR203                             | 4.34E-05    | 0.439484294 |
| cg14278853 |                                    | 9.24E-05    | 0.439464039 |
| cg18252039 |                                    | 1.11E-05    | 0.439446106 |
| cg23077820 | PAX3;PAX3;PAX3;PAX3;PAX3;PAX3      | 2.58E-05    | 0.439446075 |
| cg14757228 | PRRT1                              | 2.80E-05    | 0.439426546 |
| cg11931762 |                                    | 7.23E-05    | 0.43939103  |
| cg10036918 | LHFPL3;LHFPL3                      | 3.34E-05    | 0.439377368 |
| cg26385074 | C7orf52                            | 9.24E-05    | 0.439366449 |
| cg18110483 | THBS4                              | 1.96E-05    | 0.43934893  |
| cg11824172 | HOOK1                              | 8.60E-06    | 0.439281802 |
| cg22117805 | PRR5L;PRR5L;PRR5L;PRR5L            | 0.000654035 | 0.43927751  |
| cg13237033 | SIX1                               | 1.50E-05    | 0.439244837 |
| cg02009256 | GLS2                               | 0.000205664 | 0.439240848 |
| cg02860282 |                                    | 7.23E-05    | 0.439231032 |
| cg02742906 |                                    | 3.34E-05    | 0.439230223 |
| cg23658477 |                                    | 0.000187194 | 0.439225258 |
| cg10721149 | SCGN                               | 1.11E-05    | 0.439217184 |
| cg15744359 | LRRC67                             | 0.000148457 | 0.439194491 |
| cg26898932 | CCDC55                             | 2.58E-05    | 0.439155162 |
| cg11985220 |                                    | 3.34E-05    | 0.439135653 |
| cg22994281 | COL4A3;COL4A3;COL4A3;COL4A3;COL4A4 | 1.50E-05    | 0.439132434 |
| cg24243314 | PCDH20                             | 4.34E-05    | 0.439118794 |
| cg24879335 | TF;TF                              | 5.59E-05    | 0.439109422 |

|            |                                     |             |             |
|------------|-------------------------------------|-------------|-------------|
| cg05678749 | GABRG3                              | 1.50E-05    | 0.439105254 |
| cg19161112 | PTF1A                               | 8.60E-06    | 0.43910432  |
| cg14028400 |                                     | 8.60E-06    | 0.439077827 |
| cg18609078 |                                     | 9.24E-05    | 0.439061392 |
| cg15027907 |                                     | 0.00043997  | 0.439050612 |
| cg23619357 |                                     | 1.50E-05    | 0.439026319 |
| cg24399122 | COL9A1;COL9A1;COL9A1                | 1.96E-05    | 0.438993827 |
| cg06458358 | ARHGEF10;ARHGEF10                   | 5.59E-05    | 0.438991436 |
| cg23181580 |                                     | 2.58E-05    | 0.438983238 |
| cg13024709 | ARHGEF4;ARHGEF4                     | 7.23E-05    | 0.438919524 |
| cg11051055 | XKR6                                | 0.000148457 | 0.438863483 |
| cg23538901 |                                     | 1.50E-05    | 0.438841229 |
| cg05068452 | UGT8                                | 1.96E-05    | 0.438829024 |
| cg13526007 | LRFN5                               | 0.000187194 | 0.438799883 |
| cg18438853 | NHLH2;NHLH2                         | 2.58E-05    | 0.438794277 |
| cg19777067 |                                     | 9.24E-05    | 0.438789203 |
| cg06984025 |                                     | 1.11E-05    | 0.438774746 |
| cg03506489 | KCNA4                               | 0.000117986 | 0.438768549 |
| cg18082337 | ZIC4;ZIC4;ZIC4                      | 2.58E-05    | 0.438755511 |
| cg17305181 | CRH;CRH                             | 3.34E-05    | 0.438744369 |
| cg02806156 |                                     | 2.58E-05    | 0.438710629 |
| cg13184872 | PNPLA3;PNPLA3                       | 9.24E-05    | 0.438691922 |
| cg09969277 | LOC254559                           | 1.96E-05    | 0.438684778 |
| cg19651694 | PHOX2A;PHOX2A                       | 1.11E-05    | 0.438684131 |
| cg12002745 |                                     | 3.34E-05    | 0.438678314 |
| cg26163458 |                                     | 1.11E-05    | 0.438649491 |
| cg01486814 |                                     | 8.60E-06    | 0.438647669 |
| cg22746058 | PTF1A                               | 1.50E-05    | 0.438640163 |
| cg10372476 | ACTN2                               | 8.60E-06    | 0.438630113 |
| cg08645720 | LCA5;LCA5                           | 0.000187194 | 0.438603548 |
| cg06482428 | KCNIP4                              | 4.34E-05    | 0.438576853 |
| cg06305891 |                                     | 0.000117986 | 0.438548129 |
| cg18173235 |                                     | 8.60E-06    | 0.438517982 |
| cg08928882 | LOC100192378;ZFX4                   | 5.59E-05    | 0.438508431 |
| cg19908812 | NPY1R                               | 8.60E-06    | 0.438500107 |
| cg20403557 | LVRN                                | 3.34E-05    | 0.438490943 |
| cg07909265 | ITGAV;ITGAV                         | 9.24E-05    | 0.438464541 |
| cg26928972 | CSTA                                | 2.58E-05    | 0.43845357  |
| cg19809039 | C11orf70                            | 8.60E-06    | 0.438444826 |
| cg09804380 | PDPN;PDPN;PDPN;PDPN                 | 2.58E-05    | 0.438421285 |
| cg09231862 | FOXG1                               | 1.96E-05    | 0.43841098  |
| cg17018946 |                                     | 7.23E-05    | 0.438405696 |
| cg11359210 | RGS7BP                              | 3.34E-05    | 0.438387372 |
| cg09686317 | PRKAA2                              | 0.000148457 | 0.438326749 |
| cg23861715 | CDC14B;CDC14B                       | 1.11E-05    | 0.438325024 |
| cg03290530 |                                     | 9.24E-05    | 0.438284914 |
| cg23298047 |                                     | 0.000205664 | 0.43827661  |
| cg23288973 | TRPC7;TRPC7;TRPC7;TRPC7;TRPC7;TRPC7 | 8.60E-06    | 0.438247277 |
| cg22809871 | FGF14                               | 5.59E-05    | 0.438242907 |
| cg23629998 | TMEM229A                            | 1.96E-05    | 0.438211686 |
| cg14276379 | C9orf3                              | 0.000117986 | 0.438207464 |
| cg09683350 |                                     | 1.50E-05    | 0.438185896 |
| cg23378033 | MSRB3;MSRB3                         | 0.000537905 | 0.438184188 |
| cg12409525 | DSCAM                               | 8.60E-06    | 0.438183393 |
| cg02986266 |                                     | 2.58E-05    | 0.438144642 |
| cg18782604 | SIM1                                | 0.000791389 | 0.438106468 |
| cg06833978 | FAM155A                             | 1.11E-05    | 0.438065425 |
| cg09214254 | SMOC2;SMOC2                         | 0.000233422 | 0.438060317 |
| cg10877086 |                                     | 1.11E-05    | 0.438043036 |
| cg02783103 | ZNF365;ZNF365;ZNF365                | 4.34E-05    | 0.438040928 |

|            |                                     |             |             |
|------------|-------------------------------------|-------------|-------------|
| cg05573761 | SGMS2                               | 7.23E-05    | 0.438031201 |
| cg22029189 |                                     | 7.23E-05    | 0.438022944 |
| cg18802021 | MKX                                 | 3.34E-05    | 0.438015245 |
| cg17879189 | PRDM13                              | 8.60E-06    | 0.437980618 |
| cg24693225 |                                     | 3.34E-05    | 0.437940165 |
| cg12028548 | TCF15                               | 8.60E-06    | 0.437928866 |
| cg02856132 |                                     | 8.60E-06    | 0.437927876 |
| cg18805457 | TCERG1;TCERG1                       | 2.58E-05    | 0.437922293 |
| cg14369938 |                                     | 5.59E-05    | 0.437908764 |
| cg14015441 | DPYS                                | 4.34E-05    | 0.437907963 |
| cg16199747 |                                     | 2.58E-05    | 0.437892939 |
| cg12126706 | C1orf92                             | 7.23E-05    | 0.437876086 |
| cg15644174 | TMEM171;TMEM171;TMEM171;TMEM171     | 2.58E-05    | 0.437855068 |
| cg24906819 | PRAGMIN                             | 8.60E-06    | 0.437827912 |
| cg17273911 |                                     | 1.11E-05    | 0.437806704 |
| cg00181834 |                                     | 2.58E-05    | 0.437805768 |
| cg05583020 |                                     | 7.23E-05    | 0.437780686 |
| cg00157668 |                                     | 0.000233422 | 0.437770061 |
| cg16101739 | PRRX1;PRRX1                         | 1.50E-05    | 0.437768676 |
| cg22725685 |                                     | 7.23E-05    | 0.437743221 |
| cg06005892 | OSBPL5;OSBPL5;OSBPL5                | 3.34E-05    | 0.437730018 |
| cg24524352 | ANKRD20B                            | 2.58E-05    | 0.437709177 |
| cg00529958 | ZIC5                                | 3.34E-05    | 0.437700346 |
| cg13555101 | SLC1A1                              | 3.34E-05    | 0.437689297 |
| cg15133301 | SNED1                               | 0.000122184 | 0.437688407 |
| cg26478599 | LOC285954;LOC285954                 | 8.60E-06    | 0.437658855 |
| cg15125684 | NLRP14;ZNF214;NLRP14                | 5.59E-05    | 0.43765203  |
| cg20536983 | DLC1                                | 0.001147425 | 0.437642416 |
| cg24132481 |                                     | 8.60E-06    | 0.437617867 |
| cg25793931 |                                     | 8.60E-06    | 0.437586283 |
| cg14367229 | GSX1                                | 8.60E-06    | 0.437531169 |
| cg17007640 | C14orf23;C14orf23                   | 8.60E-06    | 0.437525376 |
| cg06128198 | DOCK1                               | 0.000290372 | 0.437516411 |
| cg00637687 | PCSK1;PCSK1                         | 5.59E-05    | 0.437493055 |
| cg09297288 | GBX2                                | 1.50E-05    | 0.437484623 |
| cg06522288 | LOC100192378                        | 1.11E-05    | 0.437463675 |
| cg07978472 | TMEM155;LOC100192379                | 3.34E-05    | 0.437457368 |
| cg27472295 | TPBG;TPBG                           | 0.001639597 | 0.437433018 |
| cg08325191 | C10orf93                            | 0.000117986 | 0.437406009 |
| cg04999479 | ID4                                 | 0.000233422 | 0.437385832 |
| cg26399778 | SH3RF2;SH3RF2                       | 2.58E-05    | 0.437367939 |
| cg02914422 | PDE1C                               | 0.000117986 | 0.43736478  |
| cg15488722 | FREM2                               | 8.60E-06    | 0.437351013 |
| cg26277754 |                                     | 8.60E-06    | 0.437350051 |
| cg19867914 | ARHGAP15                            | 9.24E-05    | 0.437345838 |
| cg14689623 | NELL1;NELL1;NELL1;NELL1             | 0.001147425 | 0.437343388 |
| cg23210118 | TMEM20;TMEM20                       | 8.60E-06    | 0.437339432 |
| cg20487710 | PTF1A                               | 1.96E-05    | 0.437338436 |
| cg18117347 | SHANK1                              | 1.11E-05    | 0.437330751 |
| cg16411256 | EPHX2                               | 8.60E-06    | 0.437321008 |
| cg09740671 | ADCY2                               | 9.24E-05    | 0.437316139 |
| cg18422875 | KCNN2                               | 1.96E-05    | 0.437315238 |
| cg04685534 | NELL2;NELL2;NELL2;NELL2;NELL2       | 0.000148457 | 0.437314113 |
| cg09798888 |                                     | 2.58E-05    | 0.437289788 |
| cg10649903 | PCDHA2;PCDHA1;PCDHA3;PCDHA3;PCDHA1  | 2.58E-05    | 0.437279074 |
| cg19275632 | TRPC4;TRPC4;TRPC4;TRPC4;TRPC4;TRPC4 | 0.000148457 | 0.437274829 |
| cg01630690 |                                     | 1.50E-05    | 0.437272219 |
| cg01851450 | RAB32                               | 9.24E-05    | 0.437264843 |
| cg02490516 | FAM150A                             | 1.18E-05    | 0.437258144 |
| cg13488201 | ADAM12;ADAM12                       | 1.96E-05    | 0.437247788 |

|            |                                    |             |             |
|------------|------------------------------------|-------------|-------------|
| cg24312537 | HTRA4;PLEKHA2                      | 0.000117986 | 0.437237426 |
| cg27253807 |                                    | 7.23E-05    | 0.437208932 |
| cg21158087 |                                    | 1.96E-05    | 0.437200558 |
| cg14362758 | LHX3;LHX3                          | 0.000117986 | 0.437151215 |
| cg23081580 | STEAP2;STEAP2;STEAP2               | 7.23E-05    | 0.437144906 |
| cg10408731 | CCT6P1                             | 1.11E-05    | 0.437141744 |
| cg23230584 | PON3                               | 9.24E-05    | 0.437133668 |
| cg04919274 | GPR149                             | 8.60E-06    | 0.437114841 |
| cg22757399 | PNMA2                              | 0.000951187 | 0.437103814 |
| cg25174438 |                                    | 8.60E-06    | 0.437033429 |
| cg19209689 | BRUNOL4;BRUNOL4;BRUNOL4;BRUNOL4    | 4.34E-05    | 0.437027799 |
| cg17384380 |                                    | 2.58E-05    | 0.436936309 |
| cg14396421 |                                    | 2.58E-05    | 0.436931468 |
| cg12892004 | RFX6                               | 8.60E-06    | 0.436852687 |
| cg20869673 | SEMA6D;SEMA6D;SEMA6D;SEMA6D;SEMA6D | 0.000187194 | 0.436833427 |
| cg17087331 | PPAPDC1A                           | 4.34E-05    | 0.436803062 |
| cg17121747 | MFSD7                              | 5.59E-05    | 0.436800168 |
| cg10603275 | CHL1                               | 0.001948248 | 0.436782947 |
| cg11810743 | DACT2                              | 4.34E-05    | 0.436758791 |
| cg01942558 | TNFAIP6                            | 5.59E-05    | 0.436748231 |
| cg13826452 |                                    | 1.96E-05    | 0.436737462 |
| cg14270434 |                                    | 2.58E-05    | 0.436730206 |
| cg03107235 | ATP8A2                             | 0.002304201 | 0.436727444 |
| cg03110368 | ARHGAP20                           | 0.000290372 | 0.436711643 |
| cg21410991 | ISL1                               | 1.50E-05    | 0.436701813 |
| cg00109302 |                                    | 1.50E-05    | 0.436688791 |
| cg25724283 | DCLK1                              | 1.11E-05    | 0.436680602 |
| cg14060111 | ISM1                               | 0.002304201 | 0.436680052 |
| cg06436185 | PRKAG2;PRKAG2                      | 2.58E-05    | 0.436678818 |
| cg11670605 | PLCXD3                             | 1.50E-05    | 0.436672795 |
| cg02770745 | STIM1                              | 2.58E-05    | 0.436626722 |
| cg08444220 | NKX6-2                             | 8.60E-06    | 0.436556548 |
| cg11942956 | EYA4;EYA4;EYA4                     | 9.24E-05    | 0.43655418  |
| cg02709321 | TOX3;TOX3                          | 1.11E-05    | 0.43652597  |
| cg20664238 | NTRK3;NTRK3;NTRK3                  | 2.58E-05    | 0.436523598 |
| cg22674699 | HOXD9                              | 0.000290372 | 0.436520404 |
| cg09077752 |                                    | 3.34E-05    | 0.436485055 |
| cg13849378 | RGS7;RGS7                          | 3.34E-05    | 0.436413093 |
| cg11552072 | NCRNA00164;MIR663B                 | 1.11E-05    | 0.436386591 |
| cg08136772 | PCDH8;PCDH8                        | 1.96E-05    | 0.436369269 |
| cg18689958 | RXFP3                              | 0.000290372 | 0.436347795 |
| cg11817899 | SORCS1;SORCS1                      | 3.34E-05    | 0.436332631 |
| cg02496256 | CDH6;CDH6                          | 0.000117986 | 0.436330403 |
| cg09987596 | FAM123C;FAM123C;FAM123C;FAM123C    | 9.24E-05    | 0.436293639 |
| cg05314350 | TRIM27                             | 1.11E-05    | 0.436293148 |
| cg07016258 | BNC1                               | 4.34E-05    | 0.436290195 |
| cg14206172 | FBXO17                             | 8.60E-06    | 0.436283765 |
| cg10297792 |                                    | 1.11E-05    | 0.436276382 |
| cg12367621 | MORN4;MORN4                        | 7.21E-05    | 0.436243922 |
| cg23328622 | SNAP25;SNAP25                      | 5.59E-05    | 0.436228819 |
| cg13434842 | GATA4                              | 3.34E-05    | 0.43621779  |
| cg00471371 | ZNF516                             | 1.50E-05    | 0.436199728 |
| cg18437792 |                                    | 5.59E-05    | 0.436193844 |
| cg15244049 | GCM2                               | 8.60E-06    | 0.436133045 |
| cg03476195 | ANK2;ANK2;ANK2                     | 4.34E-05    | 0.436099692 |
| cg24804768 | NINJ2                              | 0.000187194 | 0.436088089 |
| cg00907288 | SRGAP3;SRGAP3                      | 0.001948248 | 0.436087207 |
| cg02466321 | ANKRD34B;ANKRD34B                  | 4.34E-05    | 0.436063084 |
| cg17187287 | UGT8                               | 0.000262362 | 0.436061092 |
| cg26785954 | TMEM26                             | 1.96E-05    | 0.436057985 |

|            |                                      |             |             |
|------------|--------------------------------------|-------------|-------------|
| cg26923490 | KCNA7                                | 7.23E-05    | 0.436046867 |
| cg14617041 | TMEM171;TMEM171                      | 0.000955793 | 0.436044752 |
| cg08918749 | LPL                                  | 3.34E-05    | 0.436043293 |
| cg03658236 | STAB2                                | 1.50E-05    | 0.436036053 |
| cg25134515 | WWC2;C4orf38                         | 0.000187194 | 0.436005003 |
| cg20411843 |                                      | 2.58E-05    | 0.435997922 |
| cg12664209 | ISM1                                 | 0.000705485 | 0.435973342 |
| cg22820233 | FCAR;FCAR;FCAR;FCAR;FCAR;FCAR;FCAR;F | 0.000148457 | 0.435965773 |
| cg02606808 | MAP1B                                | 7.23E-05    | 0.435956064 |
| cg04043742 | PLA2G7;PLA2G7;PLA2G7                 | 1.96E-05    | 0.43592881  |
| cg26293546 | PROX1                                | 1.96E-05    | 0.435862746 |
| cg14471364 |                                      | 1.96E-05    | 0.435857853 |
| cg14034197 | GREB1L                               | 8.60E-06    | 0.435832333 |
| cg09571972 | GMDS                                 | 4.34E-05    | 0.435803111 |
| cg02490989 | MTMR7                                | 1.11E-05    | 0.435802495 |
| cg00579520 | TMEM132C                             | 3.34E-05    | 0.435769465 |
| cg01689438 |                                      | 0.000148457 | 0.435755494 |
| cg11611644 |                                      | 2.58E-05    | 0.435721432 |
| cg17275700 | FAM190A                              | 1.50E-05    | 0.435662452 |
| cg11651237 | GABRG3;GABRG3                        | 4.34E-05    | 0.435647279 |
| cg12249728 | SH3BGRL2                             | 1.96E-05    | 0.435618566 |
| cg17252960 | ID4                                  | 0.000233422 | 0.435595548 |
| cg25050951 | TJP1;TJP1                            | 1.50E-05    | 0.435578608 |
| cg02878244 | DBX1                                 | 2.58E-05    | 0.435537646 |
| cg12927990 | GRP;GRP;GRP                          | 0.000236512 | 0.435497542 |
| cg02346970 | PDZD2                                | 9.24E-05    | 0.435474066 |
| cg11153529 | OGDHL;OGDHL;OGDHL                    | 5.59E-05    | 0.435439467 |
| cg14855519 | EBF2                                 | 0.000117986 | 0.435415416 |
| cg06820388 |                                      | 8.60E-06    | 0.435406062 |
| cg09338032 |                                      | 1.96E-05    | 0.435395561 |
| cg20099104 |                                      | 0.000955793 | 0.43538738  |
| cg20673721 | KSR1                                 | 5.59E-05    | 0.435384933 |
| cg05221167 | ZNF560                               | 1.11E-05    | 0.43536884  |
| cg14576062 | DPY19L2P4                            | 8.60E-06    | 0.435357017 |
| cg07333924 | MATN2;MATN2                          | 9.24E-05    | 0.43534631  |
| cg18726691 | RHCG                                 | 3.34E-05    | 0.435341979 |
| cg12594001 |                                      | 8.60E-06    | 0.435340285 |
| cg03120289 | LPPR5;LPPR5                          | 1.11E-05    | 0.435336761 |
| cg20945085 | C2orf65                              | 1.96E-05    | 0.435318921 |
| cg23407655 | ABR;ABR;ABR                          | 0.000148457 | 0.435317019 |
| cg22342329 |                                      | 5.59E-05    | 0.435314062 |
| cg21684012 | SIM1                                 | 3.34E-05    | 0.435293752 |
| cg14423557 | BRUNOL4;BRUNOL4;BRUNOL4;BRUNOL4      | 8.60E-06    | 0.435265368 |
| cg11071231 |                                      | 4.34E-05    | 0.435251231 |
| cg00073780 | PKIB;PKIB;PKIB;PKIB;PKIB             | 0.000148457 | 0.435249358 |
| cg13524919 |                                      | 9.24E-05    | 0.435245294 |
| cg07950000 | GRIK1;GRIK1                          | 1.50E-05    | 0.435226856 |
| cg26150514 |                                      | 3.34E-05    | 0.435213643 |
| cg09877744 | MAPK8IP2;MAPK8IP2                    | 8.60E-06    | 0.43521245  |
| cg06682039 |                                      | 1.96E-05    | 0.435163612 |
| cg22131234 | VSTM2A                               | 9.24E-05    | 0.435146137 |
| cg05700079 | ZIC1                                 | 1.50E-05    | 0.435139826 |
| cg18372607 | PAX6;PAX6;PAX6                       | 4.34E-05    | 0.435136848 |
| cg11293190 | PLK5P                                | 8.60E-06    | 0.435122681 |
| cg26678978 | CCKBR                                | 8.60E-06    | 0.435116963 |
| cg00452257 | SELV                                 | 8.60E-06    | 0.435068935 |
| cg14400498 | FLRT2                                | 1.96E-05    | 0.435037709 |
| cg22694191 | HAPLN4;HAPLN4                        | 1.96E-05    | 0.435035763 |
| cg02044219 | LGI2                                 | 0.000290372 | 0.435026606 |
| cg00902153 | LPP;LPP;LPP                          | 0.000537905 | 0.435014962 |



|            |                       |             |             |
|------------|-----------------------|-------------|-------------|
| cg24345062 | FLJ32063              | 7.23E-05    | 0.434995326 |
| cg22231908 | FAM83H;FAM83H         | 4.34E-05    | 0.43499299  |
| cg00984146 | EGFLAM                | 9.24E-05    | 0.43498473  |
| cg25408950 | NEK7                  | 0.000187194 | 0.434982249 |
| cg16256414 | GULP1                 | 1.96E-05    | 0.434980584 |
| cg12432236 | PCDH17                | 3.34E-05    | 0.43495456  |
| cg16081281 |                       | 1.50E-05    | 0.434943586 |
| cg01376826 | ZIC1                  | 1.11E-05    | 0.434922745 |
| cg14622879 |                       | 5.59E-05    | 0.434815764 |
| cg20011562 | PHACTR1               | 8.60E-06    | 0.434808925 |
| cg22666015 | INPP5D;INPP5D         | 0.000233422 | 0.434808673 |
| cg26434048 | IGFBP3;IGFBP3         | 1.11E-05    | 0.434765209 |
| cg16909783 |                       | 1.11E-05    | 0.434759823 |
| cg04217706 |                       | 1.50E-05    | 0.434750922 |
| cg15034393 |                       | 7.23E-05    | 0.434747333 |
| cg19628148 | CCDC37                | 1.96E-05    | 0.434721516 |
| cg14095438 |                       | 5.59E-05    | 0.434606112 |
| cg09106903 | ESRRG                 | 2.58E-05    | 0.434547266 |
| cg11201710 | FGF12                 | 8.60E-06    | 0.434544902 |
| cg10132208 | ZSCAN1                | 1.50E-05    | 0.434544361 |
| cg23680282 | LRRIQ1;TSPAN19;LRRIQ1 | 0.000148457 | 0.434539066 |
| cg19171596 | STL                   | 0.00043997  | 0.434537228 |
| cg15182360 | PCDH20                | 4.34E-05    | 0.434532211 |
| cg00335124 | PDE4D;PDE4D;PDE4D     | 5.59E-05    | 0.434519617 |
| cg01781617 |                       | 0.000233422 | 0.434489434 |
| cg18375860 | RYR2                  | 1.50E-05    | 0.434453077 |
| cg04940570 | TEAD1                 | 5.11E-05    | 0.434451399 |
| cg08425796 |                       | 3.34E-05    | 0.434445311 |
| cg03333330 | TFPI2                 | 8.60E-06    | 0.434441011 |
| cg23699196 | NTM;NTM;NTM;NTM       | 2.58E-05    | 0.434437539 |
| cg26831566 |                       | 1.11E-05    | 0.434426551 |
| cg25130993 | USH1C;USH1C           | 8.60E-06    | 0.43437004  |
| cg11389756 | TRIM27                | 3.34E-05    | 0.434331643 |
| cg08095196 | GJD2                  | 1.50E-05    | 0.434300981 |
| cg13234643 | CTSL2;CTSL2           | 5.59E-05    | 0.434286021 |
| cg04529066 | ACADL;ACADL           | 3.34E-05    | 0.434272198 |
| cg01777121 | WNT5A                 | 3.34E-05    | 0.434262224 |
| cg23920642 |                       | 2.58E-05    | 0.434254113 |
| cg15020425 | FGF3;FGF3             | 8.60E-06    | 0.43422276  |
| cg08409113 | WNK4                  | 7.23E-05    | 0.434189154 |
| cg01057573 | TNFAIP8               | 3.34E-05    | 0.434166507 |
| cg03112087 | RNF150                | 3.34E-05    | 0.434147204 |
| cg07249459 | FOXC2                 | 7.23E-05    | 0.434129235 |
| cg04154138 | ZNF677                | 0.00043997  | 0.434127898 |
| cg01007828 | CDH8                  | 8.60E-06    | 0.434088186 |
| cg26316023 | CADPS2;CADPS2;CADPS2  | 0.000117986 | 0.43406794  |
| cg07861456 | ADAT1                 | 0.000117986 | 0.434038572 |
| cg10242602 | ZFP42                 | 0.000117986 | 0.434036217 |
| cg11416384 | KIAA1239              | 0.000187194 | 0.434017    |
| cg16640633 | TPBG;TPBG             | 0.001948248 | 0.434003913 |
| cg10680051 | ROBO3                 | 0.000117986 | 0.433943832 |
| cg20264481 |                       | 8.60E-06    | 0.433935648 |
| cg15418499 | IL18                  | 9.24E-05    | 0.43392791  |
| cg16346032 |                       | 3.34E-05    | 0.433912444 |
| cg21609640 | ILDR2                 | 8.60E-06    | 0.433860934 |
| cg15929078 | TAPBP;TAPBP;RGL2;RGL2 | 0.000117986 | 0.433851055 |
| cg04822518 | TMTC1                 | 8.60E-06    | 0.43382696  |
| cg23558842 | CALCB;CALCB           | 0.001147425 | 0.433815686 |
| cg23130097 | MAL2                  | 5.59E-05    | 0.433805255 |
| cg17864046 |                       | 8.60E-06    | 0.433804322 |

|            |                                        |             |             |
|------------|----------------------------------------|-------------|-------------|
| cg10537220 | ZNF365;ZNF365;ZNF365                   | 4.34E-05    | 0.433790874 |
| cg09921610 | UCHL1                                  | 4.34E-05    | 0.433754087 |
| cg17288397 |                                        | 0.000357885 | 0.433728516 |
| cg02873885 |                                        | 4.34E-05    | 0.433724885 |
| cg16934178 | TFPI2                                  | 0.000148457 | 0.433708686 |
| cg10884788 | IGSF9B                                 | 1.50E-05    | 0.433660584 |
| cg13536757 | ZNF804A;ZNF804A                        | 1.50E-05    | 0.433627714 |
| cg04621578 | IGSF9B                                 | 4.34E-05    | 0.43360992  |
| cg14959729 | T                                      | 8.60E-06    | 0.433589315 |
| cg10119075 | ITIH5;ITIH5                            | 0.000233422 | 0.433579309 |
| cg08000065 | UNC5D                                  | 1.96E-05    | 0.433577116 |
| cg09560082 |                                        | 1.96E-05    | 0.433573838 |
| cg10109500 | GHSR;GHSR                              | 4.34E-05    | 0.433557419 |
| cg26867890 | KIF6                                   | 0.000955793 | 0.433528802 |
| cg07116393 | MUL1                                   | 9.24E-05    | 0.433519453 |
| cg23819411 | MCF2L2                                 | 5.59E-05    | 0.433512745 |
| cg09679234 | GABRA2;GABRA2                          | 4.34E-05    | 0.433501196 |
| cg17319007 | FBLN5                                  | 0.000117986 | 0.43349336  |
| cg18378453 |                                        | 0.000233422 | 0.433481181 |
| cg01688536 |                                        | 0.000187194 | 0.433479626 |
| cg15613567 | GPR123;GPR123                          | 2.58E-05    | 0.433417253 |
| cg07847863 | PCDH8;PCDH8                            | 3.34E-05    | 0.433414822 |
| cg08003353 |                                        | 0.002714607 | 0.433412095 |
| cg18328894 | CPLX2                                  | 1.50E-05    | 0.433398814 |
| cg03052078 | STXBP5;STXBP5                          | 0.000148457 | 0.433342608 |
| cg05387146 | ME1                                    | 0.000117986 | 0.433339911 |
| cg25840237 |                                        | 1.50E-05    | 0.433333377 |
| cg00329270 | KY                                     | 7.23E-05    | 0.433326664 |
| cg21574822 |                                        | 3.34E-05    | 0.433277556 |
| cg05025071 | EMR1                                   | 0.000187194 | 0.433233791 |
| cg23676682 | GRIA4;GRIA4;GRIA4;GRIA4                | 4.34E-05    | 0.433215419 |
| cg16758813 |                                        | 8.60E-06    | 0.433208107 |
| cg02681173 | LOC100190940                           | 3.34E-05    | 0.433170068 |
| cg10396546 | ZSWIM2                                 | 3.34E-05    | 0.433141487 |
| cg18538958 | TACR3                                  | 1.50E-05    | 0.433138248 |
| cg10519368 | PCDHA6;PCDHA2;PCDHA1;PCDHA9;PCDHA7     | 0.000187194 | 0.433118205 |
| cg06613392 |                                        | 1.50E-05    | 0.433105782 |
| cg05646686 |                                        | 1.50E-05    | 0.433098267 |
| cg06611922 | VAX1;VAX1                              | 2.58E-05    | 0.433078211 |
| cg08764162 | ZNF438;ZNF438;ZNF438;ZNF438;ZNF438;ZNF | 9.24E-05    | 0.43304183  |
| cg01479396 | SHBG;SAT2                              | 1.96E-05    | 0.433008691 |
| cg16242629 |                                        | 0.000187194 | 0.432988063 |
| cg11375458 |                                        | 3.34E-05    | 0.432956683 |
| cg16703762 | OTP                                    | 1.11E-05    | 0.432940259 |
| cg11148130 | PDZRN3;PDZRN3                          | 8.60E-06    | 0.432932847 |
| cg24704211 | CDC16;CDC16                            | 0.001147425 | 0.432919479 |
| cg16954341 | SCGN                                   | 3.34E-05    | 0.432907927 |
| cg01994307 |                                        | 4.34E-05    | 0.432896889 |
| cg16800165 | FLRT2                                  | 8.60E-06    | 0.432888358 |
| cg14722140 | C6orf141                               | 0.000117986 | 0.432867851 |
| cg15550398 | SNED1                                  | 3.34E-05    | 0.43286686  |
| cg13577744 | STEAP2;STEAP2                          | 4.34E-05    | 0.432836252 |
| cg05593641 |                                        | 3.34E-05    | 0.432827015 |
| cg24755163 |                                        | 8.60E-06    | 0.432821553 |
| cg12210890 | KCNV1                                  | 1.11E-05    | 0.432813359 |
| cg25099490 |                                        | 1.96E-05    | 0.432807557 |
| cg24799921 | C10orf41;C10orf41                      | 1.50E-05    | 0.432783787 |
| cg15585794 | NTM;NTM;NTM;NTM                        | 8.60E-06    | 0.432769395 |
| cg12591668 |                                        | 0.000357885 | 0.432739717 |
| cg27058486 | CHST8;CHST8                            | 4.34E-05    | 0.432721508 |

|            |                                     |             |             |
|------------|-------------------------------------|-------------|-------------|
| cg06584494 | VSTM2A                              | 5.59E-05    | 0.432713496 |
| cg20563910 | MSX2                                | 1.50E-05    | 0.432709373 |
| cg23449696 | ZIC1                                | 1.50E-05    | 0.432706405 |
| cg26163699 | LRRN1                               | 4.34E-05    | 0.432706149 |
| cg05492071 |                                     | 2.58E-05    | 0.432700564 |
| cg19852958 | NKX3-2                              | 0.000290372 | 0.432684506 |
| cg21706229 |                                     | 1.50E-05    | 0.432681029 |
| cg04572930 | FOXK1                               | 0.000526175 | 0.432661185 |
| cg21746997 | BMPR1B                              | 0.004357816 | 0.432638507 |
| cg16304950 | EPB41L3;EPB41L3                     | 9.24E-05    | 0.43259226  |
| cg27472905 | SNED1                               | 9.24E-05    | 0.432581275 |
| cg25798792 | EPHA5;EPHA5                         | 1.11E-05    | 0.432570148 |
| cg02461363 | TMEM26                              | 8.60E-06    | 0.432566137 |
| cg07078841 | CYP1B1;CYP1B1                       | 1.50E-05    | 0.43253454  |
| cg01104724 |                                     | 7.23E-05    | 0.432526237 |
| cg23781495 | PAPPA                               | 0.000117986 | 0.432524624 |
| cg00027083 | EPB41L3                             | 0.000122184 | 0.432522629 |
| cg03859162 | SLC15A1;SLC15A1                     | 3.34E-05    | 0.432517664 |
| cg12162100 | CPNE3                               | 9.24E-05    | 0.43250465  |
| cg27552955 | TRPC1                               | 0.000357885 | 0.432483202 |
| cg06541501 | EBF2                                | 2.58E-05    | 0.432475922 |
| cg02612963 | ZNF483;ZNF483                       | 8.60E-06    | 0.432457    |
| cg12929487 |                                     | 2.58E-05    | 0.432439555 |
| cg11192416 |                                     | 8.60E-06    | 0.43241954  |
| cg16026922 | UCHL1                               | 8.60E-06    | 0.432417652 |
| cg06003656 |                                     | 2.58E-05    | 0.432394112 |
| cg20544852 | TRIM27                              | 1.50E-05    | 0.432372651 |
| cg08998950 | ITPR1;ITPR1;ITPR1                   | 0.000357885 | 0.432340302 |
| cg22488970 | CAMTA1                              | 0.000290372 | 0.432283047 |
| cg05656934 | PRKAA2                              | 0.000117986 | 0.432265343 |
| cg22873539 |                                     | 8.60E-06    | 0.432241737 |
| cg27627524 | ASAP1                               | 7.23E-05    | 0.432225684 |
| cg21117476 | CYP2S1                              | 0.000148457 | 0.432213892 |
| cg00769843 | OTUB1;OTUB1                         | 0.000148457 | 0.432212522 |
| cg02721176 | C10orf96                            | 8.60E-06    | 0.432136418 |
| cg24319902 | SFRP1                               | 1.50E-05    | 0.432110103 |
| cg13755795 | SALL1;SALL1                         | 5.59E-05    | 0.432072779 |
| cg21180286 |                                     | 0.000357885 | 0.432065042 |
| cg05129325 | KCNK2;KCNK2;KCNK2                   | 1.50E-05    | 0.432062491 |
| cg05697849 | ELAVL4;ELAVL4                       | 8.60E-06    | 0.432053987 |
| cg03462380 | GABRA5;GABRA5                       | 2.58E-05    | 0.432013723 |
| cg02499494 | LRIG3;LRIG3;LRIG3                   | 4.34E-05    | 0.432013582 |
| cg20139706 |                                     | 7.23E-05    | 0.431931852 |
| cg10353539 | TTC12                               | 1.50E-05    | 0.431907603 |
| cg08376828 |                                     | 0.005897668 | 0.43190681  |
| cg08627720 |                                     | 3.34E-05    | 0.431898137 |
| cg24301620 | GRIK2;GRIK2;GRIK2;GRIK2;GRIK2;GRIK2 | 1.96E-05    | 0.431873867 |
| cg01990910 | SNX29                               | 0.000262362 | 0.431858799 |
| cg04168670 | CNTNAP5                             | 1.96E-05    | 0.431829199 |
| cg06564232 | TFAP2B                              | 2.58E-05    | 0.431815277 |
| cg22259831 | B4GALNT2;B4GALNT2;B4GALNT2          | 1.96E-05    | 0.431809214 |
| cg11690666 | NARF;NARF;NARF;NARF                 | 2.58E-05    | 0.431781554 |
| cg09833789 | PCDP1                               | 5.59E-05    | 0.431754893 |
| cg14754787 | LHX1                                | 0.000290372 | 0.43175375  |
| cg00332937 |                                     | 0.000117986 | 0.431722172 |
| cg24500832 | HOXC9                               | 5.59E-05    | 0.431714439 |
| cg21938436 | ADAMTS9                             | 1.50E-05    | 0.431712453 |
| cg08097281 |                                     | 0.000654035 | 0.431699153 |
| cg26055770 | PDZRN3;PDZRN3                       | 8.60E-06    | 0.431695409 |
| cg03711485 | NKX2-3                              | 0.000187194 | 0.431685966 |

|            |                                    |             |             |
|------------|------------------------------------|-------------|-------------|
| cg15653173 | SOX1                               | 0.00043997  | 0.431657658 |
| cg19866866 | ZNF648                             | 5.59E-05    | 0.431633034 |
| cg17371081 | NELL1;NELL1                        | 0.000187194 | 0.431574241 |
| cg08470742 | THBS2                              | 2.58E-05    | 0.431571747 |
| cg24759795 | CSMD3;CSMD3                        | 1.11E-05    | 0.431541241 |
| cg23474501 | GPR123                             | 4.34E-05    | 0.431536943 |
| cg02446647 | EYA4;EYA4;EYA4                     | 0.001639597 | 0.431517574 |
| cg27282264 | A2BP1;A2BP1;A2BP1                  | 8.60E-06    | 0.431475662 |
| cg18181607 |                                    | 8.60E-06    | 0.43140324  |
| cg10906284 | AVPR1A                             | 8.60E-06    | 0.431393509 |
| cg14614314 | CALY;CALY                          | 0.001147425 | 0.43138739  |
| cg02506984 | RHEB                               | 2.58E-05    | 0.43136252  |
| cg07060551 | SHANK1                             | 4.34E-05    | 0.431361843 |
| cg16316649 | ACADL                              | 1.96E-05    | 0.431360975 |
| cg23949389 |                                    | 8.60E-06    | 0.431337912 |
| cg04996277 | KCNN2                              | 1.11E-05    | 0.431287945 |
| cg01146232 | SALL1;SALL1                        | 0.000187194 | 0.431283335 |
| cg18404308 | CNGA3;CNGA3;CNGA3;CNGA3            | 2.58E-05    | 0.431275548 |
| cg13586599 | SCGN                               | 8.60E-06    | 0.431272795 |
| cg12591770 |                                    | 8.60E-06    | 0.431269455 |
| cg24565369 | KCND2                              | 0.000290372 | 0.431269137 |
| cg24719005 | EFEMP1;EFEMP1;EFEMP1               | 1.50E-05    | 0.431259604 |
| cg00755448 | KCNB2                              | 4.34E-05    | 0.431236245 |
| cg06261937 | DCC;DCC                            | 2.58E-05    | 0.431198786 |
| cg04797725 |                                    | 4.34E-05    | 0.431185356 |
| cg18533282 | SPATA18;SPATA18                    | 2.58E-05    | 0.431178076 |
| cg08475953 | COL23A1                            | 0.000233422 | 0.431151869 |
| cg21250356 |                                    | 4.34E-05    | 0.431137115 |
| cg10437245 | VAX1;VAX1                          | 1.96E-05    | 0.43113423  |
| cg17087479 |                                    | 5.59E-05    | 0.431121182 |
| cg16705627 | SOX1;SOX1                          | 4.34E-05    | 0.431103192 |
| cg24784794 | ROBO1;ROBO1;ROBO1;ROBO1            | 3.34E-05    | 0.431077135 |
| cg05373457 | KCNS2                              | 1.96E-05    | 0.431047497 |
| cg23080354 | PHF21B;PHF21B                      | 0.000117986 | 0.431046049 |
| cg11497372 |                                    | 2.58E-05    | 0.431039094 |
| cg03257575 |                                    | 3.34E-05    | 0.431000272 |
| cg06613095 | SOX14;SOX14                        | 0.000187194 | 0.430995834 |
| cg22454769 | FHL2;FHL2;FHL2;FHL2                | 1.96E-05    | 0.430989597 |
| cg23984434 | GUCY1A2                            | 1.50E-05    | 0.430982915 |
| cg21430539 | MOGAT1                             | 2.08E-05    | 0.430946101 |
| cg24189721 |                                    | 1.50E-05    | 0.430936299 |
| cg22888418 | LRAT                               | 8.60E-06    | 0.430909838 |
| cg03091551 | OTX2                               | 8.60E-06    | 0.430899322 |
| cg05767421 | MAL2                               | 8.60E-06    | 0.430854835 |
| cg08476595 | LOC169834                          | 8.60E-06    | 0.430835495 |
| cg15593298 | PAQR9                              | 9.24E-05    | 0.430830798 |
| cg11041835 | GULP1                              | 1.96E-05    | 0.430812449 |
| cg15071611 | C11orf70                           | 0.000117986 | 0.430765347 |
| cg14632696 | PDLIM3;PDLIM3                      | 0.000148457 | 0.430757959 |
| cg05009601 | FEZF1;FEZF1;FEZF1;FEZF1            | 8.60E-06    | 0.43070561  |
| cg21672843 | PTPRT;PTPRT                        | 0.000148457 | 0.43070042  |
| cg19707040 | CTNNA2;CTNNA2;CTNNA2;CTNNA2        | 3.34E-05    | 0.430684703 |
| cg15808426 |                                    | 1.50E-05    | 0.43067287  |
| cg27095222 |                                    | 0.000537905 | 0.430670087 |
| cg23953697 | PCDHA7;PCDHA12;PCDHA6;PCDHAC1;PCDH | 2.58E-05    | 0.430658518 |
| cg01088070 | B3GAT2                             | 1.96E-05    | 0.43062536  |
| cg04768697 | CCDC105                            | 8.60E-06    | 0.430610151 |
| cg25451082 | ARSJ                               | 0.000357885 | 0.430608081 |
| cg17514558 | PCDHB19P                           | 5.59E-05    | 0.430591284 |
| cg17741501 |                                    | 7.23E-05    | 0.430584771 |

|            |                                     |             |             |
|------------|-------------------------------------|-------------|-------------|
| cg02696327 | CBLN1                               | 7.23E-05    | 0.430576982 |
| cg16416793 | YAP1;YAP1                           | 0.005897668 | 0.430575763 |
| cg07139509 | C14orf162                           | 0.000148457 | 0.430563593 |
| cg23729107 | FBXO39                              | 0.000117986 | 0.430516841 |
| cg18516557 |                                     | 5.59E-05    | 0.430507914 |
| cg26139133 | THRB;THRB;THRB                      | 0.000233422 | 0.430503919 |
| cg13438337 | PCSK5                               | 2.58E-05    | 0.430483163 |
| cg06554535 | PARVA                               | 8.60E-06    | 0.430460791 |
| cg08602008 |                                     | 0.000148457 | 0.430446446 |
| cg01065349 |                                     | 1.11E-05    | 0.430437257 |
| cg26364899 | PPARG;PPARG;PPARG                   | 1.96E-05    | 0.430400692 |
| cg23861668 | NELL1;NELL1;NELL1;NELL1             | 0.000537905 | 0.430398859 |
| cg10611016 | C11orf42                            | 1.96E-05    | 0.430375092 |
| cg11461298 | UNCX                                | 8.60E-06    | 0.430336838 |
| cg22763718 | PCDH8;PCDH8                         | 4.34E-05    | 0.430317399 |
| cg09437327 | LOC100128811;GPR158                 | 1.50E-05    | 0.430312585 |
| cg19989043 | CD2AP                               | 4.34E-05    | 0.430305337 |
| cg24125828 | PRRT1                               | 1.50E-05    | 0.430300476 |
| cg22865798 | NRG1;NRG1;NRG1;NRG1;NRG1;NRG1;NRG1; | 0.000117986 | 0.430276151 |
| cg19739596 | MS4A3;MS4A3;MS4A3;MS4A3;MS4A3;MS4A3 | 1.96E-05    | 0.430268375 |
| cg15312943 | SERGEF                              | 4.34E-05    | 0.430265596 |
| cg23409774 | CPLX2;CPLX2                         | 1.50E-05    | 0.430251143 |
| cg13839457 |                                     | 0.000233422 | 0.430236776 |
| cg26049998 | PITPNC1;PITPNC1                     | 0.003189589 | 0.430206612 |
| cg18502142 | DLX6AS                              | 0.000187194 | 0.430180552 |
| cg21088983 | CLVS1                               | 1.50E-05    | 0.43015469  |
| cg09976984 |                                     | 1.11E-05    | 0.430145914 |
| cg14823851 | TBX4                                | 8.60E-06    | 0.430144849 |
| cg19478298 | RELN;RELN                           | 1.96E-05    | 0.430133727 |
| cg12078605 | CTNNA2;LRRTM1;CTNNA2                | 1.96E-05    | 0.430122697 |
| cg03129384 | FAM196A;DOCK1                       | 7.23E-05    | 0.430102443 |
| cg26980244 | NEFM;NEFM;NEFM                      | 0.000187194 | 0.430093759 |
| cg12300724 |                                     | 2.58E-05    | 0.430079658 |
| cg09868598 |                                     | 1.50E-05    | 0.430066056 |
| cg07365127 |                                     | 5.59E-05    | 0.430064729 |
| cg08184159 | TBX5;TBX5;TBX5;TBX5                 | 1.11E-05    | 0.430058444 |
| cg06755438 | CCDC108                             | 1.50E-05    | 0.430045123 |
| cg21338532 | RPRM                                | 0.000117986 | 0.430033415 |
| cg04847920 | TMEM98;TMEM98                       | 8.60E-06    | 0.430028334 |
| cg19937938 | RSPO4;RSPO4                         | 1.96E-05    | 0.430002739 |
| cg18790597 | FAM184B                             | 0.000117986 | 0.429973916 |
| cg23062112 | ANO3                                | 8.60E-06    | 0.429969833 |
| cg22732749 | PCDHB15                             | 2.58E-05    | 0.429956749 |
| cg27200257 | P4HB                                | 1.96E-05    | 0.429932543 |
| cg19712603 | PCDH8;PCDH8                         | 0.000122184 | 0.429929351 |
| cg16727923 | SLITRK1                             | 0.000290372 | 0.42988158  |
| cg26781575 | FAM171B                             | 8.60E-06    | 0.429879173 |
| cg12800244 | SGEF                                | 1.96E-05    | 0.42984864  |
| cg18940047 | DPP6;DPP6                           | 1.50E-05    | 0.429794739 |
| cg06678279 | ERC2;ERC2                           | 9.24E-05    | 0.429741019 |
| cg13962186 | FOXB2                               | 3.34E-05    | 0.429723805 |
| cg22399790 |                                     | 8.60E-06    | 0.429710905 |
| cg01119452 | ELMO1                               | 0.000148457 | 0.429701992 |
| cg00295572 | TP73                                | 0.000233422 | 0.429695293 |
| cg03024372 | FAM83B                              | 0.000233422 | 0.429662062 |
| cg20509869 |                                     | 0.000537905 | 0.429654638 |
| cg00476955 | TRPC2                               | 7.23E-05    | 0.429646496 |
| cg16971589 | RHOBTB1;RHOBTB1                     | 0.000187194 | 0.429645407 |
| cg13670601 | SLC6A15;SLC6A15;SLC6A15             | 3.34E-05    | 0.42964473  |
| cg04450459 |                                     | 8.60E-06    | 0.429643632 |

|            |                                    |             |             |
|------------|------------------------------------|-------------|-------------|
| cg04005707 | CWH43;CWH43                        | 1.11E-05    | 0.429608394 |
| cg00439981 | FAM120B                            | 0.000148457 | 0.429537786 |
| cg14146740 |                                    | 0.000148457 | 0.429536934 |
| cg27656786 | GPR126;GPR126;GPR126;GPR126        | 8.60E-06    | 0.429478732 |
| cg06874656 | NTM;NTM;NTM;NTM                    | 4.34E-05    | 0.4294748   |
| cg18877506 | PDPN;PDPN;PDPN;PDPN                | 2.58E-05    | 0.429473709 |
| cg08545287 | A2BP1;A2BP1                        | 3.34E-05    | 0.429469312 |
| cg18759209 | BMP7                               | 0.000117986 | 0.429462349 |
| cg25553799 | SHISA2                             | 8.60E-06    | 0.429458535 |
| cg16404865 | KCNC1;KCNC1                        | 1.11E-05    | 0.429436401 |
| cg14627348 |                                    | 0.000148457 | 0.429433921 |
| cg03405909 |                                    | 5.11E-05    | 0.429414205 |
| cg14294758 | LSAMP                              | 1.96E-05    | 0.429406513 |
| cg24685134 | TTC22;TTC22                        | 0.000334462 | 0.429398352 |
| cg06769296 | LOC100128239                       | 1.50E-05    | 0.429373994 |
| cg09118258 | LMX1A                              | 1.18E-05    | 0.429373649 |
| cg07224726 | LVRN                               | 3.34E-05    | 0.429362948 |
| cg10989763 | NXPH2                              | 8.60E-06    | 0.42935891  |
| cg01435766 | SLC5A11                            | 3.21E-05    | 0.429351066 |
| cg13176012 |                                    | 2.58E-05    | 0.429348464 |
| cg13021619 | NKX2-6                             | 1.11E-05    | 0.429339209 |
| cg00510598 | IRX6                               | 4.34E-05    | 0.429285149 |
| cg03307911 | CYP24A1;CYP24A1                    | 3.34E-05    | 0.429280248 |
| cg02062409 |                                    | 7.23E-05    | 0.429275904 |
| cg25930786 | TARM1                              | 4.34E-05    | 0.42927508  |
| cg01474011 | CUL3                               | 4.34E-05    | 0.429273671 |
| cg22583065 | FGF14                              | 0.000148457 | 0.429246821 |
| cg03558805 | CLDN3                              | 1.50E-05    | 0.429238074 |
| cg18878616 | PCDHGA1;PCDHGA2;PCDHGA2            | 8.60E-06    | 0.429226574 |
| cg17291435 | FHL2;FHL2;FHL2;FHL2;FHL2;FHL2;FHL2 | 0.000570759 | 0.429209561 |
| cg19937061 |                                    | 5.59E-05    | 0.429196029 |
| cg00862117 | IQSEC3                             | 8.60E-06    | 0.429183265 |
| cg21127597 | MPZL3                              | 9.24E-05    | 0.429182324 |
| cg13908315 |                                    | 0.000187194 | 0.429181254 |
| cg11342198 |                                    | 0.000537905 | 0.42916393  |
| cg17299437 |                                    | 0.000187194 | 0.429146475 |
| cg24596998 | C1orf115                           | 0.00043997  | 0.429140165 |
| cg12243375 | GUCY1A2                            | 0.000117986 | 0.429094557 |
| cg17670477 |                                    | 5.59E-05    | 0.429090077 |
| cg22541254 | GRIK2;GRIK2;GRIK2                  | 1.11E-05    | 0.42903733  |
| cg18761549 |                                    | 1.11E-05    | 0.429035421 |
| cg05625362 | TLL1                               | 1.50E-05    | 0.429028108 |
| cg12792250 |                                    | 1.11E-05    | 0.429010577 |
| cg00186909 | PLEKHG7                            | 0.000537905 | 0.428985428 |
| cg17629929 |                                    | 0.000537905 | 0.428983903 |
| cg26333822 | SLC5A7;SLC5A7                      | 1.11E-05    | 0.428982163 |
| cg17453778 | CASR;CASR                          | 2.58E-05    | 0.42897725  |
| cg03689552 | MEFV                               | 9.24E-05    | 0.428968689 |
| cg27590049 | LMX1A                              | 1.96E-05    | 0.428967688 |
| cg17875483 |                                    | 0.000233422 | 0.428950885 |
| cg25908985 | IHH                                | 0.000357885 | 0.428941648 |
| cg07955752 | VSTM2B                             | 8.60E-06    | 0.428934537 |
| cg03585912 |                                    | 8.60E-06    | 0.428927986 |
| cg13238990 | NLGN1                              | 1.11E-05    | 0.428915075 |
| cg23760687 |                                    | 9.24E-05    | 0.428894381 |
| cg08949339 |                                    | 1.50E-05    | 0.428892302 |
| cg22657780 | ZNF385B;MIR1258;ZNF385B            | 0.000357885 | 0.428870531 |
| cg20060206 | LMO3;LMO3                          | 8.60E-06    | 0.428862762 |
| cg05627557 |                                    | 4.34E-05    | 0.428819709 |
| cg13533151 | CHST9                              | 8.60E-06    | 0.428804996 |

|            |                     |             |             |
|------------|---------------------|-------------|-------------|
| cg21282549 |                     | 9.24E-05    | 0.428776362 |
| cg13519184 |                     | 9.24E-05    | 0.428738961 |
| cg21753226 | KCNQ1DN             | 1.11E-05    | 0.42871872  |
| cg00630212 | CXCL2               | 0.000290372 | 0.428695085 |
| cg11873482 | TAC1;TAC1;TAC1;TAC1 | 4.34E-05    | 0.428669191 |
| cg22079008 |                     | 8.60E-06    | 0.428666318 |
| cg12127472 | C17orf104           | 7.23E-05    | 0.428645856 |
| cg18729001 | DBX2                | 2.58E-05    | 0.428637672 |
| cg06881965 | DCAF5               | 7.23E-05    | 0.428617639 |
| cg14055896 | CACNG8              | 8.60E-06    | 0.428615955 |
| cg06425919 | MYOD1               | 1.11E-05    | 0.428592295 |
| cg11051843 | SEMA3C              | 0.000148457 | 0.428557312 |
| cg04508964 | RFX4                | 8.60E-06    | 0.428550829 |
| cg15235987 | EP400               | 3.34E-05    | 0.428537176 |
| cg17167852 | PCSK9               | 1.96E-05    | 0.428498778 |
| cg26723355 | PDE10A;PDE10A       | 0.000290372 | 0.428452305 |
| cg17619823 | ADRB3               | 1.11E-05    | 0.428444698 |
| cg25137403 |                     | 8.60E-06    | 0.428442553 |
| cg11581706 | CACNA2D1            | 7.23E-05    | 0.428370538 |
| cg20092531 |                     | 4.34E-05    | 0.428367529 |
| cg12172441 |                     | 7.23E-05    | 0.428337848 |
| cg13331559 | MCOLN3              | 8.60E-06    | 0.428334767 |
| cg21762788 |                     | 0.000187194 | 0.428322349 |
| cg21173447 | DSCAM;DSCAM         | 7.23E-05    | 0.428321481 |
| cg01614020 | NEFL                | 0.000290372 | 0.428273277 |
| cg16909109 | KIF6                | 0.001376172 | 0.428268679 |
| cg20168230 | GRIK3               | 2.58E-05    | 0.42826139  |
| cg23519626 | P4HA3               | 5.59E-05    | 0.428252622 |
| cg16990168 | TBX15               | 9.24E-05    | 0.428237815 |
| cg25307881 | MUL1                | 0.000233422 | 0.428230681 |
| cg04523524 | NMU                 | 4.34E-05    | 0.428215578 |
| cg09062550 | INSM1;INSM1         | 9.24E-05    | 0.428194718 |
| cg21474897 | CLDN11              | 8.60E-06    | 0.428193106 |
| cg17194154 |                     | 5.59E-05    | 0.428187419 |
| cg03863591 |                     | 8.60E-06    | 0.42818354  |
| cg02048505 | C7orf57             | 1.50E-05    | 0.428159592 |
| cg06373940 | ERCC3               | 7.23E-05    | 0.428152267 |
| cg08979895 | PITX2;PITX2;PITX2   | 8.60E-06    | 0.428149233 |
| cg07006091 |                     | 7.23E-05    | 0.428143741 |
| cg18803104 |                     | 0.000791389 | 0.428134374 |
| cg02774855 | CLIP4               | 0.000187194 | 0.428131507 |
| cg12160258 | TMEM26              | 8.60E-06    | 0.428113033 |
| cg27180153 |                     | 1.50E-05    | 0.428097858 |
| cg02963248 |                     | 0.000233422 | 0.428087576 |
| cg01432561 | NEFL                | 1.11E-05    | 0.428074655 |
| cg25135018 | IL6R;IL6R           | 0.005897668 | 0.428037222 |
| cg09023820 | MATN2;MATN2         | 3.34E-05    | 0.42803427  |
| cg20598560 | SGPP2               | 4.34E-05    | 0.428032347 |
| cg05171937 | STK38L              | 7.23E-05    | 0.428015266 |
| cg23815582 | SLC30A10;SLC30A10   | 9.24E-05    | 0.428011748 |
| cg17991436 | RFX6                | 3.34E-05    | 0.428011421 |
| cg27319917 | N4BP1               | 4.34E-05    | 0.427991049 |
| cg20086208 | GPR139              | 5.59E-05    | 0.427944863 |
| cg07427438 |                     | 1.50E-05    | 0.427886318 |
| cg05735180 |                     | 9.24E-05    | 0.427861289 |
| cg07749412 | C3P1                | 0.000117986 | 0.427843175 |
| cg26930596 | PRKCZ;PRKCZ;PRKCZ   | 7.23E-05    | 0.427834238 |
| cg27612364 | SLC25A27;CYP39A1    | 9.24E-05    | 0.427831423 |
| cg01388649 |                     | 5.59E-05    | 0.427829056 |
| cg16023545 | GBX2                | 1.50E-05    | 0.427814867 |

|            |                                           |             |             |
|------------|-------------------------------------------|-------------|-------------|
| cg26960562 | DNAH9                                     | 1.11E-05    | 0.427809997 |
| cg12114834 | BSX                                       | 5.59E-05    | 0.427804893 |
| cg26517714 | TLX3                                      | 1.96E-05    | 0.427791569 |
| cg15543551 | FGF12                                     | 1.96E-05    | 0.427784537 |
| cg14419046 |                                           | 0.000148457 | 0.427771382 |
| cg25889711 |                                           | 1.50E-05    | 0.427732868 |
| cg25784308 | FAM123C;FAM123C;FAM123C;FAM123C;FAM123C   | 1.50E-05    | 0.427715917 |
| cg26669044 | RALYL;RALYL;RALYL;RALYL;RALYL;RALYL;RALYL | 3.34E-05    | 0.427710395 |
| cg24935332 |                                           | 2.58E-05    | 0.427701387 |
| cg16419066 | MGC2889;HRASLS                            | 3.21E-05    | 0.427697702 |
| cg09112514 | PDGFRA                                    | 1.96E-05    | 0.427689184 |
| cg07649491 | FAM190A                                   | 1.50E-05    | 0.427651986 |
| cg17508941 |                                           | 8.60E-06    | 0.427642668 |
| cg19358493 | EMX2;EMX2OS;EMX2                          | 1.11E-05    | 0.427633474 |
| cg25285904 |                                           | 8.60E-06    | 0.427628829 |
| cg10447327 | LANCL1;LANCL1;LANCL1                      | 0.000148457 | 0.427617166 |
| cg10752508 | CPOX                                      | 7.23E-05    | 0.427608784 |
| cg17007896 |                                           | 9.24E-05    | 0.427592701 |
| cg16701939 | KCND3;KCND3                               | 1.96E-05    | 0.427582001 |
| cg16849041 | DOCK5;DOCK5                               | 0.000537905 | 0.427579469 |
| cg12989574 | GPC6;GPC6                                 | 3.34E-05    | 0.427557372 |
| cg10603004 | NKX2-6                                    | 8.60E-06    | 0.427553733 |
| cg07473471 | ESRP1;ESRP1;ESRP1;ESRP1;ESRP1             | 0.000955793 | 0.427542963 |
| cg04121771 | TM4SF4                                    | 3.34E-05    | 0.427523191 |
| cg23215729 | RIPPLY2                                   | 3.34E-05    | 0.42751077  |
| cg06294712 | BHLHE22                                   | 4.34E-05    | 0.427472195 |
| cg19636519 |                                           | 8.60E-06    | 0.427470834 |
| cg01763916 | SMAP2                                     | 0.000148457 | 0.427441251 |
| cg24740868 | C1orf87;C1orf87                           | 1.11E-05    | 0.427441158 |
| cg21578219 | IGSF21;IGSF21                             | 5.59E-05    | 0.427436901 |
| cg02824386 |                                           | 3.34E-05    | 0.427433103 |
| cg08675717 | PHACTR3                                   | 0.000233422 | 0.427431715 |
| cg12423584 | SCIN                                      | 1.11E-05    | 0.42741428  |
| cg11781306 | PCDHA2;PCDHA1;PCDHA1;PCDHA3;PCDHA4        | 4.34E-05    | 0.427388082 |
| cg14886059 | ZSCAN1                                    | 1.50E-05    | 0.427378069 |
| cg08413157 | PTPRT;PTPRT                               | 0.000117986 | 0.427373272 |
| cg27493301 | PRICKLE1                                  | 0.000357885 | 0.427372059 |
| cg12563372 |                                           | 8.60E-06    | 0.427343496 |
| cg22861116 | PCDHGA4;PCDHGA7;PCDHGA6;PCDHGA1;PCDHGA2   | 0.000148457 | 0.427316781 |
| cg10137084 | CACNA2D3                                  | 0.000117986 | 0.427315442 |
| cg12472483 | PTPRN2;PTPRN2;PTPRN2                      | 8.60E-06    | 0.427307737 |
| cg07493197 |                                           | 0.000365373 | 0.42729823  |
| cg26664161 | FBXL21                                    | 4.34E-05    | 0.427282949 |
| cg10976975 | BMP10;BMP10                               | 2.58E-05    | 0.427234778 |
| cg09488203 | GPR120                                    | 3.92E-05    | 0.427220776 |
| cg21473142 | EOMES                                     | 0.000955793 | 0.427216453 |
| cg17019292 | MARVELD2;MARVELD2                         | 8.60E-06    | 0.427210305 |
| cg04306063 | CRHBP                                     | 4.34E-05    | 0.427208116 |
| cg08491188 | PCDHGA4;PCDHGA6;PCDHGA1;PCDHGA8;PCDHGA2   | 1.96E-05    | 0.427200416 |
| cg06998965 | MARVELD2;MARVELD2                         | 8.60E-06    | 0.427184824 |
| cg02318926 | BNC1                                      | 5.59E-05    | 0.427171379 |
| cg07149296 | KIAA1755                                  | 1.96E-05    | 0.427166648 |
| cg10652091 | SNED1                                     | 9.24E-05    | 0.427166187 |
| cg05754435 | KDR                                       | 9.24E-05    | 0.427129406 |
| cg07779444 | GPR123                                    | 8.60E-06    | 0.427120706 |
| cg08312626 |                                           | 2.80E-05    | 0.427117616 |
| cg12505170 |                                           | 0.000117986 | 0.427110086 |
| cg18026227 | LOC100192378;ZFHX4                        | 0.000117986 | 0.427097721 |
| cg01038450 | MATN2;MATN2                               | 7.23E-05    | 0.427070263 |
| cg18104012 | FEZF2                                     | 0.001639597 | 0.427045531 |



|            |                                 |             |             |
|------------|---------------------------------|-------------|-------------|
| cg05663573 | SLC7A14                         | 4.34E-05    | 0.427026952 |
| cg18556676 |                                 | 1.96E-05    | 0.426972093 |
| cg24728018 | CLVS2;CLVS2                     | 2.58E-05    | 0.42695984  |
| cg11238048 | DACT2                           | 5.59E-05    | 0.426920749 |
| cg18635723 | DPYSL3                          | 1.96E-05    | 0.426911952 |
| cg21113740 | ELTD1;ELTD1                     | 4.34E-05    | 0.426908271 |
| cg00522056 | RPRM                            | 0.000187194 | 0.426906346 |
| cg14664759 | KCNT2                           | 8.60E-06    | 0.426898874 |
| cg12258785 | THRB;THRB;THRB                  | 0.000117986 | 0.426898047 |
| cg07442479 | GDNF;GDNF                       | 1.11E-05    | 0.426873087 |
| cg05375487 | GALNT11                         | 4.34E-05    | 0.426861492 |
| cg20019985 |                                 | 9.24E-05    | 0.426857248 |
| cg04599026 | DLX6AS;DLX6                     | 0.000791389 | 0.426849603 |
| cg02160684 | TRIB1                           | 0.000148457 | 0.42682574  |
| cg07850604 | INSM2;INSM2                     | 1.96E-05    | 0.426816479 |
| cg10443195 |                                 | 0.001376172 | 0.426755056 |
| cg26163578 |                                 | 3.34E-05    | 0.426722076 |
| cg15381304 | GPR6                            | 8.60E-06    | 0.426719246 |
| cg06103031 | BRUNOL4;BRUNOL4;BRUNOL4;BRUNOL4 | 9.24E-05    | 0.42671359  |
| cg26758986 | P4HA3                           | 0.000110797 | 0.426691079 |
| cg14788242 | SEC61A1                         | 8.60E-06    | 0.426685325 |
| cg23087992 | SOX2OT;SOX2                     | 0.000187194 | 0.426682256 |
| cg07654569 | FAM164A                         | 8.60E-06    | 0.426677228 |
| cg16921310 | ASCL1;ASCL1                     | 0.000290372 | 0.426670378 |
| cg12918457 |                                 | 9.24E-05    | 0.426668863 |
| cg16419354 | FAM163A                         | 8.60E-06    | 0.426664888 |
| cg09168808 |                                 | 8.60E-06    | 0.426664318 |
| cg04823455 | ARSJ;ARSJ                       | 1.50E-05    | 0.426657396 |
| cg00167654 | WSCD1                           | 0.000791389 | 0.426653481 |
| cg26892444 | FAM159B                         | 1.50E-05    | 0.426619163 |
| cg14353137 |                                 | 1.96E-05    | 0.426610812 |
| cg07121856 | PON3                            | 5.59E-05    | 0.42659886  |
| cg20230721 | TFPI2                           | 9.24E-05    | 0.426597512 |
| cg13348059 |                                 | 0.000187194 | 0.426593508 |
| cg23770904 | GATA5                           | 9.24E-05    | 0.426587608 |
| cg24229589 | CILP2                           | 8.60E-06    | 0.426579293 |
| cg16068263 |                                 | 2.58E-05    | 0.42656132  |
| cg23336892 |                                 | 3.34E-05    | 0.426559019 |
| cg17453460 |                                 | 9.24E-05    | 0.426521069 |
| cg11671363 | MIR145;LOC728264                | 3.34E-05    | 0.426519608 |
| cg23400512 | FLRT2                           | 1.96E-05    | 0.426461349 |
| cg11078221 |                                 | 8.60E-06    | 0.426449737 |
| cg00418880 | HS6ST3                          | 4.34E-05    | 0.426447317 |
| cg18417954 | C19orf51                        | 3.34E-05    | 0.426439237 |
| cg05109245 | GREB1L                          | 5.59E-05    | 0.426438248 |
| cg07781332 | ADAMTS19                        | 1.11E-05    | 0.426435497 |
| cg22614239 | ZIC4;ZIC4;ZIC4;ZIC4;ZIC4        | 1.50E-05    | 0.426427764 |
| cg09422450 |                                 | 0.000537905 | 0.426415483 |
| cg02041484 | NRF1                            | 1.96E-05    | 0.426379958 |
| cg26954174 | NOD2                            | 0.000117986 | 0.426368661 |
| cg15712559 | PHACTR3                         | 0.000148457 | 0.426366185 |
| cg21200129 | ELAVL2;ELAVL2;ELAVL2            | 1.96E-05    | 0.426345088 |
| cg06168950 |                                 | 3.30E-05    | 0.426333336 |
| cg09871315 | HOXA2                           | 4.34E-05    | 0.426330005 |
| cg02621287 |                                 | 5.59E-05    | 0.426321393 |
| cg03701992 | C21orf88;C21orf88               | 2.58E-05    | 0.426313596 |
| cg12414557 | RNF212;RNF212;RNF212;RNF212     | 0.000117986 | 0.426302963 |
| cg18626709 | LEPREL1;LEPREL1;LEPREL1         | 2.58E-05    | 0.426292945 |
| cg24280540 |                                 | 1.11E-05    | 0.426290308 |
| cg27579953 | LOC283392;TRHDE;LOC283392       | 5.11E-05    | 0.426286356 |

|            |                               |             |             |
|------------|-------------------------------|-------------|-------------|
| cg13713830 |                               | 3.34E-05    | 0.426264024 |
| cg08253808 | WDR20                         | 7.23E-05    | 0.426256598 |
| cg17846016 |                               | 7.23E-05    | 0.426255457 |
| cg25649000 | PTPRT;PTPRT                   | 0.000290372 | 0.426234542 |
| cg02081052 |                               | 4.34E-05    | 0.426227273 |
| cg14289542 |                               | 1.11E-05    | 0.426219534 |
| cg13468144 | ANKFY1                        | 1.50E-05    | 0.426207205 |
| cg16366473 | FGF12;FGF12                   | 4.34E-05    | 0.426198872 |
| cg00215432 | MIR375                        | 0.000290372 | 0.426184634 |
| cg26721193 |                               | 0.000117986 | 0.426166062 |
| cg14717170 | SLITRK3                       | 4.34E-05    | 0.426117322 |
| cg06124827 | MORN4;MORN4                   | 0.000791389 | 0.426105735 |
| cg11106652 |                               | 5.59E-05    | 0.426085096 |
| cg06533244 |                               | 8.60E-06    | 0.426022045 |
| cg05757967 | TPBG;TPBG                     | 0.002714607 | 0.426015371 |
| cg13274254 | GULP1;GULP1                   | 4.34E-05    | 0.426007846 |
| cg05421564 | FAM150A                       | 1.11E-05    | 0.426003462 |
| cg00348762 | DKFZP434H168;GNAO1;GNAO1      | 9.24E-05    | 0.425994631 |
| cg07516556 | LPCAT1                        | 1.96E-05    | 0.425985036 |
| cg15058464 | C20orf56                      | 0.00043997  | 0.425973977 |
| cg15577595 | ZNF804A                       | 2.58E-05    | 0.425969372 |
| cg08830502 |                               | 8.60E-06    | 0.425966872 |
| cg16615154 |                               | 8.60E-06    | 0.425952993 |
| cg08624648 |                               | 0.00043997  | 0.425948451 |
| cg03308652 |                               | 3.34E-05    | 0.425945859 |
| cg21053529 | GJD2                          | 8.60E-06    | 0.425938183 |
| cg24304919 | KCNN2                         | 1.11E-05    | 0.425923644 |
| cg06614469 | MAPK4                         | 0.000537905 | 0.425920844 |
| cg07603511 |                               | 1.11E-05    | 0.425919873 |
| cg14290904 | NKX2-1;NKX2-1                 | 1.50E-05    | 0.425902237 |
| cg07525077 | RNASE3                        | 0.000187194 | 0.425883332 |
| cg04006554 | ENPP5                         | 9.24E-05    | 0.425868238 |
| cg00026703 | NR2F2                         | 7.23E-05    | 0.425825577 |
| cg02574502 | CACNG8                        | 0.001948248 | 0.425812612 |
| cg16845486 | NELL2;NELL2;NELL2;NELL2;NELL2 | 0.000537905 | 0.425773713 |
| cg24621437 | SORCS1;SORCS1                 | 0.000654035 | 0.425761848 |
| cg00370229 |                               | 5.59E-05    | 0.425760306 |
| cg12315713 | CCDC67;CCDC67                 | 8.60E-06    | 0.42575227  |
| cg26654798 | BNC1                          | 8.60E-06    | 0.425751571 |
| cg01141721 | SRC;SRC                       | 7.23E-05    | 0.425748096 |
| cg09697978 | PRKD3                         | 1.50E-05    | 0.425737928 |
| cg13595556 |                               | 1.11E-05    | 0.425733355 |
| cg07504763 |                               | 8.60E-06    | 0.425714592 |
| cg04657224 | XKR6                          | 0.000357885 | 0.425713503 |
| cg20432211 |                               | 2.58E-05    | 0.425711891 |
| cg27501759 | OXTR                          | 3.34E-05    | 0.425709368 |
| cg15010903 | TIMP2                         | 1.50E-05    | 0.425686392 |
| cg14314071 | PMP22;PMP22;PMP22             | 1.11E-05    | 0.425666216 |
| cg16546016 | C4orf31                       | 1.50E-05    | 0.425593336 |
| cg19764599 | LHX8                          | 9.24E-05    | 0.425592131 |
| cg15834072 | DCHS2;DCHS2                   | 1.18E-05    | 0.425573254 |
| cg03726556 |                               | 2.58E-05    | 0.425573176 |
| cg08516516 | CDO1                          | 0.000526175 | 0.425568614 |
| cg15221604 | ROBO3                         | 0.000290372 | 0.425567965 |
| cg26894523 | ZNF718                        | 8.60E-06    | 0.425554313 |
| cg20723129 |                               | 3.34E-05    | 0.425548051 |
| cg12544191 |                               | 7.23E-05    | 0.425514927 |
| cg17403699 |                               | 1.11E-05    | 0.425498876 |
| cg17112958 | LYPD1;LYPD1                   | 1.11E-05    | 0.425495041 |
| cg24362812 | FAM38B                        | 0.000117986 | 0.425486252 |

|            |                                     |             |             |
|------------|-------------------------------------|-------------|-------------|
| cg05302420 | ENTPD7                              | 0.000290372 | 0.425484516 |
| cg01295392 | ASCL4;ASCL4                         | 8.60E-06    | 0.425468516 |
| cg23002590 | RPS6KA2;RPS6KA2                     | 0.000233422 | 0.425465317 |
| cg16080876 | NEFL                                | 1.50E-05    | 0.4254512   |
| cg25684151 |                                     | 3.34E-05    | 0.42543469  |
| cg00893471 | HOXD3                               | 7.23E-05    | 0.425431164 |
| cg03167683 | B4GALNT2;B4GALNT2;B4GALNT2;B4GALNT2 | 1.11E-05    | 0.42542413  |
| cg14526047 | C10orf53;C10orf53                   | 1.50E-05    | 0.425383842 |
| cg06015422 |                                     | 8.60E-06    | 0.425383601 |
| cg27307298 | RNF207                              | 1.11E-05    | 0.425378751 |
| cg07197785 |                                     | 0.000537905 | 0.425375069 |
| cg01088410 |                                     | 0.000187194 | 0.425357833 |
| cg17939805 |                                     | 3.34E-05    | 0.425339851 |
| cg10601582 | ZNF98                               | 9.24E-05    | 0.425337648 |
| cg14626375 | WASF3                               | 0.000117986 | 0.425330258 |
| cg25107254 | MTNR1A                              | 8.60E-06    | 0.425327919 |
| cg25752703 | KIAA1257                            | 3.34E-05    | 0.42531297  |
| cg08231710 | MMP23A;MMP23B                       | 2.58E-05    | 0.425282495 |
| cg04194947 |                                     | 1.96E-05    | 0.425274179 |
| cg14609407 | SLPI                                | 2.58E-05    | 0.425271575 |
| cg00066854 |                                     | 4.34E-05    | 0.425191003 |
| cg02069715 | GABRG3                              | 1.50E-05    | 0.425179557 |
| cg17320707 | EMX2;EMX2                           | 3.34E-05    | 0.425173176 |
| cg24868359 | GRIK1;GRIK1                         | 3.34E-05    | 0.425171721 |
| cg24091995 |                                     | 5.59E-05    | 0.42516592  |
| cg16506970 | KIAA0232;KIAA0232                   | 5.59E-05    | 0.425163998 |
| cg02572729 | DDAH1;DDAH1;DDAH1                   | 7.23E-05    | 0.425149391 |
| cg18591496 | CYP2A13                             | 5.59E-05    | 0.425130605 |
| cg17342807 |                                     | 7.23E-05    | 0.425111793 |
| cg02106850 | TBX18                               | 1.96E-05    | 0.425101932 |
| cg13611347 | NOL4                                | 0.000262362 | 0.425081498 |
| cg12886942 |                                     | 0.000148457 | 0.425080807 |
| cg05495351 | NRXN1;NRXN1                         | 3.34E-05    | 0.425029128 |
| cg00452199 | ACCS;ACCS                           | 9.24E-05    | 0.425025742 |
| cg11661868 | BOK                                 | 0.000187194 | 0.424999326 |
| cg24827600 | LASS6                               | 9.24E-05    | 0.424990843 |
| cg18568589 | ZNF560                              | 2.58E-05    | 0.424988991 |
| cg14344102 | PRDM13;PRDM13                       | 2.58E-05    | 0.424983195 |
| cg11672037 | SEMA6D;SEMA6D;SEMA6D;SEMA6D;SEMA6D  | 0.000791389 | 0.424972341 |
| cg05336395 | PCDH8;PCDH8                         | 8.60E-06    | 0.424971593 |
| cg25448856 | EEA1                                | 3.34E-05    | 0.424955605 |
| cg20779964 | CBLN4                               | 0.000148457 | 0.424954852 |
| cg02800607 | HPSE2;HPSE2;HPSE2;HPSE2             | 8.60E-06    | 0.424951188 |
| cg15523958 | PLEKHH2                             | 4.34E-05    | 0.424936866 |
| cg03402459 |                                     | 1.11E-05    | 0.424931224 |
| cg16063112 | C10orf107                           | 8.60E-06    | 0.424914983 |
| cg09588792 | SEPT10;ANKRD57;SEPT10               | 0.000233422 | 0.424896904 |
| cg03637815 |                                     | 7.23E-05    | 0.424889426 |
| cg03167429 | KIRREL3;KIRREL3;KIRREL3;KIRREL3     | 3.34E-05    | 0.424880883 |
| cg11793699 | NTRK1;INSRR                         | 0.000148457 | 0.424870075 |
| cg16962008 | C7orf57                             | 8.60E-06    | 0.424854326 |
| cg09052453 | ADAMTS19                            | 1.96E-05    | 0.424851897 |
| cg04202620 | ARHGEF10                            | 2.58E-05    | 0.424848844 |
| cg00130165 | EPHA5;EPHA5                         | 1.96E-05    | 0.424844666 |
| cg03457729 |                                     | 0.000148457 | 0.424836399 |
| cg12931029 | MNX1;MNX1                           | 8.60E-06    | 0.424810835 |
| cg04205943 | SCIN                                | 4.34E-05    | 0.424800523 |
| cg24921634 | MYO5B                               | 1.50E-05    | 0.424779836 |
| cg10741333 | RGS6                                | 1.96E-05    | 0.424766667 |
| cg08509172 | TM6SF2                              | 2.39E-05    | 0.424765589 |

|            |                               |             |             |
|------------|-------------------------------|-------------|-------------|
| cg19730379 | C10orf26;C10orf26             | 1.96E-05    | 0.424751531 |
| cg17838026 | KCNC3                         | 1.11E-05    | 0.424742922 |
| cg10173774 |                               | 8.60E-06    | 0.424707609 |
| cg26712080 | WNT5A                         | 0.000187194 | 0.424675654 |
| cg11345323 | PRKCZ                         | 0.004357816 | 0.424673418 |
| cg00174428 | LMX1A                         | 1.96E-05    | 0.42467135  |
| cg19529326 | EPB41L4A;FLJ11235;EPB41L4A    | 0.002266401 | 0.424616686 |
| cg14270292 | EYA4;EYA4;EYA4;EYA4;EYA4;EYA4 | 0.000654035 | 0.424567074 |
| cg08498254 |                               | 7.23E-05    | 0.424549555 |
| cg15466862 | SOX1                          | 1.96E-05    | 0.424535907 |
| cg17661642 |                               | 8.60E-06    | 0.424509862 |
| cg11036833 | CDO1                          | 0.000187194 | 0.424508344 |
| cg05893614 | FAM19A4;FAM19A4               | 8.60E-06    | 0.424501329 |
| cg18446110 | SLC23A1;SLC23A1               | 9.24E-05    | 0.424489317 |
| cg17412886 | ISL1                          | 0.000148457 | 0.424477505 |
| cg25933341 | SOX2OT;SOX2                   | 2.58E-05    | 0.424471014 |
| cg12565637 | IHH                           | 0.000334462 | 0.424461852 |
| cg07013734 | TRPC6                         | 4.34E-05    | 0.424458773 |
| cg05418105 |                               | 1.11E-05    | 0.424458676 |
| cg19727641 | MRAS;MRAS;MRAS                | 3.34E-05    | 0.42443763  |
| cg08475096 | GRIA2;GRIA2;GRIA2             | 1.96E-05    | 0.424434901 |
| cg04415731 |                               | 8.60E-06    | 0.424429723 |
| cg06894334 |                               | 1.50E-05    | 0.4244165   |
| cg01495122 | SFRP1                         | 1.96E-05    | 0.424415913 |
| cg22713444 | GNRHR2                        | 0.000187194 | 0.424370922 |
| cg09313917 | PRKAA2                        | 1.11E-05    | 0.424364563 |
| cg17138852 |                               | 5.59E-05    | 0.424363409 |
| cg14116122 | ALX1                          | 8.60E-06    | 0.42434849  |
| cg02961004 |                               | 0.000187194 | 0.424343081 |
| cg03531247 | NRXN1;NRXN1;NRXN1             | 2.58E-05    | 0.424319934 |
| cg09767822 | DBX1                          | 1.18E-05    | 0.424252148 |
| cg09477453 |                               | 1.11E-05    | 0.424248061 |
| cg00939495 | DRD5;DRD5                     | 0.000187194 | 0.424240993 |
| cg26837399 | NID1                          | 5.59E-05    | 0.424222755 |
| cg12666279 | DPP10;DPP10                   | 0.000148457 | 0.424220172 |
| cg00263760 | VAX1;VAX1                     | 8.60E-06    | 0.424219009 |
| cg17301902 | GNA14;GNA14                   | 8.60E-06    | 0.424218392 |
| cg25391815 |                               | 9.24E-05    | 0.424198781 |
| cg10614021 | GRIN2B                        | 4.34E-05    | 0.424178426 |
| cg05460130 | EIF5A2                        | 0.000117986 | 0.424174736 |
| cg20098887 | RAB32                         | 3.34E-05    | 0.424171367 |
| cg25796439 | ISM1                          | 0.000117986 | 0.424153679 |
| cg20318166 | ALPK3                         | 0.00043997  | 0.424150115 |
| cg04350675 |                               | 0.001376172 | 0.42413711  |
| cg15058210 | HDAC4                         | 0.000148457 | 0.424131984 |
| cg04028634 | ADCY1                         | 0.000290372 | 0.424124982 |
| cg26205771 | NPBWR1                        | 5.59E-05    | 0.42412366  |
| cg22537474 | SNAP25;SNAP25                 | 1.96E-05    | 0.424110217 |
| cg04006722 | GLRB;GLRB;GLRB                | 3.34E-05    | 0.424091232 |
| cg17783401 | RGS20                         | 7.23E-05    | 0.42408541  |
| cg04267526 |                               | 0.000233422 | 0.424079143 |
| cg27288226 |                               | 2.58E-05    | 0.424066446 |
| cg21606928 |                               | 0.00043997  | 0.424056165 |
| cg07495389 | MAPRE3                        | 1.96E-05    | 0.424049116 |
| cg03336086 | THBS4;THBS4                   | 1.50E-05    | 0.424019007 |
| cg09222749 | LHX8                          | 1.50E-05    | 0.423998317 |
| cg03574723 | GPR26                         | 8.60E-06    | 0.42398773  |
| cg22822803 | WDR8                          | 8.60E-06    | 0.423977322 |
| cg07351192 |                               | 3.34E-05    | 0.423957943 |
| cg04075726 |                               | 3.34E-05    | 0.423931526 |

|            |                                       |             |             |
|------------|---------------------------------------|-------------|-------------|
| cg18674980 | CA3                                   | 1.50E-05    | 0.423922448 |
| cg01036409 | FAM20A                                | 0.000148457 | 0.423917918 |
| cg19205994 | PLD5                                  | 0.000148457 | 0.423909233 |
| cg06391468 | SOX9;SOX9                             | 7.23E-05    | 0.423908706 |
| cg10236224 |                                       | 0.000262362 | 0.423895105 |
| cg00773902 | GDF1;LASS1;LASS1                      | 0.000955793 | 0.423892424 |
| cg22665692 | DOCK1                                 | 0.000537905 | 0.423884827 |
| cg09831105 | ANKS1B;ANKS1B;ANKS1B                  | 3.34E-05    | 0.423871814 |
| cg06582394 | CASR;CASR                             | 1.50E-05    | 0.423868854 |
| cg15166311 |                                       | 4.34E-05    | 0.423867069 |
| cg14201424 | MGC45800                              | 0.000187194 | 0.423853054 |
| cg11196437 | LHX8                                  | 2.58E-05    | 0.423850714 |
| cg18243760 | PRRT1                                 | 4.34E-05    | 0.423849967 |
| cg16316624 | TMEM216                               | 0.000791389 | 0.423831966 |
| cg03348161 | MS4A3;MS4A3;MS4A3                     | 0.000117986 | 0.423831034 |
| cg24430140 |                                       | 9.24E-05    | 0.423819008 |
| cg23243463 | BRUNOL4;BRUNOL4;BRUNOL4;BRUNOL4       | 0.000187194 | 0.423808655 |
| cg24202131 | BRUNOL4;BRUNOL4;BRUNOL4;BRUNOL4       | 8.60E-06    | 0.423806286 |
| cg08063317 | GABRB3;GABRB3                         | 2.58E-05    | 0.423758942 |
| cg25985659 | FAM155A                               | 1.50E-05    | 0.423744436 |
| cg01791371 |                                       | 1.96E-05    | 0.423743777 |
| cg27280396 | RORA                                  | 5.59E-05    | 0.423737568 |
| cg19940537 | BICC1                                 | 1.96E-05    | 0.423714331 |
| cg17227967 | C20orf103                             | 0.000148457 | 0.423713678 |
| cg09571420 | CNTNAP2                               | 0.000187194 | 0.423707493 |
| cg26142412 |                                       | 0.000148457 | 0.42370723  |
| cg21529405 | CBLN2                                 | 8.60E-06    | 0.423683913 |
| cg21121843 | HTT                                   | 0.000148457 | 0.423668326 |
| cg22007227 | ZBTB8B                                | 5.59E-05    | 0.423666024 |
| cg07480762 | PLCH1                                 | 7.23E-05    | 0.423640137 |
| cg24275315 | NKX6-1                                | 8.60E-06    | 0.423627022 |
| cg23990012 |                                       | 4.34E-05    | 0.423622502 |
| cg17817709 | PLOD2;PLOD2                           | 8.60E-06    | 0.423617675 |
| cg04430911 | OSCP1;OSCP1                           | 2.39E-05    | 0.423606392 |
| cg22130145 |                                       | 1.96E-05    | 0.423605158 |
| cg09017434 | MARCH11                               | 2.08E-05    | 0.423588089 |
| cg20676716 | HOXD1                                 | 8.60E-06    | 0.423577674 |
| cg19503977 | HTR1B                                 | 3.34E-05    | 0.423569908 |
| cg16940012 |                                       | 1.11E-05    | 0.423567474 |
| cg12323274 | BRUNOL4;BRUNOL4;BRUNOL4;BRUNOL4       | 9.24E-05    | 0.423560019 |
| cg02347074 | PAX3;PAX3;PAX3;PAX3;PAX3;PAX3         | 1.11E-05    | 0.423513903 |
| cg09500672 | LYPD6                                 | 1.50E-05    | 0.423501248 |
| cg05710997 | ISL1                                  | 1.50E-05    | 0.423483472 |
| cg26582643 | C20orf103;C20orf103                   | 0.001948248 | 0.423480151 |
| cg25308508 |                                       | 1.96E-05    | 0.423475499 |
| cg17046890 | HOXB8                                 | 8.60E-06    | 0.423468355 |
| cg23588462 |                                       | 0.000117986 | 0.423456839 |
| cg13454407 | KCNV1                                 | 8.60E-06    | 0.423445649 |
| cg25336332 | THRB;THRB;THRB                        | 0.000357885 | 0.423428103 |
| cg09980058 | COMP                                  | 5.59E-05    | 0.423411737 |
| cg24218109 | SH3BGRL2;SH3BGRL2                     | 2.58E-05    | 0.423398153 |
| cg00592781 |                                       | 3.34E-05    | 0.423386514 |
| cg22714094 | NPY1R                                 | 5.59E-05    | 0.423385197 |
| cg06468908 | COL25A1;COL25A1;COL25A1;COL25A1       | 8.60E-06    | 0.42337416  |
| cg00261690 | SNHG3-RCC1;SNHG3-RCC1;SNHG3-RCC1;RCC1 | 3.34E-05    | 0.423357267 |
| cg20419307 | PPFIA2                                | 1.11E-05    | 0.423353571 |
| cg09273641 | PHF21B;PHF21B                         | 4.34E-05    | 0.423351696 |
| cg19890879 |                                       | 1.11E-05    | 0.423349055 |
| cg02928664 | CDC42EP5                              | 0.000117986 | 0.423285117 |
| cg24789487 | FAM171B;FAM171B                       | 0.000117986 | 0.423278437 |

|            |                                      |             |             |
|------------|--------------------------------------|-------------|-------------|
| cg04684516 | SNCAIP;SNCAIP                        | 5.59E-05    | 0.42327511  |
| cg15462887 | BDNF                                 | 8.60E-06    | 0.423267032 |
| cg26945715 | TBC1D12                              | 1.50E-05    | 0.423245074 |
| cg26476852 | HOXA9                                | 3.34E-05    | 0.423232365 |
| cg18595065 |                                      | 1.50E-05    | 0.423159831 |
| cg02352240 |                                      | 1.50E-05    | 0.423158967 |
| cg13161658 | KCNA4                                | 4.34E-05    | 0.42315677  |
| cg17410650 |                                      | 1.50E-05    | 0.423152746 |
| cg13654588 | PRLHR                                | 2.58E-05    | 0.423136059 |
| cg07788348 | CADPS2;CADPS2;CADPS2                 | 3.34E-05    | 0.42312846  |
| cg02503763 | MGLL;MGLL                            | 0.000955793 | 0.423080114 |
| cg06704093 |                                      | 8.60E-06    | 0.423064153 |
| cg02753029 |                                      | 8.60E-06    | 0.423058466 |
| cg10249705 | GUCY1A2                              | 7.23E-05    | 0.423048064 |
| cg22834653 | FGF12                                | 1.18E-05    | 0.42304479  |
| cg06296331 | NCKAP5;NCKAP5                        | 2.58E-05    | 0.423005934 |
| cg22642777 | PPP2R2B;PPP2R2B;PPP2R2B;PPP2R2B;PPP2 | 1.11E-05    | 0.423005168 |
| cg10809491 | TDH                                  | 8.60E-06    | 0.422977523 |
| cg24004483 |                                      | 0.000187194 | 0.422977027 |
| cg23987444 | SLC18A3;CHAT                         | 3.34E-05    | 0.422965289 |
| cg24393673 | OLFM3                                | 2.58E-05    | 0.422946693 |
| cg03805475 |                                      | 7.23E-05    | 0.422937968 |
| cg27123392 | GABPB1;GABPB1                        | 2.58E-05    | 0.422933482 |
| cg14096889 | ADAMTSL3                             | 8.60E-06    | 0.422927684 |
| cg13496979 |                                      | 1.96E-05    | 0.422915204 |
| cg16802646 | WWC1;WWC1;WWC1                       | 0.000117986 | 0.422893545 |
| cg10599384 | PCDHGA1;PCDHGA1                      | 0.000187194 | 0.422884012 |
| cg02313850 | BMPR1A                               | 0.000791389 | 0.42288131  |
| cg14777561 | DBX1                                 | 4.34E-05    | 0.422875226 |
| cg19821713 |                                      | 8.60E-06    | 0.422860826 |
| cg03758467 | PCDHA2;PCDHA1;PCDHA1;PCDHA6;PCDHA5   | 8.60E-06    | 0.422855897 |
| cg17941572 |                                      | 0.000955793 | 0.422850252 |
| cg12756396 | DMRTA2                               | 4.34E-05    | 0.422846932 |
| cg20702559 | FAM110B                              | 0.000791389 | 0.42282444  |
| cg05543049 | NLGN1                                | 1.11E-05    | 0.422815371 |
| cg01996714 |                                      | 1.11E-05    | 0.422798273 |
| cg27191517 | NMU;NMU                              | 0.000187194 | 0.422791077 |
| cg01670677 | PHOX2A                               | 5.59E-05    | 0.42278083  |
| cg23294090 | FAM135B                              | 0.000117986 | 0.422770699 |
| cg16032162 | C10orf41;ZNF503                      | 9.24E-05    | 0.422769748 |
| cg23600372 |                                      | 2.58E-05    | 0.422755555 |
| cg25365934 |                                      | 1.96E-05    | 0.422751087 |
| cg00852549 | NXPH1                                | 5.59E-05    | 0.422713108 |
| cg13086983 | ECE1                                 | 0.000233422 | 0.422676742 |
| cg21170682 |                                      | 1.11E-05    | 0.422667531 |
| cg00976453 | KCNB1                                | 0.000357885 | 0.422647972 |
| cg03919781 | EFHA2                                | 8.60E-06    | 0.422646403 |
| cg09123188 |                                      | 5.59E-05    | 0.422619412 |
| cg07704934 | ALX4                                 | 1.11E-05    | 0.422619405 |
| cg06159603 | CADPS2;CADPS2;CADPS2                 | 0.000117986 | 0.422615212 |
| cg23748340 |                                      | 1.96E-05    | 0.422594733 |
| cg01938650 | PCDH7;PCDH7;PCDH7                    | 1.96E-05    | 0.422583351 |
| cg07744166 | WASF3                                | 1.50E-05    | 0.42257099  |
| cg01758512 | FUT9;FUT9                            | 1.96E-05    | 0.422563791 |
| cg10912240 | FOXG1                                | 1.11E-05    | 0.422544188 |
| cg26094789 | PAX9                                 | 2.58E-05    | 0.422542565 |
| cg06987468 | WNT2;WNT2                            | 1.50E-05    | 0.422532767 |
| cg07586235 |                                      | 0.000290372 | 0.422532628 |
| cg20100745 | NDRG1;NDRG1                          | 0.000537905 | 0.422519111 |
| cg00963378 | GJA3                                 | 9.24E-05    | 0.422516537 |

|            |                                    |             |             |
|------------|------------------------------------|-------------|-------------|
| cg02570563 | GPR39;GPR39                        | 2.58E-05    | 0.422507251 |
| cg11459714 | KLK10;KLK10;KLK10                  | 1.11E-05    | 0.422506618 |
| cg26911220 |                                    | 1.11E-05    | 0.422506409 |
| cg12589298 | KCNC3                              | 0.000233422 | 0.422501482 |
| cg13236389 |                                    | 3.34E-05    | 0.422458489 |
| cg22380033 | GRB14;GRB14                        | 0.000148457 | 0.422455807 |
| cg11097433 | SORCS1;SORCS1                      | 0.000187194 | 0.422453246 |
| cg13658899 | LHX3;LHX3                          | 4.34E-05    | 0.42245107  |
| cg14567963 |                                    | 0.000117986 | 0.422422001 |
| cg26890189 | SLC8A2                             | 4.34E-05    | 0.422419188 |
| cg06090660 | CDH2                               | 0.000654035 | 0.422369087 |
| cg00720159 |                                    | 0.000290372 | 0.422368046 |
| cg13549845 | GRID2                              | 1.50E-05    | 0.42234536  |
| cg13448753 | LOC100128811;GPR158                | 8.60E-06    | 0.422328035 |
| cg09416908 | ME3;ME3;ME3                        | 0.000290372 | 0.422325169 |
| cg08612100 | HS6ST3                             | 1.50E-05    | 0.422324629 |
| cg17459431 | KCNK1                              | 0.001147425 | 0.422322814 |
| cg11247817 | LNPEP;LNPEP;LNPEP                  | 9.24E-05    | 0.422295996 |
| cg02683759 |                                    | 0.000233422 | 0.422288988 |
| cg04452203 |                                    | 7.23E-05    | 0.422279065 |
| cg22266749 | COL25A1;COL25A1                    | 1.11E-05    | 0.422259602 |
| cg18902090 | PCDHA7;PCDHA12;PCDHA6;PCDHAC1;PCDH | 8.60E-06    | 0.422248991 |
| cg03801286 | KCNE1                              | 4.34E-05    | 0.422232191 |
| cg25217100 | C13orf36                           | 8.60E-06    | 0.422187204 |
| cg14512563 |                                    | 1.96E-05    | 0.422172756 |
| cg17164747 | CCDC149;CCDC149                    | 0.000290372 | 0.422170066 |
| cg22717014 | PITX2;PITX2;PITX2                  | 1.11E-05    | 0.422167253 |
| cg05858607 | DOCK1                              | 0.000654035 | 0.422164521 |
| cg02746725 | HOXD1                              | 1.50E-05    | 0.422143276 |
| cg06289802 | SLC9A3R1                           | 3.34E-05    | 0.422105832 |
| cg07754999 | PITX3                              | 9.24E-05    | 0.422100242 |
| cg07463541 | PCDHA2;PCDHA1;PCDHA3;PCDHA3;PCDHA1 | 7.23E-05    | 0.422087454 |
| cg04506585 | SOX9                               | 3.34E-05    | 0.422078317 |
| cg24244374 |                                    | 1.11E-05    | 0.422073119 |
| cg00078299 | ZHX1;ZHX1                          | 7.23E-05    | 0.422041781 |
| cg18369866 | POU4F3                             | 1.96E-05    | 0.42203273  |
| cg24244752 | GABRA2;GABRA2                      | 5.59E-05    | 0.422025695 |
| cg22336004 | PDE4B;PDE4B                        | 8.60E-06    | 0.422023    |
| cg08042975 | ERBB4;ERBB4                        | 5.59E-05    | 0.42200116  |
| cg20875821 | SERPINB2;SERPINB2                  | 1.11E-05    | 0.421994862 |
| cg18915856 |                                    | 1.50E-05    | 0.421970235 |
| cg09147777 | GRIA4;GRIA4;GRIA4;GRIA4            | 4.34E-05    | 0.421966679 |
| cg25208863 | GOLSYN;GOLSYN;GOLSYN;GOLSYN;GOLSYN | 9.24E-05    | 0.421965243 |
| cg01794426 | PAX9                               | 9.24E-05    | 0.421950028 |
| cg00678890 | SLC12A5;SLC12A5                    | 8.60E-06    | 0.421933396 |
| cg02387803 | ZIC4;ZIC4;ZIC4                     | 5.59E-05    | 0.421917018 |
| cg26332560 | ADCY8                              | 1.50E-05    | 0.421902799 |
| cg07186154 | SLC5A7                             | 8.60E-06    | 0.421898814 |
| cg03340466 | FAM163A                            | 8.60E-06    | 0.421882704 |
| cg18278638 | SLC7A14                            | 8.60E-06    | 0.421875198 |
| cg12859211 | ROBO3                              | 0.000866489 | 0.421868479 |
| cg01763719 |                                    | 0.000537905 | 0.42186282  |
| cg05603546 |                                    | 9.24E-05    | 0.421861773 |
| cg05107535 |                                    | 1.96E-05    | 0.42184481  |
| cg08315174 | NKX2-1                             | 3.34E-05    | 0.421842015 |
| cg24872782 | FBXL7                              | 0.000148457 | 0.421838159 |
| cg13443627 | TACSTD2;TACSTD2                    | 4.34E-05    | 0.42182381  |
| cg18932798 | INA                                | 0.000117986 | 0.421816606 |
| cg13378934 | MEIS3;MEIS3                        | 1.96E-05    | 0.421806681 |
| cg05716166 | RALYL;RALYL;RALYL;RALYL;RALYL      | 0.000148457 | 0.421792767 |

|            |                                      |             |             |
|------------|--------------------------------------|-------------|-------------|
| cg03476860 |                                      | 8.60E-06    | 0.421789955 |
| cg25105688 |                                      | 5.59E-05    | 0.421776214 |
| cg00234691 | SV2C                                 | 0.000117986 | 0.421765554 |
| cg01058360 | PRKAG2;PRKAG2                        | 7.23E-05    | 0.421728336 |
| cg12306156 | THRB;THRB;THRB                       | 0.000148457 | 0.421724123 |
| cg01240056 |                                      | 4.34E-05    | 0.421723118 |
| cg14457782 | WNK4                                 | 2.58E-05    | 0.421701321 |
| cg08641579 | MAGI2                                | 1.50E-05    | 0.421700719 |
| cg05945059 | RAX;RAX                              | 9.24E-05    | 0.421660181 |
| cg00419321 | LHX8                                 | 2.08E-05    | 0.421642182 |
| cg10836101 | VSTM2B                               | 8.60E-06    | 0.421637741 |
| cg05547777 |                                      | 1.96E-05    | 0.421637524 |
| cg26248075 | SIM1                                 | 1.96E-05    | 0.421581864 |
| cg03160466 | OTOP1                                | 0.000117986 | 0.421566098 |
| cg05372113 | CYP2A13                              | 9.24E-05    | 0.421543294 |
| cg00677986 | PAWR                                 | 0.000233422 | 0.421532888 |
| cg13940693 | ADCYAP1;ADCYAP1                      | 8.60E-06    | 0.421530765 |
| cg24328125 |                                      | 8.60E-06    | 0.42151956  |
| cg19089701 |                                      | 0.000148457 | 0.421458491 |
| cg06374325 | NKX6-1                               | 1.11E-05    | 0.421451017 |
| cg20140110 | TMTC1                                | 8.60E-06    | 0.42144554  |
| cg26124980 | ATOH1                                | 8.60E-06    | 0.42141394  |
| cg10617909 |                                      | 0.001948248 | 0.42140714  |
| cg19021076 | TMEM101                              | 3.34E-05    | 0.421371657 |
| cg25363885 | PPP2R2B;PPP2R2B;PPP2R2B;PPP2R2B;PPP2 | 0.000117986 | 0.421366206 |
| cg10591652 | FBLL1                                | 8.60E-06    | 0.421351399 |
| cg19931348 | PI3                                  | 1.11E-05    | 0.421344776 |
| cg05619892 | ZMAT4;ZMAT4                          | 3.34E-05    | 0.421293333 |
| cg04716990 | MACROD2                              | 9.24E-05    | 0.421279825 |
| cg21200539 | POU4F2                               | 1.96E-05    | 0.421273932 |
| cg08684893 | ZNF225                               | 0.001147425 | 0.421251825 |
| cg19188182 | LOC283392;TRHDE;LOC283392            | 1.50E-05    | 0.421251426 |
| cg14312538 | CDH2                                 | 0.000117986 | 0.421237823 |
| cg14314744 | SIM1                                 | 2.58E-05    | 0.421222664 |
| cg07578695 | SLC34A2                              | 0.000290372 | 0.421172723 |
| cg10827754 |                                      | 5.59E-05    | 0.421140203 |
| cg24412079 | GALNT13                              | 8.60E-06    | 0.421126096 |
| cg24992181 | GOLSYN;GOLSYN;GOLSYN;GOLSYN;GOLSYN   | 0.000187194 | 0.421117815 |
| cg09662034 | TFAP2C                               | 3.34E-05    | 0.421113883 |
| cg18759960 | PTF1A                                | 3.34E-05    | 0.421102578 |
| cg25025545 | CD83;CD83                            | 7.23E-05    | 0.421079542 |
| cg09342997 | NRF1;NRF1                            | 7.23E-05    | 0.421069284 |
| cg19403014 | LHCGR                                | 1.50E-05    | 0.421061792 |
| cg24691336 |                                      | 1.50E-05    | 0.421017721 |
| cg15839448 | SFRP1                                | 5.59E-05    | 0.421016897 |
| cg11935248 | CDYL;CDYL;CDYL;CDYL                  | 0.000357885 | 0.421007972 |
| cg04136610 | ADAMTS16                             | 0.000117986 | 0.421002009 |
| cg06684850 | BDNF;BDNF;BDNF;BDNF;BDNF             | 4.34E-05    | 0.420963143 |
| cg19721867 | SLC18A2                              | 0.00043997  | 0.420949739 |
| cg03062549 |                                      | 4.34E-05    | 0.420938135 |
| cg09550083 | MEIS1                                | 0.000148457 | 0.420929745 |
| cg20618622 | NPY5R                                | 4.34E-05    | 0.420918856 |
| cg07489890 | NLGN1                                | 8.60E-06    | 0.420859288 |
| cg09169320 |                                      | 0.000117986 | 0.420829002 |
| cg22066180 |                                      | 1.50E-05    | 0.420815729 |
| cg14731653 | CRYBA2;CRYBA2;CRYBA2                 | 4.34E-05    | 0.420796909 |
| cg02952913 | ZNF124                               | 0.000148457 | 0.420793908 |
| cg06452665 | TNFSF11;TNFSF11;TNFSF11              | 0.000148457 | 0.420766376 |
| cg24196693 | PCDH21                               | 8.60E-06    | 0.420711948 |
| cg11483915 | SLC40A1                              | 2.58E-05    | 0.42070567  |



|            |                                         |             |             |
|------------|-----------------------------------------|-------------|-------------|
| cg10639440 | SCRN1;SCRN1;SCRN1;SCRN1                 | 0.001376172 | 0.420702335 |
| cg01581018 | ZIC4;ZIC4;ZIC4;ZIC4;ZIC4                | 8.60E-06    | 0.420694379 |
| cg00796963 | KIAA1009                                | 9.24E-05    | 0.420689558 |
| cg27442308 | SOX21                                   | 0.000148457 | 0.420686332 |
| cg06596654 |                                         | 1.50E-05    | 0.420658791 |
| cg11089595 | RALYL;RALYL;RALYL                       | 1.11E-05    | 0.420654233 |
| cg20804700 | MCOLN2                                  | 0.000537905 | 0.420645602 |
| cg09563216 | C1orf51;C1orf51                         | 2.58E-05    | 0.420639138 |
| cg04637478 | PCDHGA4;PCDHGA1;PCDHGA6;PCDHGA5;PCDHGA3 | 1.50E-05    | 0.420619247 |
| cg26699292 |                                         | 1.96E-05    | 0.42060761  |
| cg23710218 | MSC;MSC                                 | 2.58E-05    | 0.420599069 |
| cg25295727 |                                         | 0.000148457 | 0.420591875 |
| cg01012089 |                                         | 8.60E-06    | 0.420586366 |
| cg15133448 | GPR120                                  | 8.60E-06    | 0.420585485 |
| cg18801691 | DCC                                     | 1.50E-05    | 0.420584824 |
| cg06564900 | FIGN                                    | 0.000187194 | 0.420563534 |
| cg26808747 | ADAM12;ADAM12                           | 3.34E-05    | 0.420547154 |
| cg13262687 | POU4F2                                  | 1.50E-05    | 0.420540478 |
| cg20554228 | SCRN1;SCRN1;SCRN1;SCRN1                 | 0.000290372 | 0.420526864 |
| cg01972418 | PAX9                                    | 7.23E-05    | 0.420509386 |
| cg17090611 | ZDHHC2                                  | 3.34E-05    | 0.420498435 |
| cg05817517 | CSMD2                                   | 3.34E-05    | 0.420493142 |
| cg06399302 | CHST8;CHST8                             | 1.50E-05    | 0.420488615 |
| cg26320696 | PARVA                                   | 8.60E-06    | 0.420483342 |
| cg00341742 | RPRM                                    | 1.96E-05    | 0.420430377 |
| cg06102602 |                                         | 0.00043997  | 0.42042776  |
| cg05372730 |                                         | 9.24E-05    | 0.420418844 |
| cg07931391 |                                         | 0.000187194 | 0.420404582 |
| cg22782271 | FUT9                                    | 8.60E-06    | 0.420384369 |
| cg16421526 | ARSJ                                    | 0.000148457 | 0.420366133 |
| cg27492103 | ASXL2                                   | 7.23E-05    | 0.420339234 |
| cg12709880 | NPC1                                    | 1.11E-05    | 0.420336465 |
| cg01302656 | C14orf23                                | 9.24E-05    | 0.420335859 |
| cg15106134 | SOX20T;SOX2                             | 1.50E-05    | 0.42030543  |
| cg23318063 |                                         | 2.58E-05    | 0.420286673 |
| cg20598190 |                                         | 0.000537905 | 0.420262036 |
| cg07676002 | CDH22;CDH22                             | 8.60E-06    | 0.420249461 |
| cg17939295 |                                         | 2.58E-05    | 0.420244217 |
| cg08347047 | C12orf39                                | 4.34E-05    | 0.420216087 |
| cg15069906 | BMP7                                    | 0.000357885 | 0.420201329 |
| cg26345105 |                                         | 8.60E-06    | 0.420190476 |
| cg00116092 |                                         | 2.58E-05    | 0.420189475 |
| cg04293733 | MIR137                                  | 4.34E-05    | 0.420183781 |
| cg11284316 | UNC80;UNC80                             | 0.000117986 | 0.420183713 |
| cg07394446 | ADAMTS17                                | 0.000148457 | 0.420171509 |
| cg17228942 | NLRP14;ZNF214;NLRP14                    | 0.000117986 | 0.42015484  |
| cg21953346 | CADPS2;CADPS2;CADPS2                    | 0.000537905 | 0.420141052 |
| cg26070319 |                                         | 1.50E-05    | 0.420134061 |
| cg02225716 | MAL2                                    | 8.60E-06    | 0.420133987 |
| cg10464312 | MEIS1                                   | 1.50E-05    | 0.420120636 |
| cg05871694 | HOXD1;HOXD1                             | 1.50E-05    | 0.420117837 |
| cg23016129 | SPAG6;SPAG6                             | 0.000117986 | 0.420100772 |
| cg23839680 | CCT6A;PSPH;CCT6A                        | 0.000205664 | 0.420097566 |
| cg05822100 | CDH6                                    | 1.96E-05    | 0.420093338 |
| cg11940177 | PGAM1                                   | 3.34E-05    | 0.420066379 |
| cg23670353 | FGGY;FGGY                               | 0.001147425 | 0.420031551 |
| cg11787785 | NEBL                                    | 0.000654035 | 0.420016307 |
| cg26802289 |                                         | 0.000262362 | 0.420002786 |
| cg14530233 | XKR6                                    | 0.000148457 | 0.419985273 |
| cg11755405 | KCNH5;KCNH5;KCNH5                       | 0.000148457 | 0.419966664 |

|            |                                    |             |             |
|------------|------------------------------------|-------------|-------------|
| cg12387713 | MSX2                               | 1.60E-05    | 0.419951786 |
| cg22324567 | EBF2                               | 8.60E-06    | 0.419931545 |
| cg03250019 | LOC642597;LOC642597                | 3.34E-05    | 0.419918828 |
| cg26959358 | RUNX1T1                            | 1.50E-05    | 0.419913152 |
| cg09497201 |                                    | 0.000187194 | 0.419883133 |
| cg11708136 |                                    | 1.50E-05    | 0.419882102 |
| cg07345999 |                                    | 1.50E-05    | 0.419841947 |
| cg13243169 | GRID2                              | 1.96E-05    | 0.419835495 |
| cg00626110 | NKX6-2                             | 1.18E-05    | 0.419834331 |
| cg07691705 | MNX1;MNX1                          | 8.60E-06    | 0.419825586 |
| cg13146839 | LOC647309;LOC647309                | 0.000290372 | 0.419811477 |
| cg00400733 |                                    | 2.58E-05    | 0.419799123 |
| cg03850957 | SNRPB2;SNRPB2                      | 5.59E-05    | 0.419791117 |
| cg15602074 | HTR1B                              | 8.60E-06    | 0.41976899  |
| cg08969532 | CRTAC1;CRTAC1                      | 5.59E-05    | 0.419762453 |
| cg21276413 | GABRA5;GABRA5;GABRA5               | 0.000654035 | 0.419759998 |
| cg15085791 |                                    | 4.34E-05    | 0.419746715 |
| cg01806520 |                                    | 9.24E-05    | 0.419721742 |
| cg22190437 | SPHKAP;SPHKAP                      | 5.59E-05    | 0.41967695  |
| cg04151278 | GPR149                             | 1.50E-05    | 0.419670075 |
| cg12217987 | UGT8                               | 5.59E-05    | 0.419654096 |
| cg09841889 |                                    | 0.000187194 | 0.419639945 |
| cg05927068 | THEM4                              | 5.59E-05    | 0.41962487  |
| cg06484146 | VWDE                               | 2.58E-05    | 0.419616279 |
| cg13468418 |                                    | 1.50E-05    | 0.419589487 |
| cg02004641 | PCDHA7;PCDHA12;PCDHA6;PCDHAC1;PCDH | 5.59E-05    | 0.41956398  |
| cg22437405 |                                    | 1.96E-05    | 0.419546741 |
| cg14317285 | SOX2OT                             | 2.58E-05    | 0.419530104 |
| cg12839593 | SIX1                               | 8.60E-06    | 0.419522961 |
| cg21792134 | IQCB1;IQCB1                        | 2.58E-05    | 0.419518318 |
| cg11139646 | BMP8B                              | 0.000117986 | 0.419507423 |
| cg03012170 |                                    | 8.60E-06    | 0.419502377 |
| cg14654533 | NUDT16P;NUDT16P                    | 3.34E-05    | 0.419468494 |
| cg01787574 | LMO3;LMO3                          | 8.60E-06    | 0.419467765 |
| cg08592761 | LARP6;LARP6                        | 1.96E-05    | 0.419463195 |
| cg24988625 | EDIL3                              | 8.60E-06    | 0.419441844 |
| cg01213381 | OTX2                               | 7.23E-05    | 0.419428463 |
| cg04002608 | CXCL14                             | 8.60E-06    | 0.419414893 |
| cg14880228 | PCDP1                              | 1.96E-05    | 0.419353787 |
| cg02098029 |                                    | 1.50E-05    | 0.419342514 |
| cg18652346 |                                    | 9.24E-05    | 0.419331728 |
| cg10994511 | ADCY2                              | 7.23E-05    | 0.419326392 |
| cg15029631 | SCN8A                              | 2.58E-05    | 0.419319385 |
| cg21688264 | SNAP91;SNAP91                      | 0.000791389 | 0.419318552 |
| cg10876767 | SORCS2                             | 3.34E-05    | 0.419281215 |
| cg17276590 | EMX2OS;EMX2;EMX2                   | 0.000187194 | 0.419275547 |
| cg00067824 |                                    | 1.96E-05    | 0.419267391 |
| cg02800810 | ADAMTS5                            | 8.60E-06    | 0.419239435 |
| cg15090005 | RBP7                               | 1.11E-05    | 0.419227129 |
| cg15728256 | BMP8B;BMP8B                        | 9.24E-05    | 0.419205509 |
| cg15471177 | PARD3B;PARD3B;PARD3B               | 4.34E-05    | 0.419186595 |
| cg22513924 | NMNAT2                             | 9.24E-05    | 0.419183746 |
| cg09462808 | SYNPR                              | 3.34E-05    | 0.419166027 |
| cg26885268 |                                    | 8.60E-06    | 0.419144458 |
| cg12475879 |                                    | 1.50E-05    | 0.41910235  |
| cg27109600 | FLJ32063                           | 0.000122184 | 0.419099313 |
| cg08400494 | CARS2                              | 7.23E-05    | 0.419073299 |
| cg17393267 | FGF12;FGF12                        | 1.50E-05    | 0.419069058 |
| cg23668285 | SOX1;SOX1                          | 4.34E-05    | 0.419060216 |
| cg15425280 | GRIA2;GRIA2;GRIA2                  | 8.60E-06    | 0.419016912 |

|            |                               |             |             |
|------------|-------------------------------|-------------|-------------|
| cg01100912 | EFNA5                         | 0.000187194 | 0.419016819 |
| cg23589035 | ASH1L                         | 0.000148457 | 0.419001113 |
| cg10644072 | DSCAM                         | 8.60E-06    | 0.41899562  |
| cg12743978 | CHODL                         | 8.60E-06    | 0.418989663 |
| cg09048251 |                               | 0.000233422 | 0.418970124 |
| cg04264042 | ATP6V0A1;ATP6V0A1;ATP6V0A1    | 8.60E-06    | 0.418967118 |
| cg06272543 | LOC440925;SP5                 | 0.000148457 | 0.418957562 |
| cg24857620 | NPBWR1                        | 0.000654035 | 0.418957029 |
| cg12586150 | SERPINB1                      | 0.000357885 | 0.418943384 |
| cg10028625 | ECT2                          | 9.24E-05    | 0.418931029 |
| cg23662142 |                               | 4.34E-05    | 0.418904693 |
| cg08368654 |                               | 3.34E-05    | 0.418855022 |
| cg08279189 | TRIM27                        | 4.34E-05    | 0.418850648 |
| cg17487050 | RUNX1T1                       | 8.60E-06    | 0.418836548 |
| cg20704555 | JAZF1                         | 1.96E-05    | 0.418805934 |
| cg27510066 | CSGALNACT1;CSGALNACT1         | 1.96E-05    | 0.418785062 |
| cg16695576 |                               | 5.59E-05    | 0.41878487  |
| cg24420366 |                               | 2.58E-05    | 0.418782893 |
| cg05872306 | FOXG1                         | 8.60E-06    | 0.418775755 |
| cg07333715 | ASCL2                         | 0.003734675 | 0.418705333 |
| cg18867200 |                               | 3.34E-05    | 0.418696767 |
| cg16509851 |                               | 0.000148457 | 0.418691581 |
| cg08535260 |                               | 0.000158823 | 0.418684577 |
| cg15978039 | MEIS1                         | 1.50E-05    | 0.418665186 |
| cg26177213 | FO XK1                        | 9.24E-05    | 0.418662777 |
| cg00325750 |                               | 0.000290372 | 0.418656293 |
| cg05297121 | NPNT                          | 3.34E-05    | 0.418624103 |
| cg08017326 | CXCL2                         | 0.000233422 | 0.41861304  |
| cg10453758 | UBA5;UBA5;ACAD11              | 7.23E-05    | 0.418609056 |
| cg09124223 | DPP6;DPP6                     | 1.50E-05    | 0.418595068 |
| cg24466241 | ZYG11A                        | 1.50E-05    | 0.41858885  |
| cg26813646 | SLC18A3;CHAT                  | 5.59E-05    | 0.41858163  |
| cg13558403 | NKX2-1;NKX2-1                 | 0.000290372 | 0.418550669 |
| cg12547166 | ZNF876P                       | 8.60E-06    | 0.418543336 |
| cg14899716 | RIMKLA                        | 0.000187194 | 0.418540913 |
| cg08358166 |                               | 0.000117986 | 0.418537249 |
| cg00266920 | ST8SIA3                       | 0.000290372 | 0.418528293 |
| cg14154651 | ESRP1;ESRP1;ESRP1;ESRP1;ESRP1 | 0.000654035 | 0.41850732  |
| cg22195627 |                               | 4.34E-05    | 0.418495068 |
| cg06232807 | SALL1;SALL1                   | 2.58E-05    | 0.418489522 |
| cg01276475 | RIMS1                         | 1.50E-05    | 0.418488833 |
| cg15585318 | WNT5A                         | 1.11E-05    | 0.418488575 |
| cg09515947 | CDH8;CDH8                     | 4.34E-05    | 0.418483948 |
| cg26322865 | LPPR2;LPPR2;LPPR2;LPPR2       | 5.59E-05    | 0.418474648 |
| cg15873301 | SYN2;SYN2                     | 5.59E-05    | 0.418468058 |
| cg21784383 | ESRRG                         | 2.58E-05    | 0.418444532 |
| cg06122635 |                               | 5.11E-05    | 0.418427896 |
| cg11005250 |                               | 8.60E-06    | 0.418417464 |
| cg04651781 |                               | 1.50E-05    | 0.41837535  |
| cg10300684 | FOXG1;FOXG1                   | 1.96E-05    | 0.418372022 |
| cg14507337 | SIX6                          | 0.000654035 | 0.418361207 |
| cg19132462 | AMPD3;AMPD3;AMPD3             | 4.34E-05    | 0.418357118 |
| cg07673230 | LAPTM4B                       | 1.50E-05    | 0.418348449 |
| cg00682263 | MEGF11                        | 0.001639597 | 0.418341713 |
| cg10059810 | PLEK2                         | 0.000187194 | 0.418339795 |
| cg23250574 |                               | 0.000233422 | 0.418311763 |
| cg12668482 | TRPA1;TRPA1                   | 8.60E-06    | 0.41831101  |
| cg03759346 |                               | 5.59E-05    | 0.418284726 |
| cg05618934 |                               | 5.59E-05    | 0.418256681 |
| cg16651347 | TNN                           | 5.59E-05    | 0.418240728 |

|            |                                       |             |             |
|------------|---------------------------------------|-------------|-------------|
| cg05588496 | DOK6                                  | 8.60E-06    | 0.418238741 |
| cg14175690 | TBX15                                 | 0.001639597 | 0.41823861  |
| cg20424531 |                                       | 2.58E-05    | 0.418184756 |
| cg05009934 | CLVS2                                 | 8.60E-06    | 0.418177225 |
| cg20091795 |                                       | 0.00043997  | 0.418176333 |
| cg13210467 | STAG3;GPC2                            | 2.58E-05    | 0.418172581 |
| cg19478500 | STL                                   | 0.00043997  | 0.418168069 |
| cg03473387 | GATA6                                 | 0.0050758   | 0.418161706 |
| cg11258164 | KCTD8                                 | 0.000233422 | 0.418161478 |
| cg14835443 |                                       | 3.34E-05    | 0.418132694 |
| cg22300957 | PHOX2B                                | 8.60E-06    | 0.418113477 |
| cg24830738 | KCNN2;KCNN2                           | 1.96E-05    | 0.418103721 |
| cg19952303 | SLC6A15;SLC6A15;SLC6A15;SLC6A15;SLC6A | 2.58E-05    | 0.418101319 |
| cg17080697 | TRIM39;TRIM39                         | 4.34E-05    | 0.418083232 |
| cg06222851 | OGDHL;OGDHL;OGDHL;OGDHL;OGDHL;OGD     | 8.60E-06    | 0.418068625 |
| cg24610231 |                                       | 1.11E-05    | 0.418068331 |
| cg11469098 | EFCAB1;EFCAB1;EFCAB1;EFCAB1;EFCAB1    | 3.34E-05    | 0.418005345 |
| cg18733974 | PHF21B;PHF21B                         | 1.11E-05    | 0.417972712 |
| cg24239329 | DCLK1                                 | 4.34E-05    | 0.417963397 |
| cg10118210 | FAM155A                               | 2.58E-05    | 0.417947631 |
| cg01757312 | SOX1                                  | 0.000357885 | 0.417935856 |
| cg00939735 | HELT                                  | 4.34E-05    | 0.417931691 |
| cg26463328 |                                       | 1.96E-05    | 0.417929915 |
| cg00083059 | MOCS1;MOCS1                           | 1.11E-05    | 0.417909534 |
| cg13600489 | NKX2-1;NKX2-1                         | 2.58E-05    | 0.417891622 |
| cg04784315 | GPR21;RABGAP1                         | 7.23E-05    | 0.417889585 |
| cg12615165 | GATA6                                 | 3.34E-05    | 0.417885919 |
| cg22127570 |                                       | 1.11E-05    | 0.41787185  |
| cg15508809 |                                       | 0.00043997  | 0.417846283 |
| cg24539234 | TPBG;TPBG                             | 0.0050758   | 0.417830054 |
| cg14944944 | UPK3A;UPK3A                           | 0.000290372 | 0.417808312 |
| cg15979173 | BARHL2                                | 1.50E-05    | 0.417805735 |
| cg10948929 | PTPRZ1                                | 2.58E-05    | 0.417800621 |
| cg24599434 | GHSR;GHSR                             | 8.60E-06    | 0.417791944 |
| cg24165638 | AZU1                                  | 2.58E-05    | 0.417770703 |
| cg10071824 | GSX1                                  | 0.000117986 | 0.417769429 |
| cg17537073 |                                       | 0.000537905 | 0.417764492 |
| cg15814717 |                                       | 1.50E-05    | 0.417757884 |
| cg06046431 | BDNF                                  | 3.34E-05    | 0.417742831 |
| cg19081101 | CHI3L1                                | 2.58E-05    | 0.417731857 |
| cg09186006 | SLC16A12;SLC16A12                     | 0.000357885 | 0.417730175 |
| cg13346411 | CCKBR                                 | 1.11E-05    | 0.417725552 |
| cg01759562 |                                       | 1.11E-05    | 0.417709208 |
| cg23480619 | KCNE1;KCNE1;KCNE1;KCNE1;KCNE1         | 1.96E-05    | 0.417705632 |
| cg17870270 | LCA5;LCA5                             | 0.000334462 | 0.417686726 |
| cg17953764 | ZAR1                                  | 8.60E-06    | 0.417668003 |
| cg19591056 | FMN2                                  | 7.23E-05    | 0.417655189 |
| cg05478291 | GOLSYN;GOLSYN;GOLSYN;GOLSYN;GOLSYN    | 0.000187194 | 0.417644397 |
| cg25793377 | RBP4                                  | 1.11E-05    | 0.417643138 |
| cg19629292 | FEZF2;FEZF2                           | 0.000148457 | 0.417612531 |
| cg22236250 |                                       | 2.58E-05    | 0.417570458 |
| cg25412831 | BDNF;BDNF;BDNF;BDNF;BDNF;BDNF;BDNF    | 0.000308169 | 0.417545285 |
| cg08628584 | SLC35F1                               | 1.50E-05    | 0.417543586 |
| cg11764900 |                                       | 1.96E-05    | 0.417532696 |
| cg10667895 |                                       | 1.50E-05    | 0.417468647 |
| cg03790804 | LOC348840                             | 0.000955793 | 0.41745918  |
| cg24501381 | CCDC30                                | 3.34E-05    | 0.417451903 |
| cg17188046 | T                                     | 1.50E-05    | 0.417420173 |
| cg18245660 | RGS20;RGS20;RGS20                     | 5.59E-05    | 0.417374356 |
| cg15964132 | OSBPL5;OSBPL5;OSBPL5                  | 1.96E-05    | 0.417369228 |

|            |                                           |             |             |
|------------|-------------------------------------------|-------------|-------------|
| cg22148695 | SMOC2;SMOC2                               | 2.58E-05    | 0.417367916 |
| cg16407471 | MIR129-2                                  | 8.60E-06    | 0.417349335 |
| cg22976224 | SIM2;SIM2                                 | 0.001376172 | 0.417320497 |
| cg26425256 |                                           | 2.58E-05    | 0.417315514 |
| cg25176746 | MYF6                                      | 1.11E-05    | 0.417269651 |
| cg06602847 | DBC1;DBC1                                 | 4.34E-05    | 0.417255702 |
| cg17295225 | OLIG3                                     | 8.60E-06    | 0.417246142 |
| cg22833612 | ASAP2;ASAP2                               | 3.92E-05    | 0.417241601 |
| cg14638883 | T                                         | 9.24E-05    | 0.417233795 |
| cg03625260 |                                           | 0.000187194 | 0.417219705 |
| cg02511156 | LOC283392;TRHDE;LOC283392                 | 4.34E-05    | 0.417215935 |
| cg10091335 |                                           | 4.34E-05    | 0.417214427 |
| cg03876032 | MYO3A                                     | 0.000187194 | 0.417189872 |
| cg16485975 |                                           | 5.59E-05    | 0.417185302 |
| cg25773344 | LRIG3;LRIG3;LRIG3                         | 1.50E-05    | 0.41715879  |
| cg06100973 | ELANE                                     | 7.23E-05    | 0.417157296 |
| cg04218812 |                                           | 5.59E-05    | 0.417122006 |
| cg11428482 | PHF21B;PHF21B                             | 7.23E-05    | 0.417111428 |
| cg11831238 | DBX1                                      | 2.58E-05    | 0.417063278 |
| cg20073686 | GRIA4;GRIA4;GRIA4;GRIA4                   | 9.24E-05    | 0.417047149 |
| cg03732087 | AGBL4                                     | 7.23E-05    | 0.417044484 |
| cg00333824 | CDH7;CDH7;CDH7                            | 8.60E-06    | 0.417007817 |
| cg24556441 | SYN3                                      | 1.50E-05    | 0.417002486 |
| cg13452317 | ARHGAP8;ARHGAP8;PRR5-ARHGAP8;ARHGAP8      | 7.23E-05    | 0.416978281 |
| cg26299169 | PDX1                                      | 3.34E-05    | 0.416935837 |
| cg20156659 | LHCGR;LHCGR                               | 8.60E-06    | 0.416925357 |
| cg02595760 |                                           | 2.58E-05    | 0.41692212  |
| cg02328332 | LHX5                                      | 5.59E-05    | 0.416916766 |
| cg13790603 | THRB;THRB;THRB                            | 0.000233422 | 0.416901798 |
| cg09130556 | CYP1B1                                    | 0.000955793 | 0.416878752 |
| cg20670075 | LHX5;LHX5                                 | 1.50E-05    | 0.416846279 |
| cg12065138 | AJAP1;AJAP1                               | 1.50E-05    | 0.416844916 |
| cg07070341 | PRDM5                                     | 2.58E-05    | 0.416832606 |
| cg04425920 |                                           | 0.000791389 | 0.416831495 |
| cg23289079 | PRDM6                                     | 2.80E-05    | 0.41682786  |
| cg02853355 | FAM92B                                    | 5.59E-05    | 0.416820316 |
| cg14558529 |                                           | 0.000290372 | 0.416801395 |
| cg26459372 | ADCY1                                     | 0.000233422 | 0.416780318 |
| cg11334771 | PHOX2A                                    | 4.34E-05    | 0.416757287 |
| cg07788369 | DLX6AS                                    | 4.34E-05    | 0.416744025 |
| cg16203203 | STL                                       | 0.001222233 | 0.416740408 |
| cg23244253 | SATB2                                     | 0.000233422 | 0.416715043 |
| cg00143045 | RPRM                                      | 1.96E-05    | 0.416696953 |
| cg15902390 | MEIS2;MEIS2;MEIS2;MEIS2;MEIS2;MEIS2;MEIS2 | 0.000187194 | 0.416678433 |
| cg22825487 | VNN3;VNN3                                 | 0.000117986 | 0.416678313 |
| cg08017858 | P4HA3                                     | 4.34E-05    | 0.416674175 |
| cg13604337 |                                           | 0.001147425 | 0.41658833  |
| cg14312063 | CADM2;CADM2                               | 0.000187194 | 0.416584427 |
| cg24013620 | MAPK15                                    | 7.23E-05    | 0.416573385 |
| cg07766263 | SLC7A14                                   | 2.80E-05    | 0.416548388 |
| cg26593946 | NR2F2                                     | 9.24E-05    | 0.416520844 |
| cg10305451 |                                           | 0.000117986 | 0.416518074 |
| cg05371578 | ZIC1                                      | 8.60E-06    | 0.416513979 |
| cg00481644 | LOC254559                                 | 1.50E-05    | 0.416467561 |
| cg08078694 |                                           | 9.24E-05    | 0.416467516 |
| cg04937080 | DAB1                                      | 2.80E-05    | 0.41646014  |
| cg05830425 |                                           | 0.000117986 | 0.416428406 |
| cg06551697 |                                           | 1.96E-05    | 0.416420194 |
| cg16955889 | SOX2OT                                    | 2.08E-05    | 0.416403604 |
| cg03229780 |                                           | 1.96E-05    | 0.416394359 |

|            |                                     |             |             |
|------------|-------------------------------------|-------------|-------------|
| cg16409955 | TRPC4;TRPC4;TRPC4;TRPC4;TRPC4;TRPC4 | 8.60E-06    | 0.416379254 |
| cg10320659 |                                     | 1.50E-05    | 0.416374551 |
| cg06588201 |                                     | 5.59E-05    | 0.416293454 |
| cg23845450 | LHX8                                | 1.11E-05    | 0.416282461 |
| cg00721315 | LHX5                                | 0.000117986 | 0.416281858 |
| cg25756066 | DDAH1;DDAH1                         | 0.000290372 | 0.416273491 |
| cg08604097 | NXPH1                               | 0.000357885 | 0.416270247 |
| cg21014159 | DSCAML1                             | 0.000117986 | 0.416266392 |
| cg20874785 | LOC100189589                        | 3.34E-05    | 0.416241712 |
| cg07892422 | HOXC13                              | 2.58E-05    | 0.416209954 |
| cg05620980 |                                     | 0.000290372 | 0.416205758 |
| cg12191293 | GLS2                                | 1.96E-05    | 0.416205384 |
| cg06523224 | BNC1                                | 9.24E-05    | 0.416190924 |
| cg16197925 | FEZF1;FEZF1                         | 2.58E-05    | 0.416166626 |
| cg05976481 |                                     | 2.58E-05    | 0.416163516 |
| cg07160277 | MARCH1                              | 1.96E-05    | 0.416134043 |
| cg25771113 |                                     | 0.001376172 | 0.416111774 |
| cg16896079 | PDZRN4                              | 0.000357885 | 0.416109945 |
| cg13323756 |                                     | 3.34E-05    | 0.416108746 |
| cg01345315 | ADAMTS20                            | 0.000148457 | 0.416096992 |
| cg26067203 | KIAA1751                            | 0.000357885 | 0.416069453 |
| cg17176573 | POU2F3                              | 0.000187194 | 0.416028182 |
| cg20041105 | LYNX1;LYNX1;LYNX1;LYNX1;LYNX1;LYNX1 | 0.000148457 | 0.416016792 |
| cg22823644 | HPSE2;HPSE2;HPSE2;HPSE2             | 0.000475639 | 0.415988756 |
| cg21180599 | TLE6;TLE6                           | 1.50E-05    | 0.415982321 |
| cg06787731 |                                     | 1.50E-05    | 0.415981592 |
| cg07379703 | ARSB;ARSB                           | 1.96E-05    | 0.415971377 |
| cg04986579 | UNC13A                              | 8.60E-06    | 0.415940478 |
| cg08244959 | IGSF21                              | 4.34E-05    | 0.415923437 |
| cg02227623 | CTNNA2;CTNNA2                       | 2.58E-05    | 0.415918776 |
| cg04560225 |                                     | 2.58E-05    | 0.415915203 |
| cg15680288 |                                     | 0.000955793 | 0.415901186 |
| cg06157334 | WNT6                                | 0.00043997  | 0.415820475 |
| cg26271891 | ZNF385B;MIR1258                     | 9.24E-05    | 0.415811533 |
| cg13834844 |                                     | 0.000148457 | 0.415795336 |
| cg20803857 | ST6GAL2;ST6GAL2;ST6GAL2             | 5.59E-05    | 0.41579505  |
| cg15469709 | C1orf161                            | 1.96E-05    | 0.415782649 |
| cg07055616 | NKX6-2                              | 8.60E-06    | 0.415759227 |
| cg26238041 | MTNR1A                              | 1.50E-05    | 0.415745759 |
| cg05102394 | EDNRA;EDNRA;EDNRA                   | 1.11E-05    | 0.41570482  |
| cg23641145 | PGR                                 | 2.58E-05    | 0.415703643 |
| cg16664584 |                                     | 5.59E-05    | 0.415700113 |
| cg16060486 | CYP1B1                              | 0.000187194 | 0.415694282 |
| cg06885823 |                                     | 0.000117986 | 0.415685607 |
| cg27626102 | STEAP2;STEAP2                       | 1.50E-05    | 0.415664518 |
| cg19380001 | DMRTA2                              | 2.58E-05    | 0.415653681 |
| cg20359994 |                                     | 1.11E-05    | 0.415614331 |
| cg01487187 | CCKBR                               | 1.96E-05    | 0.415607523 |
| cg13267264 | PRDM14                              | 0.000117986 | 0.415604881 |
| cg22160121 | ESYT3                               | 1.11E-05    | 0.415592463 |
| cg12058385 | ARHGAP15                            | 5.59E-05    | 0.415589997 |
| cg15368905 | HTR1B                               | 3.34E-05    | 0.415535704 |
| cg21854408 |                                     | 1.50E-05    | 0.415527102 |
| cg06479604 | GABRA1;GABRA1;GABRA1;GABRA1;GABRA1  | 1.50E-05    | 0.415486048 |
| cg02830749 | KIAA0922;KIAA0922                   | 0.000537905 | 0.415474501 |
| cg27315191 | SYT10                               | 8.60E-06    | 0.415471669 |
| cg20897830 |                                     | 4.34E-05    | 0.415464149 |
| cg10739095 | CLSTN2                              | 7.23E-05    | 0.415426026 |
| cg17454831 | MEIS1                               | 1.96E-05    | 0.415421209 |
| cg07625131 | USH1C;USH1C;USH1C;USH1C             | 1.96E-05    | 0.415417281 |

|            |                                 |             |             |
|------------|---------------------------------|-------------|-------------|
| cg27331524 | WNT2;WNT2;WNT2                  | 1.50E-05    | 0.415401507 |
| cg26989202 | C8orf47;C8orf47;C8orf47;C8orf47 | 0.000357885 | 0.415348363 |
| cg25670685 | NALCN                           | 0.000233422 | 0.415272696 |
| cg16924702 | EPB41L3                         | 0.000334462 | 0.415272076 |
| cg20482521 | SORCS3                          | 4.34E-05    | 0.415258814 |
| cg15404858 | NKX2-2                          | 1.11E-05    | 0.415250478 |
| cg22178238 | PTPRN2;PTPRN2;PTPRN2            | 2.58E-05    | 0.415213252 |
| cg04747180 | KLHL5;KLHL5;KLHL5;KLHL5         | 3.34E-05    | 0.415208711 |
| cg17152757 | GHSR;GHSR                       | 1.50E-05    | 0.415132462 |
| cg23934731 |                                 | 2.58E-05    | 0.415124215 |
| cg12930392 | PAK2                            | 3.34E-05    | 0.415113429 |
| cg05454562 | WDR46;WDR46                     | 1.50E-05    | 0.415089955 |
| cg07545317 |                                 | 1.50E-05    | 0.415082546 |
| cg07211972 | CBS                             | 3.34E-05    | 0.415065788 |
| cg24265969 | ERC2                            | 9.24E-05    | 0.41505938  |
| cg07570573 |                                 | 0.000187194 | 0.415058365 |
| cg24415208 | CACNG8                          | 7.23E-05    | 0.415053942 |
| cg19814981 |                                 | 1.96E-05    | 0.415053932 |
| cg17156803 |                                 | 1.11E-05    | 0.415049605 |
| cg20557595 |                                 | 8.60E-06    | 0.41504893  |
| cg17214381 | ZFP42                           | 0.000148457 | 0.415014071 |
| cg26885517 |                                 | 0.000117986 | 0.415002992 |
| cg03827337 | RGS7BP                          | 1.50E-05    | 0.414999811 |
| cg09393254 | MCHR2;MCHR2                     | 0.000187194 | 0.414970946 |
| cg03992259 | NCKAP5;NCKAP5                   | 1.11E-05    | 0.414962745 |
| cg23571812 | FOXG1                           | 3.34E-05    | 0.414946781 |
| cg26648818 | TOX3;TOX3                       | 8.60E-06    | 0.414923848 |
| cg22147660 |                                 | 2.58E-05    | 0.414905015 |
| cg07563793 | LHX8                            | 2.58E-05    | 0.414900653 |
| cg13449778 | FAM163A;FAM163A                 | 2.58E-05    | 0.414900405 |
| cg05933904 | SOX8                            | 0.000233422 | 0.414868728 |
| cg06743610 | FXYD1;FXYD1                     | 0.000148457 | 0.414866664 |
| cg13526469 |                                 | 0.000187194 | 0.414866339 |
| cg05667379 | DPP10;DPP10                     | 2.58E-05    | 0.414863848 |
| cg06759058 |                                 | 0.000148457 | 0.414863153 |
| cg19731044 |                                 | 5.59E-05    | 0.414859098 |
| cg08840010 | TNFRSF9                         | 5.59E-05    | 0.414829514 |
| cg18171240 | CDH2                            | 3.34E-05    | 0.414823859 |
| cg07465387 |                                 | 0.000290372 | 0.414813914 |
| cg19356191 |                                 | 0.000233422 | 0.414790661 |
| cg04617755 | DPP10;DPP10                     | 0.000187194 | 0.414788616 |
| cg19815904 | SEMA3C;SEMA3C                   | 9.24E-05    | 0.414787357 |
| cg24766821 |                                 | 1.96E-05    | 0.414785652 |
| cg20698769 | CTTNBP2                         | 8.60E-06    | 0.414765044 |
| cg02624770 | TRIL                            | 0.000122184 | 0.414758253 |
| cg17098147 | SPAG6;SPAG6                     | 1.50E-05    | 0.41474542  |
| cg06991300 | QRFPR                           | 1.96E-05    | 0.414743787 |
| cg22796353 |                                 | 2.58E-05    | 0.414715466 |
| cg07002201 | FUT9                            | 8.60E-06    | 0.414708964 |
| cg18559579 |                                 | 1.96E-05    | 0.41467708  |
| cg03775422 | VSTM2A;VSTM2A                   | 1.50E-05    | 0.414676838 |
| cg26980033 | WWC1;WWC1;WWC1                  | 0.000148457 | 0.41465183  |
| cg14768785 | GHSR;GHSR                       | 7.23E-05    | 0.414643795 |
| cg13400248 |                                 | 1.96E-05    | 0.414630524 |
| cg09648315 | MAST4;MAST4                     | 0.004131428 | 0.414617768 |
| cg25286482 | PDPN;PDPN                       | 0.000205664 | 0.414590575 |
| cg02081006 | PRDM6                           | 9.24E-05    | 0.414578427 |
| cg14560001 |                                 | 4.34E-05    | 0.414576204 |
| cg12209946 |                                 | 0.000117986 | 0.414563941 |
| cg04419610 | GRIN2D                          | 0.000233422 | 0.414548188 |

|            |                               |             |             |
|------------|-------------------------------|-------------|-------------|
| cg16174681 | FER                           | 7.23E-05    | 0.414527548 |
| cg03239552 | HOXC13                        | 0.000122184 | 0.414520885 |
| cg26959655 | UBR5                          | 1.96E-05    | 0.414518992 |
| cg12277666 | TDRD5                         | 1.96E-05    | 0.414512785 |
| cg15920867 | ERC2                          | 0.000290372 | 0.41445974  |
| cg05733181 |                               | 5.59E-05    | 0.414443555 |
| cg20950167 | LHX1                          | 8.60E-06    | 0.414419102 |
| cg05523911 | TCHH                          | 9.24E-05    | 0.414391722 |
| cg00956199 |                               | 5.59E-05    | 0.414391389 |
| cg00468146 | ID4                           | 0.000233422 | 0.414380689 |
| cg15509687 | GRP;GRP;GRP                   | 2.58E-05    | 0.414380255 |
| cg17231999 |                               | 0.00043997  | 0.41436774  |
| cg03444245 |                               | 4.34E-05    | 0.41436435  |
| cg06638827 | LRIG3;LRIG3                   | 8.60E-06    | 0.414360215 |
| cg14003035 | KIAA1755                      | 0.001887355 | 0.414354636 |
| cg25589001 | LCOR;LCOR;LCOR                | 1.50E-05    | 0.414352784 |
| cg16202564 | MATN2;MATN2                   | 1.50E-05    | 0.414323416 |
| cg04200224 | SCGN                          | 8.60E-06    | 0.414313354 |
| cg11022432 | ALDH1L1                       | 0.00043997  | 0.414279045 |
| cg20328736 | SCIN                          | 2.58E-05    | 0.414253345 |
| cg17892178 | GRM7;GRM7;GRM7;GRM7           | 9.24E-05    | 0.414248194 |
| cg15021439 | OBSL1                         | 1.11E-05    | 0.414241646 |
| cg10828337 | FOXG1;FOXG1                   | 3.34E-05    | 0.414241024 |
| cg01839464 | DCC                           | 8.60E-06    | 0.414193742 |
| cg00773459 | TTLL7;TTLL7                   | 2.58E-05    | 0.414187936 |
| cg03384992 | OSBPL1A;OSBPL1A               | 0.001061731 | 0.41417523  |
| cg07602980 |                               | 0.00043997  | 0.41415417  |
| cg08244848 | EGLN3                         | 0.006823935 | 0.414122797 |
| cg01800521 |                               | 3.34E-05    | 0.414085709 |
| cg01926877 |                               | 9.24E-05    | 0.414077525 |
| cg10763234 |                               | 0.00043997  | 0.414058846 |
| cg14120010 | CDH7;CDH7                     | 8.60E-06    | 0.414057668 |
| cg10206397 | STK35                         | 9.24E-05    | 0.414037293 |
| cg11896633 | FAM83H                        | 4.34E-05    | 0.414017048 |
| cg13689681 | CDC14B;CDC14B                 | 8.60E-06    | 0.413958684 |
| cg03468072 |                               | 5.59E-05    | 0.413942835 |
| cg07098902 | VSNL1                         | 0.000187194 | 0.413932848 |
| cg14655855 |                               | 1.50E-05    | 0.413837044 |
| cg00809988 | ELAVL2;ELAVL2;ELAVL2          | 4.34E-05    | 0.413827189 |
| cg21540437 | GABRA2;GABRA2                 | 1.11E-05    | 0.413818787 |
| cg10767665 | KCNN4                         | 8.60E-06    | 0.413815333 |
| cg04460771 |                               | 0.000148457 | 0.413719971 |
| cg19595234 | TOX2;TOX2;TOX2                | 0.000654035 | 0.413699947 |
| cg05020625 | TTBK1                         | 3.34E-05    | 0.413688844 |
| cg23893898 |                               | 1.96E-05    | 0.413663864 |
| cg03032214 | GALR1                         | 8.60E-06    | 0.413663587 |
| cg26249873 | LOC100128811;GPR158           | 8.60E-06    | 0.413663491 |
| cg16300637 |                               | 2.80E-05    | 0.413650018 |
| cg18028999 | C15orf26                      | 1.96E-05    | 0.413627308 |
| cg26101277 | CCL1                          | 8.60E-06    | 0.413623592 |
| cg10453230 |                               | 0.000117986 | 0.41361047  |
| cg12506971 | AADAT;AADAT                   | 2.58E-05    | 0.413605032 |
| cg10794058 | ALX1                          | 5.59E-05    | 0.413595498 |
| cg12488187 | MSRB3;MSRB3                   | 0.000654035 | 0.41358981  |
| cg03709938 | MMEL1                         | 8.60E-06    | 0.413576071 |
| cg21949333 | PID1;PID1                     | 0.000357885 | 0.413574422 |
| cg24924779 | KCNG1                         | 0.000357885 | 0.413570552 |
| cg15965134 |                               | 8.60E-06    | 0.413568766 |
| cg10108237 | ESRRG;ESRRG;ESRRG;ESRRG;ESRRG | 1.96E-05    | 0.413567258 |
| cg14401466 |                               | 8.60E-06    | 0.413560464 |



|            |                                       |             |             |
|------------|---------------------------------------|-------------|-------------|
| cg04949225 |                                       | 3.34E-05    | 0.413553147 |
| cg24366557 | TFAP2B                                | 8.60E-06    | 0.413504208 |
| cg06547386 | MPPED2                                | 0.000117986 | 0.413492845 |
| cg06365535 | TBX4                                  | 5.59E-05    | 0.413477274 |
| cg26665224 | SLC6A15;SLC6A15;SLC6A15               | 0.000117986 | 0.413462905 |
| cg21998983 | GALNT13                               | 1.11E-05    | 0.413459057 |
| cg16059957 |                                       | 0.000233422 | 0.413453608 |
| cg03344031 | MYH14;MYH14;MYH14                     | 9.24E-05    | 0.413450936 |
| cg03413097 |                                       | 1.50E-05    | 0.413420445 |
| cg02928916 | HTR1E;HTR1E                           | 5.59E-05    | 0.413381826 |
| cg00509610 | TSEN2;TSEN2;TSEN2;TSEN2;TSEN2         | 5.59E-05    | 0.413375944 |
| cg09450020 | STEAP2;STEAP2                         | 1.50E-05    | 0.413370739 |
| cg25806808 | CXCL1                                 | 1.11E-05    | 0.413356674 |
| cg14323675 |                                       | 1.50E-05    | 0.413346008 |
| cg04157138 |                                       | 8.60E-06    | 0.413335275 |
| cg19239040 |                                       | 2.58E-05    | 0.413323816 |
| cg26967100 |                                       | 0.000117986 | 0.413265437 |
| cg05012825 | PVR;PVR;PVR;PVR                       | 1.96E-05    | 0.41324137  |
| cg08718490 | SPATA18                               | 0.000117986 | 0.413226812 |
| cg05486872 | MYOM1;MYOM1                           | 7.23E-05    | 0.413215849 |
| cg21537214 | REN                                   | 0.000187194 | 0.413207795 |
| cg21842274 | CRHBP                                 | 4.34E-05    | 0.413198415 |
| cg12076463 | NKX6-1                                | 4.34E-05    | 0.413196673 |
| cg25757598 | RALYL;RALYL;RALYL;RALYL;RALYL         | 2.58E-05    | 0.413195189 |
| cg25740565 | FLJ32063                              | 7.23E-05    | 0.413181869 |
| cg12995800 | GLRA1;GLRA1;GLRA1;GLRA1               | 3.34E-05    | 0.413179711 |
| cg21186708 |                                       | 1.50E-05    | 0.413141914 |
| cg15092343 | MSX1                                  | 7.23E-05    | 0.413127987 |
| cg21623566 | DCC                                   | 8.60E-06    | 0.413069204 |
| cg13920435 | CDK20;CDK20;CDK20;CDK20;CDK20;CDK20;C | 0.000187194 | 0.413063265 |
| cg25911468 | GLRB;GLRB;GLRB                        | 2.58E-05    | 0.413049478 |
| cg15688396 | LSAMP;LSAMP                           | 8.60E-06    | 0.413015011 |
| cg18721420 | CCDC105                               | 2.58E-05    | 0.412983242 |
| cg24750614 | FAM123C;FAM123C;FAM123C;FAM123C       | 9.24E-05    | 0.412956889 |
| cg26170604 | NXPH1                                 | 7.23E-05    | 0.412932769 |
| cg16396907 |                                       | 3.34E-05    | 0.412913226 |
| cg10959353 | SPHKAP;SPHKAP                         | 5.59E-05    | 0.412883836 |
| cg14953590 | VGLL2;VGLL2                           | 8.60E-06    | 0.412879489 |
| cg27596495 | HCRTR2;HCRTR2                         | 1.11E-05    | 0.412874768 |
| cg14334298 | MOGAT1;MOGAT1                         | 3.34E-05    | 0.41286353  |
| cg11630154 | SOX14;SOX14                           | 1.96E-05    | 0.412807743 |
| cg03012544 | NEFM;NEFM                             | 9.24E-05    | 0.412794853 |
| cg23489137 | RBMS1;RBMS1                           | 0.000117986 | 0.412787925 |
| cg21093192 |                                       | 1.50E-05    | 0.412754399 |
| cg17333109 | NKX2-8                                | 1.50E-05    | 0.412752876 |
| cg06695611 | ZNF385B;MIR1258                       | 0.000955793 | 0.412750604 |
| cg21299542 | PITX2;PITX2                           | 8.60E-06    | 0.41274937  |
| cg23037403 | ZNF454                                | 1.96E-05    | 0.412740697 |
| cg08521987 | SLC18A2                               | 0.000290372 | 0.412740626 |
| cg00481951 | SST                                   | 8.60E-06    | 0.412706455 |
| cg08620474 | CYP1B1                                | 0.00043997  | 0.41268499  |
| cg25012577 | ADAR                                  | 8.60E-06    | 0.412661317 |
| cg08992911 | MLPH;MLPH                             | 2.58E-05    | 0.412647596 |
| cg09053680 | UTF1                                  | 0.000357885 | 0.412617492 |
| cg19867649 | DKK3;DKK3;DKK3;DKK3                   | 5.59E-05    | 0.41260121  |
| cg18237551 | ZNF300                                | 0.000791389 | 0.412591324 |
| cg20981848 | BTBD3;BTBD3                           | 0.001376172 | 0.412563138 |
| cg26129353 | ATP8B1                                | 3.34E-05    | 0.412556141 |
| cg22418909 | SFRP1;SFRP1                           | 8.60E-06    | 0.412554965 |
| cg19851909 | GPR83                                 | 0.000117986 | 0.412550665 |

|            |                          |             |             |
|------------|--------------------------|-------------|-------------|
| cg18447772 | HOXA9                    | 1.96E-05    | 0.412543632 |
| cg06654956 |                          | 9.24E-05    | 0.412542392 |
| cg16822174 | AEBP2;AEBP2              | 1.11E-05    | 0.412540706 |
| cg13424673 | AGBL4                    | 1.11E-05    | 0.412539389 |
| cg22837767 | PAX1                     | 2.58E-05    | 0.41253326  |
| cg00859441 | PLBD2;PLBD2              | 0.000187194 | 0.412531472 |
| cg09805405 | PKIB;PKIB;PKIB           | 1.50E-05    | 0.41248072  |
| cg06526020 | NUDT3                    | 0.000233422 | 0.412471741 |
| cg17508300 | HPSE2;HPSE2;HPSE2;HPSE2  | 0.000357885 | 0.412464653 |
| cg02002583 |                          | 3.34E-05    | 0.412444105 |
| cg23168531 |                          | 3.34E-05    | 0.412444092 |
| cg12790391 | C11orf70                 | 7.23E-05    | 0.412441899 |
| cg13234863 | TMEM132D                 | 1.11E-05    | 0.412441304 |
| cg26646867 |                          | 0.000233422 | 0.412426151 |
| cg26344227 |                          | 0.000117986 | 0.412385226 |
| cg08458292 | DAB1                     | 0.000117986 | 0.412303857 |
| cg11580493 | NR2F2;NR2F2              | 3.34E-05    | 0.412300237 |
| cg26457809 | KCNQ1DN                  | 8.60E-06    | 0.412294147 |
| cg26254792 | HOOK1                    | 8.60E-06    | 0.412288957 |
| cg16852588 | ZNF365;ZNF365;ZNF365     | 3.34E-05    | 0.412282031 |
| cg02582387 | FAM43B                   | 0.000148457 | 0.412274691 |
| cg08076830 |                          | 1.50E-05    | 0.412272982 |
| cg12426652 | CLDN14;CLDN14            | 0.000654035 | 0.412256262 |
| cg16104584 | SLC2A5                   | 0.000148457 | 0.41224719  |
| cg25199552 | KDM1A;KDM1A              | 1.50E-05    | 0.412183221 |
| cg08199953 | SALL1;SALL1              | 5.59E-05    | 0.412180502 |
| cg08110488 |                          | 0.000187194 | 0.412157166 |
| cg03403065 | PTPRT;PTPRT              | 0.000148457 | 0.412149848 |
| cg01692233 |                          | 1.11E-05    | 0.412130522 |
| cg26114043 |                          | 1.50E-05    | 0.41211892  |
| cg21013866 | EFS;EFS                  | 9.24E-05    | 0.412116434 |
| cg05372753 |                          | 1.96E-05    | 0.412106213 |
| cg07665387 | PCDH10;PCDH10            | 1.50E-05    | 0.4120924   |
| cg07380496 | MAP1B                    | 0.000117986 | 0.412091141 |
| cg10846615 |                          | 0.001135306 | 0.412087383 |
| cg01822050 |                          | 1.11E-05    | 0.412068451 |
| cg08739233 | SHISA4;SHISA4;SHISA4     | 0.000233422 | 0.41206751  |
| cg21851351 | GSX1                     | 0.000187194 | 0.412061548 |
| cg25615585 | MAPK4                    | 0.000537905 | 0.412058458 |
| cg11836119 | ZNF876P                  | 1.50E-05    | 0.412019335 |
| cg03406844 | TNFAIP6                  | 3.34E-05    | 0.411993567 |
| cg09236284 | TAC1;TAC1;TAC1;TAC1      | 7.23E-05    | 0.411990605 |
| cg21902544 | CBLN2;CBLN2              | 0.000187194 | 0.411984578 |
| cg21024826 | MNX1;MNX1                | 2.58E-05    | 0.411980709 |
| cg23097402 | DMRTA2                   | 0.000357885 | 0.411967182 |
| cg02579959 | FLJ42289;FLJ42289        | 5.59E-05    | 0.411960771 |
| cg09371439 | ADAMTSL3                 | 8.60E-06    | 0.411956804 |
| cg14361409 |                          | 2.58E-05    | 0.411948237 |
| cg15558882 |                          | 1.11E-05    | 0.411946244 |
| cg02844545 | GCM2;GCM2                | 5.59E-05    | 0.411940349 |
| cg16263887 |                          | 9.24E-05    | 0.411931732 |
| cg08812189 | ZIC4;ZIC4;ZIC4;ZIC4;ZIC4 | 1.96E-05    | 0.411931327 |
| cg08943714 | HECA                     | 0.000654035 | 0.411900946 |
| cg14614901 | TMEM215                  | 3.34E-05    | 0.411898903 |
| cg18567924 |                          | 0.000233422 | 0.411897408 |
| cg20248516 | EN1                      | 1.50E-05    | 0.411880341 |
| cg16882450 |                          | 2.58E-05    | 0.411876356 |
| cg12212453 |                          | 2.58E-05    | 0.41185053  |
| cg07944863 | RGS7                     | 8.60E-06    | 0.411850311 |
| cg16536329 | ZNF454                   | 7.23E-05    | 0.411848886 |

|            |                                       |             |             |
|------------|---------------------------------------|-------------|-------------|
| cg09147985 | LRRC4C;LRRC4C                         | 1.50E-05    | 0.411801478 |
| cg23208513 | RGS22                                 | 8.60E-06    | 0.411798063 |
| cg05204798 | MPPED2;MPPED2                         | 0.00043997  | 0.411779129 |
| cg02115911 |                                       | 1.50E-05    | 0.411778581 |
| cg05221057 |                                       | 0.000290372 | 0.411770121 |
| cg27649239 | LBXCOR1                               | 0.000187194 | 0.411766376 |
| cg22640233 | OPCML                                 | 3.34E-05    | 0.411750182 |
| cg17143696 |                                       | 0.000955793 | 0.411733286 |
| cg13427728 |                                       | 2.58E-05    | 0.411714143 |
| cg03022510 |                                       | 3.34E-05    | 0.411696626 |
| cg01064265 | IRX6                                  | 1.96E-05    | 0.411686416 |
| cg26729217 |                                       | 9.24E-05    | 0.411674565 |
| cg27546977 |                                       | 5.59E-05    | 0.411663211 |
| cg23889730 | PRIMA1                                | 8.60E-06    | 0.411656299 |
| cg20122727 | BTC                                   | 0.000117986 | 0.411648201 |
| cg19064258 | HS3ST2                                | 8.60E-06    | 0.411644742 |
| cg19047868 | LOC404266;HOXB5;LOC404266;LOC404266;L | 0.000117986 | 0.411619394 |
| cg01236132 | SOX1;SOX1                             | 4.34E-05    | 0.411609777 |
| cg06146698 |                                       | 5.59E-05    | 0.411594379 |
| cg11505338 | KDR                                   | 7.23E-05    | 0.411554587 |
| cg18618429 | CSTA                                  | 0.00043997  | 0.411491127 |
| cg09650880 |                                       | 8.60E-06    | 0.411473753 |
| cg26673012 | TBX20;TBX20                           | 1.96E-05    | 0.411464809 |
| cg09671258 | LHX4                                  | 9.24E-05    | 0.411415366 |
| cg16406225 |                                       | 8.60E-06    | 0.41139742  |
| cg07103129 | TFAP2B                                | 1.50E-05    | 0.411381438 |
| cg11850773 | ADCYAP1;ADCYAP1;ADCYAP1               | 1.50E-05    | 0.411379792 |
| cg01110759 | MT1A                                  | 0.000117986 | 0.411368594 |
| cg22339356 | NXPH1                                 | 3.34E-05    | 0.411351751 |
| cg00413617 | KCNC1;KCNC1                           | 8.60E-06    | 0.411321926 |
| cg25953239 | HOXD10                                | 7.23E-05    | 0.411307967 |
| cg16142306 | UCHL1;UCHL1                           | 8.60E-06    | 0.411292542 |
| cg26717554 | ELANE                                 | 4.34E-05    | 0.411290374 |
| cg17347634 | CYP7B1                                | 0.000148457 | 0.411286514 |
| cg07410872 | HAND2;NBLA00301                       | 0.000187194 | 0.411285067 |
| cg14156751 |                                       | 1.50E-05    | 0.411284222 |
| cg08232264 | FAM164A                               | 0.000117986 | 0.411263133 |
| cg13935962 | HAND2;NBLA00301                       | 0.000187194 | 0.411246438 |
| cg01729717 | SLITRK1;SLITRK1                       | 7.23E-05    | 0.411233239 |
| cg04037038 | FRZB                                  | 0.002714607 | 0.411221802 |
| cg23850899 | LRRC4C;LRRC4C                         | 1.50E-05    | 0.411211642 |
| cg02938303 | CDCP1;CDCP1                           | 0.002714607 | 0.411202332 |
| cg13165109 | TDH                                   | 5.59E-05    | 0.411193594 |
| cg27279991 | AP3B2                                 | 1.96E-05    | 0.411192785 |
| cg26625518 |                                       | 9.24E-05    | 0.411183467 |
| cg06883126 |                                       | 0.000537905 | 0.411177431 |
| cg14834285 |                                       | 4.34E-05    | 0.411126257 |
| cg15272362 | VSX1;VSX1                             | 3.34E-05    | 0.411115967 |
| cg07315010 | MAP1LC3C                              | 3.34E-05    | 0.411097608 |
| cg14007757 |                                       | 1.60E-05    | 0.411063307 |
| cg20596329 |                                       | 4.34E-05    | 0.411061613 |
| cg12106728 |                                       | 3.34E-05    | 0.411061361 |
| cg02367133 |                                       | 2.58E-05    | 0.411061092 |
| cg27044841 |                                       | 8.60E-06    | 0.411057204 |
| cg19712746 | KDR                                   | 1.11E-05    | 0.411048906 |
| cg02620694 | GABRA2;GABRA2                         | 1.11E-05    | 0.411033529 |
| cg02168303 |                                       | 0.000117986 | 0.411001953 |
| cg26235748 | FLRT2                                 | 0.000537905 | 0.410981156 |
| cg14900814 | LGI2                                  | 0.000290372 | 0.410968512 |
| cg04690482 | FAM83B                                | 4.34E-05    | 0.410928677 |

|            |                                    |             |             |
|------------|------------------------------------|-------------|-------------|
| cg03724990 | TBX18                              | 1.50E-05    | 0.41090886  |
| cg20405017 | CA10;CA10;CA10;CA10                | 2.58E-05    | 0.410892898 |
| cg12510028 | CALCR;CALCR                        | 4.34E-05    | 0.410891783 |
| cg15261499 |                                    | 1.96E-05    | 0.410882769 |
| cg24603464 | MLPH;MLPH                          | 8.60E-06    | 0.410869955 |
| cg09467433 |                                    | 0.000357885 | 0.410863992 |
| cg22040469 | MYOD1                              | 0.000117986 | 0.41084858  |
| cg10318510 | PRKD1                              | 0.000187194 | 0.410831005 |
| cg04834204 | ANTXR1                             | 5.59E-05    | 0.410765088 |
| cg16247183 |                                    | 0.001147425 | 0.410731479 |
| cg11283860 |                                    | 3.34E-05    | 0.410731413 |
| cg13995774 | MAML1                              | 5.59E-05    | 0.410705447 |
| cg04304802 | CDH23                              | 9.24E-05    | 0.410700348 |
| cg25600606 | HIPK3;HIPK3                        | 1.96E-05    | 0.410697085 |
| cg03475665 | HHIPL1;HHIPL1                      | 0.000537905 | 0.410689403 |
| cg21187352 | GRM7;GRM7                          | 4.34E-05    | 0.410679487 |
| cg22178798 |                                    | 5.59E-05    | 0.410672854 |
| cg01105058 | NALCN                              | 4.34E-05    | 0.41065488  |
| cg03156546 | TNRC6A                             | 0.000148457 | 0.410620066 |
| cg21159568 | CHST12                             | 0.007873393 | 0.410609429 |
| cg01142710 |                                    | 1.96E-05    | 0.410592749 |
| cg08806408 | SALL1;SALL1                        | 0.000955793 | 0.410588064 |
| cg00589371 | CDH7;CDH7                          | 1.96E-05    | 0.410587271 |
| cg24133115 | PDE10A;PDE10A;PDE10A;PDE10A        | 1.11E-05    | 0.410542454 |
| cg00851770 | CIDEA;CIDEA                        | 0.000187194 | 0.410533007 |
| cg10966582 | MST1P9                             | 1.11E-05    | 0.410520798 |
| cg21062931 | DHCR24                             | 2.58E-05    | 0.410494441 |
| cg08458487 | SFTPD                              | 0.000117986 | 0.410481677 |
| cg04698114 | SALL1;SALL1;SALL1                  | 0.001948248 | 0.410471095 |
| cg18881684 |                                    | 0.000148457 | 0.410460537 |
| cg18739950 |                                    | 0.000290372 | 0.410442068 |
| cg10126205 | TWIST1                             | 0.000357885 | 0.410415411 |
| cg01166925 |                                    | 1.96E-05    | 0.410402633 |
| cg06498267 | HCN1                               | 2.58E-05    | 0.410380563 |
| cg11663667 |                                    | 1.96E-05    | 0.410370183 |
| cg14003416 |                                    | 8.60E-06    | 0.410362679 |
| cg05293994 | CADPS2;CADPS2;CADPS2               | 0.000223017 | 0.410328408 |
| cg14425564 | LHX2                               | 9.24E-05    | 0.410326184 |
| cg19681956 | RAB32                              | 0.000117986 | 0.410320614 |
| cg01920657 | DNAJC6                             | 7.23E-05    | 0.410296282 |
| cg06793562 |                                    | 8.60E-06    | 0.410294668 |
| cg23811789 | LOC642597                          | 3.34E-05    | 0.410282945 |
| cg24553417 | EBPL                               | 2.58E-05    | 0.410278589 |
| cg13016179 | PLSCR4;PLSCR4;PLSCR4;PLSCR4;PLSCR4 | 9.24E-05    | 0.41027728  |
| cg04273811 | STAC                               | 0.000117986 | 0.41023975  |
| cg25037730 |                                    | 1.11E-05    | 0.410230163 |
| cg26597242 | GABRA1;GABRA1;GABRA1;GABRA1;GABRA1 | 1.11E-05    | 0.410230034 |
| cg12424785 | GALNT13                            | 8.60E-06    | 0.410228044 |
| cg17918227 | CADM1;CADM1                        | 1.50E-05    | 0.410221426 |
| cg05125795 | LPHN2                              | 4.34E-05    | 0.410215198 |
| cg10752406 | AZU1                               | 2.58E-05    | 0.410207885 |
| cg24395452 | SPATA18                            | 1.50E-05    | 0.410187623 |
| cg12685846 | TJP1;TJP1                          | 1.96E-05    | 0.410174566 |
| cg16764494 | DSCAML1                            | 0.000290372 | 0.410161289 |
| cg25734490 | ASCL1                              | 9.24E-05    | 0.410118314 |
| cg22830113 |                                    | 0.001147425 | 0.410115273 |
| cg10827893 | PROX1                              | 0.000955793 | 0.410081377 |
| cg20449685 | ZSCAN1                             | 2.58E-05    | 0.410072014 |
| cg27076454 | AGAP1;AGAP1                        | 0.00043997  | 0.41006914  |
| cg18507018 | TMEM55A                            | 0.000117986 | 0.410063242 |

|            |                                         |             |             |
|------------|-----------------------------------------|-------------|-------------|
| cg02694427 | HOXD12                                  | 0.000233422 | 0.410042114 |
| cg00625334 | C18orf34;C18orf34                       | 1.50E-05    | 0.410036309 |
| cg10972973 |                                         | 0.000187194 | 0.410022445 |
| cg27414655 | PRDM5                                   | 5.59E-05    | 0.410002333 |
| cg20674577 | PHACTR3                                 | 8.60E-06    | 0.409993216 |
| cg24996179 |                                         | 5.59E-05    | 0.409991004 |
| cg02273398 |                                         | 7.23E-05    | 0.409990019 |
| cg16494192 | SLC18A3;SLC18A3;CHAT                    | 1.96E-05    | 0.409979825 |
| cg06202228 |                                         | 8.60E-06    | 0.409978585 |
| cg19942495 | ACCN1                                   | 2.58E-05    | 0.409977176 |
| cg21384492 | SNED1                                   | 9.24E-05    | 0.409975887 |
| cg09051775 | TOX3;TOX3                               | 0.000233422 | 0.409965873 |
| cg00149947 |                                         | 0.000148457 | 0.409950048 |
| cg11842610 | GFRA1;GFRA1                             | 0.000187194 | 0.409940251 |
| cg16157435 | NPAS2                                   | 2.58E-05    | 0.409919173 |
| cg10358533 | CHST8;CHST8                             | 5.59E-05    | 0.409908858 |
| cg19174211 | SASH1                                   | 2.58E-05    | 0.409904519 |
| cg22892110 | MAPK15                                  | 8.60E-06    | 0.409864901 |
| cg20505223 | SCTR;SCTR                               | 4.34E-05    | 0.409844478 |
| cg11849717 | EGFR;EGFR;EGFR;EGFR                     | 7.23E-05    | 0.409841724 |
| cg22826333 | CWH43                                   | 8.60E-06    | 0.409840984 |
| cg02013838 |                                         | 9.24E-05    | 0.409838158 |
| cg01178680 | ISLR2;ISLR2;ISLR2;ISLR2                 | 0.000187194 | 0.40983517  |
| cg06829830 | RASGRF2                                 | 0.000233422 | 0.409817976 |
| cg21466150 | RFX6                                    | 2.58E-05    | 0.409779949 |
| cg02541778 |                                         | 1.96E-05    | 0.409777061 |
| cg17264240 | PDLIM3;PDLIM3                           | 1.11E-05    | 0.409736346 |
| cg21657955 | TMEM196                                 | 4.34E-05    | 0.409690009 |
| cg09454925 | KCNH7;KCNH7                             | 8.60E-06    | 0.409680984 |
| cg20099830 | TBX5;TBX5;TBX5;TBX5                     | 1.50E-05    | 0.409654902 |
| cg06829686 |                                         | 0.00043997  | 0.409646853 |
| cg20930366 | KCNN2                                   | 0.000334462 | 0.409645211 |
| cg21874829 |                                         | 0.000233422 | 0.409634734 |
| cg05195067 | PAX2;PAX2;PAX2;PAX2;PAX2                | 0.000187194 | 0.409626728 |
| cg03306221 | SULT4A1                                 | 1.50E-05    | 0.409624713 |
| cg11935021 | COL25A1;COL25A1;COL25A1;COL25A1         | 8.60E-06    | 0.4096244   |
| cg01971160 | LHX8                                    | 8.60E-06    | 0.409619507 |
| cg10972897 | UCK2                                    | 7.23E-05    | 0.409614086 |
| cg18525486 | FEZF2                                   | 2.58E-05    | 0.409582628 |
| cg19453938 |                                         | 5.59E-05    | 0.409565179 |
| cg23715830 |                                         | 5.59E-05    | 0.40956328  |
| cg02530022 | DLX6AS                                  | 3.34E-05    | 0.409557119 |
| cg23442672 |                                         | 1.96E-05    | 0.409547526 |
| cg10193817 | CADM1;CADM1;CADM1;CADM1                 | 8.60E-06    | 0.409530027 |
| cg00880018 | TNFSF11;TNFSF11                         | 0.000537905 | 0.409525421 |
| cg10943458 | STXBP5L;STXBP5L                         | 0.000187194 | 0.40951414  |
| cg17619311 | ZNF662;ZNF662;ZNF662                    | 4.34E-05    | 0.409505844 |
| cg13734972 | DOCK5                                   | 1.11E-05    | 0.409469614 |
| cg00340958 | B4GALT5                                 | 3.34E-05    | 0.409444012 |
| cg06945523 | SFTA3                                   | 0.000357885 | 0.409431638 |
| cg18319029 | ADCYAP1;ADCYAP1                         | 0.000117986 | 0.409400193 |
| cg23559689 | GRIA4;GRIA4;GRIA4;GRIA4                 | 0.000117986 | 0.409395857 |
| cg25184481 | TMEM196                                 | 5.59E-05    | 0.409373791 |
| cg19494588 | PPP2R2B;PPP2R2B;PPP2R2B;PPP2R2B;PPP2R2B | 5.59E-05    | 0.409353755 |
| cg15503722 | BSX                                     | 1.50E-05    | 0.409346833 |
| cg14228146 |                                         | 7.23E-05    | 0.409345149 |
| cg10157715 |                                         | 8.60E-06    | 0.409339136 |
| cg08154963 | RAD51L3;RAD51L3;RAD51L3                 | 1.50E-05    | 0.409322117 |
| cg06567373 |                                         | 5.59E-05    | 0.409306154 |
| cg04961582 |                                         | 0.000148457 | 0.40929965  |

|            |                                        |             |             |
|------------|----------------------------------------|-------------|-------------|
| cg14626309 |                                        | 4.34E-05    | 0.409277906 |
| cg02315940 | CLSTN2                                 | 5.59E-05    | 0.409239464 |
| cg06763054 | MTMR7;MTMR7                            | 1.50E-05    | 0.409226211 |
| cg08990926 | CNTN1;CNTN1;CNTN1;CNTN1                | 3.34E-05    | 0.40921165  |
| cg17256532 | GFRA1;GFRA1;GFRA1                      | 0.000955793 | 0.409202567 |
| cg09892426 |                                        | 0.000117986 | 0.409194349 |
| cg04914562 | INADL                                  | 0.000148457 | 0.409184345 |
| cg25578609 | WSCD1                                  | 0.000357885 | 0.40918212  |
| cg18777119 | VSTM2B                                 | 0.000187194 | 0.409172339 |
| cg22727581 | NEFL                                   | 5.59E-05    | 0.409169579 |
| cg08495770 | SORCS3                                 | 1.11E-05    | 0.409168365 |
| cg04908380 |                                        | 4.34E-05    | 0.409167531 |
| cg25739938 | CPSF3                                  | 1.50E-05    | 0.409162664 |
| cg04878955 | RSPO1;RSPO1                            | 0.000187194 | 0.409155977 |
| cg10880928 | C9orf86;C9orf86                        | 1.11E-05    | 0.409144625 |
| cg00995854 | CD5L                                   | 0.000290372 | 0.409130451 |
| cg20357628 | PHACTR3;PHACTR3                        | 7.23E-05    | 0.409125213 |
| cg25895948 | ALPK3                                  | 0.000233422 | 0.4091116   |
| cg12843518 | STOX2                                  | 4.34E-05    | 0.409101516 |
| cg06739029 | ID4                                    | 9.24E-05    | 0.409092308 |
| cg14488905 | NRG1;NRG1;NRG1;NRG1;NRG1;NRG1;NRG1;    | 0.000148457 | 0.409082506 |
| cg04946561 | ARRDC5                                 | 8.60E-06    | 0.40905651  |
| cg00912625 | CNTN4                                  | 8.60E-06    | 0.409010476 |
| cg22460896 |                                        | 0.000233422 | 0.40900967  |
| cg12391690 | RSPO1                                  | 7.23E-05    | 0.40898794  |
| cg14059339 | TRIM27                                 | 7.23E-05    | 0.408976433 |
| cg03930088 |                                        | 0.000791389 | 0.408975496 |
| cg03699623 |                                        | 1.50E-05    | 0.408956451 |
| cg07583894 | RTBDN;RTBDN                            | 7.23E-05    | 0.408930221 |
| cg13563725 |                                        | 8.60E-06    | 0.408927556 |
| cg02893823 | KRT19;KRT19                            | 5.11E-05    | 0.408905473 |
| cg00374016 |                                        | 7.23E-05    | 0.408905351 |
| cg18020065 | RASA3                                  | 0.002304201 | 0.408894731 |
| cg22327646 |                                        | 1.11E-05    | 0.408891548 |
| cg02869649 | PHF21B;PHF21B                          | 4.34E-05    | 0.408885051 |
| cg15414833 | RUNDC3B;RUNDC3B;RUNDC3B;ABCB1;RUNDC3B; | 0.000187194 | 0.408881681 |
| cg06545268 |                                        | 0.000233422 | 0.408874212 |
| cg27635267 | PAMR1;PAMR1                            | 8.60E-06    | 0.408862881 |
| cg11301556 | SLC12A5;SLC12A5                        | 7.23E-05    | 0.408818532 |
| cg00626856 |                                        | 7.23E-05    | 0.408809651 |
| cg19923650 | NKX2-5;NKX2-5;NKX2-5                   | 9.24E-05    | 0.408784318 |
| cg08141424 | PDZRN3                                 | 8.60E-06    | 0.408772834 |
| cg23363202 | ANKRD20B                               | 8.60E-06    | 0.40876995  |
| cg14564076 | DPP6                                   | 8.60E-06    | 0.408766935 |
| cg06641153 | ST8SIA3                                | 1.11E-05    | 0.408753751 |
| cg04711050 | SLC1A1                                 | 3.34E-05    | 0.408746937 |
| cg20611680 |                                        | 8.60E-06    | 0.408739861 |
| cg03437186 | ADCY1                                  | 5.59E-05    | 0.408739652 |
| cg16633951 | LOC84856                               | 1.96E-05    | 0.408727185 |
| cg19623438 |                                        | 0.000290372 | 0.408711523 |
| cg02564291 | PRDM6                                  | 8.60E-06    | 0.408707124 |
| cg24693053 | MFSD7                                  | 4.34E-05    | 0.408700387 |
| cg17412248 | CDH22                                  | 1.11E-05    | 0.408689952 |
| cg04274288 |                                        | 8.60E-06    | 0.408688644 |
| cg21923525 | RALBP1                                 | 8.60E-06    | 0.40868845  |
| cg08276289 |                                        | 0.000233422 | 0.408682441 |
| cg16284459 | MTERF                                  | 0.005897668 | 0.408680163 |
| cg04132917 | RORA                                   | 0.000290372 | 0.408668852 |
| cg02344527 |                                        | 0.000654035 | 0.408649988 |
| cg15969227 |                                        | 3.34E-05    | 0.408637087 |

|            |                                          |             |             |
|------------|------------------------------------------|-------------|-------------|
| cg27540865 |                                          | 5.59E-05    | 0.408616908 |
| cg20801476 | EVX1                                     | 5.59E-05    | 0.408607752 |
| cg05655534 |                                          | 1.11E-05    | 0.408575186 |
| cg24537383 | ROR1;ROR1                                | 0.000290372 | 0.408569973 |
| cg24513433 | LIPG                                     | 0.000117986 | 0.408552188 |
| cg21745612 | TMEM132E;C17orf102                       | 4.34E-05    | 0.40854758  |
| cg24630419 | ESRRG                                    | 3.34E-05    | 0.408529299 |
| cg17519645 | NCRNA00085                               | 0.001147425 | 0.408486992 |
| cg01154966 | TRPC4AP;TRPC4AP                          | 0.00043997  | 0.408478652 |
| cg04553690 | PCDHGA4;PCDHGA6;PCDHGA1;PCDHGA8;PCDHGA10 | 1.96E-05    | 0.408471011 |
| cg25023275 | BRUNOL4;BRUNOL4;BRUNOL4;BRUNOL4          | 4.34E-05    | 0.408465519 |
| cg17436134 |                                          | 5.59E-05    | 0.408458227 |
| cg12754421 | GRIA4;GRIA4;GRIA4;GRIA4                  | 5.59E-05    | 0.408450136 |
| cg27294268 | SFTA3                                    | 1.11E-05    | 0.408449449 |
| cg02515601 | GLRA1;GLRA1                              | 8.60E-06    | 0.408441518 |
| cg01447112 |                                          | 4.34E-05    | 0.408436845 |
| cg06465076 | CAST;CAST;CAST;CAST;CAST                 | 1.50E-05    | 0.408434971 |
| cg16596102 | FAM78B                                   | 7.23E-05    | 0.408431877 |
| cg11391335 | TBX15                                    | 8.60E-06    | 0.408413498 |
| cg16662477 | RFFL                                     | 5.11E-05    | 0.408373017 |
| cg06951245 | PTH2R                                    | 8.60E-06    | 0.408318827 |
| cg17477445 | DPY19L2                                  | 2.58E-05    | 0.408317429 |
| cg04359129 | PSD;FBXL15                               | 7.23E-05    | 0.408311233 |
| cg13561879 | UNC5D                                    | 5.59E-05    | 0.408284916 |
| cg05876738 | CALCR;CALCR                              | 2.58E-05    | 0.408273514 |
| cg16502747 | ACIN1;ACIN1;ACIN1;ACIN1;ACIN1            | 3.34E-05    | 0.408266868 |
| cg03160135 | VGLL2;VGLL2;VGLL2;VGLL2                  | 8.60E-06    | 0.408252865 |
| cg24771121 | KDELC1;BIVM;KDELC1;BIVM                  | 4.34E-05    | 0.408231898 |
| cg16526416 |                                          | 0.000233422 | 0.408228413 |
| cg04759648 |                                          | 1.11E-05    | 0.408220532 |
| cg02631468 | VSX1;VSX1                                | 0.000148457 | 0.408218835 |
| cg21784917 | MAGI2                                    | 8.60E-06    | 0.408208544 |
| cg03355524 | CBLN4                                    | 5.59E-05    | 0.408168258 |
| cg01561869 | PCDHGA2;PCDHGA3;PCDHGA3;PCDHGA1          | 1.50E-05    | 0.408157249 |
| cg11576590 |                                          | 0.000290372 | 0.408157122 |
| cg22279027 | PLA2R1;PLA2R1;PLA2R1;PLA2R1              | 0.000290372 | 0.408147298 |
| cg06713632 | KCNA7;KCNA7                              | 5.59E-05    | 0.40809871  |
| cg12988534 | COBL;COBL                                | 0.000148457 | 0.408089185 |
| cg08214995 | HS3ST2                                   | 8.60E-06    | 0.408085599 |
| cg14058647 |                                          | 4.34E-05    | 0.408085071 |
| cg24302235 | SLC2A2                                   | 2.58E-05    | 0.408074569 |
| cg16277479 | PDPN;PDPN                                | 7.23E-05    | 0.408063658 |
| cg07072722 | NTM;NTM;NTM;NTM;NTM;NTM;NTM              | 3.34E-05    | 0.408056272 |
| cg11763509 | BMP8A                                    | 3.34E-05    | 0.408038525 |
| cg15089219 | C1QL2                                    | 1.11E-05    | 0.40803232  |
| cg03217173 |                                          | 0.000187194 | 0.408011464 |
| cg13288164 | PCDHB4                                   | 1.96E-05    | 0.408008637 |
| cg01114937 | TBX18                                    | 1.96E-05    | 0.408000608 |
| cg19050990 |                                          | 8.60E-06    | 0.407999422 |
| cg23679344 | MED1                                     | 7.23E-05    | 0.407997519 |
| cg01050010 | MYO1D                                    | 0.000117986 | 0.407945801 |
| cg03760951 | INS-IGF2;IGF2AS;IGF2;IGF2;IGF2AS;IGF2    | 0.000205664 | 0.407923163 |
| cg21303011 | THRB;THRB;THRB                           | 0.000357885 | 0.407915397 |
| cg14733048 | RSPO2;RSPO2                              | 3.34E-05    | 0.407885219 |
| cg18144593 |                                          | 0.000233422 | 0.407875472 |
| cg22945605 | ARHGEF10L                                | 5.59E-05    | 0.407816996 |
| cg01477971 | TMEM182                                  | 0.000357885 | 0.407813846 |
| cg25319067 |                                          | 5.59E-05    | 0.407794156 |
| cg10820926 | PRKD1                                    | 2.58E-05    | 0.407772418 |
| cg03667047 | KL                                       | 7.23E-05    | 0.407767894 |

|            |                                         |             |             |
|------------|-----------------------------------------|-------------|-------------|
| cg03159124 | LAMA1                                   | 0.000148457 | 0.407754584 |
| cg16925459 | HDAC9;HDAC9;HDAC9;HDAC9;HDAC9           | 2.58E-05    | 0.407725295 |
| cg10237419 | COL25A1;COL25A1                         | 1.96E-05    | 0.407719882 |
| cg01352175 |                                         | 1.11E-05    | 0.407718449 |
| cg04085025 | SCRN1;SCRN1;SCRN1;SCRN1                 | 0.000357885 | 0.407717793 |
| cg18400281 | KIAA1217;KIAA1217;KIAA1217              | 0.000290372 | 0.40771412  |
| cg13307880 | PCDHGA4;PCDHGA2;PCDHGA5;PCDHGB2;PCDHGB1 | 8.60E-06    | 0.40769468  |
| cg10162019 |                                         | 3.34E-05    | 0.407684633 |
| cg07393736 |                                         | 0.000117986 | 0.407678656 |
| cg05903736 | HDAC4                                   | 2.58E-05    | 0.40761003  |
| cg19063061 | SLC17A7                                 | 0.000537905 | 0.407605105 |
| cg14971895 | GPR158;LOC100128811                     | 1.96E-05    | 0.407600278 |
| cg09179211 | FAM3B;FAM3B                             | 5.59E-05    | 0.407578748 |
| cg06219793 | BHLHE22                                 | 8.60E-06    | 0.407563755 |
| cg02345961 | BRUNOL4;BRUNOL4;BRUNOL4;BRUNOL4         | 8.60E-06    | 0.407531488 |
| cg19827223 |                                         | 1.50E-05    | 0.407519365 |
| cg02279108 |                                         | 1.96E-05    | 0.407491822 |
| cg00506629 | PLOD2;PLOD2                             | 1.96E-05    | 0.407485858 |
| cg08393041 | ZIC4;ZIC4;ZIC4;ZIC4;ZIC4                | 1.11E-05    | 0.407484357 |
| cg09354241 |                                         | 0.000117986 | 0.407476582 |
| cg07708622 |                                         | 0.000357885 | 0.407470485 |
| cg13511000 | ATOH1                                   | 1.50E-05    | 0.407469924 |
| cg18920097 | GJD2                                    | 9.24E-05    | 0.407466146 |
| cg00124695 | SALL1;SALL1                             | 0.00041966  | 0.407460651 |
| cg13010502 | FAM123C;FAM123C;FAM123C;FAM123C         | 8.60E-06    | 0.407453048 |
| cg06616729 |                                         | 0.000955793 | 0.407434959 |
| cg25842602 | BRUNOL4;BRUNOL4;BRUNOL4;BRUNOL4         | 8.60E-06    | 0.407433361 |
| cg19304150 | SYT6;SYT6                               | 9.24E-05    | 0.407409223 |
| cg03128890 |                                         | 4.34E-05    | 0.407407291 |
| cg04837832 |                                         | 0.000654035 | 0.407387261 |
| cg07739205 | SNTG1                                   | 0.000148457 | 0.407386926 |
| cg15645638 | TMEM74                                  | 0.000262362 | 0.407372247 |
| cg02319986 | PRAM1                                   | 4.34E-05    | 0.407371928 |
| cg08845123 | KANK4                                   | 1.96E-05    | 0.407362141 |
| cg19831575 | FGF4;FGF4                               | 5.59E-05    | 0.407333834 |
| cg00610583 | CXCL1                                   | 4.34E-05    | 0.407333737 |
| cg17673897 | TFAP2A                                  | 9.24E-05    | 0.407326976 |
| cg10362591 | SLC6A2                                  | 1.11E-05    | 0.407324879 |
| cg17424999 | SLC6A5                                  | 4.34E-05    | 0.407324125 |
| cg07147449 |                                         | 9.24E-05    | 0.407316807 |
| cg08004425 | GRIK3                                   | 0.000357885 | 0.407308634 |
| cg05384102 | SNAP91;SNAP91                           | 0.002040485 | 0.40729854  |
| cg15069295 |                                         | 1.50E-05    | 0.407292869 |
| cg09253179 |                                         | 4.34E-05    | 0.407292026 |
| cg24813038 |                                         | 7.23E-05    | 0.407288105 |
| cg21448057 | SLITRK1                                 | 1.50E-05    | 0.407284105 |
| cg03637218 | AP3S1                                   | 6.94E-05    | 0.407269369 |
| cg16563230 | AJAP1;AJAP1                             | 0.000955793 | 0.407247473 |
| cg26105956 | SHE                                     | 0.000117986 | 0.407240122 |
| cg19968403 | MIR548G;COL8A1;COL8A1                   | 5.59E-05    | 0.407232583 |
| cg00874051 |                                         | 0.000357885 | 0.407220621 |
| cg03207054 | CADPS;CADPS;CADPS                       | 7.23E-05    | 0.407199398 |
| cg23004758 |                                         | 0.000654035 | 0.407161405 |
| cg06281795 | CALB1                                   | 0.000117986 | 0.407148004 |
| cg10131657 | PKHD1L1                                 | 0.000117986 | 0.407107655 |
| cg04266202 | MPO                                     | 4.34E-05    | 0.407107067 |
| cg24524470 | EFCAB2;EFCAB2;EFCAB2                    | 0.000526175 | 0.407095642 |
| cg12771118 | MRAS;MRAS                               | 5.59E-05    | 0.407065775 |
| cg17344770 | C19orf71                                | 2.58E-05    | 0.407053837 |
| cg21328033 | CA10;CA10;CA10;CA10                     | 1.96E-05    | 0.407033982 |



|            |                                    |             |             |
|------------|------------------------------------|-------------|-------------|
| cg07147033 | MIB2;MIB2;MIB2;MIB2;MIB2           | 0.000233422 | 0.407006825 |
| cg26258273 | ESYT3;ESYT3                        | 0.000233422 | 0.406975546 |
| cg10640845 | ONECUT3                            | 2.58E-05    | 0.406972094 |
| cg03203223 | RELN;RELN                          | 0.000148457 | 0.406940673 |
| cg00666763 | MAPKAP1;MAPKAP1;MAPKAP1;MAPKAP1;MA | 0.000290372 | 0.406898047 |
| cg15861196 |                                    | 2.58E-05    | 0.406874673 |
| cg20764887 | COL23A1                            | 0.00043997  | 0.406865944 |
| cg19594305 | CHST8;CHST8;CHST8;CHST8            | 5.59E-05    | 0.406864801 |
| cg02087954 |                                    | 2.58E-05    | 0.406829583 |
| cg26385172 |                                    | 8.60E-06    | 0.406825567 |
| cg08058191 | KRT17                              | 4.34E-05    | 0.40678515  |
| cg03111498 | VSX1;VSX1                          | 1.11E-05    | 0.406779492 |
| cg22972989 | VSTM2A                             | 0.000290372 | 0.406763581 |
| cg04467618 | TCF21;TCF21                        | 9.24E-05    | 0.40676097  |
| cg20523393 |                                    | 0.000290372 | 0.406760863 |
| cg12204732 | DOCK1;FAM196A                      | 3.34E-05    | 0.406747524 |
| cg11118422 |                                    | 1.11E-05    | 0.406726209 |
| cg07108441 | SORBS2;SORBS2;SORBS2;SORBS2;SORBS2 | 4.34E-05    | 0.406716776 |
| cg07298177 |                                    | 1.11E-05    | 0.406702464 |
| cg16101346 | PTGS2                              | 0.000357885 | 0.40669718  |
| cg26333652 | IRX2;IRX2                          | 0.000148457 | 0.406637406 |
| cg14169521 | ARL4A;ARL4A;ARL4A                  | 0.009066563 | 0.406625397 |
| cg07356342 | NDUFS2;NDUFS2;FCER1G               | 1.96E-05    | 0.40662397  |
| cg06710937 |                                    | 4.34E-05    | 0.40661276  |
| cg15957055 | CADPS;CADPS;CADPS;CADPS;CADPS;CADP | 0.000654035 | 0.406609743 |
| cg07065111 |                                    | 0.007873393 | 0.406584606 |
| cg08238215 | MEIS1                              | 1.50E-05    | 0.406583434 |
| cg01851088 | CELSR3;CELSR3                      | 0.001147425 | 0.406577338 |
| cg16240162 | ZIC4;ZIC4;ZIC4;ZIC4;ZIC4           | 0.000117986 | 0.406570862 |
| cg04988476 | FGF12                              | 1.50E-05    | 0.406551673 |
| cg02561482 | TFAP2B                             | 1.11E-05    | 0.406548783 |
| cg13413955 | DMRT1                              | 5.59E-05    | 0.406537395 |
| cg12339328 | SEC23B;SEC23B;SEC23B               | 1.96E-05    | 0.406537091 |
| cg23095584 | GBX2                               | 1.11E-05    | 0.406529377 |
| cg27113059 | LIPG                               | 0.000148457 | 0.406518479 |
| cg17741839 | PCDHA6;PCDHA2;PCDHA1;PCDHA10;PCDHA | 1.50E-05    | 0.406518374 |
| cg26267388 |                                    | 3.34E-05    | 0.406500268 |
| cg00272971 |                                    | 2.58E-05    | 0.406480519 |
| cg11880727 | KCNH5;KCNH5;KCNH5                  | 1.11E-05    | 0.406478958 |
| cg03717836 |                                    | 8.60E-06    | 0.406474592 |
| cg18947175 | HRNBP3                             | 2.58E-05    | 0.40646413  |
| cg02458945 | MMP2;MMP2                          | 9.24E-05    | 0.40645852  |
| cg20785796 | SATB2                              | 9.24E-05    | 0.406431653 |
| cg16043651 | ZNF536                             | 0.000233422 | 0.406412507 |
| cg21893651 | NCRNA00171                         | 0.000290372 | 0.40639615  |
| cg15531512 |                                    | 0.000117986 | 0.406378216 |
| cg00637104 |                                    | 0.000187194 | 0.406360292 |
| cg15119027 | FGF3                               | 0.000117986 | 0.406356926 |
| cg02547269 | FOXF2                              | 1.96E-05    | 0.406294372 |
| cg14701491 |                                    | 0.00043997  | 0.406283117 |
| cg08259514 |                                    | 0.000290372 | 0.406283113 |
| cg12758687 | DRD2;DRD2                          | 1.96E-05    | 0.406254742 |
| cg01946042 |                                    | 1.11E-05    | 0.406236366 |
| cg24154951 |                                    | 3.34E-05    | 0.406213825 |
| cg12704157 |                                    | 0.000117986 | 0.406208952 |
| cg10179911 |                                    | 5.59E-05    | 0.40619453  |
| cg01946451 |                                    | 8.60E-06    | 0.406191526 |
| cg12075445 | GALNT9                             | 0.00043997  | 0.406184499 |
| cg16377881 | PRDM13                             | 4.34E-05    | 0.406178353 |
| cg02699167 | FBXL2                              | 0.000187194 | 0.406174036 |

|            |                                     |             |             |
|------------|-------------------------------------|-------------|-------------|
| cg24715245 | UCHL1                               | 7.23E-05    | 0.406148552 |
| cg18511526 | FLJ44817;FLJ44817                   | 5.59E-05    | 0.406139975 |
| cg03207439 | C20orf103                           | 0.000791389 | 0.406104238 |
| cg12173558 |                                     | 3.34E-05    | 0.406089197 |
| cg06529756 | SV2C                                | 7.23E-05    | 0.406082699 |
| cg12174804 |                                     | 0.000187194 | 0.406081928 |
| cg08979319 | SIM1                                | 1.96E-05    | 0.406055313 |
| cg07272264 |                                     | 4.34E-05    | 0.406054044 |
| cg17974166 |                                     | 7.23E-05    | 0.40604102  |
| cg18789958 | HCN1                                | 0.000117986 | 0.40602162  |
| cg27271486 | DKFZP434H168;GNAO1;GNAO1            | 0.000117986 | 0.406005873 |
| cg18510056 | C10orf41;C10orf41                   | 7.23E-05    | 0.406001381 |
| cg05501357 | HIPK3;HIPK3                         | 1.11E-05    | 0.405986302 |
| cg13121699 | ZNF804A                             | 1.50E-05    | 0.405983378 |
| cg24331598 |                                     | 0.000187194 | 0.405975249 |
| cg16420199 | LPL                                 | 3.34E-05    | 0.40597062  |
| cg23291280 |                                     | 2.58E-05    | 0.405964591 |
| cg15377283 | SOX17                               | 3.34E-05    | 0.405963154 |
| cg20540714 | TFAP2A;TFAP2A                       | 5.59E-05    | 0.405946825 |
| cg24680602 | ZNF232;ZNF232                       | 8.60E-06    | 0.405943204 |
| cg03427905 | ADAMTS9                             | 0.000290372 | 0.405939255 |
| cg05106294 | DKK3;DKK3;DKK3                      | 0.000262362 | 0.405899145 |
| cg22400420 | RGL1                                | 1.50E-05    | 0.405898144 |
| cg20257553 | PLA2R1;PLA2R1                       | 0.000117986 | 0.405892123 |
| cg02935904 | TTC22;TTC22                         | 3.34E-05    | 0.405879501 |
| cg10585648 | CCT3;C1orf182;C1orf182;CCT3;CCT3    | 0.000537905 | 0.405867816 |
| cg15835339 | SFTA1P                              | 3.34E-05    | 0.405860121 |
| cg03326762 | LHX8                                | 3.34E-05    | 0.405832899 |
| cg06757399 | HAGH;FAHD1;FAHD1;FAHD1;HAGH;FAHD1   | 0.000955793 | 0.405800513 |
| cg16785912 | PKP2;PKP2                           | 1.50E-05    | 0.405773096 |
| cg03870777 | KRT18;KRT18                         | 9.24E-05    | 0.405762455 |
| cg09306214 | TACR1;TACR1                         | 9.24E-05    | 0.405753723 |
| cg16573328 | ZNF804A;ZNF804A                     | 3.92E-05    | 0.405743487 |
| cg22941573 | TMEM189;TMEM189-UBE2V1;TMEM189;TMEM | 0.000117986 | 0.405742025 |
| cg06994692 | LOC389458                           | 0.000290372 | 0.405729963 |
| cg24085946 | NFASC;NFASC;NFASC;NFASC;NFASC;NFASC | 8.60E-06    | 0.405728532 |
| cg26269881 | BHLHE40                             | 0.000537905 | 0.405724064 |
| cg20593611 | FIGN                                | 0.000791389 | 0.40571729  |
| cg08734647 | C16orf73;C16orf73                   | 1.96E-05    | 0.405711125 |
| cg17934871 | C13orf36                            | 0.000117986 | 0.405705385 |
| cg15174623 |                                     | 1.11E-05    | 0.405702986 |
| cg14144025 |                                     | 8.60E-06    | 0.405700088 |
| cg26355577 | CTNNA2;CTNNA2;LRRTM1                | 8.60E-06    | 0.405696166 |
| cg04334723 | CALR                                | 5.59E-05    | 0.405683772 |
| cg18267049 |                                     | 7.23E-05    | 0.405678416 |
| cg09619271 | IGFBP3;IGFBP3                       | 0.000955793 | 0.405661348 |
| cg07770968 | NPBWR1                              | 0.000187194 | 0.405660864 |
| cg14629075 | VGLL3                               | 7.23E-05    | 0.40565045  |
| cg00767010 |                                     | 0.000654035 | 0.405624153 |
| cg15831060 |                                     | 0.000955793 | 0.405618207 |
| cg06401579 |                                     | 9.24E-05    | 0.405569207 |
| cg01521397 | TAF4                                | 0.000290372 | 0.405559068 |
| cg09205920 |                                     | 8.60E-06    | 0.40555841  |
| cg14674720 |                                     | 1.96E-05    | 0.405557531 |
| cg23424407 |                                     | 3.34E-05    | 0.405554007 |
| cg18158990 | SYT10                               | 8.60E-06    | 0.405548333 |
| cg26855918 |                                     | 1.96E-05    | 0.405531277 |
| cg11569159 |                                     | 1.50E-05    | 0.405482626 |
| cg22685409 | KCNA4                               | 3.34E-05    | 0.405466795 |
| cg08651937 | PA2G4P4                             | 7.23E-05    | 0.405457459 |

|            |                                      |             |             |
|------------|--------------------------------------|-------------|-------------|
| cg00336700 |                                      | 0.000117986 | 0.405433905 |
| cg13186884 |                                      | 8.60E-06    | 0.405420276 |
| cg10011091 | SLC25A32                             | 0.000117986 | 0.405410146 |
| cg16291880 |                                      | 1.50E-05    | 0.405393631 |
| cg08898253 | UPK3A;UPK3A                          | 0.000290372 | 0.405384814 |
| cg27375198 | PYY                                  | 4.34E-05    | 0.405375051 |
| cg03293015 | MATN2;MATN2;MATN2;MATN2              | 3.34E-05    | 0.405374604 |
| cg07479670 | NID1                                 | 0.00043997  | 0.405373897 |
| cg25757820 |                                      | 3.34E-05    | 0.405365678 |
| cg00810956 |                                      | 0.000187194 | 0.405332683 |
| cg00089091 | DPP10;DPP10                          | 0.000187194 | 0.405321456 |
| cg20433822 | C10orf88                             | 8.60E-06    | 0.405306394 |
| cg01255414 | FGF12;FGF12                          | 8.60E-06    | 0.405270146 |
| cg14301932 |                                      | 1.50E-05    | 0.405245435 |
| cg13079571 | TRIM39;TRIM39                        | 1.96E-05    | 0.405230985 |
| cg23062198 | FAM84A                               | 1.11E-05    | 0.405215143 |
| cg14508508 | GABRA5;GABRA5                        | 8.60E-06    | 0.405208855 |
| cg26817755 |                                      | 7.23E-05    | 0.405207224 |
| cg02159402 | GALNT11                              | 9.24E-05    | 0.405180991 |
| cg04362858 |                                      | 9.24E-05    | 0.405179587 |
| cg15402529 |                                      | 7.23E-05    | 0.405159821 |
| cg02093732 |                                      | 8.60E-06    | 0.405157661 |
| cg21432954 | TRPC4;TRPC4;TRPC4;TRPC4;TRPC4;TRPC4; | 8.60E-06    | 0.405144526 |
| cg05076914 | SMOC2;SMOC2                          | 3.34E-05    | 0.405142974 |
| cg15732768 | DLX5                                 | 2.58E-05    | 0.405125635 |
| cg13019491 | SIX6                                 | 0.000233422 | 0.405123407 |
| cg01786704 | SNRPN;SNRPN;SNRPN;SNRPN              | 0.000137134 | 0.4050887   |
| cg21810188 | VCAN;VCAN;VCAN;VCAN                  | 0.000290372 | 0.405081242 |
| cg16397794 | MKX                                  | 0.00043997  | 0.405057906 |
| cg13960084 | CACNA1B                              | 4.34E-05    | 0.405046371 |
| cg23990723 | BIVM;BIVM;KDEL1;BIVM;BIVM            | 0.000187194 | 0.405035845 |
| cg04027548 | KCNJ8                                | 8.60E-06    | 0.405009834 |
| cg22337128 | C14orf23;C14orf23                    | 2.58E-05    | 0.404979391 |
| cg22930445 | SLC25A21;SLC25A21;LOC100129794       | 1.96E-05    | 0.404959073 |
| cg08165796 |                                      | 0.000290372 | 0.404958596 |
| cg02226645 | MIR124-2                             | 1.96E-05    | 0.404883962 |
| cg04365452 |                                      | 8.60E-06    | 0.404873607 |
| cg19772399 | IGSF9B                               | 5.59E-05    | 0.404867967 |
| cg00593536 | NXPH2                                | 1.50E-05    | 0.404847265 |
| cg10905495 | EBF2                                 | 7.23E-05    | 0.404828939 |
| cg03988540 |                                      | 5.59E-05    | 0.404798448 |
| cg05712610 | GALNT11                              | 4.34E-05    | 0.404777528 |
| cg00364016 |                                      | 1.11E-05    | 0.40476825  |
| cg16123202 |                                      | 2.58E-05    | 0.404761913 |
| cg02925039 | ADAMTS20                             | 8.60E-06    | 0.404760574 |
| cg08231870 |                                      | 0.000955793 | 0.404757888 |
| cg05962092 | KCNA7                                | 1.11E-05    | 0.404727667 |
| cg02584498 | GREB1                                | 2.58E-05    | 0.40472673  |
| cg05336115 | RSPO4;RSPO4                          | 3.34E-05    | 0.404726224 |
| cg16624482 | UMODL1;UMODL1                        | 7.23E-05    | 0.404724576 |
| cg09949949 | RELN;RELN                            | 1.50E-05    | 0.404704543 |
| cg08185661 | SYT9                                 | 2.58E-05    | 0.404701657 |
| cg10157251 |                                      | 1.11E-05    | 0.404691894 |
| cg20954870 |                                      | 4.34E-05    | 0.404661018 |
| cg04917181 | TSPYL5                               | 0.000955793 | 0.404654686 |
| cg26104143 |                                      | 9.24E-05    | 0.404648795 |
| cg24822696 | STL                                  | 0.006823935 | 0.404626769 |
| cg15590989 | MGC45800                             | 1.50E-05    | 0.404617309 |
| cg06829299 |                                      | 1.96E-05    | 0.404614756 |
| cg08864105 | DENND2D                              | 0.000290372 | 0.404610432 |

|            |                                    |             |             |
|------------|------------------------------------|-------------|-------------|
| cg09861917 | FOXA2                              | 9.24E-05    | 0.404538749 |
| cg00495775 | HOXD11                             | 1.11E-05    | 0.404535556 |
| cg04426311 | LRRN1                              | 0.000117986 | 0.404489118 |
| cg02500300 | STOX2;STOX2                        | 3.34E-05    | 0.404479257 |
| cg18557131 | ZIC5                               | 0.000117986 | 0.404447176 |
| cg14179581 |                                    | 1.96E-05    | 0.404440566 |
| cg17391928 | SLC27A6;SLC27A6;SLC27A6;SLC27A6    | 4.34E-05    | 0.404412917 |
| cg05763228 | LRAT                               | 1.11E-05    | 0.404411849 |
| cg19480724 | EVX1                               | 0.001147425 | 0.404396831 |
| cg23049291 | LMX1A                              | 1.96E-05    | 0.404382622 |
| cg26150071 | CSMD2                              | 7.23E-05    | 0.404370463 |
| cg00831222 |                                    | 3.34E-05    | 0.404344678 |
| cg08843809 | FBXO39                             | 0.000187194 | 0.404336514 |
| cg23122109 | SLC19A3;SLC19A3                    | 1.50E-05    | 0.404324679 |
| cg18872497 |                                    | 8.60E-06    | 0.404293585 |
| cg10590857 | ADCY2                              | 0.000233422 | 0.404293411 |
| cg00321480 |                                    | 1.50E-05    | 0.404289343 |
| cg14545970 | CDC14B;CDC14B;CDC14B;CDC14B        | 0.000148457 | 0.404264107 |
| cg04927931 | SIM1                               | 0.001948248 | 0.404221552 |
| cg01879591 |                                    | 1.11E-05    | 0.404202582 |
| cg05864140 | RESP18                             | 3.34E-05    | 0.404193757 |
| cg07940072 | FOXA1                              | 7.23E-05    | 0.404165283 |
| cg23359394 | DOK5                               | 0.000791389 | 0.404138342 |
| cg07653946 | GREB1L                             | 8.60E-06    | 0.404119855 |
| cg25023298 |                                    | 5.59E-05    | 0.404118218 |
| cg00405190 | WIPF1                              | 9.24E-05    | 0.404108174 |
| cg16052975 |                                    | 1.96E-05    | 0.40410128  |
| cg08712932 | EYA4;EYA4;EYA4                     | 0.000187194 | 0.404096023 |
| cg09577841 | KLHL31                             | 0.000537905 | 0.404095959 |
| cg27037551 | CCBE1                              | 1.96E-05    | 0.404084594 |
| cg08671647 | PCDH7;PCDH7;PCDH7                  | 1.11E-05    | 0.404081162 |
| cg11727383 | LBX1;FLJ41350                      | 4.34E-05    | 0.404048486 |
| cg13574488 | EMX2;EMX2                          | 1.50E-05    | 0.404046006 |
| cg21725954 | GRM1;GRM1;GRM1;GRM1                | 1.50E-05    | 0.404037513 |
| cg10639888 | RPRM                               | 0.000117986 | 0.404037339 |
| cg11480800 | PYGO1                              | 8.60E-06    | 0.404022709 |
| cg19904058 | LOC619207                          | 1.11E-05    | 0.404019119 |
| cg09871685 |                                    | 1.50E-05    | 0.403988619 |
| cg03227021 |                                    | 3.08E-05    | 0.403988508 |
| cg13770399 | PTP4A1                             | 3.92E-05    | 0.403988223 |
| cg19611809 | ONECUT1                            | 1.18E-05    | 0.403984495 |
| cg15194943 | ADCYAP1;ADCYAP1                    | 1.50E-05    | 0.403975098 |
| cg03031234 | EXOC6                              | 9.24E-05    | 0.403970328 |
| cg15060366 | PCSK2                              | 2.58E-05    | 0.403927055 |
| cg16739441 | KCNJ8                              | 1.96E-05    | 0.403925103 |
| cg05619587 | SLC6A15;SLC6A15;SLC6A15            | 1.11E-05    | 0.403920509 |
| cg17386057 |                                    | 2.58E-05    | 0.403920458 |
| cg12974637 | CCDC68;CCDC68;CCDC68               | 2.58E-05    | 0.403915785 |
| cg13486410 | C4orf31                            | 2.58E-05    | 0.403905399 |
| cg03976877 | VIPR2;VIPR2                        | 0.001639597 | 0.403904661 |
| cg26006870 |                                    | 4.34E-05    | 0.403899472 |
| cg08288811 | PCDHA2;PCDHA1;PCDHA3;PCDHA3;PCDHA1 | 8.60E-06    | 0.403863675 |
| cg12208258 | CDH2;CDH2                          | 0.000290372 | 0.403855147 |
| cg02721665 | GPR26                              | 1.96E-05    | 0.403851968 |
| cg04730685 |                                    | 1.50E-05    | 0.403831483 |
| cg20113824 |                                    | 0.001948248 | 0.403814327 |
| cg12592359 | ASXL1;ASXL1                        | 0.000148457 | 0.403809754 |
| cg04342955 | SHISA9;SHISA9                      | 0.007873393 | 0.403773442 |
| cg17812664 |                                    | 0.000148457 | 0.403759387 |
| cg19677607 | NEFM;NEFM                          | 3.34E-05    | 0.403756776 |

|            |                                       |             |             |
|------------|---------------------------------------|-------------|-------------|
| cg23825335 | CADPS;CADPS;CADPS                     | 0.002304201 | 0.403738575 |
| cg21699330 | NFE2L3                                | 0.001376172 | 0.403704812 |
| cg20979852 | SPSB4                                 | 0.000955793 | 0.403695118 |
| cg20300343 |                                       | 5.59E-05    | 0.403665673 |
| cg19786084 | CACNG4                                | 9.24E-05    | 0.403660506 |
| cg06288251 | TMEM108;TMEM108                       | 0.000357885 | 0.403659289 |
| cg16559598 | TBX5;TBX5                             | 0.000233422 | 0.403648452 |
| cg17794169 | FGFR2;FGFR2;FGFR2;FGFR2;FGFR2         | 0.000290372 | 0.403630511 |
| cg24535910 | NPY1R                                 | 8.60E-06    | 0.403621754 |
| cg10588150 | CSMD2                                 | 1.11E-05    | 0.403620691 |
| cg23797411 | SORCS3                                | 5.59E-05    | 0.403584257 |
| cg11782779 | CDH6                                  | 9.04E-05    | 0.403583009 |
| cg00711072 | LOC404266;HOXB5;LOC404266;LOC404266;L | 0.000570759 | 0.403579847 |
| cg25571189 | LYPD1;LYPD1;LYPD1                     | 9.24E-05    | 0.403579484 |
| cg07600871 | BRUNOL4;BRUNOL4;BRUNOL4;BRUNOL4       | 0.000117986 | 0.403568129 |
| cg06680481 | C20orf56                              | 1.11E-05    | 0.403561412 |
| cg18693673 | ZSCAN18;ZSCAN18                       | 7.23E-05    | 0.403558406 |
| cg13382769 | MAGI2                                 | 8.60E-06    | 0.403553357 |
| cg07300408 | RNASE12;RNASE11;RNASE12;RNASE11       | 0.000187194 | 0.403545024 |
| cg24115264 | TNFSF11;TNFSF11                       | 0.000117986 | 0.403540307 |
| cg15020568 |                                       | 1.50E-05    | 0.403536091 |
| cg12690119 | ZBTB38;ZBTB38                         | 0.000233422 | 0.40352789  |
| cg26429925 | BNC1                                  | 1.96E-05    | 0.403526379 |
| cg06368590 | TRPS1                                 | 0.000262362 | 0.403519404 |
| cg25198847 |                                       | 4.34E-05    | 0.403516836 |
| cg15015109 | HELZ                                  | 4.34E-05    | 0.403506469 |
| cg14235846 | NXN                                   | 0.000233422 | 0.4035051   |
| cg23889010 | SLPI                                  | 0.000148457 | 0.403489454 |
| cg19673549 |                                       | 7.23E-05    | 0.403488948 |
| cg09813525 | PCDH8;PCDH8                           | 7.23E-05    | 0.403453716 |
| cg13733708 | ZNF335                                | 1.96E-05    | 0.403415614 |
| cg16899991 |                                       | 0.000187194 | 0.403408863 |
| cg04317962 |                                       | 0.000955793 | 0.403390813 |
| cg24808280 | C1orf114                              | 0.000117986 | 0.40334749  |
| cg04339360 | KLF5                                  | 4.34E-05    | 0.403341414 |
| cg19535896 | ZSWIM2;ZSWIM2                         | 0.000122184 | 0.403338808 |
| cg21794225 | PRKD1                                 | 1.11E-05    | 0.403334585 |
| cg08682625 | LOC727677                             | 0.000187194 | 0.403329562 |
| cg23441441 | LIN7A                                 | 3.34E-05    | 0.403297313 |
| cg02699336 | ERC2                                  | 3.34E-05    | 0.403296216 |
| cg07241925 | MAEA;MAEA                             | 1.50E-05    | 0.403289088 |
| cg04047221 | SOX1;SOX1                             | 0.00043997  | 0.403287581 |
| cg19787694 | PRTN3                                 | 1.96E-05    | 0.403255234 |
| cg10660909 | CGREF1;CGREF1;CGREF1;CGREF1;CGREF1    | 0.000357885 | 0.403238081 |
| cg14381623 | LHX3;LHX3                             | 8.60E-06    | 0.403231148 |
| cg02491276 | FGF14                                 | 8.60E-06    | 0.403226711 |
| cg10762626 | OCA2                                  | 9.24E-05    | 0.403208453 |
| cg08297751 | HAND2                                 | 1.96E-05    | 0.403191387 |
| cg09997082 | GIPR                                  | 2.58E-05    | 0.403102229 |
| cg21977377 | NKX2-2                                | 0.000148457 | 0.403092942 |
| cg18932726 | DOCK1                                 | 0.000791389 | 0.403088914 |
| cg19019214 |                                       | 0.000233422 | 0.40307265  |
| cg18021368 | PCDHB5;PCDHB5                         | 1.50E-05    | 0.403069072 |
| cg07222505 | FAM169A                               | 7.23E-05    | 0.403055093 |
| cg00924255 |                                       | 1.11E-05    | 0.403053351 |
| cg14551002 | DOC2B                                 | 0.000122184 | 0.403041317 |
| cg03343571 | RNF39;RNF39                           | 0.000654035 | 0.403019387 |
| cg02662828 | ZAR1                                  | 8.60E-06    | 0.403016568 |
| cg22623649 |                                       | 5.59E-05    | 0.403004007 |
| cg04861929 | C11orf87                              | 4.34E-05    | 0.402990194 |

|            |                                        |             |             |
|------------|----------------------------------------|-------------|-------------|
| cg03629943 | CNNM1                                  | 3.34E-05    | 0.402980109 |
| cg12638731 | NBEA                                   | 8.60E-06    | 0.402977375 |
| cg21711132 | GABRG3                                 | 7.23E-05    | 0.402957509 |
| cg21502255 |                                        | 0.001147425 | 0.402954049 |
| cg16107724 |                                        | 1.50E-05    | 0.402894313 |
| cg02741440 | PLCXD3                                 | 1.11E-05    | 0.402877369 |
| cg03847716 |                                        | 1.96E-05    | 0.402858321 |
| cg03820688 | MTIF2;MTIF2                            | 3.92E-05    | 0.402839842 |
| cg01493740 | GJA1                                   | 1.50E-05    | 0.402835534 |
| cg22562942 | NEFM;NEFM                              | 7.23E-05    | 0.402827039 |
| cg00031165 | RUNDC3B;ABCB1;RUNDC3B;RUNDC3B          | 0.000117986 | 0.402816937 |
| cg02392634 | ANK1                                   | 2.58E-05    | 0.402806631 |
| cg00028935 | ZIC4;ZIC4;ZIC4                         | 1.96E-05    | 0.402789154 |
| cg03169018 | NEFM;NEFM                              | 2.58E-05    | 0.402777062 |
| cg26650064 |                                        | 1.50E-05    | 0.402769202 |
| cg20584905 | PAX3;PAX3;PAX3;CCDC140;PAX3;PAX3;PAX3  | 1.96E-05    | 0.40276449  |
| cg20965743 | ASPG                                   | 4.34E-05    | 0.402751192 |
| cg26330116 | LOC145845                              | 7.23E-05    | 0.402735951 |
| cg00954382 | NPY2R                                  | 1.50E-05    | 0.402714073 |
| cg08605326 | CA10;CA10;CA10                         | 2.58E-05    | 0.402711087 |
| cg15970666 |                                        | 0.000117986 | 0.402707086 |
| cg08658787 |                                        | 1.96E-05    | 0.402698267 |
| cg16802439 | GALNS                                  | 5.59E-05    | 0.402695789 |
| cg26818625 |                                        | 0.000117986 | 0.402687717 |
| cg11873147 | C1QL2                                  | 3.34E-05    | 0.402665527 |
| cg06085877 | CCK                                    | 0.00043997  | 0.402655693 |
| cg14519115 | PLCXD3;PLCXD3                          | 1.50E-05    | 0.402643843 |
| cg22456692 | WWC1;WWC1;WWC1                         | 0.000117986 | 0.402635942 |
| cg07143083 | WBSCR17                                | 3.34E-05    | 0.402611796 |
| cg05474726 | MIR124-2                               | 1.96E-05    | 0.402609778 |
| cg04974062 | PRDM13                                 | 1.50E-05    | 0.40259009  |
| cg08398132 |                                        | 1.11E-05    | 0.402583809 |
| cg05344430 | GSX1                                   | 0.000148457 | 0.402565474 |
| cg04382396 | ELANE;ELANE                            | 2.58E-05    | 0.402543817 |
| cg24059119 |                                        | 2.58E-05    | 0.402540445 |
| cg20375342 | FAM19A4;FAM19A4                        | 1.96E-05    | 0.402494823 |
| cg17100158 | ZNF385B;ZNF385B;ZNF385B                | 0.000187194 | 0.402474974 |
| cg20340302 | BMP7                                   | 3.34E-05    | 0.402467595 |
| cg13509702 | SCRIB;SCRIB;MIR937                     | 5.59E-05    | 0.402466047 |
| cg24827660 | PHACTR3                                | 8.60E-06    | 0.402449756 |
| cg26332253 | GJA1                                   | 1.96E-05    | 0.402441151 |
| cg15680720 |                                        | 5.59E-05    | 0.402436454 |
| cg00652796 | EPHA6                                  | 3.34E-05    | 0.402429333 |
| cg25406138 | POU4F2                                 | 8.60E-06    | 0.402408018 |
| cg08867893 | ZNF365;ZNF365;ZNF365;ZNF365;ZNF365;ZNF | 0.000233422 | 0.402404833 |
| cg22488859 | CYP1B1                                 | 0.000955793 | 0.402388914 |
| cg02841000 |                                        | 1.96E-05    | 0.402362638 |
| cg25318270 | PPP2R2C                                | 0.000117986 | 0.402352834 |
| cg27308329 | FAM19A5                                | 7.23E-05    | 0.40234008  |
| cg12412390 | UNC5C                                  | 5.59E-05    | 0.402332452 |
| cg15736165 | BNC1                                   | 8.60E-06    | 0.402316309 |
| cg08343042 | TMEM163                                | 0.000357885 | 0.402310875 |
| cg23217512 |                                        | 0.000537905 | 0.402305275 |
| cg22072795 |                                        | 7.23E-05    | 0.402291055 |
| cg01297721 | HAPLN4;HAPLN4                          | 4.34E-05    | 0.402276881 |
| cg07897451 |                                        | 7.23E-05    | 0.402256848 |
| cg16048517 | CTNND2                                 | 9.24E-05    | 0.402239289 |
| cg14276488 | SLC1A1                                 | 0.000148457 | 0.402232129 |
| cg26730416 |                                        | 0.00043997  | 0.402227355 |
| cg26981309 | MCHR2;MCHR2;MCHR2                      | 1.11E-05    | 0.402221624 |

|            |                                         |             |             |
|------------|-----------------------------------------|-------------|-------------|
| cg20072442 | CTNNA2;LRRTM1;CTNNA2                    | 7.23E-05    | 0.402213709 |
| cg15927927 | PPP2R2B;PPP2R2B;PPP2R2B;PPP2R2B;PPP2R2B | 3.34E-05    | 0.40220038  |
| cg00811334 | CTNNA2;CTNNA2                           | 8.60E-06    | 0.402198315 |
| cg12473912 |                                         | 0.000537905 | 0.402145471 |
| cg09793172 | KIF17;KIF17                             | 4.34E-05    | 0.402137825 |
| cg23207710 | FGF12;FGF12                             | 0.000290372 | 0.402121495 |
| cg26267430 |                                         | 0.000955793 | 0.402108477 |
| cg23491599 | KCNJ3                                   | 5.59E-05    | 0.402090415 |
| cg02215115 | KCNK5                                   | 0.000357885 | 0.402088974 |
| cg06352352 | C16orf70                                | 1.96E-05    | 0.402074592 |
| cg07592963 | KCNQ1DN                                 | 0.000290372 | 0.402043596 |
| cg00204501 | TJP1;TJP1;TJP1;TJP1                     | 3.34E-05    | 0.402043174 |
| cg12516359 |                                         | 1.96E-05    | 0.402029752 |
| cg16781264 | NMS                                     | 1.96E-05    | 0.401990408 |
| cg02456451 |                                         | 2.58E-05    | 0.401989805 |
| cg26224018 | CACHD1                                  | 0.000290372 | 0.401965881 |
| cg08640634 | NR2E1                                   | 4.34E-05    | 0.401955251 |
| cg19715410 | OPRD1                                   | 0.000654035 | 0.401947582 |
| cg13984515 | CYR61                                   | 9.24E-05    | 0.401933348 |
| cg08473752 | NLK                                     | 1.50E-05    | 0.401925615 |
| cg23828301 | IL5RA;IL5RA                             | 9.24E-05    | 0.401905272 |
| cg19270858 | KRT18;KRT18                             | 9.24E-05    | 0.401888325 |
| cg15975574 | RUNX1T1                                 | 8.60E-06    | 0.401886157 |
| cg03340036 | PIGY;PIGY                               | 7.23E-05    | 0.401876945 |
| cg22945387 | SFTA3                                   | 8.60E-06    | 0.401873894 |
| cg18430156 | FAM171B;FAM171B                         | 9.24E-05    | 0.40186266  |
| cg23310835 |                                         | 0.000117986 | 0.401855367 |
| cg25147376 | ILDR2                                   | 1.11E-05    | 0.401851956 |
| cg00097146 | SIX3                                    | 3.34E-05    | 0.401843305 |
| cg08031368 | VSNL1                                   | 4.34E-05    | 0.401807374 |
| cg08933227 | ELOVL4                                  | 7.23E-05    | 0.401805223 |
| cg04832177 |                                         | 1.11E-05    | 0.401800215 |
| cg07093324 | ACTR3                                   | 0.000233422 | 0.401797098 |
| cg24593372 | C1orf83                                 | 4.34E-05    | 0.401791964 |
| cg16391955 |                                         | 5.59E-05    | 0.401789318 |
| cg07015629 | ERBB4;ERBB4                             | 1.50E-05    | 0.401764597 |
| cg17837191 | TEX2                                    | 9.24E-05    | 0.40175245  |
| cg23117778 | RAD21L1                                 | 0.000122184 | 0.401742274 |
| cg22507154 |                                         | 7.23E-05    | 0.401723228 |
| cg05208605 |                                         | 1.50E-05    | 0.401704746 |
| cg17314538 | MTNR1A                                  | 1.96E-05    | 0.401699103 |
| cg15379412 | NR2F2;NR2F2;NR2F2;NR2F2;MIR1469;NR2F2   | 1.11E-05    | 0.40166606  |
| cg03096126 | ZNF532                                  | 5.59E-05    | 0.401656935 |
| cg27391816 | SLC35E2                                 | 0.000148457 | 0.401633601 |
| cg12664464 | GATA5;GATA5                             | 0.000791389 | 0.401630137 |
| cg06938264 | PCDHA6;PCDHA2;PCDHA1;PCDHA7;PCDHA1      | 2.58E-05    | 0.401606843 |
| cg06708634 | SIM1                                    | 7.23E-05    | 0.401602386 |
| cg25623768 |                                         | 0.000148457 | 0.401595262 |
| cg26709988 | CRISPLD2                                | 0.001639597 | 0.401591891 |
| cg13378394 | KCNC3                                   | 1.50E-05    | 0.401590209 |
| cg02481000 | PRKCZ;PRKCZ;PRKCZ                       | 2.58E-05    | 0.401579438 |
| cg00688962 | KCNIP4                                  | 1.11E-05    | 0.401575393 |
| cg26364205 | EPHA6                                   | 1.11E-05    | 0.401568836 |
| cg00675229 |                                         | 0.000955793 | 0.401556256 |
| cg26509328 |                                         | 1.96E-05    | 0.401526239 |
| cg09225287 | SEMA3C                                  | 1.11E-05    | 0.401517989 |
| cg02935154 | VWDE;VWDE                               | 3.34E-05    | 0.401487521 |
| cg09408098 |                                         | 9.24E-05    | 0.40147898  |
| cg24880665 | KDM5B                                   | 9.24E-05    | 0.401472942 |
| cg20986996 | TCF21;TCF21                             | 8.60E-06    | 0.401459539 |

|            |                                     |             |             |
|------------|-------------------------------------|-------------|-------------|
| cg19724555 | GALNT9                              | 2.58E-05    | 0.401458621 |
| cg18732032 | TFAP2A                              | 1.50E-05    | 0.401443142 |
| cg02309841 | VGLL4                               | 0.000148457 | 0.401423571 |
| cg19165390 |                                     | 2.58E-05    | 0.401417942 |
| cg12271981 | SLITRK5                             | 0.000117986 | 0.401415957 |
| cg06474225 | HTRA1                               | 0.000791389 | 0.401413198 |
| cg18343474 |                                     | 8.60E-06    | 0.401401317 |
| cg00147462 |                                     | 5.59E-05    | 0.401399048 |
| cg02055132 | EPHA6                               | 0.000148457 | 0.401383634 |
| cg10338518 | AFF1                                | 0.000290372 | 0.401373342 |
| cg13011388 | EFS;EFS                             | 0.000117986 | 0.40135807  |
| cg00088130 | SOX14                               | 1.50E-05    | 0.401350075 |
| cg23056157 | NALCN                               | 2.58E-05    | 0.401340268 |
| cg22914729 | PITX2;PITX2;PITX2                   | 5.59E-05    | 0.401338462 |
| cg10375890 |                                     | 9.24E-05    | 0.401329926 |
| cg05211057 | COL9A1;COL9A1                       | 8.60E-06    | 0.401321644 |
| cg17147211 |                                     | 0.00043997  | 0.401316812 |
| cg03509106 | C4orf31                             | 2.58E-05    | 0.401311715 |
| cg26839512 | SPATA18                             | 0.003734675 | 0.401288484 |
| cg17152981 | GPR6                                | 2.58E-05    | 0.401287407 |
| cg01057656 | CBLC;CBLC;CBLC;CBLC                 | 0.003189589 | 0.401255186 |
| cg21302951 | KCNH7;KCNH7                         | 3.34E-05    | 0.401252169 |
| cg09891125 |                                     | 0.000537905 | 0.401229684 |
| cg13457172 | VAX1;VAX1                           | 2.58E-05    | 0.401221121 |
| cg14468658 | PCDHGA2;PCDHGA3;PCDHGA1;PCDHGA3     | 1.96E-05    | 0.401217053 |
| cg23413924 | DUOX1;DUOX1                         | 3.34E-05    | 0.401199597 |
| cg23847381 | EPB41L3                             | 0.000654035 | 0.401166608 |
| cg12507125 | WWTR1;WWTR1;WWTR1                   | 4.34E-05    | 0.401147402 |
| cg07961994 | GRID2                               | 1.11E-05    | 0.401143751 |
| cg14069192 | CDC14B;CDC14B                       | 1.50E-05    | 0.401138438 |
| cg00345443 |                                     | 0.000148457 | 0.401136183 |
| cg02898094 | DLX6AS;DLX6                         | 9.24E-05    | 0.401102449 |
| cg08633074 | TXNDC11                             | 4.34E-05    | 0.401093261 |
| cg14636534 | LOC645323;LOC645323;LOC645323       | 3.34E-05    | 0.401076628 |
| cg14851108 | GRID1                               | 0.000233422 | 0.401061161 |
| cg25588844 | TAF1B                               | 9.24E-05    | 0.40104909  |
| cg15696906 | TRPC4;TRPC4;TRPC4;TRPC4;TRPC4;TRPC4 | 8.60E-06    | 0.401005419 |
| cg14362630 |                                     | 7.23E-05    | 0.400997892 |
| cg07380506 | CYP1B1                              | 0.000357885 | 0.400975697 |
| cg10702770 |                                     | 8.60E-06    | 0.400953029 |
| cg14612428 | GNAL;GNAL;GNAL;GNAL;GNAL            | 8.60E-06    | 0.400931455 |
| cg05446424 | FAM84A                              | 9.24E-05    | 0.400886331 |
| cg19819285 | ZSCAN1                              | 1.11E-05    | 0.400853788 |
| cg02918054 | SSTR1                               | 9.24E-05    | 0.400841579 |
| cg26283893 | HOXC13                              | 1.96E-05    | 0.400826581 |
| cg15365032 |                                     | 8.60E-06    | 0.400794707 |
| cg15445554 | SLC6A1                              | 1.50E-05    | 0.400792716 |
| cg25143824 | PAK7;PAK7                           | 2.58E-05    | 0.400782606 |
| cg19091036 |                                     | 1.50E-05    | 0.400780691 |
| cg20449670 |                                     | 0.000187194 | 0.400759474 |
| cg18376288 |                                     | 8.60E-06    | 0.400747464 |
| cg04859466 | SOX2OT                              | 1.96E-05    | 0.400745634 |
| cg04598121 | PENK;PENK                           | 8.60E-06    | 0.400739816 |
| cg14972743 | ZSCAN18;ZSCAN18;ZSCAN18;ZSCAN18     | 0.000233422 | 0.400724776 |
| cg07104706 | SLITRK1;SLITRK1                     | 5.59E-05    | 0.400721273 |
| cg24923694 |                                     | 3.34E-05    | 0.400704878 |
| cg09851951 |                                     | 0.000117986 | 0.400695826 |
| cg26296364 | TMEM26                              | 1.50E-05    | 0.400692892 |
| cg23202722 | PHC2;PHC2                           | 7.23E-05    | 0.400679875 |
| cg08700032 |                                     | 3.34E-05    | 0.400664573 |



|            |                                    |             |             |
|------------|------------------------------------|-------------|-------------|
| cg02647941 | ZIC1                               | 3.34E-05    | 0.400664295 |
| cg10297191 | CYP39A1;SLC25A27                   | 1.96E-05    | 0.400649314 |
| cg02162886 | SIX1                               | 0.000262362 | 0.400645969 |
| cg24705960 | FEZF2                              | 9.24E-05    | 0.400626689 |
| cg25355316 |                                    | 1.50E-05    | 0.40061823  |
| cg21547982 | MAGI1;MAGI1;MAGI1                  | 5.59E-05    | 0.400592577 |
| cg18443253 | SSTR1                              | 0.000654035 | 0.400591373 |
| cg03307177 |                                    | 0.000791389 | 0.400588737 |
| cg12787323 |                                    | 0.00043997  | 0.400566879 |
| cg20635409 |                                    | 8.60E-06    | 0.400536028 |
| cg00590036 | TMEM181                            | 0.000290372 | 0.400528764 |
| cg04943986 | NR2F2;NR2F2                        | 8.60E-06    | 0.400527221 |
| cg23626122 | SLITRK3                            | 0.000148457 | 0.400504583 |
| cg00074145 | ONECUT1                            | 0.000117986 | 0.400499037 |
| cg12069267 |                                    | 1.50E-05    | 0.400485257 |
| cg22680204 | CRMP1                              | 1.11E-05    | 0.400477049 |
| cg02824202 |                                    | 0.000187194 | 0.400471592 |
| cg26517171 | TLX3                               | 8.60E-06    | 0.400469076 |
| cg27117982 | MGST1;MGST1;MGST1;MGST1            | 1.96E-05    | 0.400465662 |
| cg11327408 | TRIM39;TRIM39                      | 2.58E-05    | 0.400458901 |
| cg13794993 | SALL3                              | 8.60E-06    | 0.400439905 |
| cg14676529 | PCDHA6;PCDHA2;PCDHA1;PCDHA9;PCDHA7 | 7.23E-05    | 0.400390951 |
| cg13560871 | C1orf115                           | 0.001948248 | 0.400386016 |
| cg08437576 | PAQR5;PAQR5                        | 0.000537905 | 0.400381282 |
| cg07489502 | PCDHGA4;PCDHGA11;PCDHGA11;PCDHGA9  | 0.009066563 | 0.400366759 |
| cg06486190 | MDFIC;MDFIC                        | 0.000537905 | 0.400357605 |
| cg14031054 | PBX1                               | 3.34E-05    | 0.400351707 |
| cg17866667 | CACNG8                             | 1.11E-05    | 0.400351326 |
| cg23632985 |                                    | 1.50E-05    | 0.400332889 |
| cg22520644 | WDR17;WDR17                        | 0.000357885 | 0.400331607 |
| cg13043862 | EYA1                               | 5.59E-05    | 0.40029462  |
| cg07973435 | SIM1                               | 4.34E-05    | 0.400283913 |
| cg18394533 | MOCS1;MOCS1                        | 1.96E-05    | 0.400259646 |
| cg06416733 |                                    | 2.39E-05    | 0.400251272 |
| cg19414741 | PENK;PENK                          | 1.11E-05    | 0.400250697 |
| cg01926051 | ESRRG                              | 9.24E-05    | 0.400244316 |
| cg11832210 | SLC16A12                           | 0.00041966  | 0.40023925  |
| cg20890210 | KCNB2                              | 8.60E-06    | 0.400238465 |
| cg07009376 |                                    | 0.000290372 | 0.4002229   |
| cg06827562 |                                    | 1.96E-05    | 0.400218725 |
| cg07393734 |                                    | 5.59E-05    | 0.400187004 |
| cg07408835 | PCDHAC1;PCDHA7;PCDHAC1;PCDHA12;PCD | 1.50E-05    | 0.400182573 |
| cg21669441 | AP3B2                              | 1.50E-05    | 0.400174736 |
| cg09054949 | CXCL1                              | 1.50E-05    | 0.40017198  |
| cg02879662 | HIF3A;HIF3A                        | 0.000148457 | 0.400157059 |
| cg22575603 |                                    | 1.96E-05    | 0.400116849 |
| cg01296889 |                                    | 0.000148457 | 0.400101116 |
| cg10182697 | NKX6-2                             | 0.000148457 | 0.400098555 |
| cg14984684 | RASGRF1;RASGRF1                    | 1.11E-05    | 0.400095395 |
| cg23335460 | CRTAC1                             | 4.34E-05    | 0.400052166 |
| cg26925231 | SGCZ                               | 0.000117986 | 0.400037705 |
| cg04778012 | STAG3;GPC2                         | 7.23E-05    | 0.400032249 |
| cg14714797 | AHRR                               | 0.00043997  | 0.400023655 |
| cg00959431 |                                    | 1.11E-05    | 0.400019272 |
| cg02484469 | GATA5                              | 0.000537905 | 0.400014095 |
| cg08637438 |                                    | 8.60E-06    | 0.400004605 |
| cg04261192 | NELL1;NELL1                        | 0.000357885 | 0.399930616 |
| cg25198049 | CGN                                | 3.34E-05    | 0.399919614 |
| cg21914290 | PRRX1;PRRX1                        | 7.23E-05    | 0.399909498 |
| cg17035091 | CAMK2B;CAMK2B;CAMK2B;CAMK2B;CAMK2B | 0.000537905 | 0.399892162 |

|            |                                       |             |             |
|------------|---------------------------------------|-------------|-------------|
| cg14557699 | PCDHA12;PCDHA7;PCDHA6;PCDHA10;PCDH    | 0.000187194 | 0.399866672 |
| cg09076077 | C20orf197                             | 0.000117986 | 0.399862855 |
| cg04801617 | RFX4                                  | 7.94E-05    | 0.399830304 |
| cg02052762 | ANKFY1                                | 4.34E-05    | 0.399785571 |
| cg10551134 |                                       | 0.00043997  | 0.399772737 |
| cg00721170 | CXCL5                                 | 2.58E-05    | 0.399748519 |
| cg26836233 | SLC6A11                               | 8.60E-06    | 0.399737189 |
| cg16935065 | ST6GAL2;ST6GAL2;ST6GAL2               | 1.96E-05    | 0.399736236 |
| cg25248415 |                                       | 0.000117986 | 0.399693386 |
| cg04172348 | SYN2;SYN2;SYN2;SYN2                   | 4.34E-05    | 0.399688155 |
| cg24899571 | JAM3                                  | 0.000117986 | 0.399679553 |
| cg10572355 |                                       | 4.34E-05    | 0.399647252 |
| cg00574907 | SEPT10;SEPT10;ANKRD57                 | 9.24E-05    | 0.399619432 |
| cg11926610 |                                       | 8.60E-06    | 0.399604424 |
| cg06788631 |                                       | 9.24E-05    | 0.399603284 |
| cg24284973 | NTM;NTM;NTM;NTM                       | 0.000187194 | 0.399577201 |
| cg21200408 | NKX2-4                                | 9.24E-05    | 0.399571234 |
| cg06724588 | SALL1;SALL1                           | 0.000357885 | 0.399564346 |
| cg04205769 | DPH5;DPH5;DPH5                        | 0.000654035 | 0.399555533 |
| cg05350411 |                                       | 8.60E-06    | 0.399547746 |
| cg03555227 | RANBP17                               | 8.60E-06    | 0.399544162 |
| cg16099804 | EDIL3;EDIL3                           | 9.24E-05    | 0.399540835 |
| cg09375033 | DZIP1L;DZIP1L                         | 0.000187194 | 0.399513988 |
| cg27265170 | DMRTA2                                | 1.96E-05    | 0.399490051 |
| cg24190603 | SNAP91;SNAP91                         | 0.000654035 | 0.39944392  |
| cg22926931 | MYOD1                                 | 1.11E-05    | 0.399423233 |
| cg00754604 | RBMS1;RBMS1                           | 2.58E-05    | 0.399404129 |
| cg19592472 | OXT;OXT                               | 5.59E-05    | 0.399391725 |
| cg01357292 | ZNF662;ZNF662;ZNF662                  | 2.58E-05    | 0.399390901 |
| cg12515917 | TG                                    | 5.59E-05    | 0.399382574 |
| cg19915738 | ZNF229                                | 0.000117986 | 0.399379055 |
| cg14345154 | TTC8;TTC8;TTC8                        | 0.000955793 | 0.399372664 |
| cg00631482 | RAP1GAP;RAP1GAP;RAP1GAP               | 0.000290372 | 0.399359162 |
| cg03365311 | MIR129-2                              | 8.60E-06    | 0.399348637 |
| cg03287339 | WDR90                                 | 8.60E-06    | 0.399340142 |
| cg13679303 |                                       | 2.58E-05    | 0.39931301  |
| cg18358869 |                                       | 1.50E-05    | 0.399304177 |
| cg05048199 | FBXL2;FBXL2                           | 0.000187194 | 0.399297032 |
| cg02124887 |                                       | 0.006823935 | 0.399291855 |
| cg01866955 |                                       | 2.58E-05    | 0.399291477 |
| cg03598338 | BCAR1;BCAR1;BCAR1;BCAR1;BCAR1         | 3.34E-05    | 0.399274573 |
| cg22595235 | LRRN1                                 | 7.23E-05    | 0.399264116 |
| cg01822130 | EPHA6                                 | 0.000117986 | 0.399255729 |
| cg06634716 | ESRRG                                 | 2.58E-05    | 0.399241723 |
| cg13982454 | PRTG                                  | 0.000117986 | 0.399240906 |
| cg00590324 | TCF21;TCF21                           | 0.000290372 | 0.399240621 |
| cg14074052 |                                       | 1.18E-05    | 0.39922702  |
| cg27480727 | PAX3;PAX3;PAX3;PAX3;PAX3;CCDC140;PAX3 | 1.50E-05    | 0.399216845 |
| cg18713028 |                                       | 2.58E-05    | 0.399201817 |
| cg27592331 | GATA6                                 | 0.000148457 | 0.399193748 |
| cg16218721 | HOXD4                                 | 1.11E-05    | 0.399189064 |
| cg00780971 |                                       | 0.000117986 | 0.399185789 |
| cg03983476 | NOL10                                 | 5.59E-05    | 0.399131073 |
| cg16126816 | EGFLAM;EGFLAM                         | 0.000117986 | 0.399120834 |
| cg10151685 |                                       | 2.58E-05    | 0.399112648 |
| cg13867865 | C12orf56;C12orf56                     | 0.000526175 | 0.399112145 |
| cg10487428 | PDE4D                                 | 1.11E-05    | 0.39908383  |
| cg24505892 |                                       | 0.000955793 | 0.39908144  |
| cg02161900 | MKX                                   | 1.11E-05    | 0.399068711 |
| cg05826255 | ST8SIA3                               | 7.23E-05    | 0.399049867 |

|            |                                    |             |              |
|------------|------------------------------------|-------------|--------------|
| cg13724788 | NCAN                               | 5.59E-05    | 0.399000892  |
| cg16956686 | SDK1;SDK1                          | 9.24E-05    | 0.398963544  |
| cg07270078 | ISL1                               | 3.34E-05    | 0.398961885  |
| cg15169266 |                                    | 4.34E-05    | 0.39895653   |
| cg15424250 | SCRN1;SCRN1;SCRN1;SCRN1            | 0.001639597 | 0.398952004  |
| cg09183753 | TFAP2C                             | 2.58E-05    | 0.398946295  |
| cg11527913 | GALNT2                             | 2.58E-05    | 0.398933962  |
| cg01461410 | TBX18                              | 4.34E-05    | 0.398919672  |
| cg23854488 | FGF4                               | 0.000148457 | 0.398910515  |
| cg00812833 | PLD5                               | 0.000955793 | 0.398902058  |
| cg00955967 |                                    | 0.000117986 | 0.398896074  |
| cg04488111 | PMVK                               | 0.000187194 | 0.3988869194 |
| cg20374054 | ROBO3                              | 0.000117986 | 0.398886868  |
| cg18758906 |                                    | 1.96E-05    | 0.3988868269 |
| cg05022673 | DST;BEND6                          | 0.00045851  | 0.3988831164 |
| cg27058257 | VSTM2B                             | 0.001376172 | 0.3988831126 |
| cg27593384 | CDH2                               | 0.000148457 | 0.398823898  |
| cg14985989 | MADCAM1;MADCAM1                    | 0.000357885 | 0.398823528  |
| cg03489969 | MATN2;MATN2                        | 3.34E-05    | 0.398821008  |
| cg27425452 | PARK2;PACRG;PARK2;PACRG;PACRG;PARK | 4.34E-05    | 0.398809887  |
| cg22821324 | GPM6A;GPM6A                        | 0.000357885 | 0.398807047  |
| cg03193328 | TPST1                              | 0.000654035 | 0.398800139  |
| cg03882167 | FAM123C;FAM123C;FAM123C;FAM123C    | 2.58E-05    | 0.398799666  |
| cg01924596 | PDZD2                              | 0.000148457 | 0.398774596  |
| cg26703456 | KIAA1486                           | 7.23E-05    | 0.398754227  |
| cg06161738 | GALNT11                            | 0.00043997  | 0.398748317  |
| cg02043159 | PCDH10;PCDH10                      | 0.000290372 | 0.398738879  |
| cg04609694 |                                    | 2.58E-05    | 0.398733984  |
| cg05344949 |                                    | 5.59E-05    | 0.398727172  |
| cg02728595 |                                    | 0.001393182 | 0.398709811  |
| cg22535307 | FBN1                               | 0.000187194 | 0.398674355  |
| cg03819783 |                                    | 1.96E-05    | 0.398668993  |
| cg24550026 | BCL2L15;BCL2L15                    | 0.000357885 | 0.398651191  |
| cg14592474 | MAGI2                              | 0.00043997  | 0.398640514  |
| cg25192419 | DOCK5;DOCK5                        | 0.000537905 | 0.398624619  |
| cg01097384 |                                    | 0.000148457 | 0.398610521  |
| cg24279418 |                                    | 1.96E-05    | 0.398603575  |
| cg19228118 | CSMD2;C1orf94                      | 4.34E-05    | 0.398602753  |
| cg01281911 | FOX E3                             | 7.23E-05    | 0.398573246  |
| cg21184585 | SEPT10;ANKRD57;SEPT10              | 3.34E-05    | 0.398550838  |
| cg01490094 |                                    | 1.96E-05    | 0.398489089  |
| cg05158197 | SPOCK3;SPOCK3                      | 0.000187194 | 0.398482439  |
| cg04938966 |                                    | 8.60E-06    | 0.39847945   |
| cg08790676 |                                    | 0.001948248 | 0.398476043  |
| cg09342766 | RIMS1                              | 3.34E-05    | 0.398465134  |
| cg02192300 |                                    | 0.000955793 | 0.398457543  |
| cg00779065 |                                    | 0.000148457 | 0.398447629  |
| cg02256049 |                                    | 0.000537905 | 0.398425739  |
| cg16854917 | NCRNA00085                         | 0.000654035 | 0.398420667  |
| cg14480507 |                                    | 1.50E-05    | 0.39840609   |
| cg06997767 | TRPS1                              | 9.24E-05    | 0.398399855  |
| cg08857994 |                                    | 1.50E-05    | 0.398399018  |
| cg13980454 | NKX2-1;NKX2-1                      | 0.000233422 | 0.398395482  |
| cg05008854 | KIN                                | 1.11E-05    | 0.398395342  |
| cg09624466 | OTX2OS1                            | 0.00043997  | 0.398370613  |
| cg06312785 | PPP2R3A                            | 0.000117986 | 0.398349506  |
| cg07212327 | FAM49B                             | 0.000117986 | 0.398344791  |
| cg21249659 | OLR1                               | 1.96E-05    | 0.398331023  |
| cg11564711 |                                    | 1.96E-05    | 0.398329824  |
| cg18473521 | HOXC4;HOXC4                        | 0.000117986 | 0.398312894  |

|            |                                       |             |             |
|------------|---------------------------------------|-------------|-------------|
| cg02954212 | LOC283856;GNAO1;GNAO1                 | 3.34E-05    | 0.398302679 |
| cg06056415 |                                       | 2.58E-05    | 0.398286504 |
| cg24746100 | FOXI3                                 | 7.23E-05    | 0.398245131 |
| cg17309441 |                                       | 7.23E-05    | 0.398243326 |
| cg24934063 | FEZF1;FEZF1                           | 5.59E-05    | 0.398236391 |
| cg06820905 |                                       | 1.50E-05    | 0.398236067 |
| cg20504856 |                                       | 4.34E-05    | 0.398188427 |
| cg12992827 |                                       | 9.24E-05    | 0.398187284 |
| cg11241498 |                                       | 1.96E-05    | 0.398132247 |
| cg13257636 | CLIP4                                 | 0.000233422 | 0.398125049 |
| cg16659043 | SAMD12;SAMD12                         | 3.34E-05    | 0.398113198 |
| cg24777950 | CTSG                                  | 4.34E-05    | 0.398094196 |
| cg21122424 |                                       | 0.000148457 | 0.398077804 |
| cg08714996 | PCDHGB1;PCDHGA2;PCDHGA1;PCDHGB1;PC    | 0.001948248 | 0.398059665 |
| cg10544031 | PAX3;PAX3;PAX3;PAX3;PAX3;CCDC140;PAX3 | 8.60E-06    | 0.3980321   |
| cg09363443 |                                       | 8.60E-06    | 0.398026654 |
| cg22632840 | SSH3                                  | 0.000357885 | 0.39802363  |
| cg19047707 | ECEL1                                 | 4.34E-05    | 0.398014749 |
| cg02353916 | LOC285550                             | 4.34E-05    | 0.398000903 |
| cg05580181 |                                       | 5.59E-05    | 0.397964359 |
| cg12440258 |                                       | 5.59E-05    | 0.397953891 |
| cg00584450 | FOXL1;FOXL1                           | 0.000290372 | 0.39794804  |
| cg16002305 |                                       | 0.000148457 | 0.397947802 |
| cg17029168 | NKX2-2;NKX2-2                         | 8.60E-06    | 0.397930258 |
| cg15202102 | PRKCDBP                               | 9.24E-05    | 0.397929274 |
| cg00059024 | WDR93;PEX11A                          | 5.59E-05    | 0.397903985 |
| cg03322353 | MAML3                                 | 0.001376172 | 0.397868308 |
| cg08822075 | NFE2L3                                | 7.23E-05    | 0.397858847 |
| cg02296171 |                                       | 3.34E-05    | 0.397845779 |
| cg20820063 | C18orf34;C18orf34;C18orf34            | 0.000148457 | 0.397837239 |
| cg22682154 |                                       | 1.50E-05    | 0.39783643  |
| cg11905007 | CADPS;CADPS;CADPS                     | 0.000233422 | 0.397800965 |
| cg09841488 | GLRA3;GLRA3                           | 3.34E-05    | 0.397780008 |
| cg06034527 |                                       | 0.000117986 | 0.397719211 |
| cg06266613 |                                       | 0.000148457 | 0.397708661 |
| cg15927720 | SLIT3                                 | 0.00043997  | 0.397706744 |
| cg18413131 | NUDT16P;NUDT16P                       | 0.000654035 | 0.397697091 |
| cg14330189 |                                       | 2.58E-05    | 0.39769574  |
| cg11828070 | GOLSYN;GOLSYN;GOLSYN;GOLSYN;GOLSYN    | 0.000654035 | 0.397668292 |
| cg16384774 | FOXN3;FOXN3                           | 2.58E-05    | 0.397666333 |
| cg11276093 | MYOF;MYOF                             | 2.58E-05    | 0.397660989 |
| cg27044455 |                                       | 4.34E-05    | 0.397660647 |
| cg22762615 | FGFR2;FGFR2;FGFR2;FGFR2;FGFR2         | 2.58E-05    | 0.39765634  |
| cg18314424 |                                       | 0.000233422 | 0.397649485 |
| cg14904662 | ANK1;ANK1;ANK1;ANK1;ANK1              | 9.24E-05    | 0.397643787 |
| cg17954152 | PROX1                                 | 4.34E-05    | 0.397631102 |
| cg25541209 | ZMYND8;ZMYND8;LOC100131496;ZMYND8     | 7.23E-05    | 0.397624446 |
| cg24151352 | FOXF2                                 | 0.000148457 | 0.397621826 |
| cg05942128 | HOXD11                                | 1.50E-05    | 0.397620107 |
| cg21964551 | LAD1                                  | 4.34E-05    | 0.397614722 |
| cg11548303 |                                       | 4.34E-05    | 0.397610438 |
| cg16689481 | TCHH                                  | 0.000117986 | 0.397604379 |
| cg07246273 |                                       | 2.58E-05    | 0.397594718 |
| cg12857945 | PAX9                                  | 1.11E-05    | 0.397592496 |
| cg10770187 | LYPD6                                 | 2.58E-05    | 0.397581174 |
| cg00829990 |                                       | 9.24E-05    | 0.397569361 |
| cg17177455 |                                       | 1.96E-05    | 0.397552662 |
| cg02711929 | HTRA1                                 | 7.23E-05    | 0.397531236 |
| cg19083779 | PRKAA2                                | 0.000233422 | 0.397523798 |
| cg16075649 | LOC283663                             | 2.58E-05    | 0.397505341 |

|            |                                    |             |             |
|------------|------------------------------------|-------------|-------------|
| cg04564030 | CDH7;CDH7                          | 8.60E-06    | 0.397499505 |
| cg07633317 | ZNF423                             | 0.002304201 | 0.397483613 |
| cg06984156 | CDA                                | 1.50E-05    | 0.397481933 |
| cg16823083 | WDR8                               | 4.34E-05    | 0.397473929 |
| cg10880485 |                                    | 8.60E-06    | 0.397465254 |
| cg16798252 | FLJ32063                           | 5.11E-05    | 0.39746091  |
| cg05927432 | GOLSYN;GOLSYN                      | 1.50E-05    | 0.397446348 |
| cg08065231 | ZNF177                             | 0.000117986 | 0.397442856 |
| cg17151990 | FAM110B;FAM110B                    | 0.004357816 | 0.397440071 |
| cg09499856 | PLCXD3                             | 1.50E-05    | 0.397431422 |
| cg07529754 | NRXN1;NRXN1;NRXN1                  | 0.000290372 | 0.397426642 |
| cg12883523 | SOX17                              | 2.58E-05    | 0.397419914 |
| cg04241652 | FLJ42875;PRDM16;PRDM16;FLJ42875    | 0.000117986 | 0.397418819 |
| cg11660146 | POU2F3                             | 0.000290372 | 0.397402819 |
| cg26633107 | FAM84A                             | 3.34E-05    | 0.397387615 |
| cg11732642 | SOX9                               | 9.24E-05    | 0.397382234 |
| cg22007666 | ESRRG;ESRRG;ESRRG;ESRRG;ESRRG      | 2.58E-05    | 0.397371633 |
| cg06761921 | BRUNOL4;BRUNOL4;BRUNOL4;BRUNOL4    | 4.34E-05    | 0.397359058 |
| cg02471153 | KCNS2                              | 4.34E-05    | 0.397344156 |
| cg07198881 | FAM78B                             | 2.58E-05    | 0.397341588 |
| cg09789874 |                                    | 1.11E-05    | 0.397321748 |
| cg18699744 | PNLIPRP2                           | 8.60E-06    | 0.397319491 |
| cg27022956 | SOX20T                             | 9.24E-05    | 0.397309393 |
| cg06927812 |                                    | 0.000122184 | 0.397297918 |
| cg17685628 | NKX2-8;NKX2-8                      | 1.50E-05    | 0.397291296 |
| cg15649236 | MIR10A                             | 0.000187194 | 0.39728223  |
| cg14458834 | HOXB4                              | 0.000290372 | 0.397278373 |
| cg07641160 | FAM162B;FAM162B                    | 0.000290372 | 0.397273169 |
| cg07721203 | ALDH1A2;ALDH1A2                    | 0.000117986 | 0.397268285 |
| cg07220782 | LOC100270746;C6orf41               | 0.000148457 | 0.397255717 |
| cg26577454 | CNTNAP4;CNTNAP4                    | 7.23E-05    | 0.397233276 |
| cg16370875 | ELOVL4                             | 3.34E-05    | 0.397215856 |
| cg14153637 | RALYL;RALYL;RALYL;RALYL            | 4.34E-05    | 0.397194298 |
| cg05053562 | NOTO                               | 9.24E-05    | 0.397172044 |
| cg06392753 | IL1R1                              | 0.00043997  | 0.397126094 |
| cg04656042 |                                    | 5.59E-05    | 0.397119433 |
| cg00149716 |                                    | 3.34E-05    | 0.397095239 |
| cg00316839 |                                    | 7.23E-05    | 0.397082909 |
| cg04166294 |                                    | 5.11E-05    | 0.397080947 |
| cg17918002 | MKX                                | 2.58E-05    | 0.397077469 |
| cg14039246 | ECHDC2                             | 7.23E-05    | 0.39706156  |
| cg10933003 | HAND2                              | 1.50E-05    | 0.397045317 |
| cg17412005 | MUTYH;MUTYH;MUTYH;TOE1;MUTYH;MUTYH | 4.34E-05    | 0.397029203 |
| cg10864319 | FIGN                               | 5.59E-05    | 0.397019898 |
| cg20431191 | DDAH1;DDAH1                        | 0.000117986 | 0.397018892 |
| cg02154186 | PNMA2;PNMA2                        | 1.11E-05    | 0.397002185 |
| cg26360616 |                                    | 3.34E-05    | 0.396985289 |
| cg13237068 | CENPJ                              | 0.000233422 | 0.396961552 |
| cg18364120 | AMICA1                             | 5.59E-05    | 0.396960057 |
| cg05658487 |                                    | 3.34E-05    | 0.396955321 |
| cg04469059 | NEUROG1                            | 4.34E-05    | 0.396948767 |
| cg11222127 | LHX5                               | 8.60E-06    | 0.396942721 |
| cg25532501 | GLB1L2                             | 4.34E-05    | 0.396941589 |
| cg15245709 |                                    | 9.24E-05    | 0.396906821 |
| cg18432099 | TACR1;TACR1                        | 0.000122184 | 0.396905313 |
| cg19656282 | TLX2                               | 0.001147425 | 0.396903629 |
| cg24436906 | BOK                                | 3.34E-05    | 0.396899364 |
| cg09543255 | SLC7A14                            | 5.59E-05    | 0.396889405 |
| cg00875989 |                                    | 4.34E-05    | 0.396882299 |
| cg16078649 | RNF39;RNF39                        | 7.23E-05    | 0.396879754 |

|            |                               |             |             |
|------------|-------------------------------|-------------|-------------|
| cg22805603 | NLRC4;NLRC4                   | 1.50E-05    | 0.396867586 |
| cg00157572 | SIX6                          | 8.60E-06    | 0.396862928 |
| cg27349081 | RIC3;RIC3                     | 2.58E-05    | 0.396852923 |
| cg05311388 | SCIN                          | 0.000233422 | 0.396779598 |
| cg13140167 | SYN3                          | 8.60E-06    | 0.396763232 |
| cg05363616 | TBX15                         | 8.60E-06    | 0.396747598 |
| cg21190228 | HDAC4                         | 9.04E-05    | 0.396701341 |
| cg01161204 |                               | 7.23E-05    | 0.396693587 |
| cg14290576 | NFIL3                         | 0.000654035 | 0.396684013 |
| cg21412973 |                               | 1.50E-05    | 0.396678949 |
| cg08977536 |                               | 8.60E-06    | 0.396640304 |
| cg09965258 | NFIB;NFIB                     | 7.23E-05    | 0.396629628 |
| cg14579819 | IGSF9B                        | 1.96E-05    | 0.396601675 |
| cg01404163 | TOX3;TOX3                     | 1.11E-05    | 0.396589306 |
| cg10171357 |                               | 2.58E-05    | 0.396576236 |
| cg06149159 |                               | 0.0050758   | 0.39655046  |
| cg19736128 | EFS;EFS;EFS;EFS               | 0.00043997  | 0.396546257 |
| cg22025849 |                               | 4.34E-05    | 0.396524402 |
| cg18623980 |                               | 0.000233422 | 0.396515173 |
| cg09660365 | SLC6A11                       | 3.34E-05    | 0.396499281 |
| cg10660256 | BHMT;BHMT                     | 1.50E-05    | 0.396498159 |
| cg02993352 | PNMA2                         | 0.000233422 | 0.396479583 |
| cg26614154 | C1orf92                       | 2.58E-05    | 0.396460614 |
| cg00622837 |                               | 9.24E-05    | 0.396445898 |
| cg10244340 |                               | 0.000955793 | 0.396427839 |
| cg08019736 |                               | 1.96E-05    | 0.396418967 |
| cg18361098 | PAX9                          | 1.50E-05    | 0.396417521 |
| cg08928408 |                               | 1.11E-05    | 0.39639241  |
| cg11199046 |                               | 1.11E-05    | 0.396381589 |
| cg11206067 | PHYHIPL;PHYHIPL               | 0.000233422 | 0.39636333  |
| cg00390775 | PRUNE2                        | 8.60E-06    | 0.396362019 |
| cg27376182 |                               | 0.000357885 | 0.396356637 |
| cg04664153 | GPR39                         | 0.000187194 | 0.396346518 |
| cg23506143 |                               | 0.000705485 | 0.396341475 |
| cg03992323 | TP53BP2;TP53BP2               | 3.34E-05    | 0.396333279 |
| cg07962338 |                               | 0.000357885 | 0.396331903 |
| cg18926797 | DCAF5                         | 3.34E-05    | 0.396300208 |
| cg16452651 | ITSN1;ITSN1                   | 0.000148457 | 0.396293417 |
| cg23532300 | LOC100270746;C6orf41          | 4.34E-05    | 0.396273215 |
| cg15612945 | VPS54;VPS54                   | 2.58E-05    | 0.396267782 |
| cg07294406 |                               | 9.24E-05    | 0.396264445 |
| cg19522511 |                               | 0.00043997  | 0.396261244 |
| cg22946150 | SH3GL3;SH3GL3;SH3GL3          | 3.34E-05    | 0.396247785 |
| cg14213590 | GPST1                         | 2.58E-05    | 0.396217684 |
| cg20107395 | DOK5;DOK5                     | 0.000290372 | 0.396214369 |
| cg05694245 | MKX                           | 1.50E-05    | 0.396211883 |
| cg07099161 | RAX                           | 1.11E-05    | 0.396210125 |
| cg04182865 | RNF14                         | 4.34E-05    | 0.396203948 |
| cg17605476 | GRIA2;GRIA2;GRIA2             | 1.50E-05    | 0.396183633 |
| cg14439622 | GATA6                         | 3.34E-05    | 0.396177944 |
| cg08217124 | NKX2-5;NKX2-5;NKX2-5          | 5.59E-05    | 0.396177629 |
| cg26469608 |                               | 2.58E-05    | 0.39617594  |
| cg05919360 | DAB1                          | 4.34E-05    | 0.396173282 |
| cg03699843 | SNX20;SNX20                   | 0.000791389 | 0.396165283 |
| cg21174746 | CTNND2                        | 7.23E-05    | 0.396164606 |
| cg22970357 | EN1                           | 1.50E-05    | 0.396164014 |
| cg08658621 | DPYSL4                        | 4.34E-05    | 0.396133677 |
| cg18121003 | CCDC81;CCDC81                 | 0.000290372 | 0.39611616  |
| cg23338668 |                               | 8.60E-06    | 0.396105642 |
| cg00688963 | THRB;THRB;THRB;THRB;THRB;THRB | 0.002304201 | 0.396096343 |

|            |                                       |             |             |
|------------|---------------------------------------|-------------|-------------|
| cg11941920 |                                       | 3.34E-05    | 0.396087102 |
| cg09125430 | KCNJ8                                 | 4.34E-05    | 0.396081629 |
| cg07131533 | KCNN2                                 | 8.60E-06    | 0.396081296 |
| cg23003783 | GRM6;GRM6                             | 8.60E-06    | 0.396080854 |
| cg10804656 |                                       | 5.59E-05    | 0.39601787  |
| cg26130488 |                                       | 0.000117986 | 0.396006836 |
| cg11296759 | CD163L1                               | 8.60E-06    | 0.396003545 |
| cg12265623 | NXPH1                                 | 4.34E-05    | 0.395974807 |
| cg19649900 | SBNO2                                 | 1.96E-05    | 0.395971535 |
| cg10366797 | HOXC4                                 | 8.60E-06    | 0.395955399 |
| cg20934416 |                                       | 0.000187194 | 0.395913901 |
| cg21200703 | SLC34A2                               | 1.50E-05    | 0.395913677 |
| cg27169020 | BNC1                                  | 2.58E-05    | 0.395913482 |
| cg15610437 | AZU1                                  | 1.50E-05    | 0.395911056 |
| cg01589129 |                                       | 0.000187194 | 0.395883374 |
| cg16927040 | SST;SST                               | 5.59E-05    | 0.395878809 |
| cg26033349 | ZSWIM2                                | 2.58E-05    | 0.395875818 |
| cg13359415 | LGI2                                  | 0.000290372 | 0.395849386 |
| cg24500630 |                                       | 0.000117986 | 0.395847827 |
| cg05641882 | CXCL3                                 | 2.58E-05    | 0.395841839 |
| cg14946389 | GPC6                                  | 3.34E-05    | 0.395841169 |
| cg21816308 |                                       | 4.34E-05    | 0.395829801 |
| cg13649056 |                                       | 8.60E-06    | 0.395822712 |
| cg17370272 | UQCRFS1                               | 4.34E-05    | 0.395786846 |
| cg19311153 | MARVELD3;MARVELD3                     | 2.58E-05    | 0.395759707 |
| cg02842496 | ADCY8                                 | 1.50E-05    | 0.395757841 |
| cg01141812 | CLVS2                                 | 2.58E-05    | 0.395734667 |
| cg06275859 |                                       | 1.50E-05    | 0.395718902 |
| cg07749597 |                                       | 0.000117986 | 0.395716153 |
| cg16387467 | CNDP2;CNDP2                           | 0.001639597 | 0.395706118 |
| cg18329187 | CKB                                   | 0.002714607 | 0.395677601 |
| cg20158867 | DLC1;DLC1                             | 0.000187194 | 0.395674669 |
| cg02249292 | MKX                                   | 1.11E-05    | 0.395666254 |
| cg14679587 | GLS2                                  | 9.24E-05    | 0.395663524 |
| cg02996869 | LPHN2                                 | 4.34E-05    | 0.395655607 |
| cg15301316 |                                       | 5.59E-05    | 0.395649756 |
| cg12748332 | MPPED2                                | 0.000955793 | 0.395635253 |
| cg08073882 | JAKMIP1;JAKMIP1                       | 0.005897668 | 0.395603766 |
| cg09128567 | ECHDC2                                | 0.000187194 | 0.395581645 |
| cg08570521 | TLL1;TLL1                             | 5.59E-05    | 0.39557567  |
| cg07142201 | C11orf87                              | 7.23E-05    | 0.395572095 |
| cg10758306 | OVOL2                                 | 3.34E-05    | 0.395563309 |
| cg24024056 |                                       | 0.000290372 | 0.395557903 |
| cg04303509 | ZNF792                                | 0.000791389 | 0.395504396 |
| cg00425918 | NKX2-6                                | 1.11E-05    | 0.395498812 |
| cg11308643 | GRIA4;GRIA4;GRIA4;GRIA4               | 1.96E-05    | 0.395487593 |
| cg16319691 | USH1C;USH1C                           | 7.23E-05    | 0.395479373 |
| cg23818621 | CSMD1                                 | 3.34E-05    | 0.395476331 |
| cg11846956 | KLK10;KLK10;KLK10                     | 2.58E-05    | 0.395476029 |
| cg17598466 |                                       | 0.000187194 | 0.395467479 |
| cg12064372 |                                       | 9.24E-05    | 0.395467253 |
| cg21255942 |                                       | 0.000290372 | 0.395458456 |
| cg10600178 | RUNDC3B;RUNDC3B;RUNDC3B;ABCB1;RUNDC3B | 7.23E-05    | 0.395447841 |
| cg00791253 | KSR2                                  | 0.000233422 | 0.395437229 |
| cg05162166 |                                       | 9.24E-05    | 0.395429437 |
| cg01573562 | RPH3A;RPH3A                           | 1.96E-05    | 0.395407092 |
| cg27545615 | PFKFB3;PFKFB3                         | 0.000955793 | 0.395407054 |
| cg04107140 | ADRA2C                                | 0.000791389 | 0.395402581 |
| cg17807528 | EIF5A2                                | 0.000148457 | 0.395384618 |
| cg22807449 | HOXB2                                 | 0.000117986 | 0.39536455  |

|            |                                    |             |             |
|------------|------------------------------------|-------------|-------------|
| cg26389950 | PCDHB16                            | 3.34E-05    | 0.395351851 |
| cg16633901 |                                    | 0.001147425 | 0.395347312 |
| cg14410016 | HOXD9                              | 1.11E-05    | 0.395347045 |
| cg16056105 | INSM2                              | 0.000148457 | 0.395298494 |
| cg03266453 | EN1                                | 4.34E-05    | 0.39529437  |
| cg21515785 | FAM174A                            | 2.58E-05    | 0.395291681 |
| cg15232894 | NOVA2                              | 8.60E-06    | 0.3952519   |
| cg02162880 | TFAP2A                             | 1.50E-05    | 0.395238669 |
| cg21678461 | DBX1                               | 9.24E-05    | 0.395236394 |
| cg16378063 |                                    | 0.000357885 | 0.395231792 |
| cg06653898 |                                    | 5.59E-05    | 0.395222723 |
| cg14776321 | NCRNA00202                         | 1.11E-05    | 0.395216141 |
| cg12348202 | PTPRN2;PTPRN2;PTPRN2               | 1.50E-05    | 0.395191037 |
| cg24430580 | PITX2;PITX2;PITX2;PITX2            | 3.34E-05    | 0.395185162 |
| cg20303399 | ADRA1A;ADRA1A;ADRA1A;ADRA1A        | 8.60E-06    | 0.395171601 |
| cg14414464 |                                    | 1.11E-05    | 0.395165632 |
| cg13227806 |                                    | 7.23E-05    | 0.395131932 |
| cg25928819 |                                    | 1.11E-05    | 0.395124535 |
| cg02235249 | LOC440925                          | 1.50E-05    | 0.395098375 |
| cg21326139 | MAEA;MAEA                          | 4.34E-05    | 0.395098164 |
| cg21426759 | TRIM39;TRIM39                      | 1.50E-05    | 0.395083255 |
| cg14009098 | SLC35F3                            | 1.50E-05    | 0.395055165 |
| cg17942121 | SIM1                               | 8.60E-06    | 0.395040673 |
| cg08949408 | C1QL3                              | 1.96E-05    | 0.395036807 |
| cg15516558 | DEDD;DEDD;DEDD                     | 2.58E-05    | 0.395006831 |
| cg08472633 | GALNS                              | 1.11E-05    | 0.394997916 |
| cg21762728 | C6orf70                            | 4.34E-05    | 0.394993252 |
| cg02207200 | SLC7A2                             | 5.59E-05    | 0.394979429 |
| cg11869770 | WTIP                               | 5.59E-05    | 0.394951987 |
| cg00024086 |                                    | 4.34E-05    | 0.394899879 |
| cg21009965 | LHX8                               | 8.60E-06    | 0.394879807 |
| cg05299793 | KCNH5;KCNH5;KCNH5                  | 8.60E-06    | 0.394874989 |
| cg06659338 | C1orf83                            | 1.50E-05    | 0.394857309 |
| cg15966610 | IL7                                | 4.34E-05    | 0.394856429 |
| cg16329650 | ERBB4;ERBB4                        | 0.000262362 | 0.394839534 |
| cg03226000 | SLC6A2                             | 3.34E-05    | 0.394816695 |
| cg23582644 | SERPINB2;SERPINB2                  | 1.11E-05    | 0.394810869 |
| cg20117153 |                                    | 2.58E-05    | 0.394801065 |
| cg02221302 | C3orf14                            | 1.96E-05    | 0.394799507 |
| cg08465346 | HOXC4                              | 0.000357885 | 0.394799414 |
| cg14411873 | GABRA2;GABRA2                      | 1.96E-05    | 0.394794644 |
| cg15506609 | HOXA9                              | 0.001376172 | 0.394792912 |
| cg16389399 |                                    | 8.60E-06    | 0.394792775 |
| cg17313269 | TRIM38                             | 7.23E-05    | 0.394778171 |
| cg16622906 | PCDHB6                             | 0.000791389 | 0.394760356 |
| cg12865675 | CANX;CANX                          | 5.59E-05    | 0.394757541 |
| cg23718606 | PRSS16                             | 8.60E-06    | 0.394746702 |
| cg00065905 | NHLH2;NHLH2                        | 7.23E-05    | 0.394731888 |
| cg04272011 | NRXN3;NRXN3;NRXN3;NRXN3;NRXN3      | 7.23E-05    | 0.394725025 |
| cg24410255 |                                    | 1.11E-05    | 0.394717198 |
| cg20340866 |                                    | 7.23E-05    | 0.394695782 |
| cg24660670 |                                    | 1.96E-05    | 0.394689933 |
| cg07055315 | NLRC4                              | 0.000117986 | 0.394687915 |
| cg05210258 | FGF14;FGF14                        | 1.11E-05    | 0.394681247 |
| cg14131824 | SLC43A2                            | 0.000117986 | 0.394678123 |
| cg03351487 | STK39                              | 1.50E-05    | 0.394675672 |
| cg06739107 | LPP;LPP;LPP                        | 0.000148457 | 0.394674108 |
| cg01780493 | SEMA3C                             | 0.000187194 | 0.394662437 |
| cg26282566 | PCDHA2;PCDHA1;PCDHA1;PCDHA4;PCDHA3 | 0.000187194 | 0.394650953 |
| cg10930308 | RNF39;RNF39                        | 0.000290372 | 0.394642458 |



|            |                                       |             |             |
|------------|---------------------------------------|-------------|-------------|
| cg19526659 |                                       | 1.50E-05    | 0.39461803  |
| cg10241484 | CDH8                                  | 1.11E-05    | 0.394609741 |
| cg27264049 |                                       | 4.34E-05    | 0.394603031 |
| cg18765366 | DOC2B                                 | 0.000187194 | 0.394600319 |
| cg12217400 |                                       | 4.34E-05    | 0.39458924  |
| cg06545389 | CCDC108;CCDC108                       | 7.23E-05    | 0.394580359 |
| cg24084422 | HSPA4L                                | 3.34E-05    | 0.394575204 |
| cg19069553 | ANXA3                                 | 1.50E-05    | 0.394574549 |
| cg15454726 |                                       | 0.000187194 | 0.394558595 |
| cg22519422 |                                       | 2.58E-05    | 0.39452746  |
| cg17270257 | PDE10A;PDE10A                         | 9.24E-05    | 0.394526352 |
| cg14041283 |                                       | 2.58E-05    | 0.394495585 |
| cg09099868 |                                       | 0.000187194 | 0.394489954 |
| cg06329574 | FGF3                                  | 2.58E-05    | 0.394467706 |
| cg10094651 | IGFBP3;IGFBP3                         | 0.001061731 | 0.394459864 |
| cg14503291 | FAM117A                               | 0.005897668 | 0.394458897 |
| cg23153481 |                                       | 0.000791389 | 0.394445693 |
| cg01655008 | C14orf109;C14orf109                   | 7.23E-05    | 0.394443311 |
| cg03349020 | FBXL16                                | 5.59E-05    | 0.394436149 |
| cg16660547 | VTI1A                                 | 3.21E-05    | 0.394428675 |
| cg17525102 | FOXG1                                 | 3.34E-05    | 0.394417412 |
| cg24737761 |                                       | 4.34E-05    | 0.394305633 |
| cg11324832 | SOX2OT                                | 2.58E-05    | 0.394275936 |
| cg25203962 |                                       | 8.60E-06    | 0.394272149 |
| cg12431517 |                                       | 0.000187194 | 0.394271089 |
| cg05323533 | PHOX2B                                | 0.000187194 | 0.394256206 |
| cg15876676 |                                       | 0.000148457 | 0.394250968 |
| cg14448830 |                                       | 9.24E-05    | 0.394237138 |
| cg08752433 | PPTC7                                 | 0.000187194 | 0.394223293 |
| cg26157386 |                                       | 1.50E-05    | 0.394203714 |
| cg00614182 | NRG1                                  | 8.60E-06    | 0.394189356 |
| cg05542757 | FREM2                                 | 1.50E-05    | 0.394183449 |
| cg08086720 |                                       | 0.000117986 | 0.394180148 |
| cg01153166 | NR2F2;NR2F2;NR2F2;NR2F2               | 9.24E-05    | 0.39417496  |
| cg23752923 | MCOLN3                                | 8.60E-06    | 0.394174035 |
| cg19317211 |                                       | 0.000148457 | 0.394171164 |
| cg12091396 | C10orf35                              | 3.34E-05    | 0.394163375 |
| cg25725843 | ST6GAL2;ST6GAL2                       | 2.58E-05    | 0.394158144 |
| cg21339923 |                                       | 0.000233422 | 0.394155936 |
| cg12419052 | ZIC1                                  | 3.34E-05    | 0.394151247 |
| cg26994225 |                                       | 1.96E-05    | 0.394092075 |
| cg13411789 | GCNT2                                 | 0.000537905 | 0.394091681 |
| cg10462778 | ERGIC1                                | 3.34E-05    | 0.394071263 |
| cg02728558 | EIF5A2                                | 0.000290372 | 0.394064868 |
| cg20265733 | GATA5                                 | 0.000654035 | 0.394064545 |
| cg15205435 | CHD5                                  | 0.005897668 | 0.394063254 |
| cg20941110 | BNC1                                  | 1.50E-05    | 0.394061834 |
| cg15193473 | BIVM;BIVM                             | 0.000357885 | 0.394060864 |
| cg01980222 | TREM2;TREM2                           | 3.34E-05    | 0.394032805 |
| cg10000424 | WNT6                                  | 0.000357885 | 0.394011118 |
| cg14449051 | SLC6A15;SLC6A15;SLC6A15;SLC6A15;SLC6A | 8.60E-06    | 0.39400369  |
| cg14663451 | NRG1;NRG1;NRG1;NRG1;NRG1;NRG1;NRG1;   | 8.60E-06    | 0.39398949  |
| cg06562372 | ABCB1                                 | 2.58E-05    | 0.393989211 |
| cg26981076 | MS4A3;MS4A3;MS4A3;MS4A3;MS4A3;MS4A3   | 5.59E-05    | 0.393979159 |
| cg15548427 | MFSD1;MFSD1                           | 0.003189589 | 0.393956755 |
| cg13682477 | TTPA                                  | 9.04E-05    | 0.39395512  |
| cg22807585 |                                       | 0.000233422 | 0.393925071 |
| cg04562589 |                                       | 1.11E-05    | 0.393921343 |
| cg19163194 | CACNG4                                | 5.59E-05    | 0.393918891 |
| cg18888137 | BRD2;BRD2                             | 1.96E-05    | 0.393916764 |

|            |                                         |             |             |
|------------|-----------------------------------------|-------------|-------------|
| cg20963227 |                                         | 5.59E-05    | 0.393916073 |
| cg26107850 | HIST3H2BB;HIST3H2A                      | 1.96E-05    | 0.393915947 |
| cg15312264 | TBPL2                                   | 9.24E-05    | 0.393915015 |
| cg13675051 | RNF19A;RNF19A                           | 5.59E-05    | 0.393877637 |
| cg00969119 |                                         | 7.23E-05    | 0.39386951  |
| cg05870586 | HDAC4                                   | 4.34E-05    | 0.393864354 |
| cg10659805 | DLX6AS                                  | 0.000117986 | 0.393847153 |
| cg25463470 | SOX1                                    | 0.000654035 | 0.393828772 |
| cg01050423 | SLC9A2                                  | 0.000187194 | 0.393817626 |
| cg08008931 | NRXN1;NRXN1;NRXN1;NRXN1                 | 7.23E-05    | 0.393813415 |
| cg02770534 | PAX2;PAX2;PAX2;PAX2;PAX2                | 2.58E-05    | 0.393805652 |
| cg23210971 | AFF1;AFF1                               | 4.34E-05    | 0.393801316 |
| cg04747322 | SNCAIP                                  | 1.50E-05    | 0.393801192 |
| cg06658468 | OTOP1                                   | 4.34E-05    | 0.393775052 |
| cg25977958 | SYNE1;SYNE1                             | 5.59E-05    | 0.393734426 |
| cg24825966 | RFX4                                    | 7.23E-05    | 0.39372056  |
| cg21231400 |                                         | 3.34E-05    | 0.393692695 |
| cg20192747 |                                         | 1.11E-05    | 0.393671338 |
| cg26707845 | ODZ4                                    | 4.34E-05    | 0.393659632 |
| cg00297075 |                                         | 2.58E-05    | 0.393646276 |
| cg19969733 | IL1RL1                                  | 0.001639597 | 0.393632432 |
| cg07045816 | IHH                                     | 0.000158823 | 0.393619354 |
| cg10331779 | CTNND2                                  | 1.11E-05    | 0.393610114 |
| cg12393697 | FAM171B                                 | 0.000148457 | 0.393608919 |
| cg26209058 | EIF5A2                                  | 7.23E-05    | 0.393596435 |
| cg09926747 | COL25A1;COL25A1                         | 1.11E-05    | 0.393556707 |
| cg12598803 | EIF5A2                                  | 9.24E-05    | 0.393545984 |
| cg14102128 | SEPT10;SEPT10;SEPT10;ANKRD57;SEPT10     | 4.34E-05    | 0.39354013  |
| cg08334899 | LOC401463                               | 3.92E-05    | 0.393527589 |
| cg05849676 | CLEC12B                                 | 0.001376172 | 0.393520335 |
| cg04086531 | ZNF423                                  | 1.96E-05    | 0.393501886 |
| cg25742246 |                                         | 3.34E-05    | 0.393468377 |
| cg25098208 | RIC3;RIC3                               | 1.60E-05    | 0.393465018 |
| cg10348756 | EPHX2;EPHX2                             | 1.96E-05    | 0.393459388 |
| cg11437253 |                                         | 8.60E-06    | 0.393456614 |
| cg20209308 | GSC2                                    | 1.96E-05    | 0.393411139 |
| cg26776551 | INTS6;INTS6                             | 4.34E-05    | 0.393373243 |
| cg12118843 |                                         | 0.000148457 | 0.393350301 |
| cg19736503 | RIPPLY2                                 | 8.60E-06    | 0.393340698 |
| cg13128937 |                                         | 2.58E-05    | 0.393338505 |
| cg04245373 | CALB2;CALB2;CALB2                       | 0.000187194 | 0.39330131  |
| cg20869501 | ESRRG;ESRRG;ESRRG;ESRRG;ESRRG           | 5.59E-05    | 0.393300422 |
| cg07180307 | C11orf87                                | 2.58E-05    | 0.393295572 |
| cg13890706 | GFRA1;GFRA1;GFRA1;GFRA1                 | 0.00043997  | 0.393295401 |
| cg24071532 | TMEM132E                                | 8.60E-06    | 0.393290066 |
| cg19929126 | TRIL                                    | 0.001147425 | 0.393286111 |
| cg13932501 | AUH                                     | 2.58E-05    | 0.393277964 |
| cg11215976 | ACTN2;ACTN2                             | 0.000117986 | 0.393224302 |
| cg00777445 |                                         | 1.50E-05    | 0.39322061  |
| cg18351939 |                                         | 5.59E-05    | 0.393211186 |
| cg14350197 | BRUNOL4;BRUNOL4;BRUNOL4;BRUNOL4         | 0.000117986 | 0.39318268  |
| cg10536898 |                                         | 2.58E-05    | 0.393170334 |
| cg19523213 | KCNJ8                                   | 0.000537905 | 0.393153226 |
| cg07362969 | TTPA                                    | 7.23E-05    | 0.39312401  |
| cg23989963 | BNC1                                    | 3.34E-05    | 0.393107671 |
| cg00387704 | LEPREL1;LEPREL1                         | 1.50E-05    | 0.393098734 |
| cg13852284 | C10orf11                                | 0.000148457 | 0.393097437 |
| cg00911351 | PCDHGA4;PCDHGA6;PCDHGA1;PCDHGA5;PCDHGA5 | 1.96E-05    | 0.393093611 |
| cg06644373 | SATB2                                   | 0.000654035 | 0.3930796   |
| cg19412031 |                                         | 0.000233422 | 0.393077105 |

|            |                                       |             |             |
|------------|---------------------------------------|-------------|-------------|
| cg26330518 | NEFM                                  | 0.000117986 | 0.393067475 |
| cg02811232 |                                       | 0.00043997  | 0.393064728 |
| cg22481695 |                                       | 0.000233422 | 0.393009669 |
| cg26069919 |                                       | 1.50E-05    | 0.393001288 |
| cg22648135 | PCDHGA4;PCDHGA6;PCDHGA1;PCDHGA5;PC    | 1.96E-05    | 0.392988287 |
| cg01501819 | KCNA7                                 | 9.24E-05    | 0.392964275 |
| cg01054402 | TGOLN2                                | 0.000290372 | 0.392956155 |
| cg14265823 | PAX3;PAX3;CCDC140;PAX3;PAX3;PAX3;PAX3 | 2.58E-05    | 0.392951619 |
| cg20917891 | DCC                                   | 8.60E-06    | 0.392931982 |
| cg07077013 |                                       | 8.60E-06    | 0.392931561 |
| cg03202564 |                                       | 8.60E-06    | 0.392920139 |
| cg19977966 | HOXC13                                | 1.18E-05    | 0.392868033 |
| cg03506028 |                                       | 1.11E-05    | 0.392825613 |
| cg05674602 |                                       | 1.96E-05    | 0.392822304 |
| cg26198463 | TRPA1;TRPA1                           | 8.60E-06    | 0.392813818 |
| cg08755224 |                                       | 8.60E-06    | 0.392802143 |
| cg15240082 | UPK3A;UPK3A                           | 0.000791389 | 0.392788963 |
| cg22687807 | LYNX1;LYNX1;LYNX1;LYNX1               | 0.000233422 | 0.392788256 |
| cg06920037 |                                       | 1.96E-05    | 0.392756381 |
| cg09257796 | GABRG3                                | 0.000148457 | 0.392716497 |
| cg14809191 | FOXQ1                                 | 8.60E-06    | 0.392701047 |
| cg09887220 |                                       | 1.50E-05    | 0.392691837 |
| cg11691561 |                                       | 5.59E-05    | 0.392678336 |
| cg02111032 |                                       | 2.58E-05    | 0.392666402 |
| cg20439889 | CHST8;CHST8;CHST8;CHST8               | 8.60E-06    | 0.392639711 |
| cg14547461 | KIAA0146                              | 1.96E-05    | 0.392628324 |
| cg05520409 | SOX8                                  | 4.34E-05    | 0.392626983 |
| cg02707176 | PCDHGA4;PCDHGA9;PCDHGA1;PCDHGB1;PC    | 0.000148457 | 0.392621176 |
| cg03943081 | TCERG1L                               | 8.60E-06    | 0.392614805 |
| cg22331862 | SLC6A11                               | 8.60E-06    | 0.392606918 |
| cg14426785 | TGFBR1;TGFBR1                         | 2.58E-05    | 0.392602423 |
| cg13348877 | PARD6G;PARD6G                         | 0.006823935 | 0.392587558 |
| cg24074033 | DBX1                                  | 5.59E-05    | 0.392584758 |
| cg02078690 | BSX                                   | 0.000148457 | 0.392561472 |
| cg01882866 |                                       | 3.34E-05    | 0.392558005 |
| cg00764612 | C1orf51                               | 1.11E-05    | 0.392557955 |
| cg19584136 | MXI1;MXI1                             | 1.96E-05    | 0.392530703 |
| cg11639615 |                                       | 0.000187194 | 0.39252697  |
| cg12122146 | TMEM132D                              | 5.59E-05    | 0.392521781 |
| cg03534058 | CDC14B;CDC14B                         | 4.34E-05    | 0.392508396 |
| cg07116712 |                                       | 0.00043997  | 0.392466831 |
| cg06733419 | TBX18                                 | 1.11E-05    | 0.39244585  |
| cg14243481 | SYT9                                  | 7.23E-05    | 0.392441833 |
| cg21314480 | TACR1;TACR1                           | 7.23E-05    | 0.392432086 |
| cg04568492 | ACTA1                                 | 7.23E-05    | 0.392423084 |
| cg21700214 | CNDP1                                 | 1.50E-05    | 0.39241957  |
| cg09157302 | SLC34A2                               | 0.000537905 | 0.392408334 |
| cg24468070 | CDC42EP5                              | 0.000148457 | 0.392402334 |
| cg11867257 | GPR98;GPR98                           | 9.24E-05    | 0.392391121 |
| cg15056773 | SYNPR                                 | 9.24E-05    | 0.392382912 |
| cg16475721 |                                       | 2.58E-05    | 0.392377292 |
| cg08356262 | IQGAP2                                | 0.001147425 | 0.392364696 |
| cg05756933 | GPR6                                  | 1.50E-05    | 0.392353501 |
| cg24099067 |                                       | 1.11E-05    | 0.392352515 |
| cg26583481 | CALY                                  | 0.000187194 | 0.392350445 |
| cg13384781 |                                       | 2.58E-05    | 0.392346092 |
| cg02657836 |                                       | 1.50E-05    | 0.392303097 |
| cg17312004 |                                       | 3.34E-05    | 0.392299882 |
| cg24458474 | GRID1                                 | 0.000148457 | 0.392297066 |
| cg06680852 |                                       | 0.00043997  | 0.392288469 |

|            |                                    |             |             |
|------------|------------------------------------|-------------|-------------|
| cg08053686 |                                    | 1.96E-05    | 0.392278822 |
| cg09988853 | KCNC3                              | 0.000205664 | 0.392266553 |
| cg04549162 | GPR26                              | 8.60E-06    | 0.392256275 |
| cg19161124 | DPP6                               | 1.11E-05    | 0.392249118 |
| cg09990962 | PRDM16;PRDM16                      | 0.000233422 | 0.392212944 |
| cg12249234 | KSR1                               | 0.000148457 | 0.392172762 |
| cg26998274 | SLITRK1;SLITRK1                    | 0.000148457 | 0.392091365 |
| cg11710969 | ARMC3                              | 1.50E-05    | 0.392090308 |
| cg02480199 |                                    | 2.58E-05    | 0.392079141 |
| cg16786808 | EPHA4                              | 0.000233422 | 0.392064129 |
| cg19144684 |                                    | 9.24E-05    | 0.392044239 |
| cg03440799 | C1orf125;C1orf125                  | 3.34E-05    | 0.392042665 |
| cg13409645 | COX6B2                             | 0.000148457 | 0.392001403 |
| cg00154357 | ZIC4;ZIC4;ZIC4;ZIC4;ZIC4           | 8.60E-06    | 0.391998665 |
| cg08283882 | EBF2                               | 0.000357885 | 0.39199665  |
| cg22105145 | LOC642597                          | 1.11E-05    | 0.391984762 |
| cg10176110 | SMOC2;SMOC2                        | 0.000233422 | 0.39196868  |
| cg02562740 | SLC19A3                            | 1.11E-05    | 0.39196661  |
| cg08874512 | IGLON5                             | 8.60E-06    | 0.391962478 |
| cg27096144 | MSX2                               | 8.60E-06    | 0.391953178 |
| cg05335886 | TMC5;TMC5                          | 1.50E-05    | 0.391945334 |
| cg17294725 | UNCX                               | 3.34E-05    | 0.391940809 |
| cg27468145 | AQP4;AQP4                          | 2.58E-05    | 0.391940307 |
| cg26929700 | ZNF423                             | 7.23E-05    | 0.391936406 |
| cg03486986 |                                    | 0.000117986 | 0.391919887 |
| cg03076319 | MLPH;MLPH                          | 4.34E-05    | 0.391914329 |
| cg14597534 |                                    | 9.24E-05    | 0.391914022 |
| cg12317601 | EMX2;EMX2OS;EMX2                   | 0.000117986 | 0.391895734 |
| cg26187205 |                                    | 0.000791389 | 0.391886167 |
| cg18876826 | INPP5B                             | 0.000187194 | 0.391880579 |
| cg14912728 | PMP22;PMP22;PMP22                  | 0.000290372 | 0.39187292  |
| cg01563031 | NELL1;NELL1                        | 0.001147425 | 0.391853852 |
| cg12276123 | KCNJ3;KCNJ3                        | 5.59E-05    | 0.391840236 |
| cg08480223 | LIN7A                              | 3.34E-05    | 0.391833277 |
| cg12700145 |                                    | 0.000148457 | 0.391818369 |
| cg11612786 |                                    | 1.11E-05    | 0.391798172 |
| cg20672711 |                                    | 7.94E-05    | 0.39178157  |
| cg21213973 |                                    | 0.000290372 | 0.391775851 |
| cg04645914 |                                    | 4.34E-05    | 0.391755634 |
| cg18308184 | KCNIP4;KCNIP4                      | 1.50E-05    | 0.391729356 |
| cg25771677 |                                    | 7.23E-05    | 0.391728678 |
| cg11231249 | CTNNA2;LRRTM1;CTNNA2               | 3.21E-05    | 0.391710129 |
| cg00670915 | RPL31;RPL31;RPL31                  | 8.60E-06    | 0.391707772 |
| cg10201297 | ZBTB8B                             | 8.60E-06    | 0.391686882 |
| cg22891988 | MPPED2                             | 0.000187194 | 0.391654967 |
| cg08873805 | ZSCAN18;ZSCAN18                    | 0.000187194 | 0.391636492 |
| cg14940260 |                                    | 3.34E-05    | 0.391615378 |
| cg10063179 | MTNR1A                             | 8.60E-06    | 0.391607058 |
| cg17847723 |                                    | 5.59E-05    | 0.391571235 |
| cg02601475 |                                    | 1.50E-05    | 0.391569992 |
| cg08697503 | CCDC140                            | 1.11E-05    | 0.391566764 |
| cg16998950 | ELL2                               | 0.000290372 | 0.39153932  |
| cg15927196 | PON3                               | 2.58E-05    | 0.391530048 |
| cg09768093 | ZBTB8B                             | 1.50E-05    | 0.391527166 |
| cg25333258 | CAMK2B;CAMK2B;CAMK2B;CAMK2B;CAMK2B | 0.00043997  | 0.391523525 |
| cg20274950 |                                    | 0.002304201 | 0.391523179 |
| cg19157034 |                                    | 7.23E-05    | 0.391521999 |
| cg05897809 |                                    | 1.50E-05    | 0.391482609 |
| cg18190187 | DRD1                               | 7.23E-05    | 0.391468709 |
| cg27391267 | ZSCAN1                             | 2.58E-05    | 0.391463069 |

|            |                                     |             |             |
|------------|-------------------------------------|-------------|-------------|
| cg07714657 | WNT6                                | 0.000654035 | 0.391454504 |
| cg14492293 | LHX3;LHX3                           | 7.23E-05    | 0.391449266 |
| cg22509539 |                                     | 8.60E-06    | 0.391443524 |
| cg21282131 | MAP7                                | 0.001147425 | 0.391442234 |
| cg21649051 | MCOLN3                              | 7.23E-05    | 0.391438782 |
| cg06758255 | TOX3;TOX3                           | 0.004357816 | 0.391432822 |
| cg08292023 | GRM5;GRM5                           | 3.34E-05    | 0.39143029  |
| cg00323305 | THRB;THRB;THRB                      | 0.002304201 | 0.391417487 |
| cg07769015 | SLC45A4                             | 1.50E-05    | 0.391412234 |
| cg08773226 |                                     | 3.34E-05    | 0.391389089 |
| cg00333154 |                                     | 0.000233422 | 0.391375692 |
| cg26679004 | GRID1                               | 4.34E-05    | 0.391349827 |
| cg10074544 | COL25A1;COL25A1;COL25A1;COL25A1     | 8.60E-06    | 0.391343164 |
| cg15025103 |                                     | 0.00043997  | 0.391320052 |
| cg18839637 | PCDHGA2;PCDHGA3;PCDHGA3;PCDHGA1     | 1.11E-05    | 0.391314264 |
| cg13481132 | KCNT1                               | 0.000290372 | 0.391304498 |
| cg26254045 | SPRED3                              | 8.60E-06    | 0.391276854 |
| cg16142855 |                                     | 0.000117986 | 0.391258348 |
| cg27021357 | SH3GL3;SH3GL3                       | 8.60E-06    | 0.391255691 |
| cg02467990 | VWC2                                | 0.002304201 | 0.39124212  |
| cg05726764 | USP13                               | 1.11E-05    | 0.391236261 |
| cg00841693 | MNX1;MNX1;MNX1                      | 1.96E-05    | 0.391234802 |
| cg03710481 | PKIB;PKIB;PKIB;PKIB;PKIB            | 0.000187194 | 0.391233903 |
| cg18888464 |                                     | 2.58E-05    | 0.391222021 |
| cg13323701 | SLC35F1                             | 1.11E-05    | 0.391210959 |
| cg27090062 |                                     | 0.000654035 | 0.391199513 |
| cg07962392 | DSCAM                               | 1.50E-05    | 0.391177238 |
| cg05085230 | EYA4;EYA4;EYA4                      | 0.000233422 | 0.391165582 |
| cg23258615 | ANXA11;ANXA11;ANXA11                | 2.58E-05    | 0.391163317 |
| cg02923706 |                                     | 8.60E-06    | 0.391156591 |
| cg12547959 | TRIO                                | 3.34E-05    | 0.391142165 |
| cg02327997 | ADAM12;ADAM12                       | 8.60E-06    | 0.39114067  |
| cg02540477 | SMOC2;SMOC2;SMOC2;SMOC2             | 0.000290372 | 0.391129089 |
| cg11723848 | UNC5C                               | 0.000233422 | 0.391113177 |
| cg02943604 | PPAPDC1A                            | 1.11E-05    | 0.391090617 |
| cg06314761 | SYNPR                               | 1.96E-05    | 0.391088751 |
| cg01081737 | SLC45A4                             | 0.000187194 | 0.391086175 |
| cg14385245 | BNC1                                | 2.58E-05    | 0.391083005 |
| cg04661457 |                                     | 0.000233422 | 0.391082117 |
| cg20059140 | GNAL;GNAL;GNAL                      | 3.34E-05    | 0.391070063 |
| cg16579438 | THRB;THRB;THRB                      | 0.000537905 | 0.391061316 |
| cg07185131 |                                     | 0.00043997  | 0.391038533 |
| cg18944010 | TBX15                               | 1.96E-05    | 0.391003702 |
| cg25057743 | PTH2R                               | 8.60E-06    | 0.390962121 |
| cg07605211 | SUSD4;SUSD4                         | 0.000187194 | 0.390957263 |
| cg01609420 |                                     | 1.96E-05    | 0.390950303 |
| cg22350070 | CTNNA2;CTNNA2                       | 0.000290372 | 0.390937031 |
| cg09809932 | ESPN                                | 0.000357885 | 0.390927782 |
| cg15159605 | LHX5                                | 0.00045851  | 0.390927765 |
| cg24778248 | CNGA3;CNGA3                         | 3.34E-05    | 0.390920787 |
| cg24005685 | PITX2;PITX2                         | 9.24E-05    | 0.390918257 |
| cg01617317 | MS4A3;MS4A3;MS4A3;MS4A3;MS4A3;MS4A3 | 5.59E-05    | 0.390877577 |
| cg22695532 |                                     | 2.58E-05    | 0.390870601 |
| cg09385093 |                                     | 0.000117986 | 0.390843857 |
| cg18505401 | TMEM196                             | 5.11E-05    | 0.390838023 |
| cg09010699 |                                     | 2.58E-05    | 0.390817417 |
| cg18097532 | ABCC8                               | 9.24E-05    | 0.39080913  |
| cg02520281 | PCDHB17                             | 1.50E-05    | 0.390806587 |
| cg21629500 | C5orf38                             | 0.005897668 | 0.390747606 |
| cg17398595 | SH3GL2                              | 4.34E-05    | 0.390697908 |

|            |                         |             |             |
|------------|-------------------------|-------------|-------------|
| cg06692537 | TMEM229A                | 1.96E-05    | 0.390695338 |
| cg22489321 |                         | 0.000537905 | 0.390683124 |
| cg01962428 | DKK2;DKK2               | 0.000526175 | 0.390663035 |
| cg16175713 | CYP39A1                 | 0.001147425 | 0.390659562 |
| cg25095722 | LRRN1                   | 0.000117986 | 0.390653097 |
| cg22316269 |                         | 0.000148457 | 0.390645569 |
| cg07122178 | SFRP1                   | 8.60E-06    | 0.390634735 |
| cg02717150 |                         | 0.000537905 | 0.390616729 |
| cg08080029 | CHD5                    | 0.000290372 | 0.390615476 |
| cg18612589 | CLDN7                   | 2.58E-05    | 0.390610768 |
| cg08765317 | WWC1;WWC1;WWC1          | 2.58E-05    | 0.390590719 |
| cg08230059 | TPBG;TPBG               | 0.000290372 | 0.390585028 |
| cg09883286 | USP44;USP44             | 7.23E-05    | 0.390577266 |
| cg18294707 | RNASE2                  | 7.23E-05    | 0.390562101 |
| cg00404641 | NUDT16P;NUDT16P         | 0.000148457 | 0.390552469 |
| cg07360792 | PRDM6                   | 0.000357885 | 0.390546805 |
| cg01922095 | LOC650226               | 1.96E-05    | 0.390518066 |
| cg26562772 | DUSP10;DUSP10;DUSP10    | 0.000187194 | 0.390509534 |
| cg26768712 | SCNN1B                  | 4.34E-05    | 0.39050614  |
| cg02970297 | DPY19L2P2;DPY19L2P2     | 8.60E-06    | 0.390498268 |
| cg10878114 | SLC35F3                 | 0.000117986 | 0.390493248 |
| cg01913568 | RXRG;RXRG               | 0.000205664 | 0.390488297 |
| cg21726372 | PITX2;PITX2;PITX2       | 9.24E-05    | 0.390478893 |
| cg07136133 | PRR5L;PRR5L;PRR5L;PRR5L | 7.23E-05    | 0.390449168 |
| cg04789529 | DOCK5                   | 1.96E-05    | 0.390444439 |
| cg22117918 | SLC22A3                 | 7.23E-05    | 0.390439084 |
| cg18793404 |                         | 4.34E-05    | 0.390419978 |
| cg14227486 |                         | 1.50E-05    | 0.390415442 |
| cg13948082 | CYP26B1                 | 1.11E-05    | 0.3904131   |
| cg02269161 | SYT9                    | 1.96E-05    | 0.390398405 |
| cg11042561 |                         | 5.59E-05    | 0.390357832 |
| cg14346208 | PAMR1;PAMR1             | 4.34E-05    | 0.390349402 |
| cg05924485 |                         | 1.50E-05    | 0.390336205 |
| cg05699739 |                         | 0.000233422 | 0.390329907 |
| cg00986824 | KCNC2;KCNC2;KCNC2       | 1.96E-05    | 0.390314695 |
| cg13525837 | KCNV1                   | 1.50E-05    | 0.390304602 |
| cg13857354 |                         | 0.000537905 | 0.390300828 |
| cg19861138 | RPRM                    | 0.000148457 | 0.390300519 |
| cg26502666 | SPDYA;SPDYA             | 7.23E-05    | 0.390299754 |
| cg24293903 | ENTPD7                  | 0.000187194 | 0.390272779 |
| cg23016734 | ROBO2                   | 1.96E-05    | 0.390252162 |
| cg12091542 | CELSR3                  | 8.60E-06    | 0.390250068 |
| cg12743460 |                         | 2.58E-05    | 0.39024895  |
| cg13924432 |                         | 1.11E-05    | 0.390215975 |
| cg22378919 | TBX15                   | 2.58E-05    | 0.390213635 |
| cg07210669 | S100P                   | 0.000955793 | 0.390167087 |
| cg20498414 | RIMS4                   | 0.000187194 | 0.39016277  |
| cg04351049 | LMX1A                   | 0.000117986 | 0.390140753 |
| cg15431821 | KIAA1024                | 3.34E-05    | 0.390129856 |
| cg07676361 |                         | 0.000233422 | 0.390105679 |
| cg24708006 |                         | 8.60E-06    | 0.390105099 |
| cg10916569 | BNC2                    | 0.000117986 | 0.39007702  |
| cg07636117 |                         | 1.50E-05    | 0.390076338 |
| cg21856067 | MACROD2                 | 2.58E-05    | 0.390066613 |
| cg23260547 | PROX1                   | 0.00043997  | 0.390064937 |
| cg14732248 | FOXQ1                   | 8.60E-06    | 0.390030335 |
| cg21063722 | SIM1                    | 0.000654035 | 0.390026263 |
| cg03305017 |                         | 0.000537905 | 0.390013292 |
| cg13212435 |                         | 8.60E-06    | 0.39000233  |
| cg27648738 | SH3GL3;SH3GL3           | 0.000357885 | 0.389996895 |

|            |                          |             |             |
|------------|--------------------------|-------------|-------------|
| cg12954230 | ADAMTS17                 | 0.001948248 | 0.389976871 |
| cg07822928 | HCN2                     | 1.50E-05    | 0.389969202 |
| cg12969595 | TMEM98;TMEM98            | 8.60E-06    | 0.389961919 |
| cg23198559 | NPNT                     | 8.60E-06    | 0.389958619 |
| cg14264795 | TBX5;TBX5;TBX5           | 1.50E-05    | 0.389958301 |
| cg18263365 | SPOCK1                   | 1.96E-05    | 0.389901451 |
| cg00100800 | ZNF462                   | 0.004357816 | 0.389898149 |
| cg07561747 | KIF21B                   | 3.34E-05    | 0.389892473 |
| cg22823146 | EIF4E3;EIF4E3;GPR27      | 7.23E-05    | 0.389892394 |
| cg13012916 | SFTA3                    | 0.000233422 | 0.389890869 |
| cg10253847 | NKAPL                    | 0.000357885 | 0.389866264 |
| cg21174055 | LHX3                     | 0.000290372 | 0.389856521 |
| cg20208600 | TMEM216                  | 0.000233422 | 0.38985453  |
| cg06132283 |                          | 8.60E-06    | 0.389848296 |
| cg27216259 | FAM46A                   | 0.000955793 | 0.389838843 |
| cg14061619 | SH3BP4                   | 4.34E-05    | 0.389835695 |
| cg26170569 |                          | 7.23E-05    | 0.389820179 |
| cg07848601 | RANBP17                  | 1.96E-05    | 0.389814721 |
| cg27192248 |                          | 0.001376172 | 0.38979979  |
| cg17362052 | DKK2                     | 1.50E-05    | 0.389799235 |
| cg18991611 |                          | 0.003486652 | 0.389796305 |
| cg25201881 | SYT6                     | 0.000187194 | 0.389781979 |
| cg03204605 | AFAP1;AFAP1              | 0.000791389 | 0.389779809 |
| cg23500122 | GHSR;GHSR                | 5.59E-05    | 0.389778059 |
| cg01047586 |                          | 0.000117986 | 0.38977654  |
| cg00208967 | OLFM2                    | 0.000791389 | 0.389760155 |
| cg16472050 |                          | 9.24E-05    | 0.389759577 |
| cg27635069 | NGF                      | 3.34E-05    | 0.389747556 |
| cg23130131 | PITX2;PITX2;PITX2        | 3.34E-05    | 0.389746999 |
| cg18567682 |                          | 0.000117986 | 0.389739182 |
| cg08625556 |                          | 0.000117986 | 0.389710389 |
| cg01582980 | SP8;SP8                  | 0.000290372 | 0.38967858  |
| cg23389465 |                          | 5.59E-05    | 0.389663498 |
| cg23508667 |                          | 0.000117986 | 0.389650011 |
| cg07777349 |                          | 0.000537905 | 0.389643478 |
| cg09157668 | KIAA1239                 | 3.34E-05    | 0.389638814 |
| cg26790247 | ZIC4;ZIC4;ZIC4;ZIC4;ZIC4 | 3.34E-05    | 0.389636907 |
| cg07741016 | VTRNA1-3                 | 9.24E-05    | 0.389633279 |
| cg03166753 |                          | 0.000205664 | 0.389610952 |
| cg09341793 | ASB2                     | 0.004357816 | 0.389595382 |
| cg24575676 | ZNF385B;MIR1258;ZNF385B  | 9.24E-05    | 0.389591351 |
| cg22090773 | NCAN                     | 8.60E-06    | 0.389558067 |
| cg17039391 | DKK3;DKK3;DKK3           | 0.000187194 | 0.389550602 |
| cg22643811 | FAM19A5                  | 8.60E-06    | 0.389539993 |
| cg05495949 | RADIL                    | 7.23E-05    | 0.389508484 |
| cg04080282 | PON3                     | 4.34E-05    | 0.389507764 |
| cg00059225 | GLRA1;GLRA1;GLRA1;GLRA1  | 1.11E-05    | 0.389486186 |
| cg00908526 | CTNND2;CTNND2            | 2.58E-05    | 0.38947189  |
| cg25701418 | MAGI1;MAGI1;MAGI1        | 0.000233422 | 0.389447056 |
| cg03736795 |                          | 0.000148457 | 0.389439533 |
| cg09617579 | FAM181B;FAM181B          | 0.000357885 | 0.38941764  |
| cg03925294 |                          | 8.60E-06    | 0.38938318  |
| cg18956933 |                          | 0.000148457 | 0.389373626 |
| cg17444904 | PRR15                    | 0.00043997  | 0.389372227 |
| cg04890607 | HMGA2;HMGA2              | 1.96E-05    | 0.389342942 |
| cg03223072 | ABLIM1;ABLIM1;ABLIM1     | 1.11E-05    | 0.389319496 |
| cg19037107 | ACAD8                    | 3.34E-05    | 0.389264236 |
| cg10112017 |                          | 4.34E-05    | 0.389248794 |
| cg18160402 | SHISA6                   | 5.59E-05    | 0.389188657 |
| cg14489474 | ADCYAP1;ADCYAP1          | 8.60E-06    | 0.38918254  |

|            |                                    |             |             |
|------------|------------------------------------|-------------|-------------|
| cg25797887 | DLX6AS                             | 0.000117986 | 0.389178335 |
| cg11100804 | PCDHGA4;PCDHGA6;PCDHGA1;PCDHGA8;PC | 3.34E-05    | 0.389148376 |
| cg19678828 | CYYR1;CYYR1                        | 5.59E-05    | 0.389136652 |
| cg24856726 | ASCL4                              | 5.59E-05    | 0.389132823 |
| cg14563954 |                                    | 4.34E-05    | 0.389125521 |
| cg15287806 | ZMYND11;ZMYND11;ZMYND11            | 1.96E-05    | 0.389122142 |
| cg20350518 |                                    | 2.58E-05    | 0.389120766 |
| cg01963134 | CPNE8;CPNE8                        | 0.0050758   | 0.389119143 |
| cg10042106 | OTX2                               | 4.34E-05    | 0.38905517  |
| cg12878812 | SRRM4                              | 8.60E-06    | 0.389010804 |
| cg08913523 |                                    | 0.000148457 | 0.389006684 |
| cg10083898 |                                    | 1.50E-05    | 0.389004394 |
| cg04432319 | ISM1                               | 0.002304201 | 0.388984653 |
| cg15745900 | PREX2;PREX2                        | 7.23E-05    | 0.388981925 |
| cg02010481 | JAZF1                              | 0.000955793 | 0.388963524 |
| cg20977312 | STC2                               | 9.24E-05    | 0.38894966  |
| cg02119792 |                                    | 0.001639597 | 0.388936505 |
| cg02840109 | CDH2                               | 0.00041966  | 0.388934702 |
| cg02445447 | FHL2;FHL2;FHL2;FHL2;FHL2;FHL2      | 0.000117986 | 0.388929273 |
| cg24033042 | BRUNOL5                            | 1.50E-05    | 0.388900902 |
| cg18792904 | TPBG;TPBG                          | 0.001948248 | 0.388883563 |
| cg21547690 | LRFN5;LRFN5                        | 9.24E-05    | 0.388855307 |
| cg07991288 | C20orf56                           | 0.000187194 | 0.388853125 |
| cg09214112 |                                    | 8.60E-06    | 0.388847079 |
| cg05184377 |                                    | 8.60E-06    | 0.388843872 |
| cg00745725 | GABRG3                             | 4.34E-05    | 0.388836464 |
| cg23913421 |                                    | 1.50E-05    | 0.388822257 |
| cg13324546 | NKX2-6                             | 5.59E-05    | 0.388817718 |
| cg26444097 |                                    | 3.34E-05    | 0.388817261 |
| cg26654934 |                                    | 0.000148457 | 0.388811564 |
| cg10227191 | KRT18;KRT18                        | 4.34E-05    | 0.388793748 |
| cg06872705 | LMX1A                              | 3.34E-05    | 0.388788094 |
| cg22681934 | NCAN                               | 0.002304201 | 0.388780546 |
| cg00002719 | C1orf114                           | 0.000262362 | 0.388774206 |
| cg01867395 | PAX6                               | 3.34E-05    | 0.388728287 |
| cg03574651 | SLC30A9                            | 0.000148457 | 0.38870187  |
| cg06657142 | FGFR2;FGFR2;FGFR2;FGFR2;FGFR2      | 7.23E-05    | 0.388690177 |
| cg27020216 | SGEF                               | 0.000117986 | 0.388645362 |
| cg15081351 | MYO3A                              | 1.50E-05    | 0.388614387 |
| cg12298905 | PROX1                              | 0.001948248 | 0.388607871 |
| cg10506318 | ERCC8;NDUFAF2                      | 0.003734675 | 0.388591367 |
| cg01558916 |                                    | 5.59E-05    | 0.388578188 |
| cg11342452 | NKX6-2                             | 1.50E-05    | 0.388550574 |
| cg25648436 | ZSCAN1                             | 8.60E-06    | 0.388538607 |
| cg01811815 | RASA3                              | 9.24E-05    | 0.388537542 |
| cg22762844 | MAL;MAL;MAL;MAL                    | 4.34E-05    | 0.388514688 |
| cg05328547 | FERD3L                             | 1.96E-05    | 0.38849353  |
| cg10084644 | STAG3;GPC2                         | 0.000187194 | 0.388468013 |
| cg26983198 | TNNT3;TNNT3;TNNT3;TNNT3            | 0.000290372 | 0.388451607 |
| cg12190994 | SDK1;SDK1                          | 0.000791389 | 0.38844365  |
| cg06338421 |                                    | 1.50E-05    | 0.388439064 |
| cg27385032 | ZNF334;ZNF334                      | 1.96E-05    | 0.388425019 |
| cg16564824 | SNAP25;SNAP25;SNAP25;SNAP25        | 1.11E-05    | 0.388415841 |
| cg02869486 |                                    | 1.11E-05    | 0.388403881 |
| cg06374962 |                                    | 0.00043997  | 0.388394404 |
| cg08280383 | GPR139                             | 8.60E-06    | 0.388392428 |
| cg06091013 | FBXO39                             | 0.000117986 | 0.388378987 |
| cg22071805 | PNPLA3                             | 4.34E-05    | 0.388368917 |
| cg09266149 | ZNF697                             | 0.000791389 | 0.388328781 |
| cg01830294 | WNT2;WNT2                          | 1.96E-05    | 0.388274621 |



|            |                          |             |             |
|------------|--------------------------|-------------|-------------|
| cg02011392 | GRIK2;GRIK2;GRIK2        | 0.000233422 | 0.388269512 |
| cg10864878 |                          | 0.000148457 | 0.388232763 |
| cg07871947 | SLC12A5;SLC12A5          | 3.34E-05    | 0.38821909  |
| cg24120696 |                          | 0.000357885 | 0.388208672 |
| cg18115215 | TMEM108;TMEM108          | 0.00043997  | 0.38819796  |
| cg26195356 |                          | 0.001376172 | 0.388179133 |
| cg26948603 | DRD1                     | 7.23E-05    | 0.388173844 |
| cg04457069 |                          | 0.000148457 | 0.388170803 |
| cg27492467 | PPP2R2C                  | 0.000233422 | 0.388170655 |
| cg11608958 |                          | 3.34E-05    | 0.388164115 |
| cg14898260 | CA8                      | 0.00043997  | 0.388155582 |
| cg24676071 | ADCY1                    | 0.001376172 | 0.388153561 |
| cg27036111 | SLC6A5                   | 8.60E-06    | 0.388138654 |
| cg14778074 | GABRA2;GABRA2            | 8.60E-06    | 0.388118179 |
| cg06340987 | DBX1                     | 5.59E-05    | 0.388088398 |
| cg16752876 | OSR1                     | 2.58E-05    | 0.388072606 |
| cg16323245 | ZBTB20;ZBTB20            | 0.002714607 | 0.388056327 |
| cg27032146 | DLX5                     | 0.001376172 | 0.388055275 |
| cg01148441 | MPPED1                   | 0.000233422 | 0.388007683 |
| cg11957400 | CACNA2D4                 | 1.11E-05    | 0.388007307 |
| cg24631970 | XKR6                     | 0.00043997  | 0.38799635  |
| cg11354629 | GSX1                     | 9.24E-05    | 0.387964723 |
| cg20728105 | SCIN                     | 7.23E-05    | 0.387963502 |
| cg15842216 | HMCN1;HMCN1              | 9.24E-05    | 0.387961575 |
| cg19620994 | AADA3L3;AADA3L3          | 0.000148457 | 0.387948585 |
| cg10269365 | CCDC140                  | 1.50E-05    | 0.387934935 |
| cg06942701 | TBR1                     | 1.96E-05    | 0.387927154 |
| cg21534264 | CADPS;CADPS;CADPS        | 8.60E-06    | 0.387921605 |
| cg13523557 | ADCY1                    | 0.000233422 | 0.387902966 |
| cg22712983 | PNKD;PNKD                | 1.50E-05    | 0.387890453 |
| cg27416372 | ZIC4;ZIC4;ZIC4;ZIC4;ZIC4 | 8.60E-06    | 0.387875419 |
| cg24442454 | MDGA1                    | 2.58E-05    | 0.387868701 |
| cg14749465 | NELL1;NELL1              | 0.000537905 | 0.387866038 |
| cg19229344 | NKX2-3                   | 0.000955793 | 0.38785636  |
| cg10593922 |                          | 0.000537905 | 0.387832196 |
| cg20417527 | SLC27A6;SLC27A6          | 1.96E-05    | 0.387798067 |
| cg23565942 | NEBL                     | 9.24E-05    | 0.38778956  |
| cg06977689 | PAR6G                    | 0.000187194 | 0.387789258 |
| cg18786535 | CCDC67                   | 0.000187194 | 0.387770584 |
| cg21252105 |                          | 3.34E-05    | 0.387764223 |
| cg13837721 |                          | 5.59E-05    | 0.387747039 |
| cg23493016 | SORCS3                   | 1.11E-05    | 0.387743704 |
| cg00920970 | ESR1;ESR1;ESR1;ESR1      | 9.24E-05    | 0.387700398 |
| cg22769941 | NELL1;NELL1              | 0.001147425 | 0.387681393 |
| cg03024537 |                          | 8.60E-06    | 0.387679872 |
| cg17069914 |                          | 0.000955793 | 0.387673509 |
| cg04931256 |                          | 5.59E-05    | 0.387664011 |
| cg07969984 | CALCR;CALCR              | 2.58E-05    | 0.387657945 |
| cg03304380 | DLC1                     | 0.000233422 | 0.387655761 |
| cg01489686 | FUT9                     | 8.60E-06    | 0.38764964  |
| cg13663300 | GAS2;GAS2                | 1.50E-05    | 0.387648901 |
| cg03350900 | SOBP                     | 4.34E-05    | 0.387639071 |
| cg25506797 |                          | 0.003189589 | 0.387638753 |
| cg14427009 | PCDH17                   | 8.60E-06    | 0.387631632 |
| cg11438428 | PTF1A                    | 8.60E-06    | 0.38761802  |
| cg07688490 | TMEM45B                  | 9.24E-05    | 0.387612157 |
| cg02196294 | KCNK5                    | 0.000791389 | 0.387601536 |
| cg09455342 |                          | 1.50E-05    | 0.387550292 |
| cg21462844 | SGK3                     | 0.000122184 | 0.387525908 |
| cg14867569 | NKX2-1;NKX2-1            | 0.000117986 | 0.387509218 |

|            |                                         |             |             |
|------------|-----------------------------------------|-------------|-------------|
| cg22491141 |                                         | 9.24E-05    | 0.387489318 |
| cg22496102 | CRABP1;CRABP1                           | 0.00043997  | 0.387476671 |
| cg03986829 | FEZF2                                   | 0.001376172 | 0.387467052 |
| cg19291576 |                                         | 0.000117986 | 0.387447105 |
| cg23146534 | C7orf38                                 | 1.96E-05    | 0.387439598 |
| cg22939193 | WDR35;WDR35                             | 7.23E-05    | 0.387438811 |
| cg06511917 | PTF1A                                   | 1.50E-05    | 0.387424364 |
| cg00504690 | ROR1;ROR1                               | 0.002450672 | 0.387421604 |
| cg21141234 |                                         | 1.11E-05    | 0.387416482 |
| cg02573176 | SLC10A5                                 | 0.003189589 | 0.387402667 |
| cg03244690 | TMEM20;TMEM20                           | 7.23E-05    | 0.387391416 |
| cg13021841 | FAM84A                                  | 2.58E-05    | 0.387334831 |
| cg08158952 | ZNF835                                  | 2.58E-05    | 0.387328364 |
| cg27088150 |                                         | 0.000654035 | 0.387302979 |
| cg10904109 | GRM1;GRM1                               | 8.60E-06    | 0.387294462 |
| cg05714732 |                                         | 1.11E-05    | 0.387282495 |
| cg02383154 | HLF                                     | 4.34E-05    | 0.387280591 |
| cg06778429 | DRD2;DRD2                               | 1.96E-05    | 0.387262719 |
| cg20661985 | C20orf3                                 | 0.00043997  | 0.387258845 |
| cg03074925 |                                         | 1.11E-05    | 0.387241252 |
| cg24978630 |                                         | 0.00043997  | 0.387234676 |
| cg09576143 | HTRA1                                   | 0.000290372 | 0.387204805 |
| cg00454592 |                                         | 2.58E-05    | 0.387163366 |
| cg15617155 |                                         | 5.59E-05    | 0.387137254 |
| cg02330121 | SLC35F1                                 | 1.96E-05    | 0.387131757 |
| cg27118761 | KCNC1;KCNC1                             | 0.000955793 | 0.387127617 |
| cg21671806 | RALYL;RALYL;RALYL;RALYL                 | 1.50E-05    | 0.387126029 |
| cg05537380 | SHC2                                    | 9.24E-05    | 0.387100484 |
| cg14685796 |                                         | 5.59E-05    | 0.387081927 |
| cg08400962 | CHST8;CHST8                             | 1.11E-05    | 0.387076397 |
| cg03480337 |                                         | 0.000357885 | 0.387065331 |
| cg21873251 |                                         | 0.002304201 | 0.387060629 |
| cg06757585 | PCDHGA4;PCDHGA1;PCDHGA6;PCDHGA5;PCDHGA3 | 0.000233422 | 0.387052301 |
| cg13451025 | FAM150A                                 | 2.58E-05    | 0.387034979 |
| cg14191024 |                                         | 2.58E-05    | 0.387034913 |
| cg04961235 | PAPOLB;RADIL                            | 1.96E-05    | 0.387033379 |
| cg16646024 |                                         | 4.34E-05    | 0.387015734 |
| cg16374656 | EXT1                                    | 4.34E-05    | 0.387000627 |
| cg06476463 |                                         | 1.96E-05    | 0.386984579 |
| cg12351433 | LHCGR                                   | 0.000117986 | 0.386978991 |
| cg02619205 | AKNA                                    | 5.59E-05    | 0.38697562  |
| cg21845273 |                                         | 3.34E-05    | 0.38697253  |
| cg20163166 | LRIG3;LRIG3                             | 8.60E-06    | 0.386970077 |
| cg26640601 |                                         | 0.00043997  | 0.386965001 |
| cg19721889 | HAND1;HAND1                             | 1.11E-05    | 0.386946966 |
| cg01402255 | GATAD2B                                 | 2.58E-05    | 0.386922705 |
| cg04456916 |                                         | 8.60E-06    | 0.386886515 |
| cg06867755 | CUL3                                    | 3.34E-05    | 0.38688385  |
| cg14717796 | EPHX2;EPHX2                             | 9.24E-05    | 0.386881396 |
| cg13761440 | MPPED2                                  | 0.000233422 | 0.38686251  |
| cg12053762 | RIC8B                                   | 5.59E-05    | 0.386819996 |
| cg24849872 | ZNF287                                  | 8.60E-06    | 0.386808969 |
| cg15717926 | RFX6                                    | 7.23E-05    | 0.386798819 |
| cg18451022 | CYP1B1;CYP1B1                           | 1.96E-05    | 0.386798414 |
| cg09268729 |                                         | 7.23E-05    | 0.386798345 |
| cg14089267 |                                         | 7.23E-05    | 0.386795546 |
| cg09606941 | SLC40A1                                 | 3.34E-05    | 0.386793712 |
| cg03442425 | TMEM132E;C17orf102                      | 7.23E-05    | 0.386793164 |
| cg16086373 | TMEM200C                                | 0.000187194 | 0.386772338 |
| cg16648355 | ESRP1;ESRP1;ESRP1;ESRP1;ESRP1           | 0.000117986 | 0.386727478 |

|            |                         |             |             |
|------------|-------------------------|-------------|-------------|
| cg15541630 | PSKH2                   | 7.23E-05    | 0.386722578 |
| cg14377594 | DMRT2;DMRT2;DMRT2       | 1.50E-05    | 0.386701763 |
| cg22637435 | TRAPPC9;TRAPPC9         | 5.59E-05    | 0.386700158 |
| cg16842423 | GALNTL4                 | 8.60E-06    | 0.386681664 |
| cg13950603 | CLEC4G                  | 0.000117986 | 0.386672724 |
| cg00509108 | MT1A                    | 0.001147425 | 0.386671117 |
| cg17361203 | DSCAML1                 | 2.58E-05    | 0.386666857 |
| cg21984150 | SNCAIP                  | 0.000290372 | 0.38666412  |
| cg02108033 | FAM184B                 | 0.000357885 | 0.386663804 |
| cg07150045 | KCNH7;KCNH7             | 8.60E-06    | 0.386647194 |
| cg15794859 | TCF21                   | 7.23E-05    | 0.386625878 |
| cg00457403 | SST                     | 2.58E-05    | 0.386623431 |
| cg16349827 | VWA3B                   | 8.60E-06    | 0.386606406 |
| cg25806307 | FBXO17                  | 1.96E-05    | 0.386605498 |
| cg13397436 | PDE4D;PDE4D             | 0.00043997  | 0.386589352 |
| cg11204212 |                         | 1.11E-05    | 0.386584046 |
| cg27113440 | ANO5;ANO5               | 2.58E-05    | 0.386578892 |
| cg10372047 | RNF180;RNF180           | 1.11E-05    | 0.386550315 |
| cg01568784 | RAB38                   | 0.000537905 | 0.386543444 |
| cg01572694 | MIR10A                  | 7.23E-05    | 0.386540747 |
| cg25576997 | C14orf34;C14orf34       | 0.000654035 | 0.386537543 |
| cg11980129 | ROBO1                   | 8.60E-06    | 0.386535123 |
| cg07147475 |                         | 1.11E-05    | 0.386533756 |
| cg08067566 |                         | 0.000537905 | 0.386529939 |
| cg24213507 | GRM7;GRM7               | 0.000148457 | 0.386529492 |
| cg05642546 | ELMO1                   | 0.000148457 | 0.386525978 |
| cg04499648 | MYOD1                   | 2.58E-05    | 0.386505597 |
| cg09109411 | PDE6A                   | 9.24E-05    | 0.38650115  |
| cg10530281 | TBX3;TBX3               | 0.000187194 | 0.386496226 |
| cg15531403 | NPBWR1                  | 0.000955793 | 0.386468936 |
| cg00430036 | SLC35D2                 | 5.59E-05    | 0.386451666 |
| cg08878368 | SALL1;SALL1             | 1.50E-05    | 0.386423074 |
| cg25347098 | PROX1                   | 0.000955793 | 0.386414897 |
| cg20947377 | PTPRZ1                  | 2.58E-05    | 0.386410215 |
| cg05638287 | KCNK1                   | 1.96E-05    | 0.386398027 |
| cg05550276 | TOX3;TOX3               | 0.000148457 | 0.386378697 |
| cg15123984 | MSX2;MSX2               | 4.34E-05    | 0.386376828 |
| cg06636427 | UNCX                    | 4.34E-05    | 0.386375203 |
| cg11590772 | ADAMTS10                | 1.11E-05    | 0.386374655 |
| cg13570972 | PAX6                    | 1.96E-05    | 0.386369757 |
| cg19600750 | OTX2                    | 1.50E-05    | 0.386368172 |
| cg05152589 | CADM2;CADM2;CADM2;CADM2 | 3.34E-05    | 0.386359991 |
| cg05931096 | PTPRZ1                  | 1.50E-05    | 0.386357587 |
| cg22995692 |                         | 5.59E-05    | 0.386356076 |
| cg27392792 | PTPRN2;PTPRN2;PTPRN2    | 9.24E-05    | 0.386351033 |
| cg06193578 |                         | 1.96E-05    | 0.38634849  |
| cg18742346 | PENK;PENK               | 0.000117986 | 0.386343113 |
| cg08104202 | C1orf114                | 0.000148457 | 0.386340482 |
| cg22168369 | MCOLN2                  | 0.000537905 | 0.386325659 |
| cg27527630 | WIPF3                   | 4.34E-05    | 0.38629     |
| cg00661970 |                         | 0.000117986 | 0.386279157 |
| cg27630311 | TBX3;TBX3               | 4.34E-05    | 0.386277509 |
| cg15180867 | TCF15                   | 3.34E-05    | 0.386267671 |
| cg02483449 |                         | 5.59E-05    | 0.386237206 |
| cg02086467 | OTX2                    | 3.34E-05    | 0.386229147 |
| cg05748163 | EBF2                    | 1.96E-05    | 0.386215152 |
| cg13564742 | FOXE1                   | 1.96E-05    | 0.386211143 |
| cg08110542 |                         | 0.00043997  | 0.386195075 |
| cg16810605 |                         | 0.000187194 | 0.386175699 |
| cg00032205 | TSPYL5                  | 0.001147425 | 0.386150819 |

|            |                                    |             |             |
|------------|------------------------------------|-------------|-------------|
| cg26143452 | TBPL2                              | 4.34E-05    | 0.386148537 |
| cg20641748 |                                    | 8.60E-06    | 0.386132421 |
| cg05214235 | TEAD1                              | 0.000117986 | 0.386125884 |
| cg25539505 |                                    | 4.34E-05    | 0.386124821 |
| cg04823311 | TRIL                               | 0.002304201 | 0.386122635 |
| cg22941668 | MIR145;LOC728264                   | 5.59E-05    | 0.386121416 |
| cg19542987 | ARMC3                              | 9.24E-05    | 0.386120469 |
| cg20525917 | GATA5                              | 9.24E-05    | 0.386116336 |
| cg06971092 |                                    | 5.59E-05    | 0.386111412 |
| cg12690369 | PTPRR                              | 1.11E-05    | 0.38610683  |
| cg11071401 | CACNA1G;CACNA1G;CACNA1G;CACNA1G;CA | 5.59E-05    | 0.386100242 |
| cg20436262 | MGC2889;HRASLS                     | 1.96E-05    | 0.386078257 |
| cg24803719 |                                    | 3.34E-05    | 0.386059528 |
| cg15331039 | SH3BGRL2                           | 8.60E-06    | 0.386037717 |
| cg14034757 | CAMK1G                             | 0.00043997  | 0.386032697 |
| cg21105916 | PCDHB19P                           | 4.34E-05    | 0.386004615 |
| cg05890727 | FBXO34;FBXO34                      | 3.34E-05    | 0.385977077 |
| cg16648426 |                                    | 1.96E-05    | 0.385960637 |
| cg11492723 |                                    | 5.59E-05    | 0.385948311 |
| cg11176095 | GPR126;GPR126;GPR126;GPR126        | 8.60E-06    | 0.385939305 |
| cg01157404 | RYR2                               | 8.60E-06    | 0.385931535 |
| cg19064523 | TWIST1                             | 2.58E-05    | 0.385925829 |
| cg02743713 |                                    | 0.000148457 | 0.385911798 |
| cg14511698 | SIX6                               | 1.11E-05    | 0.385900406 |
| cg11837766 | ROR1;ROR1                          | 0.000233422 | 0.385867554 |
| cg20624923 | PRLHR                              | 1.11E-05    | 0.385861023 |
| cg16041412 |                                    | 0.000654035 | 0.385850013 |
| cg15737290 | CCDC67                             | 1.50E-05    | 0.38583141  |
| cg21776417 |                                    | 1.96E-05    | 0.385789473 |
| cg13573745 |                                    | 0.000187194 | 0.385777178 |
| cg00822495 | OTX2                               | 1.50E-05    | 0.385774598 |
| cg22111527 |                                    | 3.34E-05    | 0.385766522 |
| cg17389519 | PTF1A                              | 4.34E-05    | 0.385751338 |
| cg12146386 |                                    | 0.000357885 | 0.385748053 |
| cg10785443 |                                    | 0.00043997  | 0.385744577 |
| cg13564533 |                                    | 4.34E-05    | 0.385722311 |
| cg13422921 |                                    | 4.34E-05    | 0.385712909 |
| cg04961466 | NPY5R                              | 1.50E-05    | 0.385707891 |
| cg22123464 | SLC8A2                             | 2.58E-05    | 0.385706278 |
| cg11038322 | TFAP2D                             | 0.000117986 | 0.385696805 |
| cg25486757 | PDZRN3                             | 8.60E-06    | 0.385678674 |
| cg18084609 | COCH;COCH                          | 8.60E-06    | 0.385650387 |
| cg18669209 |                                    | 0.000233422 | 0.385619877 |
| cg13016408 | LYPD1;LYPD1                        | 5.59E-05    | 0.385612274 |
| cg19220719 |                                    | 0.0050758   | 0.385610394 |
| cg02576468 | SPTBN4                             | 1.96E-05    | 0.385610238 |
| cg27335600 | CACNA1D;CACNA1D;CACNA1D            | 9.24E-05    | 0.385608557 |
| cg05653707 | EMX2;EMX2;EMX2OS                   | 0.000117986 | 0.385606734 |
| cg06763078 | KCNC1;KCNC1                        | 0.000290372 | 0.385595209 |
| cg16671160 |                                    | 1.11E-05    | 0.385558406 |
| cg10810799 | HOXC12                             | 4.34E-05    | 0.385547542 |
| cg04529785 | NOS1                               | 0.000526175 | 0.385543174 |
| cg11945839 | ART5;ART5                          | 0.000233422 | 0.385524603 |
| cg14793086 | LCA5;LCA5;LCA5;LCA5                | 0.000117986 | 0.385511953 |
| cg06660395 |                                    | 8.60E-06    | 0.385495189 |
| cg00101712 | ROPN1                              | 7.23E-05    | 0.385477207 |
| cg16747714 | KRT18;KRT18                        | 0.000117986 | 0.385468093 |
| cg26163880 | MYH14;MYH14;MYH14                  | 9.24E-05    | 0.385462175 |
| cg21350115 | CALCRL;CALCRL                      | 1.11E-05    | 0.385452412 |
| cg18525352 | NUAK1                              | 0.000117986 | 0.385418232 |

|            |                                     |             |             |
|------------|-------------------------------------|-------------|-------------|
| cg06779604 | CADPS2;CADPS2;CADPS2;CADPS2;CADPS2; | 0.000357885 | 0.385416947 |
| cg02515725 | PDLIM3;PDLIM3                       | 8.60E-06    | 0.385368792 |
| cg07678449 | AADAT;AADAT                         | 0.000233422 | 0.385354754 |
| cg22534097 | ANKRD1                              | 0.000290372 | 0.385352925 |
| cg06364757 | PYGO1                               | 8.60E-06    | 0.385311299 |
| cg22401679 |                                     | 0.000537905 | 0.385300338 |
| cg05486213 | MPPED2                              | 0.000187194 | 0.385268769 |
| cg01667646 | SH3GL3;SH3GL3                       | 2.58E-05    | 0.385267994 |
| cg16491960 |                                     | 7.23E-05    | 0.385264461 |
| cg10456459 | ETNK1                               | 0.000233422 | 0.385259545 |
| cg17443359 |                                     | 0.000955793 | 0.385258157 |
| cg25527618 | NDFIP2;NDFIP2                       | 3.21E-05    | 0.385242123 |
| cg00252615 | GABRB2;GABRB2                       | 8.60E-06    | 0.385233218 |
| cg22851295 | GCM2                                | 1.96E-05    | 0.38521709  |
| cg14711866 | STOX2                               | 0.000117986 | 0.385205482 |
| cg04088945 |                                     | 7.23E-05    | 0.385191197 |
| cg22797570 |                                     | 0.001147425 | 0.385183218 |
| cg00896347 |                                     | 1.11E-05    | 0.385174663 |
| cg00499700 | F2RL1                               | 7.23E-05    | 0.385154167 |
| cg06324373 | CRTAC1                              | 5.59E-05    | 0.385141883 |
| cg09469566 |                                     | 0.000357885 | 0.385133571 |
| cg16399049 | HS3ST2                              | 3.34E-05    | 0.385113059 |
| cg22154659 | HOXA1;HOXA1                         | 8.60E-06    | 0.385099643 |
| cg22711111 | TRIM15                              | 0.000148457 | 0.385091211 |
| cg21821214 |                                     | 0.000117986 | 0.385091032 |
| cg01298010 |                                     | 0.000290372 | 0.385085333 |
| cg22646324 | ADRA2C                              | 0.00043997  | 0.3850328   |
| cg02346713 | TNFAIP8L3                           | 0.000117986 | 0.385031642 |
| cg05979020 | HOXD10                              | 1.96E-05    | 0.385021381 |
| cg02981443 | TMEM98;TMEM98                       | 8.60E-06    | 0.385015906 |
| cg01295203 | PRDM14                              | 2.58E-05    | 0.385004971 |
| cg00902847 | FGF12                               | 0.000148457 | 0.384998247 |
| cg25967418 | PCDHA7;PCDHA12;PCDHA6;PCDHA10;PCDH  | 0.000117986 | 0.384993768 |
| cg13764991 | DMRT2;DMRT2;DMRT2                   | 9.24E-05    | 0.384990575 |
| cg06966660 | TACC2;TACC2;TACC2;TACC2             | 0.000654035 | 0.38497688  |
| cg09467508 |                                     | 2.58E-05    | 0.384952432 |
| cg26124242 | GUCY1A2                             | 7.23E-05    | 0.384944239 |
| cg15085086 | OPRM1;OPRM1;OPRM1;OPRM1;OPRM1;OPR   | 1.96E-05    | 0.384896371 |
| cg06496261 | PDE11A;PDE11A                       | 0.00043997  | 0.384873585 |
| cg01978558 |                                     | 7.23E-05    | 0.384870483 |
| cg26945996 | SYT9                                | 2.58E-05    | 0.384854368 |
| cg24773418 |                                     | 0.00041966  | 0.384845956 |
| cg10915772 | SCIN                                | 2.58E-05    | 0.384833994 |
| cg05769349 | TBX5;TBX5                           | 2.58E-05    | 0.384831346 |
| cg15633664 | GRP;GRP;GRP                         | 2.58E-05    | 0.384823403 |
| cg14258853 | TMTC1                               | 4.34E-05    | 0.384795644 |
| cg23654127 | GPR120                              | 5.59E-05    | 0.384788101 |
| cg25950112 |                                     | 5.59E-05    | 0.384779746 |
| cg25563233 | RGL3;RGL3                           | 4.34E-05    | 0.384779232 |
| cg14511782 | GPR85;GPR85;GPR85;GPR85             | 9.24E-05    | 0.384761719 |
| cg00874990 |                                     | 8.60E-06    | 0.384755864 |
| cg14996783 | TRIL                                | 0.003189589 | 0.38474012  |
| cg06493664 | CALB2;CALB2;CALB2;CALB2;CALB2       | 5.59E-05    | 0.384739845 |
| cg23929344 | SFTA3                               | 2.58E-05    | 0.38472979  |
| cg26917140 |                                     | 2.58E-05    | 0.384697002 |
| cg03464514 | PTN;PTN                             | 1.50E-05    | 0.38469252  |
| cg09300089 | ANKRD11                             | 2.58E-05    | 0.384685811 |
| cg14473327 | DMRT3                               | 2.58E-05    | 0.38468421  |
| cg05027458 | ADAMTS17;ADAMTS17                   | 0.00043997  | 0.384662468 |
| cg05472874 | SULT4A1                             | 8.60E-06    | 0.384651695 |

|            |                               |             |             |
|------------|-------------------------------|-------------|-------------|
| cg07893512 | HBM                           | 2.58E-05    | 0.384643563 |
| cg02305242 | FLRT2                         | 1.96E-05    | 0.384634665 |
| cg24494316 |                               | 0.000537905 | 0.384619467 |
| cg23333146 | EIF4E3;EIF4E3;EIF4E3;EIF4E3   | 1.96E-05    | 0.384579055 |
| cg05539515 | KANK4                         | 8.60E-06    | 0.384577395 |
| cg13601496 | ADAMTS5                       | 4.34E-05    | 0.3845648   |
| cg21852439 | GRID2                         | 0.000117986 | 0.384561611 |
| cg26063106 | FREM2                         | 1.11E-05    | 0.384560103 |
| cg26669806 | COMP                          | 7.23E-05    | 0.384514069 |
| cg26738987 | GPR83                         | 4.34E-05    | 0.384511155 |
| cg03964958 | HOXD12                        | 0.000148457 | 0.384508963 |
| cg21516341 | NELL2;NELL2;NELL2;NELL2;NELL2 | 0.000148457 | 0.384505813 |
| cg16974909 | WDR17;WDR17                   | 2.58E-05    | 0.384504432 |
| cg03774514 | FOXA2;FOXA2                   | 0.000537905 | 0.384485073 |
| cg18591228 | OSBPL5;OSBPL5;OSBPL5          | 1.50E-05    | 0.384482484 |
| cg16051245 | TMPRSS2;TMPRSS2               | 0.000537905 | 0.384452063 |
| cg14192957 |                               | 0.000205664 | 0.384416489 |
| cg05324789 |                               | 1.11E-05    | 0.384408881 |
| cg23948080 | VASH1                         | 0.000148457 | 0.384407097 |
| cg01862172 | SAMD5                         | 1.50E-05    | 0.38440326  |
| cg24495234 | CTXN2                         | 3.34E-05    | 0.384364868 |
| cg01419757 | C11orf70                      | 0.000122184 | 0.384358239 |
| cg07093155 | USP7                          | 0.000233422 | 0.384347421 |
| cg09464194 | FBXO27                        | 0.000357885 | 0.384341555 |
| cg07456114 | HELT                          | 0.000233422 | 0.384319696 |
| cg17554604 |                               | 0.000262362 | 0.384304377 |
| cg15986587 |                               | 1.50E-05    | 0.384289522 |
| cg18855674 |                               | 1.50E-05    | 0.384284357 |
| cg00740020 | KCNC3                         | 2.58E-05    | 0.384265437 |
| cg04865692 | KCNC3                         | 1.96E-05    | 0.384260155 |
| cg26195583 |                               | 2.58E-05    | 0.38425858  |
| cg14991487 | HOXD9                         | 1.96E-05    | 0.384253453 |
| cg05790451 | APBA2;APBA2                   | 0.000233422 | 0.384252869 |
| cg06268694 | CELSR1                        | 0.002304201 | 0.384235645 |
| cg15861585 | DRD4                          | 7.23E-05    | 0.384219414 |
| cg24617568 | DPY19L2P4                     | 5.59E-05    | 0.384212019 |
| cg10455940 | BTRC;BTRC                     | 0.00043997  | 0.384208288 |
| cg11012061 |                               | 5.59E-05    | 0.38420531  |
| cg03631455 | PCDHB13                       | 1.50E-05    | 0.384197957 |
| cg10437806 | C12orf39                      | 0.000148457 | 0.384178206 |
| cg09166091 |                               | 0.000148457 | 0.384159945 |
| cg08036121 | SH3BP4                        | 8.60E-06    | 0.384158088 |
| cg01904063 | ISL1                          | 2.58E-05    | 0.384153255 |
| cg14647451 | EPHA5;EPHA5                   | 2.58E-05    | 0.384131157 |
| cg12299361 |                               | 1.50E-05    | 0.384118115 |
| cg04445871 |                               | 1.11E-05    | 0.384099072 |
| cg11070069 |                               | 8.60E-06    | 0.384095517 |
| cg18585903 | RBP4                          | 2.58E-05    | 0.384078655 |
| cg04484126 |                               | 0.000233422 | 0.384068494 |
| cg04640250 | LOC283392;TRHDE;LOC283392     | 5.59E-05    | 0.384064813 |
| cg03620853 | CYP2S1                        | 7.23E-05    | 0.384044913 |
| cg20813518 |                               | 0.003734675 | 0.384035492 |
| cg05746795 |                               | 1.11E-05    | 0.384015424 |
| cg19047265 |                               | 1.96E-05    | 0.38401311  |
| cg04921989 |                               | 0.000537905 | 0.383997755 |
| cg20312012 | FER1L5                        | 0.000357885 | 0.383996608 |
| cg12142521 | ACOXL;ACOXL;ACOXL             | 9.24E-05    | 0.383993473 |
| cg27016494 | DLX5                          | 4.34E-05    | 0.383984578 |
| cg05172259 |                               | 8.60E-06    | 0.38397797  |
| cg27403265 | HS3ST2                        | 2.58E-05    | 0.38396353  |

|            |                                      |             |             |
|------------|--------------------------------------|-------------|-------------|
| cg13144843 |                                      | 0.000791389 | 0.383954296 |
| cg06493334 | LHFPL3                               | 0.000117986 | 0.383947449 |
| cg05477514 | NKX2-6                               | 5.59E-05    | 0.383931068 |
| cg26842121 |                                      | 1.96E-05    | 0.383922517 |
| cg08279075 | IRX3                                 | 0.000791389 | 0.383880978 |
| cg14613271 | SLC5A7                               | 4.34E-05    | 0.383868946 |
| cg04515001 | KAAG1;DCDC2;KAAG1;DCDC2              | 4.34E-05    | 0.383867681 |
| cg21286402 | SLC22A15                             | 0.000537905 | 0.383866222 |
| cg11797092 | SH3GL3;SH3GL3                        | 1.50E-05    | 0.383842837 |
| cg10542883 |                                      | 0.000537905 | 0.383836556 |
| cg20778451 | ZNF454                               | 9.24E-05    | 0.383834497 |
| cg00739120 | GAPDHS;TMEM147                       | 8.60E-06    | 0.383818524 |
| cg18638018 |                                      | 1.96E-05    | 0.383809956 |
| cg15243856 | MATN4;MATN4;RBPJL;MATN4              | 4.34E-05    | 0.38380791  |
| cg19194373 | EDN3;EDN3;EDN3;EDN3;EDN3;EDN3;EDN3;E | 0.000117986 | 0.383780016 |
| cg19258784 | ROBO1;ROBO1;ROBO1;ROBO1              | 3.34E-05    | 0.383768623 |
| cg14024461 | HIST3H2A;HIST3H2BB                   | 0.000205664 | 0.383757758 |
| cg04845053 | P2RY1;P2RY1                          | 0.001639597 | 0.383753191 |
| cg05040472 |                                      | 9.24E-05    | 0.38373671  |
| cg03308092 | GAB4                                 | 7.23E-05    | 0.383724382 |
| cg08520743 | PON3                                 | 0.000233422 | 0.383718642 |
| cg00142106 | HCG4                                 | 0.000233422 | 0.383712462 |
| cg04871472 |                                      | 0.000148457 | 0.383704514 |
| cg06444282 | VWA5B1                               | 0.000290372 | 0.383691376 |
| cg04237663 | KCNV1                                | 0.000117986 | 0.383685241 |
| cg13702005 | C12orf42;C12orf42                    | 0.000955793 | 0.383677166 |
| cg03072621 | A2BP1;A2BP1;A2BP1;A2BP1              | 0.000233422 | 0.383671605 |
| cg05446322 | MIR548F5;NBEA                        | 3.34E-05    | 0.38366759  |
| cg05756220 | KCNA4                                | 8.60E-06    | 0.38366624  |
| cg05306070 |                                      | 0.006738759 | 0.383653006 |
| cg08218734 | FAM196A;DOCK1                        | 0.000148457 | 0.383640436 |
| cg10767192 |                                      | 1.50E-05    | 0.383628283 |
| cg10080155 | PHF21B;PHF21B                        | 0.000148457 | 0.383594421 |
| cg07883823 | SLC22A3                              | 7.23E-05    | 0.383572156 |
| cg25189564 | VIPR2                                | 0.006823935 | 0.383571626 |
| cg05994320 |                                      | 2.58E-05    | 0.383548958 |
| cg05293820 | STXBP5L                              | 5.59E-05    | 0.383546632 |
| cg12325536 | LOC645323;LOC645323;LOC645323        | 0.000233422 | 0.383544544 |
| cg14073571 | VIPR2                                | 0.000654035 | 0.383540958 |
| cg09301294 | EPHA6                                | 3.34E-05    | 0.383540853 |
| cg05259545 | LOC440040                            | 7.23E-05    | 0.383538631 |
| cg14554468 |                                      | 0.000290372 | 0.383523579 |
| cg07602998 | ROR1;ROR1                            | 0.001639597 | 0.383516366 |
| cg05030680 | PITX2;PITX2;PITX2                    | 0.000187194 | 0.383513448 |
| cg05135569 | DBX2                                 | 0.000148457 | 0.383507692 |
| cg00096922 | DLX5                                 | 0.001948248 | 0.383507482 |
| cg20413471 | ADAMTS19                             | 1.96E-05    | 0.383505326 |
| cg14225678 | VSTM2A                               | 2.58E-05    | 0.383504295 |
| cg05615464 |                                      | 5.59E-05    | 0.383487962 |
| cg02438781 |                                      | 1.11E-05    | 0.383486931 |
| cg07534843 | MATN4;MATN4;MATN4;RBPJL              | 4.34E-05    | 0.383462769 |
| cg04139641 | C9orf170;C9orf170                    | 0.000117986 | 0.383422652 |
| cg02243157 |                                      | 0.000148457 | 0.383396891 |
| cg17121178 | BSX                                  | 8.60E-06    | 0.383393251 |
| cg15716405 | EDIL3                                | 0.000148457 | 0.383383399 |
| cg13498757 |                                      | 0.002304201 | 0.383378944 |
| cg11347582 |                                      | 0.00043997  | 0.383372814 |
| cg17632372 |                                      | 8.60E-06    | 0.383365503 |
| cg04830146 | MYO1D                                | 1.11E-05    | 0.383363197 |
| cg07167946 | IRX4                                 | 3.34E-05    | 0.383346311 |

|            |                                     |             |             |
|------------|-------------------------------------|-------------|-------------|
| cg05295015 |                                     | 1.50E-05    | 0.383316913 |
| cg13939185 | RORB                                | 0.000233422 | 0.383286956 |
| cg21860429 |                                     | 8.60E-06    | 0.383283914 |
| cg21799469 |                                     | 1.96E-05    | 0.38327805  |
| cg27498114 | ADRB3                               | 2.58E-05    | 0.38327671  |
| cg24185576 | MPPED2                              | 0.001376172 | 0.383264605 |
| cg20919680 | TMEM198;CHPF;TMEM198                | 0.000233422 | 0.383236138 |
| cg01464835 | VSTM2B                              | 0.000654035 | 0.383232847 |
| cg14335275 | LYPD6                               | 1.50E-05    | 0.383224662 |
| cg23462242 | CYFIP2;CYFIP2;CYFIP2                | 0.000791389 | 0.383221605 |
| cg22316614 |                                     | 1.11E-05    | 0.38321818  |
| cg07419144 |                                     | 3.34E-05    | 0.383217318 |
| cg07833420 | HTR1E;HTR1E                         | 0.000148457 | 0.3831588   |
| cg26880493 | PDZD2                               | 0.000233422 | 0.38314897  |
| cg21230493 | ADRA1A;ADRA1A;ADRA1A;ADRA1A;ADRA1A; | 2.58E-05    | 0.383147047 |
| cg07957294 | PRRX1;PRRX1                         | 5.59E-05    | 0.383144077 |
| cg01579912 | CDC16;CDC16                         | 0.001376172 | 0.38313254  |
| cg15986841 | ECHDC2                              | 0.000526175 | 0.383121555 |
| cg26164310 | LPPR4;LPPR4                         | 1.96E-05    | 0.383107011 |
| cg25722465 | KDR;KDR                             | 0.000148457 | 0.383102147 |
| cg08378017 |                                     | 0.000654035 | 0.383094969 |
| cg09465834 | IGSF11;IGSF11                       | 2.58E-05    | 0.383086655 |
| cg16732654 | AATK                                | 0.000117986 | 0.383056824 |
| cg01556706 | FHIT;FHIT                           | 3.34E-05    | 0.383055837 |
| cg19403534 | PRLHR                               | 7.23E-05    | 0.383047914 |
| cg15418826 | KIF21A                              | 0.003734675 | 0.383042192 |
| cg07297964 | RB1                                 | 8.60E-06    | 0.383037364 |
| cg03139435 | AURKA;AURKA;AURKA;CSTF1;AURKA;CSTF1 | 0.000117986 | 0.383034417 |
| cg08793877 |                                     | 0.000187194 | 0.382994936 |
| cg16769152 | KCTD14                              | 0.000537905 | 0.382994821 |
| cg03840647 | SFTA3                               | 1.50E-05    | 0.38299442  |
| cg00884093 | CELSR1                              | 0.007873393 | 0.382946693 |
| cg17110006 |                                     | 7.23E-05    | 0.382946191 |
| cg04012266 | PDE3A                               | 0.000233422 | 0.382941711 |
| cg05986288 |                                     | 1.11E-05    | 0.382924231 |
| cg05673756 | NALCN                               | 4.34E-05    | 0.382919388 |
| cg19696317 | SLITRK1;SLITRK1                     | 7.23E-05    | 0.382918486 |
| cg23148701 | DPY19L2                             | 5.59E-05    | 0.382917432 |
| cg15033269 | SS18L2                              | 5.59E-05    | 0.382915945 |
| cg23922259 |                                     | 5.59E-05    | 0.382898761 |
| cg01620379 | RNASE11                             | 4.34E-05    | 0.382879976 |
| cg18403551 | SPSB4                               | 0.001639597 | 0.382853832 |
| cg19609242 | OSMR;OSMR                           | 3.34E-05    | 0.382844696 |
| cg14328641 | MS4A3;MS4A3;MS4A3                   | 9.24E-05    | 0.382843566 |
| cg03526459 |                                     | 0.002266401 | 0.382835256 |
| cg23137881 | C4orf45                             | 0.00043997  | 0.38283387  |
| cg11657808 | RYR2                                | 1.11E-05    | 0.382816502 |
| cg06798106 |                                     | 4.34E-05    | 0.38279754  |
| cg13891978 | KCNH5;KCNH5;KCNH5                   | 8.60E-06    | 0.382794515 |
| cg22274539 | C12orf42;C12orf42                   | 0.000233422 | 0.382762567 |
| cg06333058 | CLIP4                               | 0.000290372 | 0.382757259 |
| cg19048251 |                                     | 3.34E-05    | 0.382748482 |
| cg08602190 | ADAM12;ADAM12                       | 1.50E-05    | 0.382745613 |
| cg20889841 |                                     | 8.60E-06    | 0.382740769 |
| cg00989492 |                                     | 3.34E-05    | 0.382734569 |
| cg11642382 | CNTNAP2                             | 0.000187194 | 0.382733976 |
| cg05417127 | HS3ST6                              | 0.000357885 | 0.38272748  |
| cg06510074 |                                     | 8.60E-06    | 0.382727154 |
| cg04747634 | HYDIN;HYDIN                         | 9.24E-05    | 0.382698272 |
| cg05640128 | DPP6;DPP6;DPP6                      | 8.60E-06    | 0.382692588 |



|            |                                 |             |             |
|------------|---------------------------------|-------------|-------------|
| cg08447525 | GPR149                          | 4.34E-05    | 0.38269149  |
| cg06667761 | PCDH10;PCDH10                   | 8.60E-06    | 0.382656062 |
| cg07218663 | GRM1;GRM1                       | 1.11E-05    | 0.382650734 |
| cg16968596 | ACAN;ACAN                       | 0.000357885 | 0.382648205 |
| cg25888561 |                                 | 0.001147425 | 0.382612214 |
| cg09090017 |                                 | 9.24E-05    | 0.382610728 |
| cg01925738 | PCDHB3                          | 4.34E-05    | 0.382607958 |
| cg23538854 | IL7;IL7                         | 2.58E-05    | 0.382607164 |
| cg24842733 | SNAP91;SNAP91                   | 1.96E-05    | 0.382565844 |
| cg06444755 | NXPH1;NXPH1                     | 3.34E-05    | 0.382561981 |
| cg25863967 | TSGA14                          | 3.34E-05    | 0.382561532 |
| cg00842595 | C17orf97                        | 3.34E-05    | 0.382549382 |
| cg20701486 | NPHS2                           | 0.000235312 | 0.382539599 |
| cg08447739 | HTRA1                           | 0.000537905 | 0.382534153 |
| cg17536603 |                                 | 2.58E-05    | 0.382531696 |
| cg02694017 | CACNG8;MIR935                   | 0.001948248 | 0.382526592 |
| cg04599965 |                                 | 2.58E-05    | 0.382522529 |
| cg08837627 |                                 | 3.34E-05    | 0.38251755  |
| cg24708471 |                                 | 9.24E-05    | 0.382511845 |
| cg18007959 |                                 | 4.34E-05    | 0.382501185 |
| cg01439876 |                                 | 0.000537905 | 0.382496425 |
| cg05201970 | HCN1;HCN1                       | 0.00043997  | 0.382477246 |
| cg17586302 | PHACTR2;PHACTR2;PHACTR2;PHACTR2 | 1.11E-05    | 0.382477096 |
| cg02199174 | TMEM98;TMEM98                   | 8.60E-06    | 0.382437108 |
| cg19227130 | FEZF2                           | 0.000791389 | 0.382418712 |
| cg24913868 | NKX2-3                          | 0.000791389 | 0.38241628  |
| cg02943578 | FOXC2                           | 1.11E-05    | 0.382412107 |
| cg16317181 | PCDH21                          | 0.000205664 | 0.382410389 |
| cg13671601 | OSBP2                           | 2.58E-05    | 0.382407687 |
| cg19810038 | PHACTR3                         | 2.58E-05    | 0.382403368 |
| cg22629111 | FAM78B                          | 8.60E-06    | 0.382402455 |
| cg17478228 | ELAVL3;ELAVL3;ELAVL3;ELAVL3     | 8.60E-06    | 0.382399519 |
| cg19906284 | TTN;TTN;TTN;MIR548N;TTN         | 2.58E-05    | 0.382397178 |
| cg18698884 |                                 | 1.11E-05    | 0.382392949 |
| cg05004108 | DDAH1;DDAH1                     | 2.58E-05    | 0.382364099 |
| cg01232717 | TCEB1                           | 9.24E-05    | 0.382343729 |
| cg10849854 | GREB1                           | 0.00043997  | 0.382323872 |
| cg03700449 | ASCL1                           | 0.000148457 | 0.382309504 |
| cg06721014 | C7orf63;C7orf63                 | 9.24E-05    | 0.382301899 |
| cg19542707 |                                 | 8.60E-06    | 0.382294251 |
| cg24678502 | ANO7                            | 1.50E-05    | 0.382285454 |
| cg19612191 |                                 | 3.34E-05    | 0.382265452 |
| cg07706352 | COL5A3                          | 8.60E-06    | 0.382259786 |
| cg11735997 | KCNA4                           | 8.60E-06    | 0.382244784 |
| cg11722699 | DSC3;DSC3                       | 0.000537905 | 0.382236031 |
| cg16435571 | SLC6A11                         | 5.59E-05    | 0.382234756 |
| cg17767285 | SNAP91;SNAP91                   | 0.000290372 | 0.382219543 |
| cg14672921 | GLB1L2                          | 1.50E-05    | 0.382219143 |
| cg02126788 | NHLH2;NHLH2                     | 0.000233422 | 0.382201377 |
| cg08803263 |                                 | 0.000187194 | 0.382201174 |
| cg12093775 |                                 | 0.000537905 | 0.382196998 |
| cg20081969 | ARNT2                           | 0.000791389 | 0.382173741 |
| cg11756095 |                                 | 0.001639597 | 0.382167707 |
| cg00173659 |                                 | 1.60E-05    | 0.382161378 |
| cg13552710 | ALK                             | 0.000290372 | 0.382160403 |
| cg18424634 | ZIC1                            | 3.34E-05    | 0.382136782 |
| cg13759674 | GRIN1;GRIN1;GRIN1               | 0.002714607 | 0.382128848 |
| cg05855917 | ZIC4;ZIC4;ZIC4                  | 1.96E-05    | 0.38210737  |
| cg18430555 |                                 | 1.96E-05    | 0.382096918 |
| cg07375836 | ACACA;ACACA                     | 0.003189589 | 0.382088446 |

|            |                                         |             |             |
|------------|-----------------------------------------|-------------|-------------|
| cg04882273 | CDH8                                    | 2.39E-05    | 0.382088104 |
| cg06195987 |                                         | 1.96E-05    | 0.382069755 |
| cg05681757 | FGD4                                    | 3.34E-05    | 0.382068201 |
| cg16434547 | SYNE1;SYNE1                             | 0.000223017 | 0.382068148 |
| cg14854503 | CSGALNACT1;CSGALNACT1                   | 0.000233422 | 0.382046301 |
| cg16009633 | PREX2;PREX2                             | 1.96E-05    | 0.382032531 |
| cg26701826 | SGMS2;SGMS2;SGMS2;SGMS2                 | 7.23E-05    | 0.382029058 |
| cg02193956 | MANBA                                   | 0.001147425 | 0.382017672 |
| cg27425314 | DHDDS;HMGN2;DHDDS                       | 0.000117986 | 0.382012155 |
| cg23897913 | MYOD1                                   | 0.000537905 | 0.38200757  |
| cg05071334 | CA13                                    | 1.50E-05    | 0.382000438 |
| cg02826735 |                                         | 0.000187194 | 0.381999705 |
| cg06701529 |                                         | 5.11E-05    | 0.381995256 |
| cg02332525 | GRM7;GRM7                               | 8.60E-06    | 0.381982622 |
| cg23524735 | PTH2R                                   | 8.60E-06    | 0.381979498 |
| cg08005774 | IGSF21                                  | 8.60E-06    | 0.381976348 |
| cg04326854 | PDE10A;PDE10A;PDE10A                    | 1.96E-05    | 0.381970093 |
| cg19453181 | SEMA6D;SEMA6D;SEMA6D;SEMA6D;SEMA6D      | 0.000117986 | 0.381965698 |
| cg22652378 | RPTOR;RPTOR                             | 1.96E-05    | 0.38195421  |
| cg18855080 |                                         | 0.000654035 | 0.381946871 |
| cg07896832 | CSPP1;CSPP1;COPS5                       | 0.000955793 | 0.381929104 |
| cg27664496 | DTX1                                    | 0.000654035 | 0.381910183 |
| cg03947814 | KCNQ1DN                                 | 1.50E-05    | 0.381903567 |
| cg07147166 |                                         | 1.50E-05    | 0.381877637 |
| cg04535008 | TACR3                                   | 1.11E-05    | 0.381870406 |
| cg26557693 |                                         | 4.34E-05    | 0.381860359 |
| cg19619956 | FAM193B;FAM193B                         | 1.50E-05    | 0.381829292 |
| cg07227049 | VRK2;VRK2;VRK2;VRK2;VRK2;VRK2           | 1.96E-05    | 0.381808721 |
| cg06372391 | KANK4;KANK4                             | 0.000357885 | 0.381791843 |
| cg06784991 | ZYG11A                                  | 5.59E-05    | 0.381773013 |
| cg00455372 | KCNC1;KCNC1                             | 0.001147425 | 0.381764585 |
| cg00343906 | NADK                                    | 0.000117986 | 0.381763433 |
| cg09521703 | SHISA7                                  | 1.50E-05    | 0.381745324 |
| cg25968394 |                                         | 5.11E-05    | 0.381742702 |
| cg10479082 | TRIL                                    | 0.000955793 | 0.381732268 |
| cg12176709 | DRD2;DRD2                               | 4.34E-05    | 0.381700331 |
| cg19884262 | FOXI2                                   | 8.60E-06    | 0.381680835 |
| cg26419880 | ESPN                                    | 0.000148457 | 0.381664105 |
| cg16359550 | C11orf87                                | 8.60E-06    | 0.381659467 |
| cg20175390 |                                         | 2.58E-05    | 0.381604594 |
| cg12343182 | RIMS4                                   | 0.000290372 | 0.381581002 |
| cg09491991 | ISM1                                    | 0.000654035 | 0.38157611  |
| cg04002618 | PHACTR2;PHACTR2;PHACTR2;PHACTR2;PHACTR2 | 7.23E-05    | 0.381567813 |
| cg04441847 | SFRS7                                   | 0.000117986 | 0.381562393 |
| cg16643542 | AZU1;AZU1                               | 1.96E-05    | 0.381553942 |
| cg24545961 | CLDN10;CLDN10;CLDN10                    | 0.001147425 | 0.381547823 |
| cg00264591 | IRX4                                    | 4.34E-05    | 0.3815426   |
| cg14085358 | EVX2                                    | 4.34E-05    | 0.381531256 |
| cg05580141 | C12orf41                                | 4.34E-05    | 0.381519405 |
| cg16848624 | ADCY1                                   | 0.00043997  | 0.381502879 |
| cg14586939 | NPY2R;NPY2R                             | 1.96E-05    | 0.381463118 |
| cg23996071 | HOOK1                                   | 8.60E-06    | 0.381450109 |
| cg20747266 | NMBR                                    | 1.11E-05    | 0.38144377  |
| cg18279326 |                                         | 4.34E-05    | 0.381406192 |
| cg24071719 |                                         | 0.000955793 | 0.381404626 |
| cg06581175 | DLX6AS                                  | 5.59E-05    | 0.381404511 |
| cg20657674 |                                         | 3.34E-05    | 0.381397959 |
| cg27051231 |                                         | 1.11E-05    | 0.381387196 |
| cg10175795 | TCERG1L                                 | 5.59E-05    | 0.381373699 |
| cg07365960 | GRIN2C                                  | 3.34E-05    | 0.381363836 |

|            |                                         |             |             |
|------------|-----------------------------------------|-------------|-------------|
| cg11169641 |                                         | 1.11E-05    | 0.381346672 |
| cg02809746 |                                         | 0.000290372 | 0.381337612 |
| cg25976257 | PHF21B;PHF21B                           | 4.34E-05    | 0.3813272   |
| cg24319171 | IQSEC3;IQSEC3                           | 0.00041966  | 0.381326793 |
| cg14717557 | SIM1                                    | 7.23E-05    | 0.381321628 |
| cg10363951 | CHST9;CHST9                             | 8.60E-06    | 0.38132098  |
| cg20980055 | EYA4;EYA4;EYA4                          | 0.001147425 | 0.381316215 |
| cg18845377 |                                         | 3.21E-05    | 0.381313079 |
| cg13462129 | DLX5                                    | 0.000117986 | 0.381298998 |
| cg13503413 | PHYHIPL;PHYHIPL;PHYHIPL                 | 5.59E-05    | 0.381293062 |
| cg23187653 | PCSK1                                   | 3.34E-05    | 0.381287762 |
| cg20739526 | DPP6;DPP6;DPP6                          | 0.001691157 | 0.381276919 |
| cg16803083 |                                         | 0.000233422 | 0.381251027 |
| cg16821446 | SLITRK5                                 | 0.000537905 | 0.381222492 |
| cg08077337 | FZD7                                    | 0.000654035 | 0.381214653 |
| cg10475970 | PCDHGA4;PCDHGA6;PCDHGA1;PCDHGA5;PCDHGA5 | 8.60E-06    | 0.381204912 |
| cg09074468 | CDK20;CDK20;CDK20;CDK20;CDK20           | 3.34E-05    | 0.381160176 |
| cg03319497 |                                         | 4.34E-05    | 0.381157049 |
| cg03175677 | SORCS3                                  | 9.24E-05    | 0.381138463 |
| cg05001964 | IRX3                                    | 0.001639597 | 0.381136192 |
| cg26063037 | EPHX2                                   | 1.96E-05    | 0.381135939 |
| cg07840120 | ARSJ                                    | 7.23E-05    | 0.381134331 |
| cg18268547 | TSPAN10                                 | 0.000117986 | 0.381131549 |
| cg24870568 | RNF207                                  | 0.000233422 | 0.381110906 |
| cg14254748 | L1TD1;L1TD1                             | 5.59E-05    | 0.381105143 |
| cg04476865 | MIR548F5;NBEA                           | 7.23E-05    | 0.381104262 |
| cg12149911 | CA8                                     | 3.34E-05    | 0.381057543 |
| cg01609275 |                                         | 5.59E-05    | 0.381056795 |
| cg00881585 |                                         | 2.58E-05    | 0.381029248 |
| cg26855801 |                                         | 2.58E-05    | 0.381008005 |
| cg23164982 |                                         | 2.58E-05    | 0.380994353 |
| cg27406373 | PAQR9                                   | 3.34E-05    | 0.38099215  |
| cg03833046 |                                         | 0.000654035 | 0.380986787 |
| cg10180406 | PTGS2                                   | 1.11E-05    | 0.380976464 |
| cg12809098 | DENND3                                  | 0.000233422 | 0.380960775 |
| cg26567423 | FLJ12825                                | 0.000955793 | 0.380953279 |
| cg02392179 | SORCS3                                  | 3.34E-05    | 0.380924934 |
| cg01986123 | ARL4A;ARL4A;ARL4A                       | 0.003734675 | 0.380904368 |
| cg26116950 | PDZRN4                                  | 0.001147425 | 0.380899585 |
| cg23368787 | ATP4A                                   | 8.60E-06    | 0.380897543 |
| cg01037823 | ZG16B                                   | 1.96E-05    | 0.380895946 |
| cg11113760 | ZNF385B;MIR1258                         | 0.000290372 | 0.380877109 |
| cg10453365 | RHCG                                    | 1.96E-05    | 0.380876146 |
| cg02132284 |                                         | 7.23E-05    | 0.380868567 |
| cg16402415 | ZNF280D;ZNF280D;ZNF280D                 | 0.001147425 | 0.380844574 |
| cg00107682 |                                         | 0.000148457 | 0.380836577 |
| cg11021940 | LVRN                                    | 9.24E-05    | 0.380828006 |
| cg19424531 | CYP7B1                                  | 0.000233422 | 0.380827724 |
| cg00177388 |                                         | 0.000290372 | 0.380827696 |
| cg00153934 | LCA5;LCA5                               | 0.001376172 | 0.380819293 |
| cg10168494 |                                         | 0.000233422 | 0.38080353  |
| cg16732616 | DMRTA2                                  | 0.000654035 | 0.380798181 |
| cg02339682 | DST;BEND6                               | 0.000654035 | 0.380745172 |
| cg12143789 |                                         | 0.000187194 | 0.380744422 |
| cg24534566 | CWH43                                   | 1.96E-05    | 0.380741152 |
| cg09820011 | KIAA1598;KIAA1598                       | 2.58E-05    | 0.380737658 |
| cg07832473 | RXFP3                                   | 0.00043997  | 0.380725518 |
| cg01580228 | MIR1304;SNORA8;SNORD5;SNORA18           | 0.00043997  | 0.380714031 |
| cg02744524 |                                         | 1.96E-05    | 0.380713208 |
| cg14329860 | NRXN1;NRXN1                             | 5.59E-05    | 0.380706317 |

|            |                                    |             |             |
|------------|------------------------------------|-------------|-------------|
| cg27304406 | BNC1                               | 2.58E-05    | 0.380697646 |
| cg25400229 | GNAL;GNAL;GNAL                     | 0.000233422 | 0.380696407 |
| cg09275956 |                                    | 0.000117986 | 0.38069292  |
| cg22719623 | OPRM1;OPRM1;OPRM1;OPRM1;OPRM1;OPR  | 1.96E-05    | 0.380690035 |
| cg23815900 |                                    | 8.60E-06    | 0.380686303 |
| cg20266316 | NPTX2                              | 0.000148457 | 0.380685726 |
| cg08393070 | HBM                                | 5.59E-05    | 0.380664487 |
| cg11312408 | PCDH17                             | 1.50E-05    | 0.380659112 |
| cg05633391 | KCNF1                              | 0.002714607 | 0.380658238 |
| cg08757348 | ZNF214;NLRP14;ZNF214               | 1.50E-05    | 0.380643094 |
| cg25272655 | HIST3H2BB                          | 8.60E-06    | 0.380636424 |
| cg05038216 | CLIP4                              | 0.000955793 | 0.380630226 |
| cg08526074 | SALL1;SALL1                        | 0.001691157 | 0.380615753 |
| cg07182756 | MOCS1;MOCS1                        | 0.000187194 | 0.380612395 |
| cg05480594 |                                    | 0.004131428 | 0.380603545 |
| cg15268191 |                                    | 4.34E-05    | 0.380600956 |
| cg05339390 | ARL4A;ARL4A;ARL4A                  | 0.003189589 | 0.38059541  |
| cg16094412 | RNF207                             | 0.000537905 | 0.380587102 |
| cg13178361 | UAP1                               | 5.59E-05    | 0.380586598 |
| cg17332338 |                                    | 0.00041966  | 0.380586546 |
| cg26365925 |                                    | 0.000357885 | 0.380545467 |
| cg17580935 | MAGI1;MAGI1;MAGI1                  | 1.50E-05    | 0.380533064 |
| cg02211449 |                                    | 0.000791389 | 0.380511927 |
| cg21264227 |                                    | 2.58E-05    | 0.380504539 |
| cg04811512 | PAX1                               | 0.000148457 | 0.380467589 |
| cg14266237 | KLF1                               | 1.11E-05    | 0.380466888 |
| cg10000952 |                                    | 7.23E-05    | 0.380457113 |
| cg05401965 | PCDH10;PCDH10                      | 0.000187194 | 0.380400158 |
| cg07862488 | SIX6                               | 1.50E-05    | 0.380383387 |
| cg10933959 | FLJ42289;FLJ42289                  | 5.59E-05    | 0.380375222 |
| cg19854521 | TFPI2                              | 0.000537905 | 0.380373876 |
| cg27182172 | PPARGC1A                           | 1.96E-05    | 0.380371104 |
| cg05052969 |                                    | 1.96E-05    | 0.380360707 |
| cg08399444 | GSG1;GSG1;GSG1;GSG1;GSG1;GSG1      | 1.96E-05    | 0.380344066 |
| cg05301470 |                                    | 0.000357885 | 0.380341458 |
| cg17238065 | CAPN1                              | 5.59E-05    | 0.380336988 |
| cg22555675 | UNC13A                             | 0.000117986 | 0.380310403 |
| cg07481273 | C14orf109;C14orf109                | 0.001639597 | 0.380299414 |
| cg07482935 | RELN;RELN                          | 1.50E-05    | 0.380295465 |
| cg00058449 | ZBTB12                             | 0.000187194 | 0.380276206 |
| cg05157140 | UNCX                               | 0.000290372 | 0.380259545 |
| cg08448812 | PCDHA6;PCDHA2;PCDHA1;PCDHA1;PCDHA6 | 1.50E-05    | 0.380255356 |
| cg16966315 |                                    | 0.000290372 | 0.380254444 |
| cg09510559 | NPHS1                              | 8.60E-06    | 0.380227231 |
| cg11236526 |                                    | 0.000654035 | 0.380199744 |
| cg20312087 | MGC70857                           | 0.001147425 | 0.380183751 |
| cg12091642 |                                    | 9.24E-05    | 0.380172716 |
| cg18421949 | MAP7                               | 8.60E-06    | 0.380170157 |
| cg08946575 | DDAH1;DDAH1                        | 5.59E-05    | 0.380158996 |
| cg22662844 | MAD1L1;MAD1L1;MAD1L1               | 1.96E-05    | 0.380155209 |
| cg05207495 | KCNH5;KCNH5;KCNH5                  | 1.11E-05    | 0.380152514 |
| cg22108374 | CCDC33                             | 7.23E-05    | 0.380133903 |
| cg12969193 | HOXD9                              | 4.34E-05    | 0.380116209 |
| cg21901153 | TEKT3;TEKT3                        | 5.59E-05    | 0.380089645 |
| cg24419094 | RRM2;RRM2                          | 0.00043997  | 0.380082872 |
| cg07699311 | C1orf115                           | 0.004357816 | 0.380080287 |
| cg18575811 | KCNK5                              | 0.001381372 | 0.380054657 |
| cg07027430 | A2BP1;A2BP1;A2BP1                  | 3.34E-05    | 0.380049851 |
| cg07017477 | THEM4                              | 5.59E-05    | 0.380031518 |
| cg00366818 | ARMC4                              | 0.001639597 | 0.380011495 |

|            |                                      |             |             |
|------------|--------------------------------------|-------------|-------------|
| cg25484904 | CWH43                                | 8.60E-06    | 0.379995853 |
| cg09418283 | PAWR;PAWR                            | 0.000654035 | 0.379983695 |
| cg16581347 |                                      | 9.24E-05    | 0.379983071 |
| cg16635352 | SLC6A5                               | 0.000117986 | 0.379978675 |
| cg25469714 | CUBN                                 | 0.000117986 | 0.379960028 |
| cg10893986 | PRDM16;PRDM16                        | 0.000148457 | 0.379950204 |
| cg11154747 | IL7;IL7                              | 1.96E-05    | 0.379936681 |
| cg16747109 | PITX2;PITX2;PITX2                    | 0.000148457 | 0.379933588 |
| cg18390025 | ELOVL3                               | 0.000187194 | 0.379919159 |
| cg14964336 |                                      | 0.000654035 | 0.379917979 |
| cg22836400 | TFAP2A;TFAP2A                        | 0.000233422 | 0.379910768 |
| cg02165099 | FLRT2                                | 2.58E-05    | 0.379908204 |
| cg08550421 | PCDHA7;PCDHAC1;PCDHA12;PCDHA6;PCDH   | 8.60E-06    | 0.379901473 |
| cg14314674 |                                      | 1.11E-05    | 0.379896738 |
| cg18565783 |                                      | 0.000357885 | 0.379895788 |
| cg00721530 |                                      | 1.96E-05    | 0.379877438 |
| cg02650401 | SOX2OT                               | 3.34E-05    | 0.379866396 |
| cg15808943 | HOXD8;HOXD8                          | 0.001376172 | 0.379860555 |
| cg08065657 | HAS1                                 | 8.60E-06    | 0.379858821 |
| cg09072162 | PCSK9                                | 0.000290372 | 0.379799864 |
| cg27515369 | SPSB4                                | 0.000233422 | 0.379798726 |
| cg20804191 | GBX2                                 | 0.000233422 | 0.379783114 |
| cg21406144 |                                      | 2.58E-05    | 0.379780757 |
| cg10811045 |                                      | 0.002304201 | 0.379769419 |
| cg08239858 |                                      | 0.000654035 | 0.379733453 |
| cg01622437 |                                      | 1.96E-05    | 0.37969066  |
| cg11814087 | ZFR                                  | 8.60E-06    | 0.379644479 |
| cg01434160 |                                      | 1.96E-05    | 0.379642979 |
| cg08513253 | SOBP                                 | 2.58E-05    | 0.379640668 |
| cg23026554 | LOC441666                            | 1.11E-05    | 0.379640627 |
| cg10838410 | IFFO1;IFFO1;IFFO1                    | 0.001147425 | 0.379637004 |
| cg17707487 | TFDP1;TFDP1                          | 3.34E-05    | 0.379631954 |
| cg08013557 | ZIC4;ZIC4;ZIC4                       | 2.58E-05    | 0.379625469 |
| cg19156875 | MAPT;MAPT;MAPT;MAPT;LOC100130148;MAP | 2.58E-05    | 0.379603174 |
| cg22898797 |                                      | 0.000791389 | 0.379598821 |
| cg13920367 | CDH1                                 | 8.60E-06    | 0.379565579 |
| cg17240815 | HCRTR2;HCRTR2                        | 0.000187194 | 0.379539281 |
| cg20115218 | ANO5;ANO5;ANO5;ANO5                  | 1.11E-05    | 0.379529305 |
| cg24150172 | SOX17                                | 0.000357885 | 0.379501528 |
| cg15919816 |                                      | 2.58E-05    | 0.379489256 |
| cg19875547 | AMPH;AMPH                            | 0.000187194 | 0.379476975 |
| cg11899535 | WBSCR17                              | 0.000187194 | 0.37947658  |
| cg14618638 | GALNT11                              | 0.000537905 | 0.379473474 |
| cg08668551 |                                      | 0.000117986 | 0.379458698 |
| cg05571970 |                                      | 1.50E-05    | 0.379434419 |
| cg02539083 | TAC1;TAC1;TAC1;TAC1                  | 1.11E-05    | 0.379427435 |
| cg23625660 | FBXL21                               | 8.60E-06    | 0.379418139 |
| cg07650252 | KCTD8                                | 5.59E-05    | 0.379416459 |
| cg25044651 | LVRN                                 | 1.50E-05    | 0.379406059 |
| cg08855395 |                                      | 0.000187194 | 0.379402732 |
| cg27255275 | NFRKB                                | 2.58E-05    | 0.37939059  |
| cg24755910 | C7orf63;C7orf63                      | 7.23E-05    | 0.379384369 |
| cg06674731 | RPRM                                 | 0.000117986 | 0.379355853 |
| cg19152508 | MKX                                  | 1.50E-05    | 0.379343535 |
| cg04859706 | PCDH7;PCDH7;PCDH7                    | 0.000357885 | 0.379328554 |
| cg02140579 | FAM198B;FAM198B;FAM198B              | 5.59E-05    | 0.379244628 |
| cg00977827 |                                      | 0.001147425 | 0.379198824 |
| cg07645844 | ADRA1A;ADRA1A;ADRA1A;ADRA1A;ADRA1A;  | 1.50E-05    | 0.379195497 |
| cg12678686 | MCM2                                 | 0.000654035 | 0.379186086 |
| cg20692998 |                                      | 4.34E-05    | 0.379174859 |

|            |                                      |             |             |
|------------|--------------------------------------|-------------|-------------|
| cg11769332 | DLX4;DLX4                            | 8.60E-06    | 0.379164054 |
| cg12398124 | GALNT13                              | 3.34E-05    | 0.379164049 |
| cg10020520 | SETD1A                               | 3.34E-05    | 0.379131658 |
| cg02879423 | WDFY1                                | 7.23E-05    | 0.379127437 |
| cg26789779 | GDNF                                 | 0.00043997  | 0.379124814 |
| cg04316624 | HOXD3                                | 3.34E-05    | 0.379123209 |
| cg18672939 | GFRA1;GFRA1;GFRA1;GFRA1              | 0.000791389 | 0.379122607 |
| cg11026333 | LRR61;ACTR3C;LRR61                   | 0.000526175 | 0.379102169 |
| cg24049616 | IRX6                                 | 3.34E-05    | 0.379099282 |
| cg22368262 | C10orf35                             | 0.000791389 | 0.379053731 |
| cg04606861 | GALNT9                               | 0.000148457 | 0.379021412 |
| cg03940966 | THEM4                                | 3.34E-05    | 0.379016256 |
| cg21347353 |                                      | 3.34E-05    | 0.379015567 |
| cg02505827 | MARVELD2;MARVELD2                    | 1.96E-05    | 0.379000559 |
| cg19703610 | DSCAML1                              | 1.96E-05    | 0.378959923 |
| cg14169158 | FAM78B                               | 5.59E-05    | 0.378944149 |
| cg06951626 |                                      | 1.11E-05    | 0.378915278 |
| cg25964728 | TMEM22;TMEM22;TMEM22                 | 0.000537905 | 0.378912841 |
| cg13099890 | LOC283392;LOC283392;TRHDE            | 9.24E-05    | 0.378910008 |
| cg05065507 | TACSTD2;TACSTD2                      | 0.000148457 | 0.378874899 |
| cg16182148 | TMEM101                              | 7.23E-05    | 0.378870432 |
| cg17891759 |                                      | 2.58E-05    | 0.378868684 |
| cg24939838 | PRDM16;PRDM16                        | 3.34E-05    | 0.378858475 |
| cg13845982 | GATA5                                | 0.000955793 | 0.378844956 |
| cg09644707 |                                      | 2.58E-05    | 0.378835492 |
| cg07963234 | CRMP1                                | 0.000233422 | 0.378827813 |
| cg12838192 | C4orf31;C4orf31                      | 1.11E-05    | 0.378809372 |
| cg06494592 |                                      | 0.000955793 | 0.378799147 |
| cg09220326 | CDCP1;CDCP1                          | 2.58E-05    | 0.378798833 |
| cg07924892 | MOCOS                                | 3.34E-05    | 0.378798615 |
| cg01938018 | NPHS2                                | 3.34E-05    | 0.378764251 |
| cg00359365 | MIR1976;RPS6KA1;RPS6KA1              | 0.001948248 | 0.378757959 |
| cg06076277 |                                      | 8.60E-06    | 0.378752729 |
| cg02179499 | FGFR2;FGFR2;FGFR2;FGFR2;FGFR2        | 2.58E-05    | 0.378744475 |
| cg03545227 | PTPRN                                | 1.11E-05    | 0.378741413 |
| cg16145703 | XKR6                                 | 0.001147425 | 0.378715304 |
| cg05872073 | PARD6G                               | 0.00043997  | 0.378711125 |
| cg25496181 | KSR2                                 | 0.000791389 | 0.378699277 |
| cg26023087 |                                      | 2.58E-05    | 0.378685293 |
| cg05634149 |                                      | 0.000233422 | 0.378683059 |
| cg27361914 | KLK13                                | 2.58E-05    | 0.378672303 |
| cg25151919 | ZNF502;ZNF502;ZNF502;ZNF502          | 0.000148457 | 0.37864216  |
| cg00002810 | DAB1                                 | 9.24E-05    | 0.37863745  |
| cg25249539 |                                      | 0.000290372 | 0.378621844 |
| cg03969305 |                                      | 2.58E-05    | 0.378611184 |
| cg21683708 |                                      | 0.001147425 | 0.378556304 |
| cg02533787 | LYPD6B;LYPD6B                        | 0.000148457 | 0.378546776 |
| cg21646199 | NHLH2;NHLH2                          | 3.34E-05    | 0.378543206 |
| cg20405893 | CHAT;CHAT;CHAT;CHAT;CHAT;CHAT;CHAT;C | 2.08E-05    | 0.378523928 |
| cg16325502 | CCDC140                              | 1.50E-05    | 0.378523778 |
| cg04677123 |                                      | 0.000233422 | 0.378522824 |
| cg02664109 |                                      | 0.002304201 | 0.378516485 |
| cg06917763 |                                      | 2.58E-05    | 0.378496884 |
| cg03843000 | TBX5;TBX5                            | 1.96E-05    | 0.378478911 |
| cg11667754 | CDH1                                 | 4.34E-05    | 0.378472831 |
| cg10863741 | TMEM155;TMEM155;LOC100192379         | 0.000233422 | 0.378456217 |
| cg08529049 | CWH43                                | 1.50E-05    | 0.378436587 |
| cg03599078 |                                      | 0.000290372 | 0.37842707  |
| cg08891110 |                                      | 2.58E-05    | 0.378416676 |
| cg15647515 | WNT2;WNT2                            | 3.34E-05    | 0.378406712 |

|            |                               |             |             |
|------------|-------------------------------|-------------|-------------|
| cg26021627 | FAM150A                       | 1.50E-05    | 0.378405095 |
| cg25637722 | CRB3;CRB3                     | 5.59E-05    | 0.378389518 |
| cg03440125 | TPBG;TPBG                     | 0.000233422 | 0.378388697 |
| cg14646075 | WDR69                         | 1.50E-05    | 0.378388393 |
| cg02979001 |                               | 0.00041966  | 0.378384625 |
| cg20504791 | FOXA2;FOXA2                   | 0.001147425 | 0.378384538 |
| cg19579167 | EPB41L3                       | 0.000148457 | 0.378373179 |
| cg17408527 | ZSCAN18;ZSCAN18               | 8.60E-06    | 0.378340352 |
| cg16234557 | EMX2OS                        | 7.23E-05    | 0.378324027 |
| cg15341350 | SRRM4                         | 9.24E-05    | 0.378322809 |
| cg14059768 |                               | 0.000148457 | 0.378303382 |
| cg22957381 | KCND3;KCND3                   | 0.000233422 | 0.378263323 |
| cg16729160 | KCNB2                         | 5.59E-05    | 0.378262977 |
| cg26082257 |                               | 2.58E-05    | 0.378253547 |
| cg20978694 | NAT8L                         | 0.000148457 | 0.378249112 |
| cg15624813 |                               | 0.000791389 | 0.378231112 |
| cg17303756 |                               | 5.59E-05    | 0.378230525 |
| cg13777717 | CRHBP                         | 0.000233422 | 0.378226072 |
| cg21696012 | HMGCL;HMGCL                   | 0.000117986 | 0.378224909 |
| cg18116154 | NMNAT3                        | 0.000654035 | 0.378220411 |
| cg19780993 |                               | 7.23E-05    | 0.37821515  |
| cg09881545 |                               | 0.000187194 | 0.378211362 |
| cg11804724 | DNAH14;DNAH14;DNAH14          | 1.96E-05    | 0.378197522 |
| cg03325733 | RAB32                         | 0.000233422 | 0.378194088 |
| cg14342850 |                               | 0.000233422 | 0.378186291 |
| cg17456678 |                               | 3.34E-05    | 0.378181843 |
| cg25352836 | TSSK6;TSSK6                   | 3.34E-05    | 0.378159367 |
| cg09382096 | PAX6;PAX6;PAX6                | 7.23E-05    | 0.378156728 |
| cg13902210 | KCNC4;KCNC4;KCNC4             | 7.23E-05    | 0.378151193 |
| cg17071446 |                               | 3.34E-05    | 0.378145211 |
| cg07409471 | TBCD                          | 2.58E-05    | 0.378125181 |
| cg12999636 |                               | 0.000187194 | 0.378111296 |
| cg09152582 |                               | 8.60E-06    | 0.378087598 |
| cg02435083 |                               | 0.000233422 | 0.378077373 |
| cg10325478 | KCNK10;KCNK10                 | 9.24E-05    | 0.37805543  |
| cg20171396 |                               | 1.96E-05    | 0.37804798  |
| cg19229182 |                               | 1.11E-05    | 0.378040941 |
| cg09497644 | WDR72                         | 1.96E-05    | 0.378037217 |
| cg16163847 | WDFY2                         | 0.000187194 | 0.378036841 |
| cg18173058 | TBX5;TBX5;TBX5;TBX5           | 0.000148457 | 0.377976034 |
| cg05804863 | KIAA1024                      | 0.000117986 | 0.377948514 |
| cg10858945 |                               | 5.59E-05    | 0.377934554 |
| cg07319315 | MGAT5                         | 7.23E-05    | 0.377934432 |
| cg15410418 | PDE4D                         | 0.000117986 | 0.377910069 |
| cg18044383 |                               | 0.004357816 | 0.377906445 |
| cg23679471 |                               | 1.11E-05    | 0.37790325  |
| cg10528576 | DLK1                          | 3.34E-05    | 0.377897091 |
| cg12468478 | TCF21;TCF21;TCF21;TCF21       | 0.000117986 | 0.377881579 |
| cg01775414 | PHF21B;PHF21B                 | 2.58E-05    | 0.377874755 |
| cg11723801 | NES                           | 0.000148457 | 0.377869667 |
| cg10189695 | GPR78;GPR78                   | 1.50E-05    | 0.377868668 |
| cg15044453 | MTHFD1L                       | 9.24E-05    | 0.377861939 |
| cg14421860 | GPR88                         | 0.002714607 | 0.377856907 |
| cg09550809 | BHMT                          | 2.58E-05    | 0.377850231 |
| cg02248826 | TJP1;TJP1                     | 8.60E-06    | 0.37784241  |
| cg11855325 | SCRN1;SCRN1;SCRN1;SCRN1;SCRN1 | 9.24E-05    | 0.377837762 |
| cg23687194 | ID4                           | 0.000187194 | 0.377825736 |
| cg10541755 | EIF5A2                        | 5.59E-05    | 0.377804073 |
| cg24738611 | WDR43;SNORD53                 | 1.50E-05    | 0.377785885 |
| cg14026459 | ELAVL2;ELAVL2;ELAVL2          | 1.96E-05    | 0.377771962 |

|            |                                     |             |             |
|------------|-------------------------------------|-------------|-------------|
| cg15479068 | SYN3                                | 1.96E-05    | 0.377762387 |
| cg01140006 | GPR97                               | 2.08E-05    | 0.377761148 |
| cg25437385 | SLC35F3                             | 1.96E-05    | 0.377749402 |
| cg09763175 | PRKAA2                              | 0.000654035 | 0.377740392 |
| cg11557382 |                                     | 9.24E-05    | 0.377736422 |
| cg14270857 | HPSE2;HPSE2;HPSE2;HPSE2             | 9.24E-05    | 0.377725456 |
| cg12929755 | CALCR;CALCR                         | 4.34E-05    | 0.377705307 |
| cg20910102 | CA8                                 | 0.000791389 | 0.377696043 |
| cg24792289 |                                     | 7.23E-05    | 0.377693979 |
| cg17144108 | GIPR                                | 3.34E-05    | 0.377693282 |
| cg21282630 | CYYR1                               | 0.000233422 | 0.377689675 |
| cg04858164 | TCF12;TCF12;TCF12;TCF12             | 7.23E-05    | 0.377683273 |
| cg18268988 | TIMM8B;SDHD;TIMM8B                  | 1.11E-05    | 0.37767941  |
| cg19389953 |                                     | 8.60E-06    | 0.377669963 |
| cg03352287 | CRCT1                               | 0.000357885 | 0.377667142 |
| cg06792417 |                                     | 1.11E-05    | 0.377663137 |
| cg23083277 | COL29A1;COL29A1                     | 7.23E-05    | 0.377660433 |
| cg17543296 | FAM43B                              | 0.000117986 | 0.377659254 |
| cg23170439 |                                     | 8.60E-06    | 0.37765385  |
| cg23686403 | PARD6G                              | 0.00043997  | 0.37762715  |
| cg05448721 |                                     | 4.34E-05    | 0.377626744 |
| cg07930539 |                                     | 0.000233422 | 0.377616109 |
| cg00929635 | DBNDD2;DBNDD2;DBNDD2;DBNDD2;SYS1-DB | 0.000233422 | 0.377610876 |
| cg00893493 | MCOLN3                              | 4.01E-05    | 0.37755795  |
| cg15939347 | TSNARE1                             | 0.002304201 | 0.377547034 |
| cg12387700 | MCOLN3;MCOLN3                       | 0.000148457 | 0.377539404 |
| cg24446586 | HOXA11AS;HOXA11                     | 0.000357885 | 0.377539097 |
| cg00581731 | NPAS2                               | 0.000290372 | 0.377537378 |
| cg00214791 |                                     | 7.23E-05    | 0.377515269 |
| cg02146001 | GATA5                               | 0.000148457 | 0.377509229 |
| cg18252309 | DPP6                                | 1.11E-05    | 0.377502007 |
| cg20467957 |                                     | 8.60E-06    | 0.377481028 |
| cg12798157 | AKR7L;AKR7L                         | 0.000233422 | 0.377477602 |
| cg02843349 |                                     | 1.96E-05    | 0.377460929 |
| cg04756491 | RBM23;RBM23;RBM23                   | 0.00043997  | 0.377446837 |
| cg13134916 | IFLTD1;IFLTD1;IFLTD1;IFLTD1;IFLTD1  | 0.001639597 | 0.377438721 |
| cg07033722 | PPT1;PPT1                           | 0.000357885 | 0.37739389  |
| cg12063992 | PTPN9                               | 0.001948248 | 0.377390336 |
| cg20864608 |                                     | 0.000290372 | 0.377388241 |
| cg27308021 | C16orf73;C16orf73                   | 1.96E-05    | 0.377380462 |
| cg06133110 | SCRN1;SCRN1;SCRN1;SCRN1             | 5.59E-05    | 0.377375243 |
| cg22121557 |                                     | 0.000233422 | 0.377362676 |
| cg08211028 |                                     | 0.00043997  | 0.377356531 |
| cg19730691 | TBX15                               | 3.34E-05    | 0.377351556 |
| cg06966839 | MSI2;MSI2                           | 2.58E-05    | 0.377345165 |
| cg17566735 | PLD1;PLD1                           | 0.001147425 | 0.377340284 |
| cg01701649 | N4BP1                               | 8.60E-06    | 0.377333465 |
| cg00745606 |                                     | 4.34E-05    | 0.377330375 |
| cg22162281 | ZDBF2                               | 0.000117986 | 0.377324932 |
| cg21091227 |                                     | 8.60E-06    | 0.377323367 |
| cg26357587 | POU2F3                              | 0.000791389 | 0.377299243 |
| cg25356504 | SARM1                               | 0.009066563 | 0.377290514 |
| cg19054524 | PAX1                                | 7.23E-05    | 0.377288973 |
| cg03087912 |                                     | 0.000791389 | 0.377264711 |
| cg10349436 | FHL2;FHL2;FHL2;FHL2                 | 1.50E-05    | 0.377261036 |
| cg22052659 | CSMD3;CSMD3                         | 0.000654035 | 0.377229968 |
| cg03338754 | F7;F7                               | 2.58E-05    | 0.377205046 |
| cg01571735 | SP5                                 | 0.000357885 | 0.377204968 |
| cg10769146 |                                     | 4.34E-05    | 0.377175127 |
| cg04919592 | IQCE;IQCE                           | 1.50E-05    | 0.377175122 |



|            |                                    |             |             |
|------------|------------------------------------|-------------|-------------|
| cg23568192 |                                    | 0.002304201 | 0.37717387  |
| cg06575035 | PCDHGA4;PCDHGA2;PCDHGA5;PCDHGB2;PC | 8.60E-06    | 0.377154894 |
| cg00741624 | KIAA1409                           | 0.000187194 | 0.377153676 |
| cg13500720 | AKAP12;AKAP12                      | 0.000233422 | 0.377149347 |
| cg04915300 | GPD2;GPD2                          | 3.21E-05    | 0.377130962 |
| cg17932911 | ERLIN1;ERLIN1                      | 2.58E-05    | 0.377112091 |
| cg17339147 | WNT2;WNT2                          | 8.60E-06    | 0.377101423 |
| cg18440897 | GABRA2;GABRA2                      | 1.96E-05    | 0.377023651 |
| cg11667258 |                                    | 0.000290372 | 0.377016992 |
| cg13469851 | PLAA                               | 4.34E-05    | 0.376991608 |
| cg17705041 | PCGF3                              | 1.11E-05    | 0.376965896 |
| cg21167269 |                                    | 1.50E-05    | 0.376961383 |
| cg04790084 | TMEM132E;C17orf102                 | 0.00043997  | 0.37693239  |
| cg05965863 |                                    | 8.60E-06    | 0.376923385 |
| cg09591286 | ZNF804B                            | 0.000654035 | 0.376918986 |
| cg07339783 |                                    | 3.34E-05    | 0.376895861 |
| cg19803052 | TMEM196                            | 4.34E-05    | 0.376887011 |
| cg07935784 |                                    | 1.11E-05    | 0.376859285 |
| cg02135245 | ABR;ABR;ABR                        | 1.96E-05    | 0.376859209 |
| cg19897071 | UGT3A1;UGT3A1                      | 4.34E-05    | 0.376846621 |
| cg18450420 | FAM107B                            | 4.34E-05    | 0.376839224 |
| cg25340098 |                                    | 9.24E-05    | 0.376833187 |
| cg12806613 |                                    | 5.59E-05    | 0.376827664 |
| cg00376544 | FBXO39                             | 0.001147425 | 0.376813787 |
| cg21189727 | LRRC67                             | 0.000290372 | 0.376796461 |
| cg20296343 | ZNF876P                            | 1.50E-05    | 0.376795956 |
| cg08231189 | MKX                                | 1.50E-05    | 0.376789275 |
| cg01923724 |                                    | 1.50E-05    | 0.376789035 |
| cg09481404 |                                    | 9.24E-05    | 0.376769539 |
| cg07447922 | EPHA10;EPHA10                      | 5.59E-05    | 0.376733252 |
| cg08739188 | SV2C                               | 1.11E-05    | 0.376733225 |
| cg17777676 | PCDHA2;PCDHA1;PCDHA1;PCDHA4;PCDHA3 | 2.58E-05    | 0.376712259 |
| cg01450705 | CPLX2;CPLX2                        | 7.23E-05    | 0.376691389 |
| cg15613048 | KIF17;KIF17                        | 9.24E-05    | 0.376677987 |
| cg24632241 | CTNNA2;LRRTM1;CTNNA2               | 0.000187194 | 0.376677795 |
| cg20056634 | MEIS1                              | 0.000233422 | 0.376657871 |
| cg23599224 |                                    | 1.11E-05    | 0.376647996 |
| cg09238992 |                                    | 8.60E-06    | 0.3766383   |
| cg05475524 | ACTN3                              | 0.000357885 | 0.37661398  |
| cg07661818 | CLDN1                              | 0.000791389 | 0.376590152 |
| cg01301637 | WNT7A                              | 0.000148457 | 0.376557437 |
| cg26532358 | SLC35F1;SLC35F1                    | 1.11E-05    | 0.376542753 |
| cg17871749 | POU4F3;POU4F3                      | 8.60E-06    | 0.376523004 |
| cg19684783 |                                    | 0.000290372 | 0.37652066  |
| cg21829923 | SP5                                | 4.34E-05    | 0.376514348 |
| cg11151395 | MPO                                | 9.24E-05    | 0.376496038 |
| cg20918128 | ART5;ART5                          | 0.000117986 | 0.376480547 |
| cg10509254 | NBLA00301;HAND2                    | 8.60E-06    | 0.376477139 |
| cg14562158 | TNC                                | 1.96E-05    | 0.376475957 |
| cg21353911 |                                    | 1.96E-05    | 0.37646393  |
| cg23206209 | ONECUT1                            | 1.11E-05    | 0.376462704 |
| cg03133735 |                                    | 0.000654035 | 0.376415863 |
| cg16132337 |                                    | 0.000117986 | 0.376412604 |
| cg21882477 | STK32A;STK32A                      | 8.60E-06    | 0.376406364 |
| cg22489153 |                                    | 8.60E-06    | 0.376390844 |
| cg05563672 | TMPRSS2;TMPRSS2;TMPRSS2            | 0.000955793 | 0.376382545 |
| cg19523085 | ADAMTS5                            | 5.59E-05    | 0.376379761 |
| cg14619949 | F2RL1                              | 0.0050758   | 0.376378556 |
| cg21461649 | CFTR                               | 2.58E-05    | 0.376367829 |
| cg04835297 | TRPC1                              | 0.000148457 | 0.376365923 |

|            |                                       |             |             |
|------------|---------------------------------------|-------------|-------------|
| cg01871214 |                                       | 0.000117986 | 0.376359674 |
| cg26071526 | TACC2;TACC2;TACC2;TACC2;TACC2;TACC2   | 5.59E-05    | 0.376327547 |
| cg06580033 | ZNF830;CCT6B                          | 1.50E-05    | 0.376303513 |
| cg17745088 |                                       | 0.00043997  | 0.376284003 |
| cg02111748 | PLEKHH2;LOC728819                     | 0.000654035 | 0.37627088  |
| cg06158650 | TBX15                                 | 8.60E-06    | 0.376259356 |
| cg09424759 | SLC35F3;SLC35F3                       | 1.11E-05    | 0.376257011 |
| cg06365303 |                                       | 0.000117986 | 0.376252767 |
| cg01471196 | ZNF334;ZNF334;ZNF334;ZNF334           | 1.96E-05    | 0.376215765 |
| cg09258813 | ADRB3                                 | 0.000955793 | 0.376191622 |
| cg18998138 | GULP1                                 | 1.11E-05    | 0.376191557 |
| cg08164556 | CACNG4                                | 5.59E-05    | 0.376169845 |
| cg05919561 | TTLL7                                 | 0.001948248 | 0.376161354 |
| cg24818200 | PCDHB4                                | 1.50E-05    | 0.376149446 |
| cg05628549 | PRKCDBP                               | 9.24E-05    | 0.37608641  |
| cg01396176 |                                       | 8.60E-06    | 0.376081578 |
| cg01076272 |                                       | 2.58E-05    | 0.376062141 |
| cg11871421 | FBXO39                                | 5.59E-05    | 0.376057713 |
| cg09254939 | KLK10;KLK10;KLK10                     | 4.34E-05    | 0.376044827 |
| cg05803237 | MTNR1B                                | 1.11E-05    | 0.376041372 |
| cg04595562 |                                       | 1.50E-05    | 0.376027968 |
| cg24107021 | DZIP1;DZIP1                           | 1.50E-05    | 0.376019492 |
| cg00134776 | CLSTN2                                | 2.58E-05    | 0.376017281 |
| cg18624900 | SLC16A12                              | 0.000187194 | 0.376004939 |
| cg06226283 | RELN;RELN                             | 8.60E-06    | 0.375999559 |
| cg03748503 |                                       | 0.000117986 | 0.375989517 |
| cg09701702 |                                       | 0.000187194 | 0.375974537 |
| cg19356022 | SHC1;SHC1;SHC1;SHC1                   | 0.000187194 | 0.375968333 |
| cg25814649 | EFNB2                                 | 0.000290372 | 0.375947185 |
| cg02388865 | LIN28;LIN28                           | 3.34E-05    | 0.375942115 |
| cg18634506 | BUD31;PDAP1                           | 9.24E-05    | 0.375907871 |
| cg23840223 | NMU                                   | 0.000148457 | 0.375894874 |
| cg00889398 |                                       | 8.60E-06    | 0.375887691 |
| cg04761653 | FAM46A                                | 4.34E-05    | 0.375861288 |
| cg27579609 | HTR6                                  | 8.60E-06    | 0.375857223 |
| cg22558291 | LOC646405                             | 0.000290372 | 0.375829296 |
| cg05214685 |                                       | 2.58E-05    | 0.375820754 |
| cg13652008 | LTBP1;LTBP1;LTBP1;LTBP1;LTBP1         | 2.58E-05    | 0.375818758 |
| cg02392124 | WAC;WAC;WAC                           | 7.23E-05    | 0.375810869 |
| cg11044575 |                                       | 8.60E-06    | 0.375809431 |
| cg02283366 |                                       | 0.000334462 | 0.375808381 |
| cg26590003 |                                       | 0.00043997  | 0.375803833 |
| cg11439596 |                                       | 0.002304201 | 0.375791743 |
| cg17790605 | KCTD8                                 | 0.002304201 | 0.375753121 |
| cg16745596 | SYCN                                  | 0.000148457 | 0.375741319 |
| cg18596362 | CBLN2                                 | 0.000290372 | 0.375717886 |
| cg00060320 | KY                                    | 5.59E-05    | 0.375717279 |
| cg02365514 | MAPK15;MAPK15                         | 2.58E-05    | 0.375681069 |
| cg13460556 | ABHD2;ABHD2                           | 4.34E-05    | 0.375673612 |
| cg04851268 | GHSR;GHSR                             | 0.00043997  | 0.375670343 |
| cg03414569 | EHHADH;EHHADH;EHHADH                  | 0.001376172 | 0.375666711 |
| cg01960016 | MSX2                                  | 8.60E-06    | 0.375656544 |
| cg06145336 | HOXD3                                 | 4.34E-05    | 0.375648227 |
| cg01572513 |                                       | 0.000791389 | 0.375631428 |
| cg18004847 | SBNO2                                 | 3.34E-05    | 0.375619545 |
| cg08414087 |                                       | 9.24E-05    | 0.375618927 |
| cg04271218 | C8orf85                               | 8.60E-06    | 0.37560824  |
| cg10035294 | PAX3;PAX3;PAX3;PAX3;PAX3;CCDC140;PAX3 | 3.34E-05    | 0.375597708 |
| cg13344169 | SSTR2;SSTR2                           | 1.96E-05    | 0.375591242 |
| cg13885357 | KRT3                                  | 0.003189589 | 0.375575965 |

|            |                    |             |             |
|------------|--------------------|-------------|-------------|
| cg12636435 |                    | 4.34E-05    | 0.375575244 |
| cg07110356 | MPO                | 0.000357885 | 0.375565446 |
| cg05706117 | EGFLAM             | 4.34E-05    | 0.375558017 |
| cg01450642 | RGS20;RGS20;RGS20  | 0.000117986 | 0.375541212 |
| cg03318469 | LRRC47             | 0.000148457 | 0.375540098 |
| cg15722404 | PPARG;PPARG;PPARG  | 0.000290372 | 0.375527518 |
| cg12058064 | KLHL25;MIR1276     | 1.96E-05    | 0.375526514 |
| cg22371492 | PRRX1;PRRX1        | 9.24E-05    | 0.375524982 |
| cg21348997 | ARNT2;ARNT2        | 0.000537905 | 0.375511237 |
| cg11654179 | DTX3               | 0.000148457 | 0.375507461 |
| cg14558431 | C9orf170           | 0.000955793 | 0.375506616 |
| cg18121355 | GDNF               | 0.000537905 | 0.375503004 |
| cg14907769 |                    | 0.000187194 | 0.375492773 |
| cg07557560 | CXCL14;CXCL14      | 5.59E-05    | 0.37548793  |
| cg01796438 | ATG7;ATG7;ATG7     | 7.23E-05    | 0.375485036 |
| cg25644243 | WDR72              | 0.000233422 | 0.375425393 |
| cg24748769 | OTX2;OTX2          | 1.96E-05    | 0.375409769 |
| cg09303701 | WDR35;WDR35        | 0.000148457 | 0.375409285 |
| cg15168727 |                    | 2.58E-05    | 0.375401983 |
| cg12396325 | RIMS2;RIMS2        | 0.000148457 | 0.375372586 |
| cg08721908 | ANKRD20B           | 1.11E-05    | 0.37536311  |
| cg26279070 |                    | 1.96E-05    | 0.375326934 |
| cg03896836 | KIF1A              | 1.50E-05    | 0.375315996 |
| cg22799499 | COL9A2             | 1.96E-05    | 0.375249502 |
| cg19389884 |                    | 0.000148457 | 0.375248169 |
| cg20599967 |                    | 2.58E-05    | 0.375237284 |
| cg06838985 | TRPC6              | 8.60E-06    | 0.375234614 |
| cg04573550 | SSTR1              | 0.000148457 | 0.375217683 |
| cg23528705 | UNCX               | 4.34E-05    | 0.375215082 |
| cg14742445 | ASCC2              | 0.000290372 | 0.375196983 |
| cg15409931 | WTIP               | 0.000233422 | 0.375191877 |
| cg08235161 |                    | 0.000654035 | 0.375186339 |
| cg00280177 |                    | 0.000537905 | 0.375183725 |
| cg12377139 | SPAG6;SPAG6        | 7.23E-05    | 0.375176063 |
| cg16051954 | CABC1              | 0.000866489 | 0.375172976 |
| cg24975222 | CDCP1;CDCP1        | 0.000187194 | 0.375140276 |
| cg05696969 | SH3RF2             | 7.23E-05    | 0.375137703 |
| cg13767940 | MIR34B;BTG4;MIR34C | 0.000537905 | 0.375134507 |
| cg26688582 |                    | 0.000148457 | 0.375132468 |
| cg15191648 | SALL3              | 1.50E-05    | 0.375131126 |
| cg17293161 |                    | 0.000148457 | 0.375128575 |
| cg01962676 | IGSF21             | 2.58E-05    | 0.375103558 |
| cg24319381 | CPEB1              | 9.24E-05    | 0.375099043 |
| cg06489037 |                    | 4.34E-05    | 0.37508401  |
| cg08534016 | SPEF2              | 3.34E-05    | 0.375063167 |
| cg16396191 | KIAA0564           | 0.000233422 | 0.375034551 |
| cg23685712 | CYP24A1;CYP24A1    | 5.59E-05    | 0.375032028 |
| cg17279359 | USH1C;USH1C        | 3.34E-05    | 0.375012939 |
| cg26705960 | PGR                | 0.000365373 | 0.375010387 |
| cg00703513 |                    | 1.96E-05    | 0.375001173 |
| cg19310908 | HIF3A              | 0.00043997  | 0.375000219 |
| cg24054190 | FGF12              | 3.34E-05    | 0.374994217 |
| cg04427498 |                    | 8.60E-06    | 0.374981108 |
| cg20008332 | SOX11              | 0.001948248 | 0.374979541 |
| cg18358894 |                    | 4.34E-05    | 0.374977204 |
| cg08377331 | GNA12              | 0.000187194 | 0.374963688 |
| cg12658947 | OPCML              | 0.000233422 | 0.374952822 |
| cg11638181 | MIR129-2           | 9.24E-05    | 0.374946182 |
| cg02071243 |                    | 2.58E-05    | 0.37494321  |
| cg03858673 |                    | 4.34E-05    | 0.374919123 |

|            |                                    |             |             |
|------------|------------------------------------|-------------|-------------|
| cg27622506 | THRB;THRB;THRB                     | 0.000791389 | 0.37491683  |
| cg14319235 | ELTD1                              | 0.000117986 | 0.374914375 |
| cg09712683 | MAL;MAL;MAL;MAL                    | 1.11E-05    | 0.374900784 |
| cg11849281 |                                    | 8.60E-06    | 0.374897129 |
| cg19725903 | PLBD1                              | 2.58E-05    | 0.374886755 |
| cg01568998 | PREX2;PREX2                        | 2.58E-05    | 0.374858236 |
| cg21657087 |                                    | 4.34E-05    | 0.374856604 |
| cg09273112 | VPS24;VPS24                        | 1.50E-05    | 0.374840769 |
| cg25493589 | CCK                                | 8.60E-06    | 0.374811949 |
| cg27436995 | FBXL16                             | 0.0050758   | 0.374805857 |
| cg22041640 | PCDHGA4;PCDHGA6;PCDHGA1;PCDHGA5;PC | 5.59E-05    | 0.374803898 |
| cg16925499 | HSPA12A                            | 9.24E-05    | 0.374800178 |
| cg10725937 | TREM2                              | 0.000290372 | 0.37479509  |
| cg26770907 |                                    | 2.58E-05    | 0.374786544 |
| cg03722052 | TPBG;TPBG                          | 0.000290372 | 0.374775295 |
| cg17406148 | RUNDC3B;RUNDC3B;ABCB1;RUNDC3B      | 4.34E-05    | 0.374761553 |
| cg23193365 | EPA5;EPA5                          | 9.24E-05    | 0.374737363 |
| cg08323651 | CHRM2;CHRM2;CHRM2;CHRM2;CHRM2;CHR  | 4.34E-05    | 0.374724071 |
| cg03536474 | HOXC11                             | 0.002714607 | 0.374704669 |
| cg10068300 | GNAL;GNAL;GNAL;GNAL                | 2.58E-05    | 0.374702103 |
| cg17044159 |                                    | 2.58E-05    | 0.37468703  |
| cg19802865 | FOXA1                              | 0.001948248 | 0.374685561 |
| cg20509513 | TACC2;TACC2;TACC2;TACC2            | 8.60E-06    | 0.374649339 |
| cg18477204 | C14orf162                          | 7.23E-05    | 0.374633135 |
| cg05376228 | SBNO2;SBNO2                        | 0.000148457 | 0.37462689  |
| cg13900773 | PIWIL1                             | 0.002714607 | 0.374623296 |
| cg02237629 |                                    | 9.24E-05    | 0.374620796 |
| cg13011109 | FBLL1                              | 3.34E-05    | 0.374617989 |
| cg02289992 | FAM164A;FAM164A                    | 0.000262362 | 0.374615491 |
| cg11429969 | PCDHA2;PCDHA1;PCDHA3;PCDHA3;PCDHA1 | 8.60E-06    | 0.374607595 |
| cg11243196 | ADAMTS3                            | 0.000654035 | 0.374594777 |
| cg01449136 |                                    | 8.60E-06    | 0.374591669 |
| cg20464804 | SYN3                               | 2.58E-05    | 0.374588644 |
| cg05398700 | WDR20                              | 3.34E-05    | 0.374532715 |
| cg00295794 |                                    | 0.000187194 | 0.374529647 |
| cg15482122 | C14orf23;C14orf23                  | 0.000357885 | 0.374525095 |
| cg00861497 |                                    | 4.34E-05    | 0.374522642 |
| cg10404336 | LYNX1;LYNX1;LYNX1;LYNX1            | 5.59E-05    | 0.374491402 |
| cg19396601 | GPR123                             | 3.34E-05    | 0.374490064 |
| cg15527515 | SLC7A8                             | 0.00043997  | 0.374489067 |
| cg09142313 |                                    | 0.001376172 | 0.374482482 |
| cg17071639 | FEZ1;FEZ1                          | 0.000233422 | 0.374460884 |
| cg16079958 | MAP1B                              | 0.000537905 | 0.374451064 |
| cg10501704 | PRKD1                              | 3.34E-05    | 0.374440432 |
| cg12136608 | LRRN1                              | 0.000187194 | 0.374439416 |
| cg04407248 | PRSS8                              | 1.11E-05    | 0.374430685 |
| cg23188704 |                                    | 3.34E-05    | 0.374401742 |
| cg00011346 | ERBB4;ERBB4                        | 9.24E-05    | 0.374396178 |
| cg05574357 |                                    | 8.60E-06    | 0.374385714 |
| cg14603040 |                                    | 3.34E-05    | 0.374347692 |
| cg06638795 | KCNG3;KCNG3                        | 9.24E-05    | 0.374338413 |
| cg23697417 | RSPO4;RSPO4                        | 5.59E-05    | 0.374301978 |
| cg19879906 |                                    | 1.11E-05    | 0.374289046 |
| cg13435649 |                                    | 8.60E-06    | 0.374279568 |
| cg07468327 |                                    | 3.34E-05    | 0.374278373 |
| cg18867480 | BDNF                               | 5.59E-05    | 0.374264917 |
| cg09465698 | PCDHGA4;PCDHGA6;PCDHGB6;PCDHGA9;PC | 7.23E-05    | 0.374255897 |
| cg04910690 | CD164L2                            | 0.000357885 | 0.374236178 |
| cg18689332 | TBX5;TBX5;TBX5;TBX5                | 2.58E-05    | 0.374234026 |
| cg11082362 | INSM2                              | 0.000955793 | 0.374232741 |

|            |                               |             |             |
|------------|-------------------------------|-------------|-------------|
| cg02021919 | CCNH                          | 0.000537905 | 0.374212778 |
| cg07598549 | DLX6AS;DLX6                   | 0.001639597 | 0.374206356 |
| cg09347413 |                               | 0.000791389 | 0.374201004 |
| cg23910786 | MYO5B;MYO5B                   | 9.24E-05    | 0.374168383 |
| cg09699039 | SLC35F1                       | 8.60E-06    | 0.374147933 |
| cg00998387 |                               | 1.11E-05    | 0.374145997 |
| cg18016194 | RALYL;RALYL;RALYL;RALYL;RALYL | 0.000117986 | 0.374142157 |
| cg21117668 | BOK;BOK                       | 4.34E-05    | 0.374120494 |
| cg24653263 | EGFLAM                        | 5.59E-05    | 0.374115073 |
| cg26631984 |                               | 5.59E-05    | 0.374103532 |
| cg10947146 | XKR6                          | 0.000233422 | 0.374099499 |
| cg02401556 |                               | 8.60E-06    | 0.374094116 |
| cg09949775 | COMP;COMP                     | 5.59E-05    | 0.374034079 |
| cg25397054 | GNA12                         | 5.59E-05    | 0.37403019  |
| cg05638174 |                               | 1.50E-05    | 0.374025378 |
| cg18307783 |                               | 4.34E-05    | 0.374023135 |
| cg15229124 | RBP1;RBP1;RBP1                | 0.00043997  | 0.374022272 |
| cg05847960 |                               | 0.000233422 | 0.374012931 |
| cg06293787 | MTNR1A                        | 1.50E-05    | 0.374012659 |
| cg08767286 | GBX2                          | 8.60E-06    | 0.373983861 |
| cg13886354 |                               | 0.000187194 | 0.373972709 |
| cg24943627 |                               | 3.34E-05    | 0.373972193 |
| cg02590345 | LPPR1                         | 1.50E-05    | 0.373962057 |
| cg19192585 |                               | 0.000357885 | 0.373961142 |
| cg16490692 | GGT7                          | 1.50E-05    | 0.373930883 |
| cg03694713 | NKX2-6                        | 0.000357885 | 0.373924201 |
| cg19927885 | LPIN3                         | 0.001376172 | 0.373924014 |
| cg03932308 | ETV1;ETV1;ETV1;ETV1           | 7.23E-05    | 0.373900334 |
| cg03115558 | NODAL                         | 8.60E-06    | 0.373873613 |
| cg25486957 |                               | 9.24E-05    | 0.373870659 |
| cg05764628 | SPTBN4                        | 8.60E-06    | 0.373864546 |
| cg12833207 | STEAP4;STEAP4                 | 0.000187194 | 0.373863923 |
| cg12847554 | SIM1                          | 7.23E-05    | 0.373855225 |
| cg07720188 | TNFRSF19                      | 0.003189589 | 0.373845501 |
| cg15070848 | WNT5A                         | 0.000357885 | 0.373827135 |
| cg11313468 | HNRNPUL1;HNRNPUL1             | 9.24E-05    | 0.373819684 |
| cg23756251 | PEX5L                         | 8.60E-06    | 0.373815519 |
| cg15198235 |                               | 0.000955793 | 0.373813164 |
| cg00795024 |                               | 3.34E-05    | 0.373803757 |
| cg06100807 | RHCG                          | 4.34E-05    | 0.373802902 |
| cg02099543 | FBLN1;FBLN1;FBLN1;FBLN1       | 0.002304201 | 0.37379337  |
| cg02039267 | VAX1;VAX1                     | 1.96E-05    | 0.373788549 |
| cg14088357 | HIF3A;HIF3A                   | 0.000357885 | 0.373785951 |
| cg15577178 | CACNA2D3                      | 0.000357885 | 0.373758924 |
| cg00270789 | GPT2;GPT2                     | 8.60E-06    | 0.373741245 |
| cg09772661 | CLEC4G                        | 0.000233422 | 0.373725509 |
| cg11667451 | TOX2                          | 0.001147425 | 0.373679314 |
| cg06068369 | PREP                          | 1.96E-05    | 0.373667235 |
| cg25555059 | SLC27A6;SLC27A6;SLC27A6       | 2.58E-05    | 0.373664955 |
| cg13726218 | DACH1;DACH1;DACH1             | 5.59E-05    | 0.373660482 |
| cg01245966 | ADCY8                         | 1.50E-05    | 0.373656933 |
| cg23578346 |                               | 8.60E-06    | 0.373651016 |
| cg03535659 | CYP7B1                        | 0.000290372 | 0.373650705 |
| cg21197871 | C8orf38                       | 0.000117986 | 0.373648256 |
| cg12671082 | PID1;PID1                     | 5.59E-05    | 0.373647955 |
| cg11149930 |                               | 0.000187194 | 0.373643605 |
| cg04367351 | PLA2R1;PLA2R1                 | 5.59E-05    | 0.373633253 |
| cg00547445 | GPR120                        | 5.59E-05    | 0.373629394 |
| cg14159336 | HIST3H2A;HIST3H2BB            | 8.60E-06    | 0.373623272 |
| cg20100910 |                               | 5.59E-05    | 0.373607032 |

|            |                               |             |             |
|------------|-------------------------------|-------------|-------------|
| cg23638252 |                               | 7.23E-05    | 0.373541086 |
| cg04038179 |                               | 4.34E-05    | 0.373540495 |
| cg14872657 | HECW1                         | 0.000537905 | 0.373533215 |
| cg16650717 | NBL1;NBL1                     | 4.34E-05    | 0.373526214 |
| cg16519587 |                               | 0.000290372 | 0.373513447 |
| cg12298745 |                               | 0.000117986 | 0.373501608 |
| cg13458645 | PITX2;PITX2;PITX2             | 0.000117986 | 0.373492156 |
| cg18629427 | GRID2                         | 1.50E-05    | 0.373474478 |
| cg01187920 | CARTPT                        | 1.11E-05    | 0.373474033 |
| cg01503065 | DCHS2;DCHS2                   | 2.58E-05    | 0.373470847 |
| cg11586570 |                               | 9.24E-05    | 0.373464793 |
| cg00551647 | CYYR1                         | 0.000117986 | 0.373456451 |
| cg09106624 | HOXC13                        | 1.11E-05    | 0.373449305 |
| cg23037386 | HCN1                          | 1.11E-05    | 0.373448196 |
| cg24081764 | PRKCG                         | 0.000148457 | 0.373446664 |
| cg24542441 | SEPT10;ANKRD57;SEPT10         | 5.59E-05    | 0.373445881 |
| cg26081162 | C6orf141;C6orf141             | 0.000148457 | 0.373445055 |
| cg11333886 | DSCAML1                       | 0.000148457 | 0.373423247 |
| cg15899948 | SLC27A6;SLC27A6               | 4.34E-05    | 0.373400167 |
| cg14266770 | VAV2;VAV2                     | 7.23E-05    | 0.373396455 |
| cg11355135 | SLC5A7                        | 2.58E-05    | 0.373394814 |
| cg02124514 | LOC389332                     | 5.59E-05    | 0.373330271 |
| cg15703773 |                               | 4.34E-05    | 0.373308966 |
| cg22794304 |                               | 4.34E-05    | 0.373297999 |
| cg17547875 |                               | 0.000290372 | 0.373279166 |
| cg27085741 | CLCN1                         | 0.000955793 | 0.373278308 |
| cg01088572 | GPR126;GPR126;GPR126;GPR126   | 5.59E-05    | 0.373273926 |
| cg08832220 | WNT5A                         | 5.11E-05    | 0.373240908 |
| cg23782616 | HMSD                          | 0.004357816 | 0.373239493 |
| cg08985029 | TBX5;TBX5;TBX5                | 0.00043997  | 0.373238602 |
| cg21602257 | PLTP;PLTP                     | 3.34E-05    | 0.373228735 |
| cg13785123 | ENO1                          | 7.23E-05    | 0.373228146 |
| cg15634398 | LYPD5                         | 9.24E-05    | 0.373225365 |
| cg22892860 | NRXN3;NRXN3;NRXN3;NRXN3;NRXN3 | 1.50E-05    | 0.373207667 |
| cg14054928 | CA10;CA10;CA10;CA10           | 1.50E-05    | 0.373198041 |
| cg05397631 |                               | 1.50E-05    | 0.373187144 |
| cg26618041 | CILP2                         | 1.50E-05    | 0.373183773 |
| cg16350446 | DCAF17;DCAF17;DCAF17          | 0.000654035 | 0.373182849 |
| cg13540171 |                               | 0.000233422 | 0.373177491 |
| cg26056277 |                               | 1.50E-05    | 0.373104584 |
| cg11554266 | ANKS1B;ANKS1B;ANKS1B          | 3.34E-05    | 0.373094581 |
| cg15170605 | ADD2;ADD2;ADD2;ADD2;ADD2      | 0.0050758   | 0.373080141 |
| cg14270687 | TMEM132E                      | 3.34E-05    | 0.373078654 |
| cg15685268 | IGSF9B                        | 2.58E-05    | 0.373069913 |
| cg20952286 | CCDC37                        | 2.58E-05    | 0.373061252 |
| cg26962618 |                               | 0.000654035 | 0.373049967 |
| cg22829671 | CXCL3                         | 0.000791389 | 0.373039553 |
| cg26875805 | ILDR2                         | 8.60E-06    | 0.373025975 |
| cg00580978 | LOC283392;LOC283392;TRHDE     | 0.000290372 | 0.373023967 |
| cg03534453 | PCDHB17                       | 9.24E-05    | 0.373023625 |
| cg12764034 | LHX8                          | 0.000357885 | 0.373003448 |
| cg01544270 | EXD3                          | 5.59E-05    | 0.372989929 |
| cg13547574 | STEAP2;STEAP2                 | 7.23E-05    | 0.372981545 |
| cg22010052 | LVRN                          | 8.60E-06    | 0.372970723 |
| cg12682382 | UBE2W;UBE2W                   | 0.000187194 | 0.372963857 |
| cg17361803 | C10orf41;C10orf41             | 1.50E-05    | 0.372941872 |
| cg09439204 |                               | 0.000654035 | 0.372911745 |
| cg00423826 |                               | 1.11E-05    | 0.372910979 |
| cg08121755 |                               | 4.34E-05    | 0.372910329 |
| cg03613077 | RGS7                          | 2.58E-05    | 0.372903253 |

|            |                                 |             |             |
|------------|---------------------------------|-------------|-------------|
| cg26002008 | LPCAT1                          | 0.000117986 | 0.372883656 |
| cg24791428 |                                 | 8.60E-06    | 0.372871811 |
| cg10273340 | GNAO1;GNAO1;LOC283856           | 0.000117986 | 0.372855042 |
| cg05667818 | ST7;ST7;ST7OT2                  | 0.000537905 | 0.372834835 |
| cg08378830 |                                 | 0.001639597 | 0.372829044 |
| cg22724500 | RFX4                            | 0.000187194 | 0.372827761 |
| cg16061498 |                                 | 1.96E-05    | 0.372817529 |
| cg13927566 |                                 | 9.24E-05    | 0.372796688 |
| cg00937262 | TMEM229A                        | 0.000117986 | 0.372780728 |
| cg20040743 | NECAB1                          | 8.60E-06    | 0.37277484  |
| cg26554567 | CACNA1A;CACNA1A                 | 0.000290372 | 0.372771688 |
| cg14650610 | SPOCK1                          | 0.000654035 | 0.372771207 |
| cg13806939 |                                 | 0.001639597 | 0.37276531  |
| cg20563468 |                                 | 1.96E-05    | 0.372762737 |
| cg18325315 | GTF2IRD1;GTF2IRD1               | 0.000357885 | 0.372759664 |
| cg27274706 | TMEM45B;TMEM45B                 | 4.34E-05    | 0.372753232 |
| cg07207220 | LRAT                            | 2.08E-05    | 0.372751279 |
| cg22660207 | SCRG1                           | 1.96E-05    | 0.372742832 |
| cg08865099 | EVX1                            | 0.000537905 | 0.372703023 |
| cg24673742 | GRIK3                           | 0.000955793 | 0.372700954 |
| cg01754525 |                                 | 1.96E-05    | 0.37268636  |
| cg10583000 | CNGA3;CNGA3                     | 9.24E-05    | 0.372671029 |
| cg09694051 | MED21                           | 5.59E-05    | 0.372667856 |
| cg02511231 | TLX3                            | 0.001376172 | 0.372653291 |
| cg05168033 | EFEMP1;EFEMP1;EFEMP1            | 8.60E-06    | 0.372641906 |
| cg24168914 | SLC7A2                          | 0.00043997  | 0.372599925 |
| cg23615741 |                                 | 1.11E-05    | 0.372588608 |
| cg23241637 | ZNF804A                         | 1.50E-05    | 0.372580906 |
| cg23962250 | C10orf93                        | 9.24E-05    | 0.372567136 |
| cg03058660 | GRIN2D                          | 0.000791389 | 0.372564537 |
| cg09442828 | ADRB3                           | 1.11E-05    | 0.372552376 |
| cg19315202 | TMPRSS2;TMPRSS2                 | 0.000955793 | 0.372537722 |
| cg24359323 | FGF3                            | 0.000357885 | 0.372527059 |
| cg16754467 |                                 | 0.000148457 | 0.372511833 |
| cg19039028 | COL25A1;COL25A1;COL25A1;COL25A1 | 8.60E-06    | 0.372506595 |
| cg22315453 | TFAP2A;TFAP2A;TFAP2A            | 5.59E-05    | 0.372502555 |
| cg08729031 |                                 | 0.001948248 | 0.372498707 |
| cg16033053 | MKX                             | 0.000117986 | 0.372472092 |
| cg21694941 | PENK;PENK;PENK                  | 1.11E-05    | 0.372463418 |
| cg27625055 | PTPRT;PTPRT                     | 5.59E-05    | 0.372437039 |
| cg17439757 | ADAMTS19                        | 1.50E-05    | 0.372423569 |
| cg15457217 | WDFY1                           | 3.34E-05    | 0.372419951 |
| cg02601140 |                                 | 1.50E-05    | 0.372408337 |
| cg17713539 |                                 | 0.000117986 | 0.37239563  |
| cg26357833 | C4orf31                         | 0.000148457 | 0.372382844 |
| cg27117792 |                                 | 0.00043997  | 0.372379426 |
| cg06382344 | TBR1                            | 0.00041966  | 0.372366845 |
| cg05238917 |                                 | 3.34E-05    | 0.372363457 |
| cg00312553 | C5orf52                         | 3.34E-05    | 0.372362407 |
| cg22891500 |                                 | 4.34E-05    | 0.372358084 |
| cg18517369 |                                 | 5.59E-05    | 0.372357836 |
| cg09135551 | TMEM26;TMEM26                   | 2.58E-05    | 0.372355639 |
| cg18015746 | LPL                             | 0.000187194 | 0.372345844 |
| cg17305266 | FOXF2                           | 0.000117986 | 0.372320694 |
| cg11226708 | MORN4;MORN4                     | 2.58E-05    | 0.372293511 |
| cg08175413 | LNPEP;LNPEP;LNPEP               | 0.000955793 | 0.372293437 |
| cg05555207 | TBX5;TBX5                       | 5.59E-05    | 0.372291625 |
| cg21176643 | RFX4                            | 0.000537905 | 0.372276522 |
| cg18290624 | SLC6A11                         | 7.23E-05    | 0.372257129 |
| cg03356900 | QRFPR                           | 8.60E-06    | 0.372245927 |

|            |                                         |             |             |
|------------|-----------------------------------------|-------------|-------------|
| cg01150683 |                                         | 3.34E-05    | 0.372192564 |
| cg21215550 |                                         | 9.24E-05    | 0.372189365 |
| cg04460364 | NDEL1;NDEL1                             | 3.34E-05    | 0.372189302 |
| cg15317068 |                                         | 1.96E-05    | 0.372182421 |
| cg27112666 |                                         | 1.11E-05    | 0.372153705 |
| cg15212349 | SLC6A3                                  | 8.60E-06    | 0.372146963 |
| cg20068209 | TMEM30A;TMEM30A                         | 0.000537905 | 0.372141014 |
| cg04932551 | FOXA1                                   | 0.000117986 | 0.372131627 |
| cg15595502 |                                         | 3.34E-05    | 0.372120006 |
| cg14615559 | LCN2                                    | 0.000233422 | 0.37211238  |
| cg22570122 | CBLN1                                   | 0.000290372 | 0.372095232 |
| cg02677635 | FAM125B;FAM125B                         | 5.59E-05    | 0.372092516 |
| cg27539746 | KIAA1598;KIAA1598                       | 8.60E-06    | 0.372092418 |
| cg11990309 | HTR1E                                   | 0.000233422 | 0.372069173 |
| cg21082028 |                                         | 0.000537905 | 0.372065909 |
| cg23813514 | GRID1                                   | 0.000187194 | 0.372045134 |
| cg26833652 | MYBPC1;MYBPC1;MYBPC1;MYBPC1             | 3.34E-05    | 0.372019457 |
| cg15710245 | BDNF;BDNF;BDNF;BDNF;BDNF;BDNF;BDNF;BDNF | 8.60E-06    | 0.372019192 |
| cg20613972 | PLAC8;PLAC8                             | 3.34E-05    | 0.372010663 |
| cg00221718 |                                         | 0.000537905 | 0.3719863   |
| cg20514322 | NCKAP5;NCKAP5                           | 8.60E-06    | 0.371972459 |
| cg11229862 | CCDC37                                  | 4.34E-05    | 0.37197162  |
| cg13713172 |                                         | 0.002714607 | 0.371955566 |
| cg01187505 | ANO3                                    | 3.34E-05    | 0.371944423 |
| cg06290070 | EYA1                                    | 0.000654035 | 0.371909535 |
| cg21428681 | NKX3-1                                  | 4.34E-05    | 0.371907439 |
| cg24415066 |                                         | 9.24E-05    | 0.371853286 |
| cg01568319 | SMOC2;SMOC2;SMOC2;SMOC2                 | 0.000233422 | 0.371843416 |
| cg24664038 |                                         | 1.50E-05    | 0.371830197 |
| cg15772216 | SYNPR                                   | 1.96E-05    | 0.371794233 |
| cg12374721 | C17orf93;PRAC                           | 0.000187194 | 0.371782742 |
| cg17862113 | MYOD1                                   | 1.11E-05    | 0.371781379 |
| cg27606567 |                                         | 0.000955793 | 0.371769773 |
| cg05608777 | DOCK1                                   | 0.000290372 | 0.371751637 |
| cg26348902 |                                         | 8.60E-06    | 0.371751484 |
| cg25723459 | ST3GAL4                                 | 0.000537905 | 0.371714078 |
| cg27380915 |                                         | 0.000290372 | 0.371705529 |
| cg09763162 |                                         | 1.11E-05    | 0.371683568 |
| cg01672943 | PAX9                                    | 0.000705485 | 0.371671579 |
| cg09174233 | SH3GL2                                  | 8.60E-06    | 0.371669599 |
| cg10994430 | PALM2;PALM2-AKAP2;PALM2;PALM2-AKAP2     | 8.60E-06    | 0.371662589 |
| cg06900404 |                                         | 1.96E-05    | 0.37165121  |
| cg07640648 | DLL3;DLL3                               | 4.34E-05    | 0.371627879 |
| cg16763443 |                                         | 1.50E-05    | 0.371626754 |
| cg04024095 | VSTM2A;VSTM2A                           | 8.60E-06    | 0.371625354 |
| cg23205387 |                                         | 1.50E-05    | 0.371600958 |
| cg08959396 | C16orf73;C16orf73                       | 3.34E-05    | 0.371572154 |
| cg16055869 | CXCL5                                   | 1.96E-05    | 0.371565896 |
| cg23241456 | CACNA1E                                 | 7.23E-05    | 0.371565236 |
| cg22330512 | WSCD2                                   | 5.59E-05    | 0.371546165 |
| cg01392772 | HLF;HLF                                 | 0.000357885 | 0.371543248 |
| cg00473179 |                                         | 0.000148457 | 0.371539518 |
| cg27100436 | DPY19L2P2;DPY19L2P2                     | 8.60E-06    | 0.371527093 |
| cg07961512 |                                         | 3.34E-05    | 0.371518088 |
| cg00748875 | PCDHA1;PCDHA1;PCDHA2;PCDHA2             | 0.000537905 | 0.371516975 |
| cg27045999 | C15orf26                                | 2.58E-05    | 0.371486178 |
| cg07190535 | PDE4D;PDE4D                             | 0.000148457 | 0.371473445 |
| cg06815950 | CUX2                                    | 0.001376172 | 0.371471173 |
| cg22491680 | HAL                                     | 2.58E-05    | 0.371458376 |
| cg18722790 | BMPR1B                                  | 0.00043997  | 0.371457921 |



|            |                                     |             |             |
|------------|-------------------------------------|-------------|-------------|
| cg13460643 | G0S2;G0S2                           | 0.001887355 | 0.371430933 |
| cg17222829 | SHANK2;SHANK2                       | 0.000117986 | 0.371414204 |
| cg13303459 | SH3BP4                              | 7.23E-05    | 0.371411028 |
| cg02263813 | MT1A;MT1A                           | 4.34E-05    | 0.371398586 |
| cg15167959 |                                     | 1.96E-05    | 0.371389236 |
| cg20881910 | NTM;NTM;NTM;NTM                     | 4.34E-05    | 0.371359031 |
| cg01818121 | GRAMD2                              | 0.000334462 | 0.371340287 |
| cg17852482 | TBCD                                | 4.34E-05    | 0.371339259 |
| cg04193970 |                                     | 2.58E-05    | 0.371338418 |
| cg18845189 |                                     | 0.000223017 | 0.371332623 |
| cg01229567 | MIB2;MIB2;MIB2;MIB2;MIB2;MIB2       | 0.000654035 | 0.3713248   |
| cg12810701 | GPR172B;GPR172B                     | 0.000290372 | 0.371310837 |
| cg15929797 | NKX2-5;NKX2-5;NKX2-5                | 0.000791389 | 0.371299658 |
| cg25096566 | MAP7                                | 0.004357816 | 0.371281549 |
| cg14181409 | RCVRN                               | 7.23E-05    | 0.371277217 |
| cg11155924 | SHANK2;SHANK2                       | 0.001376172 | 0.371269787 |
| cg20082357 | ATP6V0A1;ATP6V0A1;ATP6V0A1          | 1.96E-05    | 0.371267096 |
| cg11241436 | NMNAT2                              | 0.000233422 | 0.371266234 |
| cg02637078 | SYT5                                | 1.96E-05    | 0.371253004 |
| cg14056110 | CA10;CA10;CA10                      | 4.34E-05    | 0.371246508 |
| cg21717959 | PACRG;PACRG;PARK2;PARK2;PACRG;PARK2 | 0.000233422 | 0.371241345 |
| cg15984718 | UNC5C                               | 2.58E-05    | 0.371226359 |
| cg26666835 |                                     | 0.000510765 | 0.371221554 |
| cg09180848 | BNC1                                | 2.58E-05    | 0.371179486 |
| cg16364121 |                                     | 0.000233422 | 0.371172758 |
| cg12337525 |                                     | 3.34E-05    | 0.371144206 |
| cg02510267 | NELL1;NELL1                         | 0.001639597 | 0.371110737 |
| cg26838949 | KIF21B                              | 0.001147425 | 0.371103172 |
| cg24079702 | FHL2;FHL2;FHL2;FHL2                 | 8.60E-06    | 0.371089638 |
| cg14324502 | ISCA1                               | 0.001147425 | 0.371087199 |
| cg03313542 | TMEM209                             | 0.002714607 | 0.37108407  |
| cg18729704 | PDCD11                              | 0.000148457 | 0.371071815 |
| cg03238797 | ADAMTS18;ADAMTS18                   | 7.23E-05    | 0.371059335 |
| cg16832648 | CCNY;CCNY                           | 5.59E-05    | 0.37105417  |
| cg22608170 | MAPK4                               | 0.000357885 | 0.371034947 |
| cg05412990 | WDR35;WDR35                         | 1.96E-05    | 0.371027083 |
| cg15612947 | TRIO                                | 0.001639597 | 0.371024807 |
| cg03036592 |                                     | 0.000357885 | 0.371023553 |
| cg26578682 | IRX2;IRX2                           | 5.59E-05    | 0.37101261  |
| cg09486567 | OVOL2;OVOL2                         | 4.34E-05    | 0.371007326 |
| cg15589153 |                                     | 8.60E-06    | 0.370994177 |
| cg26337277 | TMPRSS2;TMPRSS2                     | 0.001147425 | 0.370992318 |
| cg15007156 | KIAA1026;KIAA1026                   | 1.11E-05    | 0.370985907 |
| cg22081832 | ADAMTS9                             | 1.11E-05    | 0.370981726 |
| cg24586758 | PCDHB3                              | 1.96E-05    | 0.370977593 |
| cg26307218 |                                     | 8.60E-06    | 0.370958544 |
| cg09578028 | HOXD9                               | 1.96E-05    | 0.370952088 |
| cg06905692 | ALK;ALK                             | 0.000290372 | 0.370936594 |
| cg09817427 | TBX18                               | 8.60E-06    | 0.370928324 |
| cg16734795 | GPR77                               | 1.50E-05    | 0.370891315 |
| cg03506979 | FAM171B;FAM171B                     | 9.24E-05    | 0.370883329 |
| cg27341926 | GFRA1;GFRA1;GFRA1;GFRA1             | 0.001376172 | 0.370880189 |
| cg06639320 | FHL2;FHL2;FHL2;FHL2                 | 4.34E-05    | 0.370874239 |
| cg05654364 | CSNK1A1;CSNK1A1                     | 0.006823935 | 0.370867093 |
| cg07566169 | HOXD11                              | 0.000357885 | 0.370848895 |
| cg12297590 | ZDHHC14;ZDHHC14                     | 0.004357816 | 0.370808506 |
| cg08206959 | GABRA2;GABRA2                       | 4.34E-05    | 0.370806194 |
| cg21510348 |                                     | 1.96E-05    | 0.370801275 |
| cg23661721 |                                     | 0.000233422 | 0.370798577 |
| cg14311320 | GPR37                               | 1.96E-05    | 0.370767667 |

|            |                                         |             |             |
|------------|-----------------------------------------|-------------|-------------|
| cg14879760 |                                         | 4.34E-05    | 0.370764239 |
| cg03983647 | CDH6                                    | 5.59E-05    | 0.370760996 |
| cg00399175 | FAM59B                                  | 7.23E-05    | 0.370760189 |
| cg07076175 | FAM150A                                 | 1.96E-05    | 0.370746289 |
| cg23779890 | GDAP1;GDAP1                             | 1.50E-05    | 0.370713624 |
| cg24427660 | PNPLA2                                  | 5.59E-05    | 0.370711574 |
| cg10979547 | VSNL1                                   | 1.50E-05    | 0.370708275 |
| cg02213139 | WDR63                                   | 1.11E-05    | 0.370700482 |
| cg00950265 |                                         | 1.11E-05    | 0.370696216 |
| cg17544952 | MEOX2                                   | 1.50E-05    | 0.370691484 |
| cg23616527 |                                         | 8.60E-06    | 0.370687938 |
| cg03774803 | BOLL;BOLL;BOLL                          | 2.58E-05    | 0.370678674 |
| cg21283680 | SH3BP5                                  | 4.34E-05    | 0.370668436 |
| cg18912484 |                                         | 0.000187194 | 0.3706664   |
| cg24869535 | NPNT                                    | 9.24E-05    | 0.370650235 |
| cg03778029 | CCDC68;CCDC68                           | 7.23E-05    | 0.370626596 |
| cg24503056 |                                         | 0.000117986 | 0.370592396 |
| cg14339043 | ANKRD24                                 | 5.59E-05    | 0.370587921 |
| cg06390643 | ETV5                                    | 0.000117986 | 0.370587895 |
| cg00926502 | BIVM;BIVM;KDELC1;BIVM;BIVM              | 4.34E-05    | 0.370586615 |
| cg26267340 | NRG1                                    | 1.50E-05    | 0.370581083 |
| cg22044566 | FAM84A                                  | 2.58E-05    | 0.370580454 |
| cg22375763 | LRG1                                    | 7.23E-05    | 0.370572926 |
| cg13592931 | PCDHA6;PCDHA2;PCDHA1;PCDHA9;PCDHA7      | 8.60E-06    | 0.370544056 |
| cg19204131 |                                         | 3.34E-05    | 0.370537771 |
| cg23956648 | IGF2BP2;IGF2BP2                         | 2.58E-05    | 0.370537462 |
| cg06856840 | FAH                                     | 0.000791389 | 0.370528033 |
| cg10813544 |                                         | 5.78E-05    | 0.370480768 |
| cg19786627 | FOXG1                                   | 8.60E-06    | 0.37047492  |
| cg10162522 | KCNH5;KCNH5;KCNH5                       | 7.23E-05    | 0.370436222 |
| cg11104088 | TAF3                                    | 0.001948248 | 0.370414869 |
| cg08334278 |                                         | 8.60E-06    | 0.370408767 |
| cg22458194 | DRD2;DRD2                               | 1.11E-05    | 0.370393533 |
| cg22234080 | NEFH                                    | 1.11E-05    | 0.370386105 |
| cg13918640 |                                         | 5.59E-05    | 0.370382435 |
| cg19674851 |                                         | 0.002714607 | 0.370379489 |
| cg05141147 | LHX5                                    | 5.59E-05    | 0.370375852 |
| cg07854547 | SNTG1                                   | 1.96E-05    | 0.370368766 |
| cg25766271 |                                         | 8.60E-06    | 0.370366414 |
| cg01644741 | MIR1259;SNORD12B;C20orf199;C20orf199;SN | 0.000148457 | 0.370359089 |
| cg20010506 | FAM19A2;FAM19A2                         | 0.000290372 | 0.370358759 |
| cg00752099 | ATOH1                                   | 5.59E-05    | 0.370355378 |
| cg21781157 | ZNFX1                                   | 4.34E-05    | 0.370343963 |
| cg18217235 |                                         | 1.11E-05    | 0.370337137 |
| cg18192919 | TMEM26;TMEM26                           | 8.60E-06    | 0.370335794 |
| cg03637878 | JAM3                                    | 0.000187194 | 0.370325418 |
| cg14081465 | ASTN2;ASTN2;ASTN2                       | 0.000654035 | 0.370298604 |
| cg09472203 | AP3B2;AP3B2                             | 4.34E-05    | 0.370294657 |
| cg05101674 | DOK5                                    | 5.59E-05    | 0.370259123 |
| cg09130963 | DHCR24                                  | 1.96E-05    | 0.370258283 |
| cg03236397 | HPSE2;HPSE2;HPSE2;HPSE2                 | 1.96E-05    | 0.370249307 |
| cg13089335 | POU2F1                                  | 4.34E-05    | 0.37024739  |
| cg24471254 | ACTL6B                                  | 8.60E-06    | 0.370245867 |
| cg26526374 |                                         | 0.00043997  | 0.370244848 |
| cg23777958 | RALYL;RALYL;RALYL;RALYL;RALYL;RALYL;R   | 9.24E-05    | 0.370244123 |
| cg12529672 | NOTO                                    | 4.34E-05    | 0.370243098 |
| cg07724670 |                                         | 2.58E-05    | 0.37021569  |
| cg00688447 |                                         | 0.000537905 | 0.370214052 |
| cg06737561 | CHAT;CHAT;CHAT;CHAT;CHAT;CHAT;CHAT      | 7.23E-05    | 0.370209481 |
| cg19608455 | MAPK4;MAPK4                             | 0.000654035 | 0.370185891 |

|            |                         |             |             |
|------------|-------------------------|-------------|-------------|
| cg18535415 | KIF21B                  | 2.58E-05    | 0.37018257  |
| cg12550055 | C22orf45;C22orf45;UPB1  | 8.60E-06    | 0.37016575  |
| cg01824410 |                         | 0.001376172 | 0.370164802 |
| cg20406460 |                         | 0.000537905 | 0.370158119 |
| cg02073887 |                         | 0.000537905 | 0.370152026 |
| cg10957242 | STOX2                   | 0.000158823 | 0.370150927 |
| cg26344233 | FHL2;FHL2;FHL2;FHL2     | 1.96E-05    | 0.370149224 |
| cg06823060 | CMIP;CMIP               | 2.58E-05    | 0.370104416 |
| cg02172150 | WBSCR17                 | 0.000117986 | 0.370084794 |
| cg02683197 |                         | 0.000148457 | 0.370081809 |
| cg26847100 | SLC44A2;SLC44A2         | 0.000290372 | 0.370081288 |
| cg00756058 | DZIP1;DZIP1;DZIP1;DZIP1 | 0.000187194 | 0.370075331 |
| cg20653075 | MIR124-2                | 1.50E-05    | 0.370075218 |
| cg00973653 |                         | 7.23E-05    | 0.370070906 |
| cg01572652 | C12orf42;C12orf42       | 8.60E-06    | 0.370058146 |
| cg18067134 | FOXP1                   | 0.000187194 | 0.370052793 |
| cg06893389 |                         | 0.000117986 | 0.370017164 |
| cg10542584 | FEZF2                   | 0.000117986 | 0.370013049 |
| cg21532659 | NAV2;NAV2;NAV2          | 0.001639597 | 0.370010103 |
| cg24041917 |                         | 1.11E-05    | 0.370008288 |
| cg27111463 | FOXI3                   | 9.24E-05    | 0.370006678 |
| cg17208953 |                         | 3.34E-05    | 0.370004291 |
| cg27114120 | PROKR2                  | 0.000117986 | 0.369991549 |
| cg18698788 |                         | 0.003189589 | 0.369991158 |
| cg13187764 |                         | 0.000233422 | 0.369990717 |
| cg12420104 | DMRT3                   | 1.11E-05    | 0.369981053 |
| cg18162583 |                         | 5.59E-05    | 0.369964865 |
| cg14281591 | KLF5                    | 0.000290372 | 0.369935883 |
| cg10330371 | CADPS2;CADPS2;CADPS2    | 9.24E-05    | 0.369928698 |
| cg19464804 |                         | 1.96E-05    | 0.369926436 |
| cg17038667 | FGF3                    | 0.000946184 | 0.369898443 |
| cg07913294 | AGBL4;AGBL4             | 8.60E-06    | 0.369894802 |
| cg10491628 |                         | 0.000290372 | 0.369894231 |
| cg10967023 |                         | 2.58E-05    | 0.369882151 |
| cg14523804 |                         | 1.50E-05    | 0.369874269 |
| cg18621091 |                         | 0.000233422 | 0.369856991 |
| cg14584031 |                         | 0.000117986 | 0.369856453 |
| cg00980622 |                         | 0.000148457 | 0.369834295 |
| cg13057663 |                         | 0.000290372 | 0.369822355 |
| cg14249174 | ARFIP1;ARFIP1;ARFIP1    | 0.000705485 | 0.369816754 |
| cg15991405 | HOXD9                   | 0.000537905 | 0.369803579 |
| cg22962883 | NNMT                    | 0.000187194 | 0.369797114 |
| cg01914621 |                         | 4.34E-05    | 0.369783035 |
| cg11231701 | CDK5RAP1;CDK5RAP1       | 0.000357885 | 0.369783004 |
| cg27196745 | PTPRO;PTPRO             | 1.96E-05    | 0.36977617  |
| cg16532600 | HAND1                   | 3.34E-05    | 0.369772564 |
| cg22082709 | AGTR1;AGTR1;AGTR1;AGTR1 | 5.59E-05    | 0.369770678 |
| cg04105416 | RADIL                   | 0.000148457 | 0.369755029 |
| cg22353097 | SLC22A15                | 0.000357885 | 0.369748348 |
| cg11831981 | SCG3;SCG3;SCG3;SCG3     | 0.000205664 | 0.369740018 |
| cg02655630 | SLC12A5;SLC12A5         | 1.50E-05    | 0.369722034 |
| cg12817908 | NMNAT3                  | 0.001948248 | 0.369714138 |
| cg03464847 | DNAH9                   | 8.60E-06    | 0.369708675 |
| cg21058391 |                         | 1.50E-05    | 0.369705634 |
| cg09645336 | C5orf43                 | 4.34E-05    | 0.369628869 |
| cg07850592 | TRIM67                  | 1.50E-05    | 0.369622116 |
| cg07341378 | TBC1D12;TBC1D12         | 2.58E-05    | 0.369618046 |
| cg01556552 |                         | 2.58E-05    | 0.369602173 |
| cg23989004 | ZNF709                  | 0.000148457 | 0.36959818  |
| cg10281977 | TMEM179                 | 2.08E-05    | 0.369577985 |

|            |                                    |             |             |
|------------|------------------------------------|-------------|-------------|
| cg11142406 | SOX2OT;SOX2                        | 7.23E-05    | 0.369577217 |
| cg10425827 | FAM184A;FAM184A                    | 5.59E-05    | 0.369562931 |
| cg19032066 | PAX9                               | 2.58E-05    | 0.369561514 |
| cg23044884 | RBPMS;RBPMS;RBPMS;RBPMS            | 0.0050758   | 0.369556348 |
| cg01655831 | GREB1L                             | 3.34E-05    | 0.369542235 |
| cg13730105 | TLR4;TLR4;TLR4                     | 0.001147425 | 0.369530314 |
| cg06187947 | GULP1                              | 8.60E-06    | 0.36952182  |
| cg18710784 | OPCML;OPCML                        | 5.59E-05    | 0.369517292 |
| cg17696377 | ERN2                               | 8.60E-06    | 0.36951507  |
| cg01816304 | PARVA                              | 8.60E-06    | 0.369511203 |
| cg26012941 | WDR63                              | 1.50E-05    | 0.369479623 |
| cg26440289 | SNX31                              | 0.000357885 | 0.369475647 |
| cg26001333 | MAP1B                              | 0.000117986 | 0.369474777 |
| cg17012160 | FMN2                               | 5.59E-05    | 0.369472546 |
| cg02547394 | SOX1                               | 0.000148457 | 0.369459519 |
| cg01226811 | KCNJ8;KCNJ8                        | 8.60E-06    | 0.369459353 |
| cg16865446 | PAX6;PAX6;PAX6                     | 9.24E-05    | 0.369445928 |
| cg03573446 | BMP7                               | 0.000365373 | 0.369433989 |
| cg14811102 | ONECUT1                            | 8.60E-06    | 0.369432036 |
| cg07729059 |                                    | 0.000357885 | 0.369426356 |
| cg06706156 |                                    | 0.000187194 | 0.369397644 |
| cg06693487 |                                    | 4.34E-05    | 0.369381719 |
| cg07108443 |                                    | 1.50E-05    | 0.369360431 |
| cg23688510 | T;T                                | 1.96E-05    | 0.36935309  |
| cg10899099 |                                    | 8.60E-06    | 0.369350676 |
| cg12688240 | NANOG                              | 3.34E-05    | 0.369346196 |
| cg23676151 | NR2E1                              | 7.23E-05    | 0.369342139 |
| cg25556432 |                                    | 9.24E-05    | 0.369341328 |
| cg26559209 |                                    | 0.000357885 | 0.369330425 |
| cg02866628 | VSTM2A                             | 0.000187194 | 0.369306797 |
| cg18541254 |                                    | 8.60E-06    | 0.369292315 |
| cg14090923 | ASTN2;ASTN2;ASTN2                  | 0.000654035 | 0.369275475 |
| cg14931230 | LYPD5                              | 0.000357885 | 0.369266747 |
| cg03151187 | BRUNOL4;BRUNOL4;BRUNOL4;BRUNOL4    | 4.34E-05    | 0.36926297  |
| cg15129608 | PRKCG                              | 0.00043997  | 0.36924493  |
| cg02885007 | HOXD9                              | 8.60E-06    | 0.369183    |
| cg01247628 | SEMA6D;SEMA6D;SEMA6D;SEMA6D;SEMA6D | 0.000791389 | 0.369181916 |
| cg02974928 | CACNA1E                            | 0.000537905 | 0.369164378 |
| cg04792330 |                                    | 0.000233422 | 0.369159169 |
| cg21041472 | HIVEP1                             | 3.34E-05    | 0.369155266 |
| cg01419577 |                                    | 0.000117986 | 0.369134452 |
| cg18075315 | RFX4                               | 0.001376172 | 0.369128935 |
| cg10981651 |                                    | 3.34E-05    | 0.369126271 |
| cg02150988 | HOXD1                              | 8.60E-06    | 0.369120836 |
| cg02957057 | NID1                               | 0.000334462 | 0.369119829 |
| cg18381051 | PRDM16;PRDM16                      | 9.24E-05    | 0.369100568 |
| cg01429449 |                                    | 2.58E-05    | 0.369090114 |
| cg22865720 | PRKCZ                              | 0.002714607 | 0.369087603 |
| cg08850461 |                                    | 0.000791389 | 0.369081027 |
| cg10756127 | TLL1                               | 0.000148457 | 0.3690752   |
| cg18276112 | FO XK1                             | 0.001948248 | 0.369070313 |
| cg02355420 | EPHA5;EPHA5                        | 5.59E-05    | 0.369066745 |
| cg03234732 | ZNF454                             | 0.000187194 | 0.369062044 |
| cg09251429 | ROBO3                              | 0.000233422 | 0.369061032 |
| cg18860954 | ZNF814                             | 1.96E-05    | 0.369047443 |
| cg05394500 | ADRA2C                             | 0.002927025 | 0.36904674  |
| cg19456953 | PCSK1                              | 0.000955793 | 0.369037777 |
| cg04684656 |                                    | 3.34E-05    | 0.369026455 |
| cg12903638 | UNC80;UNC80                        | 0.000357885 | 0.369014635 |
| cg17331494 |                                    | 1.50E-05    | 0.36901194  |

|            |                                        |             |             |
|------------|----------------------------------------|-------------|-------------|
| cg14919250 | XKR6                                   | 5.59E-05    | 0.368992625 |
| cg06230847 | TRIM39;TRIM39                          | 3.34E-05    | 0.368981755 |
| cg27297088 | FAM163A                                | 1.50E-05    | 0.368974192 |
| cg09749813 | TBX18                                  | 2.58E-05    | 0.368973888 |
| cg03474903 | KIAA1755                               | 7.23E-05    | 0.368953931 |
| cg02311193 |                                        | 8.60E-06    | 0.368952379 |
| cg11689407 |                                        | 0.000187194 | 0.368946099 |
| cg26736540 | TFAP2C                                 | 5.59E-05    | 0.368945813 |
| cg20218614 | FAM83A;FAM83A;FAM83A;FAM83A            | 0.000290372 | 0.368918505 |
| cg01440934 | MKNK1;MKNK1;MKNK1;MKNK1;MKNK1          | 0.000233422 | 0.368905235 |
| cg20547653 | SLC5A7                                 | 1.96E-05    | 0.368897164 |
| cg25130385 | C9orf98                                | 7.23E-05    | 0.368892544 |
| cg11368643 | PCDHB15                                | 8.60E-06    | 0.368882287 |
| cg06779110 | C14orf23;C14orf23                      | 4.34E-05    | 0.368876007 |
| cg03933572 | LYPD6                                  | 8.60E-06    | 0.368875217 |
| cg15235999 | ZNF578                                 | 9.24E-05    | 0.368795683 |
| cg15012484 |                                        | 1.96E-05    | 0.368774876 |
| cg24846199 |                                        | 1.11E-05    | 0.368772664 |
| cg23575688 |                                        | 0.0050758   | 0.368758914 |
| cg21224380 | SSH1;SSH1                              | 9.24E-05    | 0.368758079 |
| cg19324633 |                                        | 5.59E-05    | 0.368756713 |
| cg01843946 |                                        | 4.34E-05    | 0.368746173 |
| cg05155965 | NR2F2;NR2F2                            | 1.50E-05    | 0.368723947 |
| cg08017928 | MNX1;MNX1;MNX1                         | 1.50E-05    | 0.368686199 |
| cg10444382 | RFX4                                   | 8.60E-06    | 0.368672214 |
| cg22517656 |                                        | 0.000233422 | 0.368669547 |
| cg07814567 | DAPP1                                  | 3.34E-05    | 0.368581888 |
| cg23133011 |                                        | 0.000117986 | 0.368580378 |
| cg04525757 | FOXG1                                  | 0.000233422 | 0.368573492 |
| cg09041678 | PAX6                                   | 1.50E-05    | 0.368551559 |
| cg03611555 | SLC25A21;SLC25A21;SLC25A21;LOC10012979 | 1.11E-05    | 0.368533151 |
| cg00116554 | SNAI2;SNAI2                            | 2.58E-05    | 0.368504587 |
| cg14574996 | ZNF414;ZNF414                          | 0.001948248 | 0.368499621 |
| cg06672560 | CBLN4                                  | 1.96E-05    | 0.368498237 |
| cg21319323 |                                        | 0.001291055 | 0.368497333 |
| cg04115680 | SRRM3                                  | 0.000791389 | 0.368494336 |
| cg02229261 | HAS1                                   | 8.60E-06    | 0.368446547 |
| cg27430561 |                                        | 0.000187194 | 0.368436106 |
| cg10313337 | CDH1                                   | 9.24E-05    | 0.36835491  |
| cg23911433 |                                        | 0.000187194 | 0.368316965 |
| cg04670857 | CTNNA2;CTNNA2;CTNNA2;CTNNA2            | 0.000357885 | 0.36831586  |
| cg04425551 | TRIM39;TRIM39                          | 0.000117986 | 0.368310853 |
| cg02919422 | SOX17;SOX17                            | 2.58E-05    | 0.368297951 |
| cg01535698 | FMN2                                   | 0.00041966  | 0.368276174 |
| cg16650529 |                                        | 0.000537905 | 0.368274938 |
| cg26750893 |                                        | 4.34E-05    | 0.368262083 |
| cg27555382 | EIF5A2                                 | 0.000187194 | 0.368239691 |
| cg22763680 | SLFN12L                                | 2.58E-05    | 0.368226131 |
| cg13594903 | STOML2                                 | 1.96E-05    | 0.368149903 |
| cg17000199 | FUT9                                   | 0.000357885 | 0.368143479 |
| cg05930881 | GATA4                                  | 0.000357885 | 0.368141723 |
| cg00866976 | GNAO1;GNAO1;LOC283856                  | 0.000205664 | 0.36813292  |
| cg12934884 |                                        | 0.00043997  | 0.368130869 |
| cg25869196 | IL1RL1;IL1RL1                          | 0.000117986 | 0.368125396 |
| cg00436496 |                                        | 7.23E-05    | 0.36811294  |
| cg18459489 | VAX1                                   | 1.11E-05    | 0.368112568 |
| cg17255712 | SOX9                                   | 0.000117986 | 0.368103807 |
| cg19206040 | GRIK3                                  | 0.001376172 | 0.368102603 |
| cg26212180 | VAX1;VAX1                              | 1.96E-05    | 0.368090984 |
| cg07461772 | SMPD3                                  | 9.24E-05    | 0.368087678 |

|            |                                    |             |             |
|------------|------------------------------------|-------------|-------------|
| cg19748424 | LOC255167;LOC255167                | 1.96E-05    | 0.368036103 |
| cg09066326 | PCDHGA4;PCDHGA6;PCDHGA1;PCDHGA5;PC | 2.58E-05    | 0.368026225 |
| cg02519037 | TACC2;TACC2                        | 3.34E-05    | 0.367986205 |
| cg17704189 | FEZF1;FEZF1                        | 1.50E-05    | 0.367984794 |
| cg09759458 |                                    | 4.34E-05    | 0.367979624 |
| cg04365481 | MST1P9                             | 1.50E-05    | 0.367963416 |
| cg15333318 | NECAB1                             | 4.34E-05    | 0.367961925 |
| cg27343150 | ANO5;ANO5                          | 1.96E-05    | 0.367954072 |
| cg14324370 |                                    | 0.000791389 | 0.367903707 |
| cg23767994 | DLX6AS                             | 9.24E-05    | 0.367866302 |
| cg08967802 | C17orf102;TMEM132E                 | 0.000148457 | 0.3678582   |
| cg08418670 | SH3GL1                             | 2.58E-05    | 0.367843818 |
| cg02605370 | RTBDN                              | 0.000654035 | 0.367828395 |
| cg02983163 |                                    | 0.000187194 | 0.367796683 |
| cg09481483 |                                    | 0.001376172 | 0.367772808 |
| cg21852408 | C11orf87                           | 1.50E-05    | 0.367768527 |
| cg05388492 | ESRRG                              | 0.000233422 | 0.367763202 |
| cg14537533 | KRT7                               | 0.000955793 | 0.367738052 |
| cg25755575 | ESRRG                              | 8.60E-06    | 0.367731095 |
| cg24926276 | LRG1                               | 0.000117986 | 0.367730926 |
| cg10005978 | DMRT3                              | 2.58E-05    | 0.367714207 |
| cg00099976 | SHISA2                             | 1.96E-05    | 0.367708141 |
| cg16000637 | UNCX                               | 0.000791389 | 0.367690775 |
| cg00772000 | NHLRC1                             | 1.96E-05    | 0.367679264 |
| cg13259925 | LRAT                               | 8.60E-06    | 0.367633978 |
| cg01892516 | FOXA1                              | 0.002040485 | 0.367631537 |
| cg18295183 | GABRG2;GABRG2;GABRG2;GABRG2;GABRG  | 2.58E-05    | 0.367623607 |
| cg22501604 |                                    | 0.003189589 | 0.367622159 |
| cg25449484 | NR2F1                              | 5.59E-05    | 0.367620278 |
| cg22487414 | NPHS1                              | 5.59E-05    | 0.367617814 |
| cg08044097 | SOX17                              | 0.000537905 | 0.367585083 |
| cg18415791 | OSBPL5;OSBPL5;OSBPL5               | 2.58E-05    | 0.367578018 |
| cg20018912 | INSM2                              | 0.000290372 | 0.367576081 |
| cg08526991 | SOX11                              | 0.004357816 | 0.367575231 |
| cg12212555 | KCNK13                             | 4.34E-05    | 0.367562558 |
| cg01915516 | TP73                               | 0.001948248 | 0.367528603 |
| cg08857797 | VPS25                              | 4.34E-05    | 0.367519717 |
| cg24080008 |                                    | 0.000654035 | 0.367503501 |
| cg21158075 | PRR4;PRH1                          | 0.000187194 | 0.367500328 |
| cg12230289 |                                    | 0.002304201 | 0.367459429 |
| cg19047292 | DKFZP434H168;GNAO1;GNAO1           | 0.000654035 | 0.367447545 |
| cg14546394 | MSC                                | 8.60E-06    | 0.367444751 |
| cg09851545 |                                    | 0.000791389 | 0.367429162 |
| cg25915838 | PGR                                | 0.000117986 | 0.367405366 |
| cg18421529 | MRAS;MRAS                          | 0.000187194 | 0.36740419  |
| cg10274453 |                                    | 1.50E-05    | 0.367374153 |
| cg06470822 |                                    | 8.60E-06    | 0.367368799 |
| cg24381412 |                                    | 0.000290372 | 0.367343608 |
| cg20273670 |                                    | 8.60E-06    | 0.367342595 |
| cg06857116 | ZSWIM7;ZSWIM7                      | 0.000537905 | 0.367328574 |
| cg18324707 | DGKI                               | 0.000187194 | 0.367326146 |
| cg02575948 |                                    | 7.23E-05    | 0.36729247  |
| cg00698685 | DRD1                               | 2.58E-05    | 0.367286153 |
| cg19671120 | CNGA3;CNGA3;CNGA3;CNGA3            | 7.23E-05    | 0.367284539 |
| cg02063759 |                                    | 0.000117986 | 0.367276896 |
| cg11677857 | MMEL1                              | 0.000537905 | 0.367255398 |
| cg00232735 | OPCML                              | 0.000117986 | 0.367243438 |
| cg07316846 |                                    | 0.000117986 | 0.367238013 |
| cg14123232 |                                    | 1.11E-05    | 0.367226883 |
| cg00799984 | NDRG1;NDRG1                        | 1.11E-05    | 0.36721305  |

|            |                                      |             |             |
|------------|--------------------------------------|-------------|-------------|
| cg07853758 | HECW2                                | 0.000233422 | 0.367206145 |
| cg23572908 | VIPR2                                | 0.001639597 | 0.367187228 |
| cg12136772 | SMPD3                                | 8.60E-06    | 0.367181564 |
| cg01566592 | RIMS2                                | 0.001948248 | 0.367180126 |
| cg12164472 | RGS20;RGS20                          | 0.000654035 | 0.367176298 |
| cg09923293 |                                      | 7.23E-05    | 0.367173913 |
| cg22466995 | MFAP3L                               | 0.000791389 | 0.367160444 |
| cg27167224 |                                      | 9.24E-05    | 0.367151061 |
| cg02009585 | PEX5L                                | 1.11E-05    | 0.367150458 |
| cg02184772 |                                      | 7.23E-05    | 0.367123337 |
| cg15950068 | SNAP91;SNAP91                        | 0.000654035 | 0.367085462 |
| cg12804010 | SYT6                                 | 0.000117986 | 0.367082201 |
| cg06722407 | LOC100101938                         | 0.000148457 | 0.367078147 |
| cg14092626 |                                      | 9.24E-05    | 0.367074973 |
| cg04094148 | BARX2                                | 0.000791389 | 0.3670658   |
| cg08460041 | LMX1A                                | 0.00043997  | 0.367046935 |
| cg19656974 |                                      | 1.96E-05    | 0.367045965 |
| cg19607845 | FBXO9;FBXO9;FBXO9                    | 0.000654035 | 0.367028439 |
| cg18839750 | PCDHGA2;PCDHGA3;PCDHGA1;PCDHGA3      | 4.34E-05    | 0.367027773 |
| cg20707323 |                                      | 9.24E-05    | 0.367026317 |
| cg14915878 | MATN4;MATN4;RBPJL;MATN4              | 3.34E-05    | 0.367015023 |
| cg27235148 |                                      | 5.59E-05    | 0.367014241 |
| cg13537353 | ATP8A2                               | 0.001147425 | 0.366991242 |
| cg07806886 | STXBP5L                              | 9.24E-05    | 0.366988447 |
| cg08734600 | NKX1-2                               | 7.23E-05    | 0.366977533 |
| cg10868817 | ZFPM2                                | 0.00043997  | 0.366977268 |
| cg19430967 | TMEM108;TMEM108                      | 5.59E-05    | 0.366954669 |
| cg22461835 | ADRA1A;ADRA1A;ADRA1A;ADRA1A          | 0.000187194 | 0.366934854 |
| cg13415073 |                                      | 4.34E-05    | 0.366906802 |
| cg21535462 | KRR1                                 | 0.000187194 | 0.36689643  |
| cg09317884 | LMX1A                                | 0.000117986 | 0.366875817 |
| cg22335490 | EPB41L3                              | 0.000205664 | 0.366871912 |
| cg27175093 |                                      | 1.96E-05    | 0.366863952 |
| cg05131696 |                                      | 0.001639597 | 0.366862924 |
| cg09792008 | FGF10                                | 0.000187194 | 0.366862546 |
| cg10460820 | ATOH1                                | 1.96E-05    | 0.366860649 |
| cg19239848 | SNAP25;SNAP25                        | 2.58E-05    | 0.366850032 |
| cg00810208 | IDUA                                 | 7.23E-05    | 0.366835877 |
| cg25853622 | LPP;LPP;LPP                          | 0.00043997  | 0.366835709 |
| cg07745624 | KCNIP4                               | 0.000117986 | 0.366819058 |
| cg22840076 | HNRNPUL1;HNRNPUL1                    | 1.11E-05    | 0.366777053 |
| cg07544837 | FAM13C;FAM13C;FAM13C;FAM13C;FAM13C;F | 1.96E-05    | 0.366769608 |
| cg13197216 |                                      | 3.34E-05    | 0.366762455 |
| cg14769207 | SIM2;SIM2                            | 0.000791389 | 0.366760678 |
| cg19850080 | SLC19A3                              | 8.60E-06    | 0.366755689 |
| cg06745030 | B3GNT7                               | 0.001147425 | 0.366754617 |
| cg23065100 | MLF1;MLF1;MLF1                       | 0.000357885 | 0.366751371 |
| cg11839815 | MGLL;MGLL                            | 0.000290372 | 0.366717208 |
| cg02421985 |                                      | 7.23E-05    | 0.366686493 |
| cg01850449 | LYPD1;LYPD1                          | 3.34E-05    | 0.366683705 |
| cg12449916 |                                      | 9.24E-05    | 0.366676801 |
| cg23979412 |                                      | 1.11E-05    | 0.366656172 |
| cg08780398 | LOC100192378                         | 1.11E-05    | 0.366645429 |
| cg15565065 | HOXB4                                | 0.000654035 | 0.366631247 |
| cg04084354 |                                      | 0.000117986 | 0.366622834 |
| cg27059140 |                                      | 9.24E-05    | 0.366581057 |
| cg04702396 | FAM18B2;FAM18B2                      | 0.000791389 | 0.366563871 |
| cg20982735 | PSKH2                                | 8.60E-06    | 0.366561807 |
| cg19462523 | SOX2;SOX2OT;SOX2                     | 0.000117986 | 0.366555067 |
| cg15852312 |                                      | 1.50E-05    | 0.366523758 |

|            |                                    |             |             |
|------------|------------------------------------|-------------|-------------|
| cg15812753 | HOXD3                              | 2.58E-05    | 0.366516022 |
| cg09411999 | HOXA10;HOXA10                      | 0.000187194 | 0.366514075 |
| cg19144866 | GOLSYN;GOLSYN;GOLSYN;GOLSYN;GOLSYN | 0.000357885 | 0.366512202 |
| cg15177613 | TSKS                               | 9.04E-05    | 0.36650476  |
| cg17030233 |                                    | 8.60E-06    | 0.366492408 |
| cg25999722 | ALK                                | 0.000290372 | 0.366482342 |
| cg08104960 | NXN                                | 7.23E-05    | 0.366459151 |
| cg18877252 | SV2C                               | 0.000290372 | 0.366455225 |
| cg02081266 |                                    | 0.004357816 | 0.366453639 |
| cg00453717 | POLD3                              | 0.001639597 | 0.366450195 |
| cg06899551 | FILIP1                             | 8.60E-06    | 0.366443034 |
| cg15987088 | GHSR;GHSR                          | 1.50E-05    | 0.36643862  |
| cg18122419 |                                    | 1.11E-05    | 0.366429412 |
| cg17137424 | TRIM67                             | 1.11E-05    | 0.366408209 |
| cg06333800 | PRKAG2;PRKAG2                      | 8.60E-06    | 0.366408001 |
| cg02735446 | VASH1                              | 8.60E-06    | 0.366389242 |
| cg02192746 | PILRA;PILRA;PILRA                  | 1.11E-05    | 0.366355129 |
| cg17065772 | NR2C2                              | 0.000233422 | 0.366353584 |
| cg10746542 | SSTR1                              | 1.50E-05    | 0.366346579 |
| cg01449144 |                                    | 0.000357885 | 0.366346253 |
| cg21871952 |                                    | 1.50E-05    | 0.366321853 |
| cg24341611 | CA10;CA10;CA10;CA10                | 9.24E-05    | 0.366313221 |
| cg09073398 | SLIT3;SLIT3                        | 2.58E-05    | 0.366279429 |
| cg04569615 | SLC6A5                             | 5.59E-05    | 0.366275389 |
| cg26623444 |                                    | 3.34E-05    | 0.366272928 |
| cg21266559 | CHST8;CHST8                        | 1.96E-05    | 0.366271115 |
| cg16294013 | PDE4B;PDE4B                        | 8.60E-06    | 0.366251119 |
| cg01432663 |                                    | 3.34E-05    | 0.366234906 |
| cg04205034 |                                    | 0.000290372 | 0.36622782  |
| cg05671350 | P4HA3                              | 1.11E-05    | 0.366177243 |
| cg05492904 | CYP19A1;CYP19A1                    | 0.000148457 | 0.366155381 |
| cg14835517 |                                    | 9.24E-05    | 0.366147523 |
| cg16217610 | SGMS2                              | 7.23E-05    | 0.366141559 |
| cg19084726 | PDE4DIP                            | 0.000233422 | 0.366121018 |
| cg05164666 | VAX2                               | 0.000117986 | 0.366113305 |
| cg06980654 |                                    | 0.0050758   | 0.366087185 |
| cg21074260 | SYT13                              | 0.000148457 | 0.366085543 |
| cg24976385 | TBC1D12                            | 0.000117986 | 0.36608387  |
| cg07860213 | PRDM14                             | 0.000537905 | 0.366082151 |
| cg18318878 |                                    | 9.24E-05    | 0.366079366 |
| cg23896164 | SIM2                               | 3.34E-05    | 0.366063406 |
| cg09294077 | GPHN;GPHN                          | 0.000791389 | 0.366061085 |
| cg23473285 | RIMS1;RIMS1                        | 9.24E-05    | 0.366047517 |
| cg09166556 |                                    | 0.000290372 | 0.36604097  |
| cg00644823 |                                    | 8.60E-06    | 0.366034613 |
| cg25924096 | PRDM13                             | 8.60E-06    | 0.366029799 |
| cg15822765 |                                    | 0.002304201 | 0.366027291 |
| cg19759671 | MGC45800                           | 5.59E-05    | 0.36601985  |
| cg17211582 | IGSF21                             | 2.58E-05    | 0.366014646 |
| cg02774439 | HAND2;NBLA00301;HAND2              | 1.11E-05    | 0.365983028 |
| cg08036309 |                                    | 4.34E-05    | 0.365966013 |
| cg04485065 | FBLN5                              | 5.11E-05    | 0.365957306 |
| cg11898009 |                                    | 4.34E-05    | 0.36594598  |
| cg27392804 |                                    | 4.34E-05    | 0.365913072 |
| cg20800086 | ISL1                               | 3.34E-05    | 0.365902831 |
| cg17518931 | MPPED2                             | 0.00043997  | 0.365887134 |
| cg03696599 | CNTNAP5                            | 9.24E-05    | 0.365876227 |
| cg07813031 |                                    | 0.001948248 | 0.365874989 |
| cg02655972 | CDH6                               | 1.96E-05    | 0.365874955 |
| cg21001198 | LRRN4                              | 0.000654035 | 0.365870869 |



|            |                                         |             |             |
|------------|-----------------------------------------|-------------|-------------|
| cg20238412 |                                         | 3.34E-05    | 0.365870515 |
| cg14913969 | GATA6                                   | 0.000537905 | 0.365866065 |
| cg07633851 | RPL26L1;LOC100268168;LOC100268168       | 8.60E-06    | 0.365841165 |
| cg21031345 |                                         | 2.58E-05    | 0.365839438 |
| cg11153071 | RPTOR;RPTOR                             | 1.50E-05    | 0.36583797  |
| cg03347018 | MSC                                     | 1.96E-05    | 0.365837459 |
| cg11186405 |                                         | 0.000357885 | 0.365826809 |
| cg02775804 |                                         | 8.60E-06    | 0.365820013 |
| cg22630755 | NEUROG1                                 | 0.000233422 | 0.365815748 |
| cg12140144 | FLJ42875;PRDM16;FLJ42875;PRDM16         | 0.000148457 | 0.365812896 |
| cg26489413 | AMPD3;AMPD3;AMPD3;AMPD3                 | 0.000187194 | 0.365776903 |
| cg21519701 | TEX2                                    | 0.001376172 | 0.365775225 |
| cg19726179 | H2AFY2                                  | 0.002304201 | 0.36576155  |
| cg07152894 |                                         | 0.001376172 | 0.365733225 |
| cg09213102 | CALB2;CALB2;CALB2                       | 9.24E-05    | 0.365728482 |
| cg23845009 | ABTB2                                   | 0.000187194 | 0.365725411 |
| cg24277791 | LHFPL3                                  | 2.58E-05    | 0.365697906 |
| cg04457979 | KCNQ1DN                                 | 0.000148457 | 0.365681938 |
| cg06440519 | SYT3;SYT3;SYT3                          | 4.34E-05    | 0.365679446 |
| cg02105519 | PCDHA7;PCDHA12;PCDHA6;PCDHAC1;PCDH      | 0.000148457 | 0.365676838 |
| cg16024318 | SLC6A7;SLC6A7                           | 0.000148457 | 0.365672192 |
| cg26215967 | SH3GL3;SH3GL3                           | 0.000117986 | 0.365661471 |
| cg11142981 | BICC1                                   | 8.60E-06    | 0.365655428 |
| cg18921954 |                                         | 8.60E-06    | 0.365650321 |
| cg10655021 |                                         | 0.001639597 | 0.365646953 |
| cg05568490 |                                         | 8.60E-06    | 0.365645944 |
| cg14566959 | PCDHGA4;PCDHGA6;PCDHGA1;PCDHGA5;PC      | 0.000117986 | 0.3656425   |
| cg19947463 | C7orf50;C7orf50;C7orf50                 | 0.000148457 | 0.365635362 |
| cg23817893 | CCDC81;CCDC81;CCDC81;CCDC81             | 0.002714607 | 0.365618616 |
| cg24595152 | ABHD5                                   | 3.34E-05    | 0.365617239 |
| cg17933583 |                                         | 8.60E-06    | 0.365617061 |
| cg02273041 | PRKCDPB                                 | 0.000233422 | 0.365584624 |
| cg07345734 | NKX2-1;NKX2-1                           | 9.24E-05    | 0.365578293 |
| cg25186143 | FAM57A                                  | 0.000357885 | 0.365566897 |
| cg13139972 | DKK2;DKK2                               | 0.000537905 | 0.365546328 |
| cg15672768 | PCDHGA4;PCDHGA2;PCDHGB2;PCDHGA1;PC      | 3.34E-05    | 0.365543703 |
| cg24766229 | C17orf99                                | 2.58E-05    | 0.365538794 |
| cg14514813 | PCDHA6;PCDHA2;PCDHA1;PCDHA9;PCDHA7      | 8.60E-06    | 0.365529159 |
| cg00691830 | MEIS2;MEIS2;MEIS2;MEIS2;MEIS2;MEIS2;MEI | 1.96E-05    | 0.365521547 |
| cg07085827 | LOC150786;LOC150786                     | 4.34E-05    | 0.365517316 |
| cg06211872 | TBX3;TBX3                               | 0.000117986 | 0.365496363 |
| cg03844506 |                                         | 4.34E-05    | 0.365490904 |
| cg16043144 | CPEB1                                   | 1.11E-05    | 0.365473954 |
| cg08616061 | PCDHGA4;PCDHGA1;PCDHGA6;PCDHGA5;PC      | 8.60E-06    | 0.365465399 |
| cg01261013 | MORC3                                   | 1.50E-05    | 0.365460878 |
| cg10751070 |                                         | 5.59E-05    | 0.36543982  |
| cg03940684 | CHL1                                    | 0.000955793 | 0.365437665 |
| cg10591607 | GRIK2;GRIK2;GRIK2;GRIK2;GRIK2;GRIK2     | 1.11E-05    | 0.365431229 |
| cg20110349 | LOC222699                               | 0.000187194 | 0.365405582 |
| cg01601050 | STXBP6                                  | 0.000117986 | 0.365401774 |
| cg13472192 |                                         | 0.000148457 | 0.365399141 |
| cg16330450 | NPBWR1                                  | 2.58E-05    | 0.365394684 |
| cg00884606 | NOL4                                    | 0.000117986 | 0.365393897 |
| cg27132391 | PRKCDPB                                 | 5.59E-05    | 0.365391236 |
| cg11699845 | DPY19L2P4                               | 1.11E-05    | 0.365375538 |
| cg04188862 |                                         | 0.000537905 | 0.365375239 |
| cg16179952 | SNTG2                                   | 1.50E-05    | 0.365369592 |
| cg21443659 |                                         | 0.000117986 | 0.365367272 |
| cg16776981 | BAHCC1                                  | 5.59E-05    | 0.365366908 |
| cg12059112 |                                         | 0.000537905 | 0.365363122 |

|            |                                    |             |             |
|------------|------------------------------------|-------------|-------------|
| cg03405515 | MAP9                               | 0.001948248 | 0.365359012 |
| cg00014998 | HOXD4;MIR10B                       | 0.000290372 | 0.365352811 |
| cg24073122 | TP73;WDR8                          | 0.000187194 | 0.365340225 |
| cg27040468 | BICC1                              | 0.000791389 | 0.365329811 |
| cg09069886 |                                    | 3.34E-05    | 0.365314374 |
| cg06178563 | NKX2-2                             | 7.23E-05    | 0.36531388  |
| cg03893271 | WBSCR17                            | 0.000357885 | 0.365313495 |
| cg04922029 | DARC;DARC;DARC                     | 0.000233422 | 0.365306167 |
| cg23901852 | FAT4                               | 9.24E-05    | 0.365304274 |
| cg05581878 |                                    | 0.001948248 | 0.365296524 |
| cg11485152 | TRNT1                              | 0.000117986 | 0.365286952 |
| cg08999807 | GPC5                               | 5.59E-05    | 0.365279388 |
| cg13200848 | GLP1R                              | 0.000654035 | 0.365271932 |
| cg10575261 | ZNF454                             | 0.000187194 | 0.36526204  |
| cg08548498 | SLPI                               | 0.000537905 | 0.365259723 |
| cg00752195 |                                    | 8.60E-06    | 0.365242669 |
| cg15183258 | MGA;MGA                            | 0.000233422 | 0.365242127 |
| cg11687036 |                                    | 4.34E-05    | 0.365239404 |
| cg07212852 |                                    | 1.96E-05    | 0.365239197 |
| cg14345012 | MIR663                             | 1.50E-05    | 0.365219709 |
| cg22558871 | NSUN5;NSUN5;NSUN5;NSUN5            | 0.000122184 | 0.365216257 |
| cg01765403 | SHISA4;SHISA4;SHISA4               | 5.59E-05    | 0.365211724 |
| cg20267441 | VAX2                               | 0.000537905 | 0.365203136 |
| cg10308906 |                                    | 0.000205664 | 0.365195544 |
| cg00405198 | TFAP2A                             | 5.59E-05    | 0.365190291 |
| cg23542968 | SFTA3                              | 8.60E-06    | 0.365176452 |
| cg24352971 |                                    | 7.23E-05    | 0.365160839 |
| cg19034038 | DBX2                               | 3.34E-05    | 0.365152769 |
| cg00083018 |                                    | 1.96E-05    | 0.365150986 |
| cg16801887 |                                    | 0.000187194 | 0.365137783 |
| cg18325192 | CSGALNACT1;CSGALNACT1              | 5.59E-05    | 0.365117206 |
| cg06971129 | EDNRB;EDNRB;EDNRB                  | 0.001147425 | 0.365117074 |
| cg17040471 | CHODL                              | 4.34E-05    | 0.365116995 |
| cg12066624 | LGI2                               | 3.34E-05    | 0.365093069 |
| cg14957547 | CYP1B1                             | 0.000791389 | 0.365084189 |
| cg19806849 | TRIM67                             | 2.58E-05    | 0.36508201  |
| cg22758714 |                                    | 0.000290372 | 0.365072956 |
| cg09563922 |                                    | 8.60E-06    | 0.365069602 |
| cg18036763 | PHF21B;PHF21B                      | 3.34E-05    | 0.365061249 |
| cg18763165 |                                    | 0.000117986 | 0.365044296 |
| cg17816394 | GNG4;GNG4;GNG4;GNG4;GNG4           | 0.000290372 | 0.365030278 |
| cg26994526 | MYO5B                              | 1.96E-05    | 0.365010071 |
| cg13581015 |                                    | 0.000791389 | 0.365009612 |
| cg16790847 | ZIC4;ZIC4;ZIC4                     | 2.58E-05    | 0.364982091 |
| cg00548268 | NPTX2                              | 8.60E-06    | 0.364969134 |
| cg12355110 |                                    | 1.11E-05    | 0.36495073  |
| cg02018465 | MAPK15                             | 3.34E-05    | 0.364947816 |
| cg17336584 | PHACTR1                            | 1.50E-05    | 0.364947493 |
| cg20807545 | ADAMTS18                           | 7.23E-05    | 0.364928297 |
| cg23262897 | PCDHGA2;PCDHGA1;PCDHGA2            | 7.23E-05    | 0.364923865 |
| cg11474182 | CNTNAP3                            | 1.50E-05    | 0.364916451 |
| cg14553243 | CYP27A1;CYP27A1                    | 3.34E-05    | 0.364906037 |
| cg11184748 |                                    | 1.11E-05    | 0.364893635 |
| cg21184415 | EMILIN3                            | 1.50E-05    | 0.364892467 |
| cg01699630 | ARG1                               | 4.34E-05    | 0.364891153 |
| cg08522340 | CTSC;CTSC;CTSC                     | 9.24E-05    | 0.364842579 |
| cg04874782 |                                    | 0.000654035 | 0.364822365 |
| cg08997628 | SOX21                              | 0.00041966  | 0.364800987 |
| cg22752008 | COL4A3;COL4A3;COL4A3;COL4A3;COL4A4 | 8.60E-06    | 0.364799351 |
| cg14889768 | RAB32                              | 4.34E-05    | 0.364779229 |

|            |                                         |             |             |
|------------|-----------------------------------------|-------------|-------------|
| cg01115380 |                                         | 0.000290372 | 0.364764024 |
| cg04008252 | NPFFR2                                  | 0.00043997  | 0.364760606 |
| cg07609862 | MTNR1B                                  | 1.11E-05    | 0.364759687 |
| cg05488770 | LHFPL3                                  | 7.23E-05    | 0.364746026 |
| cg09559021 | CSMD2                                   | 8.60E-06    | 0.364745296 |
| cg14138540 |                                         | 9.24E-05    | 0.364738805 |
| cg06484100 |                                         | 4.34E-05    | 0.364733576 |
| cg12549600 |                                         | 0.000148457 | 0.364727416 |
| cg00832329 | PACS2;PACS2                             | 9.24E-05    | 0.364723553 |
| cg12323063 | MAP2K6                                  | 1.96E-05    | 0.364719546 |
| cg13518604 | NFIB;NFIB                               | 7.23E-05    | 0.364690111 |
| cg10967350 | CNTN4                                   | 1.96E-05    | 0.364684357 |
| cg15347189 | SST                                     | 4.34E-05    | 0.364683108 |
| cg01070209 | SRRM4                                   | 0.001147425 | 0.364666975 |
| cg24488059 | PPAPDC1A                                | 0.000148457 | 0.364658607 |
| cg13060157 |                                         | 4.34E-05    | 0.364654389 |
| cg17986181 |                                         | 5.59E-05    | 0.364634177 |
| cg04712949 | CALCR;CALCR                             | 1.50E-05    | 0.364595352 |
| cg05294112 |                                         | 5.59E-05    | 0.364592827 |
| cg11618529 | ZNF132                                  | 1.11E-05    | 0.364578649 |
| cg00913954 | STK40                                   | 0.000290372 | 0.36456145  |
| cg14435109 | SGPP2                                   | 5.59E-05    | 0.364555468 |
| cg17327401 | CPE                                     | 0.000148457 | 0.364548333 |
| cg01616682 | CALCB                                   | 0.00043997  | 0.364539435 |
| cg04932544 | SYT14;SYT14;SYT14;SYT14;SYT14;SYT14     | 4.34E-05    | 0.364526754 |
| cg15105326 | ZIC4;ZIC4;ZIC4;ZIC4;ZIC4                | 2.58E-05    | 0.364523088 |
| cg04056384 | PCDHB17                                 | 0.000233422 | 0.364522829 |
| cg01574663 | HS3ST2                                  | 1.50E-05    | 0.364517393 |
| cg18956481 | CYP24A1;CYP24A1;CYP24A1;CYP24A1         | 0.000537905 | 0.364514062 |
| cg13480357 | CCDC108;CCDC108                         | 2.58E-05    | 0.36450432  |
| cg22434409 | KCNIP4                                  | 9.24E-05    | 0.364496032 |
| cg06102775 |                                         | 8.60E-06    | 0.36447634  |
| cg17990197 | KIAA1755                                | 3.34E-05    | 0.364474379 |
| cg08858210 | TSPYL5                                  | 0.002304201 | 0.364472706 |
| cg14086364 | SLC36A3;SLC36A3                         | 5.59E-05    | 0.364426499 |
| cg05683630 |                                         | 1.50E-05    | 0.364414691 |
| cg21208104 | PRSS12                                  | 1.50E-05    | 0.364409339 |
| cg19586288 | RELN;RELN                               | 8.60E-06    | 0.364396453 |
| cg24089600 | COL4A1;COL4A2                           | 0.00043997  | 0.364389855 |
| cg15405439 | EPHA6                                   | 1.11E-05    | 0.364389781 |
| cg19398269 |                                         | 8.60E-06    | 0.364364987 |
| cg13722700 | GPRIN2                                  | 0.000233422 | 0.364357147 |
| cg09747169 |                                         | 0.000117986 | 0.364331982 |
| cg26136772 | FOXK1                                   | 3.34E-05    | 0.364320472 |
| cg02022808 | PCDHGA4;PCDHGA2;PCDHGA5;PCDHGB2;PCDHGB1 | 0.000537905 | 0.364310985 |
| cg12782933 |                                         | 0.000233422 | 0.364309596 |
| cg10943359 | MARCH1                                  | 1.50E-05    | 0.364283365 |
| cg05954830 |                                         | 0.000955793 | 0.36427503  |
| cg05369857 |                                         | 0.000187194 | 0.364255834 |
| cg16834823 | TNXB                                    | 0.000357885 | 0.364243315 |
| cg23395449 |                                         | 4.34E-05    | 0.364232297 |
| cg00292986 | SLC9A2                                  | 0.00043997  | 0.364224228 |
| cg17586860 | SSTR4                                   | 2.58E-05    | 0.364217532 |
| cg13923018 | PDZD2                                   | 3.34E-05    | 0.364214961 |
| cg17441062 | GRM5;GRM5                               | 0.000117986 | 0.364212346 |
| cg14871932 | GCK;GCK;GCK                             | 0.000357885 | 0.364208181 |
| cg20435474 |                                         | 0.000148457 | 0.364201208 |
| cg08519575 | FAM164A                                 | 0.000148457 | 0.364158813 |
| cg19907776 |                                         | 0.000187194 | 0.364150077 |
| cg22371972 | SLC17A6                                 | 0.000233422 | 0.364146493 |

|            |                                         |             |             |
|------------|-----------------------------------------|-------------|-------------|
| cg15400238 | RPRM                                    | 7.23E-05    | 0.364128763 |
| cg02076785 | CNGA3;CNGA3                             | 0.000233422 | 0.364127908 |
| cg02865818 | WWC1;WWC1;WWC1                          | 3.34E-05    | 0.364125019 |
| cg22523050 | CREB3L2                                 | 7.23E-05    | 0.364123195 |
| cg22797270 | NRXN2;NRXN2;NRXN2                       | 8.60E-06    | 0.364119826 |
| cg13740815 | SHANK1                                  | 0.000148457 | 0.364118579 |
| cg14542583 | SPRED3                                  | 2.58E-05    | 0.364109551 |
| cg09355771 |                                         | 5.59E-05    | 0.364101063 |
| cg25771013 | MIR148A                                 | 2.58E-05    | 0.364094449 |
| cg23894086 |                                         | 2.58E-05    | 0.364090537 |
| cg05312353 |                                         | 0.000290372 | 0.364065501 |
| cg09371047 | ZNF214;NLRP14                           | 0.000187194 | 0.364052207 |
| cg24931242 |                                         | 3.34E-05    | 0.364046474 |
| cg16656979 |                                         | 0.000117986 | 0.364017349 |
| cg10739556 |                                         | 1.96E-05    | 0.364011715 |
| cg07881365 |                                         | 2.58E-05    | 0.364009662 |
| cg21870668 | SNRPN;SNRPN;SNRPN;SNRPN                 | 1.96E-05    | 0.363996917 |
| cg03966785 | PDGFRA                                  | 0.000791389 | 0.363987403 |
| cg25794153 |                                         | 1.11E-05    | 0.363981633 |
| cg01984802 |                                         | 9.24E-05    | 0.363981171 |
| cg08089301 | HOXB4                                   | 0.000233422 | 0.36397328  |
| cg26717983 | RIMS1                                   | 0.000148457 | 0.3639381   |
| cg13464915 | CDH2;CDH2                               | 0.000654035 | 0.363930539 |
| cg03810428 |                                         | 1.50E-05    | 0.363923666 |
| cg08688551 | KCNJ8                                   | 0.000654035 | 0.363921316 |
| cg21825879 |                                         | 0.000117986 | 0.363913883 |
| cg22328256 |                                         | 1.50E-05    | 0.363889751 |
| cg18812353 | RFX7                                    | 4.34E-05    | 0.363882496 |
| cg18947801 | LPPR4;LPPR4                             | 8.60E-06    | 0.363867659 |
| cg04912999 | PAQR9                                   | 0.000654035 | 0.363842492 |
| cg06102330 | MSC                                     | 2.58E-05    | 0.363842391 |
| cg16926102 |                                         | 2.58E-05    | 0.363832814 |
| cg12033822 | SLC35C2;SLC35C2;SLC35C2                 | 5.59E-05    | 0.363829994 |
| cg22624022 |                                         | 0.000187194 | 0.363810066 |
| cg01855272 | EPHA10                                  | 0.000537905 | 0.363790626 |
| cg19351604 | ARHGEF10                                | 0.000537905 | 0.363777112 |
| cg06341054 | SPATA18                                 | 0.000148457 | 0.36377063  |
| cg17451941 |                                         | 0.00043997  | 0.363769745 |
| cg08681924 | FEZF2                                   | 0.000357885 | 0.3637691   |
| cg19037350 | PCDHGA4;PCDHGA4;PCDHGA2;PCDHGA1;PCDHGA1 | 1.96E-05    | 0.363758329 |
| cg07825294 | DAZAP1;DAZAP1                           | 5.59E-05    | 0.363757978 |
| cg13677149 | EVX1                                    | 0.000955793 | 0.36375237  |
| cg06865642 | BRD1;LOC90834                           | 3.34E-05    | 0.36373189  |
| cg04914946 | METTL9;IGSF6;IGSF6;METTL9               | 0.000955793 | 0.363731219 |
| cg02057782 | ATP8A2                                  | 1.11E-05    | 0.363726736 |
| cg04328162 | HS6ST3;HS6ST3                           | 1.50E-05    | 0.363722098 |
| cg24386894 | ERI1                                    | 3.34E-05    | 0.363720156 |
| cg15061981 | UGT8                                    | 8.60E-06    | 0.363711085 |
| cg20124587 | HOXD11                                  | 1.50E-05    | 0.363702354 |
| cg14670974 | C5orf52                                 | 0.000290372 | 0.363655466 |
| cg27547442 |                                         | 3.34E-05    | 0.363644462 |
| cg02165355 | ZNF454                                  | 9.24E-05    | 0.363636412 |
| cg22178613 | SFRP2                                   | 0.000187194 | 0.363631917 |
| cg08905487 | LAIR2;LAIR2                             | 0.002714607 | 0.363615341 |
| cg01042246 | SP5                                     | 0.000233422 | 0.363614344 |
| cg06675190 | ACAN;ACAN                               | 5.59E-05    | 0.363603954 |
| cg21947094 | FAM189A1                                | 3.34E-05    | 0.363587348 |
| cg17457560 | NRG1;NRG1;NRG1;NRG1;NRG1;NRG1;NRG1;     | 0.00043997  | 0.36358352  |
| cg26612727 | ZPBP2;ZPBP2                             | 2.58E-05    | 0.363578884 |
| cg14430542 |                                         | 1.96E-05    | 0.363569567 |

|            |                                         |             |             |
|------------|-----------------------------------------|-------------|-------------|
| cg11402363 | ADCYAP1;ADCYAP1                         | 3.34E-05    | 0.363540969 |
| cg04089901 | COL28A1                                 | 0.000117986 | 0.363528724 |
| cg03869608 | PDZRN3                                  | 2.58E-05    | 0.363514207 |
| cg16096172 |                                         | 1.50E-05    | 0.363498642 |
| cg05342515 |                                         | 4.34E-05    | 0.363498178 |
| cg02305723 | SNRPN;SNRPN;SNRPN                       | 8.60E-06    | 0.363486939 |
| cg15669183 | FAM155A                                 | 9.24E-05    | 0.363451685 |
| cg07437373 |                                         | 5.59E-05    | 0.363441399 |
| cg11168614 |                                         | 0.000233422 | 0.36342987  |
| cg13279673 |                                         | 7.23E-05    | 0.363422337 |
| cg02721902 |                                         | 3.34E-05    | 0.363408239 |
| cg11302943 | CRTAC1                                  | 9.24E-05    | 0.363398544 |
| cg19384289 | HOXD8                                   | 0.000148457 | 0.36338729  |
| cg12798118 | PMP22;PMP22                             | 1.50E-05    | 0.3633866   |
| cg21729992 |                                         | 9.24E-05    | 0.36336771  |
| cg01511356 |                                         | 1.96E-05    | 0.363360252 |
| cg21632975 | NOVA2                                   | 1.96E-05    | 0.363358917 |
| cg09020199 | TRIM39;TRIM39                           | 1.96E-05    | 0.363352525 |
| cg14142283 | ISL1                                    | 8.60E-06    | 0.363351169 |
| cg10730174 | PRRX1;PRRX1                             | 0.000148457 | 0.363342985 |
| cg17019053 | C2orf65                                 | 3.34E-05    | 0.363329953 |
| cg04464276 | SMPD3                                   | 0.000187194 | 0.363310853 |
| cg15586392 | SLC45A4                                 | 0.000148457 | 0.363307216 |
| cg17932662 | PTPN7;PTPN7                             | 4.34E-05    | 0.363302272 |
| cg00127167 | ADAMTS16                                | 3.34E-05    | 0.363292238 |
| cg07905808 | TRIM39;TRIM39                           | 1.96E-05    | 0.363278679 |
| cg18049638 |                                         | 4.34E-05    | 0.36326887  |
| cg10710218 | ACOT11;ACOT11                           | 8.60E-06    | 0.363245608 |
| cg18189994 |                                         | 2.58E-05    | 0.3632414   |
| cg07283114 | LOC401463                               | 0.000187194 | 0.363193744 |
| cg10941566 | CABP7                                   | 0.00043997  | 0.363186556 |
| cg00824767 |                                         | 0.000148457 | 0.363185268 |
| cg26149275 | EVX2                                    | 7.23E-05    | 0.363178807 |
| cg23125492 | PAX6;PAX6;PAX6                          | 2.58E-05    | 0.363165475 |
| cg02907098 | ANO2                                    | 1.11E-05    | 0.363158016 |
| cg08665243 | PCDHB16                                 | 4.34E-05    | 0.363154571 |
| cg14504259 |                                         | 5.59E-05    | 0.363141697 |
| cg19871394 | TMEM170B                                | 8.60E-06    | 0.363096761 |
| cg25061843 |                                         | 1.96E-05    | 0.363088058 |
| cg14081218 | CTNND2;CTNND2                           | 1.96E-05    | 0.363064182 |
| cg08318726 | TBX5;TBX5;TBX5                          | 0.000537905 | 0.363059113 |
| cg05044185 | GABRA5;GABRA5;GABRA5                    | 7.23E-05    | 0.363048259 |
| cg22906273 | PAX1                                    | 4.34E-05    | 0.363046313 |
| cg02386403 | FOXF2                                   | 8.60E-06    | 0.363037147 |
| cg00361495 | TRIL                                    | 0.001948248 | 0.363031334 |
| cg17763354 | RGR;RGR;RGR                             | 1.96E-05    | 0.363030683 |
| cg00157199 |                                         | 0.000357885 | 0.363026212 |
| cg13077519 | HTR1B                                   | 2.58E-05    | 0.363012647 |
| cg05374412 | CDH13                                   | 0.000187194 | 0.362995531 |
| cg16967583 | AGXT                                    | 1.50E-05    | 0.362989073 |
| cg15829088 |                                         | 2.58E-05    | 0.362982685 |
| cg26708220 | MEIS2;MEIS2;MEIS2;MEIS2;MEIS2;MEIS2;MEI | 0.000357885 | 0.362976245 |
| cg21500166 | KCNC2;KCNC2;KCNC2;KCNC2;KCNC2;KCNC2     | 2.58E-05    | 0.362974488 |
| cg20414996 | ANKRD34B;ANKRD34B                       | 1.96E-05    | 0.362972923 |
| cg27304110 | SYT6                                    | 0.000357885 | 0.36295656  |
| cg11471772 | SIM1                                    | 0.000654035 | 0.362947528 |
| cg13950829 | CUGBP2;CUGBP2                           | 2.58E-05    | 0.362946236 |
| cg04527363 | GRM7;GRM7                               | 2.58E-05    | 0.362941141 |
| cg15311814 |                                         | 0.00043997  | 0.362940589 |
| cg16151977 | OCLN                                    | 5.59E-05    | 0.362929895 |

|            |                                     |             |             |
|------------|-------------------------------------|-------------|-------------|
| cg11800620 | ESRRG                               | 9.24E-05    | 0.362923164 |
| cg01500945 | SALL1;SALL1                         | 0.001147425 | 0.362922102 |
| cg24116870 | ADAMTS20                            | 1.50E-05    | 0.362897511 |
| cg02227879 | CAMK2G;CAMK2G;CAMK2G;CAMK2G;CAMK2   | 0.002714607 | 0.362890803 |
| cg10425861 |                                     | 5.59E-05    | 0.362883559 |
| cg10711209 | NPHS2                               | 7.23E-05    | 0.362882511 |
| cg04452311 |                                     | 2.58E-05    | 0.362882253 |
| cg23173688 |                                     | 8.60E-06    | 0.362866187 |
| cg17943279 |                                     | 4.34E-05    | 0.362860631 |
| cg07688988 | ACOXL;ACOXL;ACOXL;ACOXL;ACOXL;ACOXL | 3.34E-05    | 0.36284276  |
| cg25730685 |                                     | 0.000187194 | 0.362840017 |
| cg04079248 | ARL4A;ARL4A;ARL4A                   | 0.004131428 | 0.362835064 |
| cg14543285 | RCOR1                               | 8.60E-06    | 0.362833828 |
| cg11679177 | RGS7                                | 0.000654035 | 0.362818403 |
| cg16652303 |                                     | 0.000117986 | 0.362816424 |
| cg26059468 | SOX17;SOX17                         | 0.000537905 | 0.362815389 |
| cg16943529 | EOMES                               | 0.000148457 | 0.362808107 |
| cg00478884 | RNASE10                             | 5.59E-05    | 0.362786143 |
| cg02861504 | FCAMR;FCAMR;FCAMR;FCAMR             | 0.000148457 | 0.362782038 |
| cg03833880 |                                     | 3.34E-05    | 0.362777571 |
| cg20673829 | VIPR2                               | 0.0050758   | 0.362767062 |
| cg11997899 | DLX5                                | 0.002714607 | 0.362765015 |
| cg01410359 | CYP1B1                              | 8.60E-06    | 0.362757274 |
| cg04264299 | SCARA3;SCARA3                       | 0.007873393 | 0.362737962 |
| cg20896728 |                                     | 8.60E-06    | 0.362718895 |
| cg01717727 | ADAMTS16                            | 4.34E-05    | 0.362713792 |
| cg07274716 | PITX1                               | 0.000117986 | 0.362713298 |
| cg17560332 | BOLL;BOLL                           | 1.11E-05    | 0.362700458 |
| cg23634124 | DLX4;DLX4                           | 0.000117986 | 0.362691426 |
| cg01373292 | CAMTA1                              | 0.004357816 | 0.362686902 |
| cg04205107 | PLD5                                | 0.000233422 | 0.362673378 |
| cg13302823 | SCRT1                               | 1.50E-05    | 0.362641402 |
| cg11841771 |                                     | 7.23E-05    | 0.362624728 |
| cg21327694 | CCK                                 | 0.000290372 | 0.362615545 |
| cg13529755 |                                     | 5.59E-05    | 0.362568584 |
| cg14138235 |                                     | 0.007873393 | 0.362546457 |
| cg08730245 | NPFF                                | 2.58E-05    | 0.362543197 |
| cg02031245 | CSMD2                               | 0.000187194 | 0.362527121 |
| cg22968936 | PAX9                                | 5.59E-05    | 0.362496483 |
| cg19443257 | SPSB4                               | 0.003734675 | 0.36248567  |
| cg17331920 | ANKFY1                              | 3.34E-05    | 0.362475491 |
| cg03880355 | FAM169A                             | 0.000233422 | 0.362473687 |
| cg09848789 | MCOLN2                              | 0.000791389 | 0.362437052 |
| cg05255275 | C14orf39                            | 7.23E-05    | 0.362433631 |
| cg15698842 | CDH2                                | 7.23E-05    | 0.362411759 |
| cg15450160 | POP1;POP1;HRSP12;POP1               | 0.000654035 | 0.362408087 |
| cg01664666 | PLD5                                | 0.000233422 | 0.362407382 |
| cg23253569 | OLIG2                               | 0.000148457 | 0.362406231 |
| cg12730468 |                                     | 0.000233422 | 0.362389167 |
| cg03774463 | DLX6AS;DLX6                         | 0.000955793 | 0.36237169  |
| cg25033364 | KCNC1;KCNC1                         | 0.000117986 | 0.362357164 |
| cg08183317 | TFDP1;TFDP1                         | 0.001147425 | 0.362353359 |
| cg22692549 |                                     | 5.59E-05    | 0.362344031 |
| cg03088791 | PLCE1                               | 5.59E-05    | 0.36233629  |
| cg09535924 | MEIS1                               | 0.000233422 | 0.36229283  |
| cg13696609 | FOXE1;FOXE1                         | 1.50E-05    | 0.362289008 |
| cg25344503 | PPYR1                               | 0.000233422 | 0.362286267 |
| cg11854981 | TRERF1                              | 0.000290372 | 0.362278182 |
| cg01676182 |                                     | 1.11E-05    | 0.362272206 |
| cg18882407 | MAP1LC3C                            | 3.34E-05    | 0.362266401 |

|            |                                 |             |             |
|------------|---------------------------------|-------------|-------------|
| cg13266435 | ANKRD30B                        | 0.002714607 | 0.362239746 |
| cg14741153 | PLCE1                           | 0.000117986 | 0.362231645 |
| cg24101578 | CDH22;CDH22                     | 8.60E-06    | 0.362229736 |
| cg25535027 | SLC39A7;SLC39A7;RXRB;SLC39A7    | 2.58E-05    | 0.362222086 |
| cg10937591 | KCND3;KCND3                     | 5.59E-05    | 0.362220037 |
| cg25773262 | BCAN;BCAN                       | 9.24E-05    | 0.362209831 |
| cg24881834 | ME1                             | 1.50E-05    | 0.362186053 |
| cg01204927 |                                 | 7.23E-05    | 0.362173589 |
| cg07126263 | CCBE1                           | 0.000187194 | 0.362136657 |
| cg15928093 | FZD10;FZD10                     | 0.000654035 | 0.362134822 |
| cg21495349 | C7orf50;C7orf50;C7orf50         | 4.34E-05    | 0.362097749 |
| cg14325153 | PRR23C                          | 8.60E-06    | 0.362084946 |
| cg07967679 | KRT7                            | 3.34E-05    | 0.362068129 |
| cg23614791 | ACSS3                           | 8.60E-06    | 0.362052944 |
| cg21726079 |                                 | 0.000148457 | 0.362015754 |
| cg08376864 | MGC2889;HRASLS                  | 5.59E-05    | 0.362015257 |
| cg00266322 | FADS6                           | 0.000654035 | 0.362013643 |
| cg00347369 | STMN2                           | 1.11E-05    | 0.362003967 |
| cg18095675 | BDH1;BDH1;BDH1                  | 1.11E-05    | 0.362001711 |
| cg03213352 | KCNC3                           | 5.59E-05    | 0.361994002 |
| cg10440877 |                                 | 2.58E-05    | 0.361987974 |
| cg16792302 | MAP1D                           | 0.008944659 | 0.36196541  |
| cg16759888 | CYP39A1;SLC25A27                | 0.000233422 | 0.361964686 |
| cg08016383 | ADAMTS17                        | 0.001376172 | 0.361964642 |
| cg03989260 | TBX15                           | 8.60E-06    | 0.361948723 |
| cg19040483 | DLC1;DLC1                       | 1.50E-05    | 0.361930343 |
| cg10040836 | NR2F2;NR2F2;NR2F2;MIR1469;NR2F2 | 7.23E-05    | 0.361893489 |
| cg15167202 | SYNPO;SYNPO                     | 7.23E-05    | 0.361887805 |
| cg10397678 |                                 | 3.34E-05    | 0.36188543  |
| cg07959771 |                                 | 1.96E-05    | 0.361875908 |
| cg20532999 | MIR548H4;NOX5                   | 1.96E-05    | 0.361872746 |
| cg13951074 |                                 | 0.000117986 | 0.361872322 |
| cg08558873 | ZNF214;NLRP14;ZNF214            | 8.60E-06    | 0.36186372  |
| cg00193200 | STXBP5L                         | 9.24E-05    | 0.361836796 |
| cg17695462 | DPYSL4                          | 2.58E-05    | 0.361835439 |
| cg19793697 | RTBDN                           | 0.000187194 | 0.361804588 |
| cg13412550 | ASTN2;ASTN2;ASTN2               | 1.96E-05    | 0.361794963 |
| cg11932158 | PLCH1                           | 9.24E-05    | 0.361791947 |
| cg22274234 | KCTD10                          | 1.96E-05    | 0.361745752 |
| cg08815081 | MKX                             | 7.23E-05    | 0.361738881 |
| cg20629239 | DRD2;DRD2                       | 9.24E-05    | 0.361738511 |
| cg14016177 |                                 | 0.000791389 | 0.361722838 |
| cg27010159 | SRRM4                           | 0.000654035 | 0.361717965 |
| cg06563089 | KCNC2;KCNC2;KCNC2               | 8.60E-06    | 0.361694997 |
| cg27569300 | SYNM;SYNM                       | 0.002714607 | 0.361681037 |
| cg06609197 | STMN2                           | 1.96E-05    | 0.361679637 |
| cg16238918 | PARD6G                          | 0.000233422 | 0.361652911 |
| cg03191889 | PARM1                           | 0.006823935 | 0.361651239 |
| cg10272601 | WNK2                            | 0.001948248 | 0.36164908  |
| cg14291919 | C11orf90                        | 0.000654035 | 0.361636673 |
| cg15048991 | ADAMTS16                        | 0.000357885 | 0.361626974 |
| cg06899044 |                                 | 4.34E-05    | 0.361624777 |
| cg11576834 | OGDHL;OGDHL;OGDHL               | 7.23E-05    | 0.361620789 |
| cg22231400 | SLC17A7                         | 0.000537905 | 0.361610507 |
| cg09948350 | ASPRV1;ASPRV1                   | 1.96E-05    | 0.361606457 |
| cg24955204 |                                 | 4.34E-05    | 0.361570037 |
| cg01688936 | C16orf93                        | 1.11E-05    | 0.361563701 |
| cg24454932 |                                 | 0.001147425 | 0.361552639 |
| cg25724201 | PKIB;PKIB;PKIB                  | 9.24E-05    | 0.361530018 |
| cg16498194 | FZD10                           | 3.34E-05    | 0.361492857 |

|            |                         |             |             |
|------------|-------------------------|-------------|-------------|
| cg24595580 | FLJ42289;FLJ42289       | 0.000791389 | 0.361478037 |
| cg05052450 |                         | 9.24E-05    | 0.361473478 |
| cg01013590 | SCTR                    | 5.59E-05    | 0.361459186 |
| cg22333960 | IGSF21                  | 0.000148457 | 0.361444691 |
| cg02701625 | VWC2L                   | 7.23E-05    | 0.361397582 |
| cg14066298 | TRIM39;TRIM39           | 5.59E-05    | 0.361397553 |
| cg07078225 |                         | 0.000290372 | 0.361385584 |
| cg04408595 | EIF4E3;EIF4E3;GPR27     | 9.24E-05    | 0.361375314 |
| cg00642749 | SEMA5A                  | 0.00043997  | 0.361366928 |
| cg05542262 | RASGRF2                 | 0.000537905 | 0.361366502 |
| cg06654079 | DNAH3;TMEM159           | 7.23E-05    | 0.36134905  |
| cg13788515 | ZDBF2                   | 0.000148457 | 0.361337081 |
| cg24271863 |                         | 1.11E-05    | 0.361334757 |
| cg16199881 | FAM149A                 | 0.000187194 | 0.361325917 |
| cg23208590 | CARD10                  | 7.23E-05    | 0.361325577 |
| cg14024242 |                         | 3.34E-05    | 0.361298503 |
| cg27438889 | TACC2;TACC2;TACC2;TACC2 | 4.34E-05    | 0.361293829 |
| cg12050497 | FAM84A                  | 8.60E-06    | 0.361292626 |
| cg05457273 | KCNN2                   | 9.24E-05    | 0.361278925 |
| cg24642320 |                         | 9.24E-05    | 0.361245322 |
| cg12215739 | HOXD4;MIR10B            | 7.23E-05    | 0.361242072 |
| cg08182501 |                         | 3.21E-05    | 0.361234998 |
| cg14377681 | ERBB2;ERBB2             | 5.59E-05    | 0.361229432 |
| cg05201477 | ARNT2                   | 0.000117986 | 0.361225551 |
| cg27388911 | THRB;THRB;THRB          | 0.000187194 | 0.361206856 |
| cg25367558 | USP49                   | 4.34E-05    | 0.361202443 |
| cg24634420 | PDGFC                   | 0.001393182 | 0.361201486 |
| cg11948341 | DHCR24                  | 1.96E-05    | 0.361186695 |
| cg04178316 | TLX3                    | 8.60E-06    | 0.36118525  |
| cg24222995 | TRIL                    | 0.000357885 | 0.361183115 |
| cg20718350 | ASCL1                   | 0.000654035 | 0.361168779 |
| cg09123368 | VAX1;VAX1               | 1.50E-05    | 0.361158638 |
| cg16777618 |                         | 0.000117986 | 0.361158439 |
| cg01287514 |                         | 0.000117986 | 0.361156724 |
| cg20784768 | SLC35F3                 | 8.60E-06    | 0.361139303 |
| cg09086201 | TFAP2D                  | 0.000148457 | 0.36113808  |
| cg12755298 | CYP7B1                  | 0.00043997  | 0.361125461 |
| cg24087681 |                         | 0.000955793 | 0.361117014 |
| cg25017620 |                         | 0.000187194 | 0.361114882 |
| cg22752533 | SLC12A5;SLC12A5;SLC12A5 | 2.58E-05    | 0.361114249 |
| cg21635203 | SOX2;SOX2OT;SOX2        | 7.23E-05    | 0.361111868 |
| cg16708981 | ZNF677                  | 3.34E-05    | 0.361085294 |
| cg23883393 | FGF14                   | 7.23E-05    | 0.361083615 |
| cg14210726 | TMC8                    | 4.34E-05    | 0.361070257 |
| cg00539976 | IRX4                    | 2.58E-05    | 0.361069143 |
| cg02736420 | SOX21                   | 0.000955793 | 0.361058626 |
| cg10959668 |                         | 1.96E-05    | 0.361020707 |
| cg21521683 | ST8SIA1                 | 0.000357885 | 0.361010317 |
| cg11732619 | SLIT3;SLIT3             | 7.23E-05    | 0.361010141 |
| cg05996795 | MGC34034;MGC34034       | 0.000357885 | 0.36100761  |
| cg12836863 | BRCA2                   | 0.000233422 | 0.361001878 |
| cg24510700 | ENPP5                   | 1.50E-05    | 0.360992262 |
| cg17881660 | SLC22A15;SLC22A15       | 0.002304201 | 0.360991215 |
| cg12235459 |                         | 1.96E-05    | 0.360990047 |
| cg16786178 |                         | 0.000290372 | 0.360978314 |
| cg18675097 | NKAPL;NKAPL             | 8.60E-06    | 0.360974174 |
| cg17886678 | UACA                    | 5.59E-05    | 0.360965057 |
| cg00230502 | CCDC60                  | 9.24E-05    | 0.360950335 |
| cg03399905 | ANKRD34C                | 4.34E-05    | 0.360944858 |
| cg14883916 | ZNF215                  | 7.23E-05    | 0.360911728 |



|            |                                    |             |             |
|------------|------------------------------------|-------------|-------------|
| cg20403938 | HOXC10                             | 0.000537905 | 0.36089828  |
| cg17730484 | DTX3                               | 0.000233422 | 0.36089577  |
| cg24725576 |                                    | 0.000187194 | 0.360894055 |
| cg05674150 | BNC2                               | 0.000955793 | 0.360888687 |
| cg14584448 | PLA2R1;PLA2R1                      | 0.000148457 | 0.360888383 |
| cg09112081 |                                    | 0.000148457 | 0.360887932 |
| cg04786857 | SPDYA;SPDYA                        | 0.000117986 | 0.360865966 |
| cg21640587 | DSCAML1                            | 0.00041966  | 0.360862765 |
| cg05975727 | KIF5C                              | 3.34E-05    | 0.360842969 |
| cg12279419 |                                    | 8.60E-06    | 0.360830109 |
| cg26755141 | SIM1                               | 0.000148457 | 0.360829474 |
| cg09746736 | SLC6A2                             | 0.000148457 | 0.360821581 |
| cg20670923 | VAPA;VAPA                          | 0.002304201 | 0.360805213 |
| cg16987900 | PCDHA2;PCDHA1;PCDHA1;PCDHA6;PCDHA5 | 4.34E-05    | 0.360801805 |
| cg06854666 | LIMCH1;LIMCH1;LIMCH1               | 0.004131428 | 0.360789395 |
| cg00206356 |                                    | 8.60E-06    | 0.360782821 |
| cg14514569 |                                    | 1.50E-05    | 0.360777112 |
| cg20814202 | AATK                               | 0.000357885 | 0.360775561 |
| cg04602284 | C3orf15                            | 2.58E-05    | 0.360760888 |
| cg02525108 |                                    | 3.34E-05    | 0.360737592 |
| cg01882870 | MIR9-3                             | 1.96E-05    | 0.360726239 |
| cg08390877 |                                    | 0.000187194 | 0.360680898 |
| cg17838734 | TPBG;TPBG                          | 0.002714607 | 0.360680786 |
| cg03092191 | UNCX                               | 9.24E-05    | 0.360671976 |
| cg09685182 |                                    | 4.34E-05    | 0.360666274 |
| cg01423335 | GPC6                               | 0.000148457 | 0.360652839 |
| cg18546689 | TNFSF11;TNFSF11;TNFSF11            | 0.001948248 | 0.360651791 |
| cg19935471 | MATN2;MATN2                        | 1.96E-05    | 0.360647008 |
| cg23302603 | KIF1A                              | 0.000148457 | 0.360634406 |
| cg09169255 | SPR                                | 0.001376172 | 0.360628599 |
| cg24042339 | MYO5B                              | 8.60E-06    | 0.360595871 |
| cg25767345 |                                    | 4.34E-05    | 0.360590813 |
| cg14958635 | NEUROG1                            | 9.24E-05    | 0.360585429 |
| cg07895169 | TTC23L                             | 0.000117986 | 0.360580793 |
| cg01274643 |                                    | 0.000233422 | 0.360572614 |
| cg09159022 | CSMD1                              | 0.000148457 | 0.360562821 |
| cg06481122 |                                    | 9.24E-05    | 0.360560951 |
| cg19290410 | TBX5;TBX5                          | 1.50E-05    | 0.360558386 |
| cg11125805 | SLC36A3;SLC36A3                    | 0.001948248 | 0.360542042 |
| cg03572260 | STARD3;STARD3;STARD3               | 8.60E-06    | 0.360541319 |
| cg08213337 | PDE11A;PDE11A                      | 0.000537905 | 0.360540039 |
| cg21464115 | ESYT3                              | 8.60E-06    | 0.360536626 |
| cg13300301 | FUT4;FUT4                          | 0.000791389 | 0.360516446 |
| cg13817046 |                                    | 0.00043997  | 0.360514967 |
| cg21469278 | GRB14                              | 4.34E-05    | 0.360510788 |
| cg11430245 | SV2C                               | 0.000537905 | 0.360503815 |
| cg17806623 | KL                                 | 0.002266401 | 0.360479967 |
| cg14750277 |                                    | 1.96E-05    | 0.360458717 |
| cg21916108 | ZFPM2                              | 0.000148457 | 0.360457695 |
| cg25015038 |                                    | 0.000158823 | 0.360454848 |
| cg13607230 | MFSD9                              | 2.58E-05    | 0.36044309  |
| cg04978078 |                                    | 0.000187194 | 0.360433519 |
| cg23817096 |                                    | 2.58E-05    | 0.360430206 |
| cg10539861 | ENTPD7                             | 5.59E-05    | 0.360426669 |
| cg11176493 | WNT3A                              | 9.24E-05    | 0.360386266 |
| cg14898416 | PLA2R1;PLA2R1                      | 0.003189589 | 0.360385676 |
| cg06446668 | FAM155A                            | 5.59E-05    | 0.360382036 |
| cg03027179 |                                    | 1.96E-05    | 0.360359505 |
| cg13631916 | FAM162B                            | 7.23E-05    | 0.360351526 |
| cg10726475 | WWTR1;WWTR1;WWTR1                  | 7.23E-05    | 0.360330954 |

|            |                                       |             |             |
|------------|---------------------------------------|-------------|-------------|
| cg00371453 | CLEC4GP1                              | 0.000357885 | 0.36033016  |
| cg13634602 | SALL3                                 | 2.58E-05    | 0.360320198 |
| cg20488280 | GPR126;GPR126;GPR126;GPR126           | 0.000117986 | 0.360294529 |
| cg13455410 |                                       | 7.23E-05    | 0.360289824 |
| cg13962664 |                                       | 8.60E-06    | 0.360283229 |
| cg06633061 |                                       | 1.96E-05    | 0.360266998 |
| cg04059773 |                                       | 4.34E-05    | 0.360260506 |
| cg14836555 |                                       | 9.24E-05    | 0.360221013 |
| cg18650670 | IGDCC4                                | 7.23E-05    | 0.360212769 |
| cg07282889 |                                       | 7.23E-05    | 0.360194978 |
| cg00301660 |                                       | 1.11E-05    | 0.36017444  |
| cg11770663 |                                       | 0.00043997  | 0.360171206 |
| cg04011228 | RPRM;RPRM                             | 2.58E-05    | 0.360170781 |
| cg06792358 | NRSN1                                 | 3.34E-05    | 0.360164237 |
| cg22070406 | ST8SIA3                               | 3.34E-05    | 0.360160879 |
| cg04349243 | SLC16A12                              | 0.000357885 | 0.360137042 |
| cg08289140 |                                       | 0.000233422 | 0.36012726  |
| cg24794531 | TRPC1                                 | 5.59E-05    | 0.360096117 |
| cg10446179 | GJA1                                  | 1.96E-05    | 0.360092135 |
| cg07300060 |                                       | 4.34E-05    | 0.360078492 |
| cg07110659 | LPAR3                                 | 5.59E-05    | 0.360072411 |
| cg08286738 | CYP26B1                               | 0.000187194 | 0.360066241 |
| cg08053904 | GPR139                                | 0.000187194 | 0.360047059 |
| cg09009074 | LMCD1                                 | 0.000357885 | 0.360035513 |
| cg13627491 | LPPR1                                 | 0.000233422 | 0.360035324 |
| cg21189054 | NCAM1;NCAM1;NCAM1                     | 4.34E-05    | 0.360034981 |
| cg14600987 | TNNT3;TNNT3;TNNT3;TNNT3               | 0.000117986 | 0.360031473 |
| cg08832624 |                                       | 3.34E-05    | 0.360028894 |
| cg06922606 | GRIN2A;GRIN2A;GRIN2A                  | 1.11E-05    | 0.360020382 |
| cg17745697 |                                       | 0.000290372 | 0.360005839 |
| cg02920216 | CHODL                                 | 8.60E-06    | 0.359997483 |
| cg08092930 | PPFIA1;PPFIA1                         | 0.001639597 | 0.359997265 |
| cg14700304 |                                       | 0.000955793 | 0.359985965 |
| cg18161327 |                                       | 0.000187194 | 0.359971512 |
| cg12355180 | SLC30A10                              | 3.34E-05    | 0.359970887 |
| cg26956874 | RYR2                                  | 3.34E-05    | 0.359965889 |
| cg04009492 | MAL2                                  | 1.50E-05    | 0.359963102 |
| cg13935437 | AKR7L;AKR7L                           | 0.000117986 | 0.359958864 |
| cg00005619 | FAM180B                               | 1.96E-05    | 0.359924793 |
| cg02012576 |                                       | 0.000791389 | 0.359921833 |
| cg22047703 | BMP7                                  | 0.000290372 | 0.359909349 |
| cg07643225 | C10orf107                             | 5.59E-05    | 0.359905069 |
| cg06212175 | A2BP1;A2BP1;A2BP1                     | 3.34E-05    | 0.359893194 |
| cg25484990 | FOXA2;FOXA2                           | 7.23E-05    | 0.359885332 |
| cg09505788 |                                       | 7.23E-05    | 0.359882274 |
| cg24769846 |                                       | 2.58E-05    | 0.359876438 |
| cg24213719 |                                       | 0.001639597 | 0.359869363 |
| cg10498524 | PDE11A;PDE11A                         | 0.000290372 | 0.359848081 |
| cg17647904 | NCOR2;NCOR2                           | 2.58E-05    | 0.359844175 |
| cg24666702 |                                       | 0.000187194 | 0.359821186 |
| cg21233517 | ACOT4                                 | 7.23E-05    | 0.35981592  |
| cg02423064 | ACCN1                                 | 7.23E-05    | 0.359789211 |
| cg17788682 | ARNT2                                 | 0.000187194 | 0.359774511 |
| cg18646207 | VAX1;VAX1                             | 4.34E-05    | 0.359774329 |
| cg12164321 | CPXM2                                 | 2.58E-05    | 0.359765374 |
| cg11915650 | INS-IGF2;IGF2AS;IGF2;IGF2;IGF2AS;IGF2 | 0.000187194 | 0.359764382 |
| cg15381098 | AP3B2                                 | 2.58E-05    | 0.359760712 |
| cg15692992 |                                       | 4.34E-05    | 0.359755628 |
| cg20219035 | PLBD1                                 | 7.23E-05    | 0.359754602 |
| cg25366582 |                                       | 0.000537905 | 0.359748325 |

|            |                                     |             |             |
|------------|-------------------------------------|-------------|-------------|
| cg00272200 | FGF10                               | 7.23E-05    | 0.359733316 |
| cg17173498 | FLJ42875;PRDM16;PRDM16;FLJ42875     | 0.000187194 | 0.35972779  |
| cg05124441 | SYN2;SYN2;SYN2;SYN2                 | 7.23E-05    | 0.359726909 |
| cg02741229 | PCDHGA4;PCDHGA6;PCDHGA1;PCDHGA5;PC  | 1.96E-05    | 0.359720923 |
| cg03970319 | UNCX                                | 8.60E-06    | 0.359712501 |
| cg23098529 | PPAN;PPAN-P2RY11                    | 0.000187194 | 0.359689603 |
| cg27029821 | PRDM14                              | 2.58E-05    | 0.359686465 |
| cg00472277 | TSPAN32                             | 0.006823935 | 0.359674157 |
| cg19880942 | C8orf34                             | 4.34E-05    | 0.359673383 |
| cg24413662 |                                     | 5.59E-05    | 0.359672609 |
| cg21907579 | TBX5;TBX5;TBX5;TBX5                 | 2.58E-05    | 0.359665695 |
| cg04250847 | PPFIA2                              | 1.50E-05    | 0.359663372 |
| cg11717564 | RXRG;RXRG                           | 0.000290372 | 0.359658193 |
| cg05126887 | COL21A1                             | 1.50E-05    | 0.359639229 |
| cg12530503 | MIR9-3                              | 1.96E-05    | 0.359636284 |
| cg00662556 | GALR1                               | 8.60E-06    | 0.359622979 |
| cg08106973 |                                     | 0.001948248 | 0.359587545 |
| cg12782180 | LEP                                 | 4.34E-05    | 0.359579005 |
| cg21549294 |                                     | 2.58E-05    | 0.359569225 |
| cg04056343 | A2BP1;A2BP1;A2BP1                   | 4.34E-05    | 0.35954383  |
| cg22631938 | EIF4E3;EIF4E3;GPR27                 | 1.50E-05    | 0.359542152 |
| cg23906261 | GFRA1;GFRA1;GFRA1                   | 9.24E-05    | 0.359521559 |
| cg21912162 | MAP1B                               | 3.34E-05    | 0.359514319 |
| cg12043818 |                                     | 0.000187194 | 0.359509321 |
| cg10947408 |                                     | 4.34E-05    | 0.359501224 |
| cg04330449 | NEUROG1                             | 9.24E-05    | 0.359491671 |
| cg25035988 |                                     | 0.000526175 | 0.359491188 |
| cg27467803 |                                     | 0.000205664 | 0.359474368 |
| cg24394856 |                                     | 0.000357885 | 0.359441064 |
| cg11692124 |                                     | 0.002714607 | 0.359438192 |
| cg23458558 | RALYL;RALYL;RALYL;RALYL             | 1.11E-05    | 0.359437024 |
| cg20128928 | TACR3                               | 3.34E-05    | 0.359416701 |
| cg20008101 | LGALS3                              | 0.00043997  | 0.359380935 |
| cg20386487 |                                     | 0.000537905 | 0.359363331 |
| cg25105522 | MAP3K14                             | 0.00043997  | 0.359360115 |
| cg12986271 | TSHZ3                               | 0.004357816 | 0.359350866 |
| cg07892597 | TBX15;TBX15                         | 1.96E-05    | 0.359338958 |
| cg05048377 |                                     | 0.000357885 | 0.359331873 |
| cg04570735 | PDE4C;PDE4C;PDE4C                   | 0.000955793 | 0.359327831 |
| cg10056132 | C10orf53;C10orf53;C10orf53;C10orf53 | 0.000187194 | 0.359324563 |
| cg21907107 | OTP                                 | 0.000148457 | 0.359279717 |
| cg18987410 | HEPACAM                             | 0.000233422 | 0.35924454  |
| cg11385338 |                                     | 9.24E-05    | 0.359242396 |
| cg19011001 | ITPK1;ITPK1;ITPK1                   | 2.58E-05    | 0.359236473 |
| cg22930650 | CWH43                               | 0.00156564  | 0.359229247 |
| cg21088438 | SLC10A1                             | 0.000357885 | 0.359219354 |
| cg08944026 | ANKRD33B                            | 0.000537905 | 0.359212725 |
| cg15281774 | HCN4                                | 0.000233422 | 0.359209997 |
| cg21215899 | LOX                                 | 3.34E-05    | 0.35920666  |
| cg20806175 | FCER1G                              | 0.000290372 | 0.359195267 |
| cg03002352 | RAD51AP2;RAD51AP2                   | 2.58E-05    | 0.359184321 |
| cg05825420 | EMX2OS;EMX2;EMX2                    | 8.60E-06    | 0.359183195 |
| cg03759824 |                                     | 1.96E-05    | 0.35918221  |
| cg03698948 | DAAM2                               | 0.000955793 | 0.359167808 |
| cg14466269 | SLC25A21;SLC25A21;LOC100129794      | 1.11E-05    | 0.359164288 |
| cg21235151 |                                     | 0.00043997  | 0.359157256 |
| cg26262840 | C14orf102;C14orf102                 | 5.59E-05    | 0.359154    |
| cg20540566 | TTPA                                | 0.000262362 | 0.359132464 |
| cg22324022 | NRXN1;NRXN1                         | 2.58E-05    | 0.359120367 |
| cg12833465 | SFTA3                               | 0.000117986 | 0.359096969 |

|            |                                         |             |             |
|------------|-----------------------------------------|-------------|-------------|
| cg14747563 | NEUROG1                                 | 0.000148457 | 0.359071134 |
| cg23244488 |                                         | 0.001147425 | 0.359057789 |
| cg05060607 | C3AR1                                   | 0.000148457 | 0.359057142 |
| cg27027827 |                                         | 2.58E-05    | 0.359032727 |
| cg25436886 |                                         | 3.34E-05    | 0.359032701 |
| cg26508200 | SSH1;SSH1                               | 0.000357885 | 0.359015024 |
| cg22091110 |                                         | 7.23E-05    | 0.359011156 |
| cg27047406 | SLC6A2                                  | 4.34E-05    | 0.359008359 |
| cg07513791 |                                         | 0.000187194 | 0.358999848 |
| cg14012546 | INPP5D;INPP5D                           | 0.000233422 | 0.358991899 |
| cg00606739 | LOC440040                               | 1.50E-05    | 0.358974978 |
| cg08247450 | AADAT;AADAT;AADAT                       | 4.34E-05    | 0.358953073 |
| cg18349835 | VIPR2                                   | 0.003734675 | 0.358930206 |
| cg25509184 | CFTR                                    | 9.24E-05    | 0.358929623 |
| cg24396691 | SLC30A10                                | 2.58E-05    | 0.358884039 |
| cg20870512 | UNCX                                    | 0.001061731 | 0.358882339 |
| cg12057242 | CPSF3                                   | 3.34E-05    | 0.358856214 |
| cg27648946 | RHOBTB1;RHOBTB1                         | 8.60E-06    | 0.358852719 |
| cg03595533 |                                         | 2.80E-05    | 0.35884874  |
| cg08039116 | HECW1;HECW1                             | 5.59E-05    | 0.358825576 |
| cg05998607 |                                         | 3.34E-05    | 0.358825355 |
| cg10643691 |                                         | 4.34E-05    | 0.35880409  |
| cg26731008 | FAM24A                                  | 2.58E-05    | 0.358800947 |
| cg08870743 | OLIG2                                   | 0.000148457 | 0.35878222  |
| cg18569734 | NR2E1                                   | 1.96E-05    | 0.358780294 |
| cg20576393 | LMO3;LMO3                               | 8.60E-06    | 0.35877332  |
| cg11258943 | FOXE1                                   | 0.000290372 | 0.35872945  |
| cg12864721 | C10orf41;C10orf41                       | 9.24E-05    | 0.358726386 |
| cg24690231 | IGSF21                                  | 9.24E-05    | 0.358722895 |
| cg17010895 |                                         | 0.000117986 | 0.358709369 |
| cg25806701 | LRAT                                    | 0.000233422 | 0.358704482 |
| cg05036656 |                                         | 7.23E-05    | 0.35869886  |
| cg14312649 |                                         | 0.000148457 | 0.358689431 |
| cg15623175 |                                         | 1.50E-05    | 0.358665357 |
| cg06535308 | ABCC8                                   | 1.50E-05    | 0.358655341 |
| cg02745847 | IGF2BP1;IGF2BP1                         | 9.24E-05    | 0.358653352 |
| cg18934187 | STARD6                                  | 1.11E-05    | 0.358646173 |
| cg04226724 | LPHN2                                   | 0.000233422 | 0.358636117 |
| cg18687675 | GSC                                     | 0.003734675 | 0.358623842 |
| cg16973520 |                                         | 7.23E-05    | 0.358619853 |
| cg26843711 | PCDHGA4;PCDHGA6;PCDHGA1;PCDHGA5;PCDHGA2 | 5.59E-05    | 0.358616012 |
| cg14348439 | LONRF2                                  | 0.000233422 | 0.358615207 |
| cg00450784 | RFX4                                    | 2.58E-05    | 0.358612551 |
| cg15208375 | TSHZ3                                   | 0.000654035 | 0.358592792 |
| cg03160883 |                                         | 0.001639597 | 0.358592483 |
| cg19137348 |                                         | 0.000290372 | 0.358588398 |
| cg22967396 | OTX2OS1                                 | 8.60E-06    | 0.358577292 |
| cg00701692 | NKX6-2                                  | 1.50E-05    | 0.358571882 |
| cg02743222 | TLX3;TLX3                               | 0.000233422 | 0.358537847 |
| cg27138901 | CLEC2D;CLEC2D                           | 0.00043997  | 0.35852805  |
| cg11758945 |                                         | 0.000233422 | 0.358519924 |
| cg22115076 |                                         | 2.58E-05    | 0.35851642  |
| cg08920032 | IGF1R                                   | 9.24E-05    | 0.358508429 |
| cg24258699 | MSC                                     | 0.000233422 | 0.358500239 |
| cg02611848 | C2orf65                                 | 0.000233422 | 0.358482927 |
| cg01566555 |                                         | 0.000537905 | 0.358462546 |
| cg02146929 | PDE10A;PDE10A                           | 0.000187194 | 0.35843836  |
| cg02268748 |                                         | 0.000290372 | 0.3584357   |
| cg04123776 |                                         | 7.23E-05    | 0.358427326 |
| cg00564163 | STEAP4                                  | 0.000290372 | 0.358410539 |

|            |                                      |             |             |
|------------|--------------------------------------|-------------|-------------|
| cg16204509 | ALDH1L2;ALDH1L2                      | 4.34E-05    | 0.358406797 |
| cg00879003 |                                      | 1.96E-05    | 0.358387742 |
| cg10416963 | PRDM5                                | 2.58E-05    | 0.358382399 |
| cg05330360 | ZBPB2;ZBPB2                          | 3.34E-05    | 0.358377157 |
| cg02896696 | DHCR24                               | 2.58E-05    | 0.358343168 |
| cg22736850 | OVOL2                                | 7.23E-05    | 0.358327713 |
| cg23018092 | MEGF10                               | 0.002714607 | 0.358325555 |
| cg06734406 | AQP2                                 | 0.000357885 | 0.358312855 |
| cg09165842 | PCSK2                                | 0.000187194 | 0.358312714 |
| cg22884656 |                                      | 2.58E-05    | 0.358312122 |
| cg01232748 | CHIC2                                | 7.23E-05    | 0.358282281 |
| cg02819231 | FBXL2                                | 0.000290372 | 0.358267009 |
| cg26517584 | SBNO2                                | 2.58E-05    | 0.358238694 |
| cg20611911 | TP73;WDR8                            | 0.001061731 | 0.358209203 |
| cg03898631 |                                      | 1.50E-05    | 0.358207648 |
| cg02175321 | PDGFD;PDGFD                          | 4.34E-05    | 0.358196073 |
| cg05344747 | CD59;CD59;CD59;CD59                  | 0.001147425 | 0.358183194 |
| cg16053580 | KLK13                                | 0.000290372 | 0.358175173 |
| cg01926238 |                                      | 5.59E-05    | 0.358171833 |
| cg06159896 |                                      | 1.50E-05    | 0.358160559 |
| cg03371199 | OXGR1                                | 0.000148457 | 0.358145043 |
| cg11825621 | MKX                                  | 0.000148457 | 0.358141363 |
| cg04605532 |                                      | 0.000148457 | 0.358124017 |
| cg05457768 |                                      | 1.96E-05    | 0.358074911 |
| cg01777397 | CLIP4                                | 0.002304201 | 0.358065651 |
| cg01033463 | PHF21B;PHF21B                        | 0.000290372 | 0.358048091 |
| cg07416237 | CLYBL                                | 0.000233422 | 0.358047965 |
| cg04920358 |                                      | 0.000654035 | 0.358034523 |
| cg22894805 | MGA;MGA;MIR626                       | 7.23E-05    | 0.358024173 |
| cg11970349 | GPR78                                | 2.58E-05    | 0.358000789 |
| cg09235539 | DNAJC6;DNAJC6                        | 1.96E-05    | 0.357998415 |
| cg08534628 |                                      | 8.60E-06    | 0.357991222 |
| cg04898695 | CHD5                                 | 0.000537905 | 0.357988091 |
| cg20312205 | SLITRK1;SLITRK1                      | 0.000290372 | 0.357987599 |
| cg14639897 | MATN2;MATN2                          | 5.59E-05    | 0.357980946 |
| cg14834925 |                                      | 7.23E-05    | 0.357977067 |
| cg05364759 | ALPL;ALPL                            | 0.000357885 | 0.357971712 |
| cg09722742 | SPOCK3;SPOCK3;SPOCK3;SPOCK3          | 0.001639597 | 0.357962502 |
| cg11058942 |                                      | 0.000290372 | 0.357962351 |
| cg12152566 | FAM193B;FAM193B                      | 9.24E-05    | 0.357951319 |
| cg26809635 |                                      | 0.000654035 | 0.357928025 |
| cg07161721 |                                      | 4.34E-05    | 0.357924262 |
| cg07357987 | SGPP2                                | 0.000187194 | 0.357916544 |
| cg05822532 | ELN;ELN;ELN;ELN;ELN                  | 0.000365373 | 0.357906443 |
| cg00792513 |                                      | 1.50E-05    | 0.357896007 |
| cg05952572 | PDE2A;PDE2A;PDE2A;PDE2A              | 8.60E-06    | 0.357889522 |
| cg18315963 | PCDH7;PCDH7;PCDH7                    | 5.59E-05    | 0.357882695 |
| cg13995854 | ST7OT2;ST7;ST7                       | 0.000537905 | 0.357848406 |
| cg23277376 | PLA2G7;PLA2G7                        | 0.000117986 | 0.357830142 |
| cg16182986 | MARCH11                              | 4.34E-05    | 0.357822    |
| cg06851941 | FBXL2                                | 0.000187194 | 0.357818201 |
| cg24277715 |                                      | 0.001147425 | 0.357758804 |
| cg11028872 |                                      | 2.58E-05    | 0.357756261 |
| cg10615842 |                                      | 3.34E-05    | 0.357743384 |
| cg21946299 | PPARG;PPARG;PPARG                    | 9.24E-05    | 0.357733876 |
| cg04461802 | GPR126;GPR126;GPR126;GPR126;GPR126;G | 5.59E-05    | 0.357707346 |
| cg08571883 |                                      | 0.000117986 | 0.357704447 |
| cg08214808 | MAPK8IP1                             | 0.000955793 | 0.357697109 |
| cg09434193 | HBA1                                 | 0.000148457 | 0.357695645 |
| cg04425005 | ZNF827                               | 1.96E-05    | 0.35765939  |

|            |                                         |             |             |
|------------|-----------------------------------------|-------------|-------------|
| cg26052635 | CLIP4                                   | 0.006823935 | 0.357647775 |
| cg14933494 |                                         | 4.34E-05    | 0.357630377 |
| cg22320365 | SRCIN1                                  | 0.000117986 | 0.357624659 |
| cg24433287 | MANEAL;MANEAL;MANEAL                    | 7.23E-05    | 0.357604161 |
| cg26153410 |                                         | 0.000117986 | 0.357601084 |
| cg14993491 | PCSK9                                   | 1.50E-05    | 0.357584588 |
| cg19016332 | NPHS2                                   | 1.11E-05    | 0.357583996 |
| cg00336320 | PNPLA1;PNPLA1;PNPLA1                    | 7.23E-05    | 0.357581603 |
| cg15907944 |                                         | 9.24E-05    | 0.357548352 |
| cg10135260 |                                         | 0.000357885 | 0.357546149 |
| cg13802457 | GLIS3                                   | 1.11E-05    | 0.357533421 |
| cg01764020 | TRPC4;TRPC4;TRPC4;TRPC4;TRPC4;TRPC4     | 0.000117986 | 0.357508919 |
| cg01363714 |                                         | 0.000233422 | 0.357508096 |
| cg13303534 |                                         | 1.96E-05    | 0.357495178 |
| cg07877559 | CTNND2                                  | 0.000148457 | 0.357480531 |
| cg19075787 |                                         | 5.59E-05    | 0.357461677 |
| cg19384905 | FBXO5;FBXO5                             | 0.001639597 | 0.357459005 |
| cg13927387 | YAP1;YAP1                               | 0.000233422 | 0.3574577   |
| cg03259243 |                                         | 1.50E-05    | 0.35745538  |
| cg27111678 | CHST8;CHST8;CHST8                       | 2.58E-05    | 0.357448048 |
| cg05666120 | EGR4                                    | 0.000233422 | 0.357446487 |
| cg07467520 | ROBO1;ROBO1;ROBO1;ROBO1;ROBO1;ROBO1     | 5.59E-05    | 0.357444392 |
| cg06580371 | PKIB;PKIB;PKIB                          | 0.000148457 | 0.357433788 |
| cg15885337 | OPCML;OPCML                             | 0.000654035 | 0.357422038 |
| cg00653387 | PTN;PTN                                 | 1.11E-05    | 0.357416983 |
| cg11014124 | PCDHGA4;PCDHGA6;PCDHGA1;PCDHGA8;PCDHGA8 | 0.00043997  | 0.35741452  |
| cg17974780 | CLDN3                                   | 0.000117986 | 0.357414376 |
| cg02969141 | MEOX2                                   | 0.004357816 | 0.357378106 |
| cg26029736 |                                         | 0.000187194 | 0.357376745 |
| cg20762480 |                                         | 8.60E-06    | 0.357335127 |
| cg02356551 |                                         | 0.002714607 | 0.357330026 |
| cg20183802 | PIP4K2C;PIP4K2C;PIP4K2C;PIP4K2C         | 9.24E-05    | 0.357326067 |
| cg05049361 | GALNTL1;GALNTL1                         | 0.001147425 | 0.357323402 |
| cg23906060 | ANKRD34C                                | 1.50E-05    | 0.357292054 |
| cg12353688 |                                         | 0.000290372 | 0.357291347 |
| cg16857801 | LOC440040                               | 2.58E-05    | 0.357265544 |
| cg25842285 | CNNM1                                   | 0.000187194 | 0.357260604 |
| cg07831417 |                                         | 1.50E-05    | 0.357259248 |
| cg04748988 | PPARG;PPARG;PPARG                       | 0.000791389 | 0.357249535 |
| cg20269359 | C21orf88;C21orf88                       | 4.34E-05    | 0.357213015 |
| cg18806378 |                                         | 4.34E-05    | 0.357201333 |
| cg12539415 | HOXD4;HOXD4                             | 0.000117986 | 0.357190171 |
| cg18729308 | AADAT;AADAT                             | 3.34E-05    | 0.357164756 |
| cg13732582 | KLB                                     | 0.009066563 | 0.357162616 |
| cg03237606 | TMEM26                                  | 3.34E-05    | 0.357133441 |
| cg24042242 | C1QL1                                   | 0.000474381 | 0.357132483 |
| cg02243785 | LPHN2                                   | 0.000187194 | 0.357128375 |
| cg18804985 | CXCL2                                   | 0.000654035 | 0.357123162 |
| cg18788994 |                                         | 5.59E-05    | 0.357119933 |
| cg12581627 | PCDH20                                  | 5.59E-05    | 0.357118439 |
| cg05630016 | IGLON5                                  | 4.34E-05    | 0.357109848 |
| cg24427504 |                                         | 0.001147425 | 0.357107485 |
| cg21135135 | WBSCR17                                 | 0.000233422 | 0.357074638 |
| cg15775921 | PAX3;PAX3;PAX3;PAX3;PAX3;PAX3           | 1.50E-05    | 0.357070579 |
| cg00459623 |                                         | 0.000233422 | 0.357067471 |
| cg16341836 | STAMBPL1                                | 0.000290372 | 0.357060455 |
| cg02508651 |                                         | 0.000117986 | 0.357059236 |
| cg16512661 |                                         | 0.000117986 | 0.357042518 |
| cg14472366 |                                         | 0.001639597 | 0.357037851 |
| cg21501724 | PAK7;PAK7                               | 2.58E-05    | 0.357037232 |

|            |                                      |             |             |
|------------|--------------------------------------|-------------|-------------|
| cg07988820 | PPFIA2                               | 2.58E-05    | 0.357035818 |
| cg09555736 | RAB11FIP3                            | 2.58E-05    | 0.357026321 |
| cg14399851 | HLF;HLF                              | 0.000117986 | 0.35701849  |
| cg16954385 |                                      | 0.000654035 | 0.357008315 |
| cg22376706 | PTPRR                                | 7.23E-05    | 0.357007295 |
| cg25174591 | DNAH9                                | 8.60E-06    | 0.35700157  |
| cg02570079 |                                      | 3.34E-05    | 0.356995644 |
| cg08927145 |                                      | 0.000233422 | 0.356982183 |
| cg25732028 |                                      | 1.50E-05    | 0.356969338 |
| cg06492708 | SASH1                                | 1.50E-05    | 0.356968736 |
| cg18483908 |                                      | 0.000654035 | 0.356948968 |
| cg02840025 |                                      | 1.96E-05    | 0.35694821  |
| cg14611767 |                                      | 4.34E-05    | 0.356941187 |
| cg10129391 |                                      | 0.00043997  | 0.356924885 |
| cg23422268 |                                      | 4.34E-05    | 0.356924501 |
| cg01634458 |                                      | 5.59E-05    | 0.356904185 |
| cg24924936 | PTGFR;PTGFR                          | 0.000148457 | 0.356900958 |
| cg14628914 | TTRAP                                | 2.58E-05    | 0.356893268 |
| cg26074603 | KCNC2;KCNC2;KCNC2;KCNC2;KCNC2;KCNC2  | 0.000791389 | 0.356892603 |
| cg14803765 | CREB5;CREB5                          | 0.001147425 | 0.356892551 |
| cg07008213 | WWC2;C4orf38                         | 4.34E-05    | 0.356824654 |
| cg08887961 | RHOBTB1;RHOBTB1                      | 1.50E-05    | 0.356814459 |
| cg25689193 |                                      | 9.24E-05    | 0.356813048 |
| cg04131583 |                                      | 0.000148457 | 0.356792455 |
| cg12602409 |                                      | 0.005897668 | 0.356784194 |
| cg05875410 |                                      | 0.000187194 | 0.356783377 |
| cg16034881 | LRRC49;THAP10                        | 1.11E-05    | 0.356783061 |
| cg26577201 | CRYBA2;CRYBA2;CRYBA2                 | 0.000654035 | 0.356745828 |
| cg20740029 | SLC5A8;SLC5A8                        | 1.50E-05    | 0.356745014 |
| cg16524928 | NKX2-2                               | 1.11E-05    | 0.356738937 |
| cg24305584 | SLC16A12                             | 0.000537905 | 0.356734382 |
| cg08522426 |                                      | 4.34E-05    | 0.356733985 |
| cg20541456 | CYFIP2;CYFIP2;CYFIP2;CYFIP2          | 0.002304201 | 0.356730688 |
| cg00829961 |                                      | 0.000233422 | 0.35672443  |
| cg20000718 |                                      | 0.000117986 | 0.356673028 |
| cg02106941 | NEFM;NEFM                            | 9.24E-05    | 0.356665928 |
| cg18780257 | FGF12;FGF12;FGF12                    | 0.000187194 | 0.356656765 |
| cg15183083 | KCNA4;KCNA4                          | 1.50E-05    | 0.356644812 |
| cg18876990 | NGDN;NGDN                            | 0.003189589 | 0.356624573 |
| cg21540621 |                                      | 7.23E-05    | 0.356624136 |
| cg05471523 |                                      | 0.000955793 | 0.356609669 |
| cg04166042 |                                      | 0.000148457 | 0.356605514 |
| cg04880091 |                                      | 8.60E-06    | 0.356580312 |
| cg17338208 | TFPI2;TFPI2                          | 0.000233422 | 0.356552247 |
| cg24340081 | NKAIN3                               | 0.000537905 | 0.356545177 |
| cg01162672 | EYA4;EYA4;EYA4                       | 0.00043997  | 0.356524684 |
| cg01047555 | C6orf174                             | 0.001948248 | 0.356521125 |
| cg02246609 |                                      | 9.24E-05    | 0.356520361 |
| cg15343119 | GALR1                                | 2.58E-05    | 0.356510472 |
| cg04134305 | C7orf13;RNF32                        | 0.00041966  | 0.356508074 |
| cg00830817 | C11orf87                             | 4.34E-05    | 0.35649332  |
| cg18172877 | IRX4                                 | 5.59E-05    | 0.356479587 |
| cg03287340 |                                      | 0.000290372 | 0.35647147  |
| cg26950557 | EGFLAM                               | 0.000233422 | 0.356471244 |
| cg05172912 | MOGAT1                               | 0.000233422 | 0.356464079 |
| cg22059733 | MAPK4                                | 0.000537905 | 0.356452461 |
| cg06279276 | B3GNT9                               | 0.000791389 | 0.356447528 |
| cg14183540 | OSBPL5;OSBPL5;OSBPL5                 | 9.24E-05    | 0.356445679 |
| cg24990212 | CYP7B1                               | 2.58E-05    | 0.356427657 |
| cg00586644 | CHAT;CHAT;CHAT;CHAT;CHAT;CHAT;CHAT;C | 5.59E-05    | 0.356407145 |

|            |                                     |             |             |
|------------|-------------------------------------|-------------|-------------|
| cg09971646 | DLK1                                | 4.34E-05    | 0.356400423 |
| cg13088432 | TNKS                                | 0.000148457 | 0.356392725 |
| cg17931661 | GULP1                               | 8.60E-06    | 0.356387473 |
| cg13294849 | SOX2OT                              | 0.003486652 | 0.356365866 |
| cg06233376 | A2BP1;A2BP1                         | 1.11E-05    | 0.356346446 |
| cg03760839 | TBX15                               | 3.34E-05    | 0.356341033 |
| cg01937793 | FAM189A2                            | 2.58E-05    | 0.356308537 |
| cg12113984 |                                     | 9.24E-05    | 0.356306666 |
| cg00498604 | TLL1                                | 3.34E-05    | 0.356301758 |
| cg25056460 | PPAPDC1A                            | 0.000955793 | 0.356277723 |
| cg00032805 | MARCH1                              | 8.60E-06    | 0.356271288 |
| cg25006077 | MBNL1;MBNL1;MBNL1;MBNL1;MBNL1;MBNL1 | 2.58E-05    | 0.356265377 |
| cg19426522 |                                     | 0.000233422 | 0.35626512  |
| cg06983174 | XKR4                                | 0.001147425 | 0.356264552 |
| cg13679804 |                                     | 0.006823935 | 0.356246031 |
| cg19111459 |                                     | 1.96E-05    | 0.356235408 |
| cg00355992 | ZNF214;NLRP14;ZNF214                | 1.96E-05    | 0.35622988  |
| cg16530437 |                                     | 0.00043997  | 0.356224356 |
| cg17004208 | MPPED2                              | 0.000357885 | 0.356220877 |
| cg08431704 | LOX                                 | 5.59E-05    | 0.356220125 |
| cg22830707 | HOXC13                              | 1.11E-05    | 0.356217652 |
| cg18358020 |                                     | 7.23E-05    | 0.356198538 |
| cg00488829 |                                     | 2.58E-05    | 0.356194528 |
| cg20287234 | GPR55                               | 4.34E-05    | 0.356187242 |
| cg02128244 |                                     | 1.50E-05    | 0.356181243 |
| cg11621911 | NALCN                               | 0.001147425 | 0.356179427 |
| cg19317413 | LMX1A                               | 3.34E-05    | 0.356178631 |
| cg16910251 |                                     | 9.24E-05    | 0.356176112 |
| cg23584144 | DACT2                               | 3.34E-05    | 0.356122238 |
| cg09416188 | DAG1;DAG1                           | 1.96E-05    | 0.356120451 |
| cg13912545 | EYA4;EYA4;EYA4                      | 0.000148457 | 0.356109627 |
| cg08917174 | MARCH4;MARCH4                       | 0.000117986 | 0.356108358 |
| cg16581884 | PGR;PGR                             | 4.34E-05    | 0.356107531 |
| cg26509715 | EN1                                 | 0.000117986 | 0.356089792 |
| cg00434010 | SIM1                                | 7.23E-05    | 0.356072102 |
| cg25250358 | PLOD2;PLOD2;PLOD2;PLOD2             | 1.50E-05    | 0.356071311 |
| cg01498832 | RPTOR;RPTOR                         | 2.58E-05    | 0.356058432 |
| cg08146323 | ZNF835                              | 4.34E-05    | 0.356049384 |
| cg20792735 | CTNNA2;LRRTM1;LRRTM1;CTNNA2         | 1.50E-05    | 0.356049098 |
| cg21849844 |                                     | 0.00043997  | 0.356041076 |
| cg12510708 | NFE2L3                              | 0.002714607 | 0.356024284 |
| cg23986620 |                                     | 7.23E-05    | 0.356023386 |
| cg21320567 | CSPP1;CSPP1;COPS5                   | 7.23E-05    | 0.356020646 |
| cg13409248 | ENTPD3                              | 0.000117986 | 0.356015215 |
| cg16326242 |                                     | 4.34E-05    | 0.356001739 |
| cg01530101 | KCNQ1DN                             | 0.000148457 | 0.355998728 |
| cg19942083 |                                     | 0.000148457 | 0.355993108 |
| cg09681089 |                                     | 0.00043997  | 0.355983367 |
| cg05996052 | C8orf85;C8orf85                     | 2.58E-05    | 0.355983265 |
| cg18977541 |                                     | 7.23E-05    | 0.355978201 |
| cg14426525 | SMPDL3A                             | 0.000654035 | 0.355975614 |
| cg24011260 | DPP6;DPP6                           | 4.34E-05    | 0.355971227 |
| cg00008036 | FAM163A                             | 1.11E-05    | 0.355963356 |
| cg06873316 | NELL1;NELL1                         | 0.000955793 | 0.355962283 |
| cg07465627 | STXBP4                              | 0.000233422 | 0.355957707 |
| cg05673882 | POLK                                | 0.000117986 | 0.355951975 |
| cg21300373 | MARCH1                              | 0.000233422 | 0.355939126 |
| cg09523275 | NKAPL                               | 0.000148457 | 0.355924395 |
| cg22386583 | RPTOR;RPTOR                         | 5.59E-05    | 0.355898214 |
| cg04092800 | PTGER4                              | 0.004357816 | 0.355870667 |



|            |                               |             |             |
|------------|-------------------------------|-------------|-------------|
| cg25464921 |                               | 0.000654035 | 0.355838123 |
| cg04776597 |                               | 2.58E-05    | 0.355824961 |
| cg26986937 | ETV1;ETV1;ETV1;ETV1;ETV1;ETV1 | 0.000187194 | 0.35582257  |
| cg21865845 | ROBO1                         | 0.000117986 | 0.355813654 |
| cg16292768 | CLU;CLU;CLU                   | 5.59E-05    | 0.355813572 |
| cg01893322 |                               | 7.23E-05    | 0.355806679 |
| cg01074767 | C1RL;LOC283314                | 0.000233422 | 0.355800932 |
| cg05438320 | FAM123A;FAM123A               | 0.000117986 | 0.355798543 |
| cg06992688 | OTUB2                         | 5.59E-05    | 0.355785606 |
| cg01166145 |                               | 0.00156564  | 0.355765193 |
| cg08386692 | SHISA2                        | 0.000290372 | 0.355755115 |
| cg15699693 | MYOZ3;MYOZ3                   | 0.000187194 | 0.35575441  |
| cg13783152 | SH3GL2;SH3GL2                 | 7.23E-05    | 0.355734666 |
| cg05250458 | ZNF177                        | 1.11E-05    | 0.355733048 |
| cg13366774 | C12orf59                      | 0.000290372 | 0.355699564 |
| cg05324194 |                               | 1.50E-05    | 0.355692575 |
| cg14663914 | AZU1                          | 0.00043997  | 0.35569155  |
| cg10887021 | PCDHB2                        | 0.000117986 | 0.355688288 |
| cg09141662 | TDH                           | 3.34E-05    | 0.355684625 |
| cg10050661 | KRT222                        | 3.34E-05    | 0.355674202 |
| cg16219810 | FRMD5;FRMD5                   | 4.34E-05    | 0.355665903 |
| cg26718433 | CXCL12;CXCL12;CXCL12          | 0.002714607 | 0.355653346 |
| cg00654888 | EN1                           | 8.60E-06    | 0.355624884 |
| cg02368812 | NQO2                          | 1.11E-05    | 0.355614226 |
| cg04839289 | JPH4;JPH4                     | 3.34E-05    | 0.355611631 |
| cg13736376 | PITX2;PITX2;PITX2             | 1.50E-05    | 0.355601816 |
| cg11118962 |                               | 7.23E-05    | 0.35560176  |
| cg04421973 | ADAMTS9                       | 3.34E-05    | 0.355591116 |
| cg26246127 |                               | 5.59E-05    | 0.355580951 |
| cg01715248 |                               | 0.000187194 | 0.355575062 |
| cg06578434 | SBNO2                         | 1.96E-05    | 0.355565741 |
| cg27367615 |                               | 0.000117986 | 0.355563548 |
| cg21514612 |                               | 1.96E-05    | 0.355541892 |
| cg26395694 | ITPR1;ITPR1;ITPR1             | 0.001147425 | 0.355517259 |
| cg16175599 |                               | 2.58E-05    | 0.355506743 |
| cg16674484 | NDST1                         | 0.00043997  | 0.355499443 |
| cg26390889 | RXFP3                         | 2.58E-05    | 0.35549271  |
| cg18187581 |                               | 5.59E-05    | 0.355469667 |
| cg19867917 | COLEC11;COLEC11               | 9.24E-05    | 0.355462372 |
| cg01031441 | C12orf56;C12orf56             | 0.000654035 | 0.355451367 |
| cg08754967 | DIP2C                         | 0.001639597 | 0.355419791 |
| cg01361499 |                               | 0.001948248 | 0.355418631 |
| cg16584393 | ANKRD30B                      | 0.004357816 | 0.355407809 |
| cg11075230 | MGC70857;KIAA1688             | 8.60E-06    | 0.355393704 |
| cg14937343 |                               | 5.59E-05    | 0.355393698 |
| cg01176516 | ZNF727                        | 0.001376172 | 0.355388896 |
| cg01281157 | GRM6                          | 0.000290372 | 0.35536812  |
| cg13398192 | FAM155A                       | 1.50E-05    | 0.355367742 |
| cg04510788 | GRIK3                         | 0.000791389 | 0.355367563 |
| cg18213472 | SNAP91;SNAP91                 | 0.003189589 | 0.355366692 |
| cg21530453 | LOC283856;GNAO1;GNAO1         | 0.000148457 | 0.355362956 |
| cg17717259 |                               | 0.000654035 | 0.355362599 |
| cg23372684 | COL23A1                       | 9.24E-05    | 0.355340253 |
| cg05396897 | NLRP3;NLRP3;NLRP3;NLRP3;NLRP3 | 0.000357885 | 0.355322536 |
| cg15248035 | CCIN                          | 4.34E-05    | 0.355292498 |
| cg02363526 | KCNH2;KCNH2                   | 1.50E-05    | 0.355287481 |
| cg21002528 | CRY2;CRY2                     | 5.59E-05    | 0.355282129 |
| cg08965888 |                               | 3.34E-05    | 0.355279297 |
| cg11694519 | CRYAB;HSPB2                   | 0.000654035 | 0.35527861  |
| cg26132084 | CXCL3                         | 0.000290372 | 0.355265194 |

|            |                                      |             |             |
|------------|--------------------------------------|-------------|-------------|
| cg08673054 | PDE4A;PDE4A;PDE4A                    | 0.00043997  | 0.355263913 |
| cg10537555 | CHD5                                 | 0.000187194 | 0.355227999 |
| cg06816235 | BDNF;BDNF;BDNF;BDNF;BDNF;BDNF;BDNF;E | 7.23E-05    | 0.355216716 |
| cg08109815 | NMBR;NMBR                            | 3.34E-05    | 0.355213348 |
| cg07691897 |                                      | 3.34E-05    | 0.355212512 |
| cg21963643 | CACNA1E                              | 0.00043997  | 0.355202432 |
| cg17133183 | CRABP1                               | 0.000148457 | 0.355196176 |
| cg04353095 | SPSB4                                | 0.000654035 | 0.355166757 |
| cg17971936 | AP3B2                                | 5.59E-05    | 0.355141939 |
| cg07852825 | GHSR;GHSR                            | 1.50E-05    | 0.355137349 |
| cg22549558 | SEMA5A                               | 0.003486652 | 0.355120918 |
| cg03043296 | AP3B2                                | 0.000117986 | 0.355119077 |
| cg10659886 | ZSCAN18;ZSCAN18                      | 3.34E-05    | 0.355115394 |
| cg22176895 | PROX1;PROX1                          | 0.000233422 | 0.355111883 |
| cg09163720 | INPP5A                               | 0.000357885 | 0.355109996 |
| cg06214770 | MIR375                               | 3.34E-05    | 0.355109041 |
| cg04988098 | GRID1                                | 0.000233422 | 0.355103715 |
| cg02664349 | FAM38B                               | 3.34E-05    | 0.355102909 |
| cg10530169 | DNAH12;DNAH12;DNAH12;DNAH12          | 1.96E-05    | 0.355098094 |
| cg27313642 | MIR124-2                             | 8.60E-06    | 0.355096506 |
| cg23302989 | C7orf31                              | 0.000187194 | 0.355095294 |
| cg12457238 |                                      | 7.23E-05    | 0.35509036  |
| cg15611413 | HOXC13                               | 0.000233422 | 0.355081601 |
| cg13786801 | TACSTD2                              | 8.60E-06    | 0.355079499 |
| cg18210226 | CLVS2;CLVS2                          | 7.23E-05    | 0.355068611 |
| cg07303912 | LRRN4                                | 0.000187194 | 0.355066566 |
| cg24995657 | PLEK2                                | 0.000654035 | 0.355038004 |
| cg17394649 | HCG4                                 | 0.000791389 | 0.35503722  |
| cg08455099 |                                      | 0.000187194 | 0.355030123 |
| cg22130262 | MOS                                  | 3.34E-05    | 0.355018912 |
| cg24267699 | ABO                                  | 2.58E-05    | 0.355003195 |
| cg15146720 | GALNT11                              | 4.34E-05    | 0.355000388 |
| cg17660384 | C11orf70                             | 0.000148457 | 0.354987199 |
| cg13031611 |                                      | 5.59E-05    | 0.354981121 |
| cg03905413 |                                      | 7.23E-05    | 0.354957412 |
| cg00476317 | DLC1;DLC1                            | 7.23E-05    | 0.354956656 |
| cg08550523 |                                      | 0.001639597 | 0.35495102  |
| cg13331200 | CADM2;CADM2;CADM2;CADM2              | 5.59E-05    | 0.35493771  |
| cg19930288 | WWC2;C4orf38                         | 1.50E-05    | 0.354887687 |
| cg24347838 | CCDC39                               | 9.24E-05    | 0.354868125 |
| cg15818671 |                                      | 0.000537905 | 0.354864262 |
| cg03080985 | SH3BGRL2                             | 1.96E-05    | 0.354813442 |
| cg07105285 | MTNR1B                               | 8.60E-06    | 0.354813285 |
| cg24757160 | NDUFS8                               | 1.11E-05    | 0.354803401 |
| cg01663016 | SLIT3;SLIT3                          | 8.60E-06    | 0.35479549  |
| cg12828656 | FSTL4                                | 0.000187194 | 0.354794773 |
| cg08245317 |                                      | 4.34E-05    | 0.354793665 |
| cg20332645 |                                      | 5.59E-05    | 0.354790164 |
| cg13722619 | CDCP1;CDCP1                          | 9.24E-05    | 0.354784043 |
| cg12165782 |                                      | 0.000187194 | 0.354771478 |
| cg11120913 | C3orf14                              | 7.23E-05    | 0.354760422 |
| cg02276807 |                                      | 0.001948248 | 0.354752283 |
| cg20482698 | ACTN2                                | 0.000233422 | 0.354739303 |
| cg09586924 | ST14                                 | 0.000537905 | 0.354736505 |
| cg03835609 | PCDHGA4;PCDHGA6;PCDHGA1;PCDHGA5;PC   | 5.59E-05    | 0.354733533 |
| cg12804278 | C10orf67                             | 0.001147425 | 0.354733479 |
| cg00569447 |                                      | 1.11E-05    | 0.354732739 |
| cg14255256 | FAM110C                              | 0.003189589 | 0.354712437 |
| cg14625175 | HOXA10;HOXA10                        | 0.000654035 | 0.35466987  |
| cg06504526 | SIM1                                 | 0.000357885 | 0.354668091 |

|            |                         |             |             |
|------------|-------------------------|-------------|-------------|
| cg03441409 | STEAP2;STEAP2           | 3.34E-05    | 0.354663681 |
| cg14158073 |                         | 0.000537905 | 0.354660209 |
| cg27067781 | PRRT1                   | 1.96E-05    | 0.354633192 |
| cg00065935 | STXBP5L;STXBP5L         | 0.000233422 | 0.354593508 |
| cg01687680 | CBLN1                   | 0.000233422 | 0.354589168 |
| cg26747293 | EGFLAM;EGFLAM           | 0.000537905 | 0.35457381  |
| cg03032098 | TUSC3;TUSC3;TUSC3;TUSC3 | 0.009066563 | 0.35456404  |
| cg16167240 | BSX                     | 2.58E-05    | 0.354556722 |
| cg03424342 | FSTL1;FSTL1             | 0.000290372 | 0.354551539 |
| cg22459630 | LBXCOR1                 | 0.000148457 | 0.354540507 |
| cg26878949 | PTCH1;PTCH1             | 8.60E-06    | 0.354531609 |
| cg13449295 | HIST3H2A                | 7.23E-05    | 0.354514155 |
| cg21391741 | MMEL1                   | 1.96E-05    | 0.35450967  |
| cg10857167 |                         | 1.96E-05    | 0.354507814 |
| cg10502121 |                         | 1.50E-05    | 0.354488007 |
| cg03363161 |                         | 9.24E-05    | 0.354470612 |
| cg05310486 |                         | 9.24E-05    | 0.354447182 |
| cg01697902 | CTSG                    | 0.000117986 | 0.354435032 |
| cg01599167 |                         | 0.000187194 | 0.354424398 |
| cg05337137 |                         | 8.60E-06    | 0.354415276 |
| cg09072859 | OPCML                   | 9.24E-05    | 0.354407356 |
| cg04761722 | GRIN2A;GRIN2A;GRIN2A    | 1.11E-05    | 0.354405242 |
| cg00820718 | C1QL2                   | 1.50E-05    | 0.354357596 |
| cg02229993 | FAM78B                  | 0.000117986 | 0.354347003 |
| cg19981568 | SIX6                    | 9.24E-05    | 0.354315878 |
| cg18617589 | CA8                     | 0.00043997  | 0.354306998 |
| cg05815255 | CBLN1                   | 0.000233422 | 0.354286877 |
| cg18086761 | TDRKH;TDRKH;TDRKH;TDRKH | 0.000791389 | 0.354285026 |
| cg04958236 |                         | 1.50E-05    | 0.354283751 |
| cg14056357 | ZNF229                  | 0.000526175 | 0.354283097 |
| cg18207741 |                         | 0.000955793 | 0.354253108 |
| cg13661740 |                         | 0.000290372 | 0.354239979 |
| cg17446739 | AIFM2                   | 0.001376172 | 0.354236441 |
| cg03654433 |                         | 9.24E-05    | 0.354226388 |
| cg09596234 | LMO3;LMO3               | 3.34E-05    | 0.354222076 |
| cg11787160 | DTX1                    | 0.000117986 | 0.354201779 |
| cg27207796 | FAM184B                 | 0.000290372 | 0.354201415 |
| cg06441668 | PCSK2                   | 1.50E-05    | 0.354198632 |
| cg16590190 | PDPN;PDPN               | 7.23E-05    | 0.354189864 |
| cg19975346 | FAM53B                  | 7.23E-05    | 0.354184988 |
| cg01051310 | WNT3A                   | 0.000148457 | 0.354164958 |
| cg15145341 | LOC646405               | 9.24E-05    | 0.354164268 |
| cg27314569 | BSX                     | 9.24E-05    | 0.354157289 |
| cg13610014 |                         | 1.50E-05    | 0.354154177 |
| cg00660167 |                         | 5.59E-05    | 0.354148245 |
| cg24061141 | TBX20;TBX20             | 7.23E-05    | 0.354122813 |
| cg27541691 | TUBG2                   | 0.000791389 | 0.354122618 |
| cg13878010 | ADCY5                   | 5.59E-05    | 0.354114805 |
| cg19103169 |                         | 2.58E-05    | 0.354107544 |
| cg22720041 | ZNF229                  | 0.000290372 | 0.354085851 |
| cg08975720 | FAM83H                  | 0.000148457 | 0.354082582 |
| cg26751356 |                         | 0.001639597 | 0.354081712 |
| cg13778723 | PRTG                    | 5.59E-05    | 0.354065947 |
| cg22074950 | FAM47E                  | 5.59E-05    | 0.354062872 |
| cg01040749 | INPP5A                  | 0.000233422 | 0.354059456 |
| cg02954056 |                         | 4.34E-05    | 0.354048517 |
| cg23242898 | DCC                     | 3.34E-05    | 0.35403655  |
| cg17265829 | FAT4                    | 0.000537905 | 0.35403367  |
| cg01610488 | TRPA1                   | 1.96E-05    | 0.354021118 |
| cg03080142 |                         | 2.80E-05    | 0.353996883 |

|            |                                         |             |             |
|------------|-----------------------------------------|-------------|-------------|
| cg16562275 |                                         | 0.002304201 | 0.353973264 |
| cg02548238 | LOX                                     | 8.60E-06    | 0.353972227 |
| cg20956594 |                                         | 0.001639597 | 0.353964125 |
| cg12691572 | VT11A                                   | 0.000654035 | 0.35395857  |
| cg20271517 | NPY2R;NPY2R                             | 7.23E-05    | 0.353952178 |
| cg26828017 |                                         | 0.000791389 | 0.353946617 |
| cg21538208 | MSX1                                    | 0.001948248 | 0.353916446 |
| cg01513392 |                                         | 9.24E-05    | 0.35391636  |
| cg05371552 | VIPR2                                   | 8.60E-06    | 0.353916356 |
| cg12653917 |                                         | 0.000233422 | 0.353915055 |
| cg11435506 | PON3                                    | 0.000955793 | 0.353871134 |
| cg06008480 | TTC12                                   | 1.96E-05    | 0.35387113  |
| cg04548856 | OTX2OS1                                 | 0.001147425 | 0.353869012 |
| cg24109612 | ID4                                     | 0.000233422 | 0.353868234 |
| cg21070161 | TMEM132E                                | 1.11E-05    | 0.353866816 |
| cg00750523 | RGS7BP                                  | 1.11E-05    | 0.353858934 |
| cg24944109 | SLC1A2                                  | 4.34E-05    | 0.35382559  |
| cg09595202 |                                         | 0.000357885 | 0.353820276 |
| cg15798385 | EVX1                                    | 0.000233422 | 0.353800938 |
| cg21946824 | NLGN1                                   | 0.000187194 | 0.353766804 |
| cg08167951 | PON3                                    | 9.24E-05    | 0.353763106 |
| cg26541218 | PKD1L1                                  | 0.000654035 | 0.353750795 |
| cg10051615 | C4orf38;WWC2                            | 0.000117986 | 0.353744682 |
| cg05688651 |                                         | 0.000955793 | 0.353740247 |
| cg13491584 | FOXI3                                   | 5.59E-05    | 0.353730778 |
| cg05492442 | MAPK4                                   | 8.60E-06    | 0.353716915 |
| cg03181524 | RYR1;RYR1                               | 5.59E-05    | 0.353686393 |
| cg12085977 |                                         | 5.59E-05    | 0.353684782 |
| cg16778156 |                                         | 8.60E-06    | 0.353671241 |
| cg05382097 | JAKMIP1;JAKMIP1                         | 8.60E-06    | 0.353655479 |
| cg06603113 | INSM2;INSM2                             | 0.000187194 | 0.35364718  |
| cg01271812 | MEIS1                                   | 5.59E-05    | 0.353625682 |
| cg17771605 | LOC283392;TRHDE;LOC283392               | 0.000187194 | 0.353624592 |
| cg26026615 |                                         | 1.11E-05    | 0.353615528 |
| cg05878337 | CTNND2                                  | 5.59E-05    | 0.353608413 |
| cg07568194 | ADAMTS18;ADAMTS18                       | 3.34E-05    | 0.353597581 |
| cg00455439 | FAM13C;FAM13C;FAM13C;FAM13C;FAM13C      | 7.23E-05    | 0.353593241 |
| cg25444208 | SOX2OT;SOX2                             | 0.000117986 | 0.353578051 |
| cg07883457 |                                         | 1.11E-05    | 0.353577444 |
| cg18013519 | PPP2R2C;PPP2R2C                         | 0.000187194 | 0.353576443 |
| cg23428738 |                                         | 4.34E-05    | 0.353570255 |
| cg09232478 |                                         | 0.000187194 | 0.353560646 |
| cg02372145 |                                         | 8.60E-06    | 0.353541757 |
| cg02262056 |                                         | 0.000233422 | 0.353535861 |
| cg04969688 | TJP1;TJP1                               | 1.96E-05    | 0.353517838 |
| cg08668316 |                                         | 7.23E-05    | 0.35350674  |
| cg05505872 | NR2F2;NR2F2                             | 0.000233422 | 0.353506292 |
| cg15825027 |                                         | 1.96E-05    | 0.353490422 |
| cg04514644 | CHST8;CHST8                             | 1.96E-05    | 0.353487403 |
| cg18058747 | BHMT                                    | 0.000117986 | 0.353485737 |
| cg06857614 | MOGAT1                                  | 7.23E-05    | 0.353474812 |
| cg22856324 | CYP26B1                                 | 0.001639597 | 0.353470996 |
| cg02838178 | LAD1;LAD1                               | 4.34E-05    | 0.353466748 |
| cg24833739 |                                         | 1.96E-05    | 0.353464235 |
| cg08501426 |                                         | 0.00043997  | 0.353461877 |
| cg23754772 | CIDEA;CIDEA                             | 0.000148457 | 0.353458804 |
| cg25833672 |                                         | 9.24E-05    | 0.353422902 |
| cg23930711 | PCDHGA4;PCDHGA4;PCDHGA2;PCDHGA1;PCDHGA1 | 5.59E-05    | 0.353421357 |
| cg01444716 | BTBD3;BTBD3                             | 0.000791389 | 0.353417391 |
| cg16259229 |                                         | 9.24E-05    | 0.353400556 |

|            |                                     |             |             |
|------------|-------------------------------------|-------------|-------------|
| cg11359133 | EVX2                                | 0.000654035 | 0.353397627 |
| cg18202449 | ELAVL4                              | 3.34E-05    | 0.353387505 |
| cg22560214 |                                     | 3.34E-05    | 0.353380583 |
| cg12572625 | PCDHB1;PCDHB1                       | 9.24E-05    | 0.353378305 |
| cg02117721 | CXCL6;CXCL6                         | 8.60E-06    | 0.353375577 |
| cg00629514 |                                     | 8.60E-06    | 0.353368869 |
| cg23110109 | MORN3                               | 0.000117986 | 0.353366349 |
| cg27106959 | SRRM4                               | 1.50E-05    | 0.353359618 |
| cg10139846 | INADL                               | 9.24E-05    | 0.353355452 |
| cg19060383 | NPHS1                               | 8.60E-06    | 0.353340921 |
| cg06419432 |                                     | 0.001147425 | 0.353317171 |
| cg20094085 | PHYHIPL;PHYHIPL                     | 0.000117986 | 0.353294791 |
| cg01257828 | FGF12;FGF12                         | 8.60E-06    | 0.353292982 |
| cg04175027 |                                     | 8.60E-06    | 0.353286188 |
| cg09597312 |                                     | 8.60E-06    | 0.353253206 |
| cg17797848 | MYBPHL                              | 0.000117986 | 0.353246891 |
| cg04969067 | LYNX1;LYNX1;LYNX1;LYNX1             | 0.000537905 | 0.353238311 |
| cg05134015 | SFTA3                               | 5.59E-05    | 0.353234421 |
| cg26053864 | ACTC1                               | 9.24E-05    | 0.353224669 |
| cg04686354 | MRPS7                               | 4.34E-05    | 0.353223299 |
| cg26367591 | BRSK2                               | 0.000187194 | 0.353217203 |
| cg06436905 | GLRB;GLRB;GLRB                      | 0.000117986 | 0.353211328 |
| cg02066682 | FOXB2                               | 1.11E-05    | 0.353177541 |
| cg19485539 | GFRA1;GFRA1;GFRA1                   | 0.000654035 | 0.353173889 |
| cg03712816 | SALL3                               | 1.11E-05    | 0.353144813 |
| cg25778535 | RIC3;RIC3;RIC3;RIC3                 | 7.23E-05    | 0.353142578 |
| cg00043819 |                                     | 2.58E-05    | 0.353141127 |
| cg14068328 | TBX18                               | 1.96E-05    | 0.353140356 |
| cg06957447 |                                     | 0.000187194 | 0.353138848 |
| cg12177743 | TTC12                               | 3.34E-05    | 0.353124445 |
| cg12745335 | MYST2                               | 0.001639597 | 0.353121226 |
| cg01676795 | POR                                 | 1.11E-05    | 0.353106384 |
| cg03559235 | LONRF2                              | 0.000233422 | 0.353085307 |
| cg01866606 |                                     | 2.58E-05    | 0.353069496 |
| cg16558770 | ZNF710                              | 0.000537905 | 0.353061215 |
| cg10280223 | AP3B2                               | 3.34E-05    | 0.353044606 |
| cg07021644 | UPK3A;UPK3A;UPK3A;UPK3A             | 0.000654035 | 0.353042896 |
| cg09420637 |                                     | 0.000233422 | 0.353036771 |
| cg27302539 |                                     | 0.000357885 | 0.353031974 |
| cg00027232 | TGOLN2                              | 2.58E-05    | 0.353030946 |
| cg11770080 | BHMT                                | 0.000955793 | 0.353001412 |
| cg13674271 |                                     | 0.000187194 | 0.353000739 |
| cg10606834 |                                     | 5.59E-05    | 0.352992344 |
| cg02295078 | ZNF287                              | 7.23E-05    | 0.352989411 |
| cg25693769 | SUSD5                               | 1.96E-05    | 0.352984742 |
| cg11326968 | FAM13C;FAM13C;FAM13C;FAM13C;FAM13C  | 0.000262362 | 0.352961507 |
| cg10284973 | C10orf41;C10orf41                   | 0.000233422 | 0.352960109 |
| cg16178603 | MEIS1                               | 3.34E-05    | 0.352951018 |
| cg01838004 | KIAA1529                            | 8.60E-06    | 0.352927067 |
| cg17507952 | MARCH11                             | 2.08E-05    | 0.352920448 |
| cg19308222 | EREG                                | 5.59E-05    | 0.352917468 |
| cg27312388 | OPCML                               | 0.000187194 | 0.352910963 |
| cg19762657 | MAL;MAL;MAL;MAL                     | 8.60E-06    | 0.352898717 |
| cg06275059 | PCDP1                               | 4.34E-05    | 0.352881881 |
| cg02508664 | HTR1E                               | 8.60E-06    | 0.352881244 |
| cg21775570 | SKI                                 | 0.000205664 | 0.352859988 |
| cg07477602 | PPAP2B;PPAP2B                       | 0.000117986 | 0.352857782 |
| cg03411507 | TRPC6;TRPC6                         | 1.11E-05    | 0.352855552 |
| cg06064179 | PLEKHM1P                            | 3.34E-05    | 0.352849176 |
| cg10151741 | PTPRS;PTPRS;PTPRS;PTPRS;PTPRS;PTPRS | 0.00043997  | 0.352848107 |

|            |                                     |             |             |
|------------|-------------------------------------|-------------|-------------|
| cg11537367 |                                     | 0.000357885 | 0.352831493 |
| cg16420798 | STK32A;STK32A                       | 4.34E-05    | 0.352829988 |
| cg11645631 | FAM159B                             | 4.34E-05    | 0.352818732 |
| cg00181125 |                                     | 8.60E-06    | 0.352809082 |
| cg04386206 | SLC7A14                             | 7.23E-05    | 0.352798224 |
| cg04079301 | ZIC4;ZIC4;ZIC4;ZIC4;ZIC4            | 8.60E-06    | 0.352768185 |
| cg16596523 | PKP2;PKP2                           | 1.11E-05    | 0.352765872 |
| cg20180370 | TFAP2D                              | 7.23E-05    | 0.352757774 |
| cg20962117 |                                     | 0.000117986 | 0.352752142 |
| cg07539798 | PCDHGA4;PCDHGA11;PCDHGA11;PCDHGA9   | 1.96E-05    | 0.352749017 |
| cg15549927 | DPP6;DPP6                           | 1.11E-05    | 0.352713649 |
| cg04286455 | LHFPL2                              | 0.002714607 | 0.352704907 |
| cg04231085 |                                     | 3.34E-05    | 0.352695859 |
| cg12002303 |                                     | 4.34E-05    | 0.352691854 |
| cg00152946 |                                     | 0.001376172 | 0.352678848 |
| cg16956426 | SGCE;SGCE;PEG10;SGCE;PEG10          | 1.96E-05    | 0.352671921 |
| cg07964216 | LPL;LPL                             | 7.23E-05    | 0.352668832 |
| cg03985727 | MEOX2                               | 9.24E-05    | 0.352666497 |
| cg09284708 | MOCS1;MOCS1                         | 1.50E-05    | 0.352664984 |
| cg17222645 | LOC348840                           | 0.006823935 | 0.352663213 |
| cg15206171 | KIFC1                               | 3.34E-05    | 0.352641588 |
| cg24291087 | PCDH7;PCDH7;PCDH7;PCDH7;PCDH7;PCDH7 | 0.000233422 | 0.352638055 |
| cg01899542 | ZNF423                              | 0.003189589 | 0.352634666 |
| cg03140968 | PAX1                                | 1.50E-05    | 0.3526323   |
| cg03553587 |                                     | 2.58E-05    | 0.352632049 |
| cg26845297 |                                     | 1.50E-05    | 0.352613428 |
| cg16536824 | PLA2G7;PLA2G7                       | 8.60E-06    | 0.352609123 |
| cg17833106 | PVRL4                               | 0.000148457 | 0.352602584 |
| cg25790531 |                                     | 0.000117986 | 0.352549431 |
| cg20371765 | ICA1;ICA1;ICA1                      | 9.24E-05    | 0.352535147 |
| cg17535647 | PDE3A                               | 0.00043997  | 0.352506858 |
| cg12806353 | PLA1A                               | 4.34E-05    | 0.352506511 |
| cg11469061 | PAX6;PAX6;PAX6                      | 3.34E-05    | 0.352486594 |
| cg11372422 | UGT8;UGT8                           | 1.96E-05    | 0.352450813 |
| cg06808498 | SIX6                                | 4.34E-05    | 0.352450356 |
| cg11718030 | BDNF                                | 0.000117986 | 0.352445101 |
| cg23193639 | IGFBP3;IGFBP3                       | 0.001639597 | 0.35243144  |
| cg17508591 | PCDHA6;PCDHA2;PCDHA1;PCDHA7;PCDHA1  | 2.58E-05    | 0.352413187 |
| cg04640920 |                                     | 0.000148457 | 0.352396654 |
| cg09509183 | IRF6                                | 0.000117986 | 0.352373447 |
| cg18309752 | SUMO1;SUMO1;SUMO1                   | 1.50E-05    | 0.352372271 |
| cg11453343 | FAM176A;FAM176A                     | 3.34E-05    | 0.352366295 |
| cg06059360 | NKTR                                | 0.000187194 | 0.352358259 |
| cg23994043 | SATB2                               | 0.000955793 | 0.352351084 |
| cg02935338 | CDH2                                | 5.59E-05    | 0.352346752 |
| cg12493075 |                                     | 3.34E-05    | 0.352335864 |
| cg19250799 |                                     | 4.34E-05    | 0.352331637 |
| cg22474886 | SASH1                               | 9.24E-05    | 0.35232264  |
| cg25185173 |                                     | 0.00043997  | 0.352312371 |
| cg16419629 | NLGN1                               | 7.23E-05    | 0.35230625  |
| cg08368934 | GPR97                               | 7.23E-05    | 0.352302637 |
| cg01186457 | NPHS1                               | 1.11E-05    | 0.352292217 |
| cg21931419 | TMEM90A                             | 0.000233422 | 0.352286565 |
| cg24111955 |                                     | 0.000357885 | 0.352278756 |
| cg13297960 | NCAM2                               | 4.34E-05    | 0.352238845 |
| cg20488281 | CCDC60                              | 9.24E-05    | 0.352232582 |
| cg00183186 | HTR1B                               | 1.96E-05    | 0.352193211 |
| cg23332582 | SPSB4                               | 0.004357816 | 0.352192236 |
| cg11851456 | NGDN;NGDN                           | 0.005897668 | 0.352190816 |
| cg01522826 | TSPAN19;LRR1Q1;LRR1Q1;LRR1Q1;LRR1Q1 | 9.24E-05    | 0.352172548 |

|            |                                    |             |             |
|------------|------------------------------------|-------------|-------------|
| cg20041802 | RORA                               | 3.34E-05    | 0.352170257 |
| cg05547200 |                                    | 0.000233422 | 0.352165241 |
| cg17482089 | PCDHA6;PCDHA2;PCDHA1;PCDHA9;PCDHA7 | 4.34E-05    | 0.352155933 |
| cg15057061 | SOX2OT                             | 0.000290372 | 0.352153958 |
| cg00935653 |                                    | 2.58E-05    | 0.352151234 |
| cg16767801 | PAX1                               | 0.000117986 | 0.352149264 |
| cg03302259 | ACP5;ACP5;ACP5;ACP5                | 0.000537905 | 0.352142677 |
| cg12765064 |                                    | 0.000117986 | 0.352139014 |
| cg12167167 | LOC441177;C6orf176;C6orf176        | 0.000357885 | 0.352136009 |
| cg02832512 | FLJ22536                           | 9.24E-05    | 0.352123159 |
| cg13738144 | PRDM13;PRDM13                      | 1.50E-05    | 0.35212297  |
| cg25012739 |                                    | 2.58E-05    | 0.352121526 |
| cg15193782 | ARMC3;ARMC3                        | 1.50E-05    | 0.352112944 |
| cg16823535 |                                    | 1.96E-05    | 0.352108575 |
| cg22055427 | P2RY1                              | 0.000148457 | 0.352100816 |
| cg06679720 | DLEU7                              | 0.000148457 | 0.352086671 |
| cg18023065 | FUT4                               | 7.23E-05    | 0.352083813 |
| cg22678398 | RAP2B;RAP2B                        | 0.003734675 | 0.352079297 |
| cg04048259 | EDN3;EDN3;EDN3;EDN3                | 0.006823935 | 0.35207546  |
| cg10994148 | C6orf168                           | 0.000117986 | 0.352025874 |
| cg14873600 |                                    | 8.60E-06    | 0.352019851 |
| cg24922143 |                                    | 0.00043997  | 0.352012975 |
| cg15627078 | TNFRSF19;TNFRSF19                  | 0.005897668 | 0.352006817 |
| cg20381975 |                                    | 2.39E-05    | 0.35200411  |
| cg01048372 | C8orf73                            | 8.60E-06    | 0.35200182  |
| cg14184873 | RND3                               | 4.34E-05    | 0.351977163 |
| cg21126487 |                                    | 2.80E-05    | 0.351961184 |
| cg20410810 | CACNG4                             | 0.000955793 | 0.351959324 |
| cg20931033 | AGBL4;AGBL4                        | 8.60E-06    | 0.351948105 |
| cg23421262 | SNCAIP                             | 0.000357885 | 0.35194453  |
| cg00822399 |                                    | 1.50E-05    | 0.351925171 |
| cg14535980 | C2orf40                            | 0.000187194 | 0.351920555 |
| cg27062759 |                                    | 0.001376172 | 0.351915213 |
| cg10275315 | BNC1                               | 5.59E-05    | 0.351905623 |
| cg07901138 | TDRD5                              | 1.50E-05    | 0.351893037 |
| cg20578175 | ADAMTS17                           | 0.002450672 | 0.351889404 |
| cg08143343 | SLC6A15;SLC6A15;SLC6A15            | 0.000187194 | 0.351882698 |
| cg02859837 | PTGFR;PTGFR                        | 2.58E-05    | 0.35187333  |
| cg04603976 | ZBTB7A                             | 3.34E-05    | 0.35187063  |
| cg00254133 | NTSR1;NTSR1                        | 0.000187194 | 0.351862179 |
| cg11597277 | SUMO1P1                            | 2.58E-05    | 0.351851478 |
| cg13571358 | TMEM171;TMEM171                    | 1.96E-05    | 0.351824933 |
| cg01758805 | STOX2;STOX2                        | 2.58E-05    | 0.35181855  |
| cg18032969 |                                    | 1.96E-05    | 0.351817155 |
| cg09994553 | TAF3                               | 0.001195582 | 0.351813537 |
| cg23778841 | TFDP1;TFDP1                        | 0.000148457 | 0.351805158 |
| cg11558731 | MYH14;MYH14;MYH14                  | 4.34E-05    | 0.351792889 |
| cg25835226 |                                    | 3.34E-05    | 0.351787942 |
| cg02960853 | GPR37                              | 0.000233422 | 0.351782358 |
| cg03442378 | ALX4                               | 0.000791389 | 0.351770704 |
| cg21923442 | MPPED2                             | 0.000537905 | 0.351751379 |
| cg05787556 | TLX3                               | 8.60E-06    | 0.351711845 |
| cg07033624 |                                    | 2.58E-05    | 0.351707907 |
| cg03606772 | CRCT1                              | 0.000233422 | 0.351694232 |
| cg02756683 |                                    | 0.004357816 | 0.351667362 |
| cg01632240 | AP3M2;AP3M2                        | 1.96E-05    | 0.351659352 |
| cg25523509 | PAX2;PAX2;PAX2;PAX2;PAX2           | 0.000290372 | 0.351656031 |
| cg05398580 | C7orf52                            | 0.000233422 | 0.351652408 |
| cg21129615 | PCOLCE2;PCOLCE2                    | 0.000791389 | 0.351630979 |
| cg14033514 |                                    | 8.60E-06    | 0.351620438 |

|            |                                   |             |             |
|------------|-----------------------------------|-------------|-------------|
| cg18336674 | TLX3                              | 2.58E-05    | 0.351611558 |
| cg17807479 | SHISA6                            | 1.96E-05    | 0.351608569 |
| cg20620326 |                                   | 4.34E-05    | 0.351599867 |
| cg24277313 | PRKAA2                            | 0.000148457 | 0.351596902 |
| cg24919972 | FYCO1                             | 3.34E-05    | 0.351575307 |
| cg10708905 | LRIG3;LRIG3                       | 5.59E-05    | 0.351573796 |
| cg18546236 |                                   | 1.50E-05    | 0.351554802 |
| cg26799209 | MSC                               | 8.60E-06    | 0.351542292 |
| cg26989374 | ZNF830;CCT6B                      | 0.000187194 | 0.351530145 |
| cg08363794 | HOXD9                             | 1.50E-05    | 0.351527894 |
| cg25920792 | HTRA1                             | 7.23E-05    | 0.351504707 |
| cg10692363 |                                   | 9.24E-05    | 0.351502022 |
| cg08927739 | ASCL1                             | 3.34E-05    | 0.351478891 |
| cg26693467 | EMX2OS;EMX2;EMX2                  | 3.34E-05    | 0.351472354 |
| cg00246932 | DKFZP434H168;GNAO1;GNAO1          | 0.002304201 | 0.351466769 |
| cg14554491 | C19orf30                          | 9.24E-05    | 0.351436486 |
| cg23508813 |                                   | 1.11E-05    | 0.351435554 |
| cg15042811 | FREM3                             | 0.001639597 | 0.351432322 |
| cg00511674 |                                   | 5.59E-05    | 0.351427124 |
| cg08722774 |                                   | 0.000117986 | 0.35142264  |
| cg16151503 | CCNY;CCNY                         | 0.000117986 | 0.351417843 |
| cg18077304 | SLC4A8;SLC4A8                     | 0.000187194 | 0.351417569 |
| cg15179113 | C7orf13;RNF32                     | 0.007869847 | 0.351413944 |
| cg13686044 |                                   | 0.000262362 | 0.351413127 |
| cg11905488 | CLEC12A;CLEC12A                   | 0.000791389 | 0.35139771  |
| cg26019112 | PAX6;PAX6;PAX6                    | 7.23E-05    | 0.351387883 |
| cg04401986 | FGF5;FGF5                         | 2.58E-05    | 0.351383024 |
| cg23462514 | RNF212;RNF212                     | 0.000290372 | 0.351375289 |
| cg14799457 |                                   | 0.000148457 | 0.351357164 |
| cg24188073 | PARM1                             | 0.005897668 | 0.35135205  |
| cg23424273 | HTR1B                             | 1.96E-05    | 0.351346183 |
| cg02902975 | LRRC36;KCTD19                     | 0.001376172 | 0.351327307 |
| cg16970851 | ST8SIA1                           | 0.000205664 | 0.35132113  |
| cg17357285 |                                   | 0.000233422 | 0.351317391 |
| cg03780851 | GRHL2                             | 1.50E-05    | 0.351281261 |
| cg02936872 | CTSL2                             | 0.000117986 | 0.351268689 |
| cg08101303 | DLX5                              | 0.000791389 | 0.351257577 |
| cg15501281 | SLC24A3                           | 0.000357885 | 0.35124909  |
| cg27075187 | TEAD1;TEAD1                       | 0.000654035 | 0.351235472 |
| cg16206504 |                                   | 7.23E-05    | 0.351226302 |
| cg22612764 | FAM3B;FAM3B                       | 0.000233422 | 0.351215787 |
| cg20710519 |                                   | 0.001147425 | 0.351196996 |
| cg18830442 | SAMD5                             | 1.11E-05    | 0.351192583 |
| cg05234035 |                                   | 0.001948248 | 0.351191535 |
| cg08430329 | NOTO                              | 7.23E-05    | 0.351187971 |
| cg14196840 | CTTNBP2                           | 7.23E-05    | 0.351176736 |
| cg09892203 | CACNG4                            | 4.34E-05    | 0.351152995 |
| cg26896762 | ISL1;ISL1                         | 8.60E-06    | 0.351152158 |
| cg22605919 | C17orf104                         | 0.000117986 | 0.351151349 |
| cg04226002 | ZBTB16;ZBTB16                     | 0.001147425 | 0.351150855 |
| cg23158731 | COL14A1                           | 1.96E-05    | 0.351141582 |
| cg20973720 | RASGRF1;RASGRF1;RASGRF1;RASGRF1   | 0.000654035 | 0.351127448 |
| cg01866431 | GLT1D1                            | 4.34E-05    | 0.351114986 |
| cg04836428 | DTNA;DTNA;DTNA                    | 3.34E-05    | 0.351109404 |
| cg17507573 | RASGRF1;RASGRF1;RASGRF1;RASGRF1   | 9.24E-05    | 0.351108677 |
| cg02083559 | SOX5;SOX5                         | 0.000187194 | 0.351106098 |
| cg24690314 | PHACTR2;PHACTR2;PHACTR2;PHACTR2   | 4.34E-05    | 0.351103482 |
| cg02477557 |                                   | 0.000955793 | 0.351095115 |
| cg20989855 | KCNIP4;KCNIP4;KCNIP4;KCNIP4       | 7.23E-05    | 0.351086294 |
| cg24228819 | CHRM2;CHRM2;CHRM2;CHRM2;CHRM2;CHR | 1.50E-05    | 0.351077791 |



|            |                                      |             |             |
|------------|--------------------------------------|-------------|-------------|
| cg00821098 | ENTPD7                               | 0.000148457 | 0.351061723 |
| cg13623495 |                                      | 8.60E-06    | 0.351036668 |
| cg15677916 |                                      | 1.96E-05    | 0.351032779 |
| cg01972751 | OLIG3                                | 0.000537905 | 0.351012133 |
| cg04719819 | KCNA4                                | 1.50E-05    | 0.351001065 |
| cg09447675 |                                      | 0.00043997  | 0.350999475 |
| cg22400015 | RESP18                               | 1.96E-05    | 0.350991518 |
| cg27013696 | TWIST1                               | 0.000117986 | 0.350989305 |
| cg16400999 | ZNF385B;MIR1258                      | 0.000357885 | 0.350979735 |
| cg21488279 | PRDM6                                | 1.96E-05    | 0.350971951 |
| cg07927379 | C7orf13;RNF32                        | 0.000654035 | 0.350965971 |
| cg09126273 | PTPRO;PTPRO                          | 0.000148457 | 0.350961538 |
| cg00861009 | HOXD11                               | 0.002927025 | 0.350961385 |
| cg02291164 |                                      | 5.59E-05    | 0.350958224 |
| cg07757861 | PTPRZ1                               | 1.11E-05    | 0.350955544 |
| cg24874350 |                                      | 1.11E-05    | 0.350953209 |
| cg02060689 |                                      | 5.59E-05    | 0.350946427 |
| cg23363832 | RBP1;RBP1;RBP1                       | 0.002304201 | 0.350934703 |
| cg19367540 | KCND3;KCND3                          | 0.000117986 | 0.350922136 |
| cg12480034 | DAB1                                 | 3.34E-05    | 0.350921482 |
| cg11676902 | PRDM13                               | 5.59E-05    | 0.350916582 |
| cg01572696 | IDUA                                 | 4.34E-05    | 0.350905424 |
| cg12422450 | CHGA                                 | 7.23E-05    | 0.350903815 |
| cg26371320 |                                      | 0.000117986 | 0.350897194 |
| cg13381984 | LEP;LEP                              | 2.58E-05    | 0.350884316 |
| cg26352006 | RAI14;RAI14;RAI14;RAI14;RAI14;RAI14  | 0.001147425 | 0.350884274 |
| cg04943741 | VPS28;VPS28                          | 1.96E-05    | 0.350880157 |
| cg02026062 | FAM162B                              | 4.34E-05    | 0.350864903 |
| cg13218903 | RPRM                                 | 7.23E-05    | 0.350859458 |
| cg27431596 | ZNF697                               | 0.001639597 | 0.350851935 |
| cg26926612 |                                      | 9.24E-05    | 0.350846608 |
| cg01046309 | TMC7;TMC7                            | 0.000187194 | 0.350811589 |
| cg06779449 | TOX2;TOX2;TOX2                       | 0.000117986 | 0.350762947 |
| cg03094134 | TRIM39;TRIM39                        | 4.34E-05    | 0.350761519 |
| cg15811668 | MEG8                                 | 0.0050758   | 0.350736615 |
| cg01311151 |                                      | 0.000233422 | 0.350736395 |
| cg22367678 |                                      | 3.34E-05    | 0.350709202 |
| cg01498829 | EVL                                  | 1.50E-05    | 0.350702889 |
| cg04839259 | TACC2;TACC2                          | 1.11E-05    | 0.350700468 |
| cg11752100 | POU6F2;POU6F2                        | 0.000357885 | 0.350697151 |
| cg25344401 | FOXK1                                | 0.001948248 | 0.350692146 |
| cg19425332 | VAX1;VAX1                            | 2.58E-05    | 0.350678576 |
| cg23325963 |                                      | 2.58E-05    | 0.350669775 |
| cg11163901 | NKX6-2                               | 1.50E-05    | 0.350663109 |
| cg14186066 | SIX6;SIX6                            | 1.11E-05    | 0.350657109 |
| cg21780711 |                                      | 1.11E-05    | 0.350657008 |
| cg13723118 | NTRK2;NTRK2;NTRK2;NTRK2;NTRK2;NTRK2; | 0.000117986 | 0.350640605 |
| cg26551026 | CABLES1;CABLES1                      | 4.34E-05    | 0.350636217 |
| cg24928333 |                                      | 4.34E-05    | 0.35060518  |
| cg14489366 | PRUNE2                               | 9.24E-05    | 0.350604778 |
| cg17160751 | TACR3                                | 8.60E-06    | 0.350600072 |
| cg02527112 | HOXD11                               | 8.60E-06    | 0.350583226 |
| cg22355517 | PDE3A                                | 3.34E-05    | 0.350581447 |
| cg05304531 | DHDDS;HMGN2;DHDDS                    | 0.000791389 | 0.350579357 |
| cg17199800 | DLX6AS                               | 1.11E-05    | 0.350575008 |
| cg15684962 |                                      | 8.60E-06    | 0.350569433 |
| cg06163371 | EPHA10;EPHA10                        | 0.000187194 | 0.350554568 |
| cg17051321 | BNC1                                 | 1.50E-05    | 0.350525071 |
| cg21214293 |                                      | 1.11E-05    | 0.350524938 |
| cg05059605 | BARX2                                | 0.006823935 | 0.350521864 |

|            |                                        |             |             |
|------------|----------------------------------------|-------------|-------------|
| cg00760935 | DCHS2;DCHS2                            | 2.58E-05    | 0.350518298 |
| cg24387472 |                                        | 9.24E-05    | 0.350492244 |
| cg12298268 | RBP1;RBP1;RBP1                         | 0.000537905 | 0.350482698 |
| cg12818557 | MMP16;MMP16                            | 0.000290372 | 0.350477668 |
| cg20789700 | RBM47                                  | 0.000537905 | 0.350476718 |
| cg13019143 | DLX6AS                                 | 0.000117986 | 0.350475025 |
| cg05210904 |                                        | 8.60E-06    | 0.35047381  |
| cg08697689 | SLITRK1                                | 8.60E-06    | 0.350468412 |
| cg17607298 |                                        | 0.000233422 | 0.350458256 |
| cg14252279 | DAB2IP                                 | 0.000955793 | 0.350452315 |
| cg17444738 | NKX6-1                                 | 8.60E-06    | 0.350449321 |
| cg16196812 | PRLHR;PRLHR                            | 8.60E-06    | 0.350436784 |
| cg15281710 |                                        | 1.50E-05    | 0.350407929 |
| cg04851712 |                                        | 4.34E-05    | 0.350393475 |
| cg14288330 | INSM2                                  | 0.000955793 | 0.350382727 |
| cg16357388 | CRMP1                                  | 7.23E-05    | 0.350346332 |
| cg11521965 | PTN                                    | 0.000187194 | 0.350345005 |
| cg04892170 | ADAM12;ADAM12;ADAM12;ADAM12            | 1.11E-05    | 0.350343206 |
| cg12052661 | CACNA1B                                | 1.50E-05    | 0.35033965  |
| cg10805039 | NXN                                    | 0.00043997  | 0.350330451 |
| cg08330224 | SHISA9;SHISA9                          | 0.000654035 | 0.350284667 |
| cg18071147 | FAM189A1                               | 0.000148457 | 0.350254876 |
| cg09214243 |                                        | 0.000117986 | 0.350250331 |
| cg08196553 | SOX2OT                                 | 5.59E-05    | 0.350245132 |
| cg05006067 | DOC2B                                  | 0.000148457 | 0.350241035 |
| cg17592231 |                                        | 1.50E-05    | 0.350218989 |
| cg00094898 |                                        | 0.000357885 | 0.350216045 |
| cg21858485 |                                        | 0.000233422 | 0.350211524 |
| cg24322398 | FADS6                                  | 0.000537905 | 0.350208422 |
| cg13292042 |                                        | 0.000117986 | 0.350181611 |
| cg21429745 | LBX2                                   | 7.23E-05    | 0.350170635 |
| cg06959053 | RASGRF1;RASGRF1                        | 0.000365373 | 0.350170101 |
| cg13392022 | ADAR                                   | 8.60E-06    | 0.350168384 |
| cg14576896 | GJD2                                   | 1.50E-05    | 0.350129131 |
| cg20043105 | C14orf23;C14orf23                      | 1.96E-05    | 0.350128019 |
| cg08115833 |                                        | 1.50E-05    | 0.350126784 |
| cg12825804 | VASH1                                  | 9.24E-05    | 0.350098971 |
| cg15779716 | CDCP1;CDCP1                            | 5.59E-05    | 0.350097578 |
| cg24370698 | PGM1                                   | 0.000955793 | 0.350094558 |
| cg00586817 |                                        | 2.58E-05    | 0.350092587 |
| cg15162330 | LIMCH1;LIMCH1;LIMCH1                   | 4.34E-05    | 0.350088944 |
| cg18587806 | LIMCH1;LIMCH1;LIMCH1;LIMCH1;LIMCH1;LIM | 0.002040485 | 0.350076468 |
| cg03120185 | PRDM13                                 | 4.34E-05    | 0.35004454  |
| cg25287268 | DLEU2                                  | 0.000955793 | 0.350040129 |
| cg20969194 | PAX3;PAX3;PAX3;CCDC140;PAX3;PAX3;PAX3  | 1.50E-05    | 0.350028414 |
| cg05960938 |                                        | 0.000233422 | 0.350021908 |
| cg10743390 | VSTM2B                                 | 1.11E-05    | 0.350021724 |
| cg11529819 | FCN3;FCN3                              | 0.000187194 | 0.350018695 |
| cg24453699 |                                        | 0.00043997  | 0.349987162 |
| cg00557360 | C20orf95                               | 0.000187194 | 0.349974804 |
| cg06335343 | TMEM20;TMEM20                          | 0.000148457 | 0.349971439 |
| cg02976719 | PPAPDC1A                               | 0.000537905 | 0.349951749 |
| cg20510207 | EPHA10;EPHA10;EPHA10;EPHA10            | 0.001376172 | 0.349909308 |
| cg12124386 | FAM5C                                  | 3.34E-05    | 0.349902504 |
| cg26194477 | FOXP1                                  | 2.58E-05    | 0.349897167 |
| cg09165004 |                                        | 0.000187194 | 0.349891067 |
| cg24012880 | TSPAN18                                | 0.001948248 | 0.349890079 |
| cg07980216 | OSBP2                                  | 1.11E-05    | 0.349822155 |
| cg07922443 | HAND1                                  | 5.59E-05    | 0.349811084 |
| cg01075271 |                                        | 4.34E-05    | 0.34981047  |

|            |                             |             |             |
|------------|-----------------------------|-------------|-------------|
| cg14748795 |                             | 3.34E-05    | 0.349808873 |
| cg20387341 | FGF10                       | 3.34E-05    | 0.349805141 |
| cg13016524 |                             | 8.60E-06    | 0.349782671 |
| cg06346138 | MST1P9                      | 8.60E-06    | 0.349780238 |
| cg04908625 | ADCY5                       | 8.60E-06    | 0.349774877 |
| cg07413251 |                             | 0.001147425 | 0.349770903 |
| cg14795968 | ACADL                       | 8.60E-06    | 0.349766532 |
| cg18175808 |                             | 3.21E-05    | 0.349757848 |
| cg01945562 | PLOD2;PLOD2;PLOD2;PLOD2     | 5.59E-05    | 0.349749136 |
| cg13095704 | CALCR;CALCR                 | 7.23E-05    | 0.34971205  |
| cg18802998 |                             | 0.000537905 | 0.349709639 |
| cg02591356 |                             | 0.000233422 | 0.349692287 |
| cg09538995 | SLC27A6;SLC27A6             | 2.58E-05    | 0.349685376 |
| cg10422777 |                             | 2.58E-05    | 0.349682274 |
| cg07687119 | HOXC4;HOXC6;HOXC5;HOXC6     | 0.001147425 | 0.349681996 |
| cg23951961 | BEND4;BEND4                 | 0.000262362 | 0.349656763 |
| cg15852572 | PAQR9                       | 0.000122184 | 0.349653494 |
| cg16707405 | CDO1                        | 0.000148457 | 0.349636447 |
| cg01168235 |                             | 1.96E-05    | 0.349628022 |
| cg14648916 | CPLX2                       | 5.59E-05    | 0.349624313 |
| cg06433879 | SNAP25;SNAP25               | 4.34E-05    | 0.349603511 |
| cg03465947 |                             | 0.000117986 | 0.349581522 |
| cg19671533 | SNAP91;SNAP91               | 5.59E-05    | 0.349535752 |
| cg09607276 | DRD4                        | 0.002714607 | 0.349528103 |
| cg20649017 | HOXD10                      | 0.000117986 | 0.349525233 |
| cg19304273 |                             | 8.60E-06    | 0.349522771 |
| cg10457563 | KIF6;KIF6                   | 0.001147425 | 0.349520558 |
| cg08449389 |                             | 1.11E-05    | 0.349519442 |
| cg07037371 |                             | 0.00043997  | 0.349507799 |
| cg16712637 | ASCL1;ASCL1                 | 0.000148457 | 0.3494976   |
| cg01241721 |                             | 7.23E-05    | 0.349483682 |
| cg27423760 | SALL1                       | 2.58E-05    | 0.349468318 |
| cg25116388 | HOXB8                       | 1.50E-05    | 0.349464076 |
| cg17940821 |                             | 2.58E-05    | 0.349452736 |
| cg00485194 | ZNF385D;ZNF385D             | 8.60E-06    | 0.349451644 |
| cg01188592 | RSPO4;RSPO4;RSPO4;RSPO4     | 5.59E-05    | 0.349435724 |
| cg04175111 |                             | 4.34E-05    | 0.349418955 |
| cg00397673 | RAX                         | 4.34E-05    | 0.349395451 |
| cg00083188 | KCNMA1;KCNMA1;KCNMA1;KCNMA1 | 0.001376172 | 0.349373941 |
| cg10150592 |                             | 5.59E-05    | 0.349372392 |
| cg14225168 | NOTCH1                      | 0.000187194 | 0.349361756 |
| cg03917138 | SOX9                        | 5.59E-05    | 0.349353379 |
| cg04673937 | MIR548H4                    | 9.24E-05    | 0.34934997  |
| cg23390619 | ARHGAP22                    | 0.000187194 | 0.349335838 |
| cg17385088 |                             | 2.58E-05    | 0.349327571 |
| cg04490714 | SLC6A2;SLC6A2               | 4.34E-05    | 0.349325863 |
| cg13941682 | PCGF3                       | 2.58E-05    | 0.349325659 |
| cg24114154 | HOXB4                       | 0.000187194 | 0.349322396 |
| cg03983543 | C7orf57                     | 1.11E-05    | 0.349317019 |
| cg09897374 |                             | 0.000148457 | 0.349309537 |
| cg18856632 |                             | 8.60E-06    | 0.349302679 |
| cg14908255 | IQSEC3;IQSEC3               | 0.000233422 | 0.349298748 |
| cg00567190 | C1orf97                     | 0.00043997  | 0.349289308 |
| cg26601317 | KCNQ1DN                     | 1.50E-05    | 0.349279293 |
| cg12537382 |                             | 0.000117986 | 0.349264331 |
| cg11826104 | UBE3A;UBE3A;UBE3A;UBE3A     | 0.000117986 | 0.349257764 |
| cg16608018 |                             | 2.58E-05    | 0.349253816 |
| cg14664621 | TACR3                       | 0.000405139 | 0.349227554 |
| cg26036993 | CYP1B1                      | 0.000148457 | 0.349227392 |
| cg18026631 |                             | 5.59E-05    | 0.349216166 |

|            |                                     |             |             |
|------------|-------------------------------------|-------------|-------------|
| cg15904283 |                                     | 9.24E-05    | 0.349204422 |
| cg20947082 | KCNK1                               | 0.000148457 | 0.349196431 |
| cg02968429 | NR2F2;NR2F2                         | 5.59E-05    | 0.349183848 |
| cg20440901 | SLC19A3                             | 1.96E-05    | 0.349167919 |
| cg01932823 | GPR97                               | 9.24E-05    | 0.349151519 |
| cg10486998 | GALR1                               | 2.58E-05    | 0.34913332  |
| cg19694010 |                                     | 0.000290372 | 0.349131499 |
| cg05789595 | DST;DST;DST;DST                     | 0.000791389 | 0.349105228 |
| cg18714767 | FAM18B2;FAM18B2;FAM18B2;FAM18B2     | 0.000233422 | 0.349101318 |
| cg24818566 | DBC1                                | 8.60E-06    | 0.349096055 |
| cg16004055 | SCARA5                              | 3.34E-05    | 0.349083296 |
| cg06889108 | CPEB4                               | 7.23E-05    | 0.349081299 |
| cg04633225 | PDX1                                | 0.000117986 | 0.349067834 |
| cg17630392 | NPR3                                | 0.000955793 | 0.349067276 |
| cg14306819 | ERCC3                               | 0.000187194 | 0.349060826 |
| cg20192387 | RPS6KA2;RPS6KA2                     | 1.96E-05    | 0.349028618 |
| cg13766864 | KCNE3                               | 1.50E-05    | 0.34902529  |
| cg03086707 | PCDHGA4;PCDHGA2;PCDHGB2;PCDHGA1;PCD | 0.000357885 | 0.349022163 |
| cg17267805 | CXCL12;CXCL12;CXCL12                | 0.009066563 | 0.349018509 |
| cg23013850 | FAM124B;FAM124B                     | 0.0050758   | 0.348997647 |
| cg00998438 | ILDR2                               | 0.000101153 | 0.348997333 |
| cg11583475 | CCDC149;CCDC149                     | 0.001639597 | 0.348985929 |
| cg25959239 | LARP6;LARP6                         | 0.000654035 | 0.348984988 |
| cg13054224 | IGDCC3                              | 8.60E-06    | 0.348971061 |
| cg15513743 | TBX15                               | 0.000955793 | 0.348966272 |
| cg12629325 | PCDHAC1;PCDHA7;PCDHAC1;PCDHA12;PCD  | 3.34E-05    | 0.348961315 |
| cg02179652 | BSX                                 | 0.000357885 | 0.348951857 |
| cg16847428 |                                     | 1.50E-05    | 0.348951665 |
| cg13909214 | ESRP1;ESRP1;ESRP1;ESRP1;ESRP1       | 9.24E-05    | 0.348946564 |
| cg05178576 | ADAMTS18                            | 0.000148457 | 0.348939328 |
| cg03295083 | NRXN1;NRXN1;NRXN1                   | 0.00043997  | 0.348922652 |
| cg15801340 |                                     | 4.34E-05    | 0.348917082 |
| cg01031101 | NKAPL                               | 0.001948248 | 0.348905101 |
| cg15912800 | MIR196B                             | 0.000290372 | 0.348888594 |
| cg10281002 | TBX5;TBX5                           | 0.000187194 | 0.34888434  |
| cg13448816 |                                     | 4.34E-05    | 0.348883059 |
| cg02161478 | OTX2OS1                             | 1.11E-05    | 0.348862417 |
| cg04481212 | BDNF;BDNF;BDNF;BDNF;BDNF            | 0.000233422 | 0.348857923 |
| cg21136104 |                                     | 0.000148457 | 0.348842375 |
| cg22847221 | CXCL2;CXCL2                         | 9.24E-05    | 0.348811947 |
| cg10742957 | FBXO17                              | 0.000791389 | 0.34880717  |
| cg03277049 |                                     | 0.000654035 | 0.348802258 |
| cg09881510 | PPFIA2;PPFIA2                       | 8.60E-06    | 0.348795055 |
| cg22152728 |                                     | 0.002714607 | 0.348770976 |
| cg02189888 |                                     | 5.59E-05    | 0.348760383 |
| cg04880732 | SLC24A4;SLC24A4;SLC24A4             | 0.000233422 | 0.348758083 |
| cg05161082 | C12orf39                            | 0.000290372 | 0.348744835 |
| cg03217897 | AGBL4                               | 2.58E-05    | 0.348737323 |
| cg17922851 | DZIP1;DZIP1                         | 4.34E-05    | 0.348733512 |
| cg08118344 | RAP1GAP;RAP1GAP;RAP1GAP             | 0.000290372 | 0.348716716 |
| cg09140778 |                                     | 1.96E-05    | 0.348716258 |
| cg03573529 |                                     | 8.60E-06    | 0.348713291 |
| cg00656387 | ENTPD3                              | 3.34E-05    | 0.348706708 |
| cg11440030 |                                     | 0.000187194 | 0.348704037 |
| cg08388041 |                                     | 0.000654035 | 0.348702893 |
| cg21956337 | NTRK3;NTRK3;NTRK3                   | 0.000117986 | 0.348643348 |
| cg25934680 | MYO1D                               | 8.60E-06    | 0.348635499 |
| cg21075680 |                                     | 0.001147425 | 0.348573691 |
| cg07068191 | HRASLS;HRASLS;MGC2889               | 1.96E-05    | 0.348573644 |
| cg04064160 |                                     | 4.34E-05    | 0.348568026 |

|            |                                 |             |             |
|------------|---------------------------------|-------------|-------------|
| cg25353171 |                                 | 1.96E-05    | 0.348554888 |
| cg02150654 | PPAPDC1A                        | 5.59E-05    | 0.348552478 |
| cg09384610 | RPH3A;RPH3A                     | 2.58E-05    | 0.348542622 |
| cg09628962 | CSPG4;CSPG4                     | 0.001147425 | 0.348536375 |
| cg04104463 | MIR124-2                        | 0.000187194 | 0.348529234 |
| cg21097036 | C6orf174                        | 1.96E-05    | 0.348515093 |
| cg13575139 |                                 | 0.000187194 | 0.34851274  |
| cg12329178 | SHISA2                          | 4.34E-05    | 0.348502993 |
| cg07642043 | GRIN2A;GRIN2A;GRIN2A            | 0.001948248 | 0.348488736 |
| cg07098391 | KDR                             | 2.58E-05    | 0.348476155 |
| cg14018735 | C9orf96                         | 5.59E-05    | 0.34846987  |
| cg08186924 | NPHS2                           | 1.50E-05    | 0.348466912 |
| cg18692678 | TBX5;TBX5;TBX5;TBX5             | 0.000654035 | 0.34845839  |
| cg21392341 | TBX15                           | 0.000955793 | 0.348448672 |
| cg27428551 | TMEM120B                        | 1.11E-05    | 0.348446982 |
| cg17368808 | C20orf103                       | 2.58E-05    | 0.348405265 |
| cg10385303 | SFTA3                           | 1.11E-05    | 0.348391372 |
| cg18839609 | PHYHIPL;PHYHIPL                 | 2.58E-05    | 0.348388985 |
| cg10384245 | ADCYAP1;ADCYAP1                 | 0.000290372 | 0.348373066 |
| cg18506390 | EBF2                            | 0.000187194 | 0.34837283  |
| cg06962944 | TOX2;TOX2;TOX2                  | 0.002714607 | 0.348365401 |
| cg25887069 | GALR3                           | 2.58E-05    | 0.348358756 |
| cg15906794 | YBX2                            | 0.000187194 | 0.348350073 |
| cg23690866 | SOX9                            | 0.001376172 | 0.348343434 |
| cg02004845 | CDH6                            | 2.58E-05    | 0.348328062 |
| cg24401219 | RIMS1                           | 8.60E-06    | 0.348305916 |
| cg22797735 | TBX3;TBX3                       | 5.59E-05    | 0.348298418 |
| cg11090352 | EPHA6                           | 0.000537905 | 0.348286369 |
| cg26312807 |                                 | 0.000117986 | 0.348282914 |
| cg05216056 | TRIM27                          | 1.96E-05    | 0.348278689 |
| cg16626012 | SLC47A1;SLC47A1                 | 0.000187194 | 0.348266753 |
| cg12997720 | HOXA11AS;HOXA11                 | 0.000570759 | 0.348266145 |
| cg03464573 | HOXA9                           | 5.59E-05    | 0.348253619 |
| cg02241330 | CCDC105                         | 1.11E-05    | 0.348241653 |
| cg12116137 | PRPF8                           | 4.34E-05    | 0.348236022 |
| cg09191036 | DRD5;DRD5                       | 0.000233422 | 0.348222408 |
| cg24795958 | ACTC1                           | 0.000187194 | 0.348209149 |
| cg00421139 | GDF6;GDF6                       | 0.000537905 | 0.348208657 |
| cg18319921 | ADAMTS19                        | 9.24E-05    | 0.348207347 |
| cg18391758 | GRIN2A;GRIN2A;GRIN2A            | 8.60E-06    | 0.348191839 |
| cg08431899 | EVX2                            | 3.34E-05    | 0.348190263 |
| cg03202077 | ADAMTS5;ADAMTS5                 | 4.34E-05    | 0.348173174 |
| cg10844844 | KCNK5                           | 9.24E-05    | 0.34815488  |
| cg08340737 |                                 | 2.58E-05    | 0.348146862 |
| cg02059626 |                                 | 1.96E-05    | 0.348086743 |
| cg18291941 | MIR663                          | 3.34E-05    | 0.348073359 |
| cg12026749 | NEFM;NEFM                       | 1.11E-05    | 0.348067308 |
| cg17105755 | C2orf65                         | 8.60E-06    | 0.348027592 |
| cg15215348 | PDE4C                           | 0.000654035 | 0.348023087 |
| cg13583934 | KCNK5                           | 0.00043997  | 0.3480141   |
| cg05335955 | AP3B2                           | 0.00043997  | 0.348013239 |
| cg06699564 |                                 | 0.000148457 | 0.34800254  |
| cg13217064 | SOX14                           | 0.000148457 | 0.347985222 |
| cg25975712 | FAM19A5;FAM19A5                 | 0.004357816 | 0.347984939 |
| cg09141953 |                                 | 0.000357885 | 0.347978893 |
| cg23922739 | HOXC13                          | 0.00043997  | 0.347978784 |
| cg03358769 | C3orf55;C3orf55;C3orf55;C3orf55 | 0.000148457 | 0.34797449  |
| cg04550737 | TBX15                           | 0.000654035 | 0.347972087 |
| cg08782002 | CCDC47                          | 1.50E-05    | 0.34796963  |
| cg27218796 | HAND2                           | 7.23E-05    | 0.347957239 |

|            |                                     |             |             |
|------------|-------------------------------------|-------------|-------------|
| cg20306837 | GRIA4;GRIA4;GRIA4;GRIA4             | 1.96E-05    | 0.347955382 |
| cg09069499 | PPP2R2A                             | 9.24E-05    | 0.347950863 |
| cg27316886 | PRMT8                               | 9.24E-05    | 0.34794806  |
| cg25241102 | HNMT;HNMT;HNMT;HNMT;HNMT;HNMT       | 0.001147425 | 0.347939949 |
| cg16404040 |                                     | 1.50E-05    | 0.347930397 |
| cg04003615 | RNF130                              | 0.000148457 | 0.347913724 |
| cg10748160 | JAKMIP1;JAKMIP1                     | 0.000290372 | 0.347903438 |
| cg25947544 | CADPS;CADPS;CADPS                   | 0.001147425 | 0.347896342 |
| cg11009245 | ALDH1L1                             | 7.23E-05    | 0.347861704 |
| cg26985666 | SLC1A2;SLC1A2                       | 0.001639597 | 0.347861221 |
| cg23936023 | VCAN;VCAN;VCAN;VCAN                 | 0.003734675 | 0.347847648 |
| cg09904383 | FCHSD1                              | 0.001948248 | 0.347844456 |
| cg12587766 | LIFR;LIFR;LIFR                      | 0.002714607 | 0.347844224 |
| cg04728429 |                                     | 9.24E-05    | 0.347822998 |
| cg06525651 | FAM196A;FAM196A;DOCK1               | 0.000537905 | 0.347815965 |
| cg07404921 | LHX8                                | 1.96E-05    | 0.347815826 |
| cg06668194 |                                     | 5.59E-05    | 0.347812429 |
| cg02174225 | JAM3                                | 9.24E-05    | 0.347793164 |
| cg23316253 |                                     | 0.000290372 | 0.347791713 |
| cg20027296 | TLX3                                | 0.000148457 | 0.347771523 |
| cg21772773 | CAMTA1                              | 4.34E-05    | 0.347768337 |
| cg01269620 | PDE10A;PDE10A                       | 4.34E-05    | 0.3477661   |
| cg08078028 | EIF3A                               | 1.11E-05    | 0.347756129 |
| cg11324504 | SLC16A8                             | 8.60E-06    | 0.347750944 |
| cg23300372 | CARTPT                              | 4.34E-05    | 0.347736898 |
| cg00036788 |                                     | 7.23E-05    | 0.347727045 |
| cg17076890 | PTF1A                               | 8.60E-06    | 0.347720659 |
| cg13964030 |                                     | 7.23E-05    | 0.347707682 |
| cg26734888 | HKR1                                | 0.000117986 | 0.347694222 |
| cg24440088 |                                     | 0.000148457 | 0.347683469 |
| cg08269974 | ELANE                               | 0.000233422 | 0.347681477 |
| cg20119148 | PDE4C                               | 0.000187194 | 0.347676672 |
| cg01568492 |                                     | 8.60E-06    | 0.347667832 |
| cg21870884 | GPR25                               | 8.60E-06    | 0.347640452 |
| cg07502389 | NEFM;NEFM                           | 8.60E-06    | 0.347639787 |
| cg21952901 | MAP1B                               | 0.001147425 | 0.347639239 |
| cg07734159 | VCL;VCL                             | 0.002304201 | 0.347628201 |
| cg26032119 | ZNF204P                             | 2.58E-05    | 0.347567696 |
| cg10499176 |                                     | 0.000955793 | 0.347565793 |
| cg11213383 | SH3GL2                              | 5.59E-05    | 0.347564622 |
| cg23034922 |                                     | 0.000233422 | 0.347552679 |
| cg03238298 | DTNA;DTNA;DTNA                      | 9.24E-05    | 0.347552056 |
| cg20954977 | B3GNT7                              | 0.000233422 | 0.34754927  |
| cg02232704 | MYO3A                               | 0.000654035 | 0.347540805 |
| cg24298421 | CASZ1;CASZ1                         | 5.59E-05    | 0.347522518 |
| cg22093640 |                                     | 0.000290372 | 0.34751819  |
| cg07960624 | SAMD12                              | 0.001147425 | 0.34751351  |
| cg17723958 | CCDC92                              | 2.58E-05    | 0.347511581 |
| cg03292388 | CPZ;CPZ;CPZ;CPZ;CPZ;CPZ             | 0.000654035 | 0.347507708 |
| cg18283342 | PCDHA6;PCDHA2;PCDHA1;PCDHA9;PCDHA7  | 0.000791389 | 0.347503046 |
| cg01463154 | BHLHE22                             | 0.000334462 | 0.347499193 |
| cg18405727 | TRIM71                              | 9.24E-05    | 0.347487273 |
| cg09744766 |                                     | 3.34E-05    | 0.347485669 |
| cg12285988 |                                     | 9.24E-05    | 0.347475423 |
| cg23448348 | RBP1;RBP1;RBP1                      | 9.24E-05    | 0.347428856 |
| cg12626956 | FOXB2                               | 8.60E-06    | 0.347421796 |
| cg26060489 |                                     | 8.60E-06    | 0.347417313 |
| cg21165221 |                                     | 8.60E-06    | 0.347414596 |
| cg15658793 | NFIC;NFIC                           | 2.58E-05    | 0.347369414 |
| cg13549719 | TRPC4;TRPC4;TRPC4;TRPC4;TRPC4;TRPC4 | 2.58E-05    | 0.347360754 |

|            |                               |             |             |
|------------|-------------------------------|-------------|-------------|
| cg08018585 | SIAH3                         | 0.004357816 | 0.347355302 |
| cg02000882 |                               | 0.000233422 | 0.347346305 |
| cg08194313 | GFRA1;GFRA1;GFRA1;GFRA1       | 0.000537905 | 0.347330834 |
| cg09926486 | FRMD5                         | 4.34E-05    | 0.347320758 |
| cg18944924 | FAM82A1                       | 0.00043997  | 0.347316832 |
| cg15711268 |                               | 0.001376172 | 0.347310459 |
| cg04751149 | MEIS1                         | 3.34E-05    | 0.347309155 |
| cg23693485 | GFOD1                         | 7.23E-05    | 0.347305947 |
| cg14222229 |                               | 7.23E-05    | 0.347305498 |
| cg10934870 | PCYOX1                        | 0.000187194 | 0.347272754 |
| cg02671880 |                               | 2.58E-05    | 0.347250076 |
| cg27506082 | ZDBF2                         | 0.000148457 | 0.347244049 |
| cg19568544 | PCDHB5;PCDHB5                 | 0.000117986 | 0.347240079 |
| cg01243371 | FOXF1                         | 5.59E-05    | 0.347231925 |
| cg13047308 | RAPSN;RAPSN                   | 3.34E-05    | 0.347203057 |
| cg12167830 | PRKAA2                        | 0.000117986 | 0.347195785 |
| cg17507671 | PITX2;PITX2;PITX2             | 3.34E-05    | 0.34719243  |
| cg08864944 | PBX1                          | 7.23E-05    | 0.347188136 |
| cg19949955 |                               | 0.000187194 | 0.347186798 |
| cg18534345 | PRLHR                         | 1.50E-05    | 0.34717256  |
| cg08195176 | SIK3                          | 1.50E-05    | 0.347169416 |
| cg07235053 | FUT4                          | 0.000148457 | 0.347144313 |
| cg08920610 | PCSK9;PCSK9                   | 9.24E-05    | 0.347137291 |
| cg03039218 | KIF18B                        | 0.000187194 | 0.347133224 |
| cg08866608 |                               | 4.34E-05    | 0.347103678 |
| cg07935012 | DCC                           | 1.11E-05    | 0.347100974 |
| cg22336669 |                               | 0.000233422 | 0.347099724 |
| cg07002711 | TTPA                          | 0.000117986 | 0.347098801 |
| cg01584932 | TTC31;TTC31;CCDC142           | 0.000233422 | 0.347089366 |
| cg07514505 | HS6ST3                        | 3.34E-05    | 0.347050963 |
| cg03041738 |                               | 1.50E-05    | 0.347048699 |
| cg11323198 | CDH8                          | 1.50E-05    | 0.347047709 |
| cg03294066 | C8orf42                       | 0.001948248 | 0.347040237 |
| cg18560204 | BNC1                          | 1.50E-05    | 0.347037444 |
| cg08876932 | PHOX2A                        | 0.000290372 | 0.347012322 |
| cg15087347 | CNTN1;CNTN1                   | 0.000290372 | 0.3470043   |
| cg18011401 | CACNA1A;CACNA1A               | 0.00043997  | 0.346993193 |
| cg09803262 | DLX6AS                        | 0.000290372 | 0.346989162 |
| cg01546729 | ZFPM2                         | 0.000537905 | 0.34697519  |
| cg24108286 | TFDP1;TFDP1                   | 2.58E-05    | 0.346971531 |
| cg21011139 | CYB5R2                        | 0.000233422 | 0.346965749 |
| cg09484039 | FRZB;FRZB                     | 7.23E-05    | 0.346961431 |
| cg04550052 | SALL1;SALL1;SALL1             | 0.004385436 | 0.346958338 |
| cg19848629 |                               | 0.000187194 | 0.346957928 |
| cg07142797 |                               | 0.000233422 | 0.346957366 |
| cg13331300 | KIAA1598;KIAA1598             | 5.59E-05    | 0.346949274 |
| cg14262681 |                               | 0.009456257 | 0.346948102 |
| cg26963356 | HMGCLL1;HMGCLL1               | 2.58E-05    | 0.346938514 |
| cg17621718 | CCK                           | 0.000955793 | 0.346937367 |
| cg27469154 | HSPB8;HSPB8                   | 0.004357816 | 0.346927408 |
| cg06298740 |                               | 0.004357816 | 0.346916595 |
| cg08287724 | KCNE1;KCNE1;KCNE1             | 1.11E-05    | 0.346890347 |
| cg06184647 |                               | 0.000791389 | 0.346886383 |
| cg25537434 |                               | 1.50E-05    | 0.346885673 |
| cg24650785 | BDNF;BDNF;BDNF;BDNF;BDNF;BDNF | 4.34E-05    | 0.34687735  |
| cg04873188 | MXD1                          | 0.004357816 | 0.346858703 |
| cg18395636 | RAB38                         | 0.000955793 | 0.346857853 |
| cg19969606 | LHX5                          | 4.34E-05    | 0.346855116 |
| cg09378756 | PCK2;PCK2                     | 0.000365373 | 0.34685452  |
| cg19592921 | BMP7;BMP7                     | 0.000117986 | 0.346847428 |

|            |                                    |             |             |
|------------|------------------------------------|-------------|-------------|
| cg01195276 |                                    | 0.00043997  | 0.346837897 |
| cg17663463 | PEG3;PEG3;ZIM2;PEG3;PEG3;ZIM2;ZIM2 | 8.60E-06    | 0.346829509 |
| cg02998333 |                                    | 2.58E-05    | 0.346810567 |
| cg10903903 |                                    | 0.000187194 | 0.346805397 |
| cg07178006 |                                    | 0.000117986 | 0.34679916  |
| cg20916535 | VGLL2;VGLL2                        | 0.000357885 | 0.346793515 |
| cg14380111 | C15orf26                           | 0.000357885 | 0.346792777 |
| cg10159215 | LPPR5;LPPR5                        | 5.59E-05    | 0.346763406 |
| cg24163242 |                                    | 0.000537905 | 0.346760534 |
| cg03585447 |                                    | 2.58E-05    | 0.346750649 |
| cg07363697 |                                    | 0.000791389 | 0.346744125 |
| cg00253658 |                                    | 0.004357816 | 0.346742112 |
| cg25707767 | RSPH10B;RSPH10B2                   | 8.60E-06    | 0.346732833 |
| cg07702424 |                                    | 2.58E-05    | 0.346730142 |
| cg08832227 | KCNA1                              | 0.000148457 | 0.346719685 |
| cg18574157 | CADPS2;CADPS2;CADPS2               | 0.000117986 | 0.346707313 |
| cg06335143 | ZYG11A                             | 8.60E-06    | 0.346701532 |
| cg27074174 | GRIK2;GRIK2;GRIK2                  | 0.000117986 | 0.346699953 |
| cg13713523 | RGS7BP                             | 2.58E-05    | 0.346689075 |
| cg08284213 |                                    | 0.000357885 | 0.34668639  |
| cg02778418 | ATOH1                              | 1.11E-05    | 0.346684934 |
| cg03723247 |                                    | 9.24E-05    | 0.346671261 |
| cg21106486 | CR1L                               | 7.23E-05    | 0.346662199 |
| cg13601427 | SUSD5                              | 0.000357885 | 0.346642418 |
| cg03774026 | FAM184A;FAM184A;FAM184A            | 0.000233422 | 0.346639309 |
| cg03456968 | WNT9B                              | 0.001147425 | 0.346632834 |
| cg10316635 | INADL                              | 0.000233422 | 0.346621851 |
| cg03449175 | HIST3H2BB;HIST3H2A;HIST3H2A        | 0.002304201 | 0.3466154   |
| cg14526718 |                                    | 4.34E-05    | 0.346599806 |
| cg08203253 |                                    | 9.24E-05    | 0.346594038 |
| cg11273478 | GABRB3;GABRB3                      | 2.58E-05    | 0.346590525 |
| cg00220721 | PRR5L;PRR5L;PRR5L;PRR5L            | 0.000148457 | 0.346564102 |
| cg25033393 |                                    | 4.34E-05    | 0.346563952 |
| cg01469864 | CPLX2;CPLX2                        | 4.34E-05    | 0.346538895 |
| cg26708235 | ATP8A2                             | 2.58E-05    | 0.346527256 |
| cg18875371 | C14orf23;C14orf23                  | 2.58E-05    | 0.346519559 |
| cg23693169 |                                    | 0.000117986 | 0.346518325 |
| cg24424545 | CNNM1                              | 7.23E-05    | 0.346510119 |
| cg11084334 | LHFPL4                             | 2.58E-05    | 0.346499466 |
| cg16436762 | PIWIL4                             | 0.002304201 | 0.346477404 |
| cg08474859 |                                    | 0.000233422 | 0.346471386 |
| cg10996596 |                                    | 7.23E-05    | 0.346471166 |
| cg00067018 | DBX2                               | 1.50E-05    | 0.346467878 |
| cg13720108 |                                    | 1.50E-05    | 0.346462878 |
| cg15493780 | PRLHR                              | 5.59E-05    | 0.346453257 |
| cg17100943 | SLC25A23                           | 0.000791389 | 0.346450896 |
| cg21809447 | OLFM3;OLFM3                        | 0.000110797 | 0.346436445 |
| cg23974944 | NOVA2                              | 1.50E-05    | 0.346433717 |
| cg08333333 | ZNF835                             | 5.59E-05    | 0.34642322  |
| cg01957732 | EYA4;EYA4;EYA4                     | 0.000187194 | 0.346420142 |
| cg03648789 | CYP1B1                             | 0.000955793 | 0.346415915 |
| cg24512138 | TF                                 | 1.96E-05    | 0.346414673 |
| cg26161329 | PPM1E                              | 5.59E-05    | 0.346406166 |
| cg24768649 | ERBB4;ERBB4                        | 1.11E-05    | 0.346395004 |
| cg02071076 | STOX2;STOX2                        | 2.58E-05    | 0.346390958 |
| cg11074047 | NFATC2;NFATC2;NFATC2               | 0.009066563 | 0.346373674 |
| cg23026675 | LOC100192378                       | 1.96E-05    | 0.346364977 |
| cg01673674 | GDF6                               | 4.34E-05    | 0.346361474 |
| cg23696618 | SERPINB10                          | 0.001639597 | 0.34635803  |
| cg25734726 | SERTAD3;SERTAD3;SERTAD3            | 0.000117986 | 0.34634429  |



|            |                                     |             |             |
|------------|-------------------------------------|-------------|-------------|
| cg05237436 | SIL1;SIL1                           | 0.000357885 | 0.346321318 |
| cg20837557 | RAB32                               | 0.000148457 | 0.346315247 |
| cg07622996 | FAM84A                              | 7.23E-05    | 0.346314455 |
| cg20203469 | ACAD8                               | 2.58E-05    | 0.34630629  |
| cg15473155 | PEG3;PEG3;ZIM2;PEG3;PEG3;ZIM2;ZIM2  | 8.60E-06    | 0.346303754 |
| cg13215970 | CXCL5                               | 3.34E-05    | 0.346303293 |
| cg14761318 | OCLN;OCLN                           | 0.000290372 | 0.346297035 |
| cg23667734 |                                     | 0.000233422 | 0.346286203 |
| cg02788090 | SOX9                                | 0.000233422 | 0.346285219 |
| cg06883496 |                                     | 1.96E-05    | 0.346267523 |
| cg17356733 | IFNGR2                              | 0.000791389 | 0.346263377 |
| cg19544372 | ZNF560                              | 5.59E-05    | 0.346222964 |
| cg17900495 | NHLH2;NHLH2                         | 4.34E-05    | 0.346211831 |
| cg07079231 | DNAH3;TMEM159                       | 7.23E-05    | 0.346188889 |
| cg14319409 | GLRA1;GLRA1                         | 0.000148457 | 0.346180676 |
| cg07102705 | HTR4;HTR4;HTR4;HTR4;HTR4;HTR4;HTR4  | 0.000233422 | 0.346180072 |
| cg15606473 |                                     | 0.000791389 | 0.346172683 |
| cg11705975 | PRLHR                               | 1.96E-05    | 0.346145287 |
| cg01202197 | FADS6                               | 2.58E-05    | 0.346143724 |
| cg02136596 | ATAD3C                              | 1.96E-05    | 0.346136881 |
| cg10521638 | CXCL1                               | 8.60E-06    | 0.346082363 |
| cg23237183 | NOTO;NOTO                           | 0.000187194 | 0.346081978 |
| cg24228329 | CHST9                               | 8.60E-06    | 0.346078991 |
| cg12026729 | LOC100192426;PTPRM;PTPRM            | 0.000357885 | 0.346066757 |
| cg01085837 |                                     | 0.000654035 | 0.346014369 |
| cg26381364 | C12orf42;C12orf42                   | 0.001948248 | 0.345994043 |
| cg20691140 |                                     | 0.00043997  | 0.345993727 |
| cg07923686 | BHLHE22;LOC401463                   | 3.34E-05    | 0.345980159 |
| cg22574802 | FGF10                               | 0.000148457 | 0.345952894 |
| cg10283958 | KDELC1;BIVM;KDELC1;BIVM             | 7.23E-05    | 0.345946225 |
| cg06353428 | MARVELD3;MARVELD3;MARVELD3;MARVELD3 | 9.24E-05    | 0.345945747 |
| cg22755445 | IL1R1                               | 2.58E-05    | 0.345941752 |
| cg01535080 |                                     | 8.60E-06    | 0.345939851 |
| cg12864853 | TPBG;TPBG;TPBG                      | 0.000148457 | 0.345939689 |
| cg15270892 | EOMES                               | 0.000148457 | 0.34592128  |
| cg08235864 | IRX2;IRX2;C5orf38                   | 0.003734675 | 0.345909836 |
| cg01737026 | GRIK2;GRIK2;GRIK2                   | 0.000148457 | 0.345905339 |
| cg06593258 | OSBPL1A;OSBPL1A                     | 0.0050758   | 0.345903898 |
| cg08582701 | A2BP1;A2BP1                         | 8.60E-06    | 0.345881219 |
| cg12610207 | TBX5;TBX5;TBX5;TBX5                 | 0.000357885 | 0.345878879 |
| cg08664487 | BEND6;DST                           | 0.000290372 | 0.345863627 |
| cg01461824 |                                     | 2.58E-05    | 0.345859322 |
| cg10762882 |                                     | 0.000357885 | 0.345856198 |
| cg01428589 | RGS9BP                              | 0.000955793 | 0.345824798 |
| cg07809484 |                                     | 5.59E-05    | 0.345821088 |
| cg04361551 |                                     | 0.001376172 | 0.34578528  |
| cg17310600 | MARCH1                              | 1.11E-05    | 0.345780464 |
| cg21296676 | EYA4;EYA4;EYA4                      | 0.000148457 | 0.345775176 |
| cg05707714 |                                     | 0.000117986 | 0.345762757 |
| cg16620526 | LVRN                                | 9.24E-05    | 0.345762662 |
| cg10529075 | NPAS2                               | 0.00043997  | 0.345762304 |
| cg14445366 |                                     | 4.34E-05    | 0.345761815 |
| cg11537406 | SLC37A2;SLC37A2                     | 1.96E-05    | 0.34574592  |
| cg01479187 |                                     | 0.000791389 | 0.34573322  |
| cg16922058 | RAD21L1                             | 9.24E-05    | 0.345724089 |
| cg06018401 | MAP1B                               | 0.000187194 | 0.345722449 |
| cg13419390 | FAM123C;FAM123C;FAM123C;FAM123C     | 4.34E-05    | 0.345708746 |
| cg27619291 | TRPA1                               | 9.24E-05    | 0.345688227 |
| cg00053393 | MGC45800                            | 8.60E-06    | 0.345686931 |
| cg16173191 |                                     | 4.34E-05    | 0.345674427 |

|            |                                              |             |             |
|------------|----------------------------------------------|-------------|-------------|
| cg16452678 | ANKRD5;ANKRD5                                | 0.001147425 | 0.345668157 |
| cg19761480 | PPP2R3A                                      | 4.34E-05    | 0.345650507 |
| cg05062612 | WSCD2                                        | 0.000654035 | 0.345648265 |
| cg16256390 | BCL11B;BCL11B                                | 0.003189589 | 0.345640894 |
| cg11848173 | CD63;CD63                                    | 0.000357885 | 0.345640414 |
| cg18624636 | SLC16A12                                     | 0.000791389 | 0.345638862 |
| cg04157263 |                                              | 3.34E-05    | 0.345636556 |
| cg02816003 | RFX6                                         | 1.96E-05    | 0.345631039 |
| cg10874314 | PTPRE                                        | 3.34E-05    | 0.345619428 |
| cg16999254 | RGR;RGR;RGR                                  | 9.24E-05    | 0.345605167 |
| cg06870213 | HMGCLL1;HMGCLL1                              | 5.59E-05    | 0.34557991  |
| cg13276306 | ANGPT1                                       | 4.34E-05    | 0.345576954 |
| cg05499148 |                                              | 2.58E-05    | 0.345548634 |
| cg00840960 | HTR4;HTR4;HTR4;HTR4;HTR4;HTR4;HTR4           | 0.000654035 | 0.345529236 |
| cg04622802 | FIBIN;FIBIN                                  | 2.58E-05    | 0.345527053 |
| cg20038996 |                                              | 1.50E-05    | 0.345510109 |
| cg11146691 | SLC38A4;SLC38A4;SLC38A4;SLC38A4              | 0.001147425 | 0.345493434 |
| cg03669797 |                                              | 0.000290372 | 0.345493265 |
| cg19744587 | IL17RB;CHDH;CHDH                             | 0.000117986 | 0.345481614 |
| cg21735068 | PGCP                                         | 4.34E-05    | 0.345468491 |
| cg01172640 |                                              | 0.000117986 | 0.345465376 |
| cg27146050 | HIF3A;HIF3A                                  | 1.96E-05    | 0.345447226 |
| cg08023265 |                                              | 1.11E-05    | 0.345445081 |
| cg02273846 | C14orf23;C14orf23                            | 0.000148457 | 0.345441879 |
| cg21144928 |                                              | 3.34E-05    | 0.345437291 |
| cg05644602 | C2orf65                                      | 1.96E-05    | 0.345428189 |
| cg00192026 |                                              | 1.18E-05    | 0.345426048 |
| cg06154313 | RBP4                                         | 1.11E-05    | 0.345417447 |
| cg09885622 | LPCAT1                                       | 0.003734675 | 0.345403125 |
| cg12457773 | NRSN1;NRSN1                                  | 8.60E-06    | 0.345397214 |
| cg01014615 | HOXD3                                        | 2.58E-05    | 0.34538682  |
| cg06558014 |                                              | 0.00043997  | 0.345384365 |
| cg13729210 |                                              | 0.002304201 | 0.3453467   |
| cg16197717 | CPXM2                                        | 8.60E-06    | 0.345340016 |
| cg08322034 | ELOVL4                                       | 3.34E-05    | 0.345331029 |
| cg14901671 |                                              | 8.60E-06    | 0.345322797 |
| cg04832767 | DLX6AS                                       | 0.000791389 | 0.345319981 |
| cg09721739 | NMNAT3                                       | 0.002714607 | 0.345312447 |
| cg01394781 | ABCC1;ABCC1;ABCC1;ABCC1;ABCC1                | 0.000290372 | 0.345300368 |
| cg24100636 | PRMT8                                        | 0.000290372 | 0.345297014 |
| cg09663111 | C20orf85                                     | 4.34E-05    | 0.34527416  |
| cg18371769 | PCDHGB4;PCDHGA4;PCDHGA6;PCDHGA1;PCDHGA1      | 0.000537905 | 0.34523325  |
| cg15997906 | FAM183A                                      | 7.23E-05    | 0.345226135 |
| cg06166242 | SASH1                                        | 4.34E-05    | 0.345225702 |
| cg02386859 | CPE                                          | 8.60E-06    | 0.345225047 |
| cg05613447 | GPR120                                       | 2.58E-05    | 0.345198007 |
| cg00048832 | GABRA1;GABRA1;GABRA1;GABRA1;GABRA1           | 4.34E-05    | 0.345183783 |
| cg11542086 | IL7                                          | 5.59E-05    | 0.345166391 |
| cg01968493 | ZNF804A                                      | 5.59E-05    | 0.345165027 |
| cg27174108 | C19orf33;YIF1B;YIF1B;YIF1B;YIF1B;YIF1B;YIF1B | 1.50E-05    | 0.345156181 |
| cg12560527 | LOC222699                                    | 9.24E-05    | 0.345136496 |
| cg04101351 | PDE3A                                        | 3.34E-05    | 0.345135697 |
| cg05954120 | TMEM79;TMEM79                                | 0.000148457 | 0.345132467 |
| cg08557970 | RPS6KA2;RPS6KA2                              | 0.000357885 | 0.345097838 |
| cg08628635 | E2F3                                         | 0.001948248 | 0.345089163 |
| cg00725089 |                                              | 2.58E-05    | 0.345083924 |
| cg25741452 | KITLG;KITLG;KITLG;KITLG                      | 2.58E-05    | 0.345068536 |
| cg20557801 | LBXCOR1                                      | 4.34E-05    | 0.345062548 |
| cg19155932 | C20orf85                                     | 3.34E-05    | 0.345050227 |
| cg08737836 | DPYSL3                                       | 7.23E-05    | 0.345042553 |

|            |                             |             |             |
|------------|-----------------------------|-------------|-------------|
| cg21071896 | AP3B2                       | 4.34E-05    | 0.345012383 |
| cg26000554 | MOSC2                       | 0.0050758   | 0.344999654 |
| cg24697460 | NCOR2;NCOR2                 | 1.50E-05    | 0.344996638 |
| cg19005485 | BDH1;BDH1;BDH1              | 0.000117986 | 0.344988244 |
| cg13848598 | ADRB1                       | 1.11E-05    | 0.344982853 |
| cg01759136 |                             | 1.96E-05    | 0.344955332 |
| cg00673286 | AP3B2                       | 2.58E-05    | 0.344937033 |
| cg19593767 | TOX2;TOX2;TOX2              | 4.34E-05    | 0.344926819 |
| cg14542554 |                             | 7.23E-05    | 0.344916757 |
| cg01872077 | CYP27A1                     | 0.000187194 | 0.344916361 |
| cg26647139 | CADM1;CADM1                 | 1.96E-05    | 0.344901712 |
| cg15345206 |                             | 1.11E-05    | 0.34489983  |
| cg25043129 | BAIAP2;BAIAP2;BAIAP2;BAIAP2 | 2.58E-05    | 0.34489962  |
| cg08952844 |                             | 1.11E-05    | 0.344899207 |
| cg01066472 |                             | 0.000233422 | 0.344886513 |
| cg00155310 | TFAP2B                      | 0.000148457 | 0.344871433 |
| cg14236735 |                             | 0.000187194 | 0.34486765  |
| cg10367023 |                             | 0.00043997  | 0.344839165 |
| cg07104652 | LPHN2                       | 7.23E-05    | 0.344819666 |
| cg11881754 | SRRM3                       | 7.23E-05    | 0.344805368 |
| cg14921939 | MATN4;MATN4;RBPJL;MATN4     | 1.96E-05    | 0.344804165 |
| cg17381377 | ABCC8                       | 9.24E-05    | 0.344780142 |
| cg04002794 | FNDC3B;FNDC3B               | 0.000654035 | 0.344777627 |
| cg17609931 |                             | 0.000148457 | 0.344747879 |
| cg19708803 |                             | 7.23E-05    | 0.34474482  |
| cg21406075 |                             | 3.34E-05    | 0.344740757 |
| cg09130288 | PMP22;PMP22                 | 1.96E-05    | 0.344730111 |
| cg00419314 | CXCL1                       | 2.80E-05    | 0.344719707 |
| cg14311670 | SOX2OT                      | 0.000290372 | 0.344717139 |
| cg00030774 | FAM189A1                    | 3.34E-05    | 0.344715968 |
| cg04105282 | CRTAC1                      | 0.000290372 | 0.344712588 |
| cg05255811 | KCNK5                       | 0.000357885 | 0.344700975 |
| cg11626496 |                             | 1.11E-05    | 0.344688581 |
| cg02067405 | SCNN1G                      | 0.000654035 | 0.344683958 |
| cg20925233 | NXPH3                       | 0.002304201 | 0.344681724 |
| cg13321166 | MS4A3;MS4A3;MS4A3           | 0.000117986 | 0.344667395 |
| cg16406892 | TBX3;TBX3                   | 0.002714607 | 0.344659074 |
| cg23500059 | CNTN1;CNTN1                 | 0.000148457 | 0.344649707 |
| cg12942414 | EPCAM                       | 0.000148457 | 0.344648033 |
| cg18366209 | CLVS2                       | 1.11E-05    | 0.344640146 |
| cg04066885 | SH3BP4                      | 2.58E-05    | 0.34464008  |
| cg05118482 | SCNN1G                      | 0.000537905 | 0.344630042 |
| cg18446336 | GNA12                       | 0.00043997  | 0.344619972 |
| cg17266282 |                             | 0.006823935 | 0.344619104 |
| cg23478547 |                             | 2.58E-05    | 0.344615325 |
| cg09746494 |                             | 8.60E-06    | 0.344598759 |
| cg16583552 | PCDHB7                      | 1.50E-05    | 0.344592331 |
| cg00736299 | MGRN1;MGRN1;MGRN1;MGRN1     | 1.96E-05    | 0.344581425 |
| cg04897804 | SOX30;SOX30                 | 8.60E-06    | 0.344565027 |
| cg22199216 |                             | 0.000537905 | 0.344561843 |
| cg14214262 | TBX5;TBX5;TBX5;TBX5         | 0.000148457 | 0.344559944 |
| cg03771840 | TRIM15                      | 0.000187194 | 0.344557127 |
| cg11511443 | LMO3                        | 3.34E-05    | 0.344550767 |
| cg05485137 | MKX                         | 0.000654035 | 0.344542349 |
| cg10722226 |                             | 1.50E-05    | 0.344534476 |
| cg04955573 | GFI1;GFI1;GFI1              | 5.59E-05    | 0.344510869 |
| cg23123250 | SPNS2                       | 0.000654035 | 0.344490392 |
| cg15184602 | FEZ1;FEZ1                   | 0.000955793 | 0.344489391 |
| cg24882875 | HS6ST3                      | 4.34E-05    | 0.344481604 |
| cg03224572 | GDF6                        | 0.000148457 | 0.344474956 |

|            |                                      |             |             |
|------------|--------------------------------------|-------------|-------------|
| cg26933866 |                                      | 4.34E-05    | 0.34447147  |
| cg22065923 |                                      | 8.60E-06    | 0.344462441 |
| cg06119894 | GRIA4;GRIA4;GRIA4;GRIA4              | 0.000791389 | 0.344449407 |
| cg05213896 | IL4I1;IL4I1                          | 0.000955793 | 0.344445215 |
| cg10126181 | FLJ22536                             | 0.002714607 | 0.344428148 |
| cg21471199 | ALDH4A1;ALDH4A1;ALDH4A1              | 0.002714607 | 0.344420616 |
| cg04064644 |                                      | 5.59E-05    | 0.344412534 |
| cg08159291 | AJAP1;AJAP1                          | 0.000955793 | 0.344408465 |
| cg18161890 | KRT72;KRT72;KRT72;KRT72;KRT72;KRT72  | 3.34E-05    | 0.344384916 |
| cg06423617 |                                      | 1.50E-05    | 0.344365768 |
| cg07003920 |                                      | 0.000290372 | 0.344359941 |
| cg01435344 | GOLGA7B                              | 0.000357885 | 0.344321694 |
| cg26584545 | NTN4                                 | 2.58E-05    | 0.34431192  |
| cg03309393 |                                      | 0.000233422 | 0.34430813  |
| cg18092314 | ROR1;ROR1                            | 0.001376172 | 0.344279533 |
| cg02807859 |                                      | 0.000187194 | 0.344254335 |
| cg11869862 |                                      | 8.60E-06    | 0.344245286 |
| cg03865648 |                                      | 0.000705485 | 0.344229056 |
| cg05669418 |                                      | 3.34E-05    | 0.344225855 |
| cg13984330 |                                      | 2.58E-05    | 0.344209552 |
| cg16102040 | ZNF827                               | 3.34E-05    | 0.344204953 |
| cg24873464 |                                      | 1.50E-05    | 0.344200475 |
| cg24694675 |                                      | 0.000117986 | 0.344199671 |
| cg06241792 | C12orf39                             | 0.003189589 | 0.344173069 |
| cg26534938 |                                      | 5.59E-05    | 0.344169206 |
| cg05477834 | PCDHB17                              | 7.23E-05    | 0.344157742 |
| cg26886462 |                                      | 1.50E-05    | 0.344149844 |
| cg07067241 | TRPC1                                | 0.000791389 | 0.344135298 |
| cg18661205 | PCDHB18                              | 0.000791389 | 0.344130539 |
| cg05684528 |                                      | 0.001147425 | 0.344110953 |
| cg22322562 | NRXN1;NRXN1;NRXN1                    | 7.23E-05    | 0.344098608 |
| cg23114616 | TNFRSF25;PLEKHG5;TNFRSF25;PLEKHG5;PL | 0.000290372 | 0.344095523 |
| cg19448837 | MAPK4                                | 0.000290372 | 0.344082104 |
| cg03970229 | MTNR1B                               | 4.34E-05    | 0.344066735 |
| cg07094915 |                                      | 0.002714607 | 0.344058309 |
| cg02895639 | FAM19A5;FAM19A5                      | 0.007873393 | 0.344052187 |
| cg24531255 | TFPI2;TFPI2                          | 0.000357885 | 0.344046789 |
| cg22751696 | C3orf14                              | 0.000117986 | 0.344032861 |
| cg10989634 |                                      | 1.11E-05    | 0.344023545 |
| cg18007463 | TLL1                                 | 5.59E-05    | 0.344016618 |
| cg04508482 | IDUA                                 | 0.000537905 | 0.344002214 |
| cg23374700 | PARD6G                               | 0.000791389 | 0.343998043 |
| cg02818189 |                                      | 0.000290372 | 0.343977273 |
| cg22346476 |                                      | 0.000233422 | 0.343973968 |
| cg15278109 |                                      | 5.59E-05    | 0.343972313 |
| cg04553838 | TRPC6                                | 0.000117986 | 0.343940394 |
| cg00347620 | TBX3;TBX3                            | 8.60E-06    | 0.343937714 |
| cg09285795 |                                      | 1.11E-05    | 0.343924022 |
| cg18566984 | PACRG;PACRG;PARK2;PARK2;PACRG;PARK   | 0.000233422 | 0.343919125 |
| cg26233331 | S100P;S100P                          | 0.000187194 | 0.343907385 |
| cg06369992 |                                      | 1.50E-05    | 0.343889469 |
| cg00360414 | TMEM26                               | 5.59E-05    | 0.343886099 |
| cg16783744 | DPYS                                 | 0.000290372 | 0.343878114 |
| cg20232102 | PPP1R14A                             | 1.11E-05    | 0.343849134 |
| cg21477176 | CACNG7                               | 8.60E-06    | 0.343834444 |
| cg23267550 | RAB32                                | 0.000233422 | 0.343823026 |
| cg02239862 | SUSD5                                | 0.000654035 | 0.343822556 |
| cg23839136 | WBSCR17                              | 7.23E-05    | 0.34382226  |
| cg07241568 | ABO                                  | 3.34E-05    | 0.3438137   |
| cg05490712 | PAX6                                 | 0.000117986 | 0.343778041 |

|            |                                      |             |             |
|------------|--------------------------------------|-------------|-------------|
| cg20498859 | GPR149                               | 7.23E-05    | 0.343775947 |
| cg11509341 | FAM176A;FAM176A;FAM176A              | 0.000290372 | 0.343757714 |
| cg03960951 | RFX4                                 | 3.34E-05    | 0.343742744 |
| cg13974394 | IRX4                                 | 4.34E-05    | 0.343730304 |
| cg12796028 |                                      | 0.000148457 | 0.343726716 |
| cg12994228 |                                      | 0.00043997  | 0.343711485 |
| cg13740339 | FBP1;FBP1                            | 5.59E-05    | 0.343674408 |
| cg24926361 | GSC2                                 | 8.60E-06    | 0.343673102 |
| cg10780164 | CALY                                 | 9.24E-05    | 0.343669167 |
| cg16714055 | GATA5                                | 0.00156564  | 0.343639779 |
| cg04739123 |                                      | 0.000187194 | 0.343638526 |
| cg03614916 | IMPACT                               | 0.00043997  | 0.343636641 |
| cg05885936 |                                      | 9.24E-05    | 0.343630619 |
| cg07953890 | MACROD2                              | 0.00043997  | 0.343630411 |
| cg08217024 | MDGA2                                | 0.0050758   | 0.343630349 |
| cg00065215 | PAX7;PAX7;PAX7                       | 0.000866489 | 0.343629315 |
| cg07194093 | PTPRM;PTPRM                          | 0.000357885 | 0.343626931 |
| cg13729816 |                                      | 1.50E-05    | 0.343626331 |
| cg15000232 | PNPLA3                               | 4.34E-05    | 0.343620595 |
| cg07701191 | RORA                                 | 0.000117986 | 0.343614868 |
| cg21586152 | ELANE                                | 4.34E-05    | 0.343611087 |
| cg15353031 | C10orf53;C10orf53                    | 8.60E-06    | 0.343606662 |
| cg16585651 |                                      | 0.001376172 | 0.343599305 |
| cg12129117 | CAPN2;CAPN2                          | 0.000117986 | 0.343596829 |
| cg00114029 | DLGAP3                               | 0.000158823 | 0.343592177 |
| cg09643312 | CD302                                | 0.004357816 | 0.343576099 |
| cg02291010 | CAST;CAST;CAST;CAST;CAST;CAST;CAST;C | 2.58E-05    | 0.343550015 |
| cg24921943 | SH3PXD2B                             | 0.002304201 | 0.343548637 |
| cg00707317 | NMNAT2;NMNAT2                        | 9.24E-05    | 0.343535998 |
| cg14415816 | RFX4                                 | 1.50E-05    | 0.343503341 |
| cg17873451 | LOC440925;SP5                        | 0.000187194 | 0.343484004 |
| cg06995920 | DPY19L2                              | 0.000233422 | 0.343462571 |
| cg03875330 | TMEM205;TMEM205;CCDC159;TMEM205      | 0.000148457 | 0.343460744 |
| cg26278103 | GPR37                                | 1.96E-05    | 0.34346057  |
| cg14475702 | KLF4                                 | 7.23E-05    | 0.343448866 |
| cg23514532 | SLC2A10                              | 0.000187194 | 0.343404631 |
| cg24374583 | MOSC1                                | 0.000233422 | 0.343393408 |
| cg26356061 | ZNF418                               | 8.60E-06    | 0.343386754 |
| cg17307442 | EMX2;EMX2;EMX2OS;EMX2;EMX2           | 0.001393182 | 0.343356112 |
| cg10767045 | MINPP1                               | 9.24E-05    | 0.343349682 |
| cg02605760 | NSUN5;NSUN5;NSUN5;NSUN5              | 7.23E-05    | 0.343346858 |
| cg19513582 | UBE2H;UBE2H                          | 7.23E-05    | 0.343346031 |
| cg07234958 | GPC6                                 | 0.000148457 | 0.3433365   |
| cg14176752 |                                      | 8.60E-06    | 0.343334124 |
| cg00960305 | C20orf56                             | 0.002714607 | 0.343315686 |
| cg08691235 | TTN;TTN;TTN;MIR548N;TTN              | 3.34E-05    | 0.343311893 |
| cg09745243 | CXCL2                                | 0.001948248 | 0.343298257 |
| cg16260421 | AGBL4                                | 8.60E-06    | 0.34329757  |
| cg14470895 | CDO1                                 | 4.34E-05    | 0.343293018 |
| cg03203197 |                                      | 0.000117986 | 0.343290422 |
| cg18297437 | ZIC1                                 | 0.00043997  | 0.343288271 |
| cg25137687 | CXCL3                                | 0.000537905 | 0.343279818 |
| cg16146177 |                                      | 0.000148457 | 0.343253757 |
| cg02288301 | TMEFF2                               | 7.23E-05    | 0.343250837 |
| cg16422316 | AP1G1;AP1G1                          | 0.000117986 | 0.34323733  |
| cg13427361 |                                      | 9.24E-05    | 0.343234729 |
| cg07202413 |                                      | 2.58E-05    | 0.343234378 |
| cg20386580 | NEURL                                | 8.60E-06    | 0.343229946 |
| cg09698548 | CA8                                  | 0.000955793 | 0.343227806 |
| cg01272400 | GPR120                               | 0.000357885 | 0.343222568 |

|            |                                         |             |             |
|------------|-----------------------------------------|-------------|-------------|
| cg11166759 |                                         | 0.000357885 | 0.343194773 |
| cg17097923 | FBXO39                                  | 5.59E-05    | 0.343191045 |
| cg26934243 | LRIG3;LRIG3                             | 8.60E-06    | 0.343184585 |
| cg08805144 | CACNA2D3                                | 0.001147425 | 0.3431797   |
| cg02044223 |                                         | 0.000148457 | 0.343160618 |
| cg04209913 | GDNF;GDNF;GDNF                          | 0.006738759 | 0.343156586 |
| cg04882233 |                                         | 0.000955793 | 0.343153932 |
| cg16844053 | CUL1                                    | 0.000187194 | 0.343153191 |
| cg05463966 | NDUFS8                                  | 4.34E-05    | 0.343126179 |
| cg02793099 | PEG3;PEG3;ZIM2;PEG3;PEG3;ZIM2;ZIM2      | 1.11E-05    | 0.343125398 |
| cg01719210 | VAX2                                    | 0.000187194 | 0.343119933 |
| cg22793735 | PLOD2;PLOD2                             | 0.000357885 | 0.343117453 |
| cg18010131 | AMPD3;AMPD3;AMPD3                       | 4.34E-05    | 0.343104885 |
| cg21806015 | NXPH1                                   | 4.34E-05    | 0.34310429  |
| cg08292467 | PCDHGA4;PCDHGA6;PCDHGA9;PCDHGA1;PCDHGA1 | 4.34E-05    | 0.343091312 |
| cg21390624 | EYA4;EYA4;EYA4                          | 0.000233422 | 0.343091022 |
| cg14795750 | PCDH10;PCDH10;PCDH10;PCDH10             | 1.11E-05    | 0.343087666 |
| cg17977173 | HS6ST1                                  | 8.60E-06    | 0.343058195 |
| cg12281565 | ERBB4;ERBB4                             | 1.50E-05    | 0.343048402 |
| cg22488158 | WDR63;WDR63                             | 1.96E-05    | 0.343042452 |
| cg04831327 | RBM19;RBM19;RBM19                       | 0.000233422 | 0.34299397  |
| cg02705835 | CCDC71                                  | 0.007873393 | 0.342989305 |
| cg04239994 | HRNBP3                                  | 0.000233422 | 0.342988109 |
| cg00105628 |                                         | 2.58E-05    | 0.342968097 |
| cg15250797 | SCTR                                    | 1.11E-05    | 0.342964435 |
| cg09571713 | SPOCK3;SPOCK3                           | 1.50E-05    | 0.342951079 |
| cg02112168 | PRPF39;SNORD127                         | 4.34E-05    | 0.342947156 |
| cg02304370 | PHRF1                                   | 7.23E-05    | 0.342938644 |
| cg22459739 | PCDHA2;PCDHA1;PCDHA1;PCDHA3;PCDHA4      | 7.23E-05    | 0.342930812 |
| cg18026588 | GABRB3;GABRB3                           | 4.34E-05    | 0.342929603 |
| cg26220018 |                                         | 0.002714607 | 0.342929399 |
| cg02583151 | SIX1                                    | 1.11E-05    | 0.342923302 |
| cg13875133 | PAPPA                                   | 4.34E-05    | 0.342912061 |
| cg25632105 | CHRM2;CHRM2;CHRM2;CHRM2;CHRM2;CHRM2     | 9.24E-05    | 0.342904631 |
| cg18929903 | ENTPD7                                  | 0.000187194 | 0.342883229 |
| cg12746356 | HTRA1                                   | 0.000537905 | 0.342832246 |
| cg13675859 | GPR110;GPR110                           | 0.001948248 | 0.342823166 |
| cg20541656 | LAPTM4B                                 | 2.58E-05    | 0.34281586  |
| cg04906989 | C17orf102;TMEM132E                      | 0.000654035 | 0.342813118 |
| cg03104428 | OLFM3                                   | 0.001376172 | 0.342799372 |
| cg10899768 | GRHL2                                   | 0.000654035 | 0.342790237 |
| cg13544851 | DPP6;DPP6;DPP6;DPP6                     | 8.60E-06    | 0.342787454 |
| cg05722504 | PHOX2B                                  | 1.96E-05    | 0.342774725 |
| cg10111115 | PDZRN3                                  | 3.34E-05    | 0.342767759 |
| cg18397975 | AMACR;AMACR;AMACR;AMACR;AMACR;AMACR     | 1.50E-05    | 0.342766521 |
| cg11808581 | GABRD                                   | 0.001948248 | 0.342741421 |
| cg06410191 | LVRN                                    | 1.50E-05    | 0.342736117 |
| cg17496659 | TP73                                    | 0.000233422 | 0.342728879 |
| cg26351229 | ADCY8                                   | 1.11E-05    | 0.342720654 |
| cg10364040 | HOXD10                                  | 0.000654035 | 0.342705092 |
| cg00714740 |                                         | 0.000187194 | 0.342690361 |
| cg27106513 | RGS20                                   | 0.000187194 | 0.342683466 |
| cg14234426 |                                         | 4.34E-05    | 0.342671457 |
| cg15120341 | TFDP1;TFDP1                             | 4.34E-05    | 0.342660672 |
| cg18587476 | C2orf84                                 | 4.34E-05    | 0.342659469 |
| cg06740950 | FNDC3B;FNDC3B                           | 0.000187194 | 0.342648696 |
| cg19676182 | CCDC149;CCDC149                         | 0.003189589 | 0.3426251   |
| cg19496491 | TEAD1                                   | 0.002304201 | 0.342618039 |
| cg08317058 |                                         | 2.58E-05    | 0.342616924 |
| cg18261205 |                                         | 0.000187194 | 0.342590515 |

|            |                                     |             |             |
|------------|-------------------------------------|-------------|-------------|
| cg01405761 | CLVS1;CLVS1                         | 1.50E-05    | 0.342573088 |
| cg16945312 | FOXF2                               | 0.000187194 | 0.342572516 |
| cg24874180 | DKK2                                | 2.58E-05    | 0.342571506 |
| cg22758454 |                                     | 5.59E-05    | 0.342568504 |
| cg03352189 | CCDC36;CCDC36                       | 2.58E-05    | 0.342552034 |
| cg21454485 | CD84                                | 0.009066563 | 0.342543099 |
| cg06271970 |                                     | 7.23E-05    | 0.342529335 |
| cg27107171 | PRR16                               | 0.004357816 | 0.342525171 |
| cg21733531 |                                     | 4.34E-05    | 0.342515754 |
| cg16976662 | PLCE1                               | 1.50E-05    | 0.342476336 |
| cg22511947 | FN1;FN1;FN1;FN1;FN1;FN1;FN1         | 1.96E-05    | 0.342465994 |
| cg14866863 |                                     | 6.94E-05    | 0.34245809  |
| cg00735923 | CFTR                                | 0.000122184 | 0.342456976 |
| cg25005894 | ERC2                                | 0.000187194 | 0.342455217 |
| cg18834712 |                                     | 1.11E-05    | 0.34244956  |
| cg15373239 | EMX2OS;EMX2;EMX2                    | 1.96E-05    | 0.342442684 |
| cg26928418 | ZNF578                              | 0.000233422 | 0.34243691  |
| cg12078031 | ADAMTS5                             | 8.60E-06    | 0.342386481 |
| cg19300568 | NAT8L                               | 1.50E-05    | 0.342385701 |
| cg01787285 | SKI                                 | 0.0050758   | 0.342383088 |
| cg13794530 | VIPR2;VIPR2                         | 0.004357816 | 0.342378855 |
| cg08151596 |                                     | 2.58E-05    | 0.342375516 |
| cg06319822 | HBM                                 | 0.000290372 | 0.342339794 |
| cg25605545 |                                     | 9.24E-05    | 0.342331108 |
| cg17154729 | UTP23                               | 0.000537905 | 0.342319336 |
| cg27595860 | SCRT1                               | 7.23E-05    | 0.342316784 |
| cg08708747 | EPHA6                               | 0.000187194 | 0.342312925 |
| cg13582072 | FAM155A                             | 1.96E-05    | 0.342303185 |
| cg03113285 | ENPP4                               | 0.009066563 | 0.342283357 |
| cg01992382 | TNXB                                | 0.000117986 | 0.342281072 |
| cg03807298 |                                     | 0.000187194 | 0.342276875 |
| cg16672562 | HIF3A;HIF3A;HIF3A                   | 3.92E-05    | 0.342272938 |
| cg19716238 | FAM83B                              | 4.34E-05    | 0.342272009 |
| cg06750410 | ANKRD55;ANKRD55                     | 4.34E-05    | 0.342264893 |
| cg15879154 |                                     | 0.001147425 | 0.342262736 |
| cg08876441 | FAM5C                               | 0.001376172 | 0.342259275 |
| cg17583413 | NEUROG3                             | 4.34E-05    | 0.342258902 |
| cg02976699 |                                     | 8.60E-06    | 0.342248317 |
| cg06880612 |                                     | 0.000117986 | 0.342247947 |
| cg13722123 | GRM1;GRM1                           | 8.60E-06    | 0.342229575 |
| cg08384637 | FOXC2                               | 0.000148457 | 0.342228002 |
| cg09588271 | KANK4                               | 0.000148457 | 0.342211835 |
| cg00195796 | SOX2OT                              | 7.23E-05    | 0.342201646 |
| cg18250846 |                                     | 4.34E-05    | 0.342191053 |
| cg05635730 |                                     | 1.50E-05    | 0.342182854 |
| cg27589088 |                                     | 0.000946184 | 0.34217512  |
| cg08621473 |                                     | 3.34E-05    | 0.342156837 |
| cg00856157 | UGT8;UGT8                           | 4.34E-05    | 0.342146113 |
| cg02158486 | MAPK4                               | 1.11E-05    | 0.342134342 |
| cg04213390 |                                     | 0.001147425 | 0.342131198 |
| cg01660999 | ANGPT1                              | 0.000233422 | 0.342129882 |
| cg00257047 |                                     | 0.000233422 | 0.342123217 |
| cg16989059 | ROBO1                               | 0.000117986 | 0.342114262 |
| cg08424188 | BCAR1;BCAR1;BCAR1;BCAR1;BCAR1;BCAR1 | 1.50E-05    | 0.342094083 |
| cg11543397 | MAL2                                | 0.000233422 | 0.342085446 |
| cg04748834 | CHL1                                | 0.001639597 | 0.342080976 |
| cg03782202 | HOXD11                              | 5.59E-05    | 0.342080947 |
| cg08829841 | FOXI2                               | 1.11E-05    | 0.342060123 |
| cg11037576 |                                     | 0.000187194 | 0.342056609 |
| cg23276120 | MEGF11                              | 8.60E-06    | 0.342037421 |

|            |                                     |             |             |
|------------|-------------------------------------|-------------|-------------|
| cg21685427 | SGK2                                | 1.96E-05    | 0.342009229 |
| cg08364137 |                                     | 4.34E-05    | 0.342005722 |
| cg26083180 |                                     | 2.58E-05    | 0.341999593 |
| cg03430923 | C10orf107                           | 7.23E-05    | 0.341995325 |
| cg22007163 |                                     | 7.23E-05    | 0.3419791   |
| cg01428678 | GPHN;GPHN                           | 0.000290372 | 0.341965585 |
| cg13265789 | UNC5C                               | 0.000955793 | 0.341953341 |
| cg22158650 |                                     | 0.002714607 | 0.341948054 |
| cg12297221 | ART5;ART5;ART5                      | 9.24E-05    | 0.341941468 |
| cg14714629 | TRIM4;TRIM4                         | 0.00043997  | 0.34191721  |
| cg02639634 | RGS20;RGS20                         | 5.59E-05    | 0.341887578 |
| cg21005412 | WDR43;SNORD53                       | 7.23E-05    | 0.341886869 |
| cg27220070 | EP400                               | 0.001639597 | 0.34187748  |
| cg10490742 |                                     | 8.60E-06    | 0.341855613 |
| cg20109856 | DLX6AS                              | 0.000654035 | 0.341826274 |
| cg01554410 | IRX6                                | 8.60E-06    | 0.341824829 |
| cg14642432 | A2BP1;A2BP1                         | 7.23E-05    | 0.34181475  |
| cg04779631 | SH3GL3;SH3GL3                       | 7.23E-05    | 0.341813289 |
| cg13891220 | PITX2;PITX2                         | 0.000148457 | 0.341790959 |
| cg15824707 | DUOX2                               | 1.96E-05    | 0.341788275 |
| cg21875330 | PAX9                                | 2.58E-05    | 0.341782176 |
| cg15406010 |                                     | 1.96E-05    | 0.341775561 |
| cg00340850 |                                     | 1.96E-05    | 0.341764287 |
| cg09310891 | CLEC4GP1                            | 0.000233422 | 0.341757695 |
| cg07879785 | CRYL1                               | 9.24E-05    | 0.341756201 |
| cg05124129 | CPNE8                               | 0.001147425 | 0.341734851 |
| cg17278864 | RICH2                               | 0.000148457 | 0.341716738 |
| cg18910324 | FAM46A                              | 0.001147425 | 0.34171362  |
| cg16964946 | LGR4                                | 5.59E-05    | 0.341701405 |
| cg01446894 | PAX1                                | 1.11E-05    | 0.341700577 |
| cg14186641 | CNR1;CNR1;CNR1;CNR1                 | 0.003189589 | 0.341691943 |
| cg02334926 | RGS7BP                              | 5.59E-05    | 0.341682929 |
| cg15638055 | KCNV1                               | 3.34E-05    | 0.341678856 |
| cg06095270 | PRDM13                              | 8.60E-06    | 0.341669652 |
| cg04265797 | SSTR1                               | 1.11E-05    | 0.341646567 |
| cg05861971 | NPAS2                               | 0.000537905 | 0.34162413  |
| cg15084803 | CHCHD4;CHCHD4                       | 0.001147425 | 0.341615694 |
| cg11665991 |                                     | 7.23E-05    | 0.341579553 |
| cg21701379 | TSPAN11                             | 8.60E-06    | 0.341573848 |
| cg14928902 | PRDM14;PRDM14                       | 7.23E-05    | 0.341557901 |
| cg12695586 | OXTR                                | 3.34E-05    | 0.341542242 |
| cg00789960 | MNAT1                               | 0.00043997  | 0.341525082 |
| cg03905758 | HAND2;NBLA00301                     | 7.23E-05    | 0.34151195  |
| cg06294475 | KCNQ1;KCNQ1OT1;KCNQ1                | 0.00043997  | 0.341460358 |
| cg00377344 |                                     | 0.001639597 | 0.341439927 |
| cg03766264 | STK38L                              | 0.000537905 | 0.341434263 |
| cg22282410 | PTPRN2;PTPRN2;PTPRN2                | 4.34E-05    | 0.341432957 |
| cg26387689 | PDE3A                               | 0.000148457 | 0.341431781 |
| cg02441647 | COL8A1;COL8A1;MIR548G;COL8A1;COL8A1 | 2.58E-05    | 0.341406637 |
| cg08554257 | NOD2                                | 0.009066563 | 0.341402257 |
| cg26702958 | FLJ41350                            | 3.34E-05    | 0.341379511 |
| cg04562909 | TBX5;TBX5;TBX5;TBX5                 | 1.50E-05    | 0.341379319 |
| cg07392385 | SORCS1;SORCS1                       | 8.60E-06    | 0.341366546 |
| cg14306650 | RALGPS1                             | 0.000187194 | 0.341354301 |
| cg12978105 |                                     | 0.00043997  | 0.341349579 |
| cg01100175 | KIF5C                               | 5.59E-05    | 0.341346702 |
| cg05905988 | FAM155A                             | 8.60E-06    | 0.341344943 |
| cg00710862 | TGOLN2                              | 9.24E-05    | 0.341309946 |
| cg14980983 | GATA5                               | 0.001639597 | 0.341298628 |
| cg18267374 | NEFM;NEFM;NEFM                      | 8.60E-06    | 0.341290284 |



|            |                                    |             |             |
|------------|------------------------------------|-------------|-------------|
| cg08252579 | FEZF2                              | 0.001147425 | 0.341285573 |
| cg17627654 | SHANK2;SHANK2                      | 0.000290372 | 0.341275587 |
| cg15426956 | RGS7BP                             | 5.59E-05    | 0.341275529 |
| cg22185451 | C7orf13;RNF32                      | 0.000654035 | 0.341269332 |
| cg12258161 | MAGI2                              | 8.60E-06    | 0.341267566 |
| cg24720355 | TBX15                              | 3.34E-05    | 0.341266804 |
| cg23260578 | RNASE10                            | 7.23E-05    | 0.341263934 |
| cg17708016 |                                    | 0.000205664 | 0.34124128  |
| cg04013024 |                                    | 1.96E-05    | 0.341235516 |
| cg03580065 |                                    | 0.00043997  | 0.341235109 |
| cg26820037 | FGF8;FGF8;FGF8;FGF8                | 9.24E-05    | 0.341230346 |
| cg08413427 | DBF4B                              | 1.96E-05    | 0.341226297 |
| cg14347088 | LRFN5                              | 9.24E-05    | 0.341208562 |
| cg06552356 | ALX1                               | 1.11E-05    | 0.341208353 |
| cg23550826 | PDGFRA;PDGFRA                      | 0.000187194 | 0.34118976  |
| cg04982401 | DLC1;DLC1                          | 0.000187194 | 0.341167188 |
| cg21737226 |                                    | 1.96E-05    | 0.34114942  |
| cg10171125 | SCARA5                             | 4.34E-05    | 0.341141491 |
| cg13366352 | GREB1L                             | 0.000148457 | 0.341140968 |
| cg08690634 |                                    | 0.000148457 | 0.341134731 |
| cg05701403 | PLEKHA7                            | 0.000117986 | 0.341133594 |
| cg18421710 |                                    | 2.80E-05    | 0.341129613 |
| cg15725584 |                                    | 1.11E-05    | 0.341128327 |
| cg00221745 | FBXL15;PSD                         | 0.000654035 | 0.34112071  |
| cg12492094 | PDE11A;PDE11A                      | 0.000654035 | 0.341114157 |
| cg12481212 |                                    | 0.000955793 | 0.341103934 |
| cg24461964 | KIF5C;KIF5C                        | 3.34E-05    | 0.341083841 |
| cg20337996 | FAM101A                            | 0.000955793 | 0.341082558 |
| cg00574530 | NEUROG1                            | 0.000357885 | 0.341076112 |
| cg17146570 | EDN3;EDN3;EDN3;EDN3                | 0.005897668 | 0.341074796 |
| cg22855933 |                                    | 0.000537905 | 0.341063742 |
| cg24595261 | RAB32                              | 0.000233422 | 0.341063111 |
| cg11870037 | SASH1                              | 1.50E-05    | 0.341034449 |
| cg07052231 | PEX5;PEX5;PEX5;PEX5;PEX5           | 2.58E-05    | 0.341028198 |
| cg12082609 | MEIS1                              | 0.000290372 | 0.341025139 |
| cg00009088 | VPS37C                             | 0.001376172 | 0.341023987 |
| cg04464122 |                                    | 0.000357885 | 0.341007405 |
| cg12253830 | ST8SIA1                            | 0.000148457 | 0.341005322 |
| cg26667720 |                                    | 0.000187194 | 0.340968977 |
| cg21319932 |                                    | 1.96E-05    | 0.340965168 |
| cg11752769 | CR1L                               | 0.000187194 | 0.340955207 |
| cg14140379 | S100P                              | 1.96E-05    | 0.340949996 |
| cg08084860 |                                    | 0.000187194 | 0.340946538 |
| cg25461801 |                                    | 0.002304201 | 0.34093773  |
| cg17865533 | MAPK4                              | 9.24E-05    | 0.340933493 |
| cg05484788 | PHACTR3                            | 7.23E-05    | 0.340925725 |
| cg04093633 | EFTUD1;EFTUD1                      | 0.00043997  | 0.340915473 |
| cg13622546 | ASB6;ASB6                          | 7.23E-05    | 0.340912338 |
| cg18301891 | DIO3;MIR1247                       | 0.007869847 | 0.340890214 |
| cg05779148 | LIMCH1;LIMCH1;LIMCH1;LIMCH1;LIMCH1 | 3.21E-05    | 0.340883821 |
| cg11011938 | SEMA5A;SEMA5A                      | 0.000654035 | 0.340863653 |
| cg23644960 | TRPC6                              | 0.000654035 | 0.340861714 |
| cg03836615 | ITPR1;ITPR1;ITPR1                  | 7.23E-05    | 0.340842937 |
| cg13329912 |                                    | 3.34E-05    | 0.34083675  |
| cg14307693 |                                    | 0.002304201 | 0.340836301 |
| cg14490882 |                                    | 0.000233422 | 0.34082787  |
| cg16909408 |                                    | 0.002714607 | 0.340825251 |
| cg18087477 | SYCP1;SYCP1                        | 5.11E-05    | 0.340811704 |
| cg12534424 | PRRT4                              | 1.96E-05    | 0.340810514 |
| cg10397440 | PENK;PENK;PENK                     | 3.34E-05    | 0.340804617 |

|            |                                     |             |             |
|------------|-------------------------------------|-------------|-------------|
| cg12806763 | HOXB4                               | 0.000233422 | 0.340800725 |
| cg25400396 | ZNF814                              | 4.34E-05    | 0.340784186 |
| cg23196831 | COL14A1;COL14A1                     | 0.000117986 | 0.340781481 |
| cg15493618 |                                     | 8.60E-06    | 0.340769029 |
| cg02969426 | KCTD4;GTF2F2;KCTD4                  | 1.11E-05    | 0.34074486  |
| cg11052143 | ALS2CR11;ALS2CR11;ALS2CR11;ALS2CR11 | 1.50E-05    | 0.340744011 |
| cg04395689 | ATP6V1B2                            | 0.00043997  | 0.34073752  |
| cg24136205 | ZIC5                                | 5.59E-05    | 0.340734156 |
| cg14742716 | C19orf41                            | 5.59E-05    | 0.340718906 |
| cg25034395 | HPSE2;HPSE2;HPSE2;HPSE2             | 5.59E-05    | 0.340708199 |
| cg08614290 | VIPR2                               | 0.00043997  | 0.340707138 |
| cg11345918 | HCCA2;LOC338651                     | 2.58E-05    | 0.340703393 |
| cg12103152 | HTR1B                               | 0.000233422 | 0.340702949 |
| cg25678088 | DLX6AS                              | 1.50E-05    | 0.340673879 |
| cg22108469 |                                     | 0.000117986 | 0.340647996 |
| cg12894449 | EMX2OS;EMX2;EMX2                    | 0.000117986 | 0.340637791 |
| cg05710753 | AGTR1;AGTR1;AGTR1;AGTR1             | 0.000117986 | 0.340637596 |
| cg07921712 |                                     | 2.58E-05    | 0.340617544 |
| cg17980508 | IFI44L                              | 0.000537905 | 0.340617415 |
| cg04858155 | ALX4                                | 1.50E-05    | 0.340581377 |
| cg23300659 | CHRM2;CHRM2;CHRM2;CHRM2;CHRM2;CHR   | 2.58E-05    | 0.340577897 |
| cg24310461 | C1orf115                            | 0.003189589 | 0.340575957 |
| cg24043916 |                                     | 7.23E-05    | 0.340563453 |
| cg08886973 | LOC441177;C6orf176;C6orf176         | 5.59E-05    | 0.340551058 |
| cg15739581 | GALNT3                              | 0.000357885 | 0.340531009 |
| cg27499860 | MAPK15;MAPK15                       | 1.11E-05    | 0.340530243 |
| cg04987608 | BCAR1;BCAR1;BCAR1;BCAR1;BCAR1       | 4.34E-05    | 0.34051309  |
| cg15959252 | C12orf68;C12orf68                   | 0.000187194 | 0.340496855 |
| cg23677657 | DLX6AS                              | 4.34E-05    | 0.34049009  |
| cg24295381 | EBF2                                | 7.23E-05    | 0.340483161 |
| cg06776588 |                                     | 0.000955793 | 0.340482747 |
| cg03829464 |                                     | 1.11E-05    | 0.340479347 |
| cg18944752 | RGS12;RGS12;RGS12                   | 0.000290372 | 0.340478523 |
| cg07625194 | TFAP2D                              | 4.34E-05    | 0.340477081 |
| cg08638184 |                                     | 5.59E-05    | 0.340453052 |
| cg20991421 | HTR1E                               | 8.60E-06    | 0.340445181 |
| cg02361458 | PRKAA2                              | 8.60E-06    | 0.340421485 |
| cg21158633 | UNCX                                | 0.00043997  | 0.340392843 |
| cg01098320 |                                     | 2.58E-05    | 0.340385926 |
| cg07072366 | LPL                                 | 3.34E-05    | 0.340382678 |
| cg01044849 | NCRNA00171                          | 1.96E-05    | 0.340365291 |
| cg05858126 | MIR146B                             | 0.000654035 | 0.340338496 |
| cg04837280 | TMED9                               | 0.001639597 | 0.340331571 |
| cg21780859 | MTUS2;MTUS2;MTUS2                   | 4.34E-05    | 0.340322083 |
| cg12062220 |                                     | 0.000233422 | 0.34031304  |
| cg06917617 | CR1L                                | 5.59E-05    | 0.34030743  |
| cg00782708 | C2orf34                             | 3.34E-05    | 0.340306004 |
| cg02343823 | ZNF300                              | 0.002304201 | 0.340303312 |
| cg01505987 |                                     | 2.58E-05    | 0.340280832 |
| cg03911494 | MARVELD3;MARVELD3                   | 0.001393182 | 0.340279984 |
| cg19594666 | LEP                                 | 0.000148457 | 0.340278161 |
| cg09059267 |                                     | 2.58E-05    | 0.340271915 |
| cg24800880 | ANK1                                | 0.000233422 | 0.340265957 |
| cg01241390 | RNU5E;RNU5D;ZCCHC9;ZCCHC9;ZCCHC9    | 0.000233422 | 0.340239992 |
| cg05715532 | IHH                                 | 2.58E-05    | 0.340233209 |
| cg14670435 | MIR1258;ZNF385B                     | 3.34E-05    | 0.340220371 |
| cg24913349 | LIFR;LIFR                           | 2.58E-05    | 0.340194479 |
| cg17432620 |                                     | 2.58E-05    | 0.340192805 |
| cg09693811 |                                     | 0.001376172 | 0.340180533 |
| cg13394305 | SLC40A1                             | 0.000955793 | 0.340170319 |

|            |                                     |             |             |
|------------|-------------------------------------|-------------|-------------|
| cg18026225 | PLCD3                               | 4.34E-05    | 0.340165726 |
| cg05709770 |                                     | 0.000233422 | 0.340156083 |
| cg24182831 | TSNARE1                             | 0.001639597 | 0.340144957 |
| cg04257984 | LOC440925                           | 7.23E-05    | 0.340128322 |
| cg19598584 | HOXA2                               | 0.001376172 | 0.340121694 |
| cg15709235 | ROBO1;ROBO1;ROBO1;ROBO1;ROBO1;ROBO1 | 9.24E-05    | 0.340097353 |
| cg00087368 | SIM1                                | 2.58E-05    | 0.340090692 |
| cg19990182 | WDR35;WDR35                         | 0.000148457 | 0.340084532 |
| cg08874035 | KIAA1598;KIAA1598                   | 3.34E-05    | 0.340082679 |
| cg20571592 |                                     | 8.60E-06    | 0.340069324 |
| cg04128045 | IGSF21                              | 9.24E-05    | 0.340064426 |
| cg09160776 |                                     | 8.60E-06    | 0.34005663  |
| cg16574134 | PAX2;PAX2;PAX2;PAX2;PAX2            | 7.23E-05    | 0.340055265 |
| cg20467168 |                                     | 0.003734675 | 0.340038514 |
| cg14876117 |                                     | 0.000654035 | 0.34003555  |
| cg17384889 | NKAPL                               | 0.000233422 | 0.340024082 |
| cg16324121 | IL17RE;IL17RE;IL17RE                | 0.001147425 | 0.340016661 |
| cg07035165 | KCNN2                               | 1.11E-05    | 0.339987799 |
| cg14045860 |                                     | 4.34E-05    | 0.339987756 |
| cg15100426 | PNKD;PNKD                           | 5.59E-05    | 0.339986806 |
| cg26295057 | GDNF                                | 0.002714607 | 0.339984914 |
| cg01026458 | NECAB1                              | 8.60E-06    | 0.339981272 |
| cg23986671 | ADAMTS5;ADAMTS5                     | 4.34E-05    | 0.339966682 |
| cg22867063 | ZNF214;NLRP14;ZNF214                | 0.000233422 | 0.339930525 |
| cg06390651 |                                     | 0.000955793 | 0.339929615 |
| cg14793406 |                                     | 1.96E-05    | 0.339929339 |
| cg11960629 | SLC16A12                            | 0.000187194 | 0.339927828 |
| cg26406563 | C1orf175;C1orf175                   | 3.34E-05    | 0.339913496 |
| cg22991320 | C20orf85                            | 4.34E-05    | 0.339912351 |
| cg12967001 | EPB41L3                             | 0.000158823 | 0.339888668 |
| cg25033990 | ACCN1                               | 0.000357885 | 0.339878262 |
| cg22187251 | GCNT2                               | 0.009066563 | 0.339840043 |
| cg08044427 |                                     | 1.96E-05    | 0.339837043 |
| cg09187338 |                                     | 5.59E-05    | 0.339834796 |
| cg27649073 | PITX3                               | 0.000290372 | 0.339816518 |
| cg01616926 | PITX2;PITX2                         | 0.000791389 | 0.339791868 |
| cg14782015 | CRB3;CRB3                           | 2.58E-05    | 0.339790233 |
| cg19585597 | LOC134466                           | 1.96E-05    | 0.339777512 |
| cg00314003 |                                     | 8.60E-06    | 0.339770842 |
| cg25536676 | DHCR24                              | 1.11E-05    | 0.339766465 |
| cg02487453 | OSBP2                               | 0.000654035 | 0.339761387 |
| cg01503348 | SVEP1                               | 9.24E-05    | 0.339755959 |
| cg07267782 | FAM83B                              | 0.001291055 | 0.339749025 |
| cg23302570 | NXPH2                               | 0.000290372 | 0.339743348 |
| cg22029275 | FAM123A;FAM123A;FAM123A;FAM123A     | 0.000955793 | 0.339729563 |
| cg15491247 | PRDM16;PRDM16                       | 9.24E-05    | 0.339712282 |
| cg15681577 |                                     | 1.11E-05    | 0.339690738 |
| cg00004996 | MTMR7                               | 2.58E-05    | 0.339655523 |
| cg16431436 | VCAN;VCAN;VCAN;VCAN                 | 0.003734675 | 0.33965547  |
| cg17235702 |                                     | 2.58E-05    | 0.339647485 |
| cg16514543 |                                     | 0.000148457 | 0.339635029 |
| cg11145160 | CLDN11                              | 0.001887355 | 0.339620852 |
| cg16306900 | ZNF648                              | 0.000290372 | 0.339603811 |
| cg01181227 |                                     | 0.000117986 | 0.339599607 |
| cg14713146 |                                     | 7.23E-05    | 0.339596886 |
| cg03032497 |                                     | 0.000357885 | 0.339585345 |
| cg09363735 | TFAP2B                              | 2.58E-05    | 0.339583037 |
| cg08747377 | CDH13;CDH13                         | 5.59E-05    | 0.339581553 |
| cg21771250 | FAM83F                              | 0.000290372 | 0.339572384 |
| cg08012521 |                                     | 5.59E-05    | 0.339569664 |

|            |                                       |             |             |
|------------|---------------------------------------|-------------|-------------|
| cg15041550 | GLP1R;GLP1R                           | 0.000290372 | 0.339559915 |
| cg12238343 | RXFP3                                 | 7.23E-05    | 0.339556261 |
| cg23685965 | CYB5A;CYB5A                           | 3.34E-05    | 0.339549055 |
| cg18532076 | FAM83B                                | 9.24E-05    | 0.339548049 |
| cg21216477 | HOXC4                                 | 0.000148457 | 0.339545866 |
| cg25307902 | SNAP25;SNAP25                         | 0.000537905 | 0.339542946 |
| cg05674784 | TBX18                                 | 2.58E-05    | 0.339513984 |
| cg07143462 |                                       | 7.23E-05    | 0.339508726 |
| cg18533386 | CACNA1E                               | 0.000791389 | 0.339507116 |
| cg02264990 | HOXC4;HOXC4                           | 0.000233422 | 0.339491611 |
| cg21293934 | ANKRD30B                              | 0.0050758   | 0.339483808 |
| cg07318417 | NMU                                   | 0.000148457 | 0.339479806 |
| cg14188639 | INS-IGF2;IGF2AS;IGF2;IGF2;IGF2AS;IGF2 | 2.58E-05    | 0.339476624 |
| cg12070987 | NDUFS8                                | 3.34E-05    | 0.339467489 |
| cg02901723 | FAM190A                               | 4.34E-05    | 0.339440268 |
| cg09557556 | KCNC1;KCNC1                           | 0.000955793 | 0.339435402 |
| cg01627252 | CAPN14                                | 0.000791389 | 0.339430763 |
| cg25798409 | ERBB4;ERBB4                           | 1.11E-05    | 0.339414427 |
| cg22851420 | HPCAL4                                | 4.34E-05    | 0.339405098 |
| cg19235974 |                                       | 0.00043997  | 0.339392943 |
| cg06821999 |                                       | 1.50E-05    | 0.339392792 |
| cg04582294 | GRID1                                 | 0.000233422 | 0.339388645 |
| cg16915821 | DKK3;DKK3;DKK3                        | 0.000791389 | 0.339387855 |
| cg00279001 |                                       | 1.96E-05    | 0.339386386 |
| cg09191731 | HS3ST2                                | 1.50E-05    | 0.339367706 |
| cg19498794 | RASAL2;RASAL2                         | 7.23E-05    | 0.339359539 |
| cg26492368 | SPAG6;SPAG6                           | 3.34E-05    | 0.339355496 |
| cg26913248 | TWIST2                                | 0.000357885 | 0.339350565 |
| cg20283498 | CDH23;CDH23                           | 7.23E-05    | 0.339345776 |
| cg20646280 | KCTD8                                 | 1.11E-05    | 0.339334391 |
| cg23587176 | FO XK1                                | 3.34E-05    | 0.339310569 |
| cg06691542 |                                       | 0.000117986 | 0.339310076 |
| cg06276708 | AP3B2                                 | 2.58E-05    | 0.339305008 |
| cg08064068 |                                       | 0.000187194 | 0.339301093 |
| cg08424167 |                                       | 0.000290372 | 0.339288159 |
| cg10243398 | ROBO1                                 | 4.34E-05    | 0.339286763 |
| cg09808235 | MMEL1                                 | 0.000654035 | 0.339284515 |
| cg14031402 |                                       | 3.34E-05    | 0.339268579 |
| cg01176947 |                                       | 1.50E-05    | 0.339265802 |
| cg20626645 | CACNA1D;CACNA1D;CACNA1D               | 0.000791389 | 0.339265389 |
| cg24364535 | OPCML                                 | 4.34E-05    | 0.339262873 |
| cg04355791 | MIR129-2                              | 0.000791389 | 0.339256115 |
| cg14013195 | C2orf39                               | 2.58E-05    | 0.339250828 |
| cg14427437 |                                       | 3.34E-05    | 0.339246351 |
| cg24306982 |                                       | 0.000148457 | 0.339237214 |
| cg01321673 | IL17REL                               | 2.58E-05    | 0.339231111 |
| cg01263386 | SLC8A2                                | 0.000187194 | 0.339227017 |
| cg05117208 | STAT5A                                | 0.000117986 | 0.33922506  |
| cg02661802 | HTRA1;HTRA1                           | 0.000187194 | 0.339222191 |
| cg14164099 |                                       | 0.000148457 | 0.339218446 |
| cg17283453 | ZNF177                                | 0.000187194 | 0.339211589 |
| cg19360330 |                                       | 7.23E-05    | 0.339205287 |
| cg15391574 | GLB1L2                                | 1.96E-05    | 0.339202412 |
| cg20183094 |                                       | 8.60E-06    | 0.339198336 |
| cg24891539 | SOX17                                 | 0.000357885 | 0.339193479 |
| cg06288696 | CRYGN;CRYGN                           | 0.003734675 | 0.339187906 |
| cg10725720 | HCRTR2;HCRTR2                         | 0.000187194 | 0.339182317 |
| cg18616418 |                                       | 4.34E-05    | 0.339170414 |
| cg12922751 |                                       | 4.34E-05    | 0.339159636 |
| cg11463113 | CRYGD                                 | 0.000537905 | 0.339159349 |

|            |                                 |             |             |
|------------|---------------------------------|-------------|-------------|
| cg26766005 | SP5;LOC440925;SP5               | 0.000233422 | 0.339158719 |
| cg04743945 | GRM3                            | 0.000357885 | 0.339154287 |
| cg20037575 |                                 | 9.24E-05    | 0.339152461 |
| cg23257935 | SPAG17;SPAG17                   | 2.58E-05    | 0.339136818 |
| cg05545441 |                                 | 0.000290372 | 0.33913325  |
| cg24654525 | GEFT;GEFT                       | 5.59E-05    | 0.339124346 |
| cg00548708 |                                 | 5.59E-05    | 0.339114714 |
| cg10095016 | DNAJC30;WBSCR22                 | 1.50E-05    | 0.339103211 |
| cg07732115 | DYNLRB2                         | 0.000537905 | 0.339099682 |
| cg20720686 | POR                             | 0.000187194 | 0.339094649 |
| cg17704343 | KIF18B                          | 9.24E-05    | 0.339081536 |
| cg21611810 | TBX5;TBX5;TBX5;TBX5             | 0.000290372 | 0.339080409 |
| cg26375057 | ZIC1;ZIC1                       | 1.96E-05    | 0.339073714 |
| cg22154024 | ASCL1                           | 0.000357885 | 0.339060919 |
| cg25285090 |                                 | 5.59E-05    | 0.339047088 |
| cg02367736 | MOSC2                           | 0.003189589 | 0.339046889 |
| cg03285577 |                                 | 1.50E-05    | 0.339041704 |
| cg23563008 | DLX6AS;DLX6                     | 0.009066563 | 0.339019091 |
| cg14709292 | NUDT16P;NUDT16P                 | 1.96E-05    | 0.338984369 |
| cg12005098 | SLC16A12                        | 0.000537905 | 0.338976364 |
| cg09323727 |                                 | 0.002304201 | 0.338973784 |
| cg00744413 |                                 | 1.11E-05    | 0.338936034 |
| cg13628577 | PRDM6                           | 5.59E-05    | 0.338934249 |
| cg09366312 | TMEM200C                        | 0.000290372 | 0.3388996   |
| cg08523865 | CNTNAP5                         | 7.23E-05    | 0.338892116 |
| cg24833674 | ILDR2                           | 0.000955793 | 0.33888161  |
| cg01258200 | ANKRD56                         | 5.59E-05    | 0.338880403 |
| cg04020984 | LOC100270746;C6orf41            | 4.34E-05    | 0.33887638  |
| cg09339194 | GATA5                           | 0.000654035 | 0.338870114 |
| cg14737994 | ZNF177                          | 1.11E-05    | 0.338863848 |
| cg00109356 | SHISA2                          | 9.24E-05    | 0.338848875 |
| cg03023152 | GRHL2                           | 0.000233422 | 0.33884859  |
| cg03209854 | ADAMTS16                        | 2.58E-05    | 0.338793331 |
| cg22763649 | PAX1                            | 1.96E-05    | 0.338788971 |
| cg12678667 | MOGAT1                          | 1.96E-05    | 0.338777972 |
| cg17496887 | S100A7A                         | 4.34E-05    | 0.338776245 |
| cg01283289 | ACSS3                           | 1.50E-05    | 0.338771644 |
| cg22297146 | MYEF2;MYEF2                     | 0.001147425 | 0.338757153 |
| cg02232208 |                                 | 4.34E-05    | 0.338745926 |
| cg13361703 | TMEM20;TMEM20                   | 5.59E-05    | 0.338736446 |
| cg23780110 | ASXL2                           | 0.005897668 | 0.338720507 |
| cg02799411 | ITPR1;ITPR1;ITPR1;EGOT          | 0.003734675 | 0.338706571 |
| cg20470857 | C1QL2                           | 8.60E-06    | 0.338694012 |
| cg08194009 |                                 | 0.00043997  | 0.338691343 |
| cg17912370 | C3orf55;C3orf55;C3orf55;C3orf55 | 0.000187194 | 0.338677934 |
| cg05514256 |                                 | 0.000148457 | 0.338677425 |
| cg02214623 | GNB2L1                          | 2.58E-05    | 0.338674358 |
| cg27126555 |                                 | 1.11E-05    | 0.338671552 |
| cg23825057 | RILPL1                          | 0.000117986 | 0.338664003 |
| cg17343563 | TFAP2B                          | 0.000955793 | 0.338653218 |
| cg27045356 | NDFIP2;NDFIP2                   | 0.000148457 | 0.338636412 |
| cg15480095 | IGSF9B                          | 3.34E-05    | 0.338624775 |
| cg08425678 | PRDM2                           | 0.000148457 | 0.338624105 |
| cg04007303 | FOXE1;FOXE1                     | 4.34E-05    | 0.338615044 |
| cg03764259 |                                 | 0.001147425 | 0.338610264 |
| cg16276063 | SOX2OT                          | 0.000866489 | 0.338602345 |
| cg00555036 |                                 | 1.50E-05    | 0.338578804 |
| cg01247426 | NELL2;NELL2;NELL2;NELL2;NELL2   | 0.000290372 | 0.338577106 |
| cg07920503 | FAM123A;FAM123A                 | 0.000233422 | 0.338571793 |
| cg25255850 |                                 | 2.58E-05    | 0.338553961 |

|            |                                      |             |             |
|------------|--------------------------------------|-------------|-------------|
| cg19589811 | FAM181B                              | 7.23E-05    | 0.338545689 |
| cg00431549 | MGP                                  | 0.004357816 | 0.338527983 |
| cg07057579 |                                      | 1.50E-05    | 0.338492887 |
| cg01656470 | PEG3;PEG3;ZIM2;PEG3;PEG3;ZIM2;ZIM2   | 8.60E-06    | 0.338475497 |
| cg27434954 | GALNT11                              | 1.96E-05    | 0.338466337 |
| cg11760198 | BRUNOL4;BRUNOL4;BRUNOL4;BRUNOL4      | 1.96E-05    | 0.338451748 |
| cg14598976 |                                      | 5.59E-05    | 0.338444505 |
| cg27586417 |                                      | 0.000233422 | 0.338434848 |
| cg12877251 | LOC157627                            | 0.000654035 | 0.338428629 |
| cg23022785 |                                      | 0.000537905 | 0.338417128 |
| cg08022436 | KCNJ3                                | 8.60E-06    | 0.338416092 |
| cg15059608 | C3orf14                              | 8.60E-06    | 0.338396868 |
| cg13390630 | CDH22                                | 0.000233422 | 0.338385734 |
| cg25149751 | PPP2R2B;PPP2R2B;PPP2R2B;PPP2R2B;PPP2 | 0.000187194 | 0.338383236 |
| cg08210322 | C2orf72                              | 4.34E-05    | 0.338378712 |
| cg05694921 | PTPRU;PTPRU;PTPRU                    | 3.34E-05    | 0.338371471 |
| cg25897519 |                                      | 0.000357885 | 0.338370619 |
| cg08034077 | CA10;CA10;CA10;CA10                  | 5.59E-05    | 0.338369356 |
| cg16234966 | FAM84A                               | 1.96E-05    | 0.338352209 |
| cg19382919 | LOC440925;SP5                        | 0.000357885 | 0.338339794 |
| cg10112407 | AGAP1;AGAP1                          | 0.000791389 | 0.338313451 |
| cg07904452 |                                      | 0.004357816 | 0.338311818 |
| cg23093609 |                                      | 1.96E-05    | 0.338293982 |
| cg12610471 | SPAG6;SPAG6                          | 0.000148457 | 0.338264807 |
| cg17944161 | NOTCH3                               | 0.000955793 | 0.338233175 |
| cg06951565 | GRM6                                 | 0.002304201 | 0.338229404 |
| cg04988206 | CT62;CT62                            | 0.00043997  | 0.338229037 |
| cg17959183 | RAB10                                | 0.000955793 | 0.338227591 |
| cg23407265 | RHOBTB1;RHOBTB1                      | 0.000537905 | 0.338221859 |
| cg00154119 |                                      | 1.50E-05    | 0.338216703 |
| cg14200569 | PRDM16;PRDM16                        | 0.000654035 | 0.33821247  |
| cg26896771 |                                      | 5.59E-05    | 0.338195743 |
| cg26685195 | SLC30A10                             | 2.80E-05    | 0.338192427 |
| cg14273450 | C2orf39                              | 0.000117986 | 0.338161542 |
| cg04774711 |                                      | 3.34E-05    | 0.338147543 |
| cg15070718 | NR2F2;NR2F2;NR2F2;NR2F2;MIR1469      | 1.11E-05    | 0.338140619 |
| cg12487540 | PCDHGA2;PCDHGA4;PCDHGA1;PCDHGB1;PC   | 0.000233422 | 0.33812165  |
| cg10557578 | RAB11FIP1;RAB11FIP1                  | 0.00043997  | 0.338116246 |
| cg21356631 |                                      | 0.001376172 | 0.33810147  |
| cg06833823 | LOC441666                            | 0.000262362 | 0.338098345 |
| cg19117365 | CLSTN2                               | 2.58E-05    | 0.338083668 |
| cg14448169 | WNT16;WNT16                          | 0.00043997  | 0.338073174 |
| cg12154418 | THBS1                                | 0.000148457 | 0.338071528 |
| cg25848398 | C2orf72                              | 7.23E-05    | 0.338070929 |
| cg05368033 | FGFR2;FGFR2;FGFR2;FGFR2;FGFR2;FGFR2  | 2.58E-05    | 0.338064971 |
| cg26807939 | SOX14                                | 8.60E-06    | 0.338051524 |
| cg02286506 |                                      | 7.23E-05    | 0.338017483 |
| cg10576280 | PLEKHA1                              | 9.24E-05    | 0.338011185 |
| cg22946159 |                                      | 1.50E-05    | 0.3380099   |
| cg19688403 |                                      | 7.23E-05    | 0.338002073 |
| cg12449685 | ROBO4                                | 4.34E-05    | 0.337996954 |
| cg08504812 | C3orf55;C3orf55;C3orf55;C3orf55      | 0.000290372 | 0.337993454 |
| cg16489809 | TCTN3;TCTN3                          | 4.34E-05    | 0.337980304 |
| cg02138331 | AHCY                                 | 1.50E-05    | 0.337969992 |
| cg13216331 | ROBLD3;ROBLD3                        | 0.001639597 | 0.337953951 |
| cg08522176 | ROBO3;ROBO3                          | 3.34E-05    | 0.337943959 |
| cg21243944 |                                      | 0.000187194 | 0.337930256 |
| cg14073722 | CA10;CA10;CA10;CA10                  | 7.23E-05    | 0.337921102 |
| cg08662757 | SSH3;SSH3                            | 0.009066563 | 0.337917672 |
| cg14585235 |                                      | 0.000187194 | 0.337900534 |

|            |                                 |             |             |
|------------|---------------------------------|-------------|-------------|
| cg07291439 | ZIC1                            | 7.23E-05    | 0.337898998 |
| cg03029734 |                                 | 8.60E-06    | 0.337896552 |
| cg25826457 | HLF;HLF                         | 0.000290372 | 0.337895126 |
| cg22131691 | PDE1C;PDE1C                     | 7.23E-05    | 0.337883257 |
| cg13832669 |                                 | 0.000570759 | 0.337858097 |
| cg11956761 | LPPR4;LPPR4                     | 1.11E-05    | 0.337835806 |
| cg12978433 | CYP24A1;CYP24A1                 | 0.000117986 | 0.337830865 |
| cg18688704 | PDGFC                           | 6.94E-05    | 0.337806991 |
| cg04718414 | CDC16;CDC16                     | 0.000955793 | 0.337798938 |
| cg22418829 | BTNL9                           | 0.000148457 | 0.337790118 |
| cg18863333 | SOX11                           | 0.002714607 | 0.337758386 |
| cg11827101 |                                 | 1.11E-05    | 0.337755544 |
| cg01592801 | KCNS2                           | 5.59E-05    | 0.337754937 |
| cg15608277 | KRT3                            | 0.001147425 | 0.337742725 |
| cg16080781 | DBX2                            | 1.96E-05    | 0.337728519 |
| cg18313899 | SLC35F1                         | 8.60E-06    | 0.337712982 |
| cg06707544 | KLK7;KLK7                       | 0.000233422 | 0.337695592 |
| cg08828819 | PON3                            | 0.001147425 | 0.337692168 |
| cg24743156 | CTAGE5;CTAGE5;CTAGE5;CTAGE5     | 0.002714607 | 0.337685046 |
| cg25474372 |                                 | 0.000537905 | 0.337681503 |
| cg26938364 | FLJ42875;PRDM16;PRDM16;FLJ42875 | 0.000654035 | 0.337667263 |
| cg12052765 | SLC18A3;CHAT                    | 1.96E-05    | 0.337656607 |
| cg03346079 | WNT7A                           | 0.000233422 | 0.337654848 |
| cg08165971 | NGEF;NGEF                       | 0.001376172 | 0.337650287 |
| cg01574364 | SLC36A1                         | 4.34E-05    | 0.337648154 |
| cg11994674 |                                 | 0.000290372 | 0.337632741 |
| cg17803175 | PCSK1                           | 2.58E-05    | 0.337632569 |
| cg08226111 | INSM2                           | 0.000955793 | 0.337623914 |
| cg19194098 | ARMC4                           | 0.006738759 | 0.337623183 |
| cg08937380 | TMEM61                          | 1.11E-05    | 0.337620745 |
| cg06122230 | ZNFX1                           | 0.000791389 | 0.337578144 |
| cg26266842 | LPPR5;LPPR5                     | 4.34E-05    | 0.337576967 |
| cg23973429 | GRHL2;GRHL2                     | 0.000357885 | 0.337549856 |
| cg21700532 | SDR16C5                         | 0.000654035 | 0.337545557 |
| cg10956096 |                                 | 1.96E-05    | 0.337544763 |
| cg15956237 | ADAMTS9                         | 0.000705485 | 0.33754168  |
| cg11731671 | PRDM16;PRDM16                   | 2.58E-05    | 0.337529471 |
| cg13738615 | ZNF462                          | 0.000357885 | 0.337502805 |
| cg18358723 | LOC645323                       | 0.000654035 | 0.337481539 |
| cg07268332 | AMPD3;AMPD3;AMPD3               | 0.000148457 | 0.337474395 |
| cg01070794 |                                 | 9.24E-05    | 0.337456633 |
| cg07640800 | LRRTM1;CTNNA2;CTNNA2            | 8.60E-06    | 0.33744855  |
| cg20156450 | SLC16A9                         | 0.00043997  | 0.337440162 |
| cg19427746 | CAMTA2;CAMTA2;CAMTA2;CAMTA2     | 0.000537905 | 0.337432245 |
| cg04399899 | RAPGEF2;RAPGEF2                 | 0.000537905 | 0.337429899 |
| cg16648062 | RIMS2                           | 0.00043997  | 0.337423733 |
| cg03251287 |                                 | 2.58E-05    | 0.337422612 |
| cg09048530 | FZD10                           | 0.000357885 | 0.337412541 |
| cg18623216 | PLCH1;PLCH1                     | 0.000537905 | 0.337367339 |
| cg26619908 |                                 | 1.96E-05    | 0.337363984 |
| cg00033127 | SNX7;SNX7;SNX7                  | 0.002040485 | 0.337350427 |
| cg00674004 |                                 | 0.000357885 | 0.337322996 |
| cg13985485 |                                 | 0.001147425 | 0.337316143 |
| cg25287474 | ZDHHC21                         | 0.0050758   | 0.337315359 |
| cg22511808 | GFM1                            | 7.23E-05    | 0.337299537 |
| cg07171496 | TDRD5                           | 1.96E-05    | 0.337299303 |
| cg05398036 |                                 | 0.000955793 | 0.337298005 |
| cg21762820 | FAM78B                          | 8.60E-06    | 0.337285287 |
| cg22153181 | GALNTL6                         | 0.001639597 | 0.337285136 |
| cg08506931 | CCDC140                         | 0.000187194 | 0.337284049 |

|            |                                      |             |             |
|------------|--------------------------------------|-------------|-------------|
| cg13713293 | DMRT1                                | 0.000117986 | 0.337279132 |
| cg11324953 | HTT                                  | 2.58E-05    | 0.337261251 |
| cg20536469 | NRXN1;NRXN1;NRXN1                    | 4.34E-05    | 0.33725893  |
| cg17546366 |                                      | 0.000357885 | 0.337251551 |
| cg14494620 |                                      | 0.000148457 | 0.337244014 |
| cg09619146 | CPXM2                                | 4.34E-05    | 0.33721191  |
| cg02471132 |                                      | 9.24E-05    | 0.337201626 |
| cg05062333 | EYA4;EYA4;EYA4                       | 0.001147425 | 0.337198282 |
| cg14272822 | PTCH1;PTCH1;PTCH1;PTCH1              | 0.000233422 | 0.337186982 |
| cg01783662 | SOX2OT                               | 2.58E-05    | 0.337184381 |
| cg18984452 |                                      | 1.96E-05    | 0.337176937 |
| cg05093169 | PHOX2A                               | 4.34E-05    | 0.337175441 |
| cg23697278 | GLRA3;GLRA3                          | 7.23E-05    | 0.337174979 |
| cg15736524 |                                      | 7.23E-05    | 0.337169576 |
| cg09072120 | PRTFDC1                              | 0.000357885 | 0.337168375 |
| cg15056288 |                                      | 2.58E-05    | 0.337152469 |
| cg01682111 | UNKL                                 | 6.94E-05    | 0.337151158 |
| cg08081323 | RTN4RL2                              | 4.34E-05    | 0.337100815 |
| cg26949694 | BDNF;BDNF;BDNF;BDNF;BDNF;BDNF;BDNF   | 9.24E-05    | 0.337097038 |
| cg00909926 | ESRRG;ESRRG;ESRRG;ESRRG;ESRRG        | 0.000187194 | 0.337092148 |
| cg18821485 | ARNT2                                | 0.000955793 | 0.337077611 |
| cg24238409 | CPEB3                                | 9.24E-05    | 0.337072181 |
| cg19908485 |                                      | 3.34E-05    | 0.33706775  |
| cg07059360 | POLR3D                               | 1.11E-05    | 0.337062785 |
| cg02257750 | HSPA12A                              | 0.000117986 | 0.33705409  |
| cg11750592 |                                      | 1.50E-05    | 0.337045707 |
| cg23705224 | CTXN2;CTXN2                          | 1.96E-05    | 0.33704275  |
| cg01677601 | PARVA                                | 0.000117986 | 0.337032821 |
| cg11079048 | KIAA1598;KIAA1598                    | 0.000357885 | 0.337031421 |
| cg01286655 | DKK3;DKK3;DKK3                       | 1.50E-05    | 0.336993138 |
| cg18334637 | C10orf41;ZNF503                      | 0.000117986 | 0.336992222 |
| cg27100236 | GATA4                                | 7.23E-05    | 0.33698068  |
| cg18641151 | ARHGEF10L                            | 4.34E-05    | 0.336975277 |
| cg22762091 | ADCY8                                | 1.11E-05    | 0.33695793  |
| cg12508451 | LOC145845                            | 2.58E-05    | 0.336956008 |
| cg23689712 | LMX1A                                | 4.34E-05    | 0.336955465 |
| cg05366118 |                                      | 0.000117986 | 0.336947825 |
| cg13832670 | CREB3L2                              | 7.23E-05    | 0.336937532 |
| cg01496199 |                                      | 0.000357885 | 0.33693193  |
| cg05142211 | SOX2OT;SOX2                          | 0.000290372 | 0.336927174 |
| cg16146033 | SLC22A8                              | 0.000290372 | 0.336895371 |
| cg01837362 |                                      | 2.58E-05    | 0.33688956  |
| cg02850815 | SCRIB;SCRIB;MIR937                   | 2.58E-05    | 0.336874095 |
| cg13912858 | SORT1                                | 0.000148457 | 0.336864353 |
| cg07188523 |                                      | 0.000117986 | 0.336855508 |
| cg23954268 |                                      | 0.000117986 | 0.336850305 |
| cg05853159 |                                      | 4.34E-05    | 0.336841109 |
| cg12213414 | LYG2                                 | 0.000537905 | 0.336827864 |
| cg03611868 |                                      | 8.60E-06    | 0.336822959 |
| cg00705280 | MIR375                               | 0.000357885 | 0.336813455 |
| cg23891273 | MYBPC1;MYBPC1;MYBPC1;MYBPC1          | 0.000791389 | 0.336808279 |
| cg00625653 | WNT7A                                | 7.23E-05    | 0.336803156 |
| cg27554973 |                                      | 0.000357885 | 0.336791462 |
| cg04455058 |                                      | 0.000233422 | 0.336789433 |
| cg02194223 | EVX1                                 | 0.000148457 | 0.336786819 |
| cg10313385 |                                      | 9.24E-05    | 0.336782487 |
| cg12385599 | LOC389493                            | 9.24E-05    | 0.336781698 |
| cg07015911 | HOXB4                                | 0.000148457 | 0.336765494 |
| cg13983063 | PPP2R2B;PPP2R2B;PPP2R2B;PPP2R2B;PPP2 | 3.34E-05    | 0.336745887 |
| cg24293044 | C6orf97                              | 4.34E-05    | 0.336745852 |



|            |                                         |             |             |
|------------|-----------------------------------------|-------------|-------------|
| cg10576051 | HCN4                                    | 0.000955793 | 0.33673322  |
| cg14515996 |                                         | 0.000187194 | 0.336708463 |
| cg09854003 |                                         | 4.34E-05    | 0.33670533  |
| cg16321280 | ALX4                                    | 0.000290372 | 0.336702738 |
| cg15135286 | LTBP1;LTBP1;LTBP1;LTBP1;LTBP1           | 2.58E-05    | 0.336696952 |
| cg06570224 |                                         | 4.34E-05    | 0.336688256 |
| cg11800635 | DOK1                                    | 0.000117986 | 0.336675286 |
| cg23251248 | TBPL2                                   | 1.50E-05    | 0.336646489 |
| cg21644856 | FN3K                                    | 0.000654035 | 0.336641767 |
| cg25013011 | TMEM132D                                | 5.59E-05    | 0.336613376 |
| cg13612083 | C6orf174                                | 0.000955793 | 0.336601628 |
| cg25553665 | BMPR1B                                  | 0.000117986 | 0.336589285 |
| cg21634365 | GALR1                                   | 0.000117986 | 0.336587275 |
| cg20422099 | ADAMTS2;ADAMTS2                         | 0.001376172 | 0.336571344 |
| cg06664254 |                                         | 7.23E-05    | 0.336568767 |
| cg26816707 |                                         | 1.50E-05    | 0.336544171 |
| cg12802310 | CYP1B1                                  | 0.000233422 | 0.336540615 |
| cg03595755 |                                         | 0.000955793 | 0.336538599 |
| cg02610222 | POU4F2;POU4F2                           | 8.60E-06    | 0.336524859 |
| cg13928649 | PRDM12                                  | 1.11E-05    | 0.33652356  |
| cg24336089 | PRDM13                                  | 3.34E-05    | 0.336512531 |
| cg23659250 | BRD1;LOC90834                           | 0.000187194 | 0.336493883 |
| cg11855022 | PLSCR4;PLSCR4;PLSCR4;PLSCR4             | 0.002304201 | 0.336471548 |
| cg25753024 | SSH3                                    | 0.009066563 | 0.336460229 |
| cg09533178 | PPP1R12C                                | 3.34E-05    | 0.336456388 |
| cg17102963 | TRIM67                                  | 2.58E-05    | 0.336443198 |
| cg11416811 | C10orf107                               | 0.000233422 | 0.336438908 |
| cg14926196 | MDGA1                                   | 0.000187194 | 0.336433593 |
| cg17735593 | PCDHB7                                  | 4.34E-05    | 0.336425451 |
| cg06237774 | DPY19L2P4                               | 9.24E-05    | 0.33640914  |
| cg05256605 | LOX                                     | 0.00043997  | 0.336398948 |
| cg08012278 |                                         | 1.50E-05    | 0.336378813 |
| cg05202204 |                                         | 7.23E-05    | 0.336377758 |
| cg02285812 | RND3                                    | 8.60E-06    | 0.336376458 |
| cg12599673 | CT62                                    | 5.59E-05    | 0.336368807 |
| cg17540545 | FXD1;FXD1                               | 0.000654035 | 0.336366846 |
| cg21074827 | MLF1;MLF1;MLF1                          | 0.000117986 | 0.33635548  |
| cg10594090 | HIF3A;HIF3A                             | 0.000537905 | 0.336349888 |
| cg05327789 | SLCO4A1                                 | 0.001639597 | 0.336337486 |
| cg13358873 | ANTXR1;ANTXR1;ANTXR1                    | 1.50E-05    | 0.33632711  |
| cg24475782 | TBX15                                   | 0.00043997  | 0.33630026  |
| cg25248750 | C8orf47;C8orf47                         | 9.24E-05    | 0.336275586 |
| cg07303968 | HSPA12A                                 | 0.001147425 | 0.336254463 |
| cg26345888 | DAB1                                    | 0.000233422 | 0.336253658 |
| cg06899985 | IGDCC4                                  | 0.00043997  | 0.33623488  |
| cg17959970 |                                         | 0.000117986 | 0.336228537 |
| cg13033338 | OPCML                                   | 3.34E-05    | 0.336226929 |
| cg07520649 | PCDHGA5;PCDHGA4;PCDHGA2;PCDHGB2;PCDHGB1 | 0.001147425 | 0.336217664 |
| cg21762695 |                                         | 0.000187194 | 0.336215722 |
| cg22283959 | NR2F2;NR2F2;NR2F2;NR2F2                 | 1.50E-05    | 0.336214267 |
| cg23357981 | GRP;GRP;GRP                             | 1.96E-05    | 0.336193596 |
| cg12176249 |                                         | 0.001147425 | 0.336180814 |
| cg17040303 | SIM2;SIM2                               | 0.000654035 | 0.336173997 |
| cg12356107 | FOXA2                                   | 0.000654035 | 0.336171214 |
| cg26468336 |                                         | 8.60E-06    | 0.336153908 |
| cg00338080 | SRRM3                                   | 0.000357885 | 0.336152777 |
| cg15920906 | CUX2                                    | 0.000537905 | 0.336141167 |
| cg26680520 |                                         | 0.000537905 | 0.336131012 |
| cg03860890 | EGFR;EGFR;EGFR;EGFR                     | 8.60E-06    | 0.336110717 |
| cg17446956 | SSH1;SSH1                               | 7.23E-05    | 0.336099539 |

|            |                                         |             |             |
|------------|-----------------------------------------|-------------|-------------|
| cg00714725 | CYP26C1                                 | 0.002714607 | 0.336095873 |
| cg12432010 | IQSEC3                                  | 1.50E-05    | 0.336094476 |
| cg08681432 | SCNN1G                                  | 0.001948248 | 0.336060512 |
| cg27099274 | C9orf125                                | 1.50E-05    | 0.336058221 |
| cg12661206 | DYNC111;DYNC111;DYNC111                 | 0.001639597 | 0.336054488 |
| cg11427855 |                                         | 0.000233422 | 0.33604705  |
| cg20203352 |                                         | 0.000290372 | 0.336013453 |
| cg19776201 | ZNF132;ZNF132                           | 7.23E-05    | 0.336007511 |
| cg09295081 | NTSR2                                   | 0.000117986 | 0.336004301 |
| cg01481544 |                                         | 1.50E-05    | 0.335990565 |
| cg26094984 | HECW2                                   | 9.24E-05    | 0.335986669 |
| cg17510957 | SORL1                                   | 1.96E-05    | 0.335986075 |
| cg13491481 | CADPS;CADPS;CADPS                       | 0.000654035 | 0.335960666 |
| cg08470180 | C5orf24;C5orf24                         | 0.000187194 | 0.335948233 |
| cg13316854 | HOXD3                                   | 1.50E-05    | 0.335937419 |
| cg16961816 | DLX6AS                                  | 0.000705485 | 0.335931332 |
| cg18913890 | CTNNA2;CTNNA2                           | 9.24E-05    | 0.335920868 |
| cg08091192 | ZIC4;ZIC4;ZIC4                          | 5.59E-05    | 0.335901461 |
| cg04541699 |                                         | 1.11E-05    | 0.335898787 |
| cg17078883 |                                         | 0.000357885 | 0.335883515 |
| cg09765089 |                                         | 0.003189589 | 0.335848349 |
| cg09794131 | HYDIN;HYDIN                             | 3.34E-05    | 0.33584603  |
| cg12065579 | NEUROG1                                 | 4.34E-05    | 0.335826396 |
| cg08650890 | TNXB                                    | 0.001376172 | 0.335774767 |
| cg24697184 | TTC22;TTC22                             | 9.24E-05    | 0.335772933 |
| cg03120091 | ADCY8;ADCY8                             | 1.11E-05    | 0.335763473 |
| cg24491784 |                                         | 0.000148457 | 0.335760191 |
| cg05906092 | SLC37A3;SLC37A3                         | 7.23E-05    | 0.335749842 |
| cg17832991 | OVOL2                                   | 3.34E-05    | 0.335748735 |
| cg00048759 | STAG3;GPC2                              | 8.60E-06    | 0.335729687 |
| cg01560972 | RIC3;RIC3                               | 5.59E-05    | 0.33571712  |
| cg12898019 | ST6GALNAC1                              | 0.000955793 | 0.335682963 |
| cg10548102 | MGST1;MGST1;MGST1                       | 4.34E-05    | 0.335682622 |
| cg08362738 | BDNF;BDNF;BDNF;BDNF;BDNF;BDNF;BDNF;BDNF | 8.60E-06    | 0.335672852 |
| cg13686615 |                                         | 0.0050758   | 0.335665968 |
| cg18519308 | ADAMTS12                                | 0.000117986 | 0.335634522 |
| cg18532215 | PLOD2;PLOD2                             | 1.11E-05    | 0.335622802 |
| cg19623624 | LOC619207                               | 5.59E-05    | 0.335622559 |
| cg23971170 | LMX1A                                   | 0.001639597 | 0.335622387 |
| cg08091050 |                                         | 0.000955793 | 0.335595992 |
| cg26597982 | TSNARE1                                 | 0.004357816 | 0.335591559 |
| cg00116699 | HDAC4                                   | 1.50E-05    | 0.335579308 |
| cg24664689 | XKR6                                    | 0.000187194 | 0.335571335 |
| cg02394955 | PPYR1                                   | 0.000148457 | 0.33556815  |
| cg13488811 |                                         | 0.000117986 | 0.335566552 |
| cg05131623 | PEX5L                                   | 4.34E-05    | 0.335565341 |
| cg01292810 |                                         | 0.001948248 | 0.335553836 |
| cg11228250 | PLA2R1;PLA2R1                           | 0.000233422 | 0.335551573 |
| cg27227742 | MATN4;MATN4;RBPJL;MATN4                 | 1.96E-05    | 0.335513111 |
| cg00841141 | SULT6B1                                 | 1.96E-05    | 0.335510055 |
| cg07681935 | NBLA00301;HAND2                         | 0.000791389 | 0.335503234 |
| cg03653541 | PDE4D;PDE4D                             | 0.00043997  | 0.335500898 |
| cg20044860 |                                         | 2.58E-05    | 0.335488749 |
| cg17307479 | BHLHE22                                 | 0.000955793 | 0.335486405 |
| cg19635571 |                                         | 8.60E-06    | 0.335486058 |
| cg03638905 |                                         | 0.000148457 | 0.335462932 |
| cg10251896 | CRABP1;CRABP1                           | 0.000290372 | 0.335456635 |
| cg00862116 | ABCB1                                   | 4.34E-05    | 0.33544042  |
| cg06252564 |                                         | 8.60E-06    | 0.335415765 |
| cg22978087 | NEFL;NEFL                               | 0.000537905 | 0.335415247 |

|            |                                                   |             |             |
|------------|---------------------------------------------------|-------------|-------------|
| cg02245612 | PTPRS;PTPRS;PTPRS;PTPRS                           | 0.000357885 | 0.335413392 |
| cg01793593 | ROBO1;ROBO1;ROBO1;ROBO1                           | 7.23E-05    | 0.335411303 |
| cg25711575 | PDE11A;PDE11A;PDE11A                              | 0.000233422 | 0.335406941 |
| cg16584573 | FGF8;FGF8;FGF8;FGF8                               | 2.58E-05    | 0.335386059 |
| cg01834210 | HAND1                                             | 0.000233422 | 0.335340516 |
| cg13067553 |                                                   | 0.000187194 | 0.335330173 |
| cg01427458 | OPCML                                             | 5.59E-05    | 0.335320027 |
| cg15074033 |                                                   | 0.000117986 | 0.335317056 |
| cg06873880 |                                                   | 1.50E-05    | 0.33531387  |
| cg24532471 | FAM181B                                           | 9.24E-05    | 0.335307352 |
| cg25557835 | SLC7A2;SLC7A2                                     | 0.000537905 | 0.335300035 |
| cg24376266 | FAM3B;FAM3B                                       | 0.000537905 | 0.335297859 |
| cg18115507 | NALCN                                             | 0.00043997  | 0.335296012 |
| cg23142799 | SHISA2                                            | 8.60E-06    | 0.335292031 |
| cg04557544 | SHISA9;SHISA9                                     | 0.002266401 | 0.335290121 |
| cg20597403 | SDK1;SDK1                                         | 0.00043997  | 0.335275812 |
| cg10055566 | NKAPL                                             | 8.60E-06    | 0.335268937 |
| cg03538436 | NOS1;NOS1                                         | 2.58E-05    | 0.335258253 |
| cg18691434 | STAG3;GPC2                                        | 1.96E-05    | 0.335251023 |
| cg01715455 | VSX1;VSX1                                         | 0.000148457 | 0.335249054 |
| cg02114924 | PCDH10;PCDH10                                     | 7.23E-05    | 0.335243435 |
| cg22387369 | ALPK3                                             | 0.000955793 | 0.335243163 |
| cg26955835 | DKK2;DKK2                                         | 0.000187194 | 0.335241762 |
| cg11500797 | DLX5                                              | 0.000955793 | 0.335226362 |
| cg21384203 | GSC2                                              | 3.34E-05    | 0.335220666 |
| cg15980539 | ESR1;ESR1;ESR1;ESR1;ESR1                          | 0.001147425 | 0.335218383 |
| cg06991510 | BDNF;BDNF;BDNF;BDNF;BDNF;BDNF;BDNF;BDNF;BDNF;BDNF | 4.34E-05    | 0.335207971 |
| cg19497501 | ZMAT4;ZMAT4                                       | 1.96E-05    | 0.335177173 |
| cg16375290 |                                                   | 9.24E-05    | 0.33517501  |
| cg15680755 |                                                   | 7.23E-05    | 0.335172075 |
| cg25180228 | LOC440905                                         | 1.50E-05    | 0.335157753 |
| cg08622198 | CHRM3                                             | 0.000791389 | 0.335141048 |
| cg12040846 | RUNDC3B;ABCB1;RUNDC3B;RUNDC3B                     | 2.58E-05    | 0.335123576 |
| cg09053907 | BTC                                               | 0.000654035 | 0.335099186 |
| cg15736169 |                                                   | 0.000117986 | 0.335090811 |
| cg23231515 | TEAD1                                             | 0.000955793 | 0.335088161 |
| cg02681733 | GOLGA7B                                           | 0.000290372 | 0.335081315 |
| cg26554353 |                                                   | 0.000537905 | 0.335065318 |
| cg06346335 |                                                   | 0.003734675 | 0.335055661 |
| cg03018496 | NR2F2                                             | 0.000357885 | 0.335053079 |
| cg01627405 | MIR1227;PLEKHJ1                                   | 0.001061731 | 0.335052733 |
| cg03445694 | LHX8                                              | 4.34E-05    | 0.335030082 |
| cg16462237 | ULK2;ULK2;ULK2;ULK2                               | 0.00043997  | 0.335012644 |
| cg07775371 | C16orf73;C16orf73;C16orf73                        | 1.11E-05    | 0.33500073  |
| cg15980656 | SDC2                                              | 0.002714607 | 0.33499255  |
| cg14631053 | SSTR4                                             | 2.58E-05    | 0.334991344 |
| cg13999106 | NRXN1;NRXN1                                       | 0.000233422 | 0.334988393 |
| cg13381486 | FAM123C;FAM123C;FAM123C;FAM123C                   | 7.23E-05    | 0.334984901 |
| cg08575049 | FAT4                                              | 8.60E-06    | 0.334972149 |
| cg20959866 | AJAP1;AJAP1                                       | 1.50E-05    | 0.334967984 |
| cg19035107 |                                                   | 1.11E-05    | 0.334945233 |
| cg08215532 | DPY19L2P4                                         | 9.24E-05    | 0.334944346 |
| cg11840125 | EFS;EFS                                           | 0.000122184 | 0.334937829 |
| cg16717713 | CCDC85C                                           | 0.00041966  | 0.334930028 |
| cg14165051 | PID1;PID1;PID1;PID1                               | 0.001147425 | 0.334926023 |
| cg07062043 | PHYHIPL;PHYHIPL                                   | 2.58E-05    | 0.334921322 |
| cg01688688 | PCDHB18                                           | 0.000233422 | 0.334901836 |
| cg00478246 | FAM84A                                            | 1.11E-05    | 0.334887128 |
| cg17634781 | SORBS2;SORBS2;SORBS2;SORBS2;SORBS2                | 2.58E-05    | 0.334854744 |
| cg03400421 |                                                   | 9.24E-05    | 0.334854588 |

|            |                                    |             |             |
|------------|------------------------------------|-------------|-------------|
| cg04865691 | SOX1;SOX1                          | 0.000654035 | 0.334828059 |
| cg07390122 | RSPO2                              | 5.59E-05    | 0.334822781 |
| cg22352772 |                                    | 0.000654035 | 0.334812612 |
| cg00532474 | PSTPIP2                            | 0.001147425 | 0.334796221 |
| cg06298519 | GFRA1;GFRA1;GFRA1                  | 0.000955793 | 0.334778925 |
| cg04390523 | EDNRB;EDNRB;EDNRB                  | 0.001147425 | 0.334755535 |
| cg06148736 |                                    | 0.000117986 | 0.334729447 |
| cg02757432 | GPR26                              | 8.60E-06    | 0.334722083 |
| cg24355907 |                                    | 1.11E-05    | 0.334711816 |
| cg15961744 | PCDHA6;PCDHA2;PCDHA1;PCDHA7;PCDHA1 | 1.11E-05    | 0.33470921  |
| cg15267010 | TOX2;TOX2;TOX2                     | 0.005742788 | 0.334705072 |
| cg01414464 |                                    | 0.000357885 | 0.334704339 |
| cg06029846 | PRMT8                              | 0.000791389 | 0.334697908 |
| cg08085357 | SOX2OT                             | 0.000290372 | 0.334691528 |
| cg14741939 | ZIC1                               | 2.58E-05    | 0.334682322 |
| cg20058043 | FZD10                              | 0.001147425 | 0.334674462 |
| cg02658730 |                                    | 4.34E-05    | 0.334670525 |
| cg22890950 | PPAPDC1A                           | 5.59E-05    | 0.33465643  |
| cg23549358 | NELL1;NELL1                        | 3.34E-05    | 0.334650199 |
| cg04098052 |                                    | 9.24E-05    | 0.334602141 |
| cg16115841 | ST6GAL2;ST6GAL2;ST6GAL2            | 3.21E-05    | 0.334599858 |
| cg22373221 | KIRREL3;KIRREL3;KIRREL3;KIRREL3    | 1.96E-05    | 0.334599832 |
| cg25634666 | FOLR3;FOLR3                        | 5.59E-05    | 0.3345966   |
| cg22275864 | ADRB3                              | 0.000866489 | 0.334583505 |
| cg25131922 | GPR177;GPR177                      | 1.11E-05    | 0.334576152 |
| cg14900984 | TDH                                | 0.000117986 | 0.334561762 |
| cg20165381 | CD164L2                            | 0.002304201 | 0.334551029 |
| cg00980319 | MMEL1                              | 7.23E-05    | 0.334548341 |
| cg05873889 | SERP2;SERP2                        | 1.11E-05    | 0.334518135 |
| cg10327400 | LRFN5                              | 0.000148457 | 0.334512313 |
| cg10341556 | RGS20;RGS20                        | 9.24E-05    | 0.33449903  |
| cg25226247 | TFAP2B                             | 7.23E-05    | 0.33448725  |
| cg25900280 | TBX4                               | 0.000187194 | 0.33448055  |
| cg24304249 | CACNA1E                            | 8.60E-06    | 0.334458918 |
| cg17657179 | HAS1                               | 0.000233422 | 0.334446962 |
| cg01047904 | PDE3A                              | 0.000290372 | 0.334439894 |
| cg23296792 | FBXO38;FBXO38                      | 0.001948248 | 0.334434116 |
| cg09493505 | VWC2                               | 0.005897668 | 0.334429369 |
| cg08599259 | POU3F1;POU3F1                      | 0.000290372 | 0.334427118 |
| cg18498593 | HOXB13                             | 4.34E-05    | 0.334424006 |
| cg08280468 | SHISA9;SHISA9                      | 7.23E-05    | 0.334417853 |
| cg02688118 |                                    | 2.58E-05    | 0.334416305 |
| cg09308336 | ACADL                              | 8.60E-06    | 0.334398708 |
| cg00955307 | ILDR2                              | 4.34E-05    | 0.334396232 |
| cg09295573 | KIAA1239                           | 0.000290372 | 0.334378803 |
| cg08499861 |                                    | 1.96E-05    | 0.334376332 |
| cg06362543 |                                    | 4.34E-05    | 0.334365001 |
| cg03169508 |                                    | 5.59E-05    | 0.334355645 |
| cg15946653 | ANKK1                              | 1.96E-05    | 0.33434646  |
| cg00750428 |                                    | 8.60E-06    | 0.334344677 |
| cg22526531 | KIAA0319L                          | 1.50E-05    | 0.334342951 |
| cg00945293 | FLJ42875;PRDM16;PRDM16;FLJ42875    | 0.000537905 | 0.334308748 |
| cg03529568 | ZNF207;MIR632;ZNF207;ZNF207        | 5.59E-05    | 0.334306622 |
| cg23556533 | FAM83H                             | 1.96E-05    | 0.334303133 |
| cg19047804 | TRIM39;TRIM39                      | 4.34E-05    | 0.334300839 |
| cg07621104 | DSCAML1                            | 0.000148457 | 0.334298523 |
| cg05740045 |                                    | 4.34E-05    | 0.334283971 |
| cg20920097 |                                    | 4.34E-05    | 0.334276565 |
| cg17171539 |                                    | 0.001376172 | 0.33427108  |
| cg09714778 |                                    | 9.24E-05    | 0.334262248 |

|            |                                         |             |             |
|------------|-----------------------------------------|-------------|-------------|
| cg18006637 | FAM13A;FAM13A                           | 0.000233422 | 0.33425649  |
| cg13844341 | MAD1L1;MAD1L1;MAD1L1                    | 2.58E-05    | 0.334249356 |
| cg17830985 | SHISA2                                  | 4.34E-05    | 0.334220752 |
| cg09177131 | SYT6;SYT6                               | 0.000262362 | 0.334200306 |
| cg21915313 | PCDHGA4;PCDHGA6;PCDHGA1;PCDHGA5;PCDHGA1 | 5.59E-05    | 0.334194341 |
| cg27262735 | TLE6;TLE6                               | 4.34E-05    | 0.334186457 |
| cg20116199 | C12orf56;C12orf56                       | 0.000955793 | 0.334186285 |
| cg19267252 |                                         | 3.34E-05    | 0.334175082 |
| cg17262810 | CCNY;CCNY                               | 0.00043997  | 0.334163967 |
| cg12213062 | SPEG                                    | 0.000187194 | 0.334162588 |
| cg09193347 | RASGRF1;RASGRF1                         | 0.000654035 | 0.334159667 |
| cg00112685 | ELAVL3;ELAVL3                           | 0.00043997  | 0.334159252 |
| cg00528572 | MTNR1B                                  | 0.000357885 | 0.334158521 |
| cg14650577 | TACR1;TACR1                             | 0.000791389 | 0.334140654 |
| cg27572072 | ADAP1                                   | 0.000357885 | 0.334124524 |
| cg21179457 | INSM2                                   | 0.000148457 | 0.334122975 |
| cg13733410 | VWDE;VWDE                               | 9.24E-05    | 0.334114905 |
| cg27520776 | ESRRG                                   | 0.000570759 | 0.334108897 |
| cg20335425 | S100A8                                  | 1.96E-05    | 0.334099931 |
| cg22125805 |                                         | 0.001376172 | 0.334094564 |
| cg13216057 | DKK3;DKK3;DKK3                          | 0.000117986 | 0.334093529 |
| cg04853843 | IRX6                                    | 2.58E-05    | 0.334085553 |
| cg04349839 | SEL1L3                                  | 0.000187194 | 0.334082524 |
| cg14249348 | ZAR1                                    | 0.00043997  | 0.334071157 |
| cg19106932 |                                         | 0.006409488 | 0.334055531 |
| cg03497399 | SUSD5                                   | 0.00043997  | 0.334045384 |
| cg04615460 |                                         | 7.23E-05    | 0.334026573 |
| cg10237044 | LHX8                                    | 8.60E-06    | 0.334006105 |
| cg22400166 | C14orf23;C14orf23                       | 7.23E-05    | 0.334003764 |
| cg02326566 | PCDHA6;PCDHA2;PCDHA1;PCDHA7;PCDHA1      | 0.000117986 | 0.334001106 |
| cg26880055 | RIPPLY2;RIPPLY2                         | 8.60E-06    | 0.333992987 |
| cg10526374 | ASCL2                                   | 0.002450672 | 0.333992637 |
| cg10838789 | LRRC67                                  | 0.000791389 | 0.333992461 |
| cg13004927 | SLC47A1                                 | 0.000290372 | 0.333978779 |
| cg17383727 | GDNF;GDNF;GDNF                          | 0.001147425 | 0.333973625 |
| cg16344234 | SEC14L5                                 | 0.000955793 | 0.333966624 |
| cg22409727 |                                         | 0.000290372 | 0.333942571 |
| cg01287132 |                                         | 0.000290372 | 0.333942194 |
| cg02085507 | TRIP10                                  | 0.000148457 | 0.333928428 |
| cg01953658 |                                         | 0.000122184 | 0.333927085 |
| cg17789273 |                                         | 1.50E-05    | 0.333893414 |
| cg16656895 | EMX2;EMX2;EMX2OS                        | 1.11E-05    | 0.333856042 |
| cg20647467 | FEZF1;FEZF1                             | 1.11E-05    | 0.333844807 |
| cg10764541 | INSM2                                   | 0.000117986 | 0.333843806 |
| cg05569086 | LYNX1;LYNX1;LYNX1;LYNX1;LYNX1;LYNX1     | 4.34E-05    | 0.333835708 |
| cg04330683 |                                         | 1.96E-05    | 0.333828285 |
| cg14765959 |                                         | 0.003734675 | 0.333821183 |
| cg09644153 |                                         | 8.60E-06    | 0.333799966 |
| cg24504014 |                                         | 9.24E-05    | 0.333792534 |
| cg14492800 | GDNF                                    | 0.002304201 | 0.3337904   |
| cg13300273 | GPR25                                   | 0.007873393 | 0.33377878  |
| cg18825419 | ABI1;ABI1;ABI1;ABI1                     | 0.002714607 | 0.333768018 |
| cg25536373 | DPP10;DPP10                             | 0.000357885 | 0.333762896 |
| cg07139301 | SLC2A2                                  | 4.34E-05    | 0.333760739 |
| cg16864658 | CCK                                     | 0.001147425 | 0.33376025  |
| cg04731544 | LMTK3                                   | 0.000117986 | 0.333756996 |
| cg04894537 | KCNQ1;KCNQ1                             | 0.000233422 | 0.333755419 |
| cg20541178 | LYNX1;LYNX1;LYNX1;LYNX1;LYNX1           | 4.34E-05    | 0.333728695 |
| cg18734842 | FAM176A;FAM176A                         | 7.23E-05    | 0.333724989 |
| cg25332377 | CCDC108;CCDC108                         | 5.59E-05    | 0.33371365  |

|            |                                   |             |             |
|------------|-----------------------------------|-------------|-------------|
| cg02005873 |                                   | 0.000357885 | 0.333713591 |
| cg16879574 | NHLRC1                            | 2.58E-05    | 0.333679798 |
| cg26313511 | ZNF148                            | 0.000187194 | 0.333675642 |
| cg20283477 |                                   | 7.23E-05    | 0.333663518 |
| cg14219290 | EGLN3                             | 0.007873393 | 0.333655527 |
| cg22232500 | NCKAP5;NCKAP5                     | 2.58E-05    | 0.333654621 |
| cg05824050 |                                   | 0.000537905 | 0.333644911 |
| cg01935149 |                                   | 0.000233422 | 0.333619959 |
| cg06881398 | USP24                             | 0.000290372 | 0.333616286 |
| cg18111500 |                                   | 0.000233422 | 0.33361295  |
| cg20806345 | NEUROD1                           | 8.60E-06    | 0.333598502 |
| cg03878133 | FIGN                              | 5.59E-05    | 0.333584631 |
| cg12467264 |                                   | 0.000187194 | 0.333582735 |
| cg02366534 | ME1                               | 4.34E-05    | 0.333570388 |
| cg20048037 | ENPP2;ENPP2;ENPP2                 | 0.000654035 | 0.333558828 |
| cg17170568 | C7orf13;RNF32;RNF32               | 7.23E-05    | 0.333554888 |
| cg03663215 | ADCY2                             | 2.58E-05    | 0.333549145 |
| cg18575770 | TBX3;TBX3;TBX3;TBX3               | 0.000357885 | 0.33354558  |
| cg26495109 | LOC283856;GNAO1;GNAO1;GNAO1;GNAO1 | 0.000187194 | 0.333537621 |
| cg21113773 |                                   | 8.60E-06    | 0.333535038 |
| cg16899179 | NCOA2                             | 0.000148457 | 0.333533181 |
| cg05722981 |                                   | 8.60E-06    | 0.333532224 |
| cg22374057 | FAM38B;FAM38B                     | 2.58E-05    | 0.333506777 |
| cg14598373 |                                   | 0.000357885 | 0.333493451 |
| cg18537222 | PPARG;PPARG;PPARG;PPARG           | 0.001948248 | 0.333488571 |
| cg11821817 | KIAA1024                          | 9.24E-05    | 0.333475698 |
| cg07243784 | WWC1;WWC1;WWC1                    | 0.000654035 | 0.333471076 |
| cg04361126 | SLC40A1                           | 0.000290372 | 0.333466322 |
| cg20819482 | TNKS                              | 0.000148457 | 0.33346071  |
| cg23303408 | POU4F3;POU4F3                     | 3.34E-05    | 0.333454482 |
| cg05060949 | MNX1;MNX1                         | 0.00043997  | 0.333450246 |
| cg08287265 | NKX2-3;NKX2-3                     | 3.34E-05    | 0.33345011  |
| cg27353143 |                                   | 0.000187194 | 0.333422385 |
| cg13474450 | SLC45A4                           | 4.34E-05    | 0.333381807 |
| cg17416793 | KCNQ1;KCNQ1                       | 3.34E-05    | 0.333376926 |
| cg11322464 | TPD52L1;TPD52L1;TPD52L1;TPD52L1   | 7.23E-05    | 0.333358669 |
| cg03593550 | CACNG8;MIR935                     | 0.001948248 | 0.333336986 |
| cg25537669 | NPHS1                             | 0.000290372 | 0.333330232 |
| cg01129459 |                                   | 1.50E-05    | 0.333294437 |
| cg26521404 | HOXA9                             | 0.00043997  | 0.333288732 |
| cg14762973 | ZSWIM2                            | 9.24E-05    | 0.333286984 |
| cg19710326 | DTNB;DTNB;DTNB;DTNB;DTNB          | 2.58E-05    | 0.333272042 |
| cg11833968 |                                   | 4.34E-05    | 0.333266563 |
| cg14515812 | RAP1GAP;RAP1GAP;RAP1GAP           | 0.000866489 | 0.333252787 |
| cg24876786 | ZFR2;ZFR2;ZFR2                    | 3.34E-05    | 0.333252422 |
| cg22587602 | EGR4;EGR4                         | 0.001376172 | 0.333242939 |
| cg23154059 | WNT6                              | 0.000537905 | 0.333239194 |
| cg00691123 | VGLL4;VGLL4                       | 0.000117986 | 0.333231635 |
| cg18703601 | ROBO1                             | 2.58E-05    | 0.333217531 |
| cg23637314 | ESRRG;ESRRG;ESRRG;ESRRG;ESRRG     | 7.23E-05    | 0.333215768 |
| cg08066875 |                                   | 2.58E-05    | 0.333208396 |
| cg25431220 | TOM1L1                            | 7.23E-05    | 0.333204948 |
| cg04116766 |                                   | 0.000290372 | 0.333181185 |
| cg23089838 | C8orf48;C8orf48                   | 1.11E-05    | 0.333171027 |
| cg04277560 | CADPS2;CADPS2;CADPS2              | 5.59E-05    | 0.333163078 |
| cg00903099 | HTR5A                             | 0.000537905 | 0.33315723  |
| cg10298052 |                                   | 0.001376172 | 0.333143372 |
| cg10539507 | NKX6-1                            | 0.000357885 | 0.333134799 |
| cg10148764 | RPL31;RPL31;RPL31                 | 3.34E-05    | 0.333127739 |
| cg09413950 | LOC440040                         | 7.23E-05    | 0.333098089 |

|            |                                         |             |             |
|------------|-----------------------------------------|-------------|-------------|
| cg13588023 | RIPK4;RIPK4                             | 5.59E-05    | 0.333096367 |
| cg26535158 | NKIRAS2;NKIRAS2;NKIRAS2;NKIRAS2;NKIRAS2 | 0.000117986 | 0.333095731 |
| cg15448975 | CRMP1                                   | 9.24E-05    | 0.333095667 |
| cg20643029 | CLDN14;CLDN14                           | 0.001639597 | 0.333086535 |
| cg14345128 | ONECUT2                                 | 0.003734675 | 0.33305703  |
| cg02434314 |                                         | 0.000117986 | 0.333043358 |
| cg05585303 | RPH3A;RPH3A;RPH3A;RPH3A                 | 3.34E-05    | 0.333034993 |
| cg05491001 |                                         | 0.000955793 | 0.333029382 |
| cg07472704 | F7;F7                                   | 1.11E-05    | 0.333028439 |
| cg04910921 |                                         | 0.000233422 | 0.333028397 |
| cg14277923 | LHX3;LHX3                               | 7.23E-05    | 0.333020615 |
| cg08545129 |                                         | 5.59E-05    | 0.333019237 |
| cg23024047 |                                         | 7.23E-05    | 0.333005264 |
| cg06630413 | HOXC11                                  | 0.00043997  | 0.332977921 |
| cg13413384 | RXRA                                    | 5.59E-05    | 0.332966992 |
| cg17006136 | SORBS2;SORBS2;SORBS2;SORBS2;SORBS2      | 0.000654035 | 0.332955459 |
| cg01084154 |                                         | 7.23E-05    | 0.332945701 |
| cg05783854 | PCDHAC2;PCDHA7;PCDHA12;PCDHA6;PCDHA5    | 2.58E-05    | 0.332941043 |
| cg18065811 | HELT                                    | 3.34E-05    | 0.332935366 |
| cg24767956 |                                         | 8.60E-06    | 0.332929956 |
| cg02694099 | CT62                                    | 1.11E-05    | 0.332927046 |
| cg13610307 | CACNA1B                                 | 0.000290372 | 0.332897294 |
| cg02162286 |                                         | 0.000117986 | 0.332895306 |
| cg06620896 |                                         | 5.59E-05    | 0.332885611 |
| cg03678062 | ZC3H12D                                 | 9.24E-05    | 0.332879049 |
| cg06794000 | LMO3;LMO3;LMO3                          | 5.59E-05    | 0.332875251 |
| cg27657429 | ARHGAP22;ARHGAP22                       | 0.000537905 | 0.332871671 |
| cg24138857 | TNXB                                    | 1.50E-05    | 0.332871654 |
| cg27252164 | ASCL2                                   | 0.000290372 | 0.332864828 |
| cg19800670 |                                         | 8.60E-06    | 0.332848559 |
| cg16087447 | PRICKLE1                                | 0.000654035 | 0.332837404 |
| cg13222915 |                                         | 8.60E-06    | 0.332835134 |
| cg23261443 | CUX1;CUX1;CUX1                          | 0.000187194 | 0.332834972 |
| cg14099514 | PLCXD3                                  | 1.96E-05    | 0.33282576  |
| cg06341749 | PCOLCE2                                 | 0.001376172 | 0.332806233 |
| cg18926108 | PCDHGA4;PCDHGA6;PCDHGA1;PCDHGA5;PCDHGA3 | 8.60E-06    | 0.332806146 |
| cg15370180 |                                         | 9.24E-05    | 0.332799806 |
| cg19355186 |                                         | 4.34E-05    | 0.332798376 |
| cg22253838 | CT62                                    | 0.000654035 | 0.332796444 |
| cg03387135 | MIR124-3                                | 0.0050758   | 0.332790674 |
| cg23976652 |                                         | 4.34E-05    | 0.332787585 |
| cg07976644 | TTC22;TTC22;TTC22;TTC22                 | 0.000526175 | 0.332784894 |
| cg12346592 |                                         | 0.000290372 | 0.332767162 |
| cg01458605 | ZIC1                                    | 0.00043997  | 0.332764851 |
| cg22750155 | STMN2                                   | 7.23E-05    | 0.332762788 |
| cg17787084 | LMX1A                                   | 1.96E-05    | 0.332746939 |
| cg08973191 | SCRIB;SCRIB                             | 9.24E-05    | 0.332734085 |
| cg18096722 |                                         | 9.24E-05    | 0.332728656 |
| cg05473871 | ADAMTSL5                                | 0.007873393 | 0.33272088  |
| cg13917662 | CLYBL                                   | 0.001639597 | 0.332707278 |
| cg16571983 | EDNRB;EDNRB;EDNRB;EDNRB;EDNRB           | 0.000791389 | 0.332703927 |
| cg10514097 | FOXF1                                   | 0.000148457 | 0.332691664 |
| cg26067760 | HPSE2;HPSE2;HPSE2;HPSE2                 | 0.000290372 | 0.332688425 |
| cg23866916 | SBNO2                                   | 1.11E-05    | 0.332675712 |
| cg20748065 | POR                                     | 9.24E-05    | 0.332675545 |
| cg11384848 | SPSB4                                   | 0.000357885 | 0.332667153 |
| cg17670496 | HCG4                                    | 3.34E-05    | 0.332663664 |
| cg11908751 | SYT12                                   | 0.000791389 | 0.332647922 |
| cg09105881 | ABCB1                                   | 1.11E-05    | 0.332644012 |
| cg07902789 | PRDM16;PRDM16                           | 4.34E-05    | 0.33263153  |

|            |                                     |             |             |
|------------|-------------------------------------|-------------|-------------|
| cg12369353 |                                     | 0.000117986 | 0.332626157 |
| cg09271157 | PPAPDC1A                            | 5.59E-05    | 0.332624681 |
| cg03052004 |                                     | 4.34E-05    | 0.332610511 |
| cg04466549 |                                     | 1.11E-05    | 0.332587501 |
| cg11368617 |                                     | 1.96E-05    | 0.332582596 |
| cg20464246 | ESRRG;ESRRG;ESRRG;ESRRG;ESRRG       | 0.000148457 | 0.33258097  |
| cg08080396 |                                     | 0.000357885 | 0.332576962 |
| cg09326345 | MARVELD3;MARVELD3                   | 1.96E-05    | 0.332565757 |
| cg08832603 | DLX5                                | 0.000791389 | 0.332563343 |
| cg02747950 | RAB8B                               | 0.001376172 | 0.332563241 |
| cg00730653 | WNT7A                               | 0.00043997  | 0.332548688 |
| cg15105359 | TNS3                                | 0.003189589 | 0.332532645 |
| cg14135814 | SRRM4                               | 0.000537905 | 0.332526852 |
| cg07436152 |                                     | 1.96E-05    | 0.332520044 |
| cg12951296 |                                     | 1.96E-05    | 0.332499959 |
| cg24841257 | SNX7;SNX7                           | 0.000233422 | 0.332491643 |
| cg04753583 |                                     | 0.000117986 | 0.332473591 |
| cg02760031 | TCF15                               | 0.000148457 | 0.332471182 |
| cg26599006 | GSC2                                | 0.000290372 | 0.332455606 |
| cg08164191 |                                     | 0.000791389 | 0.332427245 |
| cg08248516 | HOXA7                               | 0.0050758   | 0.332402497 |
| cg07760204 |                                     | 8.60E-06    | 0.332399176 |
| cg10113101 | SCRN1;SCRN1;SCRN1;SCRN1             | 3.34E-05    | 0.332398193 |
| cg11016563 | TRPC6;TRPC6                         | 1.11E-05    | 0.332389161 |
| cg00916536 | CD8A;CD8A;CD8A;CD8A                 | 7.23E-05    | 0.332388238 |
| cg01064918 | SLC24A4;SLC24A4;SLC24A4;SLC24A4     | 0.000537905 | 0.332376826 |
| cg21838979 | C2orf40                             | 7.23E-05    | 0.332366734 |
| cg22287014 |                                     | 4.34E-05    | 0.332354822 |
| cg17404534 | DAGLB;DAGLB                         | 4.34E-05    | 0.332351933 |
| cg09195098 | GCNT2                               | 0.006823935 | 0.332349702 |
| cg18533201 | GDF6                                | 0.000357885 | 0.332346034 |
| cg27139419 | IGF1R                               | 0.00043997  | 0.332328727 |
| cg19063972 | SOX21                               | 4.34E-05    | 0.33232474  |
| cg07835051 | RAX                                 | 1.96E-05    | 0.332309063 |
| cg20129213 | RIMS2                               | 0.000526175 | 0.332290789 |
| cg18193094 | GRIK2;GRIK2;GRIK2;GRIK2;GRIK2;GRIK2 | 8.60E-06    | 0.332290714 |
| cg25912580 |                                     | 0.000117986 | 0.332288263 |
| cg24159514 | ZNF833                              | 0.00043997  | 0.33227375  |
| cg16206838 | SLC25A26                            | 2.58E-05    | 0.332268071 |
| cg21912653 | NDFIP2;NDFIP2                       | 3.34E-05    | 0.332267176 |
| cg26514552 | C4BPA                               | 5.59E-05    | 0.332259716 |
| cg19768329 | ZNF697;ZNF697                       | 0.000654035 | 0.332255996 |
| cg11362010 | SOX2OT                              | 2.58E-05    | 0.332249039 |
| cg00505045 | POU4F2                              | 5.59E-05    | 0.332240127 |
| cg21051972 |                                     | 4.34E-05    | 0.332237171 |
| cg01798589 | STAC                                | 0.000187194 | 0.332236655 |
| cg08863777 | FUT4                                | 0.000187194 | 0.332213155 |
| cg10144400 |                                     | 1.50E-05    | 0.332198836 |
| cg23562261 | EFCAB1;EFCAB1;EFCAB1;EFCAB1;EFCAB1  | 4.34E-05    | 0.332198227 |
| cg19899882 | FOXQ1                               | 8.60E-06    | 0.332196474 |
| cg00719651 |                                     | 8.60E-06    | 0.332192532 |
| cg04768935 |                                     | 1.96E-05    | 0.332157322 |
| cg01371799 |                                     | 2.58E-05    | 0.332154244 |
| cg24986840 |                                     | 0.000148457 | 0.332136797 |
| cg15046877 | OPCML                               | 0.00043997  | 0.332120321 |
| cg12544974 | SNCAIP                              | 0.00043997  | 0.332111578 |
| cg03781931 | ALX1                                | 8.60E-06    | 0.332103312 |
| cg14346243 | SNCA;SNCA;SNCA;SNCA                 | 4.34E-05    | 0.332092275 |
| cg18331412 | TGFBI                               | 2.58E-05    | 0.332078495 |
| cg09150076 | TRIM67                              | 5.59E-05    | 0.33207427  |



|            |                                      |             |             |
|------------|--------------------------------------|-------------|-------------|
| cg04095724 | SLITRK1;SLITRK1                      | 3.21E-05    | 0.332068779 |
| cg25326048 |                                      | 1.96E-05    | 0.332066643 |
| cg00225858 | ADAD2;ADAD2                          | 9.24E-05    | 0.332052128 |
| cg14420245 | ACVR2A                               | 0.001147425 | 0.332043791 |
| cg20098659 | CLEC9A;CLEC9A                        | 3.21E-05    | 0.332042508 |
| cg17394623 | CARS2                                | 0.000791389 | 0.332039899 |
| cg26164577 | SNRPF                                | 0.002714607 | 0.332036628 |
| cg25627263 | OSBPL5;OSBPL5;OSBPL5                 | 0.000290372 | 0.332008326 |
| cg25188032 | SLITRK1                              | 1.11E-05    | 0.332003275 |
| cg12745764 | ZNF804B                              | 0.000396647 | 0.331980199 |
| cg18468354 |                                      | 9.24E-05    | 0.331972203 |
| cg17449954 | HEYL                                 | 0.004357816 | 0.331969668 |
| cg08640046 |                                      | 4.34E-05    | 0.331945755 |
| cg12697442 | YAP1;YAP1                            | 0.001639597 | 0.331922296 |
| cg01072639 | CHGB                                 | 5.59E-05    | 0.331917417 |
| cg00971695 |                                      | 1.96E-05    | 0.331913324 |
| cg00450824 | STK33                                | 0.00043997  | 0.331907054 |
| cg00777627 | PDE10A;PDE10A                        | 0.00043997  | 0.331905431 |
| cg03291835 | COL4A1                               | 8.60E-06    | 0.331902713 |
| cg02825171 | DACT2                                | 1.96E-05    | 0.331890733 |
| cg09572169 | PLEKHA7                              | 1.11E-05    | 0.331882097 |
| cg07095530 | ZNHIT1;PLOD3                         | 5.59E-05    | 0.331881528 |
| cg24139737 | C10orf72;C10orf72                    | 5.59E-05    | 0.331870087 |
| cg27203560 |                                      | 0.000148457 | 0.33186547  |
| cg15379858 | CSGALNACT1;CSGALNACT1                | 1.50E-05    | 0.331856659 |
| cg12422688 |                                      | 0.000117986 | 0.331846845 |
| cg01821022 | PPHLN1;PPHLN1;PPHLN1;PPHLN1;PPHLN1;P | 0.007873393 | 0.331846685 |
| cg26982279 | ZNF470;ZNF470                        | 0.000148457 | 0.331842101 |
| cg13870990 | DSC2;DSC2                            | 0.001639597 | 0.331838125 |
| cg00883212 | RAPGEF4;RAPGEF4                      | 0.000117986 | 0.331835759 |
| cg01287000 |                                      | 8.60E-06    | 0.331812319 |
| cg02403883 | PCDHB6                               | 2.58E-05    | 0.331805439 |
| cg18474742 | SAMD5                                | 9.24E-05    | 0.331799249 |
| cg13079123 |                                      | 0.004357816 | 0.331794002 |
| cg04169021 |                                      | 0.000117986 | 0.331790807 |
| cg13884903 | C20orf56                             | 0.001147425 | 0.331789657 |
| cg00630724 | PITX3                                | 9.24E-05    | 0.331788564 |
| cg11282657 | TSPAN10                              | 3.34E-05    | 0.331785476 |
| cg00950846 | CDH8                                 | 9.24E-05    | 0.331785165 |
| cg16301890 | EMX2;EMX2OS;EMX2                     | 4.34E-05    | 0.331782152 |
| cg09988118 | TBX18                                | 0.000117986 | 0.331767809 |
| cg01541645 |                                      | 2.58E-05    | 0.331759169 |
| cg00876757 |                                      | 0.000117986 | 0.331738414 |
| cg14472390 | PCDHGA4;PCDHGA2;PCDHGB2;PCDHGA1;PC   | 5.59E-05    | 0.331735817 |
| cg16997364 |                                      | 5.11E-05    | 0.331735163 |
| cg01299579 | NOL10                                | 0.001948248 | 0.331714142 |
| cg07434402 | DLG2;DLG2                            | 0.002714607 | 0.331707564 |
| cg26547816 | ARHGAP26;ARHGAP26                    | 0.000148457 | 0.331704673 |
| cg03789420 | CADM3;CADM3                          | 5.59E-05    | 0.331700945 |
| cg11235498 | SPSB4                                | 0.000654035 | 0.331700437 |
| cg09803407 | KIRREL3;KIRREL3                      | 0.001376172 | 0.331698448 |
| cg09076788 | ITPRIPL2;ITPRIPL2                    | 0.001639597 | 0.331684561 |
| cg01407406 | ADAMTS18                             | 0.000117986 | 0.331683602 |
| cg08899523 | FGFR2;FGFR2;FGFR2;FGFR2;FGFR2;FGFR2; | 8.60E-06    | 0.331680839 |
| cg06493386 | TRPA1;TRPA1                          | 4.34E-05    | 0.331667545 |
| cg25181710 | ASXL2                                | 0.003189589 | 0.331646237 |
| cg11965370 | NTM;NTM;NTM;NTM;NTM;NTM;NTM          | 7.23E-05    | 0.331639276 |
| cg04603391 |                                      | 5.59E-05    | 0.331623932 |
| cg01663603 | KCNB1                                | 0.000187194 | 0.331618332 |
| cg20979799 | RFX6                                 | 1.96E-05    | 0.331615807 |

|            |                                           |             |             |
|------------|-------------------------------------------|-------------|-------------|
| cg20775959 | ARNT2                                     | 7.23E-05    | 0.331591038 |
| cg18099189 |                                           | 7.23E-05    | 0.331577675 |
| cg24890104 |                                           | 0.000148457 | 0.331562339 |
| cg18597883 | C10orf41;ZNF503;C10orf41                  | 9.24E-05    | 0.331557103 |
| cg27641532 |                                           | 4.34E-05    | 0.331547427 |
| cg06110728 | NELL2;NELL2;NELL2;NELL2;NELL2             | 0.000537905 | 0.331543354 |
| cg15703632 | PAX3;PAX3;PAX3;CCDC140;PAX3;PAX3;PAX3     | 5.59E-05    | 0.331543007 |
| cg18443629 | GALR1                                     | 4.34E-05    | 0.331522713 |
| cg03109101 | EMX2;EMX2;EMX2OS                          | 0.000187194 | 0.331506632 |
| cg01658421 | EVX2                                      | 0.000148457 | 0.331502037 |
| cg13728797 |                                           | 2.58E-05    | 0.331495889 |
| cg22287067 | NOL4                                      | 3.34E-05    | 0.331490088 |
| cg05241355 | OTX2                                      | 0.000290372 | 0.331487299 |
| cg06234167 | PHF21B;PHF21B                             | 3.34E-05    | 0.331483988 |
| cg20241876 | NOTCH4                                    | 0.000117986 | 0.331483891 |
| cg10126409 | PRRX1;PRRX1                               | 9.24E-05    | 0.331480165 |
| cg08354889 | DEPDC7;DEPDC7                             | 0.000654035 | 0.331471524 |
| cg22356339 | ASCL1                                     | 0.000233422 | 0.331465644 |
| cg25101396 | ABHD1                                     | 9.24E-05    | 0.331464664 |
| cg25399352 | TBX5;TBX5;TBX5;TBX5                       | 0.001376172 | 0.331453951 |
| cg12062099 | WDR63                                     | 0.000791389 | 0.331438244 |
| cg01288724 | ARHGAP26;ARHGAP26                         | 0.002714607 | 0.331419417 |
| cg10323552 | PCDH8;PCDH8                               | 0.000654035 | 0.331419033 |
| cg05596265 | CNTN4                                     | 1.11E-05    | 0.331411666 |
| cg12146864 | LRP1                                      | 0.001948248 | 0.331404738 |
| cg26248284 | LIMCH1;LIMCH1;LIMCH1;LIMCH1;LIMCH1;LIMCH1 | 0.00043997  | 0.331402403 |
| cg16203125 | ONECUT1                                   | 0.000117986 | 0.331401419 |
| cg00333226 | VWC2                                      | 0.001376172 | 0.331390743 |
| cg25063151 | MXRA8                                     | 0.004357816 | 0.331387721 |
| cg05923226 | CCDC105                                   | 8.60E-06    | 0.331383538 |
| cg25724895 | C20orf197                                 | 0.000233422 | 0.331382434 |
| cg09678615 | TOX3;TOX3                                 | 3.34E-05    | 0.331377363 |
| cg06616081 | TSPAN3;TSPAN3;TSPAN3                      | 1.50E-05    | 0.331371982 |
| cg07151747 | UPP2;UPP2                                 | 0.000148457 | 0.331369213 |
| cg10715265 | DAB1                                      | 0.000357885 | 0.331361402 |
| cg25443851 |                                           | 0.002304201 | 0.331356014 |
| cg10582968 | CCDC33                                    | 0.000955793 | 0.331355569 |
| cg23677243 | MEIS2;MEIS2;MEIS2;MEIS2;MEIS2;MEIS2;MEIS2 | 4.34E-05    | 0.331353764 |
| cg12215340 | ADRA1D;ADRA1D                             | 0.000187194 | 0.331350232 |
| cg25456849 | ANKRD34C;ANKRD34C                         | 0.000290372 | 0.331344858 |
| cg20585038 |                                           | 4.34E-05    | 0.331344382 |
| cg05604874 |                                           | 0.000357885 | 0.331332281 |
| cg01817029 | LOC283392;TRHDE;LOC283392                 | 5.59E-05    | 0.331325168 |
| cg16772035 | ABCB1                                     | 1.11E-05    | 0.331306812 |
| cg05876918 | PIP4K2C;PIP4K2C;PIP4K2C;PIP4K2C           | 5.59E-05    | 0.331271435 |
| cg12212311 |                                           | 0.000654035 | 0.331267084 |
| cg12648520 |                                           | 0.000117986 | 0.3312624   |
| cg04373435 | CTNNA2;CTNNA2                             | 0.000233422 | 0.331231847 |
| cg02526986 | RFX6                                      | 1.11E-05    | 0.331209331 |
| cg00745231 | PRIMA1                                    | 5.59E-05    | 0.331198134 |
| cg12009759 | HHIPL1;HHIPL1                             | 0.000290372 | 0.331191803 |
| cg06188670 | DKK3;DKK3;DKK3                            | 0.002304201 | 0.331164658 |
| cg25626427 |                                           | 0.000187194 | 0.331149839 |
| cg25961205 | GRTP1                                     | 7.23E-05    | 0.331146861 |
| cg05758246 | TFAP2A;TFAP2A;TFAP2A                      | 1.50E-05    | 0.331136863 |
| cg17418743 |                                           | 0.000955793 | 0.33113012  |
| cg25674286 | ADORA3;ADORA3;ADORA3                      | 7.23E-05    | 0.331119474 |
| cg00616687 | SIM2;SIM2                                 | 0.003734675 | 0.331115423 |
| cg05236879 |                                           | 7.23E-05    | 0.331101701 |
| cg03817939 | FAM176A;FAM176A                           | 0.0050758   | 0.331100276 |

|            |                                         |             |             |
|------------|-----------------------------------------|-------------|-------------|
| cg14609025 |                                         | 0.000187194 | 0.331078754 |
| cg02509086 |                                         | 0.000148457 | 0.331065161 |
| cg24155384 |                                         | 3.34E-05    | 0.331064933 |
| cg11092616 | RIMS1                                   | 0.000357885 | 0.33106478  |
| cg04891053 | PVRL4                                   | 0.000117986 | 0.331056411 |
| cg02400433 | PRDM13                                  | 1.96E-05    | 0.331055595 |
| cg25106913 |                                         | 2.58E-05    | 0.331042364 |
| cg05433490 |                                         | 0.000187194 | 0.331032946 |
| cg19694200 | TFAP2C                                  | 8.60E-06    | 0.331032027 |
| cg18090004 |                                         | 1.50E-05    | 0.33100351  |
| cg08616516 | GRM5                                    | 7.23E-05    | 0.33098524  |
| cg05842855 |                                         | 1.96E-05    | 0.330979503 |
| cg02102075 | RAB11FIP3                               | 0.000187194 | 0.330921718 |
| cg09844907 | MPV17L;MPV17L;MPV17L;MPV17L             | 0.000955793 | 0.330901511 |
| cg15724534 | C2orf67                                 | 4.34E-05    | 0.330899727 |
| cg00683156 | OGDHL;OGDHL;OGDHL                       | 3.34E-05    | 0.330894196 |
| cg18562243 | SOX2OT                                  | 0.000148457 | 0.330892085 |
| cg14780466 | GDF7                                    | 1.50E-05    | 0.330875861 |
| cg13481359 | EGR4                                    | 2.58E-05    | 0.330861949 |
| cg00500705 |                                         | 2.58E-05    | 0.330859039 |
| cg17874478 | SPATA6                                  | 0.001147425 | 0.330836744 |
| cg19021383 | MAPK8IP1                                | 7.23E-05    | 0.330832956 |
| cg10245879 | NPTX2                                   | 4.34E-05    | 0.330828022 |
| cg15448829 | SAMD12;SAMD12                           | 3.34E-05    | 0.330812656 |
| cg22539420 |                                         | 0.000233422 | 0.330804949 |
| cg07362168 | ISL1                                    | 0.000148457 | 0.330788048 |
| cg15063116 | CIDEA;CIDEA;CIDEA                       | 0.000148457 | 0.330778943 |
| cg05579030 | PCDHB5                                  | 0.000187194 | 0.330752139 |
| cg19877683 | B3GNTL1                                 | 9.24E-05    | 0.330738342 |
| cg03978579 | C10orf53;C10orf53                       | 1.11E-05    | 0.330731471 |
| cg19535607 | CHAT;CHAT;CHAT;CHAT;CHAT;CHAT;CHAT      | 1.11E-05    | 0.330729261 |
| cg20596493 |                                         | 0.000791389 | 0.330718407 |
| cg02444987 | RND3                                    | 4.34E-05    | 0.330716119 |
| cg20710709 | PAX9                                    | 0.000148457 | 0.33071377  |
| cg23049307 | DHCR24                                  | 3.34E-05    | 0.330706863 |
| cg06328855 | RBM20                                   | 0.009066563 | 0.330706009 |
| cg13893555 | FBXO10                                  | 8.60E-06    | 0.330701725 |
| cg10508760 |                                         | 4.34E-05    | 0.33070079  |
| cg06974592 |                                         | 0.000233422 | 0.330667796 |
| cg20229496 |                                         | 0.000148457 | 0.330666419 |
| cg05878558 | PVR;PVR;PVR;PVR;PVR;PVR;PVR;PVR         | 0.000148457 | 0.3306663   |
| cg04264638 | CLOCK                                   | 0.002304201 | 0.330663454 |
| cg12919006 | CNTNAP5                                 | 9.24E-05    | 0.330654141 |
| cg26830291 |                                         | 0.000148457 | 0.330645857 |
| cg14057383 | AFF3;AFF3                               | 7.23E-05    | 0.330634799 |
| cg02169487 |                                         | 5.59E-05    | 0.330626402 |
| cg19964641 | SEC14L4;SEC14L4                         | 1.11E-05    | 0.330618453 |
| cg26419728 |                                         | 3.34E-05    | 0.330618221 |
| cg23444468 | ERC2                                    | 2.58E-05    | 0.330608499 |
| cg18406033 | PAX3;PAX3;PAX3;PAX3;PAX3;PAX3;PAX3;PAX3 | 0.001147425 | 0.3306033   |
| cg27110994 | PDGFC;PDGFC                             | 9.24E-05    | 0.330597521 |
| cg19519310 | FOXF2                                   | 0.000233422 | 0.330585973 |
| cg06197377 | PCSK9                                   | 8.60E-06    | 0.330541651 |
| cg16592832 | C22orf45;C22orf45;UPB1                  | 0.000117986 | 0.330536898 |
| cg09248345 | LMX1A                                   | 0.000526175 | 0.33053446  |
| cg26436330 | COL11A1;COL11A1;COL11A1;COL11A1         | 0.000117986 | 0.330530814 |
| cg01009697 | NTRK2;NTRK2;NTRK2;NTRK2;NTRK2;NTRK2;    | 0.002714607 | 0.330528466 |
| cg06508320 | PEX5L                                   | 7.23E-05    | 0.330527912 |
| cg13059719 | FAM163A                                 | 4.34E-05    | 0.330527363 |
| cg23907053 | RAB3IP;RAB3IP;RAB3IP;RAB3IP;RAB3IP      | 0.005897668 | 0.33052689  |

|            |                                        |             |             |
|------------|----------------------------------------|-------------|-------------|
| cg02018902 | ANKRD34C                               | 5.59E-05    | 0.330491169 |
| cg04438558 | PCDHGA2;PCDHGA3;PCDHGA3;PCDHGA1        | 0.000357885 | 0.330489902 |
| cg16254962 | EGFLAM                                 | 0.000117986 | 0.330486792 |
| cg09561830 | UBAC2;MIR623;UBAC2;UBAC2               | 0.002714607 | 0.330484782 |
| cg09553242 |                                        | 4.34E-05    | 0.330479529 |
| cg18342279 | ZAR1                                   | 0.000654035 | 0.330461542 |
| cg13653144 | LMX1B                                  | 7.23E-05    | 0.330460109 |
| cg22485350 | DAB1                                   | 4.34E-05    | 0.330451676 |
| cg24924958 | NMBR                                   | 0.00043997  | 0.3304392   |
| cg02592727 | RDH13;RDH13;RDH13;RDH13                | 3.34E-05    | 0.330434547 |
| cg17460441 |                                        | 0.000570759 | 0.330415891 |
| cg15976763 | AQP4;AQP4                              | 1.50E-05    | 0.330412373 |
| cg03764518 |                                        | 0.000187194 | 0.33040617  |
| cg20145426 |                                        | 0.003189589 | 0.330391798 |
| cg24900370 | SAMD5                                  | 0.000117986 | 0.330368652 |
| cg25705486 | LOC100192426;PTPRM;PTPRM               | 0.000357885 | 0.330362352 |
| cg22082397 | DKK3;DKK3;DKK3;DKK3                    | 0.000233422 | 0.330345215 |
| cg14070647 | RSPO2                                  | 5.59E-05    | 0.330330344 |
| cg24286765 |                                        | 1.50E-05    | 0.330320096 |
| cg12991125 | PLA2R1;PLA2R1                          | 0.000654035 | 0.330319148 |
| cg21253130 | FRY                                    | 4.34E-05    | 0.330303062 |
| cg19210770 | ACCN4;ACCN4                            | 9.24E-05    | 0.330296249 |
| cg10575075 | ZNF438;ZNF438;ZNF438;ZNF438;ZNF438;ZNF | 0.000654035 | 0.33028685  |
| cg18081498 |                                        | 4.34E-05    | 0.330282626 |
| cg26239984 |                                        | 0.000233422 | 0.330282518 |
| cg23129170 | CCDC108;CCDC108                        | 3.34E-05    | 0.330259443 |
| cg25511332 |                                        | 1.11E-05    | 0.33024991  |
| cg08836481 | LARP4B                                 | 9.24E-05    | 0.330246063 |
| cg22478591 | GPM6A;GPM6A;GPM6A;GPM6A                | 0.000290372 | 0.330242678 |
| cg11284842 |                                        | 0.001147425 | 0.330237547 |
| cg25984400 |                                        | 0.00041966  | 0.330235683 |
| cg01850269 | SIM1                                   | 4.34E-05    | 0.330231933 |
| cg19401340 | PPM1E                                  | 1.96E-05    | 0.330230201 |
| cg00072720 | CLDN7                                  | 1.96E-05    | 0.330226244 |
| cg18247042 | SIX1                                   | 2.58E-05    | 0.330221211 |
| cg24079361 | SERP2;SERP2                            | 0.000233422 | 0.330218188 |
| cg16711612 | NRXN3;NRXN3;NRXN3                      | 9.24E-05    | 0.330214283 |
| cg04427852 | NMU                                    | 4.34E-05    | 0.330208294 |
| cg18031850 | SLC7A10                                | 0.000290372 | 0.330200237 |
| cg01591938 | APBA2;APBA2                            | 0.000187194 | 0.330200086 |
| cg02074956 | MGRN1;MGRN1;MGRN1;MGRN1                | 1.50E-05    | 0.330193769 |
| cg16394551 | PRDM16;PRDM16                          | 1.50E-05    | 0.330185135 |
| cg22958047 |                                        | 4.34E-05    | 0.330161387 |
| cg24235882 | CHIC2                                  | 0.000290372 | 0.330133948 |
| cg16766249 | NRXN3;NRXN3;NRXN3                      | 0.000233422 | 0.330125475 |
| cg25763393 | ZNF578;ZNF578                          | 0.002714607 | 0.330123872 |
| cg14533390 | MAGI1;MAGI1                            | 0.001948248 | 0.33011875  |
| cg03618113 |                                        | 4.34E-05    | 0.330114154 |
| cg25993718 | CBLN4                                  | 2.58E-05    | 0.33008049  |
| cg05578989 | CA8                                    | 0.001147425 | 0.330075425 |
| cg03816707 | KCNS1                                  | 0.000654035 | 0.330052809 |
| cg21995068 | LOC100134868                           | 4.34E-05    | 0.330042133 |
| cg01472538 | SETD6;SETD6                            | 0.002266401 | 0.3300393   |
| cg07425885 |                                        | 0.001639597 | 0.330037915 |
| cg04751631 |                                        | 0.000117986 | 0.329997924 |
| cg05240479 | MLPH;MLPH;MLPH;MLPH                    | 0.000117986 | 0.329990777 |
| cg25433267 | C10orf41;ZNF503                        | 0.000123078 | 0.329951698 |
| cg04113094 |                                        | 0.00043997  | 0.329944613 |
| cg13518327 | THRB;THRB;THRB                         | 0.000654035 | 0.329941527 |
| cg19416570 | ZNF274;ZNF274;ZNF274                   | 4.34E-05    | 0.329936401 |

|            |                                       |             |             |
|------------|---------------------------------------|-------------|-------------|
| cg03044239 | MRAS;MRAS;MRAS                        | 9.24E-05    | 0.32989254  |
| cg02057211 | OSBPL10                               | 0.000357885 | 0.329886039 |
| cg09169617 | LOC254559                             | 3.34E-05    | 0.329880797 |
| cg25382751 | TSPAN16;TSPAN16                       | 3.34E-05    | 0.329874301 |
| cg03048029 | SYNJ1;SYNJ1;SYNJ1;SYNJ1               | 0.000233422 | 0.329841447 |
| cg04507775 | NID1                                  | 0.000654035 | 0.329838204 |
| cg19003884 | PRDM13                                | 8.60E-06    | 0.329820969 |
| cg12425057 | MRPS25                                | 0.000233422 | 0.329817934 |
| cg15393937 | INS-IGF2;IGF2AS;IGF2;IGF2;IGF2AS;IGF2 | 0.000357885 | 0.329799511 |
| cg26814100 | MAP7                                  | 9.24E-05    | 0.329798909 |
| cg25074493 |                                       | 8.60E-06    | 0.329798255 |
| cg01815567 |                                       | 0.004357816 | 0.329797611 |
| cg15683970 | FAM165B                               | 1.96E-05    | 0.329792233 |
| cg14830601 | VAX1;VAX1                             | 4.34E-05    | 0.329789495 |
| cg16964389 |                                       | 0.0050758   | 0.329788056 |
| cg14956197 |                                       | 4.34E-05    | 0.329781035 |
| cg21348210 |                                       | 7.23E-05    | 0.329778805 |
| cg04044720 |                                       | 7.23E-05    | 0.329746438 |
| cg17525406 | AJAP1;AJAP1                           | 0.000357885 | 0.329746307 |
| cg13423075 | LHCGR                                 | 0.000233422 | 0.329719281 |
| cg18428265 | NPAS2                                 | 0.000117986 | 0.32970915  |
| cg18025136 | C1orf159                              | 0.000357885 | 0.329707082 |
| cg13744194 | OCLN                                  | 0.000148457 | 0.329674783 |
| cg27511599 |                                       | 0.000233422 | 0.329673459 |
| cg23326228 | CLVS1                                 | 0.000205664 | 0.329668882 |
| cg26976732 | HBM                                   | 0.000290372 | 0.329656805 |
| cg18461021 | GALR1                                 | 0.000148457 | 0.329653871 |
| cg07394719 | C10orf90                              | 0.000357885 | 0.329653417 |
| cg14101494 |                                       | 0.000955793 | 0.329628819 |
| cg18538340 | TMEM108;TMEM108                       | 0.000233422 | 0.329624906 |
| cg23093589 | SP8;SP8                               | 0.000187194 | 0.329599876 |
| cg23092040 |                                       | 8.60E-06    | 0.329593365 |
| cg09074113 | GDF7                                  | 1.11E-05    | 0.329592463 |
| cg21484213 | LRP1B;LRP1B                           | 0.000187194 | 0.329583708 |
| cg03912954 | CACNA1B                               | 1.11E-05    | 0.329575843 |
| cg13633497 | MADCAM1;MADCAM1                       | 0.000654035 | 0.329573513 |
| cg24916013 | WTIP                                  | 9.24E-05    | 0.329567224 |
| cg13482485 | SNX7;SNX7                             | 7.23E-05    | 0.329567072 |
| cg14145801 | ZSWIM2                                | 0.00043997  | 0.329559846 |
| cg07572341 | FOXA2;FOXA2                           | 1.11E-05    | 0.329559542 |
| cg12157673 | ZNF578                                | 8.60E-06    | 0.329554368 |
| cg26588061 | UPF2;UPF2                             | 0.001147425 | 0.32955423  |
| cg09446136 | KITLG;KITLG                           | 8.60E-06    | 0.329551733 |
| cg12221475 | FOXF2                                 | 3.34E-05    | 0.3295506   |
| cg01454215 | UCN                                   | 0.000955793 | 0.329550219 |
| cg26112871 | FBXW11;FBXW11;FBXW11                  | 9.24E-05    | 0.329537251 |
| cg07943461 |                                       | 1.50E-05    | 0.329529359 |
| cg27440715 | LMX1A                                 | 3.34E-05    | 0.329526885 |
| cg22747076 | HOXC4;HOXC4                           | 0.001376172 | 0.329523661 |
| cg21700663 |                                       | 1.96E-05    | 0.329518605 |
| cg18416950 | HOXB2                                 | 9.24E-05    | 0.32950045  |
| cg00009292 |                                       | 7.23E-05    | 0.329493076 |
| cg08879910 | HLA-J;NCRNA00171                      | 0.000654035 | 0.329490405 |
| cg04373334 | FAT4                                  | 0.000117986 | 0.329488949 |
| cg16419441 | DPYS                                  | 0.0050758   | 0.32948232  |
| cg16061012 | ARL4A;ARL4A;ARL4A                     | 0.005897668 | 0.329479475 |
| cg07247419 | NKX2-4                                | 9.24E-05    | 0.329475291 |
| cg06382526 |                                       | 0.000148457 | 0.329474832 |
| cg07552803 | NEFM;NEFM                             | 0.000290372 | 0.329469563 |
| cg22604636 | ATOH1                                 | 1.50E-05    | 0.329468907 |

|            |                                     |             |             |
|------------|-------------------------------------|-------------|-------------|
| cg17464383 | PRDM6                               | 0.001639597 | 0.329468415 |
| cg07503059 | EPB41L4A;FLJ11235                   | 0.001639597 | 0.329449499 |
| cg02710296 | C1orf14                             | 0.004357816 | 0.329449053 |
| cg05347845 | ACTA1                               | 0.000955793 | 0.329443175 |
| cg16241421 | CUX2                                | 0.000357885 | 0.329439947 |
| cg09508016 |                                     | 3.34E-05    | 0.329438009 |
| cg00838898 |                                     | 0.000233422 | 0.329434683 |
| cg03549146 | MIR140;WWP2;WWP2                    | 0.000117986 | 0.329429194 |
| cg19181162 |                                     | 1.11E-05    | 0.329412895 |
| cg17147045 | PREX2;PREX2                         | 0.000537905 | 0.329412512 |
| cg18833573 |                                     | 0.000117986 | 0.329399647 |
| cg09096555 | GRIN2C                              | 8.60E-06    | 0.329399247 |
| cg13305823 | MAS1L                               | 0.000357885 | 0.329384098 |
| cg12007399 | ZFR2;ZFR2;ZFR2                      | 1.50E-05    | 0.329368318 |
| cg10445453 | ADAMTS14;ADAMTS14                   | 0.002714607 | 0.329366337 |
| cg26561681 | EIF4G3                              | 0.0050758   | 0.329335226 |
| cg03600259 |                                     | 1.96E-05    | 0.32933016  |
| cg01877450 | BRI3;BRI3                           | 0.000187194 | 0.329319848 |
| cg17541528 | COL4A1;COL4A2;COL4A2                | 0.007873393 | 0.3293071   |
| cg22538959 |                                     | 8.60E-06    | 0.329297578 |
| cg17605235 | ANKRD18A;C9orf122                   | 2.58E-05    | 0.329273645 |
| cg13933734 |                                     | 0.000187194 | 0.329272797 |
| cg17650274 | VSX1;VSX1                           | 8.60E-06    | 0.32926828  |
| cg04557057 |                                     | 7.23E-05    | 0.329260991 |
| cg03149699 | PRICKLE1                            | 0.001376172 | 0.329209648 |
| cg05328197 | MAPK4                               | 0.000233422 | 0.329201404 |
| cg23757446 | ONECUT2                             | 9.24E-05    | 0.329189385 |
| cg23381749 |                                     | 3.34E-05    | 0.329169421 |
| cg25556204 | UGGT2                               | 0.000233422 | 0.329160163 |
| cg03340398 | SLC7A2                              | 7.23E-05    | 0.329154459 |
| cg24071726 | LOC440925;SP5                       | 0.000290372 | 0.329151093 |
| cg08912317 | SCIN                                | 0.002714607 | 0.329137175 |
| cg01087254 |                                     | 0.005897668 | 0.329114927 |
| cg08938906 | RFX4                                | 1.11E-05    | 0.329105103 |
| cg07167168 | PTPRT;PTPRT                         | 0.00043997  | 0.329104587 |
| cg05143887 | ACSS3                               | 0.000187194 | 0.329096906 |
| cg17517865 | KCND3;KCND3                         | 0.001948248 | 0.329090459 |
| cg26316946 | GRIK2;GRIK2;GRIK2;GRIK2;GRIK2;GRIK2 | 1.50E-05    | 0.329089961 |
| cg18900649 | PRDM13                              | 2.58E-05    | 0.329079406 |
| cg11199869 | FMO1                                | 0.000791389 | 0.329078642 |
| cg13762060 | DMRT1                               | 9.24E-05    | 0.329054369 |
| cg22977892 |                                     | 0.000791389 | 0.329048008 |
| cg05437823 | TFAP2B                              | 0.000187194 | 0.329039974 |
| cg00501765 | C1orf105                            | 3.34E-05    | 0.329039111 |
| cg21068911 | ELMOD1;LOC643923;ELMOD1             | 0.000791389 | 0.329032628 |
| cg21092808 | HOXD3                               | 5.59E-05    | 0.329030319 |
| cg26095658 | FIGLA                               | 2.80E-05    | 0.329024198 |
| cg23097006 | VSX1;VSX1                           | 9.24E-05    | 0.329004015 |
| cg01832892 | ANO3                                | 9.24E-05    | 0.328998831 |
| cg26248173 |                                     | 0.002714607 | 0.328998573 |
| cg03629151 | SDR42E1                             | 1.11E-05    | 0.328993822 |
| cg21570988 | PRRT1                               | 4.34E-05    | 0.328987854 |
| cg08160091 |                                     | 8.60E-06    | 0.328986145 |
| cg26620655 | C7orf50;C7orf50;C7orf50             | 4.34E-05    | 0.328985462 |
| cg15219811 | ACTR1A                              | 0.001376172 | 0.328982008 |
| cg11006995 | EBF2                                | 4.34E-05    | 0.328978199 |
| cg04415176 | HOXD13                              | 0.000955793 | 0.328972968 |
| cg00488091 |                                     | 1.96E-05    | 0.328962015 |
| cg01853561 | SIM2                                | 0.000148457 | 0.328959694 |
| cg20080624 | DLX5                                | 0.000117986 | 0.328942991 |

|            |                                         |             |             |
|------------|-----------------------------------------|-------------|-------------|
| cg01268901 | WNT5B;WNT5B                             | 4.34E-05    | 0.32893924  |
| cg02699332 | ARHGEF4;ARHGEF4                         | 9.24E-05    | 0.328928572 |
| cg10280347 | PPAPDC1A                                | 8.60E-06    | 0.328907235 |
| cg26220673 |                                         | 0.000537905 | 0.328885908 |
| cg20771178 | STK33                                   | 9.24E-05    | 0.328871492 |
| cg15997429 | DACT2                                   | 7.23E-05    | 0.328870403 |
| cg27213509 | EVX2                                    | 8.60E-06    | 0.32886131  |
| cg22396959 | PPAP2B;PPAP2B                           | 0.000233422 | 0.328855512 |
| cg26228266 | DLGAP3                                  | 0.002266401 | 0.328854092 |
| cg11325267 |                                         | 8.60E-06    | 0.328834123 |
| cg13057857 |                                         | 4.34E-05    | 0.328833412 |
| cg05229355 | ADCY8;ADCY8                             | 1.11E-05    | 0.32882596  |
| cg19134568 | POU4F2                                  | 1.50E-05    | 0.328803914 |
| cg08478447 | CACNA1D;CACNA1D;CACNA1D                 | 0.000357885 | 0.328784341 |
| cg19698403 |                                         | 1.11E-05    | 0.328775137 |
| cg21653826 | EFHA2                                   | 2.58E-05    | 0.328774146 |
| cg02431597 | CACNA1E                                 | 0.000117986 | 0.328772687 |
| cg15609237 | TTN;TTN;TTN;MIR548N;TTN                 | 2.58E-05    | 0.328748682 |
| cg07204353 | OSBP2                                   | 0.000955793 | 0.328727265 |
| cg15713630 | LMX1A                                   | 1.50E-05    | 0.328721876 |
| cg22614142 | KIFC2                                   | 0.001639597 | 0.328718693 |
| cg20464368 | HEATR1                                  | 4.34E-05    | 0.328709677 |
| cg03546806 | RBM19;RBM19;RBM19                       | 8.60E-06    | 0.328700227 |
| cg18049167 | PPT2;PPT2                               | 0.007873393 | 0.328691266 |
| cg05855039 | FLRT2;FLRT2                             | 5.59E-05    | 0.328662247 |
| cg17538572 | CYP26A1;CYP26A1                         | 0.000357885 | 0.328645915 |
| cg10287137 | P2RY2;P2RY2;P2RY2                       | 3.34E-05    | 0.328624144 |
| cg14556683 | EPHX3;EPHX3                             | 0.000290372 | 0.328619409 |
| cg24457126 | CYP39A1;SLC25A27                        | 0.000187194 | 0.328604427 |
| cg17627617 | PAQR9                                   | 0.001376172 | 0.328600539 |
| cg01468309 | PARVA                                   | 1.96E-05    | 0.328597195 |
| cg03769383 | PDZRN4                                  | 0.000537905 | 0.328596446 |
| cg24497186 |                                         | 0.000187194 | 0.328594654 |
| cg14775114 | TFPI2;TFPI2                             | 0.000290372 | 0.32857963  |
| cg07040303 |                                         | 8.60E-06    | 0.328567872 |
| cg07057636 | CYP1B1                                  | 0.000290372 | 0.328562319 |
| cg23418645 | GPHN;GPHN                               | 0.000148457 | 0.328555077 |
| cg22827063 |                                         | 2.58E-05    | 0.328535778 |
| cg25717239 | HECW1                                   | 0.001147425 | 0.328518937 |
| cg07850418 | ZIC4;ZIC4;ZIC4;ZIC4;ZIC4                | 9.24E-05    | 0.328516822 |
| cg26686361 |                                         | 9.24E-05    | 0.328513597 |
| cg20510724 | ACAN;ACAN;ACAN;ACAN                     | 7.23E-05    | 0.328510004 |
| cg16519192 |                                         | 5.59E-05    | 0.328507797 |
| cg10146203 | GABRA5;GABRA5                           | 0.000187194 | 0.328493597 |
| cg03693911 | PPP2R2B;PPP2R2B;PPP2R2B;PPP2R2B;PPP2R2B | 5.59E-05    | 0.328488951 |
| cg24717325 |                                         | 2.58E-05    | 0.328484899 |
| cg26384430 | NPY2R                                   | 1.50E-05    | 0.328475963 |
| cg24581326 | TFAP2C                                  | 2.58E-05    | 0.328469893 |
| cg00660105 |                                         | 1.11E-05    | 0.328456821 |
| cg14844194 |                                         | 0.000187194 | 0.328453019 |
| cg04180462 | ACAT1                                   | 5.59E-05    | 0.328445874 |
| cg11881313 | LHFPL3                                  | 1.96E-05    | 0.328443758 |
| cg24451800 | PTPRM;PTPRM                             | 0.000357885 | 0.32844086  |
| cg18032891 | C8orf48;C8orf48                         | 7.23E-05    | 0.328438827 |
| cg08614481 | HTR1B                                   | 8.60E-06    | 0.328432673 |
| cg20871586 |                                         | 0.000122184 | 0.328408881 |
| cg12406559 | ZNF532;ZNF532                           | 3.34E-05    | 0.328402622 |
| cg24435401 | NPAS4                                   | 7.23E-05    | 0.328397721 |
| cg18583378 | ATG9B                                   | 0.000290372 | 0.328393662 |
| cg11002686 |                                         | 2.58E-05    | 0.32838777  |

|            |                                            |             |             |
|------------|--------------------------------------------|-------------|-------------|
| cg15579817 | VAX2                                       | 0.002714607 | 0.328380032 |
| cg25161129 | WIP11                                      | 0.004357816 | 0.328371861 |
| cg07769790 | CPEB1                                      | 1.50E-05    | 0.328354345 |
| cg07739113 |                                            | 0.00043997  | 0.328353951 |
| cg25313204 | SLC22A3                                    | 9.24E-05    | 0.328347344 |
| cg07690768 | BICD1;BICD1                                | 1.96E-05    | 0.32834381  |
| cg22993195 | AMIGO3;RNF123                              | 1.96E-05    | 0.328335975 |
| cg05694021 |                                            | 0.0050758   | 0.328331133 |
| cg19416417 | SGPP2                                      | 3.34E-05    | 0.328321945 |
| cg08152546 |                                            | 0.000233422 | 0.328298255 |
| cg09188868 | PIP4K2C;PIP4K2C;PIP4K2C;PIP4K2C            | 1.50E-05    | 0.328289971 |
| cg04159901 |                                            | 0.001147425 | 0.328279614 |
| cg02631462 | LYPD5                                      | 5.59E-05    | 0.328273238 |
| cg22717109 | REEP1;REEP1;REEP1;REEP1                    | 4.34E-05    | 0.328271017 |
| cg20272619 | DAB1                                       | 1.96E-05    | 0.328236762 |
| cg05834899 | SART3;ISCU;ISCU                            | 3.34E-05    | 0.328236048 |
| cg18788741 | FAM150A                                    | 0.002304201 | 0.328225362 |
| cg16461251 | TACR3;TACR3                                | 3.34E-05    | 0.328215285 |
| cg07356745 | FAM190B                                    | 0.001147425 | 0.328208388 |
| cg19730972 |                                            | 0.000357885 | 0.32820338  |
| cg22058990 |                                            | 4.34E-05    | 0.328183732 |
| cg01329687 | SNN                                        | 0.000357885 | 0.328170006 |
| cg23739994 | GPR83                                      | 7.23E-05    | 0.328161238 |
| cg19267325 | NELL2;NELL2;NELL2;NELL2;NELL2;NELL2;NE     | 0.009066563 | 0.328158804 |
| cg15948567 | AKR7L;AKR7L                                | 0.000148457 | 0.328148901 |
| cg22539069 | ONECUT1                                    | 4.34E-05    | 0.328147845 |
| cg24634422 | SLC1A2                                     | 0.000187194 | 0.328140061 |
| cg04936009 |                                            | 0.000117986 | 0.328132339 |
| cg10543574 |                                            | 0.000117986 | 0.328128406 |
| cg22179082 | GPR12                                      | 0.000290372 | 0.328118665 |
| cg23978504 | SOX2OT                                     | 0.000148457 | 0.328112246 |
| cg17172851 | PAX7;PAX7;PAX7                             | 0.006823935 | 0.328097053 |
| cg04899492 | NRSN1                                      | 5.59E-05    | 0.328077951 |
| cg17093795 | GRP;GRP;GRP;GRP;GRP;GRP                    | 9.24E-05    | 0.328077426 |
| cg01101663 | PCDHB16                                    | 8.60E-06    | 0.32807319  |
| cg04418492 | CYP7B1;CYP7B1                              | 0.000117986 | 0.328068792 |
| cg06738040 |                                            | 0.00043997  | 0.328063824 |
| cg19516404 | ZIC4;ZIC4;ZIC4                             | 2.58E-05    | 0.328052724 |
| cg20012308 |                                            | 0.000233422 | 0.328047592 |
| cg19567689 |                                            | 3.34E-05    | 0.328046549 |
| cg05846716 | PCSK2                                      | 1.50E-05    | 0.328041258 |
| cg11111225 | DPYSL5                                     | 4.34E-05    | 0.328040143 |
| cg13319711 |                                            | 5.59E-05    | 0.328034537 |
| cg07800320 | ALDH1L1                                    | 9.24E-05    | 0.328034057 |
| cg01486146 |                                            | 9.04E-05    | 0.328029281 |
| cg11654011 | CEACAM8                                    | 0.000148457 | 0.328019922 |
| cg23593167 | MOSC2;MOSC2                                | 0.001639597 | 0.328011475 |
| cg11445094 |                                            | 0.00746304  | 0.328006188 |
| cg17833476 | TLX3                                       | 1.50E-05    | 0.327997668 |
| cg07586272 | GPR83;GPR83                                | 0.001639597 | 0.327981022 |
| cg17953577 | DNAH9                                      | 8.60E-06    | 0.327974625 |
| cg14124894 | VASH1                                      | 3.34E-05    | 0.327972551 |
| cg10022526 | BDNF                                       | 7.23E-05    | 0.327928474 |
| cg24410535 | FAT1                                       | 0.003734675 | 0.327910725 |
| cg13929566 | SYNE1;SYNE1                                | 3.34E-05    | 0.327909726 |
| cg12805420 | CLDN7                                      | 1.11E-05    | 0.327901886 |
| cg00412772 | YIF1B;YIF1B;C19orf33;YIF1B;YIF1B;YIF1B;YIF | 0.000148457 | 0.327894692 |
| cg24419324 |                                            | 0.000537905 | 0.32788491  |
| cg18279004 |                                            | 0.00043997  | 0.327882227 |
| cg17353412 | HOXA2                                      | 9.24E-05    | 0.327862408 |



|            |                                         |             |             |
|------------|-----------------------------------------|-------------|-------------|
| cg12487655 |                                         | 0.000187194 | 0.327842678 |
| cg12925682 | OSMR;OSMR                               | 5.59E-05    | 0.327819841 |
| cg14189391 | DNMT3A;DNMT3A;DNMT3A                    | 0.000654035 | 0.32779946  |
| cg21880476 |                                         | 0.000955793 | 0.327796084 |
| cg18848688 | LIFR;LIFR                               | 0.000537905 | 0.327784637 |
| cg04962621 | MGRN1;MGRN1;MGRN1;MGRN1                 | 0.000791389 | 0.327777197 |
| cg00758915 | PCDHGA4;PCDHGA6;PCDHGA1;PCDHGA5;PCDHGA5 | 0.000537905 | 0.32777599  |
| cg27166577 | ELOVL4                                  | 1.50E-05    | 0.327774108 |
| cg20533957 | FUT4                                    | 0.000148457 | 0.327766151 |
| cg19532307 | SLITRK3                                 | 0.000117986 | 0.327757557 |
| cg11702896 |                                         | 0.000187194 | 0.327754287 |
| cg08874747 | FAT1                                    | 0.003189589 | 0.327734686 |
| cg17854471 | GABRD                                   | 1.50E-05    | 0.327730752 |
| cg06235653 | DNASE1L2                                | 3.34E-05    | 0.327721137 |
| cg10679266 | DEFA4                                   | 1.96E-05    | 0.327710283 |
| cg13892954 | PRKAA2                                  | 0.000654035 | 0.327704281 |
| cg19453991 |                                         | 5.59E-05    | 0.327702237 |
| cg03529189 | SRGAP1                                  | 0.000290372 | 0.327665005 |
| cg20622089 | CNR1;CNR1;CNR1;CNR1                     | 0.002714607 | 0.327629574 |
| cg01106338 |                                         | 1.11E-05    | 0.327626576 |
| cg14274989 | EN1                                     | 7.23E-05    | 0.327612386 |
| cg16151538 | TRPC4AP;TRPC4AP                         | 2.58E-05    | 0.327612255 |
| cg01601658 |                                         | 7.23E-05    | 0.327612014 |
| cg15388804 |                                         | 0.000187194 | 0.327604545 |
| cg15748490 | FMN2                                    | 4.34E-05    | 0.327591961 |
| cg04352304 |                                         | 0.000955793 | 0.327582732 |
| cg19812826 | FGF14                                   | 5.59E-05    | 0.327557114 |
| cg22071224 | LOC440925;SP5                           | 5.59E-05    | 0.327540658 |
| cg07808348 | GREM2                                   | 0.001147425 | 0.327534171 |
| cg00261569 | C3orf1                                  | 0.000654035 | 0.32752685  |
| cg21297704 | MTUS2;MTUS2                             | 0.00043997  | 0.327526085 |
| cg08661007 | ROBO1                                   | 0.000187194 | 0.327525139 |
| cg09896900 | ZNF229                                  | 0.001147425 | 0.32752332  |
| cg05271255 |                                         | 0.000187194 | 0.327519395 |
| cg26501369 | EYA4;EYA4;EYA4                          | 5.59E-05    | 0.327503942 |
| cg17795240 | GATA4                                   | 0.001479724 | 0.327495567 |
| cg25260683 | GRP;GRP;GRP                             | 1.50E-05    | 0.327494357 |
| cg02272576 | LOC100132354                            | 5.59E-05    | 0.327493587 |
| cg10039299 |                                         | 1.50E-05    | 0.32747669  |
| cg15175129 | MSRB3;MSRB3                             | 0.001948248 | 0.327471793 |
| cg04836851 | PCDHB16                                 | 0.000117986 | 0.327471521 |
| cg10576257 | TACR1;TACR1                             | 0.000537905 | 0.327464165 |
| cg14619064 | MPO                                     | 4.34E-05    | 0.327461979 |
| cg04272632 | CSMD2                                   | 9.24E-05    | 0.32746094  |
| cg23208176 |                                         | 1.11E-05    | 0.327460696 |
| cg08173915 | IFNGR2                                  | 0.000955793 | 0.327454428 |
| cg09924064 | ACCN1;ACCN1                             | 0.0050758   | 0.327449616 |
| cg24452591 |                                         | 1.11E-05    | 0.327447333 |
| cg03319479 |                                         | 2.58E-05    | 0.327441263 |
| cg25444002 | FGF14;FGF14                             | 4.34E-05    | 0.327439136 |
| cg16697438 |                                         | 0.001147425 | 0.327436716 |
| cg18506678 |                                         | 0.000148457 | 0.327424744 |
| cg06943420 | MMP23A;MMP23B                           | 0.000290372 | 0.327412181 |
| cg07317551 | HPCAL4                                  | 9.24E-05    | 0.327378305 |
| cg08677617 |                                         | 0.000187194 | 0.327365877 |
| cg14004073 | FAM159B                                 | 0.000654035 | 0.327351002 |
| cg16735881 | NBEA                                    | 2.58E-05    | 0.327341277 |
| cg01526217 |                                         | 0.0050758   | 0.327311534 |
| cg08823027 | KCNE1;KCNE1;KCNE1                       | 0.000791389 | 0.327299549 |
| cg12516270 | LYNX1;LYNX1;LYNX1;LYNX1;LYNX1;LYNX1     | 0.001376172 | 0.327295415 |

|            |                                    |             |             |
|------------|------------------------------------|-------------|-------------|
| cg17183770 | SKIL;SKIL;SKIL                     | 0.000955793 | 0.327293104 |
| cg18961944 | GALR1                              | 7.38E-05    | 0.327293045 |
| cg03576469 | CCDC8                              | 0.000187194 | 0.327267058 |
| cg15356923 | FAM19A4;FAM19A4                    | 3.34E-05    | 0.327266981 |
| cg08999915 |                                    | 9.24E-05    | 0.327261828 |
| cg14868703 | LHX5                               | 0.000187194 | 0.327237661 |
| cg01197871 |                                    | 7.23E-05    | 0.327228078 |
| cg13964068 |                                    | 7.23E-05    | 0.327216261 |
| cg12044685 | CYP26B1                            | 0.000148457 | 0.327215646 |
| cg17722002 |                                    | 9.24E-05    | 0.327213041 |
| cg27125044 |                                    | 9.24E-05    | 0.327193378 |
| cg23985374 | PCDHA6;PCDHA2;PCDHA1;PCDHA9;PCDHA7 | 1.50E-05    | 0.327187906 |
| cg10012059 | STAP2;STAP2                        | 0.000791389 | 0.327180844 |
| cg14611683 | EIF2B3;EIF2B3                      | 2.58E-05    | 0.327177093 |
| cg21226442 | C12orf11                           | 1.50E-05    | 0.327171084 |
| cg02051616 | NKX2-5;NKX2-5;NKX2-5               | 5.59E-05    | 0.327157423 |
| cg05928849 | ASAM                               | 0.000791389 | 0.327143662 |
| cg17430979 | JAKMIP1                            | 1.96E-05    | 0.327143211 |
| cg25010752 |                                    | 9.24E-05    | 0.327135375 |
| cg13891181 |                                    | 3.21E-05    | 0.327105814 |
| cg16646616 |                                    | 0.000290372 | 0.327099197 |
| cg14620572 | GPR144                             | 8.60E-06    | 0.327085177 |
| cg11838299 | NLRP14;ZNF214;NLRP14               | 2.58E-05    | 0.327073075 |
| cg16736896 |                                    | 0.000187194 | 0.327046589 |
| cg25905812 | DMRT1                              | 1.96E-05    | 0.327031268 |
| cg14934413 |                                    | 5.59E-05    | 0.327029686 |
| cg08830758 | REERG;REERG                        | 0.000187194 | 0.327016756 |
| cg13882309 | PCDHB13                            | 8.60E-06    | 0.327007338 |
| cg16509658 | GABRB2;GABRB2                      | 0.000334462 | 0.326995807 |
| cg02579377 |                                    | 0.000654035 | 0.326992143 |
| cg05855588 | KL                                 | 0.002304201 | 0.326991601 |
| cg15229275 | HIF3A                              | 0.001376172 | 0.326985667 |
| cg11252792 |                                    | 5.59E-05    | 0.326981044 |
| cg03199745 | FLJ12825                           | 4.34E-05    | 0.326962509 |
| cg07139284 |                                    | 0.000187194 | 0.326957949 |
| cg26275470 |                                    | 2.58E-05    | 0.326942925 |
| cg23414595 | ZMAT5;ZMAT5                        | 3.34E-05    | 0.326940848 |
| cg20242210 | PKIB;PKIB;PKIB                     | 0.000233422 | 0.326927715 |
| cg06198892 |                                    | 5.59E-05    | 0.326924712 |
| cg07599881 |                                    | 9.24E-05    | 0.32692031  |
| cg08064488 |                                    | 0.000148457 | 0.326913922 |
| cg01229658 |                                    | 0.000357885 | 0.326902278 |
| cg15644413 | C1orf216                           | 2.58E-05    | 0.326890718 |
| cg22869030 |                                    | 0.000148457 | 0.326888775 |
| cg02707307 |                                    | 0.000233422 | 0.326888194 |
| cg24127719 |                                    | 0.000148457 | 0.326878106 |
| cg26226802 | GLRA3;GLRA3                        | 0.000233422 | 0.326877696 |
| cg27138281 | ME1                                | 0.000365373 | 0.326860141 |
| cg16658618 | MYBPC1;MYBPC1;MYBPC1;MYBPC1        | 4.34E-05    | 0.326860101 |
| cg14497054 |                                    | 8.60E-06    | 0.326857052 |
| cg11399409 | GBA;GBA;GBA;GBA;GBA                | 0.000148457 | 0.32685248  |
| cg21928095 |                                    | 0.001376172 | 0.326841151 |
| cg17811778 | NKX2-3                             | 1.50E-05    | 0.326818618 |
| cg16601569 | ZNF528                             | 9.24E-05    | 0.326815084 |
| cg20060685 | NUAK1                              | 0.000187194 | 0.32681071  |
| cg14770293 |                                    | 0.001948248 | 0.326809616 |
| cg19439399 | ELOVL4                             | 1.50E-05    | 0.326792994 |
| cg18107232 |                                    | 0.000357885 | 0.326790457 |
| cg10030921 | MORN4;MORN4                        | 3.34E-05    | 0.326786409 |
| cg07203423 | TLX2                               | 0.000955793 | 0.326772792 |

|            |                                    |             |             |
|------------|------------------------------------|-------------|-------------|
| cg20479774 | DLX6AS;DLX6                        | 0.0050758   | 0.326714534 |
| cg09558547 |                                    | 0.000290372 | 0.326704463 |
| cg27274542 | NPEPL1                             | 0.00043997  | 0.326704317 |
| cg15717183 | SOX2OT                             | 8.60E-06    | 0.326700984 |
| cg20061010 |                                    | 0.000117986 | 0.326690219 |
| cg07388347 |                                    | 0.005897668 | 0.326674192 |
| cg11599680 |                                    | 5.59E-05    | 0.326672704 |
| cg07696699 | FAM184B                            | 0.003189589 | 0.32666709  |
| cg09342940 |                                    | 3.34E-05    | 0.326662284 |
| cg21599215 | LOC150786                          | 3.34E-05    | 0.326658147 |
| cg20927119 | ACTR3C;ACTR3C;ACTR3C               | 0.001376172 | 0.32665552  |
| cg20942162 |                                    | 4.34E-05    | 0.326645287 |
| cg09014354 | NEUROD4;NEUROD4                    | 5.59E-05    | 0.326644506 |
| cg27615578 | LRR8E                              | 7.23E-05    | 0.326643916 |
| cg24882324 | TNXB                               | 0.000654035 | 0.326635432 |
| cg12348588 | BTBD17                             | 0.000654035 | 0.326605391 |
| cg24076884 | PCDHAC2;PCDHA7;PCDHA12;PCDHA6;PCDH | 4.34E-05    | 0.326594548 |
| cg07248310 | HOOK1;HOOK1                        | 1.96E-05    | 0.326589761 |
| cg19795292 | IL1RL1;IL1RL1                      | 2.58E-05    | 0.32658683  |
| cg24848035 | RGS22                              | 0.000290372 | 0.326583011 |
| cg07590961 | DPP6;DPP6;DPP6                     | 8.60E-06    | 0.326580556 |
| cg07007400 | KRT7                               | 4.34E-05    | 0.326568514 |
| cg23547017 | HOXD3                              | 9.24E-05    | 0.326568293 |
| cg24098603 | C10orf79                           | 0.007869847 | 0.326561621 |
| cg08675869 | NR2F2;NR2F2;NR2F2;NR2F2;NR2F2      | 0.00043997  | 0.326557397 |
| cg10208610 | TRNP1                              | 0.000187194 | 0.326555107 |
| cg06286962 | FAT1                               | 0.000233422 | 0.326544549 |
| cg15511381 |                                    | 2.58E-05    | 0.326532321 |
| cg09415754 |                                    | 8.60E-06    | 0.326531655 |
| cg21234265 |                                    | 0.000148457 | 0.326527764 |
| cg06562865 | GALR1                              | 0.000537905 | 0.326518674 |
| cg15972331 | FGF14;FGF14                        | 0.000148457 | 0.32651403  |
| cg02767771 | UTF1                               | 0.001147425 | 0.32650707  |
| cg09086835 | LOC254559                          | 3.34E-05    | 0.326507032 |
| cg01070355 | NRSN1                              | 7.23E-05    | 0.326506337 |
| cg21121136 |                                    | 0.001147425 | 0.3265027   |
| cg27009703 | HOXA9                              | 0.003189589 | 0.326500117 |
| cg09476130 | CCDC19                             | 4.34E-05    | 0.326497955 |
| cg19613432 | EN1                                | 3.34E-05    | 0.326497754 |
| cg00567749 | VCAN;VCAN;VCAN;VCAN                | 0.003734675 | 0.326491955 |
| cg20907614 |                                    | 0.000148457 | 0.326483651 |
| cg12503575 | OGDHL;OGDHL;OGDHL                  | 5.59E-05    | 0.326482199 |
| cg10133935 | DAZAP1;DAZAP1                      | 2.58E-05    | 0.326478379 |
| cg20309121 |                                    | 0.001376172 | 0.326476911 |
| cg26147845 | EP400                              | 0.006823935 | 0.326473153 |
| cg23024158 | C10orf11                           | 0.000148457 | 0.326445743 |
| cg04424443 | DST;DST;DST;DST;DST                | 0.001376172 | 0.326423967 |
| cg14291663 |                                    | 0.000357885 | 0.326407165 |
| cg25221235 |                                    | 4.34E-05    | 0.326406364 |
| cg05967001 | RPH3A;RPH3A;RPH3A;RPH3A            | 4.34E-05    | 0.326346998 |
| cg27283345 | TFAP2A;TFAP2A                      | 2.58E-05    | 0.326343135 |
| cg14283758 |                                    | 0.000537905 | 0.326338496 |
| cg26972272 | OTX2OS1                            | 4.34E-05    | 0.3263378   |
| cg22963554 | KIAA1024                           | 7.23E-05    | 0.326324642 |
| cg24996161 | PCDHGA2;PCDHGA4;PCDHGA1;PCDHGB1;PC | 1.50E-05    | 0.326316246 |
| cg16395183 | HHAT;HHAT;HHAT;HHAT;HHAT;HHAT      | 0.000117986 | 0.326306557 |
| cg24174665 | XKR4                               | 0.000187194 | 0.326306492 |
| cg20633875 | KPNA6                              | 0.000537905 | 0.326287077 |
| cg10523903 |                                    | 1.50E-05    | 0.326280349 |
| cg12664940 | PCDHB1                             | 0.002450672 | 0.32626734  |

|            |                                     |             |             |
|------------|-------------------------------------|-------------|-------------|
| cg07916589 |                                     | 8.60E-06    | 0.326250441 |
| cg09797577 |                                     | 0.00043997  | 0.326237372 |
| cg07762181 |                                     | 0.000148457 | 0.326227276 |
| cg08864344 |                                     | 0.000187194 | 0.326215364 |
| cg03805492 |                                     | 2.58E-05    | 0.326201729 |
| cg04565261 |                                     | 0.003189589 | 0.326191576 |
| cg18537001 | EPHA10;EPHA10                       | 0.000148457 | 0.326174878 |
| cg14042396 |                                     | 1.11E-05    | 0.326158005 |
| cg00472814 | ADAMTS1;ADAMTS1                     | 0.000187194 | 0.326155008 |
| cg02805920 | FLRT2                               | 1.96E-05    | 0.326154447 |
| cg12973591 | TFPI2                               | 0.00043997  | 0.326152309 |
| cg20910807 | EDN3;EDN3;EDN3;EDN3                 | 0.000955793 | 0.326151136 |
| cg12471986 | ZNF214;NLRP14;ZNF214                | 1.50E-05    | 0.326148437 |
| cg19524362 | CALCR;CALCR                         | 0.000290372 | 0.32614026  |
| cg20634738 | ANO5;ANO5                           | 4.34E-05    | 0.326138081 |
| cg13426307 | KIF12                               | 0.000290372 | 0.326119718 |
| cg06086731 |                                     | 3.34E-05    | 0.326107386 |
| cg22003366 | PRR16;PRR16                         | 0.001376172 | 0.326063711 |
| cg10660916 | SLC5A5                              | 9.24E-05    | 0.326057535 |
| cg19246007 | COL21A1;COL21A1                     | 1.50E-05    | 0.326038324 |
| cg21607030 | EYA4;EYA4;EYA4                      | 0.001639597 | 0.32601194  |
| cg17588578 | PCDHGA2;PCDHGA3;PCDHGA1;PCDHGA3     | 0.000117986 | 0.326001965 |
| cg13264399 | EVX2                                | 8.60E-06    | 0.325996969 |
| cg10833037 | LOC100128811;GPR158                 | 2.58E-05    | 0.325996711 |
| cg15397448 | MAP9                                | 0.003189589 | 0.325992307 |
| cg02625902 | MAST4;MAST4                         | 0.004357816 | 0.325992216 |
| cg00541476 | SULF1;SULF1;SULF1;SULF1             | 3.34E-05    | 0.325990438 |
| cg06746829 | PADI2                               | 0.006823935 | 0.325990262 |
| cg09522056 |                                     | 5.59E-05    | 0.325981491 |
| cg11320910 |                                     | 5.59E-05    | 0.32595456  |
| cg11772171 | ASCL2                               | 0.003734675 | 0.325943587 |
| cg22070855 | GHSR;GHSR                           | 0.000187194 | 0.325914566 |
| cg21790851 | KLF5                                | 0.000233422 | 0.325911105 |
| cg06967120 | LOC100128811;GPR158                 | 8.60E-06    | 0.325908309 |
| cg10008589 |                                     | 0.003189589 | 0.325885828 |
| cg22757824 | COL4A1;COL4A2                       | 0.002304201 | 0.325880623 |
| cg20101352 | CPVL;CPVL                           | 0.00043997  | 0.325880139 |
| cg27564108 |                                     | 0.001147425 | 0.325878594 |
| cg17344091 | TRIM27                              | 0.003734675 | 0.325876874 |
| cg24176563 | EYA4;EYA4;EYA4;EYA4;EYA4;EYA4       | 0.001147425 | 0.325860833 |
| cg20772101 | EGFLAM;EGFLAM                       | 0.001639597 | 0.325836256 |
| cg09772792 |                                     | 0.000233422 | 0.325817194 |
| cg10239388 | WBSCR17                             | 0.004357816 | 0.325816073 |
| cg18725867 | GDNF;GDNF;GDNF                      | 0.003734675 | 0.325806937 |
| cg12345526 |                                     | 0.000187194 | 0.325803597 |
| cg13763503 | CTSL2;CTSL2                         | 0.000148457 | 0.32580204  |
| cg22859727 | FLRT2                               | 0.001376172 | 0.325799417 |
| cg03370738 | GRID1                               | 0.000187194 | 0.325781804 |
| cg04536807 | FKBP9                               | 0.003189589 | 0.325777899 |
| cg03593823 | GREM2                               | 0.001147425 | 0.325773916 |
| cg10500219 | MED8;C1orf84;MED8                   | 0.000537905 | 0.325772392 |
| cg26099134 | SIM1                                | 8.60E-06    | 0.325771048 |
| cg05385434 | EPHX1                               | 0.000117986 | 0.325762656 |
| cg25987744 | CCDC8;CCDC8                         | 0.00043997  | 0.325738838 |
| cg21567504 | OCA2                                | 0.000117986 | 0.325729359 |
| cg05871997 | BEND6;DST                           | 0.004357816 | 0.325728901 |
| cg22161476 | FSTL5;FSTL5;FSTL5;FSTL5;FSTL5;FSTL5 | 1.96E-05    | 0.325720033 |
| cg07891473 | ADAMTS9                             | 0.000290372 | 0.325713364 |
| cg11985360 | GSC2                                | 0.000187194 | 0.32571038  |
| cg19867991 | CALR                                | 5.59E-05    | 0.325698966 |

|            |                                      |             |             |
|------------|--------------------------------------|-------------|-------------|
| cg16976870 |                                      | 0.000654035 | 0.325697162 |
| cg01790346 | SAMD12;SAMD12                        | 0.000233422 | 0.325683038 |
| cg25655234 | SORCS2                               | 0.00041966  | 0.325678899 |
| cg04087740 | GPR27;EIF4E3;EIF4E3                  | 0.000233422 | 0.325661364 |
| cg15968604 | C5orf52                              | 0.000233422 | 0.325658673 |
| cg13698691 | TNXB                                 | 0.000654035 | 0.325657047 |
| cg09396865 |                                      | 9.24E-05    | 0.325640116 |
| cg20937016 | GALNTL1;GALNTL1                      | 0.000117986 | 0.325624686 |
| cg26958615 |                                      | 1.96E-05    | 0.325624149 |
| cg06804921 | SLC6A5                               | 4.34E-05    | 0.325624057 |
| cg00303982 | SCRT1                                | 0.000117986 | 0.325622048 |
| cg04949206 | HOXD11                               | 1.96E-05    | 0.325613917 |
| cg14238959 |                                      | 0.000148457 | 0.325612235 |
| cg27141474 | C2orf58                              | 0.000117986 | 0.325612024 |
| cg19656577 | PRMT8                                | 0.002927025 | 0.325604399 |
| cg01708273 | HOXD11                               | 0.002714607 | 0.325602193 |
| cg08426444 |                                      | 1.11E-05    | 0.325597408 |
| cg26692294 | UBE2QL1;UBE2QL1                      | 0.001639597 | 0.325591067 |
| cg23030278 | PYGO1                                | 1.11E-05    | 0.325543299 |
| cg22353329 | CBX4                                 | 0.000117986 | 0.325530594 |
| cg13661968 | SLC6A5                               | 0.000187194 | 0.325528711 |
| cg15266705 |                                      | 0.000290372 | 0.325517476 |
| cg20432960 | TFAP2B                               | 0.000117986 | 0.325513701 |
| cg22899100 |                                      | 1.96E-05    | 0.325513591 |
| cg08663552 |                                      | 9.24E-05    | 0.325497961 |
| cg04550697 | EXOC6B                               | 2.58E-05    | 0.325488564 |
| cg21047695 | NKAIN3                               | 0.000117986 | 0.325480707 |
| cg14329157 | WDR69                                | 8.60E-06    | 0.325480497 |
| cg01357892 | ZXDC;ZXDC                            | 0.000537905 | 0.325459338 |
| cg05575505 |                                      | 7.23E-05    | 0.325454629 |
| cg03297593 | MYEF2                                | 0.001147425 | 0.32545145  |
| cg04374393 | SOX14                                | 1.96E-05    | 0.325439222 |
| cg03521696 | HLA-G                                | 0.000187194 | 0.325434075 |
| cg15788369 |                                      | 1.50E-05    | 0.325429993 |
| cg14443519 | HCG4                                 | 0.00043997  | 0.325422102 |
| cg02260587 | PCDHB2;PCDHB2                        | 2.58E-05    | 0.325406576 |
| cg16439198 | CYP1B1                               | 4.34E-05    | 0.325397249 |
| cg01052879 | MIR124-3                             | 0.000955793 | 0.325389387 |
| cg03580568 | EDNRA;EDNRA;EDNRA                    | 9.04E-05    | 0.325381533 |
| cg01450522 |                                      | 0.000148457 | 0.325366598 |
| cg10736454 |                                      | 0.000791389 | 0.325360004 |
| cg10156366 |                                      | 0.005897668 | 0.325359201 |
| cg22451233 | PDGFC                                | 0.00043997  | 0.325351074 |
| cg09307788 |                                      | 8.60E-06    | 0.325347087 |
| cg07125112 | FRMD5                                | 5.59E-05    | 0.325338697 |
| cg00979288 | PCDHB2                               | 1.11E-05    | 0.325331404 |
| cg10899301 | TFAP2A;TFAP2A                        | 0.000233422 | 0.325320441 |
| cg17438849 | HECW1;HECW1                          | 0.000537905 | 0.325306978 |
| cg14289429 | FAM78A                               | 0.000148457 | 0.325299728 |
| cg08553437 | TMEM155;LOC100192379                 | 0.000654035 | 0.32527594  |
| cg04282138 |                                      | 2.58E-05    | 0.325275694 |
| cg01446217 | ERMP1                                | 0.00043997  | 0.325272023 |
| cg04174180 | ZNF23                                | 9.24E-05    | 0.325261848 |
| cg06388730 |                                      | 4.34E-05    | 0.325251617 |
| cg14326671 | LOC100192378                         | 0.000117986 | 0.325247905 |
| cg00946992 |                                      | 2.58E-05    | 0.325237248 |
| cg02763800 |                                      | 1.50E-05    | 0.325230036 |
| cg16483916 | PLAC2                                | 0.000290372 | 0.325219927 |
| cg23497217 | BDNF;BDNF;BDNF;BDNF;BDNF;BDNF;BDNF;B | 0.000117986 | 0.325219207 |
| cg15475851 | INA                                  | 0.000187194 | 0.325219084 |

|            |                                         |             |             |
|------------|-----------------------------------------|-------------|-------------|
| cg16105558 | KCND2                                   | 0.00043997  | 0.325208136 |
| cg23143978 | RBM33                                   | 0.000955793 | 0.325200797 |
| cg05408649 | HOXC4                                   | 0.003734675 | 0.325187917 |
| cg01534145 | CREB5                                   | 0.004357816 | 0.325175355 |
| cg11674865 |                                         | 0.000955793 | 0.325162646 |
| cg02054108 | USP34                                   | 1.11E-05    | 0.325154712 |
| cg16435779 | GRHL2                                   | 7.23E-05    | 0.325150101 |
| cg01146063 | CTNNA2;CTNNA2                           | 5.59E-05    | 0.325146763 |
| cg22030890 | RAB32                                   | 0.000117986 | 0.32514558  |
| cg05352087 | LHX8                                    | 5.59E-05    | 0.325145448 |
| cg24172509 | PCDHGA4;PCDHGB5;PCDHGA6;PCDHGA1;PCDHGA2 | 0.001639597 | 0.325138859 |
| cg13496323 | HMCN1                                   | 0.000290372 | 0.325131202 |
| cg00142402 |                                         | 4.34E-05    | 0.325125272 |
| cg24406240 |                                         | 0.001376172 | 0.325112631 |
| cg22636108 |                                         | 5.59E-05    | 0.3251106   |
| cg01044025 |                                         | 0.000233422 | 0.325093321 |
| cg14054620 | C9orf122                                | 0.002304201 | 0.325080434 |
| cg15385562 | FBN1                                    | 0.002304201 | 0.325079801 |
| cg19431274 |                                         | 0.000357885 | 0.325078495 |
| cg22508969 | HMGCLL1;HMGCLL1                         | 0.000187194 | 0.325076344 |
| cg12640000 | L1TD1;L1TD1                             | 8.60E-06    | 0.325070333 |
| cg06733794 | TACC2;TACC2;TACC2;TACC2                 | 0.000117986 | 0.325057891 |
| cg16713889 | FAM161B                                 | 0.004357816 | 0.325052595 |
| cg24502330 | CDA                                     | 0.000148457 | 0.325048094 |
| cg18731327 | ZIC4;ZIC4;ZIC4                          | 2.58E-05    | 0.325042306 |
| cg15971010 | SLC47A1                                 | 0.00043997  | 0.325030496 |
| cg12095167 | RAB2A                                   | 1.96E-05    | 0.32502209  |
| cg00126320 |                                         | 0.000290372 | 0.325020205 |
| cg21354781 |                                         | 0.000117986 | 0.325012826 |
| cg07193041 | ERC2                                    | 0.00043997  | 0.32500921  |
| cg15855970 |                                         | 1.50E-05    | 0.32500789  |
| cg20531020 | SLC16A3;SLC16A3                         | 2.58E-05    | 0.325004471 |
| cg11070172 | CEBPE                                   | 0.000233422 | 0.325000085 |
| cg01369406 | ANKRD5;ANKRD5                           | 0.00043997  | 0.324992676 |
| cg00037441 | RFX6;RFX6                               | 1.96E-05    | 0.324987143 |
| cg12749559 | BRP44;BRP44;BRP44                       | 0.000791389 | 0.324986306 |
| cg25602684 | GDNF                                    | 0.001147425 | 0.324985613 |
| cg22153407 | GALNT2                                  | 0.000290372 | 0.324967579 |
| cg16108059 | TSHR;TSHR;TSHR;TSHR;TSHR;TSHR           | 0.001639597 | 0.324960235 |
| cg03009871 | MAGI2                                   | 2.58E-05    | 0.324958994 |
| cg06132727 |                                         | 0.000654035 | 0.324946575 |
| cg19370684 | PRKCZ                                   | 0.006823935 | 0.324942855 |
| cg05317851 |                                         | 4.34E-05    | 0.324939815 |
| cg21188710 |                                         | 0.001639597 | 0.324929248 |
| cg14845216 | RASGEF1A                                | 2.58E-05    | 0.324923343 |
| cg21990700 | LOC283314;C1RL                          | 0.000955793 | 0.324923294 |
| cg14221171 | TAC1;TAC1;TAC1;TAC1                     | 4.34E-05    | 0.324917434 |
| cg07861790 |                                         | 1.50E-05    | 0.32491365  |
| cg09556138 | EPHA4                                   | 0.000791389 | 0.32490924  |
| cg00180447 | CHST13                                  | 2.58E-05    | 0.324905951 |
| cg15444947 | TRIL                                    | 0.002304201 | 0.324892159 |
| cg19640130 | RTKN2                                   | 0.000290372 | 0.324876666 |
| cg27340506 | PSKH2                                   | 5.59E-05    | 0.324868318 |
| cg10425624 | TTC8;TTC8;TTC8                          | 0.000537905 | 0.324864128 |
| cg10171347 | NKX6-2                                  | 1.50E-05    | 0.32486059  |
| cg02058108 | SSPN;SSPN                               | 0.000290372 | 0.324856708 |
| cg02639108 |                                         | 8.60E-06    | 0.324855276 |
| cg21615583 | MIR375                                  | 0.001147425 | 0.324851934 |
| cg11398020 | KLF5                                    | 0.000148457 | 0.324833019 |
| cg25713185 | SLC19A3                                 | 0.00043997  | 0.324816818 |

|            |                                     |             |             |
|------------|-------------------------------------|-------------|-------------|
| cg07290552 | FAM164A                             | 0.000654035 | 0.324813936 |
| cg17095728 | TRIM67                              | 3.34E-05    | 0.324811653 |
| cg10265570 | RTBDN                               | 9.24E-05    | 0.324811461 |
| cg03471150 | IPO9                                | 4.34E-05    | 0.324807755 |
| cg18759102 | PRDM16;PRDM16                       | 0.00043997  | 0.324801345 |
| cg09418063 | ZNF208                              | 0.000537905 | 0.324800183 |
| cg24775496 | FLRT2                               | 0.001376172 | 0.324795266 |
| cg02622052 | CNTN1;CNTN1                         | 7.23E-05    | 0.324771098 |
| cg15552461 | RDH13                               | 0.000233422 | 0.324768353 |
| cg11104510 | ETV1;ETV1;ETV1;ETV1;ETV1;ETV1       | 0.000537905 | 0.324767537 |
| cg00235367 | ZIC4;ZIC4;ZIC4;ZIC4;ZIC4            | 1.11E-05    | 0.324758673 |
| cg13804575 | ZNF462                              | 0.001639597 | 0.324756383 |
| cg01194057 | UNC5C                               | 0.001948248 | 0.324755533 |
| cg04299135 | BARX2                               | 0.003189589 | 0.324738357 |
| cg06497198 | NHLRC1                              | 0.000537905 | 0.324723755 |
| cg00353773 | CXCL12;CXCL12;CXCL12                | 0.003734675 | 0.324719407 |
| cg17304646 |                                     | 3.34E-05    | 0.324706546 |
| cg24682551 | SLC22A15                            | 0.00043997  | 0.324686261 |
| cg07917609 | RXFP3                               | 1.11E-05    | 0.324682227 |
| cg11518846 | EYA4;EYA4;EYA4                      | 0.000654035 | 0.324679997 |
| cg10323921 |                                     | 1.11E-05    | 0.324664518 |
| cg17510653 | ENTPD7                              | 4.34E-05    | 0.324660279 |
| cg26468007 | MMD2;MMD2;MMD2;MMD2                 | 7.23E-05    | 0.324656316 |
| cg13371951 | GRM1;GRM1                           | 0.000117986 | 0.324650721 |
| cg16510548 | LOC401463                           | 0.000290372 | 0.324646299 |
| cg26610624 | PRKCZ                               | 0.002304201 | 0.32464202  |
| cg11670519 | BMP7;BMP7                           | 0.000334462 | 0.324640687 |
| cg16015712 | ZYG11A                              | 0.000537905 | 0.324635114 |
| cg01371155 | ESRRG;ESRRG;ESRRG;ESRRG;ESRRG       | 0.000148457 | 0.32462948  |
| cg13470069 | RAB5C;RAB5C                         | 0.001376172 | 0.324620646 |
| cg13770461 | PHF21A;PHF21A                       | 9.24E-05    | 0.32461821  |
| cg17171215 |                                     | 5.59E-05    | 0.324613447 |
| cg15108641 | UBTD1                               | 0.00043997  | 0.324607372 |
| cg04106782 |                                     | 0.000122184 | 0.324606575 |
| cg07634645 | PLBD1                               | 4.34E-05    | 0.324586203 |
| cg17691292 | ESRP1;ESRP1;ESRP1;ESRP1;ESRP1       | 0.000187194 | 0.324562868 |
| cg23444265 | GRIN2D                              | 9.24E-05    | 0.32455977  |
| cg12196232 | NRG1;NRG1;NRG1;NRG1;NRG1;NRG1;NRG1; | 8.60E-06    | 0.324559188 |
| cg15905435 |                                     | 0.000148457 | 0.324552466 |
| cg19538655 | PAX9                                | 0.000187194 | 0.324520659 |
| cg18482268 | POU4F3                              | 0.000290372 | 0.324519967 |
| cg16373229 | FEZF1;FEZF1                         | 8.60E-06    | 0.324518311 |
| cg14251622 | INSM2                               | 0.00043997  | 0.324500458 |
| cg08318212 | EDN3;EDN3;EDN3;EDN3                 | 0.003189589 | 0.324480779 |
| cg27517681 | TBX15                               | 0.000148457 | 0.324478824 |
| cg25936147 | HOXC13                              | 1.11E-05    | 0.324475098 |
| cg15433534 |                                     | 0.003734675 | 0.324465087 |
| cg17617843 | C1QTNF3;C1QTNF3                     | 0.001639597 | 0.324452493 |
| cg05947443 | PLA2G7;PLA2G7                       | 5.59E-05    | 0.324448783 |
| cg01774159 | STMN2                               | 0.000148457 | 0.324440626 |
| cg08488841 |                                     | 7.23E-05    | 0.324432762 |
| cg10245910 | FAM155A                             | 2.58E-05    | 0.324429895 |
| cg23950724 | SYT10                               | 1.11E-05    | 0.324429754 |
| cg13466002 | ARRB2;ARRB2                         | 0.000654035 | 0.324426011 |
| cg15396686 | HMX3                                | 0.000117986 | 0.324424348 |
| cg10580056 | ACTC1                               | 0.000122184 | 0.324392083 |
| cg16063747 | EMX2OS                              | 0.000117986 | 0.324386488 |
| cg16840358 |                                     | 3.34E-05    | 0.324386181 |
| cg13776340 | ELOVL4                              | 4.34E-05    | 0.324358706 |
| cg10334354 | EPHA5;EPHA5                         | 7.23E-05    | 0.324357418 |

|            |                                     |             |             |
|------------|-------------------------------------|-------------|-------------|
| cg04603419 | PYY                                 | 7.23E-05    | 0.32435129  |
| cg26668837 | STK33;STK33                         | 8.60E-06    | 0.32434988  |
| cg13564825 | PPP1R14A                            | 3.34E-05    | 0.324347319 |
| cg21639114 |                                     | 0.000148457 | 0.324344979 |
| cg08145590 | C3orf15                             | 0.000187194 | 0.324341641 |
| cg27382568 |                                     | 5.59E-05    | 0.32434045  |
| cg16919517 | GATA5                               | 0.000654035 | 0.324331148 |
| cg27170985 |                                     | 1.50E-05    | 0.324305244 |
| cg03388789 | ZIC4;ZIC4;ZIC4                      | 5.59E-05    | 0.324296117 |
| cg13035910 |                                     | 0.000290372 | 0.32429342  |
| cg20732703 | GRB10;GRB10;GRB10;GRB10             | 0.000357885 | 0.324289144 |
| cg04986504 | DKK3;DKK3;DKK3                      | 0.001948248 | 0.324287171 |
| cg23967169 | FAM19A4;FAM19A4;FAM19A4;FAM19A4     | 5.59E-05    | 0.324267523 |
| cg05059304 | SYCP2L                              | 0.000148457 | 0.324265418 |
| cg21081803 |                                     | 7.23E-05    | 0.324260981 |
| cg02512226 | ARMC4                               | 0.002714607 | 0.324259647 |
| cg17852032 | ZDHHC14;ZDHHC14                     | 0.000290372 | 0.324253551 |
| cg04982308 | BTBD17                              | 0.000357885 | 0.324250411 |
| cg25213546 | SH3GL3;SH3GL3                       | 8.60E-06    | 0.324248406 |
| cg24650501 | LMX1A;LMX1A                         | 1.50E-05    | 0.324224852 |
| cg18532727 | C17orf51;C17orf51                   | 0.002714607 | 0.32422411  |
| cg15086439 | EDARADD;EDARADD                     | 0.001376172 | 0.324199722 |
| cg04484947 | ZBTB8B                              | 0.000148457 | 0.324186882 |
| cg14041338 | ENOX1;ENOX1                         | 0.000187194 | 0.324184439 |
| cg05143123 | SPOCK1;SPOCK1                       | 0.000791389 | 0.32417832  |
| cg26757221 |                                     | 1.96E-05    | 0.324164603 |
| cg03839794 | NPAS3;NPAS3;NPAS3;NPAS3             | 1.50E-05    | 0.324129616 |
| cg00315391 | SCNN1G                              | 0.000654035 | 0.324128614 |
| cg26591696 | COL5A3                              | 4.34E-05    | 0.324128376 |
| cg06671450 | PAX5                                | 0.000148457 | 0.324117294 |
| cg23211240 | MIR34B;BTG4;MIR34C                  | 0.000537905 | 0.324117241 |
| cg21527621 | ACOT11;ACOT11                       | 0.000357885 | 0.324110296 |
| cg02994956 | NEFH                                | 2.39E-05    | 0.324107483 |
| cg24748191 |                                     | 3.34E-05    | 0.324099152 |
| cg15423872 | FAM110B                             | 9.24E-05    | 0.324099119 |
| cg04470072 | PSKH2                               | 0.000117986 | 0.324078096 |
| cg10197432 | C6orf103                            | 0.000791389 | 0.324075818 |
| cg10423771 |                                     | 0.000187194 | 0.324062229 |
| cg08141553 | GALNT2                              | 1.11E-05    | 0.32406174  |
| cg14932016 | ACTN2                               | 0.000187194 | 0.324053792 |
| cg06528267 | VWC2                                | 0.000955793 | 0.324037964 |
| cg18342026 |                                     | 1.50E-05    | 0.324025114 |
| cg04087271 | CDA                                 | 0.000791389 | 0.324022199 |
| cg09970569 | RSPO2                               | 1.50E-05    | 0.324020075 |
| cg07935500 | ARNT2                               | 0.000791389 | 0.324012578 |
| cg13948585 | CACNA1E                             | 0.000148457 | 0.323999568 |
| cg02340541 | GAL                                 | 0.001639597 | 0.323975874 |
| cg21029612 | LOC254559                           | 2.58E-05    | 0.323970622 |
| cg04295372 | VCAM1;VCAM1                         | 0.000148457 | 0.323962051 |
| cg26776269 |                                     | 4.34E-05    | 0.323938783 |
| cg10556349 |                                     | 0.000187194 | 0.323922848 |
| cg12765028 |                                     | 1.50E-05    | 0.323918405 |
| cg12173409 |                                     | 7.23E-05    | 0.323915628 |
| cg05059291 |                                     | 0.000262362 | 0.323906732 |
| cg00673191 | DOPEY2                              | 9.24E-05    | 0.323905697 |
| cg14811608 | NPY2R                               | 2.80E-05    | 0.323903049 |
| cg07160932 | SEZ6L2;SEZ6L2;SEZ6L2;SEZ6L2         | 0.000537905 | 0.32389472  |
| cg08032135 | NRG1;NRG1;NRG1;NRG1;NRG1;NRG1;NRG1; | 9.24E-05    | 0.323894525 |
| cg10554264 | PTPRN2;PTPRN2;PTPRN2                | 0.000187194 | 0.323888985 |
| cg24115032 | APCDD1L                             | 8.60E-06    | 0.323868718 |



|            |                                         |             |             |
|------------|-----------------------------------------|-------------|-------------|
| cg08577743 | C9orf122;ANKRD18A                       | 0.000117986 | 0.323864538 |
| cg23733133 |                                         | 3.34E-05    | 0.323858915 |
| cg04455164 | DPY19L2                                 | 0.000654035 | 0.32385379  |
| cg22855255 | CA10;CA10;CA10                          | 0.000117986 | 0.323849682 |
| cg16745446 | FAM189A1                                | 0.000233422 | 0.323835458 |
| cg24541426 | HOXD3                                   | 0.000117986 | 0.323828214 |
| cg14582763 | ZNF578                                  | 0.000357885 | 0.323821111 |
| cg17130457 |                                         | 0.006823935 | 0.323809722 |
| cg22271921 | ZMAT4;ZMAT4                             | 1.50E-05    | 0.323798831 |
| cg11418595 | HOXD1                                   | 0.001948248 | 0.323776486 |
| cg18440199 | LOC283392;TRHDE;LOC283392               | 0.000357885 | 0.323768469 |
| cg19677302 | PKP2;PKP2                               | 9.24E-05    | 0.323743856 |
| cg21656751 | HECW1                                   | 0.000117986 | 0.32374155  |
| cg25203481 | KCNQ1DN                                 | 0.000955793 | 0.323737205 |
| cg19935951 | LRBA                                    | 7.23E-05    | 0.32373424  |
| cg15948088 | C11orf87                                | 7.23E-05    | 0.32372895  |
| cg06152533 | LRRN1                                   | 9.24E-05    | 0.323725845 |
| cg17862332 | ARMC4                                   | 5.59E-05    | 0.323707925 |
| cg05256504 |                                         | 7.23E-05    | 0.323698522 |
| cg25237016 | SPTBN4                                  | 1.50E-05    | 0.323697398 |
| cg09734761 |                                         | 0.000357885 | 0.323691174 |
| cg00922781 | ADAM12;ADAM12;ADAM12;ADAM12             | 8.60E-06    | 0.323689606 |
| cg03744383 | CES1;CES1;CES1;CES1;CES1;CES1           | 4.34E-05    | 0.323689099 |
| cg22334880 | RPP21                                   | 1.96E-05    | 0.323684517 |
| cg02867763 | PCDHGA4;PCDHGA4;PCDHGA2;PCDHGA1;PCDHGA1 | 1.96E-05    | 0.323673119 |
| cg22127848 |                                         | 7.23E-05    | 0.323641869 |
| cg19509715 |                                         | 0.000537905 | 0.323641708 |
| cg25338454 | ITPR2                                   | 0.001639597 | 0.323621382 |
| cg07820868 | TBX15                                   | 0.003189589 | 0.323592707 |
| cg07278054 |                                         | 1.96E-05    | 0.32358641  |
| cg06048524 | CXCL12;CXCL12;CXCL12                    | 0.005897668 | 0.32358345  |
| cg21921460 | CTNND2                                  | 4.34E-05    | 0.323569726 |
| cg05396212 | KRT19                                   | 9.24E-05    | 0.323560027 |
| cg13687570 | HKR1                                    | 0.000117986 | 0.323557196 |
| cg10043253 | SLC13A5;SLC13A5                         | 0.003734675 | 0.323551715 |
| cg07712198 |                                         | 0.00043997  | 0.323549598 |
| cg06749715 | PAX9                                    | 9.24E-05    | 0.323535849 |
| cg15842276 | MTNR1B                                  | 1.50E-05    | 0.32353046  |
| cg12363682 | GRM6                                    | 0.001147425 | 0.323520871 |
| cg13686115 | PHYHIPL;PHYHIPL                         | 1.50E-05    | 0.323511179 |
| cg18739675 |                                         | 0.001147425 | 0.323505093 |
| cg17029354 |                                         | 1.50E-05    | 0.323504035 |
| cg12530050 | TBX3;TBX3;TBX3;TBX3                     | 0.000233422 | 0.323492799 |
| cg22435791 |                                         | 0.000187194 | 0.323484004 |
| cg00455327 | CABLES1                                 | 0.001147425 | 0.32347565  |
| cg21635854 |                                         | 0.000290372 | 0.32346565  |
| cg27262041 | NAV2                                    | 7.23E-05    | 0.323442325 |
| cg20132590 | PDZRN3                                  | 1.50E-05    | 0.323421601 |
| cg18206027 | VWC2;VWC2                               | 0.001376172 | 0.32342121  |
| cg03984209 | ERC2                                    | 0.001393182 | 0.323420287 |
| cg03339065 | EMX2;EMX2OS;EMX2                        | 0.00043997  | 0.323414694 |
| cg14152139 |                                         | 5.11E-05    | 0.323398445 |
| cg08632909 | FADD                                    | 0.000357885 | 0.323398394 |
| cg07201475 |                                         | 0.000357885 | 0.323398049 |
| cg10371414 |                                         | 0.00043997  | 0.323393763 |
| cg13000912 | PRDM13                                  | 1.11E-05    | 0.323364792 |
| cg06859084 |                                         | 4.34E-05    | 0.323364392 |
| cg17191462 | TFAP2D                                  | 3.34E-05    | 0.323364272 |
| cg18222653 |                                         | 0.000537905 | 0.323364129 |
| cg26814075 | LEP                                     | 3.34E-05    | 0.323361791 |

|            |                                      |             |             |
|------------|--------------------------------------|-------------|-------------|
| cg18702820 | SSPN;SSPN                            | 0.000233422 | 0.323338733 |
| cg13509363 | C9orf172                             | 1.11E-05    | 0.323338514 |
| cg03164275 | CDK5R2;CDK5R2                        | 9.24E-05    | 0.323338186 |
| cg22799321 | TFPI2                                | 5.59E-05    | 0.323325317 |
| cg21972382 | CLIP4                                | 0.001147425 | 0.32329078  |
| cg05756489 | HTR7;HTR7;HTR7                       | 9.24E-05    | 0.323288654 |
| cg04937144 |                                      | 3.34E-05    | 0.323288215 |
| cg08291024 | LMX1A                                | 9.24E-05    | 0.323281658 |
| cg02032558 |                                      | 0.000654035 | 0.323274923 |
| cg04168853 |                                      | 9.24E-05    | 0.323259156 |
| cg03556669 | TNXB                                 | 0.001061731 | 0.323249462 |
| cg06838365 | LHFPL4                               | 2.58E-05    | 0.323245141 |
| cg23031493 | LHX5                                 | 0.000290372 | 0.323239251 |
| cg12720643 | FAM163A                              | 1.11E-05    | 0.323237832 |
| cg12853184 | SLC30A9                              | 0.001639597 | 0.323237186 |
| cg14508391 |                                      | 7.23E-05    | 0.32322674  |
| cg13059411 | KCND3;KCND3                          | 3.34E-05    | 0.323219358 |
| cg13504245 | NTRK2;NTRK2                          | 0.001376172 | 0.32320866  |
| cg04106092 |                                      | 5.59E-05    | 0.323198084 |
| cg20576153 | SIX6                                 | 4.34E-05    | 0.323183528 |
| cg01316476 |                                      | 0.000791389 | 0.323182399 |
| cg25979559 | NHLH2;NHLH2                          | 0.002714607 | 0.32315088  |
| cg17894318 | SOX2OT                               | 4.34E-05    | 0.323112883 |
| cg05477024 | KIAA1804                             | 1.96E-05    | 0.323099591 |
| cg22190023 | PCDHB7;PCDHB7                        | 0.000357885 | 0.323097194 |
| cg04457114 |                                      | 1.11E-05    | 0.323093838 |
| cg11511795 |                                      | 0.003734675 | 0.323082423 |
| cg04641171 | RASGRF1;RASGRF1                      | 7.23E-05    | 0.323058847 |
| cg21867345 | ZNF167;ZNF167                        | 0.000290372 | 0.323039389 |
| cg06262436 | ISM1                                 | 0.001948248 | 0.323037854 |
| cg26689483 | QDPR                                 | 0.007873393 | 0.323028882 |
| cg10112391 | DPP4                                 | 0.000526175 | 0.323021945 |
| cg01912921 | FOXC1                                | 0.000187194 | 0.323004664 |
| cg10838385 |                                      | 1.11E-05    | 0.322995269 |
| cg10726816 |                                      | 0.000117986 | 0.322991643 |
| cg26998537 | OTX2                                 | 0.000117986 | 0.322989399 |
| cg12210040 | LMO3;LMO3;LMO3                       | 8.60E-06    | 0.322985039 |
| cg14161359 | KCNA4                                | 0.000187194 | 0.322975603 |
| cg13175739 | STYK1                                | 1.50E-05    | 0.322966157 |
| cg01012879 | ADSS                                 | 3.34E-05    | 0.322964955 |
| cg26877720 | FAM107B                              | 0.000117986 | 0.322964731 |
| cg01286685 | RNF39;RNF39                          | 0.000290372 | 0.322960842 |
| cg26335633 |                                      | 0.000233422 | 0.322954005 |
| cg05617469 | ZIC5                                 | 5.59E-05    | 0.322950839 |
| cg18371475 | IRX2;IRX2;C5orf38;IRX2;IRX2          | 0.001147425 | 0.322933085 |
| cg18138206 | TCERG1L                              | 4.34E-05    | 0.322928433 |
| cg10261191 | FEZ1;FEZ1                            | 9.24E-05    | 0.322914083 |
| cg06664357 | DLL3;DLL3                            | 0.000117986 | 0.322904919 |
| cg11789820 | SLC35F4                              | 9.24E-05    | 0.322889724 |
| cg03669782 |                                      | 2.58E-05    | 0.322889062 |
| cg26143045 | TMEM108;TMEM108                      | 0.000357885 | 0.322886656 |
| cg16994041 | PRKAG2;PRKAG2                        | 0.004357816 | 0.322883522 |
| cg23726537 | CRCT1                                | 9.24E-05    | 0.322877244 |
| cg20880339 |                                      | 1.96E-05    | 0.322852522 |
| cg14783581 | SOX14                                | 1.96E-05    | 0.32284998  |
| cg19802138 | SOX1                                 | 0.000537905 | 0.322845321 |
| cg25215292 | FBXL21                               | 0.000187194 | 0.322839152 |
| cg17263974 | PCSK6;PCSK6;PCSK6;PCSK6;PCSK6;PCSK6; | 0.000117986 | 0.322835617 |
| cg14701867 | ZNF365;ZNF365                        | 0.000537905 | 0.322831318 |
| cg24320612 | GATA5                                | 0.00043997  | 0.322824287 |

|            |                                   |             |             |
|------------|-----------------------------------|-------------|-------------|
| cg04745673 |                                   | 0.000233422 | 0.322794881 |
| cg20640433 | LAMA2;LAMA2                       | 0.000187194 | 0.322781361 |
| cg12538248 | CA8                               | 0.000955793 | 0.3227764   |
| cg19356825 | FLJ42875;PRDM16;PRDM16;FLJ42875   | 0.001376172 | 0.322760979 |
| cg03700287 | PCDHB19P                          | 1.11E-05    | 0.322732087 |
| cg17983957 | AMICA1;AMICA1;AMICA1              | 0.000148457 | 0.322724723 |
| cg15188182 | C2CD4B                            | 8.60E-06    | 0.322723643 |
| cg14244013 |                                   | 4.34E-05    | 0.322722309 |
| cg21196747 |                                   | 7.23E-05    | 0.322719089 |
| cg09986292 |                                   | 9.24E-05    | 0.322716673 |
| cg01229865 | ATP11A;ATP11A                     | 0.002714607 | 0.322716497 |
| cg10148473 | KCNC2;KCNC2;KCNC2                 | 0.000233422 | 0.322715767 |
| cg20996682 | MAGI2                             | 2.58E-05    | 0.322708107 |
| cg13411784 | WDR85                             | 0.001376172 | 0.322701343 |
| cg03365437 | ALDH1A2;ALDH1A2;ALDH1A2;ALDH1A2   | 8.60E-06    | 0.32268051  |
| cg15894431 | YAP1;YAP1                         | 0.003734675 | 0.3226789   |
| cg27407935 | SREBF1;SREBF1                     | 0.000537905 | 0.322649913 |
| cg06072036 | PNPLA2                            | 0.00043997  | 0.322637589 |
| cg14304817 | NAALAD2;NAALAD2                   | 0.001061731 | 0.32262853  |
| cg15829006 | OLFM1;OLFM1                       | 8.60E-06    | 0.322626164 |
| cg01718139 | VSTM1                             | 0.002714607 | 0.322612281 |
| cg05568930 |                                   | 0.000187194 | 0.322604133 |
| cg02895156 |                                   | 8.60E-06    | 0.322579718 |
| cg02558364 | VAX2                              | 0.001147425 | 0.322570857 |
| cg14478163 | ANKRD34B                          | 5.59E-05    | 0.322570179 |
| cg20130213 | FRMD4A                            | 1.50E-05    | 0.322561804 |
| cg14372701 | FAM181B                           | 0.000233422 | 0.322559718 |
| cg06617341 |                                   | 0.000357885 | 0.322556171 |
| cg15623612 | LSAMP                             | 0.00043997  | 0.32254447  |
| cg24617723 | ZSWIM2                            | 0.000117986 | 0.322542321 |
| cg17178336 | IHH                               | 0.000357885 | 0.322516978 |
| cg18174928 | LIFR;LIFR                         | 0.001376172 | 0.322476231 |
| cg05928342 | ZNF177                            | 9.24E-05    | 0.322473617 |
| cg26656658 | P2RX7                             | 3.34E-05    | 0.322465942 |
| cg14531530 | LIMCH1;LIMCH1;LIMCH1              | 0.000148457 | 0.322462093 |
| cg23782083 | ASH2L;ASH2L                       | 0.000187194 | 0.322455676 |
| cg14810013 | EPHA5;EPHA5                       | 1.50E-05    | 0.322453888 |
| cg03478689 | EDIL3                             | 0.000290372 | 0.32242857  |
| cg09313439 | CDH2;CDH2                         | 0.001376172 | 0.322410023 |
| cg25781755 |                                   | 0.000955793 | 0.322403578 |
| cg23795893 | PGR                               | 0.000233422 | 0.322369354 |
| cg19342109 | SYNE1;SYNE1                       | 0.000148457 | 0.322359833 |
| cg20995055 | NELL2;NELL2;NELL2;NELL2;NELL2     | 0.00043997  | 0.322353996 |
| cg23462956 |                                   | 0.000290372 | 0.322340832 |
| cg21453451 | SOX2OT                            | 0.000148457 | 0.32233961  |
| cg19605250 | RAD21L1;RAD21L1                   | 0.000233422 | 0.322334239 |
| cg26435698 |                                   | 4.34E-05    | 0.322332883 |
| cg17713376 |                                   | 7.23E-05    | 0.322330378 |
| cg26820055 | ARHGEF4;ARHGEF4                   | 0.000187194 | 0.322320443 |
| cg03609614 | ZNF300;ZNF300                     | 0.007873393 | 0.322305071 |
| cg21638161 | MAFA                              | 0.000148457 | 0.322303393 |
| cg16924616 | DLX5                              | 0.001639597 | 0.322299019 |
| cg23489627 | PDZRN3                            | 8.60E-06    | 0.322282299 |
| cg07859640 | PCDHB3                            | 9.24E-05    | 0.322276035 |
| cg24333621 | SLC35B4                           | 5.59E-05    | 0.32227459  |
| cg05680531 | CHRM2;CHRM2;CHRM2;CHRM2;CHRM2;CHR | 3.34E-05    | 0.322264853 |
| cg03304528 | JAM3                              | 0.000148457 | 0.322263138 |
| cg00686880 | RIPK4                             | 1.11E-05    | 0.322262631 |
| cg07577997 | C1orf161                          | 0.000357885 | 0.322260765 |
| cg02169734 | ELOVL4                            | 1.50E-05    | 0.322242435 |

|            |                                         |             |             |
|------------|-----------------------------------------|-------------|-------------|
| cg23889772 | COL5A3                                  | 1.96E-05    | 0.322226307 |
| cg20512711 |                                         | 0.001147425 | 0.322222993 |
| cg10345326 | LUZP2                                   | 0.001376172 | 0.322220047 |
| cg17462793 | KCNV1                                   | 1.50E-05    | 0.32221988  |
| cg18199666 | CHAT;CHAT;CHAT;CHAT;CHAT;CHAT;CHAT      | 2.58E-05    | 0.322217254 |
| cg02790177 | PPAPDC1A                                | 9.24E-05    | 0.322214013 |
| cg09792881 | DMRTA2                                  | 0.000290372 | 0.322204493 |
| cg01445809 | KCNB1                                   | 0.000357885 | 0.322193946 |
| cg05235392 | HCN4                                    | 0.000233422 | 0.32217812  |
| cg06270661 | DNAH11                                  | 3.34E-05    | 0.322174338 |
| cg02049955 | SCN2B                                   | 0.000117986 | 0.322172242 |
| cg06655623 | RASGEF1A                                | 0.000148457 | 0.322165581 |
| cg00386408 | TGFBI                                   | 0.00043997  | 0.322162285 |
| cg02996413 | LOC100192426;PTPRM;PTPRM                | 0.000791389 | 0.322160856 |
| cg23213887 | FBN2                                    | 0.000187194 | 0.322158776 |
| cg03617826 | PCDHGA2;PCDHGA2;PCDHGA2;PCDHGA1;PCDHGA1 | 0.000148457 | 0.32215336  |
| cg20209956 | CCKBR                                   | 3.34E-05    | 0.322137757 |
| cg25856888 |                                         | 0.000187194 | 0.322132363 |
| cg14618996 | ADAM32                                  | 1.50E-05    | 0.322128631 |
| cg04583232 | SLC17A6                                 | 4.34E-05    | 0.322109583 |
| cg14579239 | PCDHA6;PCDHA2;PCDHA1;PCDHA8;PCDHA7      | 0.000117986 | 0.322081355 |
| cg02798621 | FAM46A                                  | 0.001147425 | 0.322066506 |
| cg15742412 | CACNA1E                                 | 0.000148457 | 0.322065192 |
| cg02893180 | ADM2                                    | 0.006823935 | 0.322061091 |
| cg15396570 | DDAH1;DDAH1                             | 4.34E-05    | 0.322051718 |
| cg17720087 |                                         | 1.11E-05    | 0.322049897 |
| cg09676860 | RAB6C;RAB6C                             | 1.11E-05    | 0.322047661 |
| cg19902394 | PPP1R3C                                 | 0.001948248 | 0.322044212 |
| cg19829847 | PITX2;PITX2                             | 0.0050758   | 0.322030993 |
| cg16309595 |                                         | 9.04E-05    | 0.322016399 |
| cg13945578 | NPY5R                                   | 3.34E-05    | 0.322014018 |
| cg12718339 | TMTC1                                   | 8.60E-06    | 0.322001029 |
| cg26917540 | ULK2;ULK2                               | 0.00043997  | 0.321998361 |
| cg00891541 | SMPD3                                   | 3.34E-05    | 0.321995142 |
| cg08690094 |                                         | 1.11E-05    | 0.321992067 |
| cg01765529 | CD164L2                                 | 0.001376172 | 0.321990246 |
| cg02938414 |                                         | 8.60E-06    | 0.321986437 |
| cg02801359 |                                         | 5.59E-05    | 0.321985583 |
| cg22932815 | NELL2;NELL2;NELL2;NELL2;NELL2           | 0.007873393 | 0.321976793 |
| cg02486086 |                                         | 0.000791389 | 0.321959234 |
| cg01654582 | AADAT;AADAT                             | 0.000117986 | 0.321954208 |
| cg10264012 |                                         | 8.60E-06    | 0.321944886 |
| cg06110297 |                                         | 5.59E-05    | 0.321942461 |
| cg04675542 | ZNF300                                  | 0.001948248 | 0.321935805 |
| cg01902845 | PROX1                                   | 5.59E-05    | 0.321930391 |
| cg06743703 |                                         | 0.000187194 | 0.321883235 |
| cg27562682 |                                         | 0.000117986 | 0.321860712 |
| cg16415870 | GRM7;GRM7                               | 1.96E-05    | 0.321859899 |
| cg26728709 | ARSJ                                    | 0.000791389 | 0.321837279 |
| cg07902749 |                                         | 0.007873393 | 0.321828612 |
| cg18268562 | FOXR1                                   | 1.96E-05    | 0.321817001 |
| cg12782294 | PLD1;PLD1                               | 0.002714607 | 0.321791631 |
| cg16051361 | RAB21                                   | 0.000654035 | 0.321786565 |
| cg02047300 | PCDHA6;PCDHA2;PCDHA1;PCDHA1;PCDHA6      | 0.000357885 | 0.32178203  |
| cg05190176 | VDR;VDR                                 | 0.000148457 | 0.321778696 |
| cg02919615 | EFNA2                                   | 0.000117986 | 0.321774255 |
| cg12214908 | MEIS3;MEIS3                             | 0.000233422 | 0.321764402 |
| cg22736787 | PTGFRN                                  | 0.004357816 | 0.321729751 |
| cg11600734 | ITPR1;ITPR1;ITPR1;EGOT                  | 0.0050758   | 0.321726493 |
| cg11715789 | RUFY1;RUFY1;RUFY1                       | 0.000148457 | 0.321724901 |

|            |                                                 |             |             |
|------------|-------------------------------------------------|-------------|-------------|
| cg17071063 | TRPC4;TRPC4;TRPC4;TRPC4;TRPC4;TRPC4             | 1.96E-05    | 0.321722156 |
| cg14775296 | MEIS1                                           | 5.59E-05    | 0.32171952  |
| cg11288641 | FAM3B;FAM3B                                     | 0.001147425 | 0.321719375 |
| cg05065572 | TBX5;TBX5;TBX5;TBX5                             | 5.11E-05    | 0.321714214 |
| cg11251858 | ESR1;ESR1;ESR1;ESR1;ESR1                        | 0.00043997  | 0.321711859 |
| cg11275630 | SLC8A2                                          | 0.000187194 | 0.3216965   |
| cg10477905 |                                                 | 0.003189589 | 0.321690744 |
| cg14862395 | CDH22                                           | 8.60E-06    | 0.321687105 |
| cg16235748 | ZC3H12D                                         | 0.000187194 | 0.321683873 |
| cg08203352 |                                                 | 7.23E-05    | 0.321681101 |
| cg03955483 | LYPD5                                           | 0.000290372 | 0.32166797  |
| cg06664085 | ARMC4;ARMC4                                     | 0.001147425 | 0.321661512 |
| cg16544169 | NKX2-6                                          | 4.34E-05    | 0.321661382 |
| cg26504021 | IRX2;IRX2;C5orf38                               | 0.004357816 | 0.321653307 |
| cg21975834 |                                                 | 1.50E-05    | 0.321650557 |
| cg02177231 | TBX15                                           | 0.000791389 | 0.321647977 |
| cg12479507 |                                                 | 0.000955793 | 0.321646817 |
| cg13253980 | RBP4                                            | 0.000290372 | 0.321632917 |
| cg25561913 | ZNF503;C10orf41                                 | 0.000290372 | 0.321626447 |
| cg04844267 |                                                 | 8.60E-06    | 0.321621197 |
| cg10574494 | SPATA18                                         | 0.00043997  | 0.321620945 |
| cg05258261 | SPSB4                                           | 0.000117986 | 0.321594903 |
| cg10152131 |                                                 | 0.000955793 | 0.321585043 |
| cg13890379 | DOK6                                            | 5.59E-05    | 0.321577535 |
| cg05263113 |                                                 | 0.000187194 | 0.321564077 |
| cg24647724 | DNAH9                                           | 1.50E-05    | 0.321524183 |
| cg24698655 |                                                 | 7.23E-05    | 0.321522188 |
| cg23657179 | C10orf41;C10orf41                               | 9.24E-05    | 0.321517822 |
| cg05355225 | CA3                                             | 3.34E-05    | 0.321512219 |
| cg22579028 | MIAT                                            | 1.96E-05    | 0.321504593 |
| cg07877145 |                                                 | 4.34E-05    | 0.321500185 |
| cg09674215 | TWIST1                                          | 1.11E-05    | 0.321490222 |
| cg12627844 | VPS54;VPS54                                     | 0.00043997  | 0.321490061 |
| cg25584930 | AP3B2                                           | 7.23E-05    | 0.321469678 |
| cg26841967 |                                                 | 4.34E-05    | 0.32146706  |
| cg16589135 |                                                 | 0.000290372 | 0.32146673  |
| cg01891818 | ICT1                                            | 1.96E-05    | 0.321465091 |
| cg11054816 | BACE1;BACE1;BACE1;BACE1                         | 0.002714607 | 0.321421932 |
| cg07883600 | CACNA1D;CACNA1D;CACNA1D                         | 0.001948248 | 0.321419908 |
| cg19645221 |                                                 | 0.000187194 | 0.321412568 |
| cg08239804 | SGK1;SGK1;SGK1                                  | 0.000117986 | 0.32139685  |
| cg10644361 | MIPOL1;MIPOL1                                   | 1.11E-05    | 0.321395041 |
| cg03979241 | EPB49;EPB49;EPB49;EPB49;EPB49;EPB49;EPB49;EPB49 | 0.000148457 | 0.321393759 |
| cg04991805 | CRTAC1                                          | 0.000117986 | 0.321390055 |
| cg05073035 | ZIC1;ZIC1                                       | 0.000148457 | 0.321385544 |
| cg00123055 | SOX17                                           | 0.000357885 | 0.321351161 |
| cg07613945 | PCDHGA4;PCDHGA6;PCDHGA9;PCDHGA1;PCDHGA1         | 0.00043997  | 0.321351095 |
| cg05654711 | DDAH1;DDAH1;DDAH1                               | 4.34E-05    | 0.321325806 |
| cg00545804 | TSHZ3                                           | 0.001061731 | 0.321323613 |
| cg22231902 | EN1;EN1                                         | 7.23E-05    | 0.321311812 |
| cg16516691 | ZSWIM2                                          | 0.000187194 | 0.321310136 |
| cg11754206 | KCNB2                                           | 1.96E-05    | 0.32130422  |
| cg16800708 | DLK1                                            | 9.24E-05    | 0.321300161 |
| cg02110182 | SIX1                                            | 7.23E-05    | 0.321278468 |
| cg16643151 | GRID1                                           | 0.000187194 | 0.321276181 |
| cg02723856 |                                                 | 4.34E-05    | 0.321274862 |
| cg24580066 | OVOL2                                           | 0.001376172 | 0.321273902 |
| cg17487784 | CSGALNACT1;CSGALNACT1;CSGALNACT1                | 0.000654035 | 0.321266106 |
| cg04392469 | MOSC2                                           | 0.001376172 | 0.321253289 |
| cg04095732 |                                                 | 8.60E-06    | 0.321247907 |

|            |                                         |             |             |
|------------|-----------------------------------------|-------------|-------------|
| cg08195279 | NELL2;NELL2;NELL2;NELL2;NELL2           | 0.000262362 | 0.321247068 |
| cg17163760 | CPVL;CPVL                               | 0.000791389 | 0.321237518 |
| cg24410546 | PNMA2                                   | 0.003734675 | 0.321234307 |
| cg19495308 | TRIM10;TRIM10                           | 0.007873393 | 0.321232901 |
| cg09038794 | MOCS1;MOCS1                             | 0.000187194 | 0.32122916  |
| cg23681017 | MFSD7                                   | 1.96E-05    | 0.321208965 |
| cg02718825 |                                         | 8.60E-06    | 0.321205968 |
| cg08248297 | AP1M1;AP1M1                             | 7.23E-05    | 0.321192274 |
| cg17239558 | PRDM16;PRDM16                           | 0.000396647 | 0.321185925 |
| cg03321003 | EPHA3;EPHA3                             | 0.003734675 | 0.321185755 |
| cg18646851 |                                         | 0.000537905 | 0.321168405 |
| cg15887459 | LOC494141;LOC494141;LOC494141           | 9.24E-05    | 0.321168207 |
| cg23664459 | INSM2                                   | 0.000117986 | 0.321148989 |
| cg13416310 | GULP1                                   | 8.60E-06    | 0.321116329 |
| cg05332960 | C18orf34;C18orf34                       | 0.000187194 | 0.321109499 |
| cg15056556 | RAB32                                   | 0.000233422 | 0.321108137 |
| cg26492514 | SLIT3                                   | 1.96E-05    | 0.321091984 |
| cg07254032 | HCN1                                    | 1.11E-05    | 0.321082427 |
| cg22706610 | PDE4D;PDE4D                             | 0.000290372 | 0.321082377 |
| cg11501236 | LOC134466                               | 3.34E-05    | 0.321057747 |
| cg20809087 | BRUNOL6;BRUNOL6                         | 0.000955793 | 0.321053952 |
| cg16368763 |                                         | 1.50E-05    | 0.321053625 |
| cg25457832 | EFCAB1;EFCAB1;EFCAB1                    | 7.23E-05    | 0.321043025 |
| cg18565355 | ESRP1;ESRP1;ESRP1;ESRP1;ESRP1           | 7.23E-05    | 0.321030566 |
| cg10124710 |                                         | 0.000187194 | 0.32101679  |
| cg16530429 | LIN28                                   | 9.24E-05    | 0.321014603 |
| cg15988350 | PDE1C                                   | 0.000654035 | 0.321012789 |
| cg04871778 | TTC22;TTC22                             | 0.000187194 | 0.321007632 |
| cg24903144 | PAX2;PAX2;PAX2;PAX2;PAX2                | 2.58E-05    | 0.321000753 |
| cg14049990 | LPCAT1                                  | 0.000537905 | 0.32098408  |
| cg04423976 | PARM1                                   | 7.23E-05    | 0.320965819 |
| cg22374861 | PTPRO;PTPRO                             | 0.000654035 | 0.320958168 |
| cg23089840 | LRRC3                                   | 0.000233422 | 0.320950952 |
| cg09253581 | LYPD5;LYPD5                             | 0.000117986 | 0.320941916 |
| cg20364632 |                                         | 0.004357816 | 0.320936662 |
| cg23818870 | C1orf114                                | 0.000148457 | 0.320934584 |
| cg10638780 | ZNF560                                  | 1.50E-05    | 0.320915469 |
| cg06391199 | PTH2R;PTH2R                             | 2.58E-05    | 0.320913375 |
| cg18892446 | ENC1                                    | 0.000955793 | 0.320897379 |
| cg04991036 | C14orf23;C14orf23                       | 8.60E-06    | 0.32088633  |
| cg20648847 | ACTN3                                   | 0.00043997  | 0.320871472 |
| cg12286573 | C17orf104                               | 1.11E-05    | 0.320855178 |
| cg27449864 | STX1A;STX1A;STX1A;STX1A                 | 0.000117986 | 0.320846622 |
| cg14042504 | FOXA2;FOXA2                             | 0.000233422 | 0.320844515 |
| cg11685510 |                                         | 0.00043997  | 0.320839153 |
| cg17215863 | RALYL;RALYL;RALYL;RALYL                 | 4.34E-05    | 0.320838569 |
| cg13008174 | NEIL2;NEIL2;NEIL2;NEIL2                 | 0.000187194 | 0.320828315 |
| cg16921083 | SOX14                                   | 4.34E-05    | 0.320816018 |
| cg27569863 |                                         | 5.59E-05    | 0.320798761 |
| cg01796166 |                                         | 0.000654035 | 0.32079736  |
| cg18164784 | PCDHGA4;PCDHGA6;PCDHGA1;PCDHGA5;PCDHGA5 | 0.009066563 | 0.320796619 |
| cg16586442 | GALNT11                                 | 5.59E-05    | 0.32079457  |
| cg05636681 | TBC1D12                                 | 0.000357885 | 0.320785952 |
| cg06821199 | CPLX1                                   | 0.001195582 | 0.320782362 |
| cg15536490 | TFAP2C                                  | 0.000117986 | 0.320782095 |
| cg00384701 |                                         | 0.000654035 | 0.320774316 |
| cg26802830 | MUC12                                   | 2.08E-05    | 0.320765326 |
| cg24051481 | SOX21                                   | 3.34E-05    | 0.320752937 |
| cg10511904 | FGF12;FGF12                             | 2.58E-05    | 0.320752463 |
| cg18074184 | SLC10A4                                 | 8.60E-06    | 0.320750683 |

|            |                               |             |             |
|------------|-------------------------------|-------------|-------------|
| cg09381701 | SASH1;SASH1                   | 2.58E-05    | 0.320746049 |
| cg03301582 | PON3                          | 0.000148457 | 0.320732585 |
| cg15399466 |                               | 9.04E-05    | 0.320719903 |
| cg12309653 | LOC145845                     | 1.50E-05    | 0.320701032 |
| cg23042796 | FLJ40330                      | 0.000537905 | 0.320677476 |
| cg17334018 | UNC5C                         | 0.000290372 | 0.320676572 |
| cg08245702 | VAX2                          | 0.000955793 | 0.320674616 |
| cg06817917 | BMPR1A                        | 0.000654035 | 0.32065865  |
| cg24438644 | ADRB3;ADRB3                   | 1.11E-05    | 0.320642875 |
| cg02008651 | C14orf23;C14orf23             | 5.59E-05    | 0.320637132 |
| cg23202979 | CADM1;CADM1                   | 4.34E-05    | 0.320625955 |
| cg02783918 | FOXF1                         | 0.000233422 | 0.320625409 |
| cg26311610 | EIF4H;EIF4H                   | 0.000654035 | 0.320608935 |
| cg14308082 |                               | 0.000955793 | 0.320608725 |
| cg13642537 |                               | 9.24E-05    | 0.32060531  |
| cg01383911 | TRIM39;TRIM39                 | 5.59E-05    | 0.320600806 |
| cg08404028 | CHP2;CHP2                     | 0.002304201 | 0.320579368 |
| cg04971534 | SEZ6;SEZ6                     | 1.11E-05    | 0.320574258 |
| cg13869872 | HECW2                         | 9.24E-05    | 0.320546842 |
| cg11796455 |                               | 9.24E-05    | 0.320516921 |
| cg02778237 |                               | 4.34E-05    | 0.320505641 |
| cg23166773 | SDCCAG8;AKT3                  | 0.000148457 | 0.32049646  |
| cg01246835 |                               | 4.34E-05    | 0.320488879 |
| cg05395302 | VSTM2B                        | 3.34E-05    | 0.320483342 |
| cg00196671 | DSC2;DSC2;DSC2;DSC2           | 0.003734675 | 0.320467504 |
| cg21782409 | UNC5C                         | 0.000955793 | 0.320464145 |
| cg17692125 | BARX2                         | 0.004357816 | 0.320463791 |
| cg19357416 | LAPTM4B                       | 3.34E-05    | 0.320461908 |
| cg06893379 |                               | 3.34E-05    | 0.320456182 |
| cg21082557 | SCTR                          | 0.000290372 | 0.320454923 |
| cg06497668 |                               | 0.000955793 | 0.32044641  |
| cg09353063 | OXTR;OXTR                     | 4.34E-05    | 0.320440681 |
| cg03126821 | C8orf47;C8orf47               | 5.59E-05    | 0.320438223 |
| cg18206952 | DZIP1;DZIP1                   | 9.24E-05    | 0.320433461 |
| cg00446046 |                               | 0.007873393 | 0.320429674 |
| cg05140069 | PDPN;PDPN;PDPN;PDPN           | 7.23E-05    | 0.32041309  |
| cg02861380 | LHX8                          | 0.000148457 | 0.320407499 |
| cg11649795 | C11orf87                      | 4.34E-05    | 0.320407062 |
| cg05892030 |                               | 0.000290372 | 0.320404859 |
| cg15662768 | HRH3                          | 0.001147425 | 0.320401821 |
| cg13816321 |                               | 0.000654035 | 0.320385215 |
| cg04281019 |                               | 0.000233422 | 0.320384575 |
| cg26445561 | SLC36A4                       | 7.23E-05    | 0.32037534  |
| cg16570133 |                               | 0.001147425 | 0.320371771 |
| cg27416489 | KIF5C                         | 0.004357816 | 0.320363418 |
| cg26529044 | C13orf30                      | 7.23E-05    | 0.320347362 |
| cg07363137 |                               | 0.000110797 | 0.320314274 |
| cg18425434 | C10orf82                      | 0.000117986 | 0.32030282  |
| cg09648702 |                               | 0.000233422 | 0.320290481 |
| cg24221541 | PNMAL1;PNMAL1;PNMAL1;PNMAL1   | 0.007873393 | 0.320250763 |
| cg01172965 | KCNK13                        | 0.000148457 | 0.320250088 |
| cg07372602 | PDK4;PDK4                     | 0.003734675 | 0.320243673 |
| cg08857144 | ADD2;ADD2;ADD2;ADD2;ADD2      | 0.004357816 | 0.320235209 |
| cg18784558 |                               | 0.000148457 | 0.320234149 |
| cg15830864 | RNF220                        | 2.58E-05    | 0.320215984 |
| cg22235417 | ZNF214;NLRP14                 | 0.000233422 | 0.320210038 |
| cg24002887 |                               | 0.002714607 | 0.320199946 |
| cg13969001 | PAX7;PAX7;PAX7;PAX7;PAX7;PAX7 | 0.001948248 | 0.320199575 |
| cg20312026 | NPY1R                         | 1.50E-05    | 0.320196288 |
| cg13885201 | ZNF23                         | 0.000187194 | 0.320188458 |

|            |                                 |             |             |
|------------|---------------------------------|-------------|-------------|
| cg01820539 | SPHKAP;SPHKAP                   | 1.96E-05    | 0.320186655 |
| cg15964611 | OPCML                           | 0.001147425 | 0.320159224 |
| cg09868780 | LVRN                            | 0.000148457 | 0.320157651 |
| cg27030482 |                                 | 0.000290372 | 0.320155892 |
| cg07919443 |                                 | 0.000357885 | 0.320154076 |
| cg18579879 | WNT16;WNT16                     | 1.50E-05    | 0.320151059 |
| cg13078563 | GABRB3;GABRB3                   | 5.59E-05    | 0.32014919  |
| cg11554335 | UBE2L6                          | 0.000148457 | 0.32014535  |
| cg16015423 | SYDE1                           | 0.002450672 | 0.320131301 |
| cg24347663 | ADD2;ADD2;ADD2;ADD2;ADD2        | 0.003734675 | 0.320121539 |
| cg25800638 | ITSN2;ITSN2;ITSN2               | 1.96E-05    | 0.320118097 |
| cg07957995 |                                 | 2.58E-05    | 0.320100667 |
| cg10997627 | TAC1;TAC1;TAC1;TAC1             | 3.34E-05    | 0.320095353 |
| cg18181196 | ESRRG                           | 4.34E-05    | 0.320094396 |
| cg19358307 |                                 | 3.34E-05    | 0.32009404  |
| cg14627743 | FEZF1;FEZF1                     | 1.96E-05    | 0.320086965 |
| cg00336164 | CCDC108;CCDC108                 | 4.34E-05    | 0.320074651 |
| cg09628838 | C17orf102;TMEM132E              | 0.000357885 | 0.320062308 |
| cg16315058 | TBX5;TBX5;TBX5;TBX5             | 3.34E-05    | 0.320043146 |
| cg14397318 |                                 | 2.58E-05    | 0.320040202 |
| cg05351257 | CCKBR                           | 0.000654035 | 0.320039873 |
| cg00546491 | PDE1C                           | 3.34E-05    | 0.320029398 |
| cg13810562 | MGC2889;HRASLS                  | 7.23E-05    | 0.320029091 |
| cg03348461 | CAMTA1                          | 0.000233422 | 0.320014697 |
| cg14662355 | LMX1A;LMX1A                     | 0.000117986 | 0.319991309 |
| cg01225004 |                                 | 0.00043997  | 0.319987809 |
| cg00758296 | PHF21B;PHF21B                   | 7.23E-05    | 0.319987426 |
| cg14681055 | PITX3                           | 0.00043997  | 0.319986402 |
| cg22528044 | SCN9A                           | 0.004878663 | 0.319984434 |
| cg21985590 | RIPPLY2                         | 8.60E-06    | 0.319974785 |
| cg10290504 |                                 | 0.001376172 | 0.319973363 |
| cg12927498 | FCHSD1                          | 0.00156564  | 0.319963118 |
| cg00765830 |                                 | 2.58E-05    | 0.319926086 |
| cg11002986 |                                 | 7.23E-05    | 0.319913943 |
| cg05210412 | CA4;CA4                         | 0.000148457 | 0.319902458 |
| cg00397635 | ZYG11A                          | 0.000233422 | 0.319883128 |
| cg02841912 | SYNE1;SYNE1                     | 0.000955793 | 0.319880529 |
| cg15174564 | GRIK4                           | 0.000537905 | 0.319877814 |
| cg04711162 | VSTM2B                          | 0.001147425 | 0.319876183 |
| cg18443378 | WDR17;WDR17                     | 7.23E-05    | 0.319835633 |
| cg04474085 |                                 | 4.34E-05    | 0.319833494 |
| cg22526139 | RHCG                            | 0.000117986 | 0.319830915 |
| cg11277662 | TSNARE1                         | 0.000290372 | 0.319830047 |
| cg25856090 | CLCN1                           | 9.24E-05    | 0.319823458 |
| cg12668309 | CACNA1D;CACNA1D;CACNA1D         | 0.001639597 | 0.319817748 |
| cg05301866 | TBR1                            | 0.000290372 | 0.31981223  |
| cg06528306 | NPBWR1                          | 0.000537905 | 0.319810994 |
| cg23998119 | ZDHHC22                         | 0.002714607 | 0.319799663 |
| cg05392364 | DNAJA4;DNAJA4                   | 0.005897668 | 0.319792356 |
| cg26334507 | ZBTB17                          | 4.34E-05    | 0.319776537 |
| cg12645220 | PAK7;PAK7                       | 1.11E-05    | 0.319769062 |
| cg26948907 | FOXC2;FOXC2                     | 3.34E-05    | 0.319759916 |
| cg18191162 | KIF6                            | 0.00043997  | 0.319755055 |
| cg10850791 | PABPC4L                         | 4.34E-05    | 0.319750874 |
| cg10363975 | GPR126;GPR126;GPR126;GPR126     | 0.000290372 | 0.319745362 |
| cg04575395 | CRMP1                           | 0.000187194 | 0.319737515 |
| cg22883472 | EBF2                            | 2.58E-05    | 0.319732873 |
| cg17241776 | DLEU7                           | 0.002927025 | 0.319732338 |
| cg10135640 | FAM176A;FAM176A                 | 0.009066563 | 0.319718345 |
| cg07103493 | SLC27A6;SLC27A6;SLC27A6;SLC27A6 | 9.24E-05    | 0.319714793 |



|            |                                      |             |             |
|------------|--------------------------------------|-------------|-------------|
| cg22910449 | SYT9                                 | 1.50E-05    | 0.319705228 |
| cg00475820 |                                      | 8.60E-06    | 0.31970022  |
| cg21127068 | ZIC4;ZIC4                            | 7.23E-05    | 0.319693862 |
| cg17679453 | WNT5A                                | 3.34E-05    | 0.319687438 |
| cg18335796 | CALB1                                | 5.59E-05    | 0.319682442 |
| cg14807248 | EPB41L4A;FLJ11235                    | 0.000290372 | 0.319675494 |
| cg12681948 |                                      | 7.23E-05    | 0.319656571 |
| cg18482164 | NEUROD2;NEUROD2                      | 0.000117986 | 0.319655968 |
| cg01056135 | SERPINB13                            | 0.002714607 | 0.319650757 |
| cg18867004 |                                      | 9.24E-05    | 0.319644642 |
| cg20575761 | OTX2                                 | 3.34E-05    | 0.31964158  |
| cg02307823 | PTEN                                 | 0.001948248 | 0.319636955 |
| cg11752275 | GNLY;GNLY                            | 0.000148457 | 0.319603073 |
| cg05100070 | SIM1                                 | 7.23E-05    | 0.319599197 |
| cg16708451 |                                      | 2.58E-05    | 0.319592355 |
| cg09528265 | PPP2R2B;PPP2R2B;PPP2R2B;PPP2R2B;PPP2 | 0.00043997  | 0.319589043 |
| cg19094243 | TMEFF2                               | 8.60E-06    | 0.319578911 |
| cg06264984 | CYP1B1                               | 0.000187194 | 0.319572698 |
| cg20157281 | PCSK2                                | 0.000233422 | 0.319570408 |
| cg19165854 | KIAA1024                             | 0.00043997  | 0.319551421 |
| cg13080379 | TBX15                                | 9.24E-05    | 0.319547421 |
| cg26537209 |                                      | 0.001376172 | 0.319542958 |
| cg02987482 | MLLT1                                | 0.000187194 | 0.319540532 |
| cg18396987 | SYCP1                                | 0.000537905 | 0.319509364 |
| cg20740903 | TK1                                  | 0.000117986 | 0.319492851 |
| cg20031656 | FEZ1;FEZ1                            | 0.000654035 | 0.3194909   |
| cg14017655 | EYA4;EYA4;EYA4                       | 0.003734675 | 0.319489694 |
| cg04878701 |                                      | 1.50E-05    | 0.319447754 |
| cg22278296 | RPRM;RPRM                            | 0.000148457 | 0.319426654 |
| cg20601919 | CYP27A1;CYP27A1                      | 0.000791389 | 0.319414939 |
| cg12718440 | MORN4;MORN4                          | 2.58E-05    | 0.319410893 |
| cg01618130 | HS3ST6                               | 9.24E-05    | 0.319405713 |
| cg16959758 |                                      | 0.000117986 | 0.319397846 |
| cg13907959 | HIST3H2BB;HIST3H2A;HIST3H2A          | 7.23E-05    | 0.319396865 |
| cg10501976 |                                      | 0.001147425 | 0.319393875 |
| cg03062454 | RNF160                               | 5.59E-05    | 0.319390744 |
| cg10647465 | KIRREL3;KIRREL3                      | 0.000955793 | 0.319389451 |
| cg04095339 | IRX4                                 | 8.60E-06    | 0.319376623 |
| cg19170807 |                                      | 5.59E-05    | 0.319372427 |
| cg18627360 | MIR124-3                             | 0.004357816 | 0.319368928 |
| cg13890451 |                                      | 0.000187194 | 0.319365874 |
| cg23641852 | TSHZ3                                | 0.00043997  | 0.319346495 |
| cg22147084 | GFPT2                                | 0.00043997  | 0.319346115 |
| cg25364343 | CABYR;CABYR;CABYR;CABYR;CABYR;CABY   | 0.004357816 | 0.31934417  |
| cg22667178 | SERP2                                | 1.11E-05    | 0.31934314  |
| cg18693412 | TOX2                                 | 0.000187194 | 0.319341689 |
| cg26306909 | C4orf19                              | 0.000262362 | 0.319335738 |
| cg08130988 | EFEMP1;EFEMP1;EFEMP1;EFEMP1;EFEMP1   | 1.50E-05    | 0.319332421 |
| cg13304825 | TMEM105                              | 0.000290372 | 0.319319677 |
| cg06615678 | LHX8                                 | 1.50E-05    | 0.319314526 |
| cg07379434 | VWC2                                 | 0.000357885 | 0.319309329 |
| cg17307558 | DKK2                                 | 5.59E-05    | 0.319308888 |
| cg11228876 | NID1                                 | 0.000537905 | 0.319301833 |
| cg25787499 | TMEM151A                             | 2.58E-05    | 0.31929689  |
| cg26196480 | TBX5;TBX5                            | 1.96E-05    | 0.319292975 |
| cg00629427 |                                      | 7.23E-05    | 0.319288036 |
| cg17109042 | ANKS1B;ANKS1B;ANKS1B                 | 2.58E-05    | 0.31928661  |
| cg13782301 | PRRT1                                | 5.59E-05    | 0.319280892 |
| cg17982102 | RAB31                                | 5.59E-05    | 0.31926488  |
| cg07477009 | UGGT2                                | 1.50E-05    | 0.319264292 |

|            |                                    |             |             |
|------------|------------------------------------|-------------|-------------|
| cg16789104 | SKAP1;SKAP1                        | 0.000357885 | 0.319254133 |
| cg07341624 | TMC2                               | 1.96E-05    | 0.319250943 |
| cg14738170 | PCDHGA4;PCDHGA2;PCDHGB2;PCDHGA5;PC | 0.000290372 | 0.319248726 |
| cg06886153 |                                    | 0.000117986 | 0.319240344 |
| cg26538140 |                                    | 0.001948248 | 0.319237236 |
| cg02471897 |                                    | 0.000290372 | 0.319235874 |
| cg22759823 |                                    | 0.000570759 | 0.319231238 |
| cg27294678 | TMEM45B                            | 0.000290372 | 0.319194953 |
| cg06219660 | NADK                               | 1.50E-05    | 0.319164365 |
| cg24887140 | PTGS2                              | 7.23E-05    | 0.319158479 |
| cg14081924 | PAQR9                              | 7.23E-05    | 0.31915716  |
| cg03780545 | LRR67                              | 0.000357885 | 0.31915003  |
| cg00833352 | NEBL                               | 0.000187194 | 0.319141679 |
| cg14633398 |                                    | 0.000791389 | 0.319128641 |
| cg24882551 |                                    | 1.11E-05    | 0.319119287 |
| cg16232504 | SNX7;SNX7                          | 0.000290372 | 0.319111964 |
| cg12920180 | COCH;COCH                          | 0.000233422 | 0.319072578 |
| cg26056703 |                                    | 8.60E-06    | 0.319072091 |
| cg01468621 | BRSK2                              | 5.59E-05    | 0.319056542 |
| cg25774643 | SCT                                | 0.003189589 | 0.319051343 |
| cg18930354 | ZIC4;ZIC4;ZIC4;ZIC4;ZIC4           | 8.60E-06    | 0.319029631 |
| cg17466795 | C20orf103                          | 5.59E-05    | 0.319008065 |
| cg09680447 |                                    | 1.50E-05    | 0.319003125 |
| cg00172812 |                                    | 0.000187194 | 0.318997723 |
| cg26416887 | CUX2                               | 0.001147425 | 0.318992709 |
| cg27119456 | LOC441666                          | 0.000290372 | 0.318984632 |
| cg25396728 | IQSEC3;IQSEC3                      | 0.000791389 | 0.318982936 |
| cg18481230 | KCNJ3                              | 8.60E-06    | 0.318981743 |
| cg17964432 | WWC2;C4orf38                       | 0.002304201 | 0.318975078 |
| cg11165905 | ATP8A2                             | 0.002304201 | 0.318951689 |
| cg01791587 | SLC6A17                            | 3.34E-05    | 0.318944167 |
| cg06943667 | DKK3;DKK3;DKK3                     | 0.002304201 | 0.318931535 |
| cg26118906 |                                    | 1.11E-05    | 0.318927461 |
| cg01716975 |                                    | 0.000148457 | 0.318909952 |
| cg11742688 | ABCB10                             | 0.000791389 | 0.318900631 |
| cg16027761 | PCDH8;PCDH8                        | 0.000537905 | 0.318893486 |
| cg12189835 | SYT7                               | 0.000290372 | 0.318883915 |
| cg24594454 |                                    | 0.000654035 | 0.318882588 |
| cg04071270 |                                    | 1.11E-05    | 0.318875503 |
| cg11377047 | MIR1976;RPS6KA1;RPS6KA1            | 0.001376172 | 0.318868483 |
| cg02699218 | ANKRD43                            | 4.34E-05    | 0.318866547 |
| cg21561970 | ISM1                               | 0.000187194 | 0.318861511 |
| cg04219099 | MANEAL;MANEAL;MANEAL               | 0.000357885 | 0.31884704  |
| cg17082803 | VAX2                               | 0.000955793 | 0.318846502 |
| cg06151243 |                                    | 1.50E-05    | 0.318830755 |
| cg11412466 |                                    | 0.000955793 | 0.318824855 |
| cg09461185 | PTGS2                              | 7.23E-05    | 0.318819291 |
| cg10634551 | KCNMB2;KCNMB2                      | 0.005897668 | 0.318817409 |
| cg13548361 | PSD;FBXL15                         | 1.96E-05    | 0.31881591  |
| cg07989851 |                                    | 0.000365373 | 0.318809819 |
| cg03171795 |                                    | 0.000187194 | 0.318803412 |
| cg26870584 | COL12A1;COL12A1                    | 5.59E-05    | 0.318800117 |
| cg15914828 |                                    | 7.23E-05    | 0.318789552 |
| cg24347994 |                                    | 0.000233422 | 0.318783196 |
| cg15196197 | TNXB                               | 0.001948248 | 0.318775818 |
| cg26485937 | PCDHGA4;PCDHGA9;PCDHGA1;PCDHGB1;PC | 4.34E-05    | 0.318771937 |
| cg18064025 | EYA1                               | 0.000357885 | 0.318759276 |
| cg26123605 |                                    | 5.59E-05    | 0.31873068  |
| cg26332310 | BARHL2                             | 0.000117986 | 0.318722559 |
| cg19414591 |                                    | 9.24E-05    | 0.318722494 |

|            |                                      |             |             |
|------------|--------------------------------------|-------------|-------------|
| cg20217257 | CCDC88B                              | 2.58E-05    | 0.318714906 |
| cg05655837 | T                                    | 4.34E-05    | 0.318710649 |
| cg08015447 | A2BP1;A2BP1                          | 7.23E-05    | 0.318702718 |
| cg00249621 | TSPYL5                               | 0.002304201 | 0.318690241 |
| cg20930114 | SEPT10;SEPT10;ANKRD57                | 8.60E-06    | 0.318681147 |
| cg11816600 | KIF21A                               | 0.001639597 | 0.318680393 |
| cg23511285 | GLTSCR1                              | 3.34E-05    | 0.318671446 |
| cg19273773 | NAPEPLD;NAPEPLD                      | 0.005897668 | 0.318655086 |
| cg05341815 |                                      | 0.000357885 | 0.318645525 |
| cg11831043 | CREB5                                | 0.004357816 | 0.318638932 |
| cg23260190 | ENTPD7;ENTPD7                        | 0.000233422 | 0.318626919 |
| cg16778107 | AXIN1;AXIN1                          | 0.000357885 | 0.318624385 |
| cg09601912 |                                      | 4.34E-05    | 0.318609475 |
| cg15962861 |                                      | 4.34E-05    | 0.318604313 |
| cg02520104 | NDFIP2;NDFIP2                        | 0.000148457 | 0.318601408 |
| cg24318763 | CLEC2L                               | 0.000290372 | 0.318594173 |
| cg14797198 | PHF21B;PHF21B                        | 8.60E-06    | 0.318587531 |
| cg27295373 | SLC30A10                             | 0.000290372 | 0.318582231 |
| cg10679156 |                                      | 0.000654035 | 0.31857751  |
| cg08919494 | CA8                                  | 0.000955793 | 0.318572534 |
| cg26590537 | KCNA1                                | 4.34E-05    | 0.318569119 |
| cg24990317 | NCOR2;NCOR2                          | 9.24E-05    | 0.318568545 |
| cg05186666 | FLJ44817                             | 0.000357885 | 0.318564183 |
| cg03679521 | NEUROD2;NEUROD2                      | 5.59E-05    | 0.31854371  |
| cg02543772 | TMEM132C                             | 7.23E-05    | 0.318539507 |
| cg08141165 | DAB1                                 | 2.58E-05    | 0.318539194 |
| cg07903918 | GABBR2                               | 4.34E-05    | 0.318537104 |
| cg04902302 |                                      | 0.002304201 | 0.318525768 |
| cg09601175 |                                      | 1.96E-05    | 0.318525242 |
| cg20499290 |                                      | 7.23E-05    | 0.318512896 |
| cg06526620 | FUT4                                 | 9.24E-05    | 0.31848891  |
| cg08974450 | ATP2C2;ATP2C2                        | 0.001376172 | 0.318487967 |
| cg14065115 |                                      | 0.000791389 | 0.318484685 |
| cg07511564 | NXPH1                                | 0.000791389 | 0.3184835   |
| cg10476773 |                                      | 0.001376172 | 0.318478548 |
| cg04608900 | VAX2                                 | 0.000791389 | 0.318476039 |
| cg19542238 | SEMA3E;SEMA3E                        | 0.000233422 | 0.318457137 |
| cg18468219 | MARVELD3;MARVELD3                    | 1.11E-05    | 0.318455904 |
| cg01511828 | CCBE1                                | 0.000357885 | 0.318452896 |
| cg06630799 | TFAP2C                               | 5.59E-05    | 0.318451464 |
| cg25387636 | SLC47A1                              | 7.23E-05    | 0.318446189 |
| cg16426459 | MLPH;MLPH                            | 8.60E-06    | 0.318443113 |
| cg11624233 | SIGIRR;SIGIRR                        | 5.59E-05    | 0.318428148 |
| cg03408135 | CR1L                                 | 0.000537905 | 0.318419625 |
| cg18298920 |                                      | 0.002304201 | 0.318417832 |
| cg09638668 | RFX4                                 | 0.000357885 | 0.318408039 |
| cg20004910 | CYP1A1                               | 0.000233422 | 0.318406796 |
| cg19223782 | RNH1;RNH1;RNH1;RNH1;RNH1;RNH1;RNH1;R | 4.34E-05    | 0.318398863 |
| cg18649319 |                                      | 0.000357885 | 0.318388518 |
| cg25273602 | YTHDF2                               | 0.001147425 | 0.318383653 |
| cg27007937 | PCDHB3                               | 5.59E-05    | 0.318382481 |
| cg23232188 | EIF2                                 | 0.000117986 | 0.318357985 |
| cg03717315 | SEMA4F                               | 0.000537905 | 0.318354564 |
| cg12844784 | FREM2                                | 3.34E-05    | 0.318349326 |
| cg27256528 | A2BP1;A2BP1                          | 1.96E-05    | 0.318348502 |
| cg02154345 |                                      | 3.34E-05    | 0.318331526 |
| cg25697556 | WASF3                                | 5.59E-05    | 0.318324887 |
| cg26482052 |                                      | 2.58E-05    | 0.318322958 |
| cg15618978 | TRIM59                               | 0.001376172 | 0.318321084 |
| cg08592707 | PPM1E                                | 1.96E-05    | 0.318320803 |

|            |                                 |             |             |
|------------|---------------------------------|-------------|-------------|
| cg14431361 |                                 | 0.000233422 | 0.318320007 |
| cg02640041 | RXFP3;RXFP3                     | 0.000117986 | 0.318317499 |
| cg05317275 | COL5A3                          | 0.000791389 | 0.318315122 |
| cg15731815 | RNF207                          | 0.000654035 | 0.318303439 |
| cg03943839 | TMC7;TMC7                       | 0.000117986 | 0.318299167 |
| cg08881796 | VPS53;VPS53                     | 5.59E-05    | 0.318296807 |
| cg04692403 | TCF21;TCF21                     | 4.34E-05    | 0.318296337 |
| cg00532449 |                                 | 0.000537905 | 0.318294138 |
| cg02772430 | SLITRK1                         | 3.34E-05    | 0.318288935 |
| cg02370605 | CDH7;CDH7                       | 1.50E-05    | 0.318266063 |
| cg26669793 | PRRX1;PRRX1                     | 0.002304201 | 0.31825704  |
| cg18774195 | SLC7A14;SLC7A14                 | 2.58E-05    | 0.318240999 |
| cg10074775 | ZFH4;LOC100192378               | 1.96E-05    | 0.318229319 |
| cg04704053 |                                 | 0.000290372 | 0.318224763 |
| cg01269718 |                                 | 0.00043997  | 0.318222006 |
| cg14458619 | PTPRD;PTPRD                     | 0.002714607 | 0.318220211 |
| cg06912966 |                                 | 0.001147425 | 0.31821149  |
| cg01143309 | FADS6                           | 0.001147425 | 0.318207285 |
| cg15254559 |                                 | 0.000148457 | 0.318186926 |
| cg27061249 | PHACTR2;PHACTR2;PHACTR2;PHACTR2 | 9.24E-05    | 0.318185004 |
| cg08602500 | PTPRN2;PTPRN2;PTPRN2            | 7.23E-05    | 0.318176266 |
| cg05264870 | NRP2;NRP2;NRP2;NRP2;NRP2;NRP2   | 0.000955793 | 0.318172389 |
| cg21702506 | SLC6A15;SLC6A15;SLC6A15         | 1.50E-05    | 0.318168686 |
| cg01426713 |                                 | 7.23E-05    | 0.318161926 |
| cg14576825 |                                 | 0.001376172 | 0.318161619 |
| cg26290543 |                                 | 0.000117986 | 0.318157489 |
| cg11222948 | FAM83H                          | 3.34E-05    | 0.318155531 |
| cg23529896 |                                 | 0.000290372 | 0.318149452 |
| cg13846270 | DLEU7                           | 0.001376172 | 0.318147108 |
| cg08887694 | IL17RB;CHDH;CHDH                | 0.000233422 | 0.318114622 |
| cg01727145 | SPEG                            | 0.002304201 | 0.318110978 |
| cg05921905 | HOXA2                           | 5.59E-05    | 0.318108905 |
| cg26630735 | CCDC68                          | 0.000233422 | 0.318100231 |
| cg12018969 |                                 | 7.23E-05    | 0.318100216 |
| cg13806741 | FAM181B;FAM181B                 | 1.50E-05    | 0.318098831 |
| cg00852924 | TOR3A                           | 0.000290372 | 0.318084123 |
| cg24351167 | PHACTR1                         | 1.96E-05    | 0.318082106 |
| cg16358679 | DNAJA4;DNAJA4                   | 0.0050758   | 0.318081647 |
| cg09668400 | SHISA2                          | 4.34E-05    | 0.318045528 |
| cg23586322 | COL14A1                         | 0.000262362 | 0.318034113 |
| cg13342435 | MPPED2                          | 0.003189589 | 0.31801652  |
| cg27512205 | KITLG;KITLG                     | 1.11E-05    | 0.318012718 |
| cg21318213 | NR2F2;NR2F2;NR2F2;MIR1469;NR2F2 | 9.24E-05    | 0.318011266 |
| cg20353489 |                                 | 1.50E-05    | 0.318000717 |
| cg09772121 | CADPS2;CADPS2;CADPS2            | 0.000148457 | 0.317999827 |
| cg10824063 | NELL1;NELL1                     | 0.001147425 | 0.317996113 |
| cg25442600 |                                 | 0.005897668 | 0.317995888 |
| cg11678896 |                                 | 0.000233422 | 0.317994404 |
| cg10329173 | PCDH7;PCDH7;PCDH7               | 8.60E-06    | 0.31799369  |
| cg17460447 | EVC;EVC                         | 0.002714607 | 0.31798227  |
| cg15384598 | JPH4;JPH4                       | 0.000233422 | 0.317970502 |
| cg17530231 |                                 | 0.000148457 | 0.317940507 |
| cg03286235 | TACR1;TACR1                     | 0.0050758   | 0.317913422 |
| cg25618271 |                                 | 0.000357885 | 0.31791195  |
| cg14171414 | PCDH8;PCDH8                     | 2.58E-05    | 0.317893762 |
| cg18285309 | HPCAL4                          | 0.00043997  | 0.317887715 |
| cg25965774 | CTBP2;CTBP2                     | 0.000290372 | 0.317877635 |
| cg22082462 | CPNE6                           | 0.000117986 | 0.317869873 |
| cg08939373 | C11orf41                        | 0.000537905 | 0.317865562 |
| cg27344859 |                                 | 0.005897668 | 0.317864857 |

|            |                                                   |             |             |
|------------|---------------------------------------------------|-------------|-------------|
| cg27492749 | SGCE;SGCE;PEG10;SGCE;PEG10                        | 7.23E-05    | 0.317860072 |
| cg09710586 | PPP2R2C                                           | 5.59E-05    | 0.317849195 |
| cg20357910 | PLA2R1;PLA2R1                                     | 0.000955793 | 0.317842594 |
| cg20310894 | HHIPL1;HHIPL1                                     | 0.000117986 | 0.317838238 |
| cg19477977 |                                                   | 0.000187194 | 0.317818148 |
| cg00064284 | YAP1;YAP1                                         | 0.001376172 | 0.317803936 |
| cg02756106 | NELL2;NELL2;NELL2;NELL2;NELL2                     | 0.000955793 | 0.317801031 |
| cg11264499 | MTX3;MTX3                                         | 0.009066563 | 0.317800398 |
| cg23496400 | VSNL1                                             | 2.58E-05    | 0.317794381 |
| cg26311734 |                                                   | 0.000357885 | 0.317793144 |
| cg09840840 | CACNG4                                            | 4.34E-05    | 0.317790508 |
| cg12959558 |                                                   | 2.58E-05    | 0.317790125 |
| cg22678136 | SNRPN;SNRPN;SNRPN                                 | 1.96E-05    | 0.317775801 |
| cg21667878 | INS-IGF2;IGF2AS;IGF2;IGF2;IGF2AS;IGF2             | 0.002304201 | 0.317767358 |
| cg10742917 |                                                   | 5.59E-05    | 0.317766383 |
| cg11092486 |                                                   | 0.000233422 | 0.317763066 |
| cg05281894 | PDPN;PDPN;PDPN;PDPN                               | 3.34E-05    | 0.31776152  |
| cg17451176 | PCDHGA4;PCDHGA2;PCDHGB2;PCDHGA5;PCDHGB5           | 0.000148457 | 0.317753262 |
| cg27316369 |                                                   | 4.34E-05    | 0.317749375 |
| cg02860732 | SHISA9;SHISA9                                     | 0.000654035 | 0.317728639 |
| cg03098159 |                                                   | 9.24E-05    | 0.317725098 |
| cg05184456 | SCRT1                                             | 5.59E-05    | 0.317721841 |
| cg11284797 |                                                   | 0.000148457 | 0.317720958 |
| cg13242070 |                                                   | 4.34E-05    | 0.317712141 |
| cg09698471 | HTR1A                                             | 7.23E-05    | 0.317710117 |
| cg13589463 | WDR25;WDR25                                       | 0.000233422 | 0.317709058 |
| cg26620157 | PAX9                                              | 3.34E-05    | 0.31770245  |
| cg06248560 | BRUNOL4;BRUNOL4;BRUNOL4;BRUNOL4                   | 0.000955793 | 0.317699344 |
| cg18724565 | FSCN1                                             | 8.60E-06    | 0.317697013 |
| cg22029297 | LIN28                                             | 1.11E-05    | 0.317690437 |
| cg06353425 | ROBO2                                             | 0.000148457 | 0.317652073 |
| cg26919149 |                                                   | 9.24E-05    | 0.31763415  |
| cg23695504 | C1orf229                                          | 0.000791389 | 0.317612812 |
| cg16049600 | PCDHB11                                           | 0.000290372 | 0.317612451 |
| cg03663462 |                                                   | 0.000233422 | 0.317607564 |
| cg11920122 | GNAL;GNAL;GNAL                                    | 4.34E-05    | 0.317606761 |
| cg11859607 | ADCYAP1;ADCYAP1                                   | 0.000233422 | 0.317596101 |
| cg22787719 |                                                   | 0.000357885 | 0.317589079 |
| cg10108372 |                                                   | 1.50E-05    | 0.317563084 |
| cg03351460 | GDF1;LASS1;LASS1                                  | 0.003189589 | 0.317561205 |
| cg26140688 | HUNK                                              | 0.001948248 | 0.317538407 |
| cg05719140 |                                                   | 3.34E-05    | 0.317534531 |
| cg04049253 | ZBTB16;ZBTB16                                     | 7.23E-05    | 0.31752697  |
| cg06805348 | KIAA1239                                          | 1.50E-05    | 0.317512694 |
| cg18038894 | ACSF2                                             | 0.000357885 | 0.317505023 |
| cg15591678 | ZNF365;ZNF365;ZNF365;ZNF365;ZNF365;ZNF365         | 0.000148457 | 0.317500357 |
| cg14367995 |                                                   | 0.001291055 | 0.317494709 |
| cg12627071 |                                                   | 8.60E-06    | 0.317494649 |
| cg23588217 | TBX15                                             | 0.000233422 | 0.317475345 |
| cg15699085 |                                                   | 0.000955793 | 0.317474314 |
| cg00499475 | TBX3;TBX3                                         | 3.34E-05    | 0.317442744 |
| cg24558425 | CSMD2;C1orf94                                     | 8.60E-06    | 0.317441816 |
| cg02981731 | OGDHL;OGDHL;OGDHL                                 | 1.96E-05    | 0.317425651 |
| cg11942936 |                                                   | 0.000187194 | 0.317403873 |
| cg02495823 |                                                   | 8.60E-06    | 0.317403262 |
| cg05406943 | GRIN2A;GRIN2A;GRIN2A;GRIN2A                       | 0.006823935 | 0.317401651 |
| cg20813589 | RNH1;RNH1;RNH1;RNH1;RNH1;RNH1;RNH1;RNH1;RNH1;RNH1 | 0.007873393 | 0.317401225 |
| cg14081270 |                                                   | 0.001376172 | 0.317400837 |
| cg22717227 | C10orf53;C10orf53                                 | 1.96E-05    | 0.317398967 |
| cg15672853 |                                                   | 8.60E-06    | 0.317378177 |

|            |                                     |             |             |
|------------|-------------------------------------|-------------|-------------|
| cg13629999 | UCK1;UCK1                           | 0.000187194 | 0.317360949 |
| cg24349886 | PLAC2                               | 4.34E-05    | 0.317353601 |
| cg15829642 | PCDHGA4;PCDHGA2;PCDHGA5;PCDHGB2;PC  | 2.58E-05    | 0.317347014 |
| cg15325658 | ROBO1                               | 0.000117986 | 0.317310918 |
| cg07691152 |                                     | 0.000233422 | 0.317287722 |
| cg02663821 | FAM46A                              | 5.59E-05    | 0.31728718  |
| cg21202716 | SHANK2;SHANK2                       | 9.24E-05    | 0.317269134 |
| cg03947464 | UPK3A;UPK3A                         | 0.004357816 | 0.317263778 |
| cg17242351 | ACTC1                               | 0.001639597 | 0.317259955 |
| cg20274462 |                                     | 0.000290372 | 0.317253523 |
| cg05528102 | MAP1B                               | 0.000537905 | 0.31725192  |
| cg05390694 | KIAA1024                            | 0.000158823 | 0.317251588 |
| cg01919632 | FLRT2                               | 7.23E-05    | 0.317249683 |
| cg21773142 | VSTM2A                              | 1.11E-05    | 0.317248275 |
| cg01869896 | MFSD2A;MFSD2A                       | 0.000117986 | 0.317222161 |
| cg08793792 |                                     | 3.34E-05    | 0.317220426 |
| cg16095551 |                                     | 1.96E-05    | 0.317218669 |
| cg13327545 |                                     | 1.11E-05    | 0.317211131 |
| cg23303074 | LRAT                                | 9.24E-05    | 0.317210833 |
| cg12078155 |                                     | 1.96E-05    | 0.317204688 |
| cg18003762 | SCRN1;SCRN1;SCRN1;SCRN1;SCRN1;SCRN1 | 0.003189589 | 0.317190497 |
| cg08276295 | GABRB3;GABRB3                       | 0.000357885 | 0.317181089 |
| cg20779917 |                                     | 3.34E-05    | 0.317172338 |
| cg00717482 | KCND3;KCND3                         | 0.000187194 | 0.31717059  |
| cg07406191 | ZIC4;ZIC4;ZIC4;ZIC4;ZIC4            | 7.23E-05    | 0.31716412  |
| cg00883831 |                                     | 0.002714607 | 0.317162912 |
| cg23942980 | TPBG;TPBG                           | 0.002304201 | 0.317162281 |
| cg05890377 |                                     | 0.009066563 | 0.317156513 |
| cg22666828 | BRUNOL4;BRUNOL4;BRUNOL4;BRUNOL4     | 0.000148457 | 0.317145124 |
| cg25894334 | FAM47E                              | 0.000955793 | 0.317143912 |
| cg13209481 | SFTA3                               | 0.000570759 | 0.317143521 |
| cg02627227 | AGPAT4                              | 7.23E-05    | 0.317140792 |
| cg14514032 | LBX2                                | 0.000117986 | 0.317137885 |
| cg20773479 | CEP72                               | 3.34E-05    | 0.317117828 |
| cg21727532 | CLVS2                               | 4.34E-05    | 0.31711451  |
| cg25638611 | SHANK2;SHANK2                       | 0.000955793 | 0.31710985  |
| cg11166303 | TSSC1                               | 4.34E-05    | 0.317095717 |
| cg00617305 | SHISA4;SHISA4;SHISA4                | 0.00043997  | 0.317089847 |
| cg05685587 | FOXQ1                               | 8.60E-06    | 0.317075007 |
| cg12236164 |                                     | 1.96E-05    | 0.317067797 |
| cg26309194 | TMPRSS2;TMPRSS2                     | 0.001948248 | 0.317064192 |
| cg11773720 | ADCYAP1;ADCYAP1                     | 4.34E-05    | 0.31703398  |
| cg18043828 | C9orf150                            | 0.003189589 | 0.317005281 |
| cg16002507 | KIF1A                               | 4.34E-05    | 0.317000578 |
| cg05476568 | SGEF                                | 0.000357885 | 0.316992905 |
| cg27200630 |                                     | 0.002714607 | 0.316988151 |
| cg09306675 | EYA2;EYA2                           | 7.23E-05    | 0.316982417 |
| cg16545105 | CRHBP;CRHBP                         | 7.23E-05    | 0.316967993 |
| cg23262134 | OVOL2                               | 0.000148457 | 0.316945654 |
| cg22723675 |                                     | 0.003189589 | 0.316938208 |
| cg02802029 | PLOD2;PLOD2                         | 1.11E-05    | 0.316936814 |
| cg18267506 | SPATA6                              | 0.001639597 | 0.316913932 |
| cg25714392 | C3orf59                             | 0.0050758   | 0.316908721 |
| cg14677681 | KCTD8                               | 0.000537905 | 0.316887041 |
| cg14597545 | ADPGK;ADPGK;ADPGK                   | 9.24E-05    | 0.316886631 |
| cg13640297 | WDR27                               | 7.23E-05    | 0.316874262 |
| cg06846752 | ZBTB8B                              | 1.96E-05    | 0.316872423 |
| cg04350202 | XPNPEP1;XPNPEP1;XPNPEP1             | 7.23E-05    | 0.316871649 |
| cg14192291 | BARHL1                              | 2.58E-05    | 0.316857517 |
| cg03369269 | FAM123A;FAM123A                     | 0.000187194 | 0.316852882 |

|            |                                         |             |             |
|------------|-----------------------------------------|-------------|-------------|
| cg24032249 |                                         | 9.24E-05    | 0.31684929  |
| cg09632976 |                                         | 3.34E-05    | 0.31684809  |
| cg03349184 |                                         | 7.23E-05    | 0.316838863 |
| cg26002512 | KCND2;KCND2                             | 0.000148457 | 0.316827739 |
| cg18544329 | DLX5                                    | 0.001147425 | 0.31682338  |
| cg00788461 | SPATA6;SPATA6                           | 0.003189589 | 0.316821197 |
| cg08360511 | SYT7                                    | 1.11E-05    | 0.316818505 |
| cg00441573 |                                         | 0.000955793 | 0.31681575  |
| cg17243193 |                                         | 0.000791389 | 0.316810814 |
| cg04694812 | HTR1A                                   | 1.50E-05    | 0.316778471 |
| cg17774851 | NR2F1                                   | 0.000357885 | 0.316777162 |
| cg07260592 |                                         | 1.11E-05    | 0.316735326 |
| cg16904960 |                                         | 0.000187194 | 0.316730588 |
| cg08011119 | C1QL2                                   | 2.58E-05    | 0.316717611 |
| cg18338775 |                                         | 0.000117986 | 0.316715339 |
| cg21883598 | DUOX2                                   | 0.000654035 | 0.316704037 |
| cg16458596 |                                         | 8.60E-06    | 0.316696575 |
| cg10825876 | PLA2R1;PLA2R1                           | 0.000654035 | 0.31669328  |
| cg13702996 | IQSEC3                                  | 4.34E-05    | 0.316679027 |
| cg17211404 | PLA2G7;PLA2G7;PLA2G7                    | 5.59E-05    | 0.316675246 |
| cg11907797 | PCDHGA4;PCDHGA7;PCDHGA6;PCDHGA1;PCDHGA5 | 0.000117986 | 0.316674769 |
| cg14571669 | MSRB3;MSRB3                             | 1.96E-05    | 0.316665016 |
| cg03287940 | THRB;THRB;THRB                          | 0.003189589 | 0.316662503 |
| cg26298967 |                                         | 2.58E-05    | 0.316655738 |
| cg03370752 | TMEM138;TMEM138                         | 3.34E-05    | 0.316655287 |
| cg03258472 | CRB3;CRB3                               | 2.58E-05    | 0.31665464  |
| cg06567290 | SLC37A4;SLC37A4;SLC37A4;SLC37A4;SLC37A4 | 0.001948248 | 0.316652483 |
| cg09960171 | KCNB2                                   | 0.000148457 | 0.316647476 |
| cg23602533 | TTPA                                    | 1.11E-05    | 0.316646778 |
| cg21727359 | FAM46A                                  | 0.002304201 | 0.316644897 |
| cg17086773 |                                         | 0.000117986 | 0.31664264  |
| cg01099876 | SEPT10;ANKRD57;SEPT10                   | 0.000117986 | 0.316628709 |
| cg10386016 | RELN;RELN                               | 5.59E-05    | 0.316625987 |
| cg16134686 | PCSK2                                   | 0.000187194 | 0.316625819 |
| cg00840990 |                                         | 0.002714607 | 0.316606305 |
| cg13372456 | GALNT10                                 | 0.002927025 | 0.316595895 |
| cg25060172 | CDKL2                                   | 0.000955793 | 0.316594822 |
| cg24259244 | ZIC5                                    | 1.50E-05    | 0.316583639 |
| cg14848594 | SLC30A10                                | 3.34E-05    | 0.316580573 |
| cg13398291 | SFRP1                                   | 0.000117986 | 0.316578389 |
| cg10236239 | SULT1C4;SULT1C4                         | 0.000117986 | 0.31657837  |
| cg04457196 | FIGN                                    | 0.00043997  | 0.316574574 |
| cg13891768 |                                         | 0.000290372 | 0.316573738 |
| cg25146557 | LOC200726                               | 1.11E-05    | 0.316565969 |
| cg14342707 |                                         | 5.59E-05    | 0.316555421 |
| cg17124224 | BNC1                                    | 0.000357885 | 0.316544336 |
| cg21742923 | KIF5C                                   | 0.000158823 | 0.316525875 |
| cg21439672 | C1RL;LOC283314                          | 0.002304201 | 0.316517877 |
| cg08332990 | IDUA                                    | 1.96E-05    | 0.316504407 |
| cg10297473 | SALL1;SALL1                             | 0.000357885 | 0.31650395  |
| cg26315263 | MYO1E                                   | 0.000791389 | 0.31649791  |
| cg18107425 | MESP2                                   | 1.96E-05    | 0.316495449 |
| cg20348858 | EMX2;EMX2;EMX2OS                        | 8.60E-06    | 0.316493347 |
| cg08844701 |                                         | 1.11E-05    | 0.316491592 |
| cg10885338 | C2orf40                                 | 1.96E-05    | 0.316491327 |
| cg13928709 | UNC5A                                   | 0.002304201 | 0.316481737 |
| cg15515258 |                                         | 0.000357885 | 0.316470146 |
| cg13851843 | ABCC8;ABCC8                             | 4.34E-05    | 0.316449751 |
| cg05919238 | SLC38A10;SLC38A10                       | 3.34E-05    | 0.316445099 |
| cg22540115 | CYP26B1                                 | 0.000148457 | 0.316438428 |

|            |                             |             |             |
|------------|-----------------------------|-------------|-------------|
| cg02808240 | C6orf10                     | 9.24E-05    | 0.316437659 |
| cg03843972 |                             | 2.58E-05    | 0.316427398 |
| cg02357541 |                             | 2.58E-05    | 0.316410767 |
| cg23625388 | RIN3                        | 0.002714607 | 0.316403894 |
| cg11846112 |                             | 0.000187194 | 0.316403403 |
| cg04032066 | SLC6A5                      | 2.58E-05    | 0.316402852 |
| cg04835811 |                             | 8.60E-06    | 0.316399323 |
| cg13534734 |                             | 2.58E-05    | 0.316366651 |
| cg01394819 | PODN                        | 0.000187194 | 0.316363901 |
| cg04147027 | FAM46A                      | 0.000791389 | 0.316357758 |
| cg05367661 | C7orf57;C7orf57             | 0.001147425 | 0.316334645 |
| cg02920218 | SMPDL3A                     | 2.58E-05    | 0.316333189 |
| cg06508879 | IGSF9B                      | 0.000187194 | 0.316328509 |
| cg23060047 |                             | 0.000233422 | 0.316322157 |
| cg14045872 | VWC2                        | 0.002304201 | 0.316319402 |
| cg14596967 | ZBTB16;ZBTB16               | 0.000187194 | 0.316317628 |
| cg06680243 |                             | 1.96E-05    | 0.316308887 |
| cg18153869 | MAGOH                       | 0.001147425 | 0.316308747 |
| cg00338702 | CHFR;CHFR;CHFR;CHFR;CHFR    | 0.00043997  | 0.316308218 |
| cg11178293 | FEZF2                       | 0.004357816 | 0.316286015 |
| cg18798922 | SP5                         | 0.000187194 | 0.31626942  |
| cg17883458 |                             | 0.000117986 | 0.316261702 |
| cg09407232 |                             | 2.58E-05    | 0.316249469 |
| cg01719995 | USP38                       | 9.24E-05    | 0.316237181 |
| cg18702689 | COL25A1;COL25A1             | 0.000357885 | 0.316233119 |
| cg20548888 | SFTA3                       | 0.000148457 | 0.316222587 |
| cg12189137 | FBXO21;FBXO21               | 0.000187194 | 0.3162207   |
| cg22585595 | LOC401463                   | 4.34E-05    | 0.316218363 |
| cg12418190 |                             | 1.96E-05    | 0.316214742 |
| cg20537640 |                             | 1.96E-05    | 0.316214561 |
| cg11088672 |                             | 0.000654035 | 0.316212542 |
| cg14583999 | TMEM111                     | 0.000233422 | 0.316207937 |
| cg22369787 |                             | 1.96E-05    | 0.316202454 |
| cg01451391 | HLF                         | 0.001147425 | 0.316197041 |
| cg02593884 | FLYWCH1;FLYWCH1             | 0.000187194 | 0.316193176 |
| cg17901584 | DHCR24                      | 0.000357885 | 0.316165554 |
| cg05928053 |                             | 1.96E-05    | 0.316162193 |
| cg15681626 |                             | 0.000357885 | 0.316150071 |
| cg04275490 | GSX2                        | 4.34E-05    | 0.316142876 |
| cg13561409 | PIP5K1C                     | 9.24E-05    | 0.31613143  |
| cg09557462 | ADRA1A;ADRA1A;ADRA1A;ADRA1A | 0.000233422 | 0.316124477 |
| cg06999323 | NEFL                        | 0.000955793 | 0.316111119 |
| cg13132370 |                             | 0.000791389 | 0.316095493 |
| cg18988498 | PAX6;PAX6;PAX6              | 0.000233422 | 0.316095201 |
| cg09447621 | B3GAT1;B3GAT1               | 0.006823935 | 0.316090897 |
| cg25731807 | TMEM171;TMEM171             | 8.60E-06    | 0.316087206 |
| cg18235937 | RNF207                      | 0.000537905 | 0.316075283 |
| cg01332882 | ZNFX1                       | 1.96E-05    | 0.316065633 |
| cg08939394 |                             | 0.000654035 | 0.316033252 |
| cg26365998 | CCDC60                      | 0.000187194 | 0.316007471 |
| cg19392831 | PRLHR                       | 1.11E-05    | 0.316003406 |
| cg05892674 | C11orf70;C11orf70           | 4.34E-05    | 0.315996734 |
| cg14163665 | ALK                         | 7.23E-05    | 0.315960482 |
| cg05516537 | TFDP1;TFDP1                 | 7.23E-05    | 0.315945254 |
| cg12437013 | TMCO3                       | 7.23E-05    | 0.315941046 |
| cg27341128 | DOK5                        | 0.000570759 | 0.315936088 |
| cg25565383 | RAD51AP2                    | 2.58E-05    | 0.315922825 |
| cg01874697 | SORCS3                      | 3.34E-05    | 0.315912079 |
| cg19623418 |                             | 0.000187194 | 0.315907938 |
| cg04987053 | SEC14L5                     | 0.000117986 | 0.315901314 |



|            |                                 |             |             |
|------------|---------------------------------|-------------|-------------|
| cg25574175 | NR1I2;NR1I2;NR1I2;NR1I2;NR1I2   | 5.59E-05    | 0.315894755 |
| cg05969591 | C2orf88;C2orf88;C2orf88;C2orf88 | 3.34E-05    | 0.315894136 |
| cg12918473 | WNT2;WNT2                       | 0.000233422 | 0.315891733 |
| cg26577169 | LOC441177;C6orf176;C6orf176     | 0.000117986 | 0.315888253 |
| cg00382138 | CFI;CFI                         | 0.000955793 | 0.31587074  |
| cg05406635 | CCDC85C                         | 5.59E-05    | 0.315858936 |
| cg25139649 | SKI                             | 0.002714607 | 0.315851402 |
| cg02145932 | ISM1                            | 0.000233422 | 0.315846866 |
| cg09681877 |                                 | 9.24E-05    | 0.315837401 |
| cg27076139 | ADCYAP1R1                       | 0.000117986 | 0.315808977 |
| cg02221471 |                                 | 8.60E-06    | 0.315803141 |
| cg14374829 | HUNK                            | 0.000148457 | 0.315801729 |
| cg04011995 |                                 | 9.24E-05    | 0.315796348 |
| cg23702046 | TSPAN9;TSPAN9                   | 2.58E-05    | 0.315791193 |
| cg09293603 |                                 | 3.34E-05    | 0.315767413 |
| cg11457640 |                                 | 7.23E-05    | 0.315764734 |
| cg02331561 | ABCA17P;ABCA3                   | 2.58E-05    | 0.31576023  |
| cg25930591 | DLX6AS                          | 0.000791389 | 0.315758579 |
| cg20879085 | TES                             | 0.006823935 | 0.315755309 |
| cg21796225 |                                 | 7.23E-05    | 0.315740108 |
| cg00157477 | HLA-H                           | 0.000187194 | 0.315726828 |
| cg10480584 | PRDM6                           | 3.34E-05    | 0.315719451 |
| cg00858840 | SP5                             | 5.59E-05    | 0.315712357 |
| cg11214140 | SOX17                           | 0.00043997  | 0.315709608 |
| cg02788102 | CADM1;CADM1                     | 0.000187194 | 0.315704456 |
| cg03741619 | TRPV3                           | 1.50E-05    | 0.315699611 |
| cg17775765 |                                 | 3.34E-05    | 0.315695272 |
| cg04384626 |                                 | 0.000117986 | 0.315687965 |
| cg02348449 | ZSCAN18;ZSCAN18                 | 0.000148457 | 0.315686124 |
| cg02481642 | WISP2                           | 0.009066563 | 0.31567978  |
| cg04105342 | PCDH7;PCDH7;PCDH7               | 8.60E-06    | 0.3156645   |
| cg26816688 | C7orf13;RNF32                   | 0.006823935 | 0.315658223 |
| cg00525277 | TNXB                            | 0.000537905 | 0.315644449 |
| cg08303612 | SLC22A3                         | 0.000117986 | 0.315641711 |
| cg00852622 | KCND3;KCND3;KCND3;KCND3         | 0.002714607 | 0.315634336 |
| cg21178978 | TRIM67                          | 5.59E-05    | 0.3156295   |
| cg02666610 |                                 | 0.005897668 | 0.315626991 |
| cg18500988 |                                 | 1.96E-05    | 0.315620549 |
| cg25244722 |                                 | 4.34E-05    | 0.315605775 |
| cg11362013 |                                 | 0.000290372 | 0.315604806 |
| cg09241332 | ZIC1                            | 1.50E-05    | 0.315603077 |
| cg04539203 | H2AFY2                          | 0.000654035 | 0.315603054 |
| cg05121006 |                                 | 3.34E-05    | 0.315594658 |
| cg06633438 | MLLT1                           | 0.001948248 | 0.315549521 |
| cg14375531 | C9orf170                        | 0.003189589 | 0.315537613 |
| cg04845060 |                                 | 0.000117986 | 0.315528829 |
| cg22428147 | DGKI                            | 0.000117986 | 0.315465876 |
| cg12689285 | GDAP1L1                         | 0.000148457 | 0.315435025 |
| cg06169746 |                                 | 7.23E-05    | 0.315421266 |
| cg05499367 | TMEM26                          | 5.59E-05    | 0.315404106 |
| cg11856078 |                                 | 0.004357816 | 0.315399715 |
| cg10536067 | FADS6                           | 4.34E-05    | 0.315398247 |
| cg14008883 | SLC18A3;CHAT                    | 8.60E-06    | 0.315391586 |
| cg27485921 | ATP6V1E2                        | 0.000537905 | 0.315390934 |
| cg09965733 | LRFN5                           | 4.34E-05    | 0.315370991 |
| cg23165899 | ID4                             | 0.000955793 | 0.315365077 |
| cg24786875 | ANKRD32                         | 0.000955793 | 0.315342893 |
| cg00181439 | HTR1B                           | 2.58E-05    | 0.315336544 |
| cg20804831 | NUDT16P;NUDT16P                 | 1.11E-05    | 0.315318781 |
| cg11072882 | FAM47E                          | 9.24E-05    | 0.315312477 |

|            |                                   |             |             |
|------------|-----------------------------------|-------------|-------------|
| cg17810609 |                                   | 0.001376172 | 0.315287275 |
| cg23500537 |                                   | 1.96E-05    | 0.315286434 |
| cg03440762 |                                   | 0.000791389 | 0.315276614 |
| cg26530498 | C1QL2;C1QL2                       | 9.24E-05    | 0.315272947 |
| cg03445516 |                                   | 4.34E-05    | 0.31526671  |
| cg15501219 |                                   | 0.000233422 | 0.315259002 |
| cg11971771 |                                   | 0.000233422 | 0.315251594 |
| cg08014499 | IGF2AS;INS-IGF2;IGF2;IGF2;IGF2AS  | 0.000654035 | 0.315236493 |
| cg11241627 | FERD3L                            | 1.50E-05    | 0.315231512 |
| cg24310133 | SLC37A3;SLC37A3                   | 4.34E-05    | 0.315222813 |
| cg15848986 | LOC100190940                      | 9.24E-05    | 0.31521742  |
| cg26895804 |                                   | 7.23E-05    | 0.315212236 |
| cg22886275 |                                   | 1.96E-05    | 0.315185613 |
| cg14336011 | LHX3                              | 0.000290372 | 0.315185601 |
| cg27564792 | FEZF2                             | 0.000187194 | 0.315172811 |
| cg21159128 | SSBP3;SSBP3;SSBP3                 | 0.001639597 | 0.315169783 |
| cg14148055 |                                   | 0.000187194 | 0.315167452 |
| cg24570042 | GLDN                              | 2.58E-05    | 0.315162402 |
| cg06836736 | ME1                               | 3.34E-05    | 0.315141507 |
| cg09305883 |                                   | 3.34E-05    | 0.315139317 |
| cg19723805 |                                   | 0.000955793 | 0.315130981 |
| cg24837149 | CCNL2;CCNL2;CCNL2;LOC148413;CCNL2 | 0.000791389 | 0.315128682 |
| cg06570358 | ARHGAP10                          | 0.000117986 | 0.315128474 |
| cg26115531 |                                   | 1.50E-05    | 0.31511541  |
| cg27038197 | LCA5;LCA5                         | 0.000537905 | 0.315103902 |
| cg04259977 | HCN1                              | 5.59E-05    | 0.315097734 |
| cg03352181 | HSPA12A                           | 0.000955793 | 0.315084057 |
| cg07480647 | GPR153                            | 0.001376172 | 0.315079867 |
| cg01577751 | HOXC13                            | 9.24E-05    | 0.315077205 |
| cg16276982 |                                   | 0.000654035 | 0.315076313 |
| cg05084391 | LOC283856;GNAO1;GNAO1;GNAO1;GNAO1 | 0.002714607 | 0.315075617 |
| cg16390060 | NKX2-2                            | 0.000290372 | 0.315065801 |
| cg00259404 | TRIM27                            | 0.001639597 | 0.31506266  |
| cg03415617 |                                   | 3.34E-05    | 0.315041438 |
| cg23906459 |                                   | 9.24E-05    | 0.315039622 |
| cg24669528 | C13orf36                          | 9.24E-05    | 0.315027174 |
| cg24094706 | FAM19A5;FAM19A5                   | 0.003189589 | 0.315021451 |
| cg16863829 | DUPD1                             | 9.24E-05    | 0.315010461 |
| cg27282530 | ALDH1L1                           | 9.24E-05    | 0.315004136 |
| cg13085627 | LRRK1                             | 3.34E-05    | 0.315003061 |
| cg25516803 | CCK                               | 5.59E-05    | 0.314984732 |
| cg14202146 | FBXL15                            | 0.000955793 | 0.314979867 |
| cg23952644 | WASF3                             | 0.003189589 | 0.31496244  |
| cg04742719 | SLC12A9;TRIP6                     | 0.001147425 | 0.314958803 |
| cg00129196 | WDR35;WDR35                       | 0.000148457 | 0.314958301 |
| cg00680572 | NKX2-8                            | 3.34E-05    | 0.314957442 |
| cg21349625 |                                   | 3.34E-05    | 0.314940945 |
| cg11741189 |                                   | 0.000187194 | 0.314935652 |
| cg05108031 |                                   | 0.000357885 | 0.314920999 |
| cg02379107 | KIAA1755                          | 0.000357885 | 0.314912437 |
| cg10023530 | FAM38B                            | 7.23E-05    | 0.314890722 |
| cg05211662 | ADAMTS19                          | 1.96E-05    | 0.314872824 |
| cg09837656 | PLEKHO2                           | 0.000290372 | 0.314870486 |
| cg24113409 |                                   | 0.000537905 | 0.314867261 |
| cg10588034 | ESYT3                             | 0.001291055 | 0.314866247 |
| cg15305538 |                                   | 0.000396647 | 0.314862046 |
| cg21239901 |                                   | 5.59E-05    | 0.314861694 |
| cg03746482 |                                   | 1.11E-05    | 0.314854692 |
| cg05144889 | GPR148                            | 0.000187194 | 0.314854342 |
| cg14394550 | EGR3                              | 0.006823935 | 0.31484151  |

|            |                                         |             |             |
|------------|-----------------------------------------|-------------|-------------|
| cg15034135 | ADAMTS19                                | 4.34E-05    | 0.3148334   |
| cg19985870 |                                         | 0.000233422 | 0.314828197 |
| cg27639457 | CTNND2                                  | 8.60E-06    | 0.314819399 |
| cg16922039 |                                         | 9.24E-05    | 0.314814967 |
| cg02303941 |                                         | 1.96E-05    | 0.314810456 |
| cg04552451 |                                         | 0.000791389 | 0.314808355 |
| cg12847240 |                                         | 1.11E-05    | 0.314805458 |
| cg06499368 |                                         | 0.000654035 | 0.314805286 |
| cg26931990 | IFT140                                  | 0.000654035 | 0.31479902  |
| cg02229095 | ZNF34                                   | 9.24E-05    | 0.314798843 |
| cg14859460 | GRM6                                    | 1.96E-05    | 0.314793354 |
| cg14118850 | HPCAL1;HPCAL1                           | 0.001376172 | 0.314789512 |
| cg22491058 | C4BPA                                   | 0.000654035 | 0.314786841 |
| cg24658517 |                                         | 2.58E-05    | 0.314780001 |
| cg27204739 | ANKRD5;ANKRD5;ANKRD5;ANKRD5             | 0.004357816 | 0.31477833  |
| cg18120259 | LOC100132354                            | 9.24E-05    | 0.314763243 |
| cg04223420 | PITX1                                   | 0.001376172 | 0.314755484 |
| cg04422150 |                                         | 0.000233422 | 0.31474337  |
| cg24511738 |                                         | 0.000654035 | 0.314742471 |
| cg10168722 |                                         | 4.34E-05    | 0.314738017 |
| cg23884076 | CXCL10;ART3                             | 0.000290372 | 0.314733257 |
| cg04771100 | HTRA4                                   | 0.005897668 | 0.314720197 |
| cg06861044 | UMOD;UMOD                               | 0.00043997  | 0.314702914 |
| cg07964848 | MKX                                     | 2.58E-05    | 0.314700059 |
| cg27638196 | CDK5R2;CDK5R2                           | 0.000357885 | 0.314693276 |
| cg03452895 | GCA                                     | 0.000791389 | 0.314692472 |
| cg08073591 | FAM47E                                  | 0.002040485 | 0.314690096 |
| cg14753599 | C10orf116                               | 3.34E-05    | 0.314683331 |
| cg05481929 | POLR2C                                  | 0.000187194 | 0.314670319 |
| cg02120658 | PAX3;PAX3;PAX3;PAX3;PAX3;PAX3;PAX3;PAX3 | 4.34E-05    | 0.314629138 |
| cg05890484 | BHMT                                    | 0.000654035 | 0.314613364 |
| cg14373456 | PDGFRA                                  | 0.000187194 | 0.314602341 |
| cg21505925 | DYRK1A;DYRK1A;DYRK1A;DYRK1A;DYRK1A      | 0.000791389 | 0.314589916 |
| cg25771271 |                                         | 0.000117986 | 0.314587287 |
| cg13210260 | DMRTA2                                  | 2.58E-05    | 0.314586412 |
| cg10184740 | TMEM196                                 | 1.11E-05    | 0.314584741 |
| cg10996058 | C1QL2                                   | 4.34E-05    | 0.314549729 |
| cg15408073 | RXFP3                                   | 0.000955793 | 0.314549674 |
| cg12011136 | PAPOLB;RADIL                            | 1.11E-05    | 0.314544912 |
| cg07673740 |                                         | 0.001376172 | 0.314539439 |
| cg03626734 | PRSS16                                  | 1.96E-05    | 0.314524267 |
| cg22734397 | NEUROG1                                 | 0.000233422 | 0.314515759 |
| cg00383598 | HSPBP1;HSPBP1                           | 1.96E-05    | 0.314495159 |
| cg03600687 | BOK                                     | 0.000290372 | 0.314492694 |
| cg23401251 | IFT172                                  | 1.50E-05    | 0.31448112  |
| cg05424071 | GLRA3;GLRA3;GLRA3;GLRA3                 | 7.23E-05    | 0.314463507 |
| cg27039898 |                                         | 3.34E-05    | 0.314462919 |
| cg03192020 | TDH                                     | 1.50E-05    | 0.314455439 |
| cg06861880 | CYP1B1                                  | 0.000537905 | 0.31444974  |
| cg11946503 | NEUROG1;NEUROG1                         | 0.001376172 | 0.31444127  |
| cg11187796 | ADRA2C                                  | 0.004357816 | 0.314440941 |
| cg11141380 | BSX                                     | 0.000791389 | 0.314436086 |
| cg26770475 | ZNF498                                  | 5.59E-05    | 0.31443464  |
| cg18556976 |                                         | 0.001147425 | 0.314430226 |
| cg09631043 | TACC2;TACC2                             | 1.11E-05    | 0.314422182 |
| cg07593390 | IL20RB                                  | 0.000290372 | 0.314415096 |
| cg20314038 | CSMD2                                   | 9.24E-05    | 0.314401581 |
| cg16987754 |                                         | 0.000290372 | 0.314392931 |
| cg14166009 | HKR1                                    | 0.000117986 | 0.314390293 |
| cg04121624 | RHOBTB1;RHOBTB1                         | 4.34E-05    | 0.314378099 |

|            |                            |             |             |
|------------|----------------------------|-------------|-------------|
| cg07647822 | THRB;THRB;THRB             | 0.000357885 | 0.314366005 |
| cg02017257 |                            | 8.60E-06    | 0.314343412 |
| cg03186975 |                            | 1.50E-05    | 0.314340974 |
| cg18168663 | REC8;REC8                  | 1.96E-05    | 0.314334828 |
| cg18414021 | CCDC85C                    | 0.000187194 | 0.314334691 |
| cg03877267 |                            | 5.59E-05    | 0.314319283 |
| cg26531700 |                            | 7.23E-05    | 0.314315339 |
| cg24408656 |                            | 9.24E-05    | 0.314298954 |
| cg10724086 | FOXA1                      | 0.000233422 | 0.314293471 |
| cg01285926 |                            | 2.80E-05    | 0.314267404 |
| cg05533124 | AQP4;AQP4                  | 4.34E-05    | 0.314260164 |
| cg13936863 | VAX2                       | 0.000148457 | 0.314247591 |
| cg08310116 | NEK9                       | 0.001948248 | 0.314228648 |
| cg19620724 | TFAP2B                     | 4.34E-05    | 0.314218547 |
| cg11043002 | COL23A1                    | 0.000357885 | 0.314210526 |
| cg19511045 | SPR                        | 0.000791389 | 0.314208114 |
| cg27215033 |                            | 3.34E-05    | 0.314205429 |
| cg02860602 |                            | 0.000357885 | 0.314203075 |
| cg22043588 | USH1C;USH1C                | 4.34E-05    | 0.314188001 |
| cg22669136 |                            | 8.60E-06    | 0.314179647 |
| cg03388409 | TP53BP2;TP53BP2            | 0.004357816 | 0.314172273 |
| cg07690882 |                            | 0.000187194 | 0.314166705 |
| cg18315960 |                            | 0.000537905 | 0.314147728 |
| cg00255821 | CYP4X1;CYP4X1              | 0.00043997  | 0.31413558  |
| cg09984545 | SAMD5                      | 7.23E-05    | 0.31411203  |
| cg08761102 | CYP1B1                     | 0.003189589 | 0.314097426 |
| cg23928824 | GALNTL1;GALNTL1            | 0.000526175 | 0.314084678 |
| cg21781828 | MTX3;MTX3                  | 0.006823935 | 0.314076256 |
| cg18902742 | FEZF2                      | 0.000654035 | 0.314072454 |
| cg01775260 | GABRB3;GABRB3              | 0.000187194 | 0.314052974 |
| cg19422030 | NMU                        | 1.96E-05    | 0.314032232 |
| cg19672997 | MDGA2                      | 0.005897668 | 0.314029544 |
| cg17165841 | LOC200726                  | 2.58E-05    | 0.31402525  |
| cg24126698 | RASA3                      | 0.000233422 | 0.314024533 |
| cg05355757 |                            | 0.001147425 | 0.314023229 |
| cg07397399 | MAGI1;MAGI1;MAGI1          | 1.50E-05    | 0.31401863  |
| cg23690528 | SGCE;SGCE;PEG10;SGCE;PEG10 | 0.000187194 | 0.314009616 |
| cg23429903 | EPHA3;EPHA3                | 0.000791389 | 0.314002126 |
| cg07067171 | FKBP9                      | 0.002714607 | 0.313993002 |
| cg15846434 |                            | 5.59E-05    | 0.313990831 |
| cg27136844 |                            | 0.000187194 | 0.313987701 |
| cg06705017 |                            | 0.000791389 | 0.313971163 |
| cg08863459 | CYP26B1                    | 0.000357885 | 0.313965164 |
| cg07483989 | PRSS3                      | 4.34E-05    | 0.313952907 |
| cg00870662 | PARD6G                     | 0.000955793 | 0.313946147 |
| cg25513776 | MYLK4                      | 0.00043997  | 0.313929056 |
| cg24117150 | KCNK10;KCNK10              | 0.0050758   | 0.313920982 |
| cg26394220 | MIR375;CCDC108             | 4.34E-05    | 0.313917722 |
| cg02891686 | SOD3                       | 2.58E-05    | 0.313910835 |
| cg24376434 | PRRX1;PRRX1                | 7.23E-05    | 0.313906363 |
| cg26292150 | ZDHHC19                    | 0.000791389 | 0.313905492 |
| cg22259797 | C2CD2L                     | 7.23E-05    | 0.313898952 |
| cg07657465 | ZNF208                     | 3.34E-05    | 0.313891717 |
| cg00156336 | FAM176A;FAM176A            | 0.000955793 | 0.313890168 |
| cg04780572 |                            | 0.003734675 | 0.313887003 |
| cg06459443 | TMEM132E;C17orf102         | 1.96E-05    | 0.31388522  |
| cg08671267 |                            | 4.34E-05    | 0.313879892 |
| cg17923377 | BRD1;LOC90834              | 5.59E-05    | 0.313844119 |
| cg07377178 |                            | 0.000537905 | 0.313837979 |
| cg14993283 | SIM1                       | 7.23E-05    | 0.313837913 |

|            |                                    |             |             |
|------------|------------------------------------|-------------|-------------|
| cg19295314 | GMDS                               | 0.000187194 | 0.313822066 |
| cg03681335 | SULT1C2;SULT1C2                    | 7.23E-05    | 0.313805726 |
| cg17485681 | CDH23                              | 4.34E-05    | 0.313773099 |
| cg08685096 | GRIK1;GRIK1                        | 1.96E-05    | 0.313770225 |
| cg01143068 | STARD9                             | 0.001376172 | 0.313761206 |
| cg12608145 | PCDHGA2;PCDHGA3;PCDHGA1;PCDHGA3    | 0.000357885 | 0.313755868 |
| cg11510586 |                                    | 0.009066563 | 0.313747209 |
| cg00650176 | C9orf135                           | 3.34E-05    | 0.313742958 |
| cg03478969 | ANKRD34B                           | 2.58E-05    | 0.313741275 |
| cg04094548 |                                    | 7.23E-05    | 0.313721581 |
| cg03355526 | ZNF454                             | 1.50E-05    | 0.31370941  |
| cg01755562 | CLSTN2                             | 9.24E-05    | 0.31370004  |
| cg23576807 |                                    | 8.60E-06    | 0.313697371 |
| cg01577475 | PAX8;PAX8;PAX8;PAX8;PAX8;LOC440839 | 0.00043997  | 0.313693797 |
| cg07753583 | LRR61;ACTR3C;LRR61                 | 3.34E-05    | 0.313681325 |
| cg12227907 | PRDM13                             | 8.60E-06    | 0.313680925 |
| cg11200929 | CRABP1;CRABP1                      | 0.000955793 | 0.313677997 |
| cg13109216 |                                    | 9.24E-05    | 0.313672421 |
| cg01337391 |                                    | 0.001147425 | 0.313668907 |
| cg23384093 |                                    | 2.58E-05    | 0.313663662 |
| cg24319143 | DUSP22                             | 1.96E-05    | 0.313662975 |
| cg01839657 | HOXC13                             | 1.11E-05    | 0.313646397 |
| cg11751707 | CYP1B1                             | 7.23E-05    | 0.313645688 |
| cg27379109 |                                    | 0.000187194 | 0.313641694 |
| cg04744409 |                                    | 5.59E-05    | 0.313639761 |
| cg18447876 |                                    | 4.34E-05    | 0.313628224 |
| cg02797930 | SGEF;SGEF                          | 3.34E-05    | 0.313606012 |
| cg19460836 | BAIAP2;BAIAP2;BAIAP2;BAIAP2        | 0.000955793 | 0.313601435 |
| cg18313182 | PNPLA2;PNPLA2                      | 7.23E-05    | 0.313580991 |
| cg13461118 | VAPA;VAPA                          | 0.003734675 | 0.313580617 |
| cg23374964 | VAX1;VAX1                          | 0.000233422 | 0.313580059 |
| cg26667946 | SIAH3                              | 0.005897668 | 0.31357725  |
| cg16072304 |                                    | 0.00043997  | 0.313568681 |
| cg11763094 | ADAMTSL3                           | 8.60E-06    | 0.313567656 |
| cg23023466 | KCNK1                              | 0.000233422 | 0.313565452 |
| cg07589612 | GDF6                               | 3.34E-05    | 0.313545193 |
| cg20317748 | C15orf52                           | 0.009066563 | 0.313541352 |
| cg12130328 | LPHN2                              | 0.000117986 | 0.313536092 |
| cg17131030 | TSPAN2                             | 3.34E-05    | 0.31351372  |
| cg03349922 | H2AFY2                             | 0.0050758   | 0.313488088 |
| cg20769926 |                                    | 3.34E-05    | 0.313484778 |
| cg00548098 |                                    | 2.58E-05    | 0.313479795 |
| cg18980148 | ST3GAL1;ST3GAL1                    | 0.000955793 | 0.313473007 |
| cg22571530 | NFASC;NFASC;NFASC;NFASC;NFASC      | 3.34E-05    | 0.313470579 |
| cg17039645 | C6orf10                            | 0.001948248 | 0.313468043 |
| cg20634514 | ERI3                               | 0.000117986 | 0.313461844 |
| cg06113354 |                                    | 0.000233422 | 0.313449352 |
| cg17602126 | HEYL                               | 0.004357816 | 0.313448961 |
| cg17386093 | SLIT3                              | 0.000357885 | 0.313443167 |
| cg21012455 | WDR8                               | 8.60E-06    | 0.313418951 |
| cg14669524 | SPATS1                             | 0.000537905 | 0.31341873  |
| cg18603028 | SPOCK1                             | 0.000117986 | 0.313418626 |
| cg02614660 | CDK5R2;CDK5R2                      | 7.23E-05    | 0.313408227 |
| cg17683110 |                                    | 0.000791389 | 0.313403921 |
| cg18469270 |                                    | 0.00043997  | 0.313396371 |
| cg27079680 | LOC134466                          | 8.60E-06    | 0.313387712 |
| cg00584000 | TCHH                               | 0.0050758   | 0.313386889 |
| cg06583576 |                                    | 5.59E-05    | 0.313375012 |
| cg05740567 | SNORA22;CCT6P1                     | 1.96E-05    | 0.31336859  |
| cg02488942 |                                    | 0.000117986 | 0.313367884 |

|            |                                     |             |             |
|------------|-------------------------------------|-------------|-------------|
| cg04425632 | DGKI                                | 0.00043997  | 0.313358781 |
| cg16326674 | QRFPR;QRFPR                         | 0.000290372 | 0.313352868 |
| cg26548834 | FOXK1                               | 0.003189589 | 0.313349866 |
| cg05100419 |                                     | 1.96E-05    | 0.313345035 |
| cg25637894 |                                     | 4.34E-05    | 0.313334508 |
| cg05495011 |                                     | 0.001639597 | 0.313318384 |
| cg13184736 | GNG12                               | 0.0050758   | 0.313289331 |
| cg05583681 | HSDL1;LRRC50;HSDL1                  | 7.23E-05    | 0.313287255 |
| cg03048314 | NBL1;NBL1                           | 1.50E-05    | 0.313275632 |
| cg26309457 |                                     | 1.96E-05    | 0.313270091 |
| cg02676375 | TLX3                                | 4.34E-05    | 0.313267122 |
| cg21187669 | ATPAF2                              | 0.000290372 | 0.313262958 |
| cg21401647 | HIST3H2A;HIST3H2BB                  | 1.11E-05    | 0.313260719 |
| cg09659661 | IRX6                                | 5.59E-05    | 0.313250002 |
| cg02989669 | GUCY1A2                             | 0.000357885 | 0.313246194 |
| cg04938315 | TCHH                                | 3.34E-05    | 0.313215198 |
| cg09239744 | GRIN2A;GRIN2A;GRIN2A;GRIN2A         | 0.001376172 | 0.313214941 |
| cg14522803 | PNPLA2                              | 4.34E-05    | 0.313199233 |
| cg07624600 | ART5;ART5                           | 0.000117986 | 0.313195869 |
| cg09667001 |                                     | 4.34E-05    | 0.313190136 |
| cg16691033 | PPAP2C;PPAP2C;PPAP2C                | 4.34E-05    | 0.313179822 |
| cg22944499 | LOC200726;LOC200726                 | 0.000117986 | 0.31317789  |
| cg04016086 | COBL                                | 0.000537905 | 0.31317449  |
| cg04024799 | LOC646627                           | 0.000117986 | 0.313161621 |
| cg27362525 | ZNF232                              | 0.001639597 | 0.313102418 |
| cg10823322 | CRYGD                               | 0.001639597 | 0.313094343 |
| cg23747904 | PCDP1                               | 2.58E-05    | 0.313090339 |
| cg06660332 |                                     | 2.58E-05    | 0.313073688 |
| cg05011258 | LRRC36;KCTD19                       | 0.004357816 | 0.313063987 |
| cg08883066 | SYT6                                | 4.34E-05    | 0.313061716 |
| cg07105596 | GNAS;GNAS;GNAS                      | 1.50E-05    | 0.313049706 |
| cg01436998 |                                     | 9.24E-05    | 0.313020392 |
| cg18898440 | WSCD1                               | 0.000537905 | 0.3130138   |
| cg19029904 |                                     | 0.000357885 | 0.31301123  |
| cg19572637 |                                     | 0.000187194 | 0.312998624 |
| cg07369190 | PCP4L1                              | 0.000791389 | 0.312996261 |
| cg10608596 | ZNF833                              | 0.000955793 | 0.312992917 |
| cg26644059 | CRB3;CRB3                           | 8.60E-06    | 0.312981358 |
| cg22370006 | OPRM1;OPRM1;OPRM1;OPRM1;OPRM1;OPRM1 | 2.58E-05    | 0.312955372 |
| cg12253819 | GNAL                                | 0.001147425 | 0.312953711 |
| cg09622982 | LYPD1;LYPD1                         | 4.34E-05    | 0.312948354 |
| cg04843813 | FNDC3B                              | 0.00043997  | 0.312931688 |
| cg22058708 |                                     | 0.00043997  | 0.312916545 |
| cg13223682 |                                     | 0.000117986 | 0.312901352 |
| cg20998319 |                                     | 5.59E-05    | 0.312901068 |
| cg25046074 | EFEMP1;EFEMP1;EFEMP1                | 3.34E-05    | 0.312897555 |
| cg24903183 | SNX31                               | 0.000537905 | 0.31288633  |
| cg12630714 |                                     | 4.34E-05    | 0.312885214 |
| cg04222728 | KIAA1549;KIAA1549                   | 0.000187194 | 0.312854885 |
| cg12101586 | CYP1A1                              | 4.34E-05    | 0.312852308 |
| cg07037251 | SHISA6                              | 0.000187194 | 0.312850451 |
| cg08383399 | CSMD1                               | 0.000537905 | 0.312828913 |
| cg01610857 | TFAP2B                              | 2.80E-05    | 0.312827929 |
| cg23790942 |                                     | 8.60E-06    | 0.312815175 |
| cg01485117 | TNXB                                | 0.00043997  | 0.312809778 |
| cg03537386 | COL16A1                             | 4.34E-05    | 0.31279429  |
| cg14774364 | HTR1E;HTR1E                         | 0.000654035 | 0.312779237 |
| cg03181582 | ABCC8                               | 0.003189589 | 0.312772592 |
| cg05494069 | PRKAA2                              | 1.50E-05    | 0.312764055 |
| cg11670211 | NOX4;NOX4;NOX4;NOX4                 | 1.96E-05    | 0.312762513 |

|            |                                       |             |             |
|------------|---------------------------------------|-------------|-------------|
| cg19865133 | MLF1;MLF1;MLF1                        | 0.00043997  | 0.312759813 |
| cg16005494 | WBSCR17                               | 0.000148457 | 0.312738247 |
| cg16430072 | KCNN2                                 | 0.000290372 | 0.312738127 |
| cg03098643 | FAT1                                  | 0.004357816 | 0.312729516 |
| cg22221870 | FAM3B;FAM3B;FAM3B;FAM3B               | 0.001639597 | 0.312721127 |
| cg01908395 |                                       | 7.23E-05    | 0.312720198 |
| cg25573227 |                                       | 0.001639597 | 0.312665354 |
| cg09012125 | KCNJ5                                 | 0.001948248 | 0.312665062 |
| cg27254852 | LOC100306951;INPP5K;INPP5K;INPP5K     | 0.000791389 | 0.312653745 |
| cg10635895 | CACNA1C;CACNA1C;CACNA1C;CACNA1C;CA    | 0.000148457 | 0.312653548 |
| cg06067842 | TMEM26                                | 1.11E-05    | 0.312638059 |
| cg11219917 | CPLX1                                 | 0.000791389 | 0.312636898 |
| cg20113732 | NELL1;NELL1;NELL1;NELL1               | 0.001639597 | 0.312624775 |
| cg14239346 | WDR93;PEX11A;PEX11A                   | 0.000357885 | 0.312601658 |
| cg20076442 |                                       | 0.000117986 | 0.31258348  |
| cg13124863 | SCARA5;SCARA5                         | 0.001376172 | 0.312568221 |
| cg27103296 |                                       | 5.59E-05    | 0.312559448 |
| cg18612627 |                                       | 0.000290372 | 0.312557976 |
| cg05657618 | NGEF;NGEF;NGEF                        | 0.003734675 | 0.312542972 |
| cg13364903 | SCUBE3                                | 0.000117986 | 0.312541219 |
| cg21228005 | ZNF300                                | 0.002714607 | 0.312523246 |
| cg07492240 | C4orf31                               | 1.50E-05    | 0.312516117 |
| cg26450866 | KCNA7                                 | 7.23E-05    | 0.312515101 |
| cg18734433 | ZNF775                                | 7.23E-05    | 0.312492417 |
| cg15092168 | HTR1A                                 | 7.23E-05    | 0.312473735 |
| cg16158681 | MT3                                   | 0.000117986 | 0.312465463 |
| cg10213542 | ADAMTS2;ADAMTS2                       | 0.000290372 | 0.312457803 |
| cg11699925 | KLF5                                  | 0.000187194 | 0.312446017 |
| cg12980128 | ONECUT2                               | 0.001948248 | 0.312435774 |
| cg17284779 | CHAT;SLC18A3                          | 1.96E-05    | 0.312428072 |
| cg18755296 | NPBWR1                                | 0.00043997  | 0.312409432 |
| cg00584422 | ERN2;ERN2                             | 0.000233422 | 0.312401675 |
| cg20432350 | KCND3;KCND3                           | 8.60E-06    | 0.312398569 |
| cg25007283 | ZIC4;ZIC4;ZIC4                        | 0.000357885 | 0.312390247 |
| cg18443571 | ZNF710                                | 0.000187194 | 0.312384421 |
| cg10037494 | INS-IGF2;IGF2AS;IGF2;IGF2;IGF2AS;IGF2 | 0.00043997  | 0.312374099 |
| cg27254482 | OLIG2                                 | 0.001147425 | 0.312369959 |
| cg03600318 | SFTPD                                 | 0.000290372 | 0.312368053 |
| cg20801753 |                                       | 2.58E-05    | 0.312354686 |
| cg19714132 | FOXG1                                 | 3.34E-05    | 0.312352319 |
| cg05087842 | C8orf47;C8orf47                       | 1.96E-05    | 0.312335993 |
| cg02007844 | KCNJ8                                 | 9.24E-05    | 0.312334157 |
| cg25228737 |                                       | 9.24E-05    | 0.312330403 |
| cg23357250 | DNAH9                                 | 1.50E-05    | 0.312315901 |
| cg16546442 | PITX2;PITX2;PITX2                     | 8.60E-06    | 0.312296943 |
| cg19592637 | VSX1;VSX1                             | 8.60E-06    | 0.312283487 |
| cg07709606 | RAD51AP2                              | 0.000290372 | 0.312271091 |
| cg05151185 | SLC35C1;SLC35C1;SLC35C1;SLC35C1       | 2.58E-05    | 0.312265204 |
| cg12485185 |                                       | 0.000290372 | 0.312262866 |
| cg05624445 | CHST9                                 | 7.23E-05    | 0.312249065 |
| cg00344308 |                                       | 0.006823935 | 0.312239777 |
| cg06202276 |                                       | 8.60E-06    | 0.312238863 |
| cg17231690 | KRT19                                 | 9.24E-05    | 0.312238496 |
| cg01196858 | SCRN1;SCRN1;SCRN1;SCRN1               | 9.24E-05    | 0.312229641 |
| cg24333629 | SPHKAP;SPHKAP                         | 1.11E-05    | 0.312227805 |
| cg07329251 | AMPD3;AMPD3;AMPD3                     | 0.002714607 | 0.312220583 |
| cg22134162 | THOC7                                 | 0.001639597 | 0.312216479 |
| cg02096793 | MFSD7                                 | 5.59E-05    | 0.312212387 |
| cg15000279 |                                       | 0.00043997  | 0.312210374 |
| cg09516476 | GCM2                                  | 5.59E-05    | 0.312207466 |

|            |                                    |             |             |
|------------|------------------------------------|-------------|-------------|
| cg01534871 | C1orf151                           | 1.11E-05    | 0.312197093 |
| cg25803632 | HECW1                              | 4.34E-05    | 0.312189299 |
| cg23254393 |                                    | 0.000357885 | 0.312157457 |
| cg11322252 |                                    | 7.23E-05    | 0.312133755 |
| cg08066943 |                                    | 0.000117986 | 0.312111593 |
| cg17241310 | BARHL2                             | 0.000357885 | 0.312107887 |
| cg19010054 |                                    | 0.001948248 | 0.312103551 |
| cg04138502 | ADCY5                              | 0.000357885 | 0.312102253 |
| cg20464360 | HSF5                               | 1.96E-05    | 0.312095507 |
| cg27417469 | ADAM32                             | 8.60E-06    | 0.312092159 |
| cg13067714 |                                    | 0.000117986 | 0.312089484 |
| cg26400885 | ZIC1                               | 0.000148457 | 0.312087302 |
| cg08843850 |                                    | 0.001147425 | 0.312074063 |
| cg18521914 | C10orf53;C10orf53                  | 1.11E-05    | 0.312061375 |
| cg05977669 | HOXA11AS;HOXA11                    | 0.000187194 | 0.312054563 |
| cg15603311 | CACNA2D3                           | 2.58E-05    | 0.312046062 |
| cg17781313 |                                    | 8.60E-06    | 0.312042565 |
| cg22033476 | THADA;THADA                        | 0.003734675 | 0.312033997 |
| cg16419009 | EN1                                | 0.000187194 | 0.312031856 |
| cg15804782 | ARNT2;ARNT2                        | 0.000791389 | 0.312023117 |
| cg05953100 |                                    | 1.50E-05    | 0.312008837 |
| cg18313221 | MET;MET                            | 0.001948248 | 0.311987936 |
| cg13572145 | CTNNA2;LRRTM1;CTNNA2               | 1.96E-05    | 0.311983203 |
| cg03989480 | DMRTA2                             | 2.58E-05    | 0.311982772 |
| cg27352639 | PCDHA7;PCDHA12;PCDHA6;PCDHA10;PCDH | 2.58E-05    | 0.311980225 |
| cg15732230 | KLK7;KLK7                          | 0.000148457 | 0.311976791 |
| cg07685786 | S100B                              | 0.000148457 | 0.311970109 |
| cg03550384 | NECAB1                             | 5.59E-05    | 0.311952231 |
| cg27659787 | PITX2;PITX2;PITX2                  | 7.23E-05    | 0.311949382 |
| cg06268921 |                                    | 0.000117986 | 0.311946311 |
| cg06394247 | PAX5                               | 0.000187194 | 0.311944677 |
| cg08968222 | FAM13C;FAM13C;FAM13C;FAM13C        | 0.000187194 | 0.311943989 |
| cg01082843 | UNC80;UNC80                        | 9.24E-05    | 0.311943203 |
| cg12995090 | LOC100192426;PTPRM;PTPRM           | 0.000233422 | 0.311934104 |
| cg23732483 | ARIH2                              | 0.009066563 | 0.311931606 |
| cg17567562 | SMARCC1                            | 3.34E-05    | 0.311928094 |
| cg10239163 | DNMT3A;DNMT3A;DNMT3A               | 0.001948248 | 0.311923215 |
| cg15096085 | C15orf38                           | 0.000117986 | 0.311921533 |
| cg08694544 | RTBDN;RTBDN                        | 0.000148457 | 0.31190815  |
| cg15852963 | SOX2OT                             | 1.11E-05    | 0.311878714 |
| cg15897209 |                                    | 0.001147425 | 0.311877691 |
| cg08125821 | CSMD3;CSMD3                        | 4.34E-05    | 0.311867683 |
| cg19967554 | UGGT2                              | 0.000187194 | 0.311862995 |
| cg05050944 |                                    | 5.59E-05    | 0.311858751 |
| cg16366843 |                                    | 0.001639597 | 0.311832697 |
| cg01329756 |                                    | 7.23E-05    | 0.311816593 |
| cg09994356 | GDAP1L1                            | 0.000654035 | 0.31181568  |
| cg13408430 | SV2C                               | 5.59E-05    | 0.311800205 |
| cg14939652 | NPAS3;NPAS3;NPAS3;NPAS3            | 0.000187194 | 0.311798711 |
| cg08327106 | RALYL;RALYL;RALYL                  | 1.50E-05    | 0.311781216 |
| cg02634272 |                                    | 0.002304201 | 0.311778731 |
| cg00287096 |                                    | 2.58E-05    | 0.311776501 |
| cg02147126 | AZU1                               | 0.00043997  | 0.311765719 |
| cg16553435 |                                    | 9.24E-05    | 0.311762733 |
| cg04829946 | PTF1A                              | 1.11E-05    | 0.311760547 |
| cg07566707 |                                    | 5.59E-05    | 0.311742882 |
| cg06082548 | NKX6-2                             | 8.60E-06    | 0.311730347 |
| cg06000994 | ZNF536                             | 0.000233422 | 0.311728879 |
| cg26431163 |                                    | 1.96E-05    | 0.311728863 |
| cg09816471 | SNN                                | 0.000654035 | 0.311722317 |



|            |                                        |             |             |
|------------|----------------------------------------|-------------|-------------|
| cg01852585 | NPNT                                   | 3.34E-05    | 0.31171506  |
| cg03192775 | GPR12                                  | 0.002040485 | 0.311703913 |
| cg15122993 | PCDHA7;PCDHA6;PCDHA10;PCDHA4;PCDHA     | 7.23E-05    | 0.311696277 |
| cg03459073 |                                        | 0.000117986 | 0.311691082 |
| cg18030774 | SLC46A1                                | 3.34E-05    | 0.311687076 |
| cg14282904 | KCNG1                                  | 0.000955793 | 0.311679759 |
| cg22753548 | TNNI3                                  | 0.000955793 | 0.311672633 |
| cg03152353 | NOTCH1                                 | 2.58E-05    | 0.311668529 |
| cg00508024 | CTXN2                                  | 1.11E-05    | 0.311660187 |
| cg02052265 | C1orf150                               | 0.000187194 | 0.311649791 |
| cg11847808 | EPHA8;EPHA8                            | 0.00043997  | 0.311647873 |
| cg22876092 | GRID1                                  | 0.000233422 | 0.311647061 |
| cg25664938 | CDGAP                                  | 0.000187194 | 0.311643515 |
| cg05565239 | RTN1;RTN1;RTN1                         | 8.60E-06    | 0.311629887 |
| cg04950301 | PHACTR1                                | 5.59E-05    | 0.311626434 |
| cg18641486 | SLC25A21;SLC25A21;SLC25A21;LOC10012979 | 4.34E-05    | 0.311624188 |
| cg07255674 | TRIL                                   | 0.000654035 | 0.311617945 |
| cg06400704 | FMN2                                   | 2.58E-05    | 0.311603866 |
| cg24182470 | CPNE8                                  | 0.003734675 | 0.311600074 |
| cg01576559 | FAM46A                                 | 0.000654035 | 0.311598812 |
| cg07839533 | HTR1A                                  | 0.000187194 | 0.311584372 |
| cg03390636 | ARNT2                                  | 0.001639597 | 0.311576291 |
| cg01747796 |                                        | 9.24E-05    | 0.311574533 |
| cg16134323 | PCDHB16;PCDHB16                        | 1.96E-05    | 0.311569965 |
| cg04350913 | FGF12;FGF12;FGF12                      | 5.59E-05    | 0.311560906 |
| cg04180046 | MYO1G                                  | 8.60E-06    | 0.31155731  |
| cg24795903 |                                        | 0.002714607 | 0.311542154 |
| cg02060682 |                                        | 3.34E-05    | 0.311533851 |
| cg08987251 | GOT2                                   | 0.001147425 | 0.311518522 |
| cg04939673 | C4orf38;WWC2                           | 5.59E-05    | 0.311505969 |
| cg03850057 | SPAG17                                 | 0.000357885 | 0.31150559  |
| cg10583485 | DOCK7                                  | 5.59E-05    | 0.311498632 |
| cg05940452 | FOXR1;FOXR1                            | 3.21E-05    | 0.311470958 |
| cg09227621 | WNT3A                                  | 0.000537905 | 0.311470288 |
| cg07777790 | ACTA1                                  | 9.24E-05    | 0.311441077 |
| cg14783814 | MIR137                                 | 9.24E-05    | 0.311426577 |
| cg15122171 | PRLR                                   | 0.00043997  | 0.311409301 |
| cg08091147 |                                        | 0.000148457 | 0.311404123 |
| cg16998150 | C1orf114                               | 0.00043997  | 0.311399521 |
| cg04710764 | HOXC10                                 | 0.000290372 | 0.311396818 |
| cg09601629 | CCDC105                                | 0.001376172 | 0.311379914 |
| cg23218760 | EFHA2                                  | 2.58E-05    | 0.311368811 |
| cg14830002 | OR2B11                                 | 0.003189589 | 0.311367974 |
| cg21166092 |                                        | 8.60E-06    | 0.311367553 |
| cg11119767 | ZAK;ZAK                                | 0.005897668 | 0.311362079 |
| cg00748599 | SEMA3C                                 | 2.58E-05    | 0.311357859 |
| cg20461188 |                                        | 0.0050758   | 0.311355193 |
| cg02718516 | C8orf48                                | 4.34E-05    | 0.311342859 |
| cg07409200 | C13orf30                               | 0.003189589 | 0.311336813 |
| cg17153727 | TFAP2B                                 | 1.96E-05    | 0.311313126 |
| cg27212729 | LOC440925;SP5                          | 0.000290372 | 0.311284877 |
| cg10316490 | FAM5C                                  | 0.000187194 | 0.311281724 |
| cg05033803 |                                        | 1.96E-05    | 0.311280405 |
| cg15164958 | VSTM2A                                 | 9.24E-05    | 0.311275904 |
| cg00512279 | SLC18A2                                | 0.001376172 | 0.311275672 |
| cg09975850 | CYP7B1                                 | 9.24E-05    | 0.31127067  |
| cg12771281 | SLC38A6;TRMT5                          | 0.003734675 | 0.311269845 |
| cg04221886 | ABCG5                                  | 0.000117986 | 0.311268381 |
| cg03483150 | PENK;PENK                              | 5.59E-05    | 0.311265427 |
| cg02150867 | LRFN5                                  | 0.000537905 | 0.311263404 |

|            |                                    |             |             |
|------------|------------------------------------|-------------|-------------|
| cg12749246 |                                    | 8.60E-06    | 0.311262007 |
| cg02380802 |                                    | 1.96E-05    | 0.311220536 |
| cg01470340 | C10orf105;CDH23                    | 0.000233422 | 0.311216337 |
| cg12351587 |                                    | 9.24E-05    | 0.311203781 |
| cg21211882 | EPB41L1;EPB41L1                    | 0.000357885 | 0.311196984 |
| cg00860379 |                                    | 4.34E-05    | 0.311188777 |
| cg02365780 | NPAS2                              | 0.000233422 | 0.311188668 |
| cg14938677 | ARF5                               | 0.000148457 | 0.311184122 |
| cg15518950 | TMEM171;TMEM171                    | 1.50E-05    | 0.311182748 |
| cg13423098 |                                    | 8.60E-06    | 0.311182654 |
| cg15309006 | CHP2;CHP2                          | 0.000654035 | 0.311180344 |
| cg27095527 | PPARG;PPARG;PPARG                  | 0.001948248 | 0.311156407 |
| cg20842253 | TRIM54;TRIM54                      | 0.000148457 | 0.311143336 |
| cg20294486 |                                    | 9.24E-05    | 0.311139071 |
| cg21530280 | HAND2;NBLA00301                    | 2.58E-05    | 0.311134535 |
| cg21618730 |                                    | 0.001376172 | 0.311133562 |
| cg27629977 | CTNNA2;LRRTM1;CTNNA2               | 0.000205664 | 0.311127025 |
| cg04888241 | ADRA2C                             | 7.23E-05    | 0.311123605 |
| cg27597956 | PAX6;PAX6                          | 5.59E-05    | 0.311114158 |
| cg01059398 | TNFSF10                            | 7.23E-05    | 0.311105351 |
| cg26388816 | B4GALNT3                           | 0.0050758   | 0.311100424 |
| cg27517968 |                                    | 0.000233422 | 0.311094828 |
| cg11827910 | PAX6;PAX6;PAX6                     | 0.004357816 | 0.311091881 |
| cg26343001 |                                    | 0.000148457 | 0.311087601 |
| cg03001942 |                                    | 0.001639597 | 0.311087111 |
| cg24507762 | KCNB1                              | 9.24E-05    | 0.311086579 |
| cg22387323 | CCDC149                            | 0.000357885 | 0.311072377 |
| cg20889818 |                                    | 0.000148457 | 0.311053611 |
| cg20076842 |                                    | 0.000148457 | 0.311050207 |
| cg16590189 | CPLX2;CPLX2                        | 1.50E-05    | 0.311047547 |
| cg22040202 |                                    | 8.60E-06    | 0.311038922 |
| cg06139341 |                                    | 8.60E-06    | 0.311030527 |
| cg14359824 | C9orf135                           | 0.001948248 | 0.311023215 |
| cg09401099 |                                    | 0.000654035 | 0.311014072 |
| cg26195178 |                                    | 0.000955793 | 0.311007954 |
| cg26841048 | HOXB2                              | 0.000955793 | 0.311007121 |
| cg10343447 |                                    | 0.000537905 | 0.311006018 |
| cg03166566 | RHOD                               | 0.000233422 | 0.310994391 |
| cg01460227 | CALCR;CALCR                        | 1.11E-05    | 0.310987159 |
| cg06829969 | PGD                                | 0.001639597 | 0.310984398 |
| cg11768647 |                                    | 2.58E-05    | 0.310981657 |
| cg14249520 | CPT1A;CPT1A                        | 2.58E-05    | 0.310980444 |
| cg25721451 | MEIS1;MEIS1                        | 0.000117986 | 0.310979262 |
| cg04041669 | RIC3;RIC3                          | 1.96E-05    | 0.310977124 |
| cg04561389 | FGF14                              | 0.000117986 | 0.310971496 |
| cg08971771 | DLX4;DLX4                          | 6.94E-05    | 0.310924242 |
| cg08316825 | GLRA1;GLRA1                        | 5.59E-05    | 0.310910116 |
| cg26237512 |                                    | 0.002304201 | 0.310905453 |
| cg16104915 | HOXA9                              | 0.000290372 | 0.310903951 |
| cg14481208 | RTKN                               | 0.003189589 | 0.310903284 |
| cg15129823 | GALR1                              | 0.000290372 | 0.310898526 |
| cg02229433 | MNX1;MNX1                          | 0.000357885 | 0.310895387 |
| cg13249591 | S100A10                            | 0.000233422 | 0.310888758 |
| cg01690182 | GABRB3;GABRB3;GABRB3               | 0.000187194 | 0.31088753  |
| cg05089897 | DYRK1A;DYRK1A;DYRK1A;DYRK1A;DYRK1A | 2.58E-05    | 0.310882482 |
| cg11089489 |                                    | 5.59E-05    | 0.310880979 |
| cg06006071 |                                    | 0.001376172 | 0.310870551 |
| cg18593081 |                                    | 9.24E-05    | 0.310863432 |
| cg26727768 | LOC145845                          | 8.60E-06    | 0.310858967 |
| cg15081220 | KCNG1                              | 0.001887355 | 0.310853015 |

|            |                            |             |             |
|------------|----------------------------|-------------|-------------|
| cg05417162 |                            | 0.000791389 | 0.310851093 |
| cg16312514 | SHANK2                     | 0.000233422 | 0.310850101 |
| cg27093143 | APLP1;APLP1                | 0.000791389 | 0.310845608 |
| cg16791619 |                            | 0.000791389 | 0.310838926 |
| cg00960552 | NHLH2;NHLH2                | 7.23E-05    | 0.310837342 |
| cg08309529 | MNX1;MNX1                  | 8.60E-06    | 0.310836419 |
| cg27025752 | XKR6                       | 4.34E-05    | 0.310819243 |
| cg07906855 |                            | 5.59E-05    | 0.310817611 |
| cg00546005 | KCNG1                      | 9.24E-05    | 0.310817184 |
| cg00503840 | DLX5                       | 5.59E-05    | 0.310810415 |
| cg19507527 | FGF12;FGF12                | 0.000117986 | 0.310809794 |
| cg17826168 | CRB3;CRB3                  | 7.23E-05    | 0.310807965 |
| cg08383338 | PLA2G7;PLA2G7              | 0.000187194 | 0.310793983 |
| cg02226672 | SMPD3                      | 5.59E-05    | 0.310787454 |
| cg13804058 | NGF                        | 0.000290372 | 0.31077556  |
| cg18834729 | NOS1                       | 9.24E-05    | 0.310770438 |
| cg03330485 | GFRA2;GFRA2;GFRA2          | 1.11E-05    | 0.310766303 |
| cg07466705 | SLC6A1                     | 0.000537905 | 0.310749459 |
| cg20850023 | IGFBP3;IGFBP3              | 0.000537905 | 0.310726042 |
| cg04330513 | SFTA3                      | 8.60E-06    | 0.310714593 |
| cg11982072 | GATA5                      | 0.001639597 | 0.310708756 |
| cg08505883 |                            | 0.000290372 | 0.310708026 |
| cg00663972 | SOX1                       | 0.001147425 | 0.310688935 |
| cg17210126 | ZFAT;ZFAT                  | 1.96E-05    | 0.310684416 |
| cg09570974 |                            | 7.23E-05    | 0.310683204 |
| cg01612140 |                            | 0.000148457 | 0.310656901 |
| cg17200768 |                            | 2.58E-05    | 0.310651466 |
| cg20980783 |                            | 0.000187194 | 0.310651384 |
| cg13059459 |                            | 1.50E-05    | 0.310635038 |
| cg14245102 | MEG3;MEG3;MEG3             | 0.000148457 | 0.310631446 |
| cg00699219 |                            | 1.50E-05    | 0.310627273 |
| cg03388025 | SPIRE2                     | 3.34E-05    | 0.310622087 |
| cg24875854 |                            | 0.003189589 | 0.310621768 |
| cg02584459 | SLC16A12                   | 0.006823935 | 0.310616323 |
| cg10488267 |                            | 8.60E-06    | 0.310606959 |
| cg20121142 | TWIST1                     | 0.00043997  | 0.310595504 |
| cg14012082 | EPX                        | 0.000537905 | 0.310591067 |
| cg18490616 | THNSL2                     | 8.60E-06    | 0.310585655 |
| cg24358846 |                            | 1.50E-05    | 0.310584365 |
| cg02841941 | P2RY1                      | 0.000791389 | 0.310563042 |
| cg00924143 |                            | 0.00043997  | 0.310530442 |
| cg01028849 | LOC401463                  | 7.23E-05    | 0.310518546 |
| cg10424681 | C6orf201;C6orf146;C6orf146 | 8.60E-06    | 0.310517112 |
| cg12616174 | MIR124-1;LOC157627         | 0.004357816 | 0.3105048   |
| cg14400886 | PCDH10;PCDH10              | 0.000537905 | 0.31050242  |
| cg09704159 | MYEF2                      | 0.001948248 | 0.310493266 |
| cg16911495 |                            | 0.000654035 | 0.310492333 |
| cg02228111 | GALNT9;GALNT9              | 0.000955793 | 0.31048913  |
| cg06039392 | MTNR1A                     | 9.24E-05    | 0.310477825 |
| cg23676302 |                            | 9.24E-05    | 0.310474841 |
| cg16489895 | C1orf92                    | 0.000233422 | 0.310471151 |
| cg02325324 |                            | 0.001376172 | 0.310467989 |
| cg23448139 | ZFP112;ZFP112              | 5.59E-05    | 0.310464045 |
| cg08082810 |                            | 0.000187194 | 0.310459364 |
| cg05692123 |                            | 7.23E-05    | 0.310458367 |
| cg21252523 |                            | 0.000233422 | 0.310454264 |
| cg17500686 |                            | 7.23E-05    | 0.310400249 |
| cg00931558 | ZFH4;LOC100192378          | 3.34E-05    | 0.310369413 |
| cg12341314 | ACTA1                      | 2.58E-05    | 0.310368854 |
| cg19626725 | RUFY1;RUFY1;RUFY1          | 0.000537905 | 0.310368132 |

|            |                                       |             |             |
|------------|---------------------------------------|-------------|-------------|
| cg03186486 | FAM19A4;FAM19A4                       | 0.000117986 | 0.310357962 |
| cg23500396 | TSPAN18                               | 8.60E-06    | 0.310354039 |
| cg19499754 |                                       | 0.000290372 | 0.310353572 |
| cg26780998 | PLA2G7;PLA2G7                         | 4.34E-05    | 0.310346168 |
| cg01734112 | C2orf39                               | 5.59E-05    | 0.310344598 |
| cg03262554 |                                       | 5.59E-05    | 0.310328618 |
| cg24753662 | TBX1;TBX1;TBX1                        | 0.001376172 | 0.310321182 |
| cg04737991 | CHST11                                | 0.000654035 | 0.310317295 |
| cg11321433 |                                       | 0.001639597 | 0.310306286 |
| cg02137956 |                                       | 7.23E-05    | 0.310284183 |
| cg21707187 |                                       | 0.000357885 | 0.310282762 |
| cg09012471 | ARMC8;ARMC8;ARMC8                     | 0.001639597 | 0.310278644 |
| cg05386493 | FOXL2;C3orf72;FOXL2                   | 0.000205664 | 0.310255222 |
| cg24720192 | CYP1B1                                | 0.001639597 | 0.310245652 |
| cg11600596 |                                       | 0.00043997  | 0.31023154  |
| cg20259256 | TRPC1;TRPC1                           | 0.00043997  | 0.310230752 |
| cg06196379 | TREM1                                 | 0.000290372 | 0.310219453 |
| cg26805749 |                                       | 0.000357885 | 0.310213602 |
| cg11295178 |                                       | 0.000187194 | 0.31020381  |
| cg22133562 |                                       | 2.58E-05    | 0.310202012 |
| cg22615158 | WNT5A                                 | 0.007869847 | 0.310186878 |
| cg27483342 |                                       | 1.96E-05    | 0.310181566 |
| cg01405004 | FAM19A4;FAM19A4                       | 3.34E-05    | 0.310180513 |
| cg13491462 |                                       | 8.60E-06    | 0.310178042 |
| cg05329888 | TYMP;TYMP;TYMP                        | 0.000148457 | 0.310176593 |
| cg01899797 | DAB1                                  | 4.34E-05    | 0.310169009 |
| cg12136088 | ASNS;ASNS;ASNS                        | 0.000537905 | 0.310165697 |
| cg14202850 | MAPT;MAPT;MAPT;MAPT;LOC100130148;MAPT | 0.000290372 | 0.310157535 |
| cg04062391 | ZNF560                                | 7.23E-05    | 0.310156201 |
| cg00762160 | PAX9                                  | 0.000537905 | 0.310155006 |
| cg03571927 | DPY19L2P4                             | 0.000233422 | 0.310144003 |
| cg06213060 |                                       | 0.001639597 | 0.310143948 |
| cg12156512 | FKRP;FKRP                             | 0.000148457 | 0.310135389 |
| cg04238348 | KCNK2;KCNK2;KCNK2                     | 0.000148457 | 0.310133787 |
| cg05451210 |                                       | 0.000955793 | 0.310121923 |
| cg12342334 | SFRP5                                 | 0.000117986 | 0.310119798 |
| cg18717423 |                                       | 0.000791389 | 0.310115882 |
| cg24453580 | PRPH                                  | 0.001376172 | 0.310111915 |
| cg16335643 | ANKRD46                               | 1.96E-05    | 0.310094959 |
| cg00704633 | MFAP3L                                | 0.000290372 | 0.310093615 |
| cg19974854 | POU4F3                                | 0.000187194 | 0.310091198 |
| cg20014974 |                                       | 9.24E-05    | 0.310089548 |
| cg23827572 | TBX5;TBX5                             | 0.000187194 | 0.310070478 |
| cg03303774 |                                       | 7.23E-05    | 0.310066455 |
| cg19726712 | LAPTM4B                               | 0.000148457 | 0.310061521 |
| cg01920578 | NELL2;NELL2;NELL2;NELL2;NELL2;NELL2   | 0.001147425 | 0.310046379 |
| cg25253705 | SLAIN1;SLAIN1                         | 5.59E-05    | 0.310037514 |
| cg10989897 | ELAVL4                                | 0.000148457 | 0.310027474 |
| cg10115894 | SIRPA;SIRPA;SIRPA                     | 8.60E-06    | 0.310022874 |
| cg05771369 | B4GALNT1                              | 0.000187194 | 0.310004284 |
| cg15409013 | ADAMTS16                              | 0.000290372 | 0.310003906 |
| cg14772925 | PGR                                   | 4.34E-05    | 0.309995537 |
| cg20521863 |                                       | 7.23E-05    | 0.309977668 |
| cg16548780 | KIAA0895L;EXOC3L                      | 0.005897668 | 0.309969327 |
| cg03303585 |                                       | 0.000537905 | 0.309963712 |
| cg15967709 |                                       | 5.59E-05    | 0.309930721 |
| cg09412728 | HIPK4                                 | 1.50E-05    | 0.309928273 |
| cg01933836 |                                       | 0.004357816 | 0.309918112 |
| cg07009823 | KIF6                                  | 0.001639597 | 0.309917879 |
| cg14826226 | CRABP1                                | 5.59E-05    | 0.309912596 |

|            |                          |             |             |
|------------|--------------------------|-------------|-------------|
| cg08289782 | POLR3A                   | 0.001948248 | 0.309908454 |
| cg22837726 | C19orf45                 | 0.000537905 | 0.309878262 |
| cg18117228 | DNAJC6                   | 0.000148457 | 0.309873464 |
| cg05500015 | NAALAD2;NAALAD2          | 0.002304201 | 0.309870781 |
| cg20387429 |                          | 0.00043997  | 0.309862437 |
| cg23739862 | PRMT8;PRMT8              | 7.23E-05    | 0.309828249 |
| cg02707869 |                          | 0.000187194 | 0.309827666 |
| cg26818735 | TWIST1                   | 0.006823935 | 0.309823975 |
| cg20908936 |                          | 0.000955793 | 0.309819279 |
| cg19738283 |                          | 0.001147425 | 0.309798888 |
| cg01261351 | GFRA1;GFRA1;GFRA1        | 0.0050758   | 0.309796478 |
| cg11314471 |                          | 0.000290372 | 0.309795629 |
| cg16490906 | C5orf36                  | 0.001639597 | 0.309787474 |
| cg11501438 |                          | 0.000357885 | 0.309786599 |
| cg13180315 |                          | 1.96E-05    | 0.309785137 |
| cg15996342 |                          | 0.000290372 | 0.309775128 |
| cg15697849 | DBX2                     | 8.60E-06    | 0.309770315 |
| cg26049726 | EGR4                     | 0.000290372 | 0.309757406 |
| cg03398865 | IRX4                     | 1.50E-05    | 0.309755937 |
| cg09195234 |                          | 7.23E-05    | 0.309748276 |
| cg17330672 | OSBP2                    | 0.000654035 | 0.309743768 |
| cg15144793 | SH3BP4                   | 1.96E-05    | 0.309741221 |
| cg10409302 |                          | 3.34E-05    | 0.309737377 |
| cg05928649 | CBLN2                    | 0.000187194 | 0.309733739 |
| cg17222452 | MLF1;MLF1;MLF1;MLF1;MLF1 | 0.000357885 | 0.309724747 |
| cg04927889 | FEZF2                    | 0.000187194 | 0.309724317 |
| cg22729438 |                          | 0.000233422 | 0.309723437 |
| cg24161652 | TFAP2B                   | 1.11E-05    | 0.309705922 |
| cg19925035 |                          | 2.58E-05    | 0.309700771 |
| cg06069616 | C21orf63                 | 0.000233422 | 0.309700105 |
| cg25505880 | NXF1;NXF1                | 0.001948248 | 0.309691162 |
| cg23535596 | TFAP2A;TFAP2A            | 0.000187194 | 0.309687996 |
| cg26926521 | ADRA2A;ADRA2A            | 0.000233422 | 0.309668875 |
| cg12565585 | RIMS2;RIMS2              | 0.001639597 | 0.309663366 |
| cg05707458 |                          | 0.000233422 | 0.30965913  |
| cg27444994 | CDH8                     | 0.000357885 | 0.309653365 |
| cg14733720 | LYPD5                    | 1.96E-05    | 0.309630852 |
| cg27454064 |                          | 0.000654035 | 0.309623608 |
| cg25531497 | GPR158;LOC100128811      | 4.34E-05    | 0.309623319 |
| cg07594831 | RNF19A;RNF19A            | 0.000122184 | 0.309622365 |
| cg02566775 | PLAGL1;PLAGL1            | 0.00043997  | 0.309621758 |
| cg16622920 |                          | 0.006823935 | 0.309617977 |
| cg23318812 |                          | 9.24E-05    | 0.309602043 |
| cg10480343 | FBN1                     | 0.000791389 | 0.309594818 |
| cg04144521 | MFSD6                    | 0.001639597 | 0.309589712 |
| cg17338430 |                          | 0.000148457 | 0.309555956 |
| cg18419358 |                          | 0.000290372 | 0.309547243 |
| cg25417766 |                          | 4.34E-05    | 0.309527153 |
| cg15477500 | ZDHHC3;ZDHHC3;ZDHHC3     | 0.000117986 | 0.309524056 |
| cg04180890 | STK32A;STK32A            | 0.000654035 | 0.309517605 |
| cg19279257 | SLC12A9;TRIP6            | 0.002304201 | 0.309515026 |
| cg01097180 |                          | 0.000148457 | 0.309493154 |
| cg00219816 | C8orf37                  | 9.24E-05    | 0.309449385 |
| cg13603508 | CPNE8                    | 0.009066563 | 0.30944733  |
| cg00996758 |                          | 0.000187194 | 0.309429902 |
| cg27622679 | SOX2OT                   | 7.23E-05    | 0.309429696 |
| cg19624873 | SHISA4;SHISA4;SHISA4     | 0.00043997  | 0.309427025 |
| cg10779423 | C3orf18                  | 0.002714607 | 0.309424078 |
| cg23877720 | VWC2                     | 0.00043997  | 0.309404991 |
| cg02347527 |                          | 1.11E-05    | 0.309387385 |

|            |                                          |             |             |
|------------|------------------------------------------|-------------|-------------|
| cg09134726 | PRTN3                                    | 0.000654035 | 0.309381617 |
| cg11853788 | TDRD5                                    | 7.23E-05    | 0.309378682 |
| cg09542111 | GRIK1;GRIK1;GRIK1;GRIK1                  | 1.11E-05    | 0.309360715 |
| cg08891559 |                                          | 0.001147425 | 0.309355611 |
| cg22788065 |                                          | 0.000537905 | 0.309351002 |
| cg16488737 | OPCML                                    | 0.000537905 | 0.30934412  |
| cg01541178 |                                          | 4.34E-05    | 0.309332159 |
| cg02721000 | HOXC4                                    | 0.000357885 | 0.30932806  |
| cg14458068 | PCDHGA4;PCDHGA6;PCDHGA1;PCDHGA5;PCDHGA3  | 0.000955793 | 0.309327354 |
| cg26435928 |                                          | 2.58E-05    | 0.309319247 |
| cg06151165 | VSX1;VSX1                                | 0.000187194 | 0.309314058 |
| cg11468233 | DPY19L2P2;DPY19L2P2                      | 8.60E-06    | 0.3092914   |
| cg10765471 |                                          | 4.34E-05    | 0.309289588 |
| cg24399337 | LOC84856                                 | 8.60E-06    | 0.309287828 |
| cg10249375 |                                          | 0.00043997  | 0.309287036 |
| cg10453977 | EXOC6B                                   | 1.50E-05    | 0.309255723 |
| cg27301230 | TPST1                                    | 0.000148457 | 0.309238292 |
| cg15967278 |                                          | 0.006823935 | 0.309227786 |
| cg16206138 | B4GALNT2;B4GALNT2;B4GALNT2               | 7.23E-05    | 0.309225388 |
| cg26876974 | MSC                                      | 1.96E-05    | 0.309217107 |
| cg07777008 | FIBIN;FIBIN                              | 4.34E-05    | 0.3092165   |
| cg01442799 | YAP1;YAP1                                | 0.000791389 | 0.309214756 |
| cg16145324 | MAPK14;MAPK14;MAPK14;MAPK14              | 0.000866489 | 0.309206537 |
| cg12935979 | POU4F2                                   | 3.34E-05    | 0.309203458 |
| cg18275316 |                                          | 0.001147425 | 0.309201592 |
| cg18716979 | AADAT;AADAT                              | 7.23E-05    | 0.309190425 |
| cg14661959 | TCHH                                     | 0.000537905 | 0.30918745  |
| cg00747922 | RPH3AL                                   | 0.000148457 | 0.309183406 |
| cg07073964 |                                          | 0.000148457 | 0.309171958 |
| cg27465717 | LRRC67;LRRC67                            | 0.000955793 | 0.309161669 |
| cg24842760 | EYA4;EYA4;EYA4                           | 0.000791389 | 0.309159484 |
| cg01728493 | ARHGEF10L                                | 0.000357885 | 0.309149363 |
| cg02836325 | PGS1                                     | 0.000148457 | 0.309144854 |
| cg00230700 | AGPAT9                                   | 0.00043997  | 0.309143773 |
| cg17226042 | MEAF6                                    | 0.000117986 | 0.309121901 |
| cg20260127 |                                          | 4.34E-05    | 0.309121449 |
| cg25197500 | WDR45L                                   | 0.005897668 | 0.309118785 |
| cg04947680 |                                          | 8.60E-06    | 0.30911295  |
| cg13486532 |                                          | 0.000537905 | 0.309107889 |
| cg01476003 |                                          | 1.11E-05    | 0.309104044 |
| cg11586330 | LHX5                                     | 0.000187194 | 0.309101332 |
| cg13912964 | ZNHIT1                                   | 0.000233422 | 0.309099956 |
| cg17104824 | HOXD4;MIR10B                             | 0.000537905 | 0.309091587 |
| cg09967877 | SYT12                                    | 0.001948248 | 0.309088869 |
| cg20216139 |                                          | 7.23E-05    | 0.309062042 |
| cg08719486 | DAPK1                                    | 0.003734675 | 0.309051808 |
| cg09802389 | ANXA5                                    | 0.001376172 | 0.309051086 |
| cg07478468 | MCOLN2                                   | 0.000290372 | 0.309047237 |
| cg09149149 | LOC441177;C6orf176;C6orf176              | 0.000537905 | 0.309034055 |
| cg02715546 | PYGO1                                    | 3.34E-05    | 0.309028187 |
| cg26057780 | BDNF;BDNF;BDNF;BDNF;BDNF;BDNF;BDNF;BDNF  | 0.000117986 | 0.30902716  |
| cg25307074 | ASPG                                     | 0.000117986 | 0.309016811 |
| cg22354595 | MIMT1;PEG3;PEG3;ZIM2;PEG3;PEG3;ZIM2;ZIM2 | 8.60E-06    | 0.309014492 |
| cg01068808 | GLT25D2                                  | 0.001147425 | 0.309000294 |
| cg00085438 | MBNL1;MBNL1;MBNL1;MBNL1;MBNL1;MBNL1      | 0.000187194 | 0.308994067 |
| cg23204296 | SEMA5A                                   | 0.001393182 | 0.308991524 |
| cg08606911 | LMX1A                                    | 5.59E-05    | 0.308982477 |
| cg24422027 |                                          | 3.34E-05    | 0.308979715 |
| cg04451433 |                                          | 7.23E-05    | 0.308957085 |
| cg25938646 | SLITRK1                                  | 5.59E-05    | 0.308952533 |

|            |                                                   |             |             |
|------------|---------------------------------------------------|-------------|-------------|
| cg14051264 |                                                   | 2.58E-05    | 0.308945967 |
| cg17198929 | GRID2                                             | 0.000233422 | 0.308934679 |
| cg13478928 | LHX8                                              | 7.23E-05    | 0.308931775 |
| cg02331772 | SNX7;SNX7                                         | 0.000148457 | 0.308918965 |
| cg20640281 | HLF                                               | 0.000233422 | 0.308900653 |
| cg11671598 |                                                   | 3.34E-05    | 0.30888385  |
| cg02498983 | CNR1;CNR1;CNR1;CNR1                               | 7.23E-05    | 0.308880505 |
| cg08726801 | CACNA2D4                                          | 0.000117986 | 0.308867254 |
| cg10019916 | WNT3A                                             | 5.59E-05    | 0.308867077 |
| cg17617930 | ADCYAP1R1                                         | 0.000537905 | 0.308866581 |
| cg03440757 | MOSC2                                             | 0.001376172 | 0.308860374 |
| cg04881125 | PTGS2                                             | 1.96E-05    | 0.308847486 |
| cg15175143 | NXPH2                                             | 0.000290372 | 0.308817743 |
| cg00733005 | SIX1                                              | 0.000537905 | 0.308812898 |
| cg14839404 | BMP7                                              | 0.000357885 | 0.308803643 |
| cg20034202 | B3GNT7                                            | 0.000955793 | 0.30879782  |
| cg20768043 | ISL1                                              | 0.00043997  | 0.308797476 |
| cg08933615 |                                                   | 0.000654035 | 0.308785892 |
| cg03578926 | SHANK2;SHANK2                                     | 5.59E-05    | 0.308782885 |
| cg19987665 | PAX3;PAX3;PAX3;PAX3;PAX3;PAX3;PAX3;PAX3;PAX3;PAX3 | 0.000148457 | 0.3087787   |
| cg23398076 | MEIS1                                             | 0.000537905 | 0.308777823 |
| cg06003296 | PTPRB;PTPRB                                       | 0.002714607 | 0.308764401 |
| cg27604702 | NGEF;NGEF                                         | 0.000955793 | 0.308756582 |
| cg00377074 | MGC34034;MGC34034                                 | 2.58E-05    | 0.308752298 |
| cg17074339 | GALNTL4                                           | 5.59E-05    | 0.308730917 |
| cg25506726 | RASGRF1;RASGRF1                                   | 0.000654035 | 0.308720246 |
| cg07548367 | DLX5                                              | 0.000791389 | 0.30870105  |
| cg20937139 | PDGFC                                             | 0.000791389 | 0.308684902 |
| cg10004780 | ARHGEF4;ARHGEF4                                   | 0.000357885 | 0.308678434 |
| cg22027435 |                                                   | 1.96E-05    | 0.308676911 |
| cg13892295 | ARMC4                                             | 4.34E-05    | 0.308648007 |
| cg14096353 | PAX2;PAX2;PAX2;PAX2;PAX2                          | 0.00043997  | 0.308644801 |
| cg10105681 |                                                   | 0.000955793 | 0.308631888 |
| cg20003494 | SNCA;SNCA;SNCA;SNCA                               | 0.001147425 | 0.308629937 |
| cg01277155 | SLC26A5;SLC26A5;SLC26A5;SLC26A5;SLC26A5           | 7.23E-05    | 0.308610137 |
| cg09994418 |                                                   | 5.59E-05    | 0.308604536 |
| cg06879152 | PHYHIPL;PHYHIPL                                   | 1.50E-05    | 0.308592305 |
| cg01617695 |                                                   | 1.50E-05    | 0.308587039 |
| cg13024368 | DKK3;DKK3;DKK3                                    | 7.23E-05    | 0.308569287 |
| cg10426464 | C2CD4B                                            | 0.000955793 | 0.308544229 |
| cg03350439 | TRIM67                                            | 1.11E-05    | 0.308541204 |
| cg02989521 | ELMOD1;LOC643923;ELMOD1                           | 0.001948248 | 0.308536213 |
| cg01157070 | DKFZP434H168;GNAO1;GNAO1                          | 0.00043997  | 0.308530498 |
| cg13302154 | MGP                                               | 0.000791389 | 0.308518511 |
| cg22715837 |                                                   | 0.00043997  | 0.308514288 |
| cg10172669 | BEND4;BEND4;BEND4;BEND4                           | 0.000233422 | 0.308510552 |
| cg26430305 | C4BPA                                             | 0.000654035 | 0.308509702 |
| cg19453997 | WWC2;C4orf38                                      | 3.34E-05    | 0.308503046 |
| cg20026798 | STOX2                                             | 3.34E-05    | 0.308503023 |
| cg18782991 | PCDHB3                                            | 0.000148457 | 0.308502621 |
| cg19653594 | SPTBN4;BLVRB                                      | 0.001061731 | 0.308500445 |
| cg19999645 | GJD2                                              | 4.34E-05    | 0.308490839 |
| cg26377000 | SLFN12L                                           | 0.000654035 | 0.308489176 |
| cg03503087 | GFRA1;GFRA1;GFRA1                                 | 0.000187194 | 0.308463109 |
| cg04242021 | COL14A1                                           | 0.000791389 | 0.308459045 |
| cg02503874 | FERD3L;FERD3L                                     | 1.11E-05    | 0.308454855 |
| cg02909379 |                                                   | 1.96E-05    | 0.30845042  |
| cg18829827 |                                                   | 0.000187194 | 0.308449567 |
| cg11189532 | HPCA                                              | 7.23E-05    | 0.308443113 |
| cg14918548 |                                                   | 0.000537905 | 0.308427661 |

|            |                                     |             |             |
|------------|-------------------------------------|-------------|-------------|
| cg21816292 |                                     | 7.23E-05    | 0.308416774 |
| cg00997079 | CTNNA2;LRRTM1;CTNNA2                | 4.34E-05    | 0.3083981   |
| cg23731826 |                                     | 0.000117986 | 0.30839119  |
| cg12079303 | NFIA;NFIA;NFIA;NFIA                 | 0.000791389 | 0.308386688 |
| cg23207990 | SFRP2                               | 0.001376172 | 0.308386501 |
| cg08681855 | ZNF578                              | 0.000187194 | 0.308376305 |
| cg01695643 | GSC                                 | 0.000148457 | 0.308373294 |
| cg00107772 |                                     | 1.96E-05    | 0.308363628 |
| cg03307401 | KLK13                               | 0.002450672 | 0.308332123 |
| cg14455366 | NFIB                                | 0.000791389 | 0.308319088 |
| cg06274396 | HELT                                | 0.000187194 | 0.308318101 |
| cg11781421 | HAPLN4                              | 0.000654035 | 0.308316401 |
| cg18270687 |                                     | 0.001639597 | 0.308310885 |
| cg07113230 |                                     | 0.000654035 | 0.30830585  |
| cg20611276 | EYA4;EYA4;EYA4                      | 0.000148457 | 0.308289666 |
| cg02657654 |                                     | 0.005897668 | 0.3082727   |
| cg14215702 | EN2                                 | 9.24E-05    | 0.308269464 |
| cg07214164 |                                     | 5.59E-05    | 0.308246229 |
| cg21004042 |                                     | 9.24E-05    | 0.308238303 |
| cg02849695 | CCDC19                              | 0.00169692  | 0.308235384 |
| cg08726248 | DRD4                                | 0.000233422 | 0.308232281 |
| cg26386624 | HOXC11                              | 0.000955793 | 0.308214813 |
| cg22079747 | WDR69                               | 0.000187194 | 0.308208792 |
| cg00517787 |                                     | 2.80E-05    | 0.308205268 |
| cg03004350 | PRTN3                               | 0.000290372 | 0.308188561 |
| cg08575537 | EPO                                 | 0.001948248 | 0.308155268 |
| cg23713079 |                                     | 0.000357885 | 0.308151366 |
| cg03147002 | CADM2;CADM2                         | 9.24E-05    | 0.308144558 |
| cg26647135 | PILRB;PILRB;PILRB                   | 7.23E-05    | 0.308140979 |
| cg04306507 | LGALS3                              | 2.58E-05    | 0.308122018 |
| cg07012926 | GLRA1;GLRA1                         | 3.34E-05    | 0.308102936 |
| cg23486345 | C6orf168;C6orf168                   | 0.000290372 | 0.308100874 |
| cg14500258 | PCDHB2                              | 8.60E-06    | 0.308094863 |
| cg20049415 | NKX2-4                              | 0.001376172 | 0.308094768 |
| cg10049708 | JAKMIP1;JAKMIP1                     | 1.50E-05    | 0.308079591 |
| cg21777188 | PCDHB17                             | 0.001376172 | 0.308079426 |
| cg05176991 | KCTD1;KCTD1;KCTD1                   | 0.00043997  | 0.308077827 |
| cg01016191 |                                     | 0.001147425 | 0.308073658 |
| cg17295834 |                                     | 0.000233422 | 0.308047805 |
| cg26848086 | PAX6;PAX6;PAX6                      | 0.000791389 | 0.308040739 |
| cg24066316 | PAX9                                | 0.000117986 | 0.308034452 |
| cg24351410 | DAB1;DAB1                           | 3.34E-05    | 0.308029364 |
| cg22215631 |                                     | 5.59E-05    | 0.308027161 |
| cg06734271 | NPY1R                               | 5.59E-05    | 0.308016312 |
| cg20926035 | SIX2                                | 9.24E-05    | 0.30801153  |
| cg25257903 | KIAA1755                            | 9.24E-05    | 0.308004688 |
| cg00719668 |                                     | 0.001376172 | 0.308003944 |
| cg10654496 |                                     | 1.50E-05    | 0.307997352 |
| cg26964907 | VGLL2;VGLL2                         | 8.60E-06    | 0.30798702  |
| cg19361865 | MOSC2                               | 0.000233422 | 0.30798646  |
| cg01238669 | DNAH11                              | 0.001376172 | 0.307968252 |
| cg26843324 | LHX5                                | 2.58E-05    | 0.307961569 |
| cg07135446 | DLC1;DLC1                           | 4.34E-05    | 0.307959765 |
| cg08653692 | CACNG8;CACNG8                       | 0.000233422 | 0.307950825 |
| cg04992150 | NUP210                              | 0.000117986 | 0.307942911 |
| cg22975434 | KIAA1598;KIAA1598;KIAA1598;KIAA1598 | 0.000122184 | 0.307937085 |
| cg26165081 | PSMA1                               | 7.23E-05    | 0.307926347 |
| cg10211298 | TMEM108;TMEM108                     | 0.000117986 | 0.307921961 |
| cg23290121 |                                     | 8.60E-06    | 0.307914948 |
| cg11706467 | KCNJ3                               | 7.23E-05    | 0.307901744 |



|            |                                       |              |             |
|------------|---------------------------------------|--------------|-------------|
| cg14813603 | FGF14                                 | 0.000148457  | 0.307898842 |
| cg02959108 |                                       | 0.000955793  | 0.307886654 |
| cg02927747 | PHLPP1                                | 0.001376172  | 0.307875777 |
| cg01474257 | PYY                                   | 8.60E-06     | 0.307858351 |
| cg27585074 | CSNK1G2                               | 0.000148457  | 0.307857874 |
| cg10675138 | PDE10A;PDE10A;PDE10A;PDE10A           | 0.000117986  | 0.307850413 |
| cg12575928 | GAS2                                  | 8.60E-06     | 0.307836492 |
| cg07994661 |                                       | 2.58E-05     | 0.307831911 |
| cg25649895 | TMEM92;TMEM92                         | 4.34E-05     | 0.307822689 |
| cg03399933 | TDH                                   | 1.96E-05     | 0.307817518 |
| cg25232795 | SLC36A1                               | 1.50E-05     | 0.307817386 |
| cg19586698 | OTUD6B                                | 8.60E-06     | 0.307807945 |
| cg24772240 | IGFBP3;IGFBP3                         | 4.34E-05     | 0.307806628 |
| cg22987447 | C3orf55;C3orf55;C3orf55;C3orf55       | 7.23E-05     | 0.307805455 |
| cg10689404 |                                       | 0.000357885  | 0.307803769 |
| cg04904331 | VWC2                                  | 0.001147425  | 0.307793671 |
| cg18841159 | COL9A1;COL9A1                         | 0.00043997   | 0.307782775 |
| cg02087931 | CALD1;CALD1;CALD1;CALD1;CALD1;CALD1;C | 0.0003734675 | 0.307779784 |
| cg07639520 |                                       | 4.34E-05     | 0.307779439 |
| cg04222933 | LY9                                   | 0.001639597  | 0.307764949 |
| cg14422827 | DMRT2;DMRT2;DMRT2                     | 0.001376172  | 0.30775363  |
| cg19560758 | ERRF1                                 | 1.50E-05     | 0.307739093 |
| cg27279620 | MMP2                                  | 0.000148457  | 0.307737838 |
| cg22443982 | NLRP14;ZNF214;NLRP14                  | 3.34E-05     | 0.307732725 |
| cg08799727 | SEMA3C                                | 0.000791389  | 0.307726286 |
| cg08363042 | CLIC6                                 | 8.60E-06     | 0.307710513 |
| cg02043329 | FNDC3A;FNDC3A                         | 1.96E-05     | 0.307704843 |
| cg06623560 |                                       | 0.001948248  | 0.307699037 |
| cg21074347 | FLJ46111                              | 0.000955793  | 0.307698426 |
| cg07573727 | VSX2;VSX2                             | 0.000791389  | 0.307678752 |
| cg12121660 | HOXB2                                 | 0.000233422  | 0.307677741 |
| cg18244487 | MFSD7                                 | 7.23E-05     | 0.307651341 |
| cg10453425 | JPH3;JPH3                             | 0.000117986  | 0.307650467 |
| cg14902356 | ANKRD5;ANKRD5                         | 0.003189589  | 0.307650192 |
| cg22634891 | UNC5C                                 | 0.000117986  | 0.307606424 |
| cg14217069 | ONECUT1                               | 0.000148457  | 0.307586274 |
| cg19491035 | MANSC1                                | 0.000187194  | 0.307564732 |
| cg22809683 | LAMC1                                 | 0.000148457  | 0.307563394 |
| cg14649140 | HOXA10;HOXA10                         | 0.000290372  | 0.307557174 |
| cg21317965 | TFAP2B                                | 0.000117986  | 0.307554423 |
| cg24865270 |                                       | 9.24E-05     | 0.307550834 |
| cg00273449 | C2orf65                               | 5.59E-05     | 0.307543994 |
| cg16405019 | PAX7;PAX7;PAX7                        | 4.34E-05     | 0.307520445 |
| cg22894301 |                                       | 0.000187194  | 0.307512025 |
| cg15174906 |                                       | 0.000357885  | 0.307511705 |
| cg19570640 | VSNL1                                 | 5.59E-05     | 0.307492306 |
| cg14402591 | SEMA6B                                | 0.000148457  | 0.307491498 |
| cg12874181 | LOC401463                             | 1.96E-05     | 0.307489874 |
| cg14413904 |                                       | 0.002304201  | 0.307479873 |
| cg26158897 | ONECUT1                               | 2.58E-05     | 0.30747869  |
| cg00591421 | SORCS3                                | 2.58E-05     | 0.307471835 |
| cg21800309 | C6orf168                              | 0.000117986  | 0.307467853 |
| cg22620274 | UGGT2                                 | 0.001147425  | 0.307466659 |
| cg26682270 |                                       | 8.60E-06     | 0.307465232 |
| cg15941948 | IRX2;IRX2;C5orf38;IRX2;IRX2           | 0.001376172  | 0.307461126 |
| cg27309276 | POU4F3                                | 5.59E-05     | 0.307452814 |
| cg07702750 | TRIL                                  | 0.000357885  | 0.307451204 |
| cg10765212 | COL5A2                                | 7.23E-05     | 0.307451058 |
| cg11376198 | AKR7L;AKR7L                           | 0.000117986  | 0.307438666 |
| cg04842157 | ADAMTS19                              | 1.50E-05     | 0.307423094 |

|            |                                       |             |             |
|------------|---------------------------------------|-------------|-------------|
| cg05452899 | INS-IGF2;IGF2AS;IGF2;IGF2;IGF2AS;IGF2 | 0.000233422 | 0.307414    |
| cg24671344 | PDPN;PDPN;PDPN;PDPN                   | 0.000233422 | 0.307411607 |
| cg18159860 |                                       | 0.00043997  | 0.307400427 |
| cg26279021 | TWIST1                                | 0.000187194 | 0.307395102 |
| cg05656486 | NDUFS2;NDUFS2                         | 0.000290372 | 0.307378939 |
| cg24390913 |                                       | 0.000537905 | 0.307378262 |
| cg03675047 |                                       | 2.58E-05    | 0.30735525  |
| cg08386091 | DZIP1;DZIP1;DZIP1;DZIP1               | 0.000148457 | 0.307353787 |
| cg14309283 | ZBTB22;TAPBP;TAPBP;TAPBP;ZBTB22       | 0.004357816 | 0.30734831  |
| cg11324957 |                                       | 0.000187194 | 0.307347474 |
| cg06211550 |                                       | 0.004357816 | 0.307340639 |
| cg08454053 | RTN4RL1                               | 0.002714607 | 0.307335719 |
| cg01156834 | SRCIN1                                | 0.000955793 | 0.307320057 |
| cg13286281 | SLC7A4                                | 3.34E-05    | 0.307317674 |
| cg18221429 | LRR61;ACTR3C;LRR61                    | 0.000233422 | 0.307289636 |
| cg05929019 | LAMC2;LAMC2                           | 7.23E-05    | 0.307281014 |
| cg25951210 | HOXD4                                 | 0.000148457 | 0.307263525 |
| cg13462082 | HBP1                                  | 4.34E-05    | 0.307258673 |
| cg06118384 | KIF5C                                 | 0.000148457 | 0.307254061 |
| cg01700290 |                                       | 7.23E-05    | 0.307245131 |
| cg15916646 | HOXA11AS;HOXA11                       | 1.96E-05    | 0.307233192 |
| cg11857320 |                                       | 0.000148457 | 0.307229742 |
| cg22812955 |                                       | 8.60E-06    | 0.30722288  |
| cg09032973 | PCDHA1;PCDHA1;PCDHA1                  | 8.60E-06    | 0.307189437 |
| cg12201779 | DSCAM                                 | 2.58E-05    | 0.307180533 |
| cg12816979 |                                       | 0.006823935 | 0.307173555 |
| cg18280362 | CWH43                                 | 0.00041966  | 0.307170324 |
| cg00890363 |                                       | 0.000233422 | 0.30717031  |
| cg08047907 | C1orf114                              | 0.000187194 | 0.307132848 |
| cg17245188 | KIF5C                                 | 0.00043997  | 0.307132824 |
| cg04654288 |                                       | 8.60E-06    | 0.307127712 |
| cg09310966 | TREM1                                 | 5.59E-05    | 0.307126696 |
| cg25264081 |                                       | 0.001147425 | 0.307115438 |
| cg17846334 | KCNG1                                 | 0.001147425 | 0.307113572 |
| cg09854626 | SOX8                                  | 9.24E-05    | 0.307112455 |
| cg03591753 | FKBP5                                 | 8.60E-06    | 0.307109309 |
| cg00564051 |                                       | 1.50E-05    | 0.307102895 |
| cg23595636 | MGC45800                              | 4.34E-05    | 0.307097768 |
| cg11064255 |                                       | 0.001376172 | 0.307094074 |
| cg21845953 | LOC100192378;ZFH4                     | 4.34E-05    | 0.307070822 |
| cg27507591 | TTPA                                  | 0.000187194 | 0.307049392 |
| cg26831415 | EFHA2                                 | 7.23E-05    | 0.307043584 |
| cg15553418 | C1orf144;C1orf144                     | 0.000955793 | 0.307043483 |
| cg10684547 |                                       | 0.000187194 | 0.307029429 |
| cg04723534 | C2CD2                                 | 0.000357885 | 0.307025411 |
| cg20636352 |                                       | 4.34E-05    | 0.307013499 |
| cg24267283 | SOX2OT                                | 2.58E-05    | 0.307000617 |
| cg00116946 | RPL26L1;LOC100268168;LOC100268168     | 5.59E-05    | 0.306994944 |
| cg19599611 | AQR                                   | 0.000290372 | 0.306991426 |
| cg12456681 | DPY19L2P4                             | 2.58E-05    | 0.306984677 |
| cg13991908 | FAM46A;FAM46A                         | 0.009066563 | 0.306979002 |
| cg17898823 | LGI2                                  | 0.0050758   | 0.306978761 |
| cg25600766 | ST8SIA1                               | 0.000117986 | 0.306977579 |
| cg14400354 | GALNT12                               | 0.000654035 | 0.306961141 |
| cg15524336 | RIC3;RIC3                             | 1.96E-05    | 0.306948441 |
| cg10899637 | TFCP2L1;TFCP2L1                       | 0.001376172 | 0.306934604 |
| cg09956302 | HHIPL1;HHIPL1                         | 0.000955793 | 0.306927833 |
| cg06603997 | PAQR5                                 | 0.000187194 | 0.306923651 |
| cg02495518 | NRXN1;NRXN1;NRXN1                     | 4.34E-05    | 0.306912534 |
| cg01431340 | C6orf186                              | 0.005093617 | 0.306895828 |

|            |                                    |             |             |
|------------|------------------------------------|-------------|-------------|
| cg09985260 |                                    | 3.34E-05    | 0.306886179 |
| cg00172597 | SUSD4;SUSD4                        | 0.000955793 | 0.306862967 |
| cg22670147 | DPP10                              | 0.000290372 | 0.306859571 |
| cg20895877 | PRIMA1                             | 0.00043997  | 0.306844253 |
| cg01574481 | REC8;REC8                          | 0.003734675 | 0.306827874 |
| cg12738347 |                                    | 0.000117986 | 0.30681992  |
| cg15489005 |                                    | 0.00043997  | 0.306818212 |
| cg22920665 | EDIL3                              | 0.000290372 | 0.306811076 |
| cg26294667 | FAM110B                            | 0.009066563 | 0.306798515 |
| cg23815246 | FAM46A                             | 0.000357885 | 0.306784955 |
| cg08205700 |                                    | 9.24E-05    | 0.306777421 |
| cg14936269 | HS3ST6                             | 0.000233422 | 0.306772287 |
| cg20503109 | ST6GALNAC2                         | 7.23E-05    | 0.306759642 |
| cg25234170 | FAM18B2;FAM18B2                    | 0.000791389 | 0.306726985 |
| cg25806655 | SEMA6B                             | 7.23E-05    | 0.306726562 |
| cg17345081 | NMBR                               | 1.96E-05    | 0.306725646 |
| cg26100099 | SPAG17                             | 9.24E-05    | 0.306719542 |
| cg26727435 |                                    | 0.000357885 | 0.306719498 |
| cg21768566 |                                    | 2.58E-05    | 0.306708927 |
| cg12713060 |                                    | 1.50E-05    | 0.306700619 |
| cg00646347 | UTF1                               | 3.34E-05    | 0.306699498 |
| cg14216285 |                                    | 7.23E-05    | 0.306697923 |
| cg05523056 | ADAMTS18                           | 9.24E-05    | 0.306687212 |
| cg05205647 |                                    | 0.000233422 | 0.306680508 |
| cg05929882 | TBX5;TBX5                          | 7.23E-05    | 0.306667437 |
| cg18515591 | BTG4;MIR34C;MIR34B                 | 9.24E-05    | 0.306663235 |
| cg05467160 | EVX2                               | 8.60E-06    | 0.306657228 |
| cg20799917 | GALM                               | 0.00043997  | 0.306655971 |
| cg04959480 | SFRP2                              | 0.000537905 | 0.306621861 |
| cg07588113 | C7orf63;C7orf63                    | 0.000357885 | 0.306606437 |
| cg10189962 |                                    | 9.24E-05    | 0.306601679 |
| cg03903246 | FMN2                               | 5.59E-05    | 0.306595027 |
| cg09748975 | MSX1                               | 0.003734675 | 0.306582625 |
| cg18238236 |                                    | 5.59E-05    | 0.306564085 |
| cg09178678 |                                    | 3.34E-05    | 0.306561429 |
| cg20461912 | FOXL2;FOXL2                        | 8.60E-06    | 0.306553048 |
| cg13452162 | CLDN10;CLDN10;CLDN10               | 1.50E-05    | 0.306550521 |
| cg15148683 |                                    | 8.60E-06    | 0.306537302 |
| cg12363472 |                                    | 5.59E-05    | 0.306518884 |
| cg01234044 |                                    | 8.60E-06    | 0.306501501 |
| cg19616230 | SLC34A2                            | 0.000290372 | 0.306495817 |
| cg14296561 | BIRC3;BIRC3                        | 0.000187194 | 0.306486584 |
| cg10693058 | SPTBN4                             | 0.000148457 | 0.30646611  |
| cg26305174 | SLC12A9;TRIP6                      | 0.001147425 | 0.30646449  |
| cg24643102 | GRM7;GRM7                          | 5.59E-05    | 0.306459492 |
| cg03876413 |                                    | 0.000357885 | 0.306449023 |
| cg16458494 |                                    | 9.24E-05    | 0.306446538 |
| cg11358945 | NR4A2                              | 0.000654035 | 0.306431814 |
| cg20066792 |                                    | 0.000233422 | 0.306431683 |
| cg05265484 | TOM1L1                             | 0.000148457 | 0.306421507 |
| cg05511722 |                                    | 9.24E-05    | 0.306417203 |
| cg05374654 | GPR83                              | 0.000148457 | 0.306415086 |
| cg26097011 | FGF14                              | 0.001376172 | 0.306411989 |
| cg19428336 | FAT1                               | 0.000791389 | 0.306411421 |
| cg19041006 | PEG3;PEG3;ZIM2;PEG3;PEG3;ZIM2;ZIM2 | 8.60E-06    | 0.306407114 |
| cg14114673 | GLIS3;GLIS3                        | 0.000537905 | 0.306392619 |
| cg27350402 |                                    | 2.58E-05    | 0.306382414 |
| cg21039380 |                                    | 7.23E-05    | 0.306371142 |
| cg09202227 | SMPD3                              | 0.000654035 | 0.306361063 |
| cg15812348 | FEZF2                              | 0.001147425 | 0.306355703 |

|            |                                      |             |             |
|------------|--------------------------------------|-------------|-------------|
| cg05654290 | GDA                                  | 1.50E-05    | 0.306353678 |
| cg01506917 | TRERF1                               | 0.000117986 | 0.306336549 |
| cg08894362 | CXCL1                                | 9.24E-05    | 0.306326834 |
| cg08183724 |                                      | 0.000654035 | 0.306317928 |
| cg13441156 | GHRL;GHRL;GHRL;GHRL;GHRL;GHRL;GHRL;  | 0.007873393 | 0.306317776 |
| cg18262616 | GJB3;GJB3                            | 0.000187194 | 0.306314196 |
| cg07334912 | DTD1                                 | 8.60E-06    | 0.306304902 |
| cg02849507 |                                      | 0.00043997  | 0.306291595 |
| cg02192673 | NPFFR2;NPFFR2                        | 5.59E-05    | 0.306256588 |
| cg17451609 | EBF2                                 | 0.000357885 | 0.306255789 |
| cg08195247 |                                      | 0.000148457 | 0.306254624 |
| cg24799909 |                                      | 0.00043997  | 0.306252734 |
| cg23319477 | TAPBP;TAPBP;RGL2;RGL2                | 0.00043997  | 0.306251179 |
| cg15591803 | DENND2D                              | 1.50E-05    | 0.306243187 |
| cg05238375 | ADRA2A                               | 7.23E-05    | 0.306225749 |
| cg12721068 | HHIPL2                               | 3.34E-05    | 0.306220288 |
| cg20299697 | MRAS;MRAS                            | 3.92E-05    | 0.306206243 |
| cg23512231 |                                      | 1.96E-05    | 0.306204457 |
| cg20876760 |                                      | 0.000187194 | 0.306195548 |
| cg07654012 |                                      | 0.00043997  | 0.306192116 |
| cg10271819 | HIPK2;HIPK2                          | 0.000791389 | 0.30618302  |
| cg17480760 | CA3                                  | 0.000262362 | 0.306178555 |
| cg13862384 |                                      | 0.000791389 | 0.306172038 |
| cg15668468 | VAX1;VAX1                            | 0.000148457 | 0.306165308 |
| cg11787167 | NPAS3;NPAS3;NPAS3;NPAS3              | 0.001147425 | 0.306163881 |
| cg02448922 |                                      | 7.23E-05    | 0.306162691 |
| cg14951193 | PLIN5                                | 0.001147425 | 0.306157382 |
| cg21834061 |                                      | 9.24E-05    | 0.306143766 |
| cg07382943 | IGLON5                               | 5.59E-05    | 0.306141197 |
| cg08950161 |                                      | 0.000537905 | 0.306138705 |
| cg14567424 | GSTP1                                | 0.000357885 | 0.306123685 |
| cg23039807 |                                      | 0.000187194 | 0.306111733 |
| cg03355213 | CHMP4B                               | 0.000117986 | 0.30610555  |
| cg08683938 | OPCML                                | 2.58E-05    | 0.306093687 |
| cg15749148 | C10orf79                             | 0.000290372 | 0.30607687  |
| cg06001419 |                                      | 0.000537905 | 0.306057379 |
| cg14118997 |                                      | 0.000187194 | 0.306054327 |
| cg16400631 |                                      | 0.000537905 | 0.306036043 |
| cg17787159 | PNMAL1;PNMAL1                        | 0.003189589 | 0.30603311  |
| cg13441058 |                                      | 0.000526175 | 0.306024827 |
| cg06738242 | TWIST2                               | 0.000955793 | 0.306023879 |
| cg18602913 |                                      | 3.34E-05    | 0.306022115 |
| cg17332198 | AVIL                                 | 0.000148457 | 0.30602054  |
| cg06919440 | CBLN1                                | 1.96E-05    | 0.306006201 |
| cg11703632 |                                      | 0.000117986 | 0.306004937 |
| cg10186400 | ENPP5                                | 1.50E-05    | 0.306004934 |
| cg09511896 | WNT3A                                | 0.000365373 | 0.305996917 |
| cg20489909 |                                      | 5.59E-05    | 0.305987912 |
| cg21158502 |                                      | 0.001639597 | 0.305985181 |
| cg03496114 |                                      | 0.000233422 | 0.305979256 |
| cg02621130 |                                      | 0.000187194 | 0.305971825 |
| cg25688568 |                                      | 0.000187194 | 0.305961083 |
| cg18462898 | LOC729991-MEF2B;LOC729991-MEF2B;MEF2 | 8.60E-06    | 0.305950659 |
| cg12074545 | ZNF35                                | 0.009066563 | 0.305949984 |
| cg02088996 | LOC285954                            | 0.003734675 | 0.305940492 |
| cg11453719 |                                      | 4.34E-05    | 0.305919022 |
| cg25844590 | PPFIBP2                              | 9.24E-05    | 0.305917171 |
| cg24218295 |                                      | 8.60E-06    | 0.305910847 |
| cg02174359 | MRPS18A                              | 0.000187194 | 0.305898899 |
| cg11018769 |                                      | 0.00043997  | 0.305891306 |

|            |                                       |             |             |
|------------|---------------------------------------|-------------|-------------|
| cg05409340 |                                       | 9.24E-05    | 0.305877427 |
| cg15885628 | OCA2                                  | 5.59E-05    | 0.305873972 |
| cg09156233 | BMPR1B                                | 0.0050758   | 0.305873859 |
| cg01966465 | RUNDC3B;RUNDC3B;ABCB1;RUNDC3B         | 0.000148457 | 0.305862162 |
| cg05902522 | WWTR1;WWTR1;WWTR1                     | 0.000117986 | 0.305861663 |
| cg25551714 |                                       | 9.24E-05    | 0.305858578 |
| cg23908228 | KCNE1;KCNE1;KCNE1                     | 0.000233422 | 0.305852075 |
| cg07220939 | SLC22A12;SLC22A12;SLC22A12;SLC22A12   | 1.50E-05    | 0.305849881 |
| cg03717750 | PAWR                                  | 0.001376172 | 0.305829675 |
| cg04127342 | PENK;PENK                             | 9.24E-05    | 0.305826332 |
| cg01777861 |                                       | 2.80E-05    | 0.305817192 |
| cg22286764 |                                       | 8.60E-06    | 0.305805272 |
| cg23148467 | MSX2                                  | 0.000117986 | 0.305805066 |
| cg07587893 |                                       | 1.11E-05    | 0.305799628 |
| cg12989851 |                                       | 7.23E-05    | 0.305788414 |
| cg24424381 | WDR93;PEX11A                          | 0.000187194 | 0.305776137 |
| cg10897223 | TRIM40                                | 8.60E-06    | 0.305770408 |
| cg13832441 | PLEKHA9                               | 1.96E-05    | 0.305754957 |
| cg15870818 | TTC14;TTC14                           | 5.59E-05    | 0.305744716 |
| cg23822879 | PDZRN3                                | 0.000187194 | 0.305727634 |
| cg00460235 | ADRA1A;ADRA1A;ADRA1A;ADRA1A           | 7.23E-05    | 0.305726875 |
| cg16267322 | SLC24A4;SLC24A4;SLC24A4               | 0.000290372 | 0.305720325 |
| cg27338487 | GRP;GRP;GRP;GRP;GRP;GRP               | 0.000290372 | 0.305712946 |
| cg08190291 | ADAMTS5                               | 9.24E-05    | 0.305681999 |
| cg04996873 | KIAA1026;KIAA1026                     | 1.96E-05    | 0.305668067 |
| cg04685170 | PON3                                  | 0.00043997  | 0.305667265 |
| cg23378989 |                                       | 0.000233422 | 0.305656992 |
| cg11945167 | CSMD1                                 | 0.003189589 | 0.305655351 |
| cg19907305 | COMP                                  | 0.000187194 | 0.305649337 |
| cg07341290 |                                       | 0.000290372 | 0.305638819 |
| cg21642103 | TNXB                                  | 0.0059649   | 0.305635662 |
| cg08278554 | C15orf48;C15orf48;C15orf48            | 0.000537905 | 0.305635168 |
| cg07420362 | TRPC2                                 | 0.002714607 | 0.305634332 |
| cg16508480 | ADAMTS16                              | 4.34E-05    | 0.305626116 |
| cg21146184 |                                       | 0.000537905 | 0.305619778 |
| cg24169486 |                                       | 0.000117986 | 0.305615212 |
| cg12894711 | BLVRA                                 | 0.000233422 | 0.305614539 |
| cg26172504 | KLK7;KLK7                             | 4.34E-05    | 0.305605903 |
| cg16023415 |                                       | 0.001948248 | 0.305579241 |
| cg12256206 | DACT2                                 | 5.59E-05    | 0.305578002 |
| cg26374305 | MEG3;MEG3;MEG3                        | 2.58E-05    | 0.305569332 |
| cg16099023 |                                       | 4.34E-05    | 0.305560337 |
| cg07855083 | SATB2                                 | 0.000205664 | 0.305558714 |
| cg09736162 | CELSR3                                | 3.34E-05    | 0.305548794 |
| cg21963854 | MIR548H4                              | 0.000290372 | 0.305534223 |
| cg06367693 | STOX2;STOX2                           | 4.34E-05    | 0.305527715 |
| cg15186181 | SOX17                                 | 0.003189589 | 0.305517397 |
| cg03363565 | RAB11FIP3                             | 0.001948248 | 0.305493661 |
| cg22897615 | PRRT1                                 | 0.000955793 | 0.305491181 |
| cg17389504 | MKX                                   | 8.60E-06    | 0.305483411 |
| cg17062279 | ITGAE                                 | 0.002714607 | 0.305479475 |
| cg23596620 | RPH3A;RPH3A                           | 5.59E-05    | 0.305472828 |
| cg20870885 | TFCP2L1                               | 0.000791389 | 0.30547091  |
| cg15489979 | REM1                                  | 1.96E-05    | 0.305461374 |
| cg10070185 | SERPINA1;SERPINA1;SERPINA1;SERPINA1;S | 0.000117986 | 0.305448072 |
| cg09125812 | ANK1;ANK1;ANK1;ANK1;ANK1              | 0.000654035 | 0.305442819 |
| cg03216529 | TFAP2C                                | 0.000117986 | 0.3054385   |
| cg00500564 | FAM196A;DOCK1                         | 0.000233422 | 0.305435597 |
| cg04187935 |                                       | 0.000117986 | 0.305434052 |
| cg27332878 | ARNT2                                 | 0.000148457 | 0.305429057 |

|            |                                         |             |             |
|------------|-----------------------------------------|-------------|-------------|
| cg06974428 | PIP4K2A                                 | 9.24E-05    | 0.305417133 |
| cg20730770 | PCDHB16                                 | 5.59E-05    | 0.305415677 |
| cg26337312 | LMX1A                                   | 0.000791389 | 0.305406951 |
| cg07545037 | HOXC4;HOXC5;HOXC6;HOXC6                 | 8.60E-06    | 0.305404459 |
| cg03642463 | HRNBP3                                  | 0.000537905 | 0.305392119 |
| cg23885415 | VAX2                                    | 0.000791389 | 0.305376043 |
| cg09258804 | TBX4                                    | 1.50E-05    | 0.305375964 |
| cg02976109 | GTF2H3;EIF2B1                           | 7.23E-05    | 0.305374687 |
| cg14214706 | FGF14                                   | 0.000233422 | 0.305371274 |
| cg25026992 | PCDHB7;PCDHB7                           | 0.003189589 | 0.305369286 |
| cg00294109 | CRBN                                    | 0.000290372 | 0.305357508 |
| cg19203333 |                                         | 0.000187194 | 0.305350783 |
| cg02906238 | TFCP2L1;TFCP2L1                         | 0.000955793 | 0.305346525 |
| cg24316515 | NKAIN3                                  | 0.000187194 | 0.30534194  |
| cg17003736 | ZIC4;ZIC4;ZIC4;ZIC4;ZIC4                | 0.000117986 | 0.305338776 |
| cg01856162 | ECEL1                                   | 9.04E-05    | 0.305335477 |
| cg24733530 |                                         | 0.000233422 | 0.305333717 |
| cg22265644 | NKX2-2                                  | 0.000117986 | 0.305326547 |
| cg02956542 | PGLYRP4                                 | 0.000148457 | 0.305309954 |
| cg00513220 | MOSC2                                   | 3.34E-05    | 0.305299995 |
| cg25313172 | KRT7                                    | 9.24E-05    | 0.305268186 |
| cg04225089 | TRIM47                                  | 9.24E-05    | 0.305263175 |
| cg00484711 |                                         | 0.001376172 | 0.305252584 |
| cg19411008 |                                         | 4.34E-05    | 0.305225362 |
| cg25784280 | DTNA;DTNA;DTNA;DTNA;DTNA                | 0.003734675 | 0.305206819 |
| cg13353699 | WASF3                                   | 0.000654035 | 0.305204672 |
| cg21069005 |                                         | 0.001639597 | 0.305202986 |
| cg24884703 |                                         | 0.000187194 | 0.305197988 |
| cg14927519 | CREB5;CREB5                             | 0.003189589 | 0.305175296 |
| cg13683827 | FAM113B                                 | 7.23E-05    | 0.305166717 |
| cg03381237 | RBM33                                   | 4.34E-05    | 0.305153375 |
| cg08153621 |                                         | 0.000233422 | 0.305150951 |
| cg17080163 |                                         | 0.000357885 | 0.305139508 |
| cg17679781 |                                         | 1.96E-05    | 0.305136706 |
| cg02075820 | NUCB2                                   | 0.000955793 | 0.305125377 |
| cg08278892 | RDH13;RDH13;RDH13;RDH13                 | 1.96E-05    | 0.305120527 |
| cg13325154 | PITX3                                   | 0.000955793 | 0.305100017 |
| cg01613010 |                                         | 9.24E-05    | 0.305091844 |
| cg24685998 | LRIG3;LRIG3;LRIG3                       | 2.58E-05    | 0.305090397 |
| cg23006497 |                                         | 0.000117986 | 0.305088652 |
| cg19418458 |                                         | 0.001147425 | 0.305079902 |
| cg01524278 |                                         | 1.11E-05    | 0.305071717 |
| cg04340729 |                                         | 3.08E-05    | 0.305071192 |
| cg13027965 | PHACTR2;PHACTR2;PHACTR2;PHACTR2         | 0.001948248 | 0.305067451 |
| cg06383163 | FAM135B                                 | 0.000290372 | 0.305064126 |
| cg10635194 | KCND3;KCND3                             | 0.000187194 | 0.305063713 |
| cg01416712 | PHOX2B;PHOX2B                           | 0.000537905 | 0.305063203 |
| cg10435849 | COL6A2;COL6A2;COL6A2                    | 0.001639597 | 0.305044688 |
| cg04326198 |                                         | 0.00045851  | 0.305041745 |
| cg26116742 | GABRG2;GABRG2;GABRG2                    | 0.000117986 | 0.305039564 |
| cg25021259 | PPP2R2B;PPP2R2B;PPP2R2B;PPP2R2B;PPP2R2B | 7.23E-05    | 0.305034618 |
| cg08943494 | PRR5L;PRR5L;PRR5L;PRR5L;PRR5L           | 0.001376172 | 0.305021164 |
| cg06571387 | HOXD12                                  | 1.11E-05    | 0.305013038 |
| cg18852765 | BAIAP2L1                                | 0.000955793 | 0.304983167 |
| cg16909733 | ANKMY1;ANKMY1                           | 0.000233422 | 0.304974359 |
| cg00508543 | ADAMTS9                                 | 0.000233422 | 0.304950944 |
| cg13690178 | SLC2A10;SLC2A10                         | 0.000537905 | 0.304950524 |
| cg05937194 | PCOLCE2                                 | 0.000791389 | 0.304942175 |
| cg08175609 |                                         | 8.60E-06    | 0.304934536 |
| cg14120703 | NOTCH1                                  | 8.60E-06    | 0.304922752 |

|            |                                    |             |             |
|------------|------------------------------------|-------------|-------------|
| cg05563515 | RNF39;RNF39                        | 0.00043997  | 0.304917339 |
| cg22410057 | C15orf38                           | 7.23E-05    | 0.304907984 |
| cg08295543 | IRX6                               | 1.96E-05    | 0.304899402 |
| cg06832008 |                                    | 5.59E-05    | 0.304895993 |
| cg12949975 | GDF7                               | 0.000866489 | 0.304888186 |
| cg26499055 | SIM1                               | 9.24E-05    | 0.304873816 |
| cg09761352 | CRB3;CRB3;CRB3;CRB3                | 0.000791389 | 0.304873015 |
| cg19346371 | TBX3;TBX3                          | 7.23E-05    | 0.304866002 |
| cg07920525 |                                    | 0.001639597 | 0.304859913 |
| cg00919411 |                                    | 4.34E-05    | 0.304842859 |
| cg00842325 |                                    | 7.23E-05    | 0.30482789  |
| cg18534992 |                                    | 5.59E-05    | 0.304819889 |
| cg25929533 | C6orf174                           | 2.58E-05    | 0.304787607 |
| cg24002167 | EDIL3                              | 0.000148457 | 0.304787427 |
| cg12405599 | RPN1                               | 0.001147425 | 0.304783786 |
| cg00184732 | GLDN;GLDN                          | 1.96E-05    | 0.304781084 |
| cg10043037 | FERD3L                             | 3.34E-05    | 0.304773932 |
| cg23501406 | DRD4                               | 0.00043997  | 0.304772822 |
| cg13643796 | ADAMTS3                            | 0.00043997  | 0.304759881 |
| cg12188268 | HHIPL1;HHIPL1                      | 0.000290372 | 0.30475919  |
| cg00974864 | FCGR3B;FCGR3B                      | 0.000654035 | 0.304746192 |
| cg11950360 | BRUNOL4;BRUNOL4;BRUNOL4;BRUNOL4    | 5.59E-05    | 0.304742542 |
| cg14037837 | PAX6                               | 7.23E-05    | 0.304735368 |
| cg10599770 | FAM3B;FAM3B                        | 0.001147425 | 0.304733684 |
| cg04750910 |                                    | 4.34E-05    | 0.304723827 |
| cg26104475 | LCP2                               | 2.58E-05    | 0.304705602 |
| cg14410589 |                                    | 2.58E-05    | 0.304701835 |
| cg19705910 |                                    | 2.58E-05    | 0.304696993 |
| cg00886554 | NMU                                | 0.000955793 | 0.304690348 |
| cg24156796 |                                    | 1.50E-05    | 0.304686888 |
| cg01499172 | DAAM2                              | 0.000791389 | 0.304677251 |
| cg24216596 | WNT5A                              | 0.005897668 | 0.304675967 |
| cg24288310 | ST8SIA2                            | 2.80E-05    | 0.304675967 |
| cg16485682 | GATA6;GATA6                        | 0.006823935 | 0.304670982 |
| cg26696162 | ZBTB2                              | 0.000791389 | 0.304661785 |
| cg09177106 |                                    | 7.23E-05    | 0.30465306  |
| cg18010752 | WNT5A                              | 4.34E-05    | 0.30463469  |
| cg12031275 |                                    | 0.000537905 | 0.304634143 |
| cg12398330 | ROBO3                              | 0.000148457 | 0.304625998 |
| cg03246914 | TUBB1                              | 0.000290372 | 0.304623059 |
| cg05110943 | DSC2;DSC2                          | 0.007873393 | 0.304620514 |
| cg19815574 | DACT3                              | 8.60E-06    | 0.304617982 |
| cg10533990 | FOLR3                              | 0.00043997  | 0.304610793 |
| cg09799571 | LIN28                              | 0.000791389 | 0.304598956 |
| cg22213821 | TMEM98;TMEM98                      | 2.58E-05    | 0.304566831 |
| cg08813325 | SORCS2                             | 5.59E-05    | 0.30456059  |
| cg24853724 | TRIL                               | 9.24E-05    | 0.304544416 |
| cg01435574 | BARX2                              | 0.005897668 | 0.304526245 |
| cg20992114 | PITX2;PITX2;PITX2                  | 7.23E-05    | 0.304491234 |
| cg15778745 | SLITRK5                            | 0.003189589 | 0.304477479 |
| cg25771096 | C11orf87                           | 3.34E-05    | 0.304470592 |
| cg24033871 |                                    | 0.000791389 | 0.304467579 |
| cg21619814 | PCDHA2;PCDHA1;PCDHA1;PCDHA2;PCDHA2 | 4.34E-05    | 0.304458372 |
| cg16268165 | UNC5A                              | 0.000117986 | 0.304452331 |
| cg10687644 | ATG16L2                            | 0.000187194 | 0.304444489 |
| cg11204139 |                                    | 3.34E-05    | 0.304431386 |
| cg03183058 |                                    | 0.000233422 | 0.304413729 |
| cg27085869 | TMEM171;TMEM171                    | 1.96E-05    | 0.304401411 |
| cg21449150 | SPATA18                            | 0.000654035 | 0.304398576 |
| cg04806942 |                                    | 0.000357885 | 0.304388879 |

|            |                                     |             |             |
|------------|-------------------------------------|-------------|-------------|
| cg25352328 | GLRA1;GLRA1                         | 1.50E-05    | 0.304379577 |
| cg17495715 |                                     | 0.001376172 | 0.304374047 |
| cg22473637 | MCHR2;MCHR2                         | 0.003734675 | 0.304373818 |
| cg05626128 | IFFO2                               | 0.000148457 | 0.304373581 |
| cg26986911 | RXFP3                               | 0.001948248 | 0.304353809 |
| cg03350186 | PRRX1;PRRX1                         | 5.59E-05    | 0.304334289 |
| cg26021714 | RNASE2                              | 2.58E-05    | 0.304323315 |
| cg02132560 | MT1M                                | 0.000357885 | 0.304309488 |
| cg16541852 |                                     | 0.00043997  | 0.304305065 |
| cg14422498 |                                     | 0.000187194 | 0.304291981 |
| cg23262036 |                                     | 0.0050758   | 0.30427936  |
| cg01412469 | INHBA;LOC285954;LOC285954           | 0.000654035 | 0.304273647 |
| cg25326952 | PDIA4                               | 4.34E-05    | 0.304269449 |
| cg20390045 | RAB3C                               | 0.000357885 | 0.304248444 |
| cg01413809 | MCOLN2                              | 7.23E-05    | 0.304245374 |
| cg08476244 | EPB41L5                             | 0.003734675 | 0.304232468 |
| cg15375469 | CPVL;CPVL                           | 0.00043997  | 0.304232207 |
| cg22057720 | SLITRK1;SLITRK1                     | 7.23E-05    | 0.304222659 |
| cg13944018 |                                     | 0.001639597 | 0.304221287 |
| cg02339211 |                                     | 0.001376172 | 0.304215477 |
| cg05290300 |                                     | 0.003734675 | 0.304199934 |
| cg20026178 | WRNIP1;WRNIP1                       | 0.001147425 | 0.304165125 |
| cg26942250 | SNRPA1                              | 1.50E-05    | 0.304164732 |
| cg14507533 |                                     | 7.23E-05    | 0.304162995 |
| cg03671052 |                                     | 0.0050758   | 0.304148355 |
| cg04638468 | TMEM155;LOC100192379                | 0.001948248 | 0.304140753 |
| cg14904464 | NELL2;NELL2;NELL2;NELL2;NELL2;NELL2 | 0.001376172 | 0.304136316 |
| cg06076122 | CDH18;CDH18;CDH18;CDH18             | 7.23E-05    | 0.304132498 |
| cg13211683 | GDF6                                | 0.000148457 | 0.304115386 |
| cg23603891 | HES2                                | 0.00043997  | 0.304086293 |
| cg17878972 | HRASLS;MGC2889                      | 0.000791389 | 0.30407532  |
| cg03804272 | PDE4D;PDE4D                         | 2.58E-05    | 0.304074709 |
| cg06269115 | GAL                                 | 0.003734675 | 0.304067258 |
| cg13388983 | RHOD                                | 0.000117986 | 0.30406413  |
| cg13037201 | PTPN21                              | 2.58E-05    | 0.304061793 |
| cg05536800 | HAND2;NBLA00301                     | 0.000148457 | 0.304061443 |
| cg04052466 | AMH                                 | 0.006823935 | 0.304050234 |
| cg21112168 |                                     | 0.000290372 | 0.304043291 |
| cg03604367 | SCIN                                | 0.000148457 | 0.304034841 |
| cg19732566 |                                     | 0.000148457 | 0.304021681 |
| cg02100819 |                                     | 9.24E-05    | 0.304007924 |
| cg16413030 |                                     | 0.000654035 | 0.304005001 |
| cg24600895 | NLGN1                               | 8.60E-06    | 0.304002218 |
| cg14111928 | MYST4                               | 0.000117986 | 0.303992376 |
| cg26784011 |                                     | 7.23E-05    | 0.303983582 |
| cg06253058 | WWTR1;WWTR1;WWTR1                   | 5.59E-05    | 0.303982846 |
| cg13607226 | GGTA1                               | 0.000117986 | 0.303976141 |
| cg10738239 | SOX21;SOX21                         | 1.96E-05    | 0.303972705 |
| cg27482605 | C19orf51                            | 0.00043997  | 0.303969851 |
| cg08703231 | C16orf68                            | 0.000654035 | 0.303968705 |
| cg08368973 | C11orf9                             | 0.004357816 | 0.303966183 |
| cg27603283 | MMD2;MMD2;MMD2;MMD2                 | 9.24E-05    | 0.30394736  |
| cg22084410 |                                     | 0.000290372 | 0.303944223 |
| cg23527621 | ECE2;CAMK2N2                        | 4.34E-05    | 0.303940739 |
| cg21712322 |                                     | 2.58E-05    | 0.303936521 |
| cg04884011 | PRKG1;PRKG1                         | 0.001147425 | 0.303926313 |
| cg17421623 | KTELC1;KTELC1                       | 0.000117986 | 0.303918596 |
| cg26146542 | DTNA;DTNA;DTNA                      | 7.23E-05    | 0.303918532 |
| cg14896134 |                                     | 9.24E-05    | 0.303917826 |
| cg16329784 | PITX3                               | 0.000537905 | 0.303913758 |



|            |                                    |             |             |
|------------|------------------------------------|-------------|-------------|
| cg17084653 |                                    | 1.11E-05    | 0.303907647 |
| cg19192280 | PRRT1                              | 0.000368365 | 0.303905876 |
| cg05791173 |                                    | 0.000955793 | 0.303896923 |
| cg17907003 |                                    | 1.96E-05    | 0.303896263 |
| cg14838433 | TMEM61                             | 0.000357885 | 0.303895083 |
| cg07717903 | PCDHGA4;PCDHGA1;PCDHGA6;PCDHGA5;PC | 0.000187194 | 0.303886521 |
| cg09326843 |                                    | 8.60E-06    | 0.303880707 |
| cg01897498 | ANKRD19                            | 1.50E-05    | 0.303865062 |
| cg00975624 |                                    | 0.001147425 | 0.303858048 |
| cg16236766 | NOTO                               | 0.000654035 | 0.30385042  |
| cg22389871 | FAM46A                             | 0.001147425 | 0.303847104 |
| cg05321361 | IRX2;IRX2                          | 0.00043997  | 0.303838878 |
| cg15058253 |                                    | 1.11E-05    | 0.303829058 |
| cg02541031 | STK33                              | 5.59E-05    | 0.303817944 |
| cg02856190 | FUT4;FUT4                          | 0.001639597 | 0.303809826 |
| cg14826456 | ADRB1                              | 7.23E-05    | 0.303781207 |
| cg05874732 | TMC2                               | 4.34E-05    | 0.303769115 |
| cg10931792 |                                    | 9.24E-05    | 0.303747097 |
| cg14362312 | ADAMTS13;ADAMTS13;ADAMTS13;ADAMTS1 | 0.000290372 | 0.303725788 |
| cg10655144 | TAAR3                              | 0.000537905 | 0.303725482 |
| cg15765724 | GBX2                               | 0.001639597 | 0.303711313 |
| cg10573018 | RSPO1                              | 0.003189589 | 0.303701035 |
| cg06527213 | KLHL25;MIR1276                     | 1.50E-05    | 0.303694945 |
| cg23689615 | LOXL1                              | 0.000148457 | 0.303690343 |
| cg07283833 | RIPPLY2                            | 2.58E-05    | 0.303664747 |
| cg01037890 | PHYHIPL;PHYHIPL                    | 1.96E-05    | 0.303662185 |
| cg27410337 | NMU                                | 4.34E-05    | 0.303660867 |
| cg21616935 | CCDC11                             | 0.000148457 | 0.303649258 |
| cg14614211 | MKX                                | 1.11E-05    | 0.303623969 |
| cg09643544 | ZNF177;ZNF177                      | 1.96E-05    | 0.303618238 |
| cg08898653 | CAMK2N1                            | 0.000290372 | 0.303593703 |
| cg15687855 | ZNF502;ZNF502;ZNF502;ZNF502        | 3.34E-05    | 0.303590931 |
| cg14818701 | CSGALNACT1;CSGALNACT1              | 0.000290372 | 0.303590581 |
| cg16370398 | HOXC4;HOXC4                        | 0.000791389 | 0.303582243 |
| cg05007997 | SLC11A1;SLC11A1                    | 7.23E-05    | 0.303580664 |
| cg06817516 | DUOX2                              | 0.000233422 | 0.303580113 |
| cg13624385 | PCDH7;PCDH7;PCDH7                  | 0.000233422 | 0.303574073 |
| cg14515453 | TWIST1                             | 9.24E-05    | 0.303565209 |
| cg05574272 | RXFP3                              | 1.96E-05    | 0.303563141 |
| cg21809624 |                                    | 7.23E-05    | 0.303547552 |
| cg16907934 | FAM50B                             | 1.96E-05    | 0.303545432 |
| cg07204747 | FCHSD1                             | 0.000187194 | 0.303532799 |
| cg05994974 | PARP12                             | 0.005897668 | 0.30352904  |
| cg06188545 | PEAR1                              | 0.001948248 | 0.303515561 |
| cg16300565 | ZFR                                | 0.000537905 | 0.303502398 |
| cg16361302 |                                    | 0.000791389 | 0.303499014 |
| cg02572463 | SEMA3E;SEMA3E                      | 5.59E-05    | 0.303492295 |
| cg12400956 |                                    | 0.003734675 | 0.303485145 |
| cg14431006 | BNC1                               | 0.000357885 | 0.303478596 |
| cg25581222 | CSNK1G1                            | 4.34E-05    | 0.303465576 |
| cg18657094 |                                    | 0.000537905 | 0.303445486 |
| cg27343616 | PCSK2;PCSK2                        | 8.60E-06    | 0.303442358 |
| cg19279310 |                                    | 0.000955793 | 0.303432618 |
| cg22853064 | ICAM5                              | 0.000357885 | 0.303431168 |
| cg13910860 | PAX5                               | 0.000233422 | 0.303407358 |
| cg27120934 | LAMA2;LAMA2                        | 0.001639597 | 0.303395834 |
| cg13099330 | RBP1;RBP1;RBP1                     | 7.23E-05    | 0.303394756 |
| cg02056062 | WWTR1;WWTR1;WWTR1                  | 1.11E-05    | 0.303375928 |
| cg24594997 | RBP1;RBP1;RBP1                     | 0.000357885 | 0.303359322 |
| cg14246335 | SLITRK1                            | 0.000148457 | 0.303358074 |

|            |                                     |             |             |
|------------|-------------------------------------|-------------|-------------|
| cg12018098 | SPRED3                              | 0.000290372 | 0.303353407 |
| cg22091421 |                                     | 0.000117986 | 0.303328937 |
| cg14092045 |                                     | 0.003734675 | 0.303323139 |
| cg15627089 |                                     | 0.0050758   | 0.303310731 |
| cg21903395 | TMEM132D                            | 0.000290372 | 0.303310499 |
| cg17285931 | HDAC4                               | 1.11E-05    | 0.303308841 |
| cg19521832 | KCNE1;KCNE1;KCNE1                   | 9.24E-05    | 0.303305768 |
| cg04324615 | FBLN7;FBLN7                         | 0.000233422 | 0.303291421 |
| cg21187554 | ANKRD18A;ANKRD18A;C9orf122          | 0.000233422 | 0.303283929 |
| cg03724964 | FBXO17                              | 5.11E-05    | 0.303280996 |
| cg11341144 | TRA2B                               | 0.000955793 | 0.303279706 |
| cg18350895 | PRKD1                               | 0.000357885 | 0.303277412 |
| cg16562776 |                                     | 4.34E-05    | 0.303273344 |
| cg27420236 | RPRM;RPRM                           | 0.000117986 | 0.303271986 |
| cg07253829 | DPPA4                               | 7.23E-05    | 0.303262819 |
| cg08493063 |                                     | 0.000955793 | 0.303259995 |
| cg21019253 | OVOL2                               | 5.59E-05    | 0.303253081 |
| cg25699034 | C17orf95;JMJD6;JMJD6                | 0.001639597 | 0.303246884 |
| cg09071155 | EVX1                                | 0.000233422 | 0.303240805 |
| cg14767442 |                                     | 9.24E-05    | 0.303232259 |
| cg07678904 | FSD1                                | 0.000148457 | 0.303231081 |
| cg13567403 |                                     | 0.000117986 | 0.303217529 |
| cg14005246 |                                     | 0.000537905 | 0.303210095 |
| cg10095020 | ADAMTSL5;ADAMTSL5                   | 0.002714607 | 0.303201897 |
| cg04272086 | DCC                                 | 1.11E-05    | 0.303198058 |
| cg02059637 | GRB14                               | 8.60E-06    | 0.303197719 |
| cg26005232 | NUDC                                | 4.34E-05    | 0.303194584 |
| cg23352712 | LOX                                 | 0.000233422 | 0.303154043 |
| cg12420755 |                                     | 0.000791389 | 0.30315011  |
| cg22633280 |                                     | 0.001147425 | 0.303146103 |
| cg14419435 |                                     | 0.000117986 | 0.303141622 |
| cg07379055 |                                     | 0.000955793 | 0.303138758 |
| cg17716453 | CYP4F22;CYP4F22                     | 0.000654035 | 0.303136282 |
| cg15724256 | EN1                                 | 0.000233422 | 0.303133871 |
| cg09095551 | SEC14L5                             | 0.000537905 | 0.303127685 |
| cg07140792 |                                     | 1.50E-05    | 0.303127446 |
| cg16605327 | TBX5;TBX5                           | 5.59E-05    | 0.303113904 |
| cg15412772 | MED24;MED24                         | 5.59E-05    | 0.303112103 |
| cg11464895 | UTF1                                | 1.96E-05    | 0.303108806 |
| cg14221550 | MAL2                                | 0.001147425 | 0.303096397 |
| cg17498773 | RAB39                               | 0.000117986 | 0.303089724 |
| cg17168157 | RGS22                               | 0.009066563 | 0.303084145 |
| cg01261007 | GPR6                                | 1.50E-05    | 0.303073857 |
| cg01400884 |                                     | 1.11E-05    | 0.303069177 |
| cg06609489 | NOL4                                | 0.000791389 | 0.303060241 |
| cg13601595 | RP1L1                               | 0.00043997  | 0.303053036 |
| cg14187844 |                                     | 0.000187194 | 0.303052313 |
| cg19284211 | INSM1                               | 7.23E-05    | 0.303050336 |
| cg21405799 | NECAB2                              | 4.34E-05    | 0.303044391 |
| cg17769793 | FAM13A                              | 0.002714607 | 0.303007996 |
| cg14588078 | LOC401463                           | 5.59E-05    | 0.303000754 |
| cg10058779 | SLC22A17;SLC22A17;SLC22A17          | 7.23E-05    | 0.302977788 |
| cg20168837 | C1orf83                             | 3.34E-05    | 0.302958544 |
| cg19094438 | BCAR1;BCAR1;BCAR1;BCAR1;BCAR1;BCAR1 | 0.00043997  | 0.302943121 |
| cg06062084 | ACADL                               | 0.00043997  | 0.302941681 |
| cg14559259 | CCDC140                             | 0.00043997  | 0.302936292 |
| cg10900696 |                                     | 0.000117986 | 0.30293393  |
| cg09393619 |                                     | 9.24E-05    | 0.302927375 |
| cg05155704 | FAM83B                              | 0.000148457 | 0.302926655 |
| cg15628917 | C1orf87                             | 0.000955793 | 0.302905351 |

|            |                                         |             |             |
|------------|-----------------------------------------|-------------|-------------|
| cg14696334 | RCCD1;RCCD1                             | 0.000537905 | 0.302904916 |
| cg24056365 |                                         | 0.001948248 | 0.302889999 |
| cg16291589 | LRRN4                                   | 1.96E-05    | 0.302881917 |
| cg04682905 | FBXL18                                  | 9.24E-05    | 0.302865419 |
| cg19430577 | STEAP4                                  | 0.000233422 | 0.302851418 |
| cg13492364 | FMN2                                    | 0.000233422 | 0.302846493 |
| cg19224201 |                                         | 0.000117986 | 0.302839388 |
| cg00592870 |                                         | 0.000187194 | 0.302837841 |
| cg26516935 |                                         | 0.000290372 | 0.302835611 |
| cg00699986 | VSX1                                    | 0.000537905 | 0.30283483  |
| cg04968806 | SLC6A5                                  | 1.50E-05    | 0.302821735 |
| cg14101302 | RIMS1                                   | 0.000791389 | 0.302821318 |
| cg14125604 | FLRT2                                   | 0.000148457 | 0.302819962 |
| cg11557636 | KIAA1239                                | 0.000290372 | 0.30279459  |
| cg19981991 |                                         | 2.58E-05    | 0.302783435 |
| cg02768694 | C2orf65                                 | 8.60E-06    | 0.302771534 |
| cg00818198 |                                         | 0.000357885 | 0.3027578   |
| cg13541353 | ACO1                                    | 0.000187194 | 0.302740893 |
| cg23805360 | DMRT3                                   | 3.34E-05    | 0.30272036  |
| cg24596116 |                                         | 0.000955793 | 0.302716481 |
| cg01065806 |                                         | 4.34E-05    | 0.302707341 |
| cg09639931 | ZPBP2;ZPBP2                             | 8.60E-06    | 0.302706887 |
| cg08241330 | ABAT;ABAT                               | 1.50E-05    | 0.302702002 |
| cg26988406 | BHLHE22                                 | 0.000117986 | 0.302700149 |
| cg27486427 | RARB;RARB;RARB;RARB                     | 9.04E-05    | 0.302687748 |
| cg10796899 | DIP2C                                   | 0.004357816 | 0.302687196 |
| cg25234732 | LOC389493                               | 8.60E-06    | 0.302675789 |
| cg09823288 |                                         | 1.96E-05    | 0.302672063 |
| cg19040077 | D2HGDH                                  | 0.000955793 | 0.302667855 |
| cg27634020 | AGAP1;AGAP1                             | 0.000187194 | 0.302635174 |
| cg09797463 | LIPA;LIPA                               | 0.000187194 | 0.302632211 |
| cg23054181 | FAM169B                                 | 0.003734675 | 0.302625597 |
| cg11438755 | TMEM20;TMEM20                           | 3.34E-05    | 0.302619702 |
| cg00382944 | PCSK9                                   | 0.000117986 | 0.302590468 |
| cg20704159 | RPH3A;RPH3A;RPH3A;RPH3A                 | 2.58E-05    | 0.302581885 |
| cg01524174 | SOX9                                    | 0.001376172 | 0.302556098 |
| cg18491375 | PLA2G7;PLA2G7                           | 5.59E-05    | 0.302554087 |
| cg24880056 | ASXL3                                   | 0.002304201 | 0.302541679 |
| cg15762032 | GAD2;GAD2                               | 0.000357885 | 0.302540518 |
| cg16621364 | PCDHGA4;PCDHGA2;PCDHGA5;PCDHGB2;PCDHGB3 | 4.34E-05    | 0.302532742 |
| cg20064455 | WNT2;WNT2                               | 4.34E-05    | 0.302531116 |
| cg19184934 | SOX21                                   | 4.34E-05    | 0.302524672 |
| cg14405924 | EBF3                                    | 2.58E-05    | 0.302516928 |
| cg24092914 | VHL;VHL                                 | 0.000233422 | 0.302516285 |
| cg08883213 |                                         | 0.000187194 | 0.302516179 |
| cg11480762 | SLC29A3                                 | 2.58E-05    | 0.302486866 |
| cg21814870 | LPHN3                                   | 0.000117986 | 0.302476539 |
| cg25439973 | RAD21L1                                 | 0.000290372 | 0.302473425 |
| cg05970811 | SRGAP1                                  | 1.50E-05    | 0.302466616 |
| cg16629158 | TFCP2L1                                 | 0.000654035 | 0.302464973 |
| cg11533098 | FAM84A                                  | 7.23E-05    | 0.302443584 |
| cg12964144 | WSCD1                                   | 4.34E-05    | 0.302439726 |
| cg21381065 | DCC                                     | 9.24E-05    | 0.302420032 |
| cg16065899 | ALX4                                    | 0.000117986 | 0.302419149 |
| cg09272849 | UACA;UACA                               | 0.000537905 | 0.302401    |
| cg09233651 | TBX5;TBX5;TBX5;TBX5                     | 0.000791389 | 0.302400289 |
| cg02119348 | A2BP1;A2BP1;A2BP1;A2BP1                 | 8.60E-06    | 0.30239593  |
| cg00352218 |                                         | 5.59E-05    | 0.302374609 |
| cg07570570 | PRIMA1                                  | 0.000290372 | 0.30235221  |
| cg08536228 | SYNPR;SYNPR                             | 0.00043997  | 0.302349792 |

|            |                                         |             |             |
|------------|-----------------------------------------|-------------|-------------|
| cg25109019 | SOX2OT                                  | 1.60E-05    | 0.302344687 |
| cg02700894 | SYN2;SYN2                               | 0.000654035 | 0.302305272 |
| cg07217924 | PTPN5;PTPN5;PTPN5                       | 5.59E-05    | 0.30226033  |
| cg19102771 | CCDC140                                 | 8.60E-06    | 0.30225135  |
| cg16415058 | SORCS1;SORCS1                           | 5.59E-05    | 0.302250591 |
| cg13424029 |                                         | 0.000537905 | 0.30224541  |
| cg24456654 |                                         | 0.000148457 | 0.30223895  |
| cg12484370 | NFIB                                    | 0.001376172 | 0.302236401 |
| cg04128746 | FAM196A;DOCK1                           | 0.001639597 | 0.302227349 |
| cg14320054 |                                         | 3.34E-05    | 0.302225861 |
| cg21051580 | MMD2;MMD2                               | 0.000117986 | 0.302215569 |
| cg04101194 | SLC34A2                                 | 0.000187194 | 0.302183662 |
| cg02264082 |                                         | 4.34E-05    | 0.302183658 |
| cg21155316 | LGTN                                    | 4.34E-05    | 0.302183419 |
| cg08170911 | PRKCD;PRKCD                             | 3.34E-05    | 0.302155746 |
| cg12169536 | CDH2                                    | 0.000955793 | 0.302151203 |
| cg12659883 |                                         | 0.001376172 | 0.302148164 |
| cg24899806 | KCND2;KCND2                             | 8.60E-06    | 0.30214466  |
| cg07464571 | LEP                                     | 1.96E-05    | 0.302135509 |
| cg18290233 |                                         | 0.000148457 | 0.302131061 |
| cg19990022 | PCDHB1                                  | 0.000955793 | 0.302121796 |
| cg13552201 | APCDD1L                                 | 2.58E-05    | 0.302103935 |
| cg04476070 | ZC3H18                                  | 3.34E-05    | 0.302092084 |
| cg09950916 |                                         | 0.007873393 | 0.302090366 |
| cg23472708 | MNX1;MNX1                               | 0.003189589 | 0.30207278  |
| cg16621833 | VGLL2;VGLL2                             | 0.001147425 | 0.302066526 |
| cg02346737 | ARHGAP26;ARHGAP26                       | 0.000290372 | 0.302062685 |
| cg20812988 |                                         | 1.96E-05    | 0.302050908 |
| cg16581536 | FOXA1                                   | 0.002714607 | 0.302046739 |
| cg01579765 | HSF2BP                                  | 0.005897668 | 0.302030739 |
| cg07477922 | NANOG                                   | 0.000357885 | 0.302024369 |
| cg23799901 | GPR37                                   | 0.000187194 | 0.302024043 |
| cg18694169 | NKAPL                                   | 0.000955793 | 0.302004311 |
| cg21883293 |                                         | 1.11E-05    | 0.302003347 |
| cg21095561 | C17orf104                               | 9.24E-05    | 0.301993084 |
| cg20457732 |                                         | 0.000537905 | 0.301989964 |
| cg03919488 | PPM1H                                   | 0.00043997  | 0.301985097 |
| cg09326204 | CASR                                    | 0.000290372 | 0.301963946 |
| cg10830145 |                                         | 0.006823935 | 0.301962516 |
| cg18276638 |                                         | 0.006738759 | 0.30196212  |
| cg04905434 | MAFA                                    | 0.000117986 | 0.301954866 |
| cg07979236 |                                         | 0.001948248 | 0.301943892 |
| cg11943209 | OSR1                                    | 2.58E-05    | 0.301936675 |
| cg19476053 | CCDC140                                 | 1.11E-05    | 0.301917903 |
| cg20329085 | ASXL3                                   | 0.001948248 | 0.301904489 |
| cg26398656 | OSBPL1A;OSBPL1A                         | 0.007873393 | 0.301898292 |
| cg07711192 |                                         | 0.000117986 | 0.30189506  |
| cg22619824 | ST7;ST7;ST7OT2                          | 5.59E-05    | 0.301888676 |
| cg00455526 | TRIL                                    | 0.0050758   | 0.301887784 |
| cg13874425 |                                         | 0.001639597 | 0.301887526 |
| cg06049781 | CYP26B1                                 | 0.001948248 | 0.301885122 |
| cg13314310 | WDR35;WDR35                             | 9.24E-05    | 0.301883472 |
| cg01196322 | PRDM6                                   | 9.24E-05    | 0.301874505 |
| cg24871887 |                                         | 5.59E-05    | 0.301873921 |
| cg08427067 |                                         | 0.000187194 | 0.30187297  |
| cg21117330 | PCDHGA4;PCDHGA6;PCDHGA1;PCDHGA5;PCDHGA5 | 0.000357885 | 0.301868241 |
| cg12486537 | PPP1R3C                                 | 0.003734675 | 0.301867774 |
| cg22829917 | HOTAIR                                  | 3.34E-05    | 0.30186692  |
| cg23596233 | B3GAT1;B3GAT1                           | 0.001147425 | 0.301862093 |
| cg26416811 | RFX6                                    | 8.60E-06    | 0.301860864 |

|            |                                              |             |             |
|------------|----------------------------------------------|-------------|-------------|
| cg09078517 | KCND2                                        | 9.24E-05    | 0.301859708 |
| cg26076905 | PIK3R1                                       | 5.59E-05    | 0.301844743 |
| cg08132815 | UHRF1;UHRF1                                  | 3.34E-05    | 0.301842053 |
| cg01557989 | SLC24A3                                      | 0.000148457 | 0.301841229 |
| cg23357708 | ZNF414;ZNF414                                | 0.0050758   | 0.301821932 |
| cg21350697 | LRRC27;LRRC27;LRRC27;LRRC27;LRRC27           | 0.000955793 | 0.301818583 |
| cg14505704 | CDH6                                         | 3.34E-05    | 0.301817176 |
| cg19147415 | RAB30                                        | 0.000654035 | 0.30178445  |
| cg26021960 |                                              | 4.34E-05    | 0.301776621 |
| cg03505117 |                                              | 0.000187194 | 0.30177523  |
| cg07323825 |                                              | 0.000233422 | 0.301772849 |
| cg16587952 |                                              | 0.001948248 | 0.301766232 |
| cg19024969 | C17orf102                                    | 0.000187194 | 0.30176563  |
| cg04362887 |                                              | 1.96E-05    | 0.301762054 |
| cg04483289 | SKAP1;SKAP1                                  | 0.002304201 | 0.301751217 |
| cg24621972 | PAX3;PAX3;PAX3;PAX3;PAX3;PAX3;PAX3;PAX3;PAX3 | 0.000233422 | 0.301741775 |
| cg14119337 | MEG3;MEG3;MEG3                               | 8.60E-06    | 0.301738876 |
| cg01920232 | RFX4                                         | 3.34E-05    | 0.301735037 |
| cg22676693 | DAB1                                         | 7.23E-05    | 0.301727281 |
| cg01348584 | RADIL                                        | 0.001639597 | 0.301724603 |
| cg16670554 | LBXCOR1                                      | 0.000791389 | 0.301721776 |
| cg03504078 | PCDHB3                                       | 4.34E-05    | 0.301718942 |
| cg19594218 | L1TD1;L1TD1;L1TD1;L1TD1                      | 1.11E-05    | 0.301715586 |
| cg26298409 | MKX                                          | 0.000117986 | 0.301708761 |
| cg05742247 | RSPO2                                        | 1.96E-05    | 0.301700435 |
| cg13706544 | LHFPL3                                       | 4.34E-05    | 0.301694359 |
| cg08454687 |                                              | 0.000117986 | 0.30168842  |
| cg13655674 | TBX15                                        | 0.000187194 | 0.301683426 |
| cg25705508 | CHIT1                                        | 0.000290372 | 0.30168082  |
| cg19407095 | SOX1                                         | 0.000537905 | 0.301680105 |
| cg12134633 | SCG5;SCG5                                    | 0.000537905 | 0.301673544 |
| cg01596292 | RNF19A;RNF19A                                | 0.000187194 | 0.301661812 |
| cg15646817 | RASGRF2                                      | 0.000791389 | 0.301660476 |
| cg04097639 | NR5A2;NR5A2                                  | 0.006823935 | 0.301643997 |
| cg23370213 | SLC7A2                                       | 0.000357885 | 0.30164349  |
| cg26727693 | AVPR1A                                       | 4.34E-05    | 0.301626417 |
| cg21389309 | DPP6;DPP6;DPP6                               | 0.000148457 | 0.301616968 |
| cg18535011 | CDH6                                         | 0.000187194 | 0.30160811  |
| cg03529432 | HOXA6                                        | 0.001376172 | 0.301602424 |
| cg04088697 | DLX6AS                                       | 9.24E-05    | 0.301597168 |
| cg19727439 | GRIK3                                        | 0.003189589 | 0.301570568 |
| cg03670381 |                                              | 0.000117986 | 0.301565426 |
| cg20155875 | WIP1                                         | 0.000654035 | 0.301562885 |
| cg06897628 |                                              | 2.58E-05    | 0.301557849 |
| cg25301406 | DNER                                         | 0.001147425 | 0.301548957 |
| cg09987740 | GULP1                                        | 2.80E-05    | 0.301544145 |
| cg21306006 | LOC441177;C6orf176;C6orf176                  | 4.34E-05    | 0.301539464 |
| cg09100271 |                                              | 0.000148457 | 0.301519549 |
| cg16474170 | PTPRM;PTPRM                                  | 0.005897668 | 0.301517318 |
| cg22258315 |                                              | 4.34E-05    | 0.30151719  |
| cg00685291 | ASPG                                         | 0.000537905 | 0.301508374 |
| cg02851062 | BSX                                          | 3.34E-05    | 0.301489714 |
| cg24644551 |                                              | 2.58E-05    | 0.301469904 |
| cg12800028 | GPR6                                         | 2.58E-05    | 0.301467164 |
| cg07598952 | NMBR                                         | 3.34E-05    | 0.301464817 |
| cg06076323 | ARHGEF10                                     | 0.000357885 | 0.301460686 |
| cg23260993 | EFEMP1;EFEMP1;EFEMP1                         | 0.003189589 | 0.301458745 |
| cg03716999 | RNF207                                       | 0.006823935 | 0.301454613 |
| cg08148553 | AP1M2                                        | 0.002304201 | 0.30145215  |
| cg03882242 | C12orf42;C12orf42                            | 0.002304201 | 0.301450465 |

|            |                                    |             |             |
|------------|------------------------------------|-------------|-------------|
| cg23845889 | MTMR7                              | 8.60E-06    | 0.30144712  |
| cg21223983 |                                    | 0.002304201 | 0.301432043 |
| cg09247619 | PTPRC;PTPRC;PTPRC;PTPRC            | 0.000233422 | 0.301431796 |
| cg03772350 | FOXA1                              | 8.60E-06    | 0.301430319 |
| cg12670477 | IGSF22                             | 7.23E-05    | 0.301423186 |
| cg14565725 | TBX15;TBX15                        | 0.00045851  | 0.301422721 |
| cg07392724 | GPR37                              | 4.34E-05    | 0.301419624 |
| cg14282221 |                                    | 1.96E-05    | 0.301417136 |
| cg14239811 | AADAT;AADAT                        | 0.000654035 | 0.301410907 |
| cg17651959 |                                    | 9.24E-05    | 0.301396862 |
| cg19419146 | STK32A;STK32A                      | 4.34E-05    | 0.301393008 |
| cg01308258 | CNTNAP5                            | 2.58E-05    | 0.30138343  |
| cg09657265 | SMPDL3A                            | 0.000357885 | 0.301376114 |
| cg26332740 | WNT3A                              | 0.000187194 | 0.301368282 |
| cg04036920 | C11orf41                           | 3.34E-05    | 0.301344203 |
| cg20104341 | HOXC13                             | 7.23E-05    | 0.301336255 |
| cg13998223 |                                    | 1.11E-05    | 0.301335251 |
| cg22306928 | MIR375                             | 0.000791389 | 0.301332064 |
| cg00357532 | NCKAP1;NCKAP1                      | 5.59E-05    | 0.301316139 |
| cg07162571 | ANK1;ANK1;ANK1;ANK1;ANK1           | 0.002304201 | 0.301309912 |
| cg19499361 | C12orf39                           | 7.23E-05    | 0.301308561 |
| cg15912390 | C3orf21                            | 1.11E-05    | 0.301305933 |
| cg14880499 | FAM123A;FAM123A;FAM123A;FAM123A    | 0.000357885 | 0.30130165  |
| cg18233405 | TSPYL5;TSPYL5                      | 0.006823935 | 0.3012975   |
| cg20977448 | GRPEL2                             | 9.24E-05    | 0.301296002 |
| cg16270526 | ISL1                               | 8.60E-06    | 0.301281781 |
| cg07348009 | PRDM16;FLJ42875;PRDM16;FLJ42875    | 0.000357885 | 0.3012728   |
| cg08392199 | LIFR;LIFR                          | 0.000537905 | 0.301263129 |
| cg10367244 |                                    | 0.000187194 | 0.30124665  |
| cg19344013 | MYO5B                              | 1.96E-05    | 0.301237087 |
| cg25304107 | HOXD4                              | 3.34E-05    | 0.301223879 |
| cg20561716 | CAMK2B;CAMK2B;CAMK2B;CAMK2B;CAMK2B | 0.001639597 | 0.30120993  |
| cg03504245 |                                    | 0.000148457 | 0.301191758 |
| cg14944514 | CADM1;CADM1;CADM1;CADM1            | 9.24E-05    | 0.301169449 |
| cg13845439 | CDH2                               | 9.24E-05    | 0.301167098 |
| cg02008154 | TBX20;TBX20;TBX20;TBX20            | 2.58E-05    | 0.301151554 |
| cg25828963 | FNDC3A                             | 0.00043997  | 0.301147972 |
| cg04420889 | SGK2                               | 2.58E-05    | 0.301134738 |
| cg10656742 | TNFRSF19;TNFRSF19                  | 0.000955793 | 0.301131903 |
| cg01649773 | FIBIN;FIBIN                        | 0.000117986 | 0.301101369 |
| cg19770281 |                                    | 0.003189589 | 0.30108285  |
| cg12176783 | TCEA2;TCEA2                        | 0.00043997  | 0.301080199 |
| cg18725076 | CTNND2                             | 0.001376172 | 0.301067482 |
| cg12424088 |                                    | 1.11E-05    | 0.301062969 |
| cg15778232 | PHB2;PHB2;EMG1                     | 0.000791389 | 0.301059181 |
| cg13775005 | INSM2                              | 3.34E-05    | 0.301057051 |
| cg01645998 | SDR42E1                            | 1.96E-05    | 0.301053019 |
| cg00073837 |                                    | 0.000955793 | 0.301046683 |
| cg09100013 | UNC5C                              | 0.000148457 | 0.301039083 |
| cg25523538 | MKX                                | 0.000117986 | 0.301028492 |
| cg11965311 | LOC145845                          | 0.00043997  | 0.301027665 |
| cg20497803 | FAM83B                             | 7.23E-05    | 0.301013277 |
| cg15990972 |                                    | 1.96E-05    | 0.300980965 |
| cg19360104 | TDRD10;TDRD10;TDRD10;TDRD10;SHE    | 0.000537905 | 0.300954925 |
| cg21184256 |                                    | 0.00043997  | 0.30095294  |
| cg09484032 |                                    | 0.000357885 | 0.300933947 |
| cg06958563 | LOC645323                          | 0.0059649   | 0.300924925 |
| cg01362243 |                                    | 3.34E-05    | 0.300922484 |
| cg05895618 | CSRP3;CSRP3                        | 0.000290372 | 0.300907207 |
| cg24546155 |                                    | 0.001376172 | 0.300896496 |

|            |                                  |             |             |
|------------|----------------------------------|-------------|-------------|
| cg00325531 |                                  | 0.000537905 | 0.30086786  |
| cg01590338 |                                  | 5.59E-05    | 0.300856002 |
| cg08224785 | CYFIP2;CYFIP2;CYFIP2             | 0.000187194 | 0.300850395 |
| cg11125104 | NCRNA00164;MIR663B               | 0.00043997  | 0.300842191 |
| cg01559726 | CACNA2D3                         | 0.000290372 | 0.300838502 |
| cg11900393 | NINJ2                            | 4.34E-05    | 0.300832501 |
| cg13774792 | IGSF9B                           | 9.24E-05    | 0.300829708 |
| cg22040627 | SLC13A5;SLC13A5                  | 3.34E-05    | 0.300829231 |
| cg23053525 | DNAH17                           | 0.001147425 | 0.300825563 |
| cg04464946 | PTPRR;PTPRR                      | 3.34E-05    | 0.300821401 |
| cg02922035 |                                  | 0.000233422 | 0.300820197 |
| cg14355134 |                                  | 5.59E-05    | 0.300799916 |
| cg03052128 |                                  | 7.23E-05    | 0.300782176 |
| cg10185424 | CD180                            | 0.001376172 | 0.300752598 |
| cg09586183 | TLX1;TLX1NB                      | 4.34E-05    | 0.30075221  |
| cg11191210 | VGLL2;VGLL2                      | 4.34E-05    | 0.300729286 |
| cg12681727 | COL6A3;COL6A3;COL6A3             | 0.000187194 | 0.300704836 |
| cg06257708 | FADS6                            | 0.000654035 | 0.300698718 |
| cg03670452 |                                  | 0.001376172 | 0.300694453 |
| cg00292135 | C7orf13;RNF32                    | 0.001639597 | 0.300688713 |
| cg06722216 | NOL4                             | 3.34E-05    | 0.300683025 |
| cg02978184 | ADCY5                            | 0.000334462 | 0.300679582 |
| cg03566418 | C8orf48                          | 0.000148457 | 0.300678275 |
| cg26518861 |                                  | 1.50E-05    | 0.300661034 |
| cg03513163 | PCDHB1                           | 0.000187194 | 0.300642158 |
| cg07167192 | CDC42BPB                         | 0.000148457 | 0.300639319 |
| cg11721610 | KIF14                            | 0.001948248 | 0.30058626  |
| cg13185413 | RNF39;RNF39                      | 0.009066563 | 0.300582581 |
| cg05361489 |                                  | 0.003189589 | 0.300577017 |
| cg12457040 | KCNIP3;KCNIP3                    | 0.002714607 | 0.300576261 |
| cg20207911 | RCVRN                            | 0.000148457 | 0.300557554 |
| cg09362335 |                                  | 0.000537905 | 0.300529653 |
| cg02570354 | OSBPL10                          | 0.000791389 | 0.300525659 |
| cg07520752 | SAMD5                            | 5.59E-05    | 0.300518514 |
| cg21154627 | SLC7A14                          | 3.34E-05    | 0.300510255 |
| cg01870826 | LOC389458                        | 4.34E-05    | 0.300504508 |
| cg05048976 | WNT5A                            | 0.000148457 | 0.300497989 |
| cg19342782 | HHLA3;ANKRD13C;HHLA3;HHLA3;HHLA3 | 0.001376172 | 0.300493522 |
| cg17815049 | CNST;TFB2M;CNST                  | 0.000791389 | 0.300492587 |
| cg14317639 |                                  | 0.001147425 | 0.300489547 |
| cg05600740 | B4GALNT1                         | 0.00043997  | 0.300483697 |
| cg07291445 |                                  | 5.59E-05    | 0.300475557 |
| cg03942265 | CSPG4                            | 0.000233422 | 0.30046467  |
| cg26929536 | SCG3;SCG3                        | 0.000148457 | 0.300390108 |
| cg22022798 |                                  | 0.000357885 | 0.300388577 |
| cg02005147 | HHIPL1;HHIPL1                    | 0.000537905 | 0.300387713 |
| cg18447727 | SLITRK3                          | 0.000187194 | 0.300387256 |
| cg13285174 | OXT                              | 0.000357885 | 0.300371199 |
| cg09200738 | FAM7A2;FAM7A1                    | 0.000117986 | 0.300369797 |
| cg26653360 | WDR93;PEX11A                     | 0.000357885 | 0.300368326 |
| cg14677983 | CARS2                            | 1.50E-05    | 0.300362844 |
| cg00063773 | PLS1                             | 0.000187194 | 0.300352334 |
| cg10034364 |                                  | 0.000357885 | 0.300333343 |
| cg01366419 | WBSCR17                          | 0.001147425 | 0.300314599 |
| cg02340083 |                                  | 0.000117986 | 0.300303976 |
| cg24202381 |                                  | 0.000290372 | 0.300298135 |
| cg11702639 |                                  | 0.002714607 | 0.300273123 |
| cg11632238 |                                  | 7.23E-05    | 0.300270137 |
| cg17481903 |                                  | 0.000187194 | 0.300269792 |
| cg13718729 | GRIN1;GRIN1;GRIN1                | 0.000791389 | 0.300255632 |

|            |                                        |             |              |
|------------|----------------------------------------|-------------|--------------|
| cg00255368 | ESRRG                                  | 1.50E-05    | 0.300245995  |
| cg13036855 | CHDH;IL17RB                            | 0.000955793 | 0.30023343   |
| cg23663760 | WNT3A                                  | 7.23E-05    | 0.300217068  |
| cg06271087 | MAGI1;MAGI1                            | 1.11E-05    | 0.300216576  |
| cg12856183 |                                        | 9.24E-05    | 0.300215629  |
| cg02185666 | NRP2;NRP2;NRP2;NRP2;NRP2;NRP2          | 7.23E-05    | 0.300208975  |
| cg24674368 |                                        | 0.000148457 | 0.300205475  |
| cg18722841 | PHOX2A                                 | 0.000148457 | 0.300198076  |
| cg20800509 | RIMS2;RIMS2                            | 0.000791389 | 0.300195091  |
| cg26828839 | ANO2                                   | 0.000117986 | 0.300189408  |
| cg15681239 | DLEC1;DLEC1                            | 0.001948248 | 0.300180641  |
| cg13306164 | HPCA                                   | 5.11E-05    | 0.30016653   |
| cg12063580 | PACS2;PACS2                            | 2.58E-05    | 0.300153725  |
| cg10066188 | NAT8B;NAT8B                            | 0.009066563 | 0.300140353  |
| cg09540612 | C20orf135                              | 0.004357816 | 0.300120123  |
| cg08920068 | LOX                                    | 0.000233422 | 0.30011789   |
| cg19025461 | FLJ37453                               | 0.001639597 | 0.30010588   |
| cg17758363 |                                        | 0.000791389 | 0.300073965  |
| cg04180086 | IRX4                                   | 0.000117986 | 0.300065687  |
| cg26779676 |                                        | 3.34E-05    | 0.300045713  |
| cg24371033 | AGXT                                   | 0.000290372 | 0.300045097  |
| cg21624359 | FFAR3                                  | 4.34E-05    | 0.300031811  |
| cg02913882 |                                        | 0.001376172 | 0.300028348  |
| cg25973534 | ADAMTS16                               | 0.000537905 | 0.300026086  |
| cg26438325 | JAZF1                                  | 5.59E-05    | 0.300025179  |
| cg08538258 | POFUT2;POFUT2;LOC642852;POFUT2         | 0.000654035 | 0.300020316  |
| cg00074184 | SLC22A15                               | 0.000791389 | 0.300010355  |
| cg03006077 | TGFBR3                                 | 0.000290372 | -0.300060759 |
| cg08495433 | CLIP2;CLIP2                            | 0.000357885 | -0.300130601 |
| cg18564075 | MED13L                                 | 0.005897668 | -0.300202856 |
| cg24460268 | INTS6;INTS6                            | 0.009066563 | -0.300250379 |
| cg03818303 | KCNMB3;KCNMB3                          | 0.000148457 | -0.300255386 |
| cg11606444 | SORL1                                  | 1.96E-05    | -0.300310675 |
| cg24102222 | SLC15A4                                | 0.000357885 | -0.30031323  |
| cg14962007 |                                        | 0.000187194 | -0.30038628  |
| cg17855390 |                                        | 0.006823935 | -0.300393356 |
| cg06800849 | ACSF3;ACSF3;ACSF3                      | 0.001376172 | -0.300399528 |
| cg21399778 | PASK                                   | 0.000290372 | -0.300417153 |
| cg12906963 |                                        | 0.002304201 | -0.300456798 |
| cg19438750 | SV2B;SV2B                              | 0.00043997  | -0.300613999 |
| cg18275512 | ATP2B2;ATP2B2                          | 0.000117986 | -0.3007299   |
| cg13876325 | PIGL                                   | 9.24E-05    | -0.300757338 |
| cg14575854 | GRB7;GRB7                              | 0.000791389 | -0.300797802 |
| cg07855575 |                                        | 0.000357885 | -0.300823624 |
| cg13571479 | MAD1L1;MAD1L1;MAD1L1                   | 7.23E-05    | -0.300843119 |
| cg12477050 | ATP10B                                 | 0.000955793 | -0.300905654 |
| cg26452771 | ODZ4                                   | 0.0050758   | -0.300910953 |
| cg17349406 | ADIG;ADIG                              | 8.60E-06    | -0.300931747 |
| cg14613228 |                                        | 0.001376172 | -0.300949577 |
| cg02692177 |                                        | 0.000290372 | -0.30101827  |
| cg17220749 | GALNT2                                 | 0.000290372 | -0.301029436 |
| cg04554195 | FPR2;FPR2                              | 0.00043997  | -0.301042006 |
| cg10853543 | BCL11A;BCL11A;BCL11A                   | 0.0050758   | -0.30105399  |
| cg15407213 | COL11A2;COL11A2;COL11A2                | 0.0059649   | -0.301070837 |
| cg16124188 |                                        | 3.34E-05    | -0.301097628 |
| cg06621027 | CTNNA2;CTNNA2                          | 1.50E-05    | -0.30120396  |
| cg19262563 | SEMA3C                                 | 0.001691157 | -0.301267892 |
| cg07826859 | MYO1G                                  | 8.60E-06    | -0.301282236 |
| cg18265249 | TCF7L2;TCF7L2;TCF7L2;TCF7L2;TCF7L2;TCF | 0.007873393 | -0.301302787 |
| cg27301488 |                                        | 0.000654035 | -0.301303456 |



|            |                                      |             |              |
|------------|--------------------------------------|-------------|--------------|
| cg02397552 | CLN5                                 | 0.001376172 | -0.301309086 |
| cg17224596 |                                      | 7.23E-05    | -0.301356906 |
| cg19264571 | APCDD1                               | 0.007873393 | -0.301417319 |
| cg24581650 | ERGIC1                               | 0.003734675 | -0.30142701  |
| cg19346632 |                                      | 0.000955793 | -0.301454564 |
| cg19060120 | RPTOR;RPTOR                          | 0.000117986 | -0.301495686 |
| cg10304534 | ABCC4;ABCC4                          | 0.000357885 | -0.301615439 |
| cg17475733 |                                      | 0.000791389 | -0.301722908 |
| cg01716474 | DST;DST;DST;DST                      | 0.000537905 | -0.301750581 |
| cg24166100 |                                      | 9.24E-05    | -0.301771342 |
| cg00786237 |                                      | 0.003189589 | -0.301816252 |
| cg13879523 | PDE9A;PDE9A;PDE9A;PDE9A;PDE9A;PDE9A; | 0.001948248 | -0.301836767 |
| cg23295629 | PVT1                                 | 1.96E-05    | -0.301873778 |
| cg11145776 | SLC6A12;SLC6A12;SLC6A12              | 0.003734675 | -0.302022668 |
| cg14168713 | BICC1                                | 0.00043997  | -0.302178835 |
| cg00438026 | ATP6V1G2;NFKBIL1;NFKBIL1;ATP6V1G2    | 0.000290372 | -0.302179934 |
| cg01148127 | SLC43A2                              | 0.002714607 | -0.302263468 |
| cg02379856 | CAMK2D;CAMK2D;CAMK2D;CAMK2D;CAMK2D   | 0.003189589 | -0.302363712 |
| cg10068572 | CCNY;CCNY                            | 0.000187194 | -0.302398836 |
| cg24076588 | KLHDC7A                              | 0.003734675 | -0.302475932 |
| cg17380943 | FARP1                                | 0.003734675 | -0.302479837 |
| cg26117521 | EBF1                                 | 0.000233422 | -0.302508293 |
| cg27380758 | SORBS3                               | 9.24E-05    | -0.302554357 |
| cg03586240 | MAD1L1;MAD1L1;MAD1L1                 | 4.34E-05    | -0.302569048 |
| cg19009471 |                                      | 7.23E-05    | -0.302643355 |
| cg01179256 | CHST11                               | 4.34E-05    | -0.302661864 |
| cg13506158 | UTS2D;CCDC50;CCDC50                  | 0.00043997  | -0.302669829 |
| cg26048923 | TRAPPC9;TRAPPC9                      | 0.000148457 | -0.302716541 |
| cg00074771 | WDR76;WDR76                          | 0.005897668 | -0.302721591 |
| cg07401516 |                                      | 0.004357816 | -0.302916945 |
| cg06848801 |                                      | 0.000654035 | -0.302919944 |
| cg19835128 |                                      | 0.000233422 | -0.302940195 |
| cg15159987 | CPAMD8                               | 0.00043997  | -0.303004696 |
| cg25302603 | PCNXL3                               | 0.000233422 | -0.303046684 |
| cg15213650 | KDM4B                                | 0.007873393 | -0.303046702 |
| cg00812770 |                                      | 0.000290372 | -0.303052108 |
| cg12620645 |                                      | 4.34E-05    | -0.303065827 |
| cg06869454 |                                      | 0.000654035 | -0.303082403 |
| cg03548512 | C10orf104                            | 3.34E-05    | -0.30313153  |
| cg10722267 |                                      | 0.001147425 | -0.303146245 |
| cg24897506 |                                      | 0.001639597 | -0.303252272 |
| cg19375114 |                                      | 3.34E-05    | -0.303291946 |
| cg26236922 | LAMA5                                | 4.34E-05    | -0.303322944 |
| cg14435659 |                                      | 0.003189589 | -0.303341238 |
| cg20820876 |                                      | 2.58E-05    | -0.303343213 |
| cg24214471 | BLCAP;BLCAP;BLCAP;BLCAP;BLCAP        | 0.001639597 | -0.303346826 |
| cg04095257 | C7orf50;MIR339;C7orf50;C7orf50       | 0.003189589 | -0.303395455 |
| cg19081470 |                                      | 0.000955793 | -0.303402812 |
| cg03625953 | SMG6;SMG6                            | 0.001639597 | -0.303448863 |
| cg20731819 | ADARB2                               | 0.00156564  | -0.303486159 |
| cg13629783 |                                      | 0.000148457 | -0.303546826 |
| cg02449762 |                                      | 0.000117986 | -0.303584068 |
| cg08219486 | RPTOR;RPTOR                          | 0.003189589 | -0.303596526 |
| cg01838965 |                                      | 0.001147425 | -0.303609153 |
| cg10859192 | ATP5G2                               | 0.00043997  | -0.303613777 |
| cg01598733 | ILDR1                                | 0.009066563 | -0.303622671 |
| cg09271709 | NRXN1;NRXN1                          | 0.00043997  | -0.303623197 |
| cg16732367 | RPTOR;RPTOR                          | 0.0050758   | -0.303678956 |
| cg26331247 | LOC284805                            | 0.000148457 | -0.303721774 |
| cg00855461 | SIPA1L2                              | 0.009066563 | -0.303751216 |

|            |                                      |             |              |
|------------|--------------------------------------|-------------|--------------|
| cg07266910 | ZMAT3;ZMAT3                          | 5.59E-05    | -0.303772874 |
| cg21052932 | ABHD12B;ABHD12B                      | 1.96E-05    | -0.303795116 |
| cg07701567 | GABRD                                | 0.000654035 | -0.303858853 |
| cg26106921 |                                      | 0.000148457 | -0.303948208 |
| cg11067179 | CD248                                | 0.003734675 | -0.30404708  |
| cg11838898 | ARHGEF4;ARHGEF4                      | 0.002304201 | -0.304101358 |
| cg16545743 | IL3                                  | 3.34E-05    | -0.304156607 |
| cg13254586 |                                      | 0.002714607 | -0.30424207  |
| cg11564805 |                                      | 0.004357816 | -0.304250923 |
| cg26603047 | FAM38A                               | 0.000187194 | -0.304273036 |
| cg19750643 | TSPAN18                              | 0.000955793 | -0.304353419 |
| cg00621943 | LY6G5C                               | 0.001948248 | -0.304381581 |
| cg04160876 | MYH11;MYH11;MYH11;MYH11              | 0.002304201 | -0.30442374  |
| cg18998365 | NR3C1;NR3C1;NR3C1;NR3C1;NR3C1;NR3C1; | 0.000791389 | -0.304428808 |
| cg07833467 | KLHDC7B;KLHDC7B                      | 0.000187194 | -0.304446603 |
| cg07938480 | OR1F2P                               | 0.000187194 | -0.304466358 |
| cg19326100 | TMCO3                                | 0.001639597 | -0.304574823 |
| cg14116129 |                                      | 9.24E-05    | -0.304587275 |
| cg14136214 | DAB2IP                               | 0.0050758   | -0.30459402  |
| cg06755296 |                                      | 0.002714607 | -0.304708373 |
| cg18184935 | STAC2                                | 0.009066563 | -0.304712114 |
| cg15751131 | SLC37A3;SLC37A3                      | 3.92E-05    | -0.304727396 |
| cg09019347 | TRPV1;TRPV1;TRPV1;TRPV1              | 0.000955793 | -0.304736946 |
| cg08699270 | LRP1                                 | 0.000290372 | -0.304764189 |
| cg12377401 |                                      | 0.003734675 | -0.304771296 |
| cg02167757 | SIAH1;SIAH1                          | 0.001376172 | -0.304773944 |
| cg00359395 | HSPG2                                | 0.003734675 | -0.304784889 |
| cg16051561 | CTNND2                               | 0.002304201 | -0.304822237 |
| cg03737424 |                                      | 0.001639597 | -0.304822269 |
| cg01403532 | LOC652276                            | 9.24E-05    | -0.304826835 |
| cg19426625 | ASAP2;ASAP2                          | 0.003189589 | -0.304834803 |
| cg23433118 |                                      | 0.009066563 | -0.304879521 |
| cg11203293 |                                      | 0.001147425 | -0.304972643 |
| cg04355222 | CD81                                 | 0.005897668 | -0.304996254 |
| cg18825221 | RAD51L1;RAD51L1;RAD51L1              | 3.34E-05    | -0.304998802 |
| cg24074448 | KLHL26                               | 0.000654035 | -0.305002247 |
| cg18291664 | PRKAR1B;PRKAR1B;PRKAR1B;PRKAR1B;PRK  | 0.001639597 | -0.305046406 |
| cg05075308 | IRF2                                 | 0.002304201 | -0.305052946 |
| cg22546748 |                                      | 4.34E-05    | -0.305086908 |
| cg17419731 | MIR589;FBXL18                        | 0.00043997  | -0.305097874 |
| cg27285056 | NAPSA;NAPSA                          | 0.002304201 | -0.305110245 |
| cg08753560 |                                      | 0.003734675 | -0.305163441 |
| cg23679982 | SMYD4                                | 0.000357885 | -0.305176341 |
| cg07103517 | IKZF1                                | 0.000148457 | -0.305178167 |
| cg07893474 | C3orf43                              | 0.000148457 | -0.30523413  |
| cg14391240 |                                      | 0.000537905 | -0.30527117  |
| cg17088007 | KCTD17                               | 0.000654035 | -0.305284137 |
| cg09577144 | DNAH17                               | 4.34E-05    | -0.305320929 |
| cg27462475 | DOCK9;DOCK9                          | 0.002714607 | -0.305337506 |
| cg26910870 | PRKCZ;PRKCZ;PRKCZ                    | 0.000791389 | -0.305452095 |
| cg06720722 | TP63;TP63;TP63                       | 0.003486652 | -0.305511807 |
| cg05725940 | GSDMB;GSDMB;GSDMB;GSDMB              | 4.34E-05    | -0.305513202 |
| cg07570113 | LOC644649                            | 0.000148457 | -0.305514133 |
| cg12041266 | ARRB1;ARRB1                          | 0.000233422 | -0.305525701 |
| cg14969094 |                                      | 1.96E-05    | -0.305529209 |
| cg04624413 | NKX6-3                               | 0.00043997  | -0.305596942 |
| cg12571629 |                                      | 0.000290372 | -0.30563581  |
| cg17545652 | PFKFB3;PFKFB3                        | 1.50E-05    | -0.305691618 |
| cg03974193 | MAP4K4;MAP4K4;MAP4K4                 | 0.003734675 | -0.305771117 |
| cg08489478 | ZFYVE27;ZFYVE27;ZFYVE27              | 0.002304201 | -0.305793855 |

|            |                                     |             |              |
|------------|-------------------------------------|-------------|--------------|
| cg27457191 | PHTF2;PHTF2                         | 0.001639597 | -0.305810651 |
| cg22311403 | MLLT4;MLLT4;MLLT4                   | 0.005897668 | -0.305814629 |
| cg02082273 | AMPD3                               | 7.23E-05    | -0.305964364 |
| cg04872675 |                                     | 0.000187194 | -0.305972804 |
| cg06889348 |                                     | 0.000187194 | -0.306003317 |
| cg07431973 | FRMD6;FRMD6                         | 0.000654035 | -0.306076755 |
| cg13691961 | DUSP6;DUSP6                         | 9.24E-05    | -0.306115073 |
| cg20460514 | LPIN1                               | 0.000117986 | -0.306158354 |
| cg06538771 | TRABD                               | 0.005897668 | -0.306214586 |
| cg12355172 | ACY3                                | 0.000187194 | -0.306263387 |
| cg27223728 |                                     | 0.001639597 | -0.306354821 |
| cg18690282 | TRIO                                | 0.000955793 | -0.306355529 |
| cg18515868 | MAEA;MAEA                           | 0.001376172 | -0.306370834 |
| cg22717593 |                                     | 0.000117986 | -0.306394175 |
| cg02343604 | ID3                                 | 7.23E-05    | -0.306571257 |
| cg19103609 | PKN1                                | 0.001147425 | -0.3065821   |
| cg17501982 | NCK2;NCK2                           | 0.000791389 | -0.306614537 |
| cg23804842 | ZNF705A;ZNF705A                     | 0.006823935 | -0.306631776 |
| cg09199562 |                                     | 0.001376172 | -0.306682802 |
| cg09100014 | IRF8                                | 0.000148457 | -0.306695614 |
| cg11267546 | HOXA3                               | 0.004357816 | -0.306751027 |
| cg18773597 |                                     | 1.50E-05    | -0.306828637 |
| cg07974504 | SPEG                                | 0.001376172 | -0.306850644 |
| cg17934775 | CHD2;CHD2                           | 3.34E-05    | -0.306893732 |
| cg05213414 |                                     | 0.000955793 | -0.306958173 |
| cg15806569 |                                     | 0.000791389 | -0.307024059 |
| cg11042320 | PDGFRB                              | 0.000791389 | -0.307027702 |
| cg15055553 | FBXL14                              | 0.003734675 | -0.307144453 |
| cg03309308 |                                     | 4.34E-05    | -0.30727165  |
| cg14943796 | BAHCC1                              | 0.001147425 | -0.307286881 |
| cg10356204 | JSRP1                               | 0.000117986 | -0.307295301 |
| cg07219303 | ADH6;ADH6                           | 0.005897668 | -0.30735576  |
| cg21111416 | HLTF;HLTF                           | 0.005897668 | -0.307356179 |
| cg00018184 | S100A3                              | 0.000148457 | -0.307369645 |
| cg23627828 |                                     | 2.58E-05    | -0.307374975 |
| cg16774528 | NIN;NIN;NIN;NIN                     | 0.0050758   | -0.30737535  |
| cg18406924 | RPTOR;RPTOR                         | 0.000357885 | -0.307379037 |
| cg21055910 | ELFN2                               | 0.000290372 | -0.307491711 |
| cg14554017 | CCDC40                              | 0.001376172 | -0.30755871  |
| cg00181849 | LMF1                                | 0.005897668 | -0.307612181 |
| cg06330289 |                                     | 0.004357816 | -0.307653419 |
| cg24255327 | ARHGEF10                            | 0.00043997  | -0.307670634 |
| cg06710694 | AP1B1;AP1B1;SNORD125;AP1B1          | 0.000955793 | -0.307717796 |
| cg20655334 |                                     | 0.006823935 | -0.307815835 |
| cg10246448 | ATP8B2;ATP8B2                       | 0.00043997  | -0.307860916 |
| cg15059065 | NR2F6                               | 0.003189589 | -0.307868932 |
| cg04085571 | LSP1                                | 0.009066563 | -0.307899706 |
| cg06398881 |                                     | 0.000290372 | -0.308014982 |
| cg04233537 |                                     | 0.00043997  | -0.308083167 |
| cg10825847 | CASP5;CASP5;CASP5;CASP5;CASP5;CASP5 | 0.000654035 | -0.308087497 |
| cg02484343 | E4F1                                | 0.007873393 | -0.308126398 |
| cg17658568 | LOC399959                           | 0.001948248 | -0.308154531 |
| cg10582860 |                                     | 4.34E-05    | -0.30840433  |
| cg27175112 |                                     | 0.002714607 | -0.308561794 |
| cg01837846 | KLHL29                              | 1.50E-05    | -0.308608961 |
| cg17269581 | TNFRSF13B                           | 0.000654035 | -0.308831656 |
| cg07757358 | LPP;FLJ42393                        | 0.003189589 | -0.308843614 |
| cg17320378 | FAM129C                             | 2.58E-05    | -0.308865378 |
| cg02208504 | ATP10A                              | 0.000233422 | -0.308900617 |
| cg26564960 |                                     | 0.000791389 | -0.308959821 |

|            |                             |             |              |
|------------|-----------------------------|-------------|--------------|
| cg08092966 |                             | 0.009066563 | -0.308994601 |
| cg24141382 | CTPS                        | 9.24E-05    | -0.309069178 |
| cg06767142 | MACROD1                     | 0.005897668 | -0.309110157 |
| cg24372256 | UMODL1;UMODL1;C21orf128     | 0.000187194 | -0.309147265 |
| cg03109660 | RELL1;RELL1                 | 0.000187194 | -0.309147519 |
| cg25279613 | OSBPL3;OSBPL3;OSBPL3;OSBPL3 | 0.000290372 | -0.309156395 |
| cg26169081 | CAMK1D;CAMK1D               | 5.59E-05    | -0.309184083 |
| cg15137213 | VPS53;VPS53                 | 9.24E-05    | -0.309315205 |
| cg13305415 | SPRY4;SPRY4                 | 0.000148457 | -0.309327754 |
| cg19046189 | HSD17B14                    | 5.59E-05    | -0.309365364 |
| cg21747070 |                             | 0.000148457 | -0.309378997 |
| cg16144314 | ADARB2                      | 0.000791389 | -0.30940734  |
| cg01028142 | CMPK2                       | 0.000537905 | -0.309452342 |
| cg22876356 | ELK3                        | 0.002304201 | -0.309483038 |
| cg09463220 |                             | 0.000955793 | -0.309506198 |
| cg04020713 | TENC1;TENC1;TENC1           | 0.000233422 | -0.309509094 |
| cg10169812 | CD38                        | 0.003189589 | -0.309525271 |
| cg07876162 | PALM;PALM                   | 0.000148457 | -0.309567032 |
| cg01104590 | CARS;CARS;CARS;CARS         | 1.50E-05    | -0.30960667  |
| cg11950754 | LRP8;LRP8;LRP8;LRP8         | 0.001147425 | -0.309639378 |
| cg03797660 | CBFA2T3                     | 0.000148457 | -0.309645852 |
| cg17994788 | C1GALT1                     | 0.002714607 | -0.309669752 |
| cg15345743 | RASSF3                      | 0.002304201 | -0.309746566 |
| cg00987918 | TRIM40                      | 3.34E-05    | -0.309762496 |
| cg04714939 | ZMIZ1                       | 0.002714607 | -0.309785801 |
| cg10231179 | DENND3                      | 0.000791389 | -0.30984967  |
| cg09946870 | DENND3                      | 0.0050758   | -0.309889691 |
| cg10730435 |                             | 9.24E-05    | -0.309895879 |
| cg25332502 | MBP;MBP                     | 0.000117986 | -0.30991173  |
| cg03670238 | WISP1;WISP1                 | 0.000955793 | -0.309956234 |
| cg23732024 | LY96                        | 9.24E-05    | -0.309990213 |
| cg09026568 | TRABD                       | 0.000187194 | -0.309997809 |
| cg13461482 | TCIRG1;TCIRG1               | 7.23E-05    | -0.310024197 |
| cg12936469 | C6orf59;AGPAT4              | 0.000654035 | -0.310071634 |
| cg27175380 |                             | 4.34E-05    | -0.310112111 |
| cg04719721 |                             | 0.000148457 | -0.31015534  |
| cg26974444 | SNX29                       | 0.001376172 | -0.31017955  |
| cg03661324 |                             | 0.000537905 | -0.310209061 |
| cg01113811 | MAML2                       | 0.00043997  | -0.310209373 |
| cg17516997 |                             | 0.000290372 | -0.310246854 |
| cg05321594 |                             | 0.001639597 | -0.310253526 |
| cg25916172 |                             | 2.58E-05    | -0.310268992 |
| cg05223100 | LHCGR                       | 0.000791389 | -0.310297254 |
| cg26394380 | SFTPBP;SFTPBP               | 4.34E-05    | -0.31031293  |
| cg00779313 | WDR37                       | 0.002714607 | -0.310341767 |
| cg08730070 | COMT;COMT;COMT              | 0.004357816 | -0.310375077 |
| cg00511632 | PXDN                        | 0.003189589 | -0.310403771 |
| cg06649165 | MAP1S                       | 0.000117986 | -0.310406301 |
| cg07437546 |                             | 5.59E-05    | -0.310446094 |
| cg16782719 | SLC15A4                     | 0.003734675 | -0.310501659 |
| cg04670451 | LOC100129637                | 0.009066563 | -0.310504809 |
| cg17884674 | CSNK1G2                     | 8.60E-06    | -0.310505447 |
| cg15773261 | GPR133                      | 0.000357885 | -0.31052929  |
| cg16201957 | MAML3                       | 1.11E-05    | -0.310567788 |
| cg19903805 | TC2N;TC2N                   | 4.34E-05    | -0.310580497 |
| cg18651347 | AUTS2;AUTS2                 | 0.005897668 | -0.310585678 |
| cg13366849 | DNM2;DNM2;DNM2;DNM2         | 0.001639597 | -0.310644102 |
| cg21964662 | RNF219                      | 0.003734675 | -0.310658106 |
| cg00562504 | DIP2C                       | 0.000537905 | -0.310673104 |
| cg22439922 |                             | 0.001376172 | -0.310679137 |

|            |                                       |             |              |
|------------|---------------------------------------|-------------|--------------|
| cg14592928 | ANGPT4                                | 0.001376172 | -0.31068823  |
| cg04685632 | KCNQ2;KCNQ2;KCNQ2;KCNQ2;KCNQ2         | 0.000791389 | -0.310815119 |
| cg04372535 | AP2A2                                 | 0.007873393 | -0.310825778 |
| cg25775449 | LTB4R;LTB4R;CIDEB                     | 7.23E-05    | -0.310854582 |
| cg13601957 |                                       | 0.000117986 | -0.310981539 |
| cg09918634 |                                       | 0.000187194 | -0.311145376 |
| cg24448870 | CHCHD6                                | 0.000290372 | -0.311150482 |
| cg18659586 | ASGR2;ASGR2;ASGR2;ASGR2               | 2.58E-05    | -0.311205482 |
| cg21320573 | UNC5D                                 | 0.001639597 | -0.311216069 |
| cg04225551 | GRHL2                                 | 0.000654035 | -0.311288664 |
| cg20145598 | SGTA                                  | 0.00043997  | -0.311297269 |
| cg21172497 | PCSK5                                 | 0.000148457 | -0.311331174 |
| cg00271311 | CNTF;ZFP91-CNTF                       | 4.34E-05    | -0.311340731 |
| cg05861879 | NUDT1;NUDT1;NUDT1;NUDT1;NUDT1;NUDT1   | 0.000233422 | -0.311343474 |
| cg23811811 | BMP2K;BMP2K                           | 0.00043997  | -0.311349334 |
| cg00566158 | PTPRN2;PTPRN2;PTPRN2                  | 4.34E-05    | -0.311401766 |
| cg23280720 | HECA                                  | 4.34E-05    | -0.311477332 |
| cg00860359 | PANX2;PANX2;PANX2                     | 0.00043997  | -0.31148096  |
| cg11076814 |                                       | 0.000537905 | -0.311507203 |
| cg26192520 | YWHAZ;YWHAZ;YWHAZ;YWHAZ;YWHAZ;YWH     | 0.003189589 | -0.311522577 |
| cg02450785 |                                       | 0.001639597 | -0.311548688 |
| cg27550441 | PARN;PARN                             | 5.59E-05    | -0.311611206 |
| cg04887078 | ADARB2                                | 0.001639597 | -0.311611522 |
| cg26785823 | LOC115110                             | 4.34E-05    | -0.311680434 |
| cg12002047 | FCER2                                 | 9.24E-05    | -0.311697153 |
| cg08367573 |                                       | 0.000187194 | -0.31173788  |
| cg24919348 | MIR599;VPS13B;VPS13B;MIR875           | 0.000148457 | -0.311751794 |
| cg20702417 | DNMT3A;DNMT3A;DNMT3A                  | 0.000148457 | -0.311844213 |
| cg16453673 | APPL2                                 | 0.006823935 | -0.311867992 |
| cg01503450 |                                       | 0.002304201 | -0.31186943  |
| cg17018896 | MAD1L1;MAD1L1;MAD1L1                  | 0.001376172 | -0.311871655 |
| cg08320989 |                                       | 0.001376172 | -0.311881659 |
| cg20914792 |                                       | 2.08E-05    | -0.311901954 |
| cg08949143 | LOC100188949                          | 2.58E-05    | -0.311980984 |
| cg04398180 | ADPRHL1;ADPRHL1;ADPRHL1               | 9.24E-05    | -0.312021958 |
| cg17396638 | FURIN                                 | 0.00043997  | -0.312079333 |
| cg20495365 | RGS12;RGS12;RGS12                     | 7.23E-05    | -0.312104318 |
| cg22634633 | SUNC1;SUNC1                           | 0.006823935 | -0.312140448 |
| cg16616918 | SMYD4                                 | 0.000187194 | -0.312178768 |
| cg04609875 | KCNMB4                                | 5.59E-05    | -0.312188686 |
| cg27551910 | BAIAP2;BAIAP2;BAIAP2;BAIAP2           | 4.34E-05    | -0.312261679 |
| cg10039504 | TSPAN9;TSPAN9                         | 0.001948248 | -0.312277869 |
| cg00113315 | SLC2A5;SLC2A5                         | 0.000955793 | -0.312357528 |
| cg01484915 | RASSF4                                | 0.000290372 | -0.312455143 |
| cg04195684 | MLC1;MLC1                             | 0.00043997  | -0.312459098 |
| cg24581795 | TNFRSF10B;TNFRSF10B;TNFRSF10B         | 0.000654035 | -0.312546276 |
| cg25551622 | CACNG1                                | 0.001147425 | -0.312616351 |
| cg00864684 |                                       | 0.000537905 | -0.312808949 |
| cg10753966 | ERC2                                  | 0.004357816 | -0.312818039 |
| cg14711743 | SERINC5                               | 0.000537905 | -0.312822423 |
| cg19274618 |                                       | 0.0050758   | -0.312866842 |
| cg04861974 |                                       | 0.000357885 | -0.312880002 |
| cg00648660 | RPTOR;RPTOR                           | 0.0050758   | -0.312913517 |
| cg00478326 |                                       | 7.23E-05    | -0.312991686 |
| cg26415789 | SEPT9;SEPT9;SEPT9;SEPT9;SEPT9;SEPT9;S | 9.24E-05    | -0.313035714 |
| cg04466743 | RIN2                                  | 0.000187194 | -0.313070236 |
| cg04677846 | C21orf33;C21orf33                     | 0.000537905 | -0.313122107 |
| cg06617335 | LOC91450                              | 0.000187194 | -0.313146196 |
| cg02211735 | OR52A4                                | 0.000290372 | -0.31315112  |
| cg09323092 | LMF1                                  | 0.007873393 | -0.313177868 |

|            |                                      |             |              |
|------------|--------------------------------------|-------------|--------------|
| cg14600368 |                                      | 0.000537905 | -0.313184959 |
| cg16318349 | PBXIP1                               | 0.001948248 | -0.313215071 |
| cg07155381 | RPH3AL                               | 0.006823935 | -0.313255015 |
| cg04339790 | EMP2                                 | 0.001639597 | -0.313255304 |
| cg18300008 |                                      | 0.000537905 | -0.313280456 |
| cg00706994 | OR5A2                                | 6.94E-05    | -0.313280593 |
| cg07376029 | GC                                   | 9.24E-05    | -0.313285769 |
| cg14537247 | DENND1A;DENND1A                      | 0.005897668 | -0.313321638 |
| cg09197783 | SLC43A3;SLC43A3;SLC43A3              | 0.001948248 | -0.313331583 |
| cg23786545 |                                      | 0.009066563 | -0.313423531 |
| cg09947611 | HCCA2                                | 0.004357816 | -0.313425576 |
| cg22361816 | COL11A2;COL11A2;COL11A2              | 4.34E-05    | -0.31345121  |
| cg06601266 | C10orf119                            | 1.50E-05    | -0.313477746 |
| cg11456838 | OSTCL                                | 0.000357885 | -0.313523002 |
| cg11955768 |                                      | 7.23E-05    | -0.313575911 |
| cg26244225 | APOLD1;APOLD1                        | 2.58E-05    | -0.313609592 |
| cg25256099 |                                      | 3.34E-05    | -0.313616476 |
| cg17168630 | PLAUR;PLAUR;PLAUR                    | 0.000791389 | -0.313627125 |
| cg16067628 | AATK                                 | 0.006823935 | -0.313679597 |
| cg20748242 | RNF44                                | 0.005897668 | -0.313698539 |
| cg00391031 | KIAA1274                             | 0.000654035 | -0.313710156 |
| cg09811510 | SCHIP1                               | 0.001948248 | -0.313725018 |
| cg12325605 | ARHGEF3;ARHGEF3;ARHGEF3              | 2.58E-05    | -0.313800559 |
| cg08796342 | TC2N                                 | 0.000791389 | -0.313860339 |
| cg06640997 |                                      | 0.006823935 | -0.313887607 |
| cg13361558 | PLEKHB1;PLEKHB1;PLEKHB1;PLEKHB1;PLEK | 7.23E-05    | -0.313998356 |
| cg08289350 | CYGB                                 | 1.96E-05    | -0.314099059 |
| cg06935608 |                                      | 0.000233422 | -0.314118432 |
| cg12491115 | APLP2;APLP2;APLP2;APLP2;APLP2;APLP2  | 7.23E-05    | -0.314129636 |
| cg09166898 | RHOV                                 | 0.004357816 | -0.314145018 |
| cg00334274 |                                      | 0.003189589 | -0.314173008 |
| cg16834011 | COMT                                 | 0.001948248 | -0.314216846 |
| cg21959598 | VOPP1                                | 0.003734675 | -0.314233926 |
| cg05995576 |                                      | 0.000654035 | -0.314251995 |
| cg11706849 | MGAT5                                | 0.000537905 | -0.314408557 |
| cg15903956 |                                      | 0.000233422 | -0.314422476 |
| cg02640147 | KCNIP1;KCNIP1;KCNIP1                 | 0.001376172 | -0.314472736 |
| cg10842314 | SH3TC1                               | 9.24E-05    | -0.314475584 |
| cg14381712 | VPS13D;VPS13D                        | 0.006823935 | -0.31454433  |
| cg14149774 | FAM69B                               | 0.001376172 | -0.314564611 |
| cg21940655 | MAD1L1;MAD1L1;MAD1L1                 | 0.00043997  | -0.314638244 |
| cg09221159 |                                      | 0.000148457 | -0.314656962 |
| cg25913761 | SEMA4B                               | 0.000148457 | -0.314708585 |
| cg03602500 | KIR3DX1                              | 0.001147425 | -0.31482979  |
| cg05831188 | SDK1                                 | 0.000187194 | -0.314833386 |
| cg05992079 | SIT1                                 | 1.96E-05    | -0.314841864 |
| cg25548350 |                                      | 0.003189589 | -0.315002021 |
| cg15549075 | PRKCE                                | 0.000654035 | -0.315003015 |
| cg06097077 | NLGN1                                | 0.001147425 | -0.315020942 |
| cg20000908 | MEGF6                                | 0.000654035 | -0.31502937  |
| cg25654695 | OAZ1                                 | 0.003189589 | -0.31505371  |
| cg27124512 | TRIM72;TRIM72                        | 0.000187194 | -0.315091954 |
| cg18173263 | PEMT;PEMT;PEMT                       | 1.96E-05    | -0.315128795 |
| cg20728490 | DNTT;DNTT;DNTT;DNTT                  | 2.58E-05    | -0.315192713 |
| cg12229364 | WWC2                                 | 0.000148457 | -0.315248588 |
| cg18915456 |                                      | 0.001147425 | -0.315264252 |
| cg13641082 | SNX8                                 | 0.000654035 | -0.315286425 |
| cg04091927 |                                      | 0.000187194 | -0.315331735 |
| cg01092108 |                                      | 0.000187194 | -0.315366856 |
| cg26021007 |                                      | 3.34E-05    | -0.315403248 |

|            |                                    |             |              |
|------------|------------------------------------|-------------|--------------|
| cg14344864 |                                    | 0.000148457 | -0.31542141  |
| cg06855137 | FAM38A                             | 0.00043997  | -0.315446089 |
| cg08177126 | DUSP22                             | 0.000791389 | -0.315477661 |
| cg07433178 | SYNPO;SYNPO                        | 0.000791389 | -0.315528224 |
| cg02319782 |                                    | 3.34E-05    | -0.315534384 |
| cg03631294 | CD79B;CD79B;CD79B                  | 4.34E-05    | -0.315556426 |
| cg04409030 | SOCS2                              | 0.000365373 | -0.315592488 |
| cg09158821 | SLC43A2                            | 0.000187194 | -0.315610499 |
| cg11580897 |                                    | 0.000955793 | -0.315651587 |
| cg00471368 | PLCG2                              | 0.004357816 | -0.315786469 |
| cg00073460 | ZC3H12D                            | 3.34E-05    | -0.31582099  |
| cg03033975 | GTPBP5                             | 9.24E-05    | -0.315867244 |
| cg01615861 |                                    | 4.34E-05    | -0.315896629 |
| cg00870449 | SLC8A1;SLC8A1;SLC8A1;SLC8A1        | 0.003734675 | -0.315982625 |
| cg26654771 | SORBS3                             | 0.000458355 | -0.316011285 |
| cg08287903 | UGT8                               | 0.000233422 | -0.316022936 |
| cg06517940 | LCK                                | 0.000158823 | -0.316032948 |
| cg07813254 | FAM43B                             | 0.000117986 | -0.316049261 |
| cg13300744 | CUX2                               | 0.000233422 | -0.316120235 |
| cg12551957 | FBXL18                             | 3.34E-05    | -0.316147804 |
| cg24405716 | MTMR10                             | 0.001639597 | -0.316178378 |
| cg06677021 | SERINC5                            | 4.34E-05    | -0.316270809 |
| cg14465801 |                                    | 5.59E-05    | -0.316300565 |
| cg00533183 | PSMB8;PSMB8                        | 0.000537905 | -0.316302607 |
| cg27043531 | FLJ22536                           | 1.50E-05    | -0.316304224 |
| cg05815436 |                                    | 0.000117986 | -0.316321987 |
| cg00546248 | PLCH2                              | 0.000233422 | -0.31632784  |
| cg15636295 | HBEGF                              | 0.000187194 | -0.316372133 |
| cg22478679 | ADPRHL1;ADPRHL1                    | 0.000357885 | -0.316412564 |
| cg05859076 | RAB43                              | 0.002227374 | -0.316440005 |
| cg26757820 | ADK;ADK                            | 0.000233422 | -0.316525814 |
| cg06539006 | CPO                                | 0.001639597 | -0.316571668 |
| cg18885162 | FOXP4;FOXP4;FOXP4                  | 0.000117986 | -0.316635464 |
| cg25958911 | BOP1                               | 0.003734675 | -0.316889012 |
| cg26687670 | OPN3                               | 0.003189589 | -0.316904597 |
| cg06959205 | CBFA2T3;CBFA2T3                    | 4.34E-05    | -0.316908028 |
| cg00797286 |                                    | 0.000791389 | -0.316948608 |
| cg23533000 |                                    | 1.96E-05    | -0.317028161 |
| cg08854834 | C21orf7                            | 0.001948248 | -0.317054726 |
| cg12157387 | PARD3B;PARD3B;PARD3B               | 0.001376172 | -0.317086072 |
| cg25308562 |                                    | 9.24E-05    | -0.317130469 |
| cg03095773 | RFX8                               | 0.000233422 | -0.317143643 |
| cg14043104 | KLF12                              | 0.000357885 | -0.317183864 |
| cg07457727 |                                    | 0.003734675 | -0.317222223 |
| cg16646298 | FLOT1                              | 0.000955793 | -0.317244137 |
| cg27443224 | CCL21;CCL21                        | 0.000117986 | -0.317300652 |
| cg27557782 |                                    | 9.24E-05    | -0.317331172 |
| cg18941322 |                                    | 5.59E-05    | -0.317354044 |
| cg23413497 |                                    | 0.000233422 | -0.317356577 |
| cg14275281 | PLCD3                              | 4.34E-05    | -0.317424748 |
| cg08246318 |                                    | 0.000791389 | -0.31744151  |
| cg04641860 | HNRNPF;HNRNPF;HNRNPF;HNRNPF;HNRNPF | 0.003189589 | -0.317460567 |
| cg11036672 | C4orf23                            | 0.000290372 | -0.317478925 |
| cg26687842 | LOC646982;LOC646982;LOC646982      | 3.34E-05    | -0.31748004  |
| cg21708145 | LOC154449                          | 0.004357816 | -0.317510932 |
| cg20821314 | PDIA6                              | 0.000117986 | -0.317522426 |
| cg05647602 | BID;BID                            | 0.000654035 | -0.317570176 |
| cg05892024 | PDGFA;PDGFA                        | 0.003734675 | -0.317620679 |
| cg08669954 | IFT140                             | 0.009066563 | -0.31764099  |
| cg24710671 | C21orf2                            | 0.000791389 | -0.317643009 |

|            |                            |             |              |
|------------|----------------------------|-------------|--------------|
| cg16150435 | C6orf15                    | 7.23E-05    | -0.31764553  |
| cg01632562 |                            | 0.000791389 | -0.3177404   |
| cg05799596 |                            | 0.001639597 | -0.317835464 |
| cg21901847 | NOS3                       | 0.001639597 | -0.31786325  |
| cg04637506 | LRRC43;LRRC43              | 0.002304201 | -0.317892872 |
| cg05754179 |                            | 0.004357816 | -0.317927173 |
| cg11870455 |                            | 1.96E-05    | -0.317937315 |
| cg17169037 | KDM2B;KDM2B                | 0.0050758   | -0.317993301 |
| cg02736966 |                            | 0.000955793 | -0.318069486 |
| cg21484631 | UHRF1;UHRF1                | 3.34E-05    | -0.318091308 |
| cg09989938 | CD19                       | 0.003734675 | -0.318114594 |
| cg08268075 | INSC                       | 0.000537905 | -0.318117235 |
| cg04511619 | ZNF423                     | 0.001948248 | -0.318169841 |
| cg18897335 | OSBPL5;OSBPL5;OSBPL5       | 0.001147425 | -0.318170874 |
| cg01495363 | LOC100287216;SH3RF3        | 0.001376172 | -0.318257692 |
| cg21969795 | TMEM88                     | 9.24E-05    | -0.318261253 |
| cg08279097 | DCLRE1B                    | 0.002304201 | -0.318270105 |
| cg09071834 |                            | 0.000955793 | -0.318290723 |
| cg11408632 |                            | 0.000357885 | -0.318361861 |
| cg06705947 | CUX2                       | 2.58E-05    | -0.318408784 |
| cg21448167 | TSPAN9;TSPAN9              | 0.0050758   | -0.318517744 |
| cg06448249 | CD79A;CD79A                | 0.001376172 | -0.31869766  |
| cg01493678 | HLA-DOB                    | 0.002714607 | -0.318782399 |
| cg19480385 |                            | 4.34E-05    | -0.318805839 |
| cg11434671 | CYGB                       | 3.34E-05    | -0.318838999 |
| cg22623319 | RBM20                      | 0.000537905 | -0.318889059 |
| cg25474235 | PRAGMIN                    | 3.34E-05    | -0.318969287 |
| cg05970307 | KIAA1191;KIAA1191;KIAA1191 | 0.000357885 | -0.319077058 |
| cg09730735 | LRRC2;LRRC2                | 0.001639597 | -0.319080224 |
| cg02084553 |                            | 0.002714607 | -0.31911217  |
| cg27067040 | C6orf59;AGPAT4             | 0.000955793 | -0.319132125 |
| cg01099825 | COBRA1                     | 4.34E-05    | -0.319169335 |
| cg07057617 |                            | 0.005897668 | -0.31922397  |
| cg13842421 | GPR133                     | 0.001376172 | -0.319235455 |
| cg07241457 |                            | 0.002714607 | -0.319245605 |
| cg20592017 |                            | 0.004357816 | -0.319389912 |
| cg06549275 | ASAP2;ASAP2                | 4.34E-05    | -0.319423627 |
| cg22898082 | SMARCA4;SMARCA4;SMARCA4    | 5.59E-05    | -0.319439972 |
| cg11659652 | PTPRE                      | 0.000955793 | -0.319448299 |
| cg05057352 | XYLT1                      | 0.001948248 | -0.319518015 |
| cg09698826 | HIVEP1                     | 0.002714607 | -0.319553715 |
| cg20698113 | PIM3                       | 0.001147425 | -0.319664931 |
| cg07213487 | TRRAP                      | 0.007873393 | -0.319673646 |
| cg16098340 | MIR548C;RASSF3             | 0.00043997  | -0.319719791 |
| cg00599809 | POM121                     | 0.002714607 | -0.319729736 |
| cg01577029 |                            | 0.000654035 | -0.319813595 |
| cg25916135 |                            | 0.001147425 | -0.319853088 |
| cg07992659 | BMPER                      | 0.000791389 | -0.319854133 |
| cg19622623 | RASSF9                     | 0.000148457 | -0.319886168 |
| cg07420333 | LGR5                       | 0.000187194 | -0.319900406 |
| cg00962740 | SDCCAG8                    | 0.000537905 | -0.319990977 |
| cg00525508 | ADARB2                     | 0.00043997  | -0.320032199 |
| cg00115458 | COL11A2;COL11A2;COL11A2    | 7.23E-05    | -0.320100271 |
| cg12421110 | C13orf15                   | 0.001376172 | -0.320187533 |
| cg24060317 | CLSTN1;CLSTN1              | 0.002304201 | -0.320208401 |
| cg21097504 |                            | 7.23E-05    | -0.320237519 |
| cg16947583 | GULP1                      | 3.34E-05    | -0.320288864 |
| cg22614400 | GIGYF1                     | 0.006823935 | -0.32033866  |
| cg21486834 | RHBDF2;RHBDF2              | 0.0050758   | -0.320387758 |
| cg22485298 | DDR1;DDR1                  | 5.59E-05    | -0.320419485 |



|            |                                       |             |              |
|------------|---------------------------------------|-------------|--------------|
| cg21627202 | PLXNB2                                | 2.58E-05    | -0.320446095 |
| cg27123351 | ALDH3B2;ALDH3B2                       | 0.002714607 | -0.320522474 |
| cg22372194 |                                       | 0.000290372 | -0.320568099 |
| cg25198661 | ODZ4                                  | 0.000955793 | -0.320570842 |
| cg15582102 |                                       | 0.009066563 | -0.320591454 |
| cg06612130 |                                       | 4.34E-05    | -0.320645398 |
| cg06762457 | ZC3H12D                               | 7.23E-05    | -0.320736748 |
| cg26686009 | C10orf25;ZNF22                        | 4.34E-05    | -0.320743466 |
| cg00071012 |                                       | 0.006823935 | -0.320766773 |
| cg15775674 | CAPN3;CAPN3;CAPN3;CAPN3;CAPN3;CAPN3   | 0.002304201 | -0.320797669 |
| cg01420564 | OSBPL6                                | 0.000290372 | -0.320807802 |
| cg22724943 | MAN1C1                                | 9.24E-05    | -0.320837094 |
| cg26341831 | TMEM63A                               | 0.00043997  | -0.320843993 |
| cg25206071 | IL19;IL19                             | 0.000187194 | -0.320883746 |
| cg18007757 |                                       | 0.002304201 | -0.320892156 |
| cg02796939 | FOXK2                                 | 0.000187194 | -0.320909848 |
| cg01808849 | MYO10                                 | 0.003734675 | -0.320928579 |
| cg18121565 | RMND1                                 | 0.007873393 | -0.320954632 |
| cg03512076 |                                       | 0.0050758   | -0.321062293 |
| cg07906046 | ADCY9                                 | 5.59E-05    | -0.32106427  |
| cg06513247 | SEPT9;SEPT9;SEPT9;SEPT9;SEPT9;SEPT9;S | 1.96E-05    | -0.321076044 |
| cg10426318 | KIAA1949;KIAA1949                     | 2.58E-05    | -0.321116168 |
| cg09208331 |                                       | 4.34E-05    | -0.321315973 |
| cg20283221 | FYTDD1;KIAA0226;FYTDD1                | 0.001376172 | -0.321337199 |
| cg20376123 | CELSR1                                | 2.58E-05    | -0.321380368 |
| cg01801603 | ZHX2                                  | 5.59E-05    | -0.321424311 |
| cg26747517 | ANKRD11                               | 0.000654035 | -0.321472148 |
| cg22137572 | CDH18;CDH18                           | 0.000148457 | -0.321546836 |
| cg15549637 | ATXN7L1;ATXN7L1                       | 0.000955793 | -0.321674399 |
| cg26307814 | PIK3CD                                | 0.003734675 | -0.321685279 |
| cg10270895 | PARD3                                 | 0.006823935 | -0.321711762 |
| cg05924882 |                                       | 0.000357885 | -0.321792897 |
| cg25838060 |                                       | 0.00043997  | -0.32190377  |
| cg05211356 | ACER2                                 | 0.000290372 | -0.321939095 |
| cg19273668 |                                       | 0.002714607 | -0.321991019 |
| cg11479568 | ANK1;ANK1;ANK1;ANK1;ANK1;ANK1;ANK1;AN | 0.000233422 | -0.322013431 |
| cg20856497 | CSNK1D;CSNK1D                         | 4.34E-05    | -0.322020767 |
| cg06453088 | CRMP1;CRMP1                           | 0.000117986 | -0.322055517 |
| cg06810986 |                                       | 0.000654035 | -0.32209961  |
| cg04023226 | CYGB;PRCD                             | 0.000955793 | -0.322134489 |
| cg05480110 | MUC4;MUC4;MUC4                        | 0.006823935 | -0.322246073 |
| cg21476000 | HOXC4                                 | 0.000955793 | -0.322252562 |
| cg11873854 | LCN6                                  | 5.59E-05    | -0.322256138 |
| cg26706520 |                                       | 0.0050758   | -0.322288706 |
| cg22354363 | FGF19                                 | 0.007873393 | -0.322308561 |
| cg13801057 |                                       | 0.002714607 | -0.322311707 |
| cg08679800 |                                       | 0.002714607 | -0.322317553 |
| cg03655684 | CLCN7;CLCN7                           | 0.009066563 | -0.322423569 |
| cg07322003 |                                       | 0.000654035 | -0.322429409 |
| cg27595127 |                                       | 0.000791389 | -0.322574984 |
| cg18814227 | SESTD1                                | 0.003189589 | -0.322621438 |
| cg07696514 | IKBKB                                 | 0.000233422 | -0.322702063 |
| cg09985802 | LHPP;LHPP                             | 2.58E-05    | -0.322711801 |
| cg04503912 | DSPP                                  | 0.001376172 | -0.322750531 |
| cg06343686 | KLHL30                                | 0.001147425 | -0.32277472  |
| cg24049888 | POU2AF1;POU2AF1                       | 8.60E-06    | -0.322874089 |
| cg10547908 | FAM174B                               | 0.000187194 | -0.322890998 |
| cg20594765 | GALNT2                                | 5.59E-05    | -0.322900796 |
| cg20682563 | TCF7;TCF7;TCF7;TCF7;TCF7;TCF7;TCF7    | 9.24E-05    | -0.323046153 |
| cg24093176 | PAPLN                                 | 0.000117986 | -0.323159824 |

|            |                                    |             |              |
|------------|------------------------------------|-------------|--------------|
| cg11182965 | TXNRD2                             | 4.34E-05    | -0.323192296 |
| cg23009067 | GNA12                              | 0.001147425 | -0.323207612 |
| cg23314514 |                                    | 0.001376172 | -0.323219652 |
| cg18158438 | SLC22A11                           | 1.96E-05    | -0.323235685 |
| cg16618789 |                                    | 0.000117986 | -0.323525606 |
| cg21142904 | KIRREL                             | 0.000955793 | -0.323663025 |
| cg03361664 | OSBPL5;OSBPL5;OSBPL5               | 0.00043997  | -0.323677368 |
| cg00540464 |                                    | 0.000791389 | -0.323681015 |
| cg15174682 | KDM4B                              | 0.000357885 | -0.323851406 |
| cg09373727 | PTP4A2;PTP4A2                      | 0.000148457 | -0.323901151 |
| cg16652347 | PLXNA4;PLXNA4;PLXNA4               | 0.005897668 | -0.323943435 |
| cg26973018 | ZNRF1                              | 0.000148457 | -0.323991639 |
| cg04820679 | COL11A2;COL11A2;COL11A2            | 0.000233422 | -0.324076663 |
| cg08623942 | SMURF1;SMURF1                      | 0.001376172 | -0.324139167 |
| cg15816503 | C8orf74                            | 7.23E-05    | -0.32415859  |
| cg25597976 | UBE2W;UBE2W                        | 0.00043997  | -0.324168337 |
| cg06071246 | SLC7A5                             | 0.000290372 | -0.324222544 |
| cg01616628 | BCL11A;BCL11A;BCL11A               | 0.000537905 | -0.32428036  |
| cg15995075 | TRPC1                              | 0.001147425 | -0.324316826 |
| cg19750657 | UFM1                               | 0.000537905 | -0.324327896 |
| cg00617975 | C22orf40                           | 0.00043997  | -0.32439401  |
| cg16432031 | DHRS3                              | 0.009066563 | -0.324409043 |
| cg15900221 | ARHGEF16                           | 0.000955793 | -0.324409345 |
| cg09432758 | TCF3;TCF3                          | 0.000148457 | -0.324421623 |
| cg06720713 |                                    | 0.000955793 | -0.324463637 |
| cg24863175 | PLA2G4A                            | 0.000290372 | -0.324486309 |
| cg08754149 | C10orf11                           | 0.000654035 | -0.324494492 |
| cg15487646 |                                    | 5.59E-05    | -0.324530459 |
| cg14341467 | GRK5                               | 0.000537905 | -0.32454749  |
| cg21908828 | KIAA0922;KIAA0922                  | 0.000537905 | -0.324563523 |
| cg07986058 | ATP10A                             | 5.59E-05    | -0.324570671 |
| cg23251296 | CD79B;CD79B;CD79B                  | 0.002266401 | -0.32464857  |
| cg01279933 | ATG4D;KRI1                         | 1.96E-05    | -0.324659013 |
| cg06021990 | FLT1                               | 9.24E-05    | -0.324682243 |
| cg15038286 | GATA2;GATA2;GATA2                  | 0.002304201 | -0.324715352 |
| cg27244242 | LY6G5C                             | 0.003189589 | -0.324747041 |
| cg17701942 | STX5                               | 0.000357885 | -0.324751608 |
| cg21831463 |                                    | 5.59E-05    | -0.324783058 |
| cg26471398 | TRAPPC9;TRAPPC9                    | 0.000148457 | -0.324786673 |
| cg21578050 | SEMA6A                             | 0.006823935 | -0.324814269 |
| cg27616666 |                                    | 0.005897668 | -0.324820277 |
| cg25136988 | LY6G5C                             | 0.001147425 | -0.324857899 |
| cg13213814 | MYEOV                              | 0.000290372 | -0.324921633 |
| cg08901339 | BLNK;BLNK;BLNK;BLNK                | 3.34E-05    | -0.324956037 |
| cg05163268 |                                    | 0.004357816 | -0.324976015 |
| cg03160526 | B3GNTL1                            | 2.58E-05    | -0.325016253 |
| cg22199118 | C8orf34;C8orf34                    | 4.34E-05    | -0.325056285 |
| cg07620544 | TRIM72;TRIM72                      | 0.000233422 | -0.325083413 |
| cg24721309 | ATP11A;ATP11A                      | 0.001147425 | -0.325085706 |
| cg24033471 | CACNA1C;CACNA1C;CACNA1C;CACNA1C;CA | 9.24E-05    | -0.325111625 |
| cg27427054 | SUV420H2                           | 0.000654035 | -0.325199437 |
| cg21705505 | C21orf33;C21orf33                  | 0.000955793 | -0.32534297  |
| cg10829004 | RTN1;RTN1                          | 0.002714607 | -0.325363053 |
| cg24556382 | GALNT7                             | 7.23E-05    | -0.325387378 |
| cg09408937 | CYFIP1                             | 0.007873393 | -0.325462947 |
| cg18809947 | PBX2                               | 0.001639597 | -0.325524338 |
| cg26256901 |                                    | 9.24E-05    | -0.325559022 |
| cg23751110 |                                    | 0.003734675 | -0.32560163  |
| cg07324172 | FBXW7;FBXW7;FBXW7                  | 0.007873393 | -0.325627876 |
| cg02162605 | C2orf85                            | 5.59E-05    | -0.325687821 |

|            |                                     |             |              |
|------------|-------------------------------------|-------------|--------------|
| cg20150640 | C1orf213;C1orf213;C1orf213;ZNF436   | 0.000187194 | -0.325730674 |
| cg25952596 |                                     | 0.001948248 | -0.325740037 |
| cg16549994 |                                     | 0.000357885 | -0.325760523 |
| cg14569771 |                                     | 5.59E-05    | -0.325805485 |
| cg09314803 | AZI1;AZI1                           | 0.005897668 | -0.325816437 |
| cg20837332 | KCNK7;KCNK7;KCNK7;KCNK7             | 0.000290372 | -0.325841203 |
| cg18551531 | LSM7                                | 0.000148457 | -0.325921283 |
| cg07262457 |                                     | 0.000148457 | -0.325925056 |
| cg08428949 | TTBK2                               | 4.34E-05    | -0.325925603 |
| cg05358758 | KRT71                               | 0.000290372 | -0.325947909 |
| cg15685223 |                                     | 0.007873393 | -0.326009241 |
| cg26808154 | MORN1;LOC100129534                  | 0.000233422 | -0.32604546  |
| cg25865542 | CMTM7;CMTM7                         | 0.000148457 | -0.326075339 |
| cg01008894 | RGS12;RGS12                         | 0.000117986 | -0.326100324 |
| cg11746924 | CD79B;CD79B;CD79B                   | 3.34E-05    | -0.32621394  |
| cg13109410 | GPR44                               | 0.001376172 | -0.326225586 |
| cg11075561 |                                     | 0.000791389 | -0.326237457 |
| cg19445335 | ADAP1                               | 0.001639597 | -0.326356135 |
| cg27660099 | EEDP1                               | 0.005897668 | -0.326395267 |
| cg12701674 |                                     | 0.000290372 | -0.326564495 |
| cg23729763 | APLP2;APLP2;APLP2;APLP2;APLP2;APLP2 | 7.23E-05    | -0.326575113 |
| cg02947125 |                                     | 4.34E-05    | -0.326579288 |
| cg07803420 | DDR1;DDR1                           | 4.34E-05    | -0.326652871 |
| cg07064537 | PLD1;PLD1                           | 0.001147425 | -0.326698339 |
| cg19913465 | FCER2                               | 0.000117986 | -0.326722459 |
| cg16946840 | MED12L                              | 0.001376172 | -0.326735818 |
| cg26738160 | RAPSN;RAPSN                         | 0.002304201 | -0.326858397 |
| cg14223485 | C9orf25                             | 0.003734675 | -0.326979047 |
| cg13502395 | KIAA1026;KIAA1026                   | 0.000955793 | -0.327049044 |
| cg00061805 | SQSTM1;SQSTM1;SQSTM1                | 0.001147425 | -0.327055855 |
| cg24947371 | GPR133                              | 0.000233422 | -0.32719239  |
| cg03048947 | LBR;LBR                             | 0.002304201 | -0.32726668  |
| cg06568490 | HDAC11;HDAC11                       | 0.000290372 | -0.327323468 |
| cg21169779 | NAIF1                               | 0.004357816 | -0.327351967 |
| cg04176122 | BCL9L                               | 2.58E-05    | -0.32737302  |
| cg26841040 | GUK1;GUK1;GUK1                      | 9.24E-05    | -0.327407043 |
| cg06156640 | ALLC                                | 0.001948248 | -0.327434266 |
| cg20739984 |                                     | 7.23E-05    | -0.327454201 |
| cg20595271 | SH2B3                               | 0.000791389 | -0.327480974 |
| cg01636910 | BCL10                               | 0.000654035 | -0.327490609 |
| cg19491207 | SNTG2                               | 0.000233422 | -0.327511765 |
| cg25117092 | MED12L;P2RY14;P2RY14                | 0.002304201 | -0.327513317 |
| cg04537282 |                                     | 1.50E-05    | -0.327516655 |
| cg03157862 |                                     | 0.000290372 | -0.327520215 |
| cg08126223 | RND1                                | 0.000117986 | -0.327542872 |
| cg01239922 | LRRC14B                             | 0.00043997  | -0.327561758 |
| cg18920397 | LY9;LY9                             | 2.58E-05    | -0.327566399 |
| cg02857726 | TM4SF1                              | 0.000537905 | -0.32757807  |
| cg16014060 | RAD51L1                             | 0.000187194 | -0.327677355 |
| cg18755226 | MXRA7;MXRA7;MXRA7                   | 0.001147425 | -0.327698118 |
| cg06595162 | NCRNA00114;NCRNA00114               | 0.003734675 | -0.327841816 |
| cg14821245 | CTNNA2;CTNNA2                       | 0.000187194 | -0.327852826 |
| cg07215697 | TULP4;TULP4                         | 0.000187194 | -0.328147597 |
| cg02003183 | CDC42BPB                            | 9.24E-05    | -0.328153085 |
| cg25152942 | MIA                                 | 0.001376172 | -0.328186518 |
| cg21195376 | PIK3C2B                             | 2.58E-05    | -0.328209942 |
| cg09208942 | PTGER2                              | 0.000654035 | -0.328259066 |
| cg04704634 | IL3                                 | 1.96E-05    | -0.328329157 |
| cg26733897 | RPTOR;RPTOR                         | 4.34E-05    | -0.328340998 |
| cg05932360 | JARID2                              | 1.96E-05    | -0.328348196 |

|            |                             |             |              |
|------------|-----------------------------|-------------|--------------|
| cg09445967 | ZP1                         | 5.59E-05    | -0.328435599 |
| cg04912778 | KCNMA1;KCNMA1;KCNMA1;KCNMA1 | 0.000290372 | -0.328438942 |
| cg13869484 | SLC2A5                      | 0.000654035 | -0.328535708 |
| cg13601739 | SLCO2B1;SLCO2B1;SLCO2B1     | 0.000357885 | -0.328543613 |
| cg02311864 | TNFRSF21                    | 0.000357885 | -0.328573887 |
| cg03556480 | IGFBP2                      | 0.0050758   | -0.328603779 |
| cg25350722 |                             | 0.001639597 | -0.328606971 |
| cg07877964 | USP7                        | 0.001376172 | -0.328618894 |
| cg26256521 |                             | 2.02E-05    | -0.328622616 |
| cg11654325 | C2orf85                     | 0.000357885 | -0.328627941 |
| cg03994959 | LIG4;LIG4;LIG4;LIG4         | 0.0050758   | -0.328702503 |
| cg15731920 | LASP1                       | 0.000290372 | -0.328717394 |
| cg09105687 | MMEL1                       | 1.96E-05    | -0.32877716  |
| cg04103532 | HIVEP2                      | 1.96E-05    | -0.328819305 |
| cg17359975 | CTGF                        | 0.007873393 | -0.328856144 |
| cg10464130 | KALRN;KALRN                 | 5.59E-05    | -0.328863524 |
| cg07996532 | ECE1                        | 2.58E-05    | -0.328930362 |
| cg15474337 | NAPSB                       | 1.96E-05    | -0.329000515 |
| cg04266474 | EEDP1                       | 0.002714607 | -0.329057547 |
| cg07236127 | TNNI1                       | 0.000955793 | -0.329058259 |
| cg26244575 |                             | 0.000654035 | -0.329125506 |
| cg01205058 |                             | 4.34E-05    | -0.32913986  |
| cg16530881 |                             | 5.59E-05    | -0.329182951 |
| cg08830576 | C16orf91                    | 0.000187194 | -0.329218453 |
| cg27635976 | CBFA2T3;CBFA2T3             | 0.007873393 | -0.329220852 |
| cg10481072 | CDK6;CDK6                   | 0.001948248 | -0.329255588 |
| cg01471006 | FAM190B                     | 0.001147425 | -0.329495893 |
| cg05124117 |                             | 0.003189589 | -0.329504156 |
| cg13628057 | EHMT1;EHMT1                 | 0.004357816 | -0.329534711 |
| cg26003455 |                             | 4.34E-05    | -0.32960769  |
| cg12781678 |                             | 0.002304201 | -0.329668658 |
| cg00792968 |                             | 0.009066563 | -0.329679003 |
| cg07800837 |                             | 0.001948248 | -0.32978521  |
| cg13020868 |                             | 0.000290372 | -0.329790142 |
| cg15630458 |                             | 0.000357885 | -0.329835849 |
| cg16100721 | TMEM123                     | 2.08E-05    | -0.32986595  |
| cg14443182 | DNAJB5;DNAJB5;DNAJB5        | 9.24E-05    | -0.329868653 |
| cg10445988 | MAD1L1;MAD1L1;MAD1L1        | 0.000357885 | -0.329884758 |
| cg15694146 |                             | 2.58E-05    | -0.329906789 |
| cg24112097 | BRD1                        | 0.001147425 | -0.329953071 |
| cg08859278 | ZAP70                       | 0.000233422 | -0.329992627 |
| cg00624799 | ZNF710                      | 0.000955793 | -0.330040658 |
| cg17004353 | CARS;CARS;CARS;CARS         | 2.58E-05    | -0.330110802 |
| cg22526990 |                             | 0.000791389 | -0.330121459 |
| cg04219504 | MEF2A;MEF2A;MEF2A           | 0.000148457 | -0.330130026 |
| cg17815933 | FOXJ2                       | 3.34E-05    | -0.330144403 |
| cg07826255 | SGCA;SGCA                   | 7.23E-05    | -0.330160445 |
| cg20379919 | THPO                        | 5.59E-05    | -0.330167633 |
| cg21435957 | FLOT1                       | 0.00043997  | -0.330218397 |
| cg08842021 | RUNX2;RUNX2;RUNX2           | 0.003189589 | -0.330233062 |
| cg02073763 | PRKCE                       | 5.59E-05    | -0.330329279 |
| cg14694744 | XIRP1                       | 0.006823935 | -0.330329626 |
| cg01176694 |                             | 0.000187194 | -0.330351427 |
| cg14174320 | PC;PC;PC                    | 0.000365373 | -0.330355149 |
| cg12577411 | DTNBP1;DTNBP1;DTNBP1        | 4.34E-05    | -0.330361928 |
| cg26479022 |                             | 5.59E-05    | -0.330379849 |
| cg13586425 | GPR133                      | 0.000148457 | -0.330470284 |
| cg06678005 |                             | 0.000117986 | -0.330526736 |
| cg10239022 | GPR133                      | 9.24E-05    | -0.330539469 |
| cg11601443 | OAS2;OAS2;OAS2              | 9.24E-05    | -0.330642046 |

|            |                                 |             |              |
|------------|---------------------------------|-------------|--------------|
| cg17701035 | CLEC17A                         | 0.000955793 | -0.330704767 |
| cg06770731 | SLC7A5                          | 0.000537905 | -0.330739897 |
| cg03270969 | C2orf85                         | 4.34E-05    | -0.330750039 |
| cg05921138 | SORL1                           | 0.001147425 | -0.330760804 |
| cg06821871 | CBFA2T3;CBFA2T3                 | 0.001147425 | -0.330782092 |
| cg17638507 |                                 | 3.34E-05    | -0.330789695 |
| cg04776489 | VPREB1                          | 5.59E-05    | -0.330873944 |
| cg07918080 |                                 | 0.000357885 | -0.330939791 |
| cg03372385 | LRRC16A                         | 0.000955793 | -0.331036014 |
| cg03990819 |                                 | 0.001948248 | -0.331045912 |
| cg02703190 | FAM172A;FAM172A;FAM172A;FAM172A | 0.007873393 | -0.331133046 |
| cg25315503 |                                 | 0.000187194 | -0.331135744 |
| cg10985158 | NAV1                            | 0.00043997  | -0.331252204 |
| cg09526469 | TRIO                            | 0.005897668 | -0.331365251 |
| cg20277740 | NPHP4                           | 0.001147425 | -0.331376829 |
| cg01192051 | POLG;POLG                       | 0.000357885 | -0.331392685 |
| cg00912580 | MGAT5                           | 1.96E-05    | -0.331467046 |
| cg19478079 |                                 | 0.000148457 | -0.331497715 |
| cg15602677 | SNTG2                           | 0.000290372 | -0.331519619 |
| cg18880986 | FBXL18                          | 0.000233422 | -0.331542079 |
| cg21028142 | NPLOC4                          | 0.003189589 | -0.331880145 |
| cg01373166 | ADORA2A                         | 8.60E-06    | -0.331910439 |
| cg00461022 | FAM134B                         | 0.000537905 | -0.331976107 |
| cg05703230 |                                 | 0.000290372 | -0.332067017 |
| cg07403350 | LIG4;LIG4;LIG4;LIG4             | 0.005897668 | -0.332080349 |
| cg11944933 | FAM167A                         | 0.001639597 | -0.332080394 |
| cg13861536 | KIAA1614                        | 1.96E-05    | -0.332093881 |
| cg13271206 | RPS3                            | 0.002304201 | -0.332156954 |
| cg19222784 | NAV2;NAV2;NAV2;NAV2             | 0.000233422 | -0.332201234 |
| cg00499539 | PSD4;LOC440839                  | 9.24E-05    | -0.332208072 |
| cg01764370 |                                 | 0.005897668 | -0.332308556 |
| cg23793965 | NECAB1                          | 4.34E-05    | -0.332450362 |
| cg01964170 |                                 | 0.002450672 | -0.332481811 |
| cg17742617 | PPM1H                           | 0.00043997  | -0.332528743 |
| cg24153714 | C10orf11                        | 0.000290372 | -0.332539577 |
| cg05515866 | FARP2                           | 0.000537905 | -0.332625131 |
| cg06559756 | PITPNC1;PITPNC1                 | 5.59E-05    | -0.332824335 |
| cg18499396 |                                 | 0.000537905 | -0.332870188 |
| cg08364772 |                                 | 0.000955793 | -0.332910566 |
| cg01400685 | FADS2                           | 0.002304201 | -0.332961685 |
| cg00323915 | GIMAP4                          | 0.000791389 | -0.333078978 |
| cg01741999 | PNKD                            | 4.34E-05    | -0.333110856 |
| cg08626131 | SEPP1;SEPP1;SEPP1               | 0.003189589 | -0.333205348 |
| cg07975634 | GJA5;GJA5;GJA5                  | 0.000148457 | -0.333306337 |
| cg13365436 | AP2A2                           | 0.001948248 | -0.333308356 |
| cg07422329 | PTGS2                           | 0.000187194 | -0.333320673 |
| cg24494102 | CNGA1                           | 0.000357885 | -0.333334784 |
| cg05021589 | LY86;LOC285780                  | 1.50E-05    | -0.333400017 |
| cg21855816 | C7orf50;C7orf50;C7orf50         | 0.0050758   | -0.333404448 |
| cg18103836 |                                 | 0.000148457 | -0.333425075 |
| cg24770256 | FOXK2                           | 0.003734675 | -0.333531132 |
| cg03722295 |                                 | 0.000290372 | -0.333542525 |
| cg17999642 | LY6G5C                          | 0.006823935 | -0.333575465 |
| cg25817639 | ODZ3                            | 0.000233422 | -0.333601682 |
| cg01523027 | ZNF799                          | 0.002304201 | -0.333620116 |
| cg04530852 | GTPBP5                          | 4.34E-05    | -0.333628973 |
| cg11224946 | MEGF6                           | 3.34E-05    | -0.333667437 |
| cg01147055 | RASA3                           | 0.0050758   | -0.333672933 |
| cg04447756 | MATR3;MATR3                     | 0.001639597 | -0.333741487 |
| cg25320816 | ADPRHL1;ADPRHL1                 | 0.000187194 | -0.333776896 |

|            |                                       |             |              |
|------------|---------------------------------------|-------------|--------------|
| cg07710335 | PMP22;PMP22;PMP22                     | 0.002304201 | -0.333792416 |
| cg12496975 | RAPGEF3;RAPGEF3;RAPGEF3               | 0.009066563 | -0.333816125 |
| cg20956114 | PTPRN2;PTPRN2;PTPRN2                  | 0.000791389 | -0.333851276 |
| cg12877853 | PTPRN2;PTPRN2;MIR595;PTPRN2           | 0.000148457 | -0.333871983 |
| cg01597784 |                                       | 0.002304201 | -0.333991857 |
| cg03347934 | C5orf56                               | 7.23E-05    | -0.334078528 |
| cg02471848 |                                       | 0.003734675 | -0.33408243  |
| cg10767662 | NFIX                                  | 0.0050758   | -0.334235914 |
| cg03605761 | RNF126                                | 0.000187194 | -0.334286968 |
| cg04398156 |                                       | 0.004357816 | -0.334302626 |
| cg03313126 | ALLC                                  | 0.003189589 | -0.334306145 |
| cg25673241 | RPTOR;RPTOR                           | 0.001147425 | -0.334313645 |
| cg08850729 | FGGY;FGGY                             | 3.34E-05    | -0.334319734 |
| cg10558740 | FLJ22536                              | 0.000791389 | -0.334410884 |
| cg09179248 | PRKCZ;PRKCZ;PRKCZ                     | 0.002304201 | -0.33442021  |
| cg02921257 | XIRP1                                 | 0.000537905 | -0.334444659 |
| cg12078154 | RPTOR;RPTOR                           | 0.00043997  | -0.334471505 |
| cg10035831 | RPTOR;RPTOR                           | 0.000365373 | -0.334480265 |
| cg10278213 | CBFA2T3;CBFA2T3                       | 0.002714607 | -0.334492866 |
| cg22321036 |                                       | 0.000148457 | -0.334547514 |
| cg21128953 | MTUS2;MTUS2                           | 0.001639597 | -0.334557304 |
| cg11362935 | POU2AF1                               | 8.60E-06    | -0.334567017 |
| cg00130947 | LAMA2;LAMA2                           | 9.24E-05    | -0.334584648 |
| cg00129811 | DSE;DSE                               | 3.34E-05    | -0.33460069  |
| cg00543073 | BCL11A;BCL11A;BCL11A                  | 0.001147425 | -0.334611196 |
| cg03358588 | KCNT1                                 | 0.002714607 | -0.334646289 |
| cg24307601 |                                       | 0.000117986 | -0.33473099  |
| cg03787282 |                                       | 4.34E-05    | -0.334748157 |
| cg07004075 | REC8;REC8                             | 0.001376172 | -0.334793471 |
| cg05079191 | ZNF804B;MGC26647                      | 0.003734675 | -0.334817953 |
| cg00741986 | TNIP2;TNIP2                           | 1.96E-05    | -0.33482763  |
| cg16706546 | IGF2BP2;IGF2BP2                       | 0.004131428 | -0.334839887 |
| cg15123742 | CSGALNACT1;CSGALNACT1;CSGALNACT1      | 0.000148457 | -0.334958372 |
| cg02948862 | CBFA2T3                               | 0.001639597 | -0.334970381 |
| cg24442766 | INADL                                 | 0.001948248 | -0.335019064 |
| cg04477962 | METTL7A                               | 0.001376172 | -0.335041083 |
| cg06524846 |                                       | 0.00043997  | -0.335046887 |
| cg15468423 | GNG7                                  | 0.000357885 | -0.335149922 |
| cg10816378 |                                       | 0.000148457 | -0.335170244 |
| cg10552473 |                                       | 0.003189589 | -0.335341037 |
| cg00033909 | PER4                                  | 4.34E-05    | -0.335370792 |
| cg06267718 | ELFN2                                 | 0.001147425 | -0.335385795 |
| cg27064845 | GLTSCR2                               | 0.000357885 | -0.335389404 |
| cg27457201 | RPTOR;RPTOR                           | 0.000654035 | -0.335436187 |
| cg01692626 | DYNC1H1                               | 0.002304201 | -0.335440929 |
| cg27627493 |                                       | 0.000187194 | -0.335446236 |
| cg00981070 | PRKCZ;PRKCZ;PRKCZ                     | 0.00043997  | -0.335583985 |
| cg07698793 |                                       | 0.002714607 | -0.335591659 |
| cg04781080 | CORO2B                                | 2.58E-05    | -0.335594389 |
| cg01297020 | DAOA;DAOA;DAOA                        | 4.34E-05    | -0.335604443 |
| cg07172334 | KRTAP24-1;KRTAP24-1                   | 4.34E-05    | -0.335606298 |
| cg19131667 | TBC1D5;TBC1D5;TBC1D5                  | 0.000187194 | -0.335614769 |
| cg01513063 | SEPT9;SEPT9;SEPT9;SEPT9;SEPT9;SEPT9;S | 0.000187194 | -0.335643938 |
| cg10247711 | WDR25;WDR25                           | 0.000148457 | -0.335682891 |
| cg27494470 |                                       | 0.00043997  | -0.335691171 |
| cg03737367 | MIR150                                | 0.00043997  | -0.335711999 |
| cg10959672 | KIAA0319L                             | 0.000791389 | -0.335823908 |
| cg09464728 | CYGB                                  | 0.000955793 | -0.335867274 |
| cg20892919 |                                       | 0.002714607 | -0.335910531 |
| cg26960322 | CXCR7                                 | 0.0050758   | -0.335915598 |

|            |                                         |             |              |
|------------|-----------------------------------------|-------------|--------------|
| cg26226408 | LOC646982;LOC646982;LOC646982           | 0.000233422 | -0.33593141  |
| cg03805182 | ZFH3;ZFH3                               | 0.000117986 | -0.335950801 |
| cg06487369 | SLC38A10;SLC38A10                       | 2.58E-05    | -0.336044114 |
| cg14651650 | OPA1;OPA1;OPA1;OPA1;OPA1;OPA1;OPA1;O    | 3.34E-05    | -0.336101664 |
| cg00861207 | ABLIM2;ABLIM2;ABLIM2;ABLIM2;ABLIM2;ABLI | 0.003189589 | -0.336130893 |
| cg02046475 | ELP3                                    | 0.000187194 | -0.336169741 |
| cg12661092 | SLIT1                                   | 0.000187194 | -0.336190993 |
| cg20146241 | RCAN3                                   | 1.11E-05    | -0.336239263 |
| cg08856268 | RPRD2                                   | 0.000955793 | -0.336264438 |
| cg24486958 |                                         | 0.000537905 | -0.336340955 |
| cg11108991 | KCNMB3;KCNMB3                           | 9.24E-05    | -0.336370574 |
| cg06242243 | NCOR2;NCOR2                             | 0.0050758   | -0.336398976 |
| cg00856825 | GHRL;GHRL;GHRL;GHRL;GHRL;GHRL;GHRL      | 0.009066563 | -0.336430673 |
| cg21518332 |                                         | 0.000290372 | -0.336438519 |
| cg16284674 | ZNF511;TUBGCP2                          | 0.004357816 | -0.336505649 |
| cg11177526 | PYHIN1;PYHIN1;PYHIN1;PYHIN1             | 0.001639597 | -0.336526046 |
| cg15375424 | IRF1                                    | 0.000654035 | -0.336539188 |
| cg10719144 |                                         | 0.002714607 | -0.336547297 |
| cg22680073 |                                         | 1.96E-05    | -0.336629398 |
| cg20901032 | CSNK1A1L                                | 7.23E-05    | -0.336878851 |
| cg17156862 | KLHDC7A                                 | 0.000187194 | -0.336972453 |
| cg04929543 | OSBPL6;OSBPL6                           | 0.006823935 | -0.337008427 |
| cg15168958 | FARP1                                   | 0.000955793 | -0.337037469 |
| cg19611013 |                                         | 0.003189589 | -0.337047169 |
| cg19519593 | PDE7A                                   | 0.000357885 | -0.337105869 |
| cg22926923 |                                         | 0.003734675 | -0.337129403 |
| cg11497377 | SFRS12;SFRS12                           | 7.23E-05    | -0.337171705 |
| cg02057305 |                                         | 0.000654035 | -0.337291369 |
| cg08217910 | TMEM37                                  | 9.24E-05    | -0.337317576 |
| cg26270263 |                                         | 0.001376172 | -0.337656272 |
| cg00443981 | C17orf64                                | 0.002304201 | -0.337678704 |
| cg08460812 | LOC641518;LEF1;LEF1;LEF1;LEF1           | 2.58E-05    | -0.337751657 |
| cg26797124 |                                         | 8.60E-06    | -0.337807772 |
| cg10426370 | ESM1;ESM1                               | 0.000233422 | -0.337811589 |
| cg03538922 | LOC100129637                            | 0.000233422 | -0.337852018 |
| cg08628269 |                                         | 0.00043997  | -0.337858094 |
| cg02690117 |                                         | 0.000537905 | -0.337905701 |
| cg26544722 |                                         | 5.59E-05    | -0.337945582 |
| cg25607670 | MFI2;MFI2                               | 1.96E-05    | -0.338141568 |
| cg21739584 | BCL6;BCL6;BCL6                          | 0.000187194 | -0.338142405 |
| cg17298005 | ELK3                                    | 0.004357816 | -0.33815823  |
| cg26969933 | C6orf47;BAT4                            | 0.000233422 | -0.338197491 |
| cg05246645 |                                         | 0.000187194 | -0.33819911  |
| cg27217350 | C2orf85                                 | 1.50E-05    | -0.338227    |
| cg18788890 | OR7C2                                   | 0.000117986 | -0.338264969 |
| cg22851561 | C14orf43;C14orf43                       | 0.000187194 | -0.338278391 |
| cg10491546 | CTBP2;CTBP2                             | 0.007873393 | -0.338294519 |
| cg17581870 | C7orf50;C7orf50;MIR339;C7orf50          | 0.003734675 | -0.338341311 |
| cg04918831 | CHML;CHML;OPN3                          | 0.009066563 | -0.338347772 |
| cg04583842 | BANP;BANP                               | 7.23E-05    | -0.338375211 |
| cg17442852 | SLC43A2                                 | 0.000233422 | -0.338423415 |
| cg16522993 |                                         | 0.000233422 | -0.338521598 |
| cg14341131 | KCNT1                                   | 0.001147425 | -0.33857202  |
| cg13849419 | TJP2;TJP2;TJP2;TJP2                     | 0.001376172 | -0.338575772 |
| cg04462378 | NUMA1                                   | 0.001376172 | -0.338643414 |
| cg16578549 | CTNNBIP1;CTNNBIP1                       | 0.000187194 | -0.338669729 |
| cg16828576 |                                         | 3.34E-05    | -0.338684218 |
| cg12434889 | PTPRN2;PTPRN2;PTPRN2                    | 0.000290372 | -0.338722628 |
| cg13388769 |                                         | 0.0050758   | -0.338732478 |
| cg13808842 |                                         | 0.000654035 | -0.338895106 |

|            |                                              |             |              |
|------------|----------------------------------------------|-------------|--------------|
| cg16171213 |                                              | 0.001376172 | -0.338907166 |
| cg13522882 | MAP4K4;MAP4K4;MAP4K4                         | 0.003734675 | -0.338919337 |
| cg03251852 | PRX;PRX                                      | 0.003734675 | -0.338940146 |
| cg20645966 |                                              | 6.94E-05    | -0.339012878 |
| cg17401720 | PTPRN2;PTPRN2;PTPRN2                         | 0.002714607 | -0.339165868 |
| cg10030250 | MMP2;MMP2                                    | 0.002304201 | -0.339259572 |
| cg18847118 |                                              | 4.34E-05    | -0.339308553 |
| cg03774957 |                                              | 0.000233422 | -0.339359892 |
| cg22319052 | SNX8                                         | 0.000233422 | -0.339378916 |
| cg07910529 | MAD1L1;MAD1L1;MAD1L1                         | 0.000187194 | -0.339381384 |
| cg14202937 | AMPD2;AMPD2;AMPD2                            | 0.009066563 | -0.339406085 |
| cg25318211 | MICAL1;MICAL1                                | 0.000117986 | -0.339424261 |
| cg07017242 | IMPDH1;IMPDH1;IMPDH1;IMPDH1;IMPDH1;IM        | 0.000148457 | -0.339528704 |
| cg13621396 | STIM2;STIM2;STIM2                            | 0.0050758   | -0.339650306 |
| cg05982473 | OSBPL5;OSBPL5;OSBPL5                         | 0.000537905 | -0.339659021 |
| cg17298510 | LRFN2                                        | 0.002304201 | -0.339680887 |
| cg26102517 |                                              | 0.000955793 | -0.339681517 |
| cg25422880 | TMEM163                                      | 0.000117986 | -0.33974382  |
| cg05900530 | WDR49                                        | 5.11E-05    | -0.339811174 |
| cg03318573 | NAA30                                        | 0.000117986 | -0.339820429 |
| cg05957567 | BCL7A;BCL7A                                  | 3.34E-05    | -0.339846202 |
| cg13935127 | RIMS3                                        | 0.002714607 | -0.339847724 |
| cg10997248 | FXD2                                         | 1.96E-05    | -0.339927839 |
| cg13458384 | SARDH;SARDH                                  | 0.000654035 | -0.339967811 |
| cg18745507 | ZGLP1                                        | 9.24E-05    | -0.34003107  |
| cg01113530 |                                              | 0.007873393 | -0.340050414 |
| cg20687098 | WIPF1;WIPF1                                  | 9.24E-05    | -0.340063748 |
| cg03283990 |                                              | 3.34E-05    | -0.34014799  |
| cg23047992 | CUX1;CUX1;CUX1                               | 0.000187194 | -0.340149256 |
| cg16462701 | CD81                                         | 0.003734675 | -0.340195461 |
| cg19851560 | SMYD1                                        | 0.000537905 | -0.340214365 |
| cg06771256 | CBFA2T3;CBFA2T3                              | 0.001376172 | -0.340247011 |
| cg04561791 |                                              | 3.34E-05    | -0.340277184 |
| cg23074762 | CHSY1                                        | 0.0050758   | -0.340316131 |
| cg04847110 |                                              | 0.000654035 | -0.340333824 |
| cg05720721 |                                              | 7.23E-05    | -0.340409234 |
| cg01935086 | IQCC;IQCC;DCDC2B                             | 0.000148457 | -0.340420386 |
| cg14765206 | DNMBP                                        | 0.000955793 | -0.340473287 |
| cg10451425 | ARMC5;ARMC5                                  | 5.59E-05    | -0.340523382 |
| cg18202741 | AQP6                                         | 0.000233422 | -0.340529799 |
| cg00511027 | C7orf50;C7orf50;MIR339;C7orf50               | 0.002714607 | -0.340568759 |
| cg04400533 | ETV5                                         | 7.23E-05    | -0.340583933 |
| cg20957428 | APOC3                                        | 5.59E-05    | -0.340584609 |
| cg24055836 | FAM190A;FAM190A                              | 0.000537905 | -0.340632315 |
| cg04731810 | HLTF;HLTF                                    | 0.000791389 | -0.340654507 |
| cg14170999 | BAHCC1                                       | 0.005897668 | -0.340665712 |
| cg06499213 | TRAF3IP2;TRAF3IP2;TRAF3IP2;TRAF3IP2;TRAF3IP2 | 0.005897668 | -0.34066606  |
| cg00889627 | GABRD                                        | 0.000654035 | -0.340672062 |
| cg09103979 | INPP5A                                       | 0.00043997  | -0.340674149 |
| cg14465207 | PDIA6                                        | 5.59E-05    | -0.340743133 |
| cg15704408 | NFATC1;NFATC1;NFATC1;NFATC1                  | 0.0050758   | -0.340768824 |
| cg14162361 |                                              | 0.001376172 | -0.340786568 |
| cg25546253 |                                              | 0.001376172 | -0.340827044 |
| cg03512414 | RIN2                                         | 0.004357816 | -0.340971086 |
| cg05809437 | DLGAP2                                       | 0.000654035 | -0.340985465 |
| cg02122920 | PTCRA                                        | 0.007873393 | -0.341025924 |
| cg13630239 | RRP12;RRP12                                  | 0.000233422 | -0.341065861 |
| cg05673966 |                                              | 0.000148457 | -0.341088142 |
| cg03345925 | ZC3H3                                        | 0.000290372 | -0.341142119 |
| cg06567829 | ANKRD11                                      | 0.002304201 | -0.341283363 |



|            |                                         |             |              |
|------------|-----------------------------------------|-------------|--------------|
| cg27485075 | LOC100134259                            | 7.23E-05    | -0.341336255 |
| cg14505616 | C18orf1;C18orf1                         | 0.000262362 | -0.341361153 |
| cg18482303 | MGAT5                                   | 0.000791389 | -0.341427145 |
| cg06484432 | ADAMTS19                                | 0.000654035 | -0.341437533 |
| cg21204860 | SEPT9;SEPT9;SEPT9;SEPT9;SEPT9;SEPT9     | 3.34E-05    | -0.341458367 |
| cg08384322 | C16orf46;C16orf46                       | 0.003189589 | -0.341463397 |
| cg08823240 | MAP3K14                                 | 7.23E-05    | -0.341556155 |
| cg13535736 | C9orf5                                  | 0.002304201 | -0.341581225 |
| cg05542646 |                                         | 0.003189589 | -0.341602548 |
| cg22372096 | ZFR2                                    | 2.58E-05    | -0.34171259  |
| cg01936091 | ABLIM2;ABLIM2;ABLIM2;ABLIM2;ABLIM2;ABLI | 0.005897668 | -0.341773635 |
| cg05626616 | SEPT9;SEPT9;SEPT9;SEPT9;SEPT9;SEPT9;S   | 0.000537905 | -0.341870771 |
| cg10089657 | C7orf50;MIR339;C7orf50;C7orf50          | 2.58E-05    | -0.341870852 |
| cg05863755 | TSPAN9;TSPAN9                           | 0.004357816 | -0.341937046 |
| cg22315903 | C21orf2                                 | 5.59E-05    | -0.342001958 |
| cg26692003 | IQSEC1                                  | 0.001147425 | -0.342081897 |
| cg09655520 | PRKCA                                   | 0.000357885 | -0.34209987  |
| cg18505871 | RNF44                                   | 5.59E-05    | -0.342122638 |
| cg13308743 |                                         | 0.000791389 | -0.342262432 |
| cg01830053 |                                         | 0.004357816 | -0.342263395 |
| cg21305315 | LRPAP1                                  | 0.000117986 | -0.34230739  |
| cg04623297 | RFX8                                    | 0.003189589 | -0.342316245 |
| cg00295485 | UXS1                                    | 4.34E-05    | -0.342327765 |
| cg03965138 | SIGLEC5                                 | 0.000187194 | -0.342360936 |
| cg09140232 |                                         | 0.000654035 | -0.342419997 |
| cg01966334 | MYO7B                                   | 4.34E-05    | -0.342435374 |
| cg17184479 | EXOC6;EXOC6                             | 0.000791389 | -0.342524017 |
| cg01643090 | CAMTA1                                  | 0.000791389 | -0.342560065 |
| cg26895622 |                                         | 0.006823935 | -0.342643642 |
| cg00088797 | IQSEC1;IQSEC1                           | 0.000117986 | -0.342659397 |
| cg16624891 | CTSB;CTSB;CTSB;CTSB;CTSB                | 0.001147425 | -0.342660129 |
| cg06070269 | GOT2                                    | 0.000148457 | -0.342660486 |
| cg19589800 | UBE2N                                   | 7.23E-05    | -0.342686631 |
| cg05567440 |                                         | 0.001948248 | -0.342724119 |
| cg26658743 |                                         | 9.24E-05    | -0.342792235 |
| cg11961495 | ZMIZ1                                   | 0.000233422 | -0.342826197 |
| cg16754216 |                                         | 0.004357816 | -0.34284862  |
| cg16715687 |                                         | 0.005897668 | -0.343030729 |
| cg18825594 | KLF11                                   | 0.001147425 | -0.343055925 |
| cg18165707 | DENND3                                  | 0.003189589 | -0.34308467  |
| cg10354512 | WISP1;WISP1                             | 0.003060839 | -0.343098723 |
| cg05386726 |                                         | 0.000357885 | -0.343126101 |
| cg19145398 | FOXS1                                   | 0.000233422 | -0.343139784 |
| cg08867471 |                                         | 0.00043997  | -0.343186145 |
| cg19641315 | P2RY6;P2RY6;P2RY6                       | 0.000187194 | -0.343201362 |
| cg14925764 |                                         | 0.002714607 | -0.343280814 |
| cg13488011 |                                         | 3.34E-05    | -0.343289858 |
| cg22020227 | OLFML3                                  | 0.000955793 | -0.343400714 |
| cg25644380 | BCL3                                    | 0.0050758   | -0.343411447 |
| cg06099971 | PLA2G4D                                 | 5.59E-05    | -0.343417767 |
| cg02294870 |                                         | 0.007873393 | -0.343476882 |
| cg23014759 | BCL9                                    | 0.000537905 | -0.343478017 |
| cg03064100 |                                         | 0.002266401 | -0.343571115 |
| cg22888023 | RPTOR;RPTOR                             | 0.004357816 | -0.343607172 |
| cg13647973 |                                         | 0.000290372 | -0.343621537 |
| cg14091154 | FRAS1;FRAS1                             | 0.000187194 | -0.343631143 |
| cg17494034 | VPS13D;VPS13D                           | 9.24E-05    | -0.343686875 |
| cg09940188 | SMYD4                                   | 0.00043997  | -0.343689555 |
| cg25643229 |                                         | 0.000148457 | -0.343747166 |
| cg04440811 | PRDM10;PRDM10;PRDM10;PRDM10             | 0.0050758   | -0.343794728 |

|            |                               |             |              |
|------------|-------------------------------|-------------|--------------|
| cg22799757 | SCRN1;SCRN1;SCRN1;SCRN1       | 0.000117986 | -0.343908301 |
| cg17256234 |                               | 0.000791389 | -0.343989432 |
| cg24101039 | SP4                           | 0.002304201 | -0.344118922 |
| cg18406852 | CHST10                        | 0.007873393 | -0.344167639 |
| cg14477471 |                               | 0.000148457 | -0.344216671 |
| cg20511548 | OSBPL5;OSBPL5;OSBPL5          | 0.007873393 | -0.344253383 |
| cg18232841 | FXYD3;FXYD3;FXYD3;FXYD3;FXYD3 | 0.000654035 | -0.344304631 |
| cg14850660 | HEBP1                         | 0.000537905 | -0.344325837 |
| cg27025738 | SIPA1L1                       | 0.000233422 | -0.344342359 |
| cg08741688 | RGS12;RGS12;RGS12             | 9.24E-05    | -0.344379052 |
| cg21057323 | CDC42BPB                      | 1.11E-05    | -0.344393754 |
| cg00848594 | C10orf25;ZNF22                | 7.23E-05    | -0.344421331 |
| cg15599668 | SYNPO;SYNPO                   | 0.003189589 | -0.344471585 |
| cg16049597 |                               | 0.003189589 | -0.344496537 |
| cg15673994 | TNRC4                         | 0.000148457 | -0.344520716 |
| cg26555531 | ADARB2                        | 0.001948248 | -0.344530954 |
| cg01117384 | PMEPA1;PMEPA1;PMEPA1;PMEPA1   | 0.000117986 | -0.34461649  |
| cg01827012 | TRRAP                         | 0.007873393 | -0.344619525 |
| cg22386008 |                               | 0.000791389 | -0.344674023 |
| cg26609398 | KCTD5                         | 4.34E-05    | -0.344708919 |
| cg03324138 |                               | 2.58E-05    | -0.344756795 |
| cg25578476 |                               | 0.001948248 | -0.344771688 |
| cg11142556 | TBCD                          | 0.000654035 | -0.344849273 |
| cg04275362 | RCSD1                         | 5.59E-05    | -0.344896956 |
| cg18287768 | TNFAIP3                       | 0.000955793 | -0.344965293 |
| cg16513459 | KCNAB3                        | 0.001948248 | -0.344971716 |
| cg07585928 | DUSP15;TTLL9;DUSP15;DUSP15    | 0.000357885 | -0.344981908 |
| cg27059970 |                               | 0.002304201 | -0.344993996 |
| cg21966764 | OR52B2                        | 0.000654035 | -0.345020493 |
| cg14724265 | PPEF2;PPEF2                   | 4.34E-05    | -0.345026976 |
| cg13375463 | AHDC1                         | 0.000955793 | -0.345123474 |
| cg04597312 | IRF8                          | 0.004357816 | -0.345144579 |
| cg24554439 | TMCO3                         | 0.000233422 | -0.345158077 |
| cg14753070 | IL27RA                        | 0.002304201 | -0.34520934  |
| cg12950829 |                               | 3.34E-05    | -0.345284017 |
| cg00446697 | HCCA2                         | 0.000791389 | -0.345369095 |
| cg15704872 | SLC9A2                        | 0.001948248 | -0.345417122 |
| cg03249047 | TBCD                          | 9.24E-05    | -0.345546651 |
| cg04168494 | UBASH3B                       | 0.003189589 | -0.345570101 |
| cg20722088 | DUSP6;DUSP6                   | 0.000654035 | -0.345680724 |
| cg04856396 | P2RX5;P2RX5                   | 3.92E-05    | -0.345693161 |
| cg23619936 |                               | 4.34E-05    | -0.345717563 |
| cg00663986 | TBCD                          | 0.000290372 | -0.345745683 |
| cg03879320 | SLC7A5                        | 0.000357885 | -0.345774535 |
| cg26904702 | SLC27A3                       | 0.000117986 | -0.34577818  |
| cg03366884 | PIK3R5                        | 1.96E-05    | -0.345796119 |
| cg05816398 |                               | 0.001948248 | -0.345807882 |
| cg03366574 |                               | 0.001147425 | -0.345820838 |
| cg05347794 | FOXN3;FOXN3                   | 0.000537905 | -0.345967921 |
| cg18479255 | FAM124A                       | 0.000148457 | -0.346011711 |
| cg14457610 | LMOD3;LMOD3                   | 0.000654035 | -0.346022028 |
| cg05328461 | EIF3G                         | 0.006823935 | -0.346035787 |
| cg02858625 | BOC                           | 0.002714607 | -0.346110775 |
| cg06719042 |                               | 4.34E-05    | -0.346131316 |
| cg10614445 | DNMT3A;DNMT3A;DNMT3A          | 5.59E-05    | -0.346139331 |
| cg14507658 |                               | 0.001376172 | -0.346199429 |
| cg08564487 | SEPT9;SEPT9;SEPT9             | 0.002304201 | -0.34624906  |
| cg20504474 |                               | 0.000537905 | -0.346287558 |
| cg09081994 | CDGAP                         | 0.000654035 | -0.346299301 |
| cg18362538 | KDM4B                         | 0.001376172 | -0.346370316 |

|            |                                        |             |              |
|------------|----------------------------------------|-------------|--------------|
| cg11360546 | C7orf50;C7orf50;C7orf50                | 0.000117986 | -0.346447255 |
| cg02586712 | EHD4                                   | 7.23E-05    | -0.346479883 |
| cg06686156 | ACSM5                                  | 2.58E-05    | -0.346494407 |
| cg21230021 | MIR412;MIR410;MIR409;MIR369;MIR541     | 0.003189589 | -0.346504852 |
| cg08441850 | IKZF3;IKZF3;IKZF3;IKZF3;IKZF3;IKZF3    | 1.50E-05    | -0.346521968 |
| cg10416668 | IL21R;IL21R;IL21R                      | 0.000290372 | -0.346524467 |
| cg02729344 |                                        | 0.000654035 | -0.34656165  |
| cg20318272 | PODXL;PODXL                            | 7.23E-05    | -0.346568228 |
| cg02525435 | CBFA2T3;CBFA2T3                        | 0.000233422 | -0.346573712 |
| cg20091384 | GNG7                                   | 0.001376172 | -0.34660229  |
| cg01792749 | SCN10A                                 | 0.001376172 | -0.346626829 |
| cg27353085 | PLXND1                                 | 0.001948248 | -0.346646975 |
| cg23859051 | SLC43A2                                | 0.002714607 | -0.346676158 |
| cg26797722 | JARID2                                 | 5.59E-05    | -0.346684631 |
| cg03626672 | CXCR7                                  | 7.23E-05    | -0.346719561 |
| cg03025825 | SMG6;SMG6                              | 0.001376172 | -0.346766142 |
| cg14096899 |                                        | 2.58E-05    | -0.346800933 |
| cg27205928 | C7orf50;C7orf50;C7orf50;MIR339         | 0.003189589 | -0.346861724 |
| cg15756359 |                                        | 0.000117986 | -0.346907722 |
| cg18417061 | PRKCH                                  | 0.002714607 | -0.346926764 |
| cg09169516 | MAPKAPK2;MAPKAPK2                      | 0.002714607 | -0.346928806 |
| cg18366956 | SDK2                                   | 5.59E-05    | -0.346964061 |
| cg05819223 | ROR1;ROR1                              | 7.23E-05    | -0.346973045 |
| cg14473838 |                                        | 4.34E-05    | -0.346975786 |
| cg14343017 |                                        | 0.006823935 | -0.346989626 |
| cg11356375 | CDYL;CDYL;CDYL;CDYL                    | 0.000791389 | -0.3470216   |
| cg13654573 | DDHD1;DDHD1;DDHD1                      | 0.000148457 | -0.347059079 |
| cg24998197 |                                        | 0.000148457 | -0.347072158 |
| cg18536994 | LOC283999                              | 0.004357816 | -0.347191726 |
| cg05191839 |                                        | 0.000537905 | -0.347247599 |
| cg13814351 | FAM163B                                | 0.000148457 | -0.347339731 |
| cg08360638 |                                        | 7.23E-05    | -0.347383731 |
| cg11683191 |                                        | 0.000357885 | -0.347395927 |
| cg18316498 | POU2AF1                                | 8.60E-06    | -0.347398816 |
| cg08705382 | GALNT2                                 | 0.005897668 | -0.347430571 |
| cg03040848 | CBFA2T3;CBFA2T3                        | 0.000791389 | -0.347459683 |
| cg01468567 | TEAD2                                  | 0.000122184 | -0.347571055 |
| cg16079645 | C7orf50;C7orf50;C7orf50                | 4.34E-05    | -0.34769257  |
| cg10310700 | TBCD                                   | 7.23E-05    | -0.347711672 |
| cg09334629 |                                        | 4.34E-05    | -0.347760666 |
| cg17164016 |                                        | 0.001948248 | -0.347763629 |
| cg23418201 | MBOAT2                                 | 0.000791389 | -0.347854032 |
| cg12432568 | MCF2L;MCF2L                            | 0.000537905 | -0.347972243 |
| cg18802332 | WISP1;WISP1                            | 0.001147425 | -0.347979356 |
| cg14547801 | PPFIA3                                 | 0.000148457 | -0.348024102 |
| cg01623771 | KLHL30                                 | 4.34E-05    | -0.348115202 |
| cg26275799 |                                        | 5.59E-05    | -0.348151921 |
| cg09611620 | FOXP1;FOXP1                            | 0.000117986 | -0.348176949 |
| cg09802610 | NPHP4                                  | 0.003734675 | -0.348348026 |
| cg07621239 |                                        | 0.000791389 | -0.348447414 |
| cg03923676 | STT3B                                  | 0.000791389 | -0.348489769 |
| cg09059767 | GAS8;GAS8                              | 0.000233422 | -0.348500183 |
| cg22668906 |                                        | 9.24E-05    | -0.348514943 |
| cg02445907 | C6orf222                               | 2.58E-05    | -0.348590805 |
| cg04716447 |                                        | 0.000117986 | -0.348600071 |
| cg03653817 |                                        | 4.34E-05    | -0.34865569  |
| cg17102910 | GPER;C7orf50;C7orf50;GPER;C7orf50;GPER | 4.34E-05    | -0.348755443 |
| cg01843272 | SBF1                                   | 2.58E-05    | -0.348764519 |
| cg00697658 | KIAA1688                               | 0.000654035 | -0.348769823 |
| cg13780428 |                                        | 0.005897668 | -0.348824961 |

|            |                                    |             |              |
|------------|------------------------------------|-------------|--------------|
| cg09595079 | SPPL3                              | 3.34E-05    | -0.348944332 |
| cg10775195 | C14orf166B                         | 0.0050758   | -0.348947888 |
| cg00302763 |                                    | 0.004357816 | -0.348970808 |
| cg18052528 | TNIK;TNIK;TNIK;TNIK;TNIK;TNIK;TNIK | 0.000187194 | -0.349002862 |
| cg04792777 |                                    | 0.001639597 | -0.349033669 |
| cg12253071 |                                    | 0.000791389 | -0.349043894 |
| cg03364781 | ALPK1;ALPK1                        | 5.59E-05    | -0.349045746 |
| cg24126567 | CYGB                               | 0.000654035 | -0.349062795 |
| cg06747087 | MIR595;PTPRN2;PTPRN2;PTPRN2        | 0.001376172 | -0.349080151 |
| cg23316807 | ZNF787                             | 0.000233422 | -0.349219456 |
| cg13479215 | TMTC2                              | 0.003189589 | -0.349287974 |
| cg10427868 | ZMIZ1                              | 9.24E-05    | -0.34928869  |
| cg02960418 | PDGFA;PDGFA                        | 0.00043997  | -0.349383263 |
| cg22353828 | OSBPL5;OSBPL5;OSBPL5               | 9.24E-05    | -0.349424925 |
| cg13804478 | MUC1;MUC1;MUC1;MUC1;MUC1;MUC1;MUC1 | 7.23E-05    | -0.349495258 |
| cg27300619 |                                    | 0.000233422 | -0.349498858 |
| cg18265297 |                                    | 4.34E-05    | -0.34951438  |
| cg12643293 |                                    | 3.34E-05    | -0.349524121 |
| cg04593460 | MAD1L1;MAD1L1;MAD1L1               | 0.001639597 | -0.349528703 |
| cg26359730 | TNR                                | 7.23E-05    | -0.349548584 |
| cg00573857 |                                    | 0.001376172 | -0.349672609 |
| cg19972822 | ZC3HAV1;ZC3HAV1                    | 7.23E-05    | -0.349692856 |
| cg00401433 | ZFPM2                              | 7.23E-05    | -0.34972367  |
| cg02765962 | HRH2;HRH2                          | 0.000955793 | -0.349802047 |
| cg00321234 | SCOC                               | 0.000654035 | -0.349806622 |
| cg03179291 | CAMKK1;CAMKK1;CAMKK1               | 0.001639597 | -0.34988257  |
| cg06423425 | LFNG                               | 0.003189589 | -0.349909728 |
| cg12159992 | MYBPC1;MYBPC1;MYBPC1;MYBPC1        | 0.002304201 | -0.349988831 |
| cg12476455 | NASP;NASP;NASP                     | 0.000148457 | -0.349992135 |
| cg01408363 |                                    | 4.34E-05    | -0.350013877 |
| cg14405813 | HIPK2;HIPK2                        | 7.23E-05    | -0.350403216 |
| cg09791743 | CNPY3                              | 0.000791389 | -0.350426676 |
| cg10603136 |                                    | 1.50E-05    | -0.350493345 |
| cg05025332 |                                    | 1.11E-05    | -0.350519141 |
| cg19823847 | KIAA1244;PBOV1                     | 0.000791389 | -0.350548332 |
| cg12592276 |                                    | 4.34E-05    | -0.350548978 |
| cg08655953 | PLCH2                              | 0.003734675 | -0.350614442 |
| cg05242915 |                                    | 0.001376172 | -0.350707691 |
| cg24722198 |                                    | 0.000537905 | -0.35078625  |
| cg13492133 | SMG7;SMG7;SMG7                     | 0.006823935 | -0.350865444 |
| cg21330727 | RAPGEFL1                           | 0.000233422 | -0.350882998 |
| cg20570464 | HIVEP3;HIVEP3                      | 0.000537905 | -0.350940421 |
| cg05531174 | CBFA2T3;CBFA2T3                    | 0.003189589 | -0.350971467 |
| cg05350607 | LINGO4                             | 4.34E-05    | -0.351009015 |
| cg09926649 | COMT;COMT;COMT                     | 0.002927025 | -0.351151207 |
| cg01108697 | MAPK8IP3;MAPK8IP3                  | 0.002304201 | -0.351186584 |
| cg26495867 |                                    | 0.001948248 | -0.35124385  |
| cg15344504 | STT3B                              | 0.000791389 | -0.351245581 |
| cg18533546 | ARHGEF10                           | 0.002714607 | -0.351278521 |
| cg16664617 | SLC27A1                            | 0.000187194 | -0.351535475 |
| cg02857074 | CACNA2D1                           | 0.000357885 | -0.351615636 |
| cg22014289 | SH3RF3                             | 5.59E-05    | -0.351676626 |
| cg00937012 | CPEB1;CPEB1;CPEB1;CPEB1            | 0.000290372 | -0.351680036 |
| cg03135983 | ZFAT                               | 0.000357885 | -0.351764461 |
| cg08426823 | MAML2                              | 0.000290372 | -0.351839132 |
| cg15651928 | PXMP4;PXMP4                        | 3.34E-05    | -0.351887249 |
| cg17988320 | ZNRF2                              | 5.59E-05    | -0.3519604   |
| cg16214653 |                                    | 0.006823935 | -0.351969645 |
| cg09249101 |                                    | 7.23E-05    | -0.352029915 |
| cg00483459 | ALS2CL                             | 0.004357816 | -0.352032947 |

|            |                                              |             |              |
|------------|----------------------------------------------|-------------|--------------|
| cg16674047 |                                              | 0.00043997  | -0.352099178 |
| cg23261073 | CLSTN1;CLSTN1                                | 0.000955793 | -0.352101289 |
| cg09863413 |                                              | 0.003734675 | -0.352107304 |
| cg19497709 | COPG                                         | 0.003734675 | -0.352152018 |
| cg01360627 | TNF                                          | 0.001147425 | -0.352160322 |
| cg08526209 |                                              | 0.000117986 | -0.352187955 |
| cg01727408 |                                              | 0.001376172 | -0.352258421 |
| cg10696062 | WNT5B                                        | 0.003189589 | -0.352267406 |
| cg20666438 |                                              | 0.000791389 | -0.352344666 |
| cg24973755 | MAEA;MAEA                                    | 0.001147425 | -0.352382483 |
| cg22146593 |                                              | 0.000187194 | -0.352414802 |
| cg11015768 | ST3GAL5                                      | 4.34E-05    | -0.352469156 |
| cg14007090 | LAMA5                                        | 0.000955793 | -0.352501115 |
| cg03730622 | CELSR1                                       | 2.58E-05    | -0.35250733  |
| cg17023034 | CACNB4;CACNB4;CACNB4                         | 9.24E-05    | -0.352521591 |
| cg14228933 |                                              | 7.23E-05    | -0.352574169 |
| cg02006142 | NSMCE2                                       | 0.0050758   | -0.352659102 |
| cg07165029 | MAGI1;MAGI1;MAGI1                            | 3.34E-05    | -0.352663603 |
| cg02835462 | MAST2                                        | 0.000233422 | -0.352678586 |
| cg02823132 | FAM38A                                       | 9.24E-05    | -0.35276521  |
| cg04781339 |                                              | 4.34E-05    | -0.352772147 |
| cg04664897 |                                              | 3.34E-05    | -0.352867147 |
| cg04977922 | UHRF1                                        | 7.23E-05    | -0.352869479 |
| cg09292202 | CACNA2D4                                     | 0.003734675 | -0.353050371 |
| cg01116491 | BANK1;BANK1                                  | 0.006823935 | -0.353100528 |
| cg16745104 | MIR941-1;MIR941-3;MIR941-2;MIR941-2;MIR941-2 | 0.000290372 | -0.353148347 |
| cg22014983 | MAP4K3                                       | 5.59E-05    | -0.353185811 |
| cg24787238 | MAD1L1;MAD1L1;MAD1L1                         | 9.24E-05    | -0.353268355 |
| cg21865762 | SCN8A                                        | 0.00043997  | -0.35327848  |
| cg07272042 |                                              | 0.001376172 | -0.353287748 |
| cg18041814 | CPNE5                                        | 0.005897668 | -0.35332205  |
| cg01640684 | TBCD                                         | 0.001393182 | -0.353330876 |
| cg01861740 |                                              | 0.006738759 | -0.353360313 |
| cg10274029 |                                              | 1.50E-05    | -0.353409614 |
| cg20491695 |                                              | 3.34E-05    | -0.353458926 |
| cg15548859 |                                              | 7.23E-05    | -0.353496287 |
| cg20458044 | TMEM49                                       | 7.23E-05    | -0.353571556 |
| cg08119434 |                                              | 0.003189589 | -0.353611615 |
| cg03892714 | SH3PXD2B                                     | 0.000791389 | -0.353616292 |
| cg10205310 |                                              | 0.001147425 | -0.353633663 |
| cg23593387 | MAD1L1;MAD1L1;MAD1L1                         | 7.23E-05    | -0.353660999 |
| cg22189286 | HSPB8                                        | 0.000290372 | -0.353711931 |
| cg11134246 | CCDC24                                       | 0.001147425 | -0.353723442 |
| cg03857384 | OSBPL5;OSBPL5;OSBPL5                         | 0.001147425 | -0.353730941 |
| cg26919780 | HMHB1                                        | 0.002304201 | -0.353743485 |
| cg09526022 | NRXN2;NRXN2                                  | 0.001376172 | -0.353747953 |
| cg00550955 |                                              | 0.00043997  | -0.353868418 |
| cg10022702 | CBFA2T3;CBFA2T3                              | 0.000955793 | -0.35393898  |
| cg01791634 | TMC8                                         | 2.58E-05    | -0.353944037 |
| cg05894462 | PTPRN2;PTPRN2;PTPRN2                         | 9.24E-05    | -0.353952774 |
| cg16726039 |                                              | 0.002714607 | -0.35395818  |
| cg05112120 |                                              | 9.24E-05    | -0.354009983 |
| cg25338994 |                                              | 0.001948248 | -0.354061729 |
| cg04581293 |                                              | 0.000148457 | -0.354098447 |
| cg15718663 | OSBPL5;OSBPL5;OSBPL5                         | 0.000955793 | -0.354119072 |
| cg17093855 | TMEM104                                      | 0.000290372 | -0.354123086 |
| cg06205746 | ADPRHL1;ADPRHL1                              | 0.000290372 | -0.354237821 |
| cg15078958 |                                              | 4.34E-05    | -0.354271343 |
| cg20210051 | PDZRN4;PDZRN4                                | 0.000187194 | -0.354408458 |
| cg14568203 |                                              | 0.001147425 | -0.354428731 |

|            |                                      |             |              |
|------------|--------------------------------------|-------------|--------------|
| cg00930515 |                                      | 0.006823935 | -0.35453137  |
| cg04858631 | DDIT4                                | 1.96E-05    | -0.354539651 |
| cg08124000 | OSBPL5;OSBPL5;OSBPL5                 | 0.000148457 | -0.354601142 |
| cg03921696 |                                      | 0.000148457 | -0.354631314 |
| cg02689514 | CBFA2T3;CBFA2T3                      | 0.000537905 | -0.354652079 |
| cg03289764 | LOC374443                            | 0.000187194 | -0.354689005 |
| cg03585084 | LHPP;LHPP                            | 7.23E-05    | -0.354690541 |
| cg22900075 | CUEDC1                               | 2.58E-05    | -0.354770984 |
| cg21220462 | SEMA4D;SEMA4D                        | 0.001376172 | -0.354799483 |
| cg11554650 | KIAA1949;KIAA1949                    | 1.96E-05    | -0.354872867 |
| cg06396119 |                                      | 0.002304201 | -0.354908629 |
| cg03771580 | OR5A2                                | 0.000117986 | -0.355058524 |
| cg08616585 | CDH1                                 | 5.59E-05    | -0.355070321 |
| cg18777299 | STIM2;STIM2;STIM2                    | 3.34E-05    | -0.355091171 |
| cg07426848 | S100A3;S100A3                        | 0.000117986 | -0.355214422 |
| cg17755321 | TNF                                  | 0.006823935 | -0.355222218 |
| cg23088126 | FAIM3;FAIM3;FAIM3                    | 0.000955793 | -0.355228004 |
| cg27384918 |                                      | 1.60E-05    | -0.355246988 |
| cg20171453 | RHOH                                 | 0.000654035 | -0.355247946 |
| cg08447200 | PANX2;PANX2;PANX2                    | 0.004357816 | -0.355269799 |
| cg04193065 |                                      | 7.23E-05    | -0.355342094 |
| cg24545100 | LINGO4;RORC;RORC                     | 0.000233422 | -0.355379903 |
| cg26075639 |                                      | 0.001393182 | -0.35556545  |
| cg09977718 | RPTOR;RPTOR                          | 0.003189589 | -0.355599632 |
| cg26438284 | CD81                                 | 0.000148457 | -0.355738006 |
| cg03270204 | DDR1;DDR1                            | 0.005897668 | -0.355787071 |
| cg24394336 | ARHGEF10L;ARHGEF10L                  | 0.001147425 | -0.355852963 |
| cg23022999 | RINL                                 | 0.002714607 | -0.355933952 |
| cg08823209 | FXD3;FXD3;FXD3;FXD3;FXD3;FXD3;FXD3;F | 0.000117986 | -0.355955946 |
| cg13618880 |                                      | 0.000537905 | -0.355969606 |
| cg03657064 | GPR160                               | 0.000537905 | -0.356052992 |
| cg08825200 | KCNMB3;KCNMB3                        | 0.000117986 | -0.356116607 |
| cg08772206 | SH2D4B;SH2D4B                        | 0.0050758   | -0.356140369 |
| cg06935361 | BRCA2                                | 4.34E-05    | -0.356253832 |
| cg13683301 |                                      | 0.002304201 | -0.356260643 |
| cg08766211 |                                      | 0.000537905 | -0.356275152 |
| cg06789500 | MAD1L1;MAD1L1;MAD1L1                 | 0.000955793 | -0.356275647 |
| cg26576937 | EBF4                                 | 7.23E-05    | -0.356369337 |
| cg12011522 | OSBPL6;OSBPL6                        | 2.58E-05    | -0.356418605 |
| cg18131582 | GLT25D2                              | 3.34E-05    | -0.356445034 |
| cg09791746 | ADAMTSL5                             | 0.000290372 | -0.356598968 |
| cg23716690 | KIF1B;KIF1B                          | 0.00043997  | -0.356624319 |
| cg23326607 |                                      | 3.34E-05    | -0.356731048 |
| cg04250930 | ADORA2A                              | 9.24E-05    | -0.356749815 |
| cg12216435 | COPG                                 | 1.96E-05    | -0.356753269 |
| cg15006828 |                                      | 2.58E-05    | -0.356822624 |
| cg23217983 | SGIP1                                | 0.000148457 | -0.35699369  |
| cg19734164 | C5orf56                              | 0.000117986 | -0.357054972 |
| cg20018425 | PANX2;PANX2;PANX2                    | 5.59E-05    | -0.357075409 |
| cg06272045 |                                      | 9.24E-05    | -0.35722668  |
| cg27592424 | C16orf58                             | 0.004357816 | -0.35726449  |
| cg14071925 | LILRA1                               | 2.58E-05    | -0.357272726 |
| cg14182461 | RNF157;FOXJ1                         | 0.000290372 | -0.357288857 |
| cg07127456 | TK2                                  | 5.59E-05    | -0.357389776 |
| cg05242065 | C2orf89                              | 0.000955793 | -0.357409956 |
| cg16686279 |                                      | 0.000117986 | -0.357442404 |
| cg00986598 | TMCC1;TMCC1;TMCC1                    | 0.00043997  | -0.357540516 |
| cg11701615 | C20orf166                            | 4.34E-05    | -0.357653006 |
| cg04444104 |                                      | 9.24E-05    | -0.357689535 |
| cg26146569 | KLF13                                | 0.002304201 | -0.357714053 |

|            |                                     |             |              |
|------------|-------------------------------------|-------------|--------------|
| cg25934954 | MAP4K2                              | 7.23E-05    | -0.357724504 |
| cg08189139 |                                     | 9.24E-05    | -0.357763168 |
| cg14656948 |                                     | 0.000654035 | -0.357800517 |
| cg20125501 |                                     | 0.000290372 | -0.357814806 |
| cg01546472 | ODZ3                                | 0.000233422 | -0.357843818 |
| cg07668558 | GPR179                              | 0.000955793 | -0.357855791 |
| cg11418725 |                                     | 0.000357885 | -0.357869197 |
| cg16391727 | PRKAG2;PRKAG2                       | 0.000148457 | -0.357955497 |
| cg20146177 | HAS2                                | 0.000233422 | -0.358083989 |
| cg18601229 | EHD4                                | 0.001147425 | -0.358091859 |
| cg15415194 |                                     | 7.23E-05    | -0.358091992 |
| cg09174653 | C7orf50;C7orf50;MIR339;C7orf50      | 0.000791389 | -0.358170622 |
| cg21243597 | C18orf1;C18orf1                     | 0.000654035 | -0.358189435 |
| cg10877430 | DTX1                                | 0.000148457 | -0.358229543 |
| cg02319972 |                                     | 4.34E-05    | -0.358242628 |
| cg08612271 | AIG1                                | 0.000654035 | -0.358295878 |
| cg04656831 |                                     | 5.59E-05    | -0.358317678 |
| cg13356324 | GUK1;GUK1;GUK1                      | 0.001147425 | -0.358367153 |
| cg10511902 | CCDC88C                             | 0.001376172 | -0.358532207 |
| cg02251850 | RPTOR;RPTOR                         | 0.001376172 | -0.358633887 |
| cg10283844 | HPCAL1;HPCAL1                       | 0.002714607 | -0.358847413 |
| cg06573088 | CAP2                                | 9.24E-05    | -0.358867234 |
| cg15247329 |                                     | 4.34E-05    | -0.358896353 |
| cg08488915 | SLC43A2                             | 0.006738759 | -0.358979455 |
| cg06691250 |                                     | 0.000187194 | -0.35898673  |
| cg26643870 |                                     | 0.000357885 | -0.359002566 |
| cg27388962 | LOC100216001                        | 9.24E-05    | -0.359093166 |
| cg08263416 | RGS6                                | 4.34E-05    | -0.359137421 |
| cg11465630 | C21orf33;C21orf33                   | 0.001376172 | -0.359153005 |
| cg06559878 | ITK                                 | 3.34E-05    | -0.35919846  |
| cg20300911 |                                     | 1.96E-05    | -0.359209293 |
| cg14220262 | TTL10;TTL10                         | 4.34E-05    | -0.359211754 |
| cg07298347 | FMNL2                               | 0.007873393 | -0.35924696  |
| cg01613294 | APOL3;APOL3;APOL3;APOL3;APOL3;APOL3 | 0.001147425 | -0.359278616 |
| cg01245155 | PARD3B;PARD3B;PARD3B                | 0.000290372 | -0.359281072 |
| cg02662417 | ARID1B;ARID1B;ARID1B                | 0.000187194 | -0.359314972 |
| cg14248717 | C9orf171                            | 0.008829128 | -0.359353034 |
| cg10853416 | MS4A7;MS4A7;MS4A7;MS4A7             | 4.34E-05    | -0.359403797 |
| cg24520862 |                                     | 1.96E-05    | -0.359433894 |
| cg10359807 | USP7                                | 0.00043997  | -0.359439901 |
| cg12991306 | C8orf80                             | 4.34E-05    | -0.35950684  |
| cg02784232 | PHC3                                | 0.000148457 | -0.359543544 |
| cg10456541 |                                     | 3.34E-05    | -0.359544041 |
| cg18741277 | ZGLP1                               | 8.60E-06    | -0.359552519 |
| cg26955540 | SEMA4B                              | 0.000148457 | -0.359624483 |
| cg18973238 |                                     | 0.003734675 | -0.359674676 |
| cg13559409 | ABCA1                               | 0.002304201 | -0.35969034  |
| cg26534812 |                                     | 0.00043997  | -0.359707356 |
| cg03017850 | SPTBN1;SPTBN1                       | 0.000955793 | -0.3597193   |
| cg04406229 |                                     | 0.001376172 | -0.359810393 |
| cg25337513 | RPTOR;RPTOR                         | 2.58E-05    | -0.359811873 |
| cg26448137 |                                     | 0.000148457 | -0.359839391 |
| cg26649096 |                                     | 1.50E-05    | -0.359864176 |
| cg09644974 |                                     | 0.003734675 | -0.359868247 |
| cg18943588 |                                     | 0.000148457 | -0.359902145 |
| cg15316716 | DOK2                                | 2.58E-05    | -0.359931023 |
| cg09863136 | SH2B2                               | 0.000357885 | -0.359940911 |
| cg15246989 | PLXDC1                              | 9.24E-05    | -0.359952848 |
| cg15931673 | TMCO4                               | 0.00043997  | -0.359983455 |
| cg04134235 | FAM49A                              | 0.000233422 | -0.360046492 |

|            |                                    |             |              |
|------------|------------------------------------|-------------|--------------|
| cg27635453 |                                    | 0.003734675 | -0.360090137 |
| cg15208525 | CNTNAP2                            | 9.24E-05    | -0.360122206 |
| cg08241841 | LSM7                               | 0.001376172 | -0.360123819 |
| cg00039016 | FBXO31                             | 0.000955793 | -0.360240786 |
| cg09664479 | CD82;CD82                          | 2.58E-05    | -0.36025162  |
| cg21913301 | PDE3A                              | 2.58E-05    | -0.36029583  |
| cg04931913 | ATP2B2;ATP2B2                      | 4.34E-05    | -0.36034596  |
| cg21674927 | IL1R2;IL1R2                        | 0.000791389 | -0.360408354 |
| cg14286456 | RERE;RERE                          | 4.34E-05    | -0.360452218 |
| cg02781105 | KIF19                              | 1.96E-05    | -0.360462931 |
| cg24924502 | AATK                               | 0.001147425 | -0.360509407 |
| cg09129334 | ARHGEF7;ARHGEF7;ARHGEF7;ARHGEF7;AR | 5.59E-05    | -0.360519727 |
| cg15174117 | CORO2B                             | 0.004357816 | -0.360574553 |
| cg19649018 |                                    | 0.000290372 | -0.360652292 |
| cg11874976 |                                    | 0.000233422 | -0.360725358 |
| cg19816586 | SYT1;SYT1;SYT1                     | 0.003734675 | -0.360829041 |
| cg23714707 | PEMT;PEMT;PEMT                     | 0.001639597 | -0.360873046 |
| cg03695260 |                                    | 0.001639597 | -0.360917443 |
| cg17525436 |                                    | 1.96E-05    | -0.36091822  |
| cg15471388 |                                    | 0.000357885 | -0.360927013 |
| cg01404750 | ATP11A;ATP11A                      | 0.000233422 | -0.360934125 |
| cg09234973 | PAX8;PAX8;PAX8;PAX8;LOC440839;PAX8 | 0.000537905 | -0.360935158 |
| cg21350909 |                                    | 9.24E-05    | -0.360938652 |
| cg15507449 |                                    | 0.002304201 | -0.360969146 |
| cg13977835 |                                    | 0.001147425 | -0.361039385 |
| cg13168221 | C1QA                               | 0.000117986 | -0.36106101  |
| cg01445100 | BANP;BANP                          | 4.34E-05    | -0.361064941 |
| cg08651003 | GNB1                               | 0.006823935 | -0.361111151 |
| cg10039047 | B3GNTL1                            | 0.000117986 | -0.361214725 |
| cg23863328 |                                    | 0.000187194 | -0.361275943 |
| cg21582611 |                                    | 7.23E-05    | -0.361349489 |
| cg19935065 | DNTT;DNTT                          | 4.34E-05    | -0.36136704  |
| cg26141291 | DENND3                             | 0.000290372 | -0.361375522 |
| cg26230851 | PCP4L1                             | 0.006823935 | -0.361472059 |
| cg17890667 | PHTF2;PHTF2;PHTF2;PHTF2;PHTF2      | 0.001948248 | -0.361504699 |
| cg13810695 |                                    | 9.24E-05    | -0.361577839 |
| cg02113385 | NFATC1;NFATC1;NFATC1;NFATC1;NFATC1 | 5.59E-05    | -0.361618551 |
| cg16988611 | TSPAN14;TSPAN14                    | 5.59E-05    | -0.361629091 |
| cg25246082 | TMEM156                            | 0.000290372 | -0.361785766 |
| cg23712594 | PARP1                              | 0.000187194 | -0.361812299 |
| cg09087961 | IGF2BP3                            | 0.000117986 | -0.361827414 |
| cg02127689 |                                    | 0.000233422 | -0.361847635 |
| cg07568430 | CSF1;CSF1;CSF1;CSF1                | 7.23E-05    | -0.361864232 |
| cg03408354 | SLC7A5                             | 0.001147425 | -0.361869534 |
| cg05927789 | TTC7A                              | 4.34E-05    | -0.361899081 |
| cg21121609 | FCER2;FCER2                        | 0.000148457 | -0.362003924 |
| cg19384448 |                                    | 1.96E-05    | -0.362006651 |
| cg24469742 | STARD13;STARD13                    | 0.000654035 | -0.362157011 |
| cg25962657 |                                    | 0.006823935 | -0.362190512 |
| cg27470486 | ACLY;ACLY                          | 1.50E-05    | -0.362220725 |
| cg13613180 | XRRA1                              | 0.000357885 | -0.362252371 |
| cg16774946 | SPATA13;SPATA13                    | 7.23E-05    | -0.362377825 |
| cg13407335 | KCNAB3                             | 0.002714607 | -0.36238976  |
| cg14087413 | TMEM8B;TMEM8B                      | 4.34E-05    | -0.362397592 |
| cg02378006 | UNC5B                              | 0.000955793 | -0.362647526 |
| cg26662512 | MAD1L1;MAD1L1;MAD1L1               | 4.34E-05    | -0.362678255 |
| cg02487823 | KIAA0226;KIAA0226                  | 5.59E-05    | -0.362717831 |
| cg02212836 | LY86;LOC285780                     | 1.50E-05    | -0.36274629  |
| cg01800148 | SLC2A5;SLC2A5;SLC2A5               | 0.000233422 | -0.362861162 |
| cg16471612 |                                    | 0.000233422 | -0.362868201 |



|            |                                   |             |              |
|------------|-----------------------------------|-------------|--------------|
| cg05020759 |                                   | 0.001948248 | -0.362896705 |
| cg25745642 | EFNA3                             | 7.23E-05    | -0.362911001 |
| cg21185255 |                                   | 0.001147425 | -0.362937696 |
| cg12754854 | PHYHD1;PHYHD1                     | 0.001639597 | -0.36299966  |
| cg01709312 | LOC282997;PDCD4;PDCD4             | 1.96E-05    | -0.363013406 |
| cg12348511 | OSBPL5;OSBPL5;OSBPL5              | 0.000117986 | -0.363106299 |
| cg01866518 | PXN;PXN;PXN                       | 5.59E-05    | -0.363228672 |
| cg05303899 |                                   | 7.23E-05    | -0.363314938 |
| cg12534645 | CAMK2A;CAMK2A                     | 9.24E-05    | -0.363436079 |
| cg01807946 | CSNK1D;CSNK1D                     | 7.23E-05    | -0.363451383 |
| cg21428954 | CELSR1                            | 0.000537905 | -0.363466789 |
| cg25306932 | LYSMD1;LYSMD1                     | 2.58E-05    | -0.363474433 |
| cg08145839 | LMF1                              | 0.001948248 | -0.363515435 |
| cg13232176 | KIAA1671                          | 0.001639597 | -0.363533716 |
| cg13519194 |                                   | 9.24E-05    | -0.363645907 |
| cg06546787 | DEFB112                           | 5.59E-05    | -0.363654467 |
| cg19082416 | DIP2C                             | 0.001948248 | -0.363708792 |
| cg04416111 |                                   | 0.000357885 | -0.363783802 |
| cg21080533 | PGK2                              | 7.23E-05    | -0.363803818 |
| cg12152540 | MKX                               | 0.004357816 | -0.363810419 |
| cg25735823 | TSSC1                             | 9.24E-05    | -0.363839871 |
| cg01701303 |                                   | 0.003189589 | -0.363907408 |
| cg17813891 | EVL                               | 0.002304201 | -0.363917366 |
| cg11804940 | WDR66                             | 0.000233422 | -0.363923913 |
| cg13002189 |                                   | 0.000791389 | -0.36396065  |
| cg27296341 | IPCEF1;OPRM1;IPCEF1;IPCEF1        | 0.000791389 | -0.363963819 |
| cg14471645 | RADIL                             | 0.000290372 | -0.364047959 |
| cg14136042 | ATP6V1G2;NFKBIL1;NFKBIL1;ATP6V1G2 | 0.001147425 | -0.364052164 |
| cg12067421 |                                   | 0.000148457 | -0.364115424 |
| cg00001269 |                                   | 0.001948248 | -0.364154834 |
| cg02416333 |                                   | 5.59E-05    | -0.364189025 |
| cg00706536 | ATP6V0A1;ATP6V0A1;ATP6V0A1        | 7.23E-05    | -0.364196326 |
| cg10938221 | KIAA0564                          | 0.002714607 | -0.364224842 |
| cg02852419 | LMF1                              | 0.005897668 | -0.364382391 |
| cg08553274 | KIAA1530                          | 0.001639597 | -0.364458693 |
| cg14267222 |                                   | 0.002714607 | -0.364462801 |
| cg01140247 | C10orf11                          | 7.23E-05    | -0.36446623  |
| cg09976287 |                                   | 4.34E-05    | -0.364488458 |
| cg13906362 | LAT2;LAT2;LAT2                    | 5.59E-05    | -0.364617933 |
| cg08145373 | CD81                              | 0.002304201 | -0.364680286 |
| cg02259723 | ADPGK;ADPGK;ADPGK                 | 0.000117986 | -0.364709874 |
| cg14192130 | CCR6;CCR6                         | 2.58E-05    | -0.364766622 |
| cg03713668 | INO80                             | 0.009066563 | -0.364864133 |
| cg17981790 | FAM49A                            | 4.34E-05    | -0.364890256 |
| cg13688202 | SPTB                              | 9.24E-05    | -0.364897989 |
| cg18151635 |                                   | 0.000233422 | -0.364937318 |
| cg09245302 |                                   | 0.009066563 | -0.365055276 |
| cg13782919 | SYK;SYK;SYK;SYK                   | 4.34E-05    | -0.365073494 |
| cg17608587 | NCRNA00171                        | 0.00043997  | -0.365145034 |
| cg04823738 |                                   | 1.11E-05    | -0.365166594 |
| cg03015498 |                                   | 0.000233422 | -0.365193569 |
| cg01514033 |                                   | 9.24E-05    | -0.365204948 |
| cg18013792 | MAD1L1;MAD1L1;MAD1L1              | 0.001948248 | -0.365244683 |
| cg23579537 | RNASEH2B;RNASEH2B                 | 5.59E-05    | -0.365254545 |
| cg06819373 | PTPRN2;PTPRN2;PTPRN2              | 0.007873393 | -0.365301049 |
| cg17806069 |                                   | 0.000148457 | -0.365321018 |
| cg07522372 | C18orf1;C18orf1                   | 9.24E-05    | -0.365332816 |
| cg22593342 | TSPAN14;TSPAN14                   | 7.23E-05    | -0.365503169 |
| cg21373806 | BAHCC1                            | 2.58E-05    | -0.365590899 |
| cg15778089 | ARPP-21;ARPP-21;ARPP-21;ARPP-21   | 0.0050758   | -0.365621789 |

|            |                                       |             |              |
|------------|---------------------------------------|-------------|--------------|
| cg22528123 | SMAD3;SMAD3                           | 0.000791389 | -0.365652329 |
| cg02981163 |                                       | 0.000654035 | -0.365700731 |
| cg01678292 | ANK1;ANK1;ANK1;ANK1;ANK1;ANK1;ANK1;AN | 0.000955793 | -0.365735681 |
| cg16098726 | GP9                                   | 3.34E-05    | -0.365743966 |
| cg09800748 | KIF21A                                | 0.000537905 | -0.365840907 |
| cg05386769 | TNS1                                  | 0.000148457 | -0.365845884 |
| cg04537602 | CXCR5;CXCR5                           | 1.50E-05    | -0.36592899  |
| cg21579975 | FADS6                                 | 2.58E-05    | -0.365967592 |
| cg13924015 |                                       | 4.34E-05    | -0.366014515 |
| cg15122966 |                                       | 0.004357816 | -0.36606386  |
| cg00659129 | ASAP1                                 | 4.34E-05    | -0.36617074  |
| cg05141988 | SCML4                                 | 0.001147425 | -0.366376803 |
| cg01170124 | ISCU;ISCU                             | 0.001948248 | -0.366382771 |
| cg23991482 | LSM7                                  | 0.00043997  | -0.366385934 |
| cg22700246 |                                       | 1.96E-05    | -0.366395578 |
| cg19682835 | FAM116B                               | 0.001376172 | -0.366426912 |
| cg07267067 | SOAT2                                 | 0.00043997  | -0.366509598 |
| cg12715235 | PAG1                                  | 0.006823935 | -0.366520663 |
| cg17831694 | RPTOR;RPTOR                           | 7.23E-05    | -0.366551558 |
| cg01852186 | LIN7A                                 | 9.24E-05    | -0.366612023 |
| cg07921759 | SAMD4A;SAMD4A                         | 2.58E-05    | -0.366618863 |
| cg17729668 |                                       | 0.000537905 | -0.366642645 |
| cg05710479 | CAMTA1                                | 0.000654035 | -0.366646986 |
| cg07012823 | NOX3                                  | 5.59E-05    | -0.366689598 |
| cg07708521 |                                       | 0.000233422 | -0.366690967 |
| cg16254267 |                                       | 0.001147425 | -0.366739333 |
| cg19002591 |                                       | 5.59E-05    | -0.366871479 |
| cg27627876 | BANP;BANP                             | 0.000233422 | -0.366933694 |
| cg10967866 | INPP5A                                | 0.000290372 | -0.367071325 |
| cg02550151 | BRD1;BRD1                             | 0.000148457 | -0.367092694 |
| cg02956499 | TET3                                  | 0.000117986 | -0.367158666 |
| cg25366639 |                                       | 0.003734675 | -0.36717609  |
| cg18182844 | ITIH3                                 | 0.001948248 | -0.367243198 |
| cg25315819 |                                       | 0.002304201 | -0.367256859 |
| cg08316831 | HMG20A                                | 0.004357816 | -0.367298711 |
| cg04404982 | ITGAL;ITGAL                           | 0.000791389 | -0.367335205 |
| cg07728579 | FSD2                                  | 4.34E-05    | -0.367344196 |
| cg14630748 | TNXB;TNXB                             | 9.24E-05    | -0.367400867 |
| cg08258506 | C14orf43                              | 0.001639597 | -0.367403978 |
| cg12897164 | FBXO32;FBXO32                         | 2.58E-05    | -0.367417332 |
| cg24726137 | CYGB                                  | 1.96E-05    | -0.367425594 |
| cg07532353 |                                       | 0.000570759 | -0.367427787 |
| cg13403369 |                                       | 0.001376172 | -0.367495333 |
| cg24027780 | LOC728743                             | 0.002304201 | -0.367590328 |
| cg11811559 | TCL1A;TCL1A                           | 0.000791389 | -0.3676108   |
| cg07935357 | PEMT;PEMT;PEMT                        | 0.000654035 | -0.367655669 |
| cg25268422 | VAV2;VAV2                             | 0.00043997  | -0.367729148 |
| cg21268658 | PTPRF;PTPRF                           | 0.002714607 | -0.367756313 |
| cg02939781 | KLHL6                                 | 5.59E-05    | -0.367765061 |
| cg21877355 | DYNC1H1                               | 0.000357885 | -0.367784058 |
| cg01618697 |                                       | 0.000357885 | -0.367814352 |
| cg12224388 |                                       | 7.23E-05    | -0.367819575 |
| cg19501902 | CD96;CD96                             | 3.92E-05    | -0.367840707 |
| cg26686647 | RGS12;RGS12;RGS12                     | 4.34E-05    | -0.367883806 |
| cg16396223 | PRKAG2;PRKAG2                         | 0.002714607 | -0.367924618 |
| cg13765778 | DAPK1                                 | 7.23E-05    | -0.367929843 |
| cg06825478 | TNF                                   | 0.002706259 | -0.368019035 |
| cg19306970 | HLX                                   | 8.60E-06    | -0.368197342 |
| cg08640804 |                                       | 0.000791389 | -0.368207383 |
| cg18114313 |                                       | 7.23E-05    | -0.36829248  |

|            |                                         |             |              |
|------------|-----------------------------------------|-------------|--------------|
| cg13280056 | LOC728743                               | 1.96E-05    | -0.368334243 |
| cg19346786 |                                         | 2.58E-05    | -0.368503097 |
| cg01143547 | CCND3;CCND3;CCND3;CCND3                 | 1.96E-05    | -0.368505345 |
| cg13753527 |                                         | 0.000290372 | -0.36857432  |
| cg10319629 |                                         | 0.000233422 | -0.368576681 |
| cg21526778 | SDCCAG8                                 | 0.004357816 | -0.368711287 |
| cg07029002 | ROR1;ROR1                               | 5.59E-05    | -0.368737493 |
| cg01831771 | ATP11A;ATP11A                           | 0.004357816 | -0.368773532 |
| cg09174162 | MAD1L1;MAD1L1;MAD1L1                    | 0.000537905 | -0.368786147 |
| cg13475995 |                                         | 5.59E-05    | -0.368836471 |
| cg25311466 | WFS1;WFS1                               | 7.23E-05    | -0.368860553 |
| cg03517614 |                                         | 4.34E-05    | -0.36889957  |
| cg07324245 | SEPT9;SEPT9;SEPT9;SEPT9;SEPT9;SEPT9     | 0.000117986 | -0.368926292 |
| cg12886494 | ARPP-21;ARPP-21;ARPP-21                 | 0.007873393 | -0.369068698 |
| cg16661609 | LILRB4;LILRB4                           | 0.000654035 | -0.369095824 |
| cg00735329 | MBP;MBP                                 | 0.001376172 | -0.369115032 |
| cg18677148 | CLTC                                    | 0.001639597 | -0.36913973  |
| cg02002247 | SLC27A1                                 | 0.000654035 | -0.369184919 |
| cg09588284 | ACRV1;ACRV1;ACRV1;ACRV1;ACRV1;ACRV1     | 0.000537905 | -0.369227131 |
| cg17163729 |                                         | 5.59E-05    | -0.36926389  |
| cg13621113 | SFRS8                                   | 0.001147425 | -0.369284176 |
| cg16370778 | ARPP-21;ARPP-21;ARPP-21;ARPP-21         | 0.007873393 | -0.369332839 |
| cg15473481 | ITGA7                                   | 4.34E-05    | -0.369395986 |
| cg08888553 | C16orf91                                | 0.000117986 | -0.369564564 |
| cg06159562 | ANKRD11                                 | 3.34E-05    | -0.369584154 |
| cg12964697 | MAD1L1;MAD1L1;MAD1L1                    | 5.59E-05    | -0.369634452 |
| cg03620886 | ZGLP1                                   | 8.60E-06    | -0.369655352 |
| cg00862290 | KCNMB3;KCNMB3                           | 5.59E-05    | -0.369771828 |
| cg14982987 | PPP2R5C;PPP2R5C;PPP2R5C;PPP2R5C;PPP2R5C | 0.000955793 | -0.369838831 |
| cg25193073 | MAD1L1;MAD1L1;MAD1L1                    | 5.59E-05    | -0.369985899 |
| cg10594837 | DENND3                                  | 0.001147425 | -0.370103241 |
| cg13276502 |                                         | 4.34E-05    | -0.370146282 |
| cg19118072 | PLXNC1                                  | 0.001147425 | -0.370152096 |
| cg09971102 | MEG3;MEG3;MEG3                          | 0.001376172 | -0.370202371 |
| cg22902799 | CLEC14A                                 | 0.000357885 | -0.370286781 |
| cg22233020 |                                         | 3.34E-05    | -0.370349936 |
| cg13918228 | CD69;CD69;CD69                          | 0.000654035 | -0.37037976  |
| cg04257752 | C21orf29;KRTAP12-3                      | 0.000357885 | -0.370431923 |
| cg03708045 | KIAA0146                                | 0.000233422 | -0.370527064 |
| cg22376214 |                                         | 0.000357885 | -0.37053937  |
| cg09833475 | PTPRN2;PTPRN2;PTPRN2                    | 0.000233422 | -0.370613962 |
| cg13717350 | SARDH;SARDH                             | 4.34E-05    | -0.370643374 |
| cg05493344 | SARDH;SARDH                             | 3.34E-05    | -0.37070175  |
| cg16353350 | C10orf55                                | 0.000233422 | -0.370740793 |
| cg21188858 | EBF1                                    | 0.001147425 | -0.370770258 |
| cg19364276 |                                         | 0.0050758   | -0.37082994  |
| cg02385728 | FIBCD1;FIBCD1                           | 0.007873393 | -0.370864343 |
| cg26768584 | SATB1;SATB1                             | 0.000290372 | -0.370923037 |
| cg18484299 | GORASP2                                 | 0.000654035 | -0.370925343 |
| cg12111500 |                                         | 4.34E-05    | -0.370971809 |
| cg16173529 | MSRA;MSRA;MSRA                          | 0.000148457 | -0.371050992 |
| cg17829017 | ZFATAS;ZFAT;ZFAT;ZFAT                   | 4.34E-05    | -0.371184508 |
| cg06144110 |                                         | 1.11E-05    | -0.371209983 |
| cg17136255 |                                         | 3.34E-05    | -0.371220617 |
| cg14254562 | TLE1                                    | 0.001948248 | -0.371229165 |
| cg15015996 | ARHGEF16                                | 3.34E-05    | -0.371269162 |
| cg22618337 | C10orf81                                | 0.000117986 | -0.371360091 |
| cg23112464 | TMCO3                                   | 4.34E-05    | -0.371372081 |
| cg03625292 | ABI1;ABI1;ABI1;ABI1                     | 0.000187194 | -0.371403303 |
| cg08002981 | BCAS3;BCAS3                             | 0.007873393 | -0.371460267 |

|            |                                         |             |              |
|------------|-----------------------------------------|-------------|--------------|
| cg11688093 | RAB20                                   | 2.58E-05    | -0.371556471 |
| cg21768702 | C7orf50;C7orf50;C7orf50                 | 0.000148457 | -0.371613194 |
| cg24264042 |                                         | 0.000187194 | -0.371674627 |
| cg26610739 | CDH13                                   | 0.000955793 | -0.371686941 |
| cg17181543 | AK5                                     | 0.003734675 | -0.371734935 |
| cg01758575 | CD19;CD19                               | 7.23E-05    | -0.371908341 |
| cg09773897 | NFIC                                    | 5.59E-05    | -0.371928575 |
| cg17851868 |                                         | 0.000233422 | -0.371970446 |
| cg12743248 | EFCAB1;EFCAB1;EFCAB1                    | 9.24E-05    | -0.372042767 |
| cg22586996 | EBF1                                    | 0.001948248 | -0.372156387 |
| cg02370232 | SORBS1;SORBS1;SORBS1;SORBS1;SORBS1      | 0.000233422 | -0.372161287 |
| cg02713832 | CD6                                     | 2.58E-05    | -0.372249481 |
| cg22870373 | MAD1L1;MAD1L1;MAD1L1                    | 0.000117986 | -0.372298538 |
| cg05050341 | ENG;ENG                                 | 9.24E-05    | -0.37236462  |
| cg14997711 | PTPRJ;PTPRJ                             | 0.001147425 | -0.372404844 |
| cg23347250 | BTBD6;BRF1;BRF1;BRF1                    | 0.002714607 | -0.372587541 |
| cg13702949 |                                         | 0.000117986 | -0.372684377 |
| cg21828517 | ZBTB46                                  | 0.001639597 | -0.372732567 |
| cg25611723 | APCDD1                                  | 0.000187194 | -0.372781124 |
| cg16108580 |                                         | 3.34E-05    | -0.3727944   |
| cg20203400 | TMEM182                                 | 0.000187194 | -0.372819803 |
| cg03742629 |                                         | 0.000117986 | -0.372856436 |
| cg10963218 | S100A13;S100A13;S100A13;S100A1;S100A13; | 0.001147425 | -0.372860058 |
| cg06879681 | ARHGEF10                                | 0.000290372 | -0.372901612 |
| cg02664177 | PDGFA;PDGFA                             | 0.000654035 | -0.372966197 |
| cg20203592 | PHLDB2;PHLDB2;PHLDB2;PHLDB2             | 0.000117986 | -0.37312199  |
| cg15822656 |                                         | 0.001376172 | -0.37316037  |
| cg14649095 |                                         | 0.000654035 | -0.373178631 |
| cg14827643 | RGS12;RGS12                             | 1.50E-05    | -0.373306322 |
| cg18128887 | RCAN3                                   | 1.50E-05    | -0.37334563  |
| cg06527166 | HIVEP3;HIVEP3                           | 0.00043997  | -0.373506811 |
| cg00707814 | KDM2B;KDM2B                             | 9.24E-05    | -0.37352403  |
| cg23230158 | GALNT2                                  | 0.003734675 | -0.373570521 |
| cg10687217 | ABR                                     | 3.34E-05    | -0.373576958 |
| cg07434082 | ARHGEF7;ARHGEF7;ARHGEF7;ARHGEF7;AR      | 5.59E-05    | -0.373605517 |
| cg03786808 | C17orf88                                | 0.0050758   | -0.37376093  |
| cg23953820 | DDR1;DDR1                               | 3.34E-05    | -0.373934054 |
| cg22255288 | RPTOR;RPTOR                             | 0.001948248 | -0.37396102  |
| cg20095669 | PPFIBP1;PPFIBP1                         | 0.005897668 | -0.373976371 |
| cg22250556 |                                         | 0.000233422 | -0.374010448 |
| cg19359550 |                                         | 0.000654035 | -0.374037255 |
| cg13852084 | HLA-DMA                                 | 0.000187194 | -0.374138992 |
| cg23893629 | LAX1;LAX1                               | 0.002304201 | -0.374163806 |
| cg03209332 |                                         | 0.00043997  | -0.374165696 |
| cg15775914 | CHML;OPN3;CHML                          | 4.34E-05    | -0.374189298 |
| cg00862307 |                                         | 0.001639597 | -0.374194158 |
| cg04760708 | CBFA2T3;CBFA2T3                         | 7.23E-05    | -0.374255784 |
| cg00031162 | TNFSF12;TNFSF12-TNFSF13                 | 1.96E-05    | -0.374558692 |
| cg10394757 | CA7;CA7                                 | 0.000148457 | -0.37472333  |
| cg00316478 | ACSF3                                   | 0.000187194 | -0.374777474 |
| cg14139311 |                                         | 1.96E-05    | -0.37480483  |
| cg01437221 | MAD1L1;MAD1L1;MAD1L1                    | 0.000791389 | -0.374806284 |
| cg13503476 |                                         | 4.34E-05    | -0.374819752 |
| cg02217184 | GPR18;GPR18;UBAC2;UBAC2;UBAC2           | 0.000233422 | -0.374865847 |
| cg06060703 | CCDC78                                  | 0.000187194 | -0.375004261 |
| cg18072687 | CD81                                    | 0.001376172 | -0.375042725 |
| cg03841638 |                                         | 0.000233422 | -0.375064519 |
| cg09075743 | MAD1L1;MAD1L1;MAD1L1                    | 0.001639597 | -0.375067326 |
| cg02093062 | ZFYVE27;ZFYVE27;ZFYVE27                 | 0.000357885 | -0.375104341 |
| cg24065957 | ARL15                                   | 0.006823935 | -0.375159316 |

|            |                                    |             |              |
|------------|------------------------------------|-------------|--------------|
| cg12103897 | SNRNP70                            | 0.001147425 | -0.375173403 |
| cg10296718 | ARHGEF10                           | 0.000233422 | -0.375208198 |
| cg24091819 | GPR133                             | 0.000357885 | -0.375222664 |
| cg07039378 |                                    | 5.59E-05    | -0.375250551 |
| cg13665684 | FAM188B                            | 7.23E-05    | -0.375289685 |
| cg02299020 |                                    | 0.005897668 | -0.375300411 |
| cg02410870 | TRABD                              | 0.000233422 | -0.375581602 |
| cg07448742 | NRM                                | 5.59E-05    | -0.375727081 |
| cg01439248 | MYOM2                              | 0.002714607 | -0.375729453 |
| cg06308720 | ZMIZ1                              | 0.000148457 | -0.37575832  |
| cg09372614 |                                    | 0.000117986 | -0.375807623 |
| cg16133703 |                                    | 0.000233422 | -0.375838255 |
| cg22979041 | TIFAB;TIFAB                        | 0.000148457 | -0.375865992 |
| cg25133951 |                                    | 3.92E-05    | -0.37590903  |
| cg08162476 | IQSEC1                             | 0.000148457 | -0.375922621 |
| cg03738656 |                                    | 0.000187194 | -0.375994743 |
| cg24368031 | MRC2                               | 0.001376172 | -0.376048558 |
| cg14712058 | SIN3B                              | 9.24E-05    | -0.376064484 |
| cg02192490 |                                    | 0.001147425 | -0.376118035 |
| cg19126910 | POU2AF1                            | 2.58E-05    | -0.376145156 |
| cg11970797 | CRYL1                              | 0.000148457 | -0.37617339  |
| cg07349815 |                                    | 0.001147425 | -0.376299897 |
| cg25510823 |                                    | 0.000290372 | -0.376319642 |
| cg16997486 | NFATC1;NFATC1;NFATC1;NFATC1;NFATC1 | 0.000791389 | -0.376383388 |
| cg22688656 | MYO16                              | 0.000117986 | -0.376440035 |
| cg07207669 | EFNA1;EFNA1                        | 4.34E-05    | -0.376464832 |
| cg18566313 | SORBS2;SORBS2;SORBS2;SORBS2;SORBS2 | 0.007873393 | -0.376488995 |
| cg03382805 |                                    | 0.002304201 | -0.376569914 |
| cg27190654 |                                    | 3.34E-05    | -0.376576352 |
| cg10211062 |                                    | 9.24E-05    | -0.376627847 |
| cg23830540 | CRMP1;CRMP1                        | 0.000791389 | -0.376691683 |
| cg24678438 |                                    | 3.34E-05    | -0.376726468 |
| cg04917258 | PC;PC;PC                           | 0.000148457 | -0.376854573 |
| cg14331899 | CYBASC3;CYBASC3;CYBASC3            | 0.000148457 | -0.376874882 |
| cg14935025 | CARS;CARS;CARS;CARS                | 1.96E-05    | -0.376874996 |
| cg12689752 | IQGAP3                             | 0.000117986 | -0.376977167 |
| cg05889171 | GRAMD1B                            | 0.000148457 | -0.377007649 |
| cg04930661 | ADARB2                             | 0.000187194 | -0.377105894 |
| cg08549806 |                                    | 0.000233422 | -0.377124522 |
| cg26040809 | ADARB2                             | 0.001376172 | -0.377189912 |
| cg20086579 | ELOF1                              | 0.009066563 | -0.377234895 |
| cg07438246 | SLC6A6;SLC6A6;SLC6A6               | 0.000187194 | -0.377235762 |
| cg13712012 |                                    | 0.000537905 | -0.377338975 |
| cg09727148 | UMODL1;UMODL1                      | 5.59E-05    | -0.377369701 |
| cg17758673 | RGS12;RGS12                        | 0.00043997  | -0.377391049 |
| cg18899797 |                                    | 0.000205664 | -0.377400942 |
| cg21008363 | POM121C                            | 9.24E-05    | -0.377406694 |
| cg22487391 |                                    | 0.001887355 | -0.377407164 |
| cg22153312 |                                    | 0.002304201 | -0.377495054 |
| cg08498833 | TG                                 | 0.000117986 | -0.377514416 |
| cg06880420 | NR5A2;NR5A2                        | 0.002304201 | -0.377538411 |
| cg11195707 |                                    | 0.001639597 | -0.377585822 |
| cg25330422 | STAT3;STAT3;STAT3                  | 0.000187194 | -0.377600333 |
| cg11183935 | TBCD                               | 9.24E-05    | -0.377603453 |
| cg19788186 | KCNJ15;KCNJ15;KCNJ15               | 0.005897668 | -0.377638307 |
| cg12550597 | FAM129C                            | 4.34E-05    | -0.377792032 |
| cg21642988 | DNAJA4;DNAJA4;DNAJA4               | 5.59E-05    | -0.377959754 |
| cg21617903 | VGLL4;VGLL4;VGLL4;VGLL4            | 0.001639597 | -0.378162198 |
| cg27305939 | MORN1;LOC100129534                 | 3.34E-05    | -0.378201296 |
| cg19134130 | TMEM104                            | 2.58E-05    | -0.378207853 |

|            |                                      |             |              |
|------------|--------------------------------------|-------------|--------------|
| cg00754552 | NAPSB                                | 1.50E-05    | -0.378231506 |
| cg08250921 |                                      | 0.000233422 | -0.378352574 |
| cg17426184 | MAPKBP1;MAPKBP1                      | 5.59E-05    | -0.378539735 |
| cg15438314 | MYO9B;MYO9B                          | 1.96E-05    | -0.378566887 |
| cg19478371 | PPP2R5C;PPP2R5C;PPP2R5C;PPP2R5C;PPP  | 0.000537905 | -0.37869159  |
| cg25724842 | PACRG;PACRG;PACRG                    | 4.34E-05    | -0.378722788 |
| cg23867673 | CDH23;CDH23                          | 0.000290372 | -0.378759949 |
| cg16372051 | HSPA1B                               | 0.001376172 | -0.378772558 |
| cg26294551 | GP5                                  | 0.000233422 | -0.378797779 |
| cg26120073 | CCDC88C                              | 4.34E-05    | -0.378873845 |
| cg07402396 | INPP5A                               | 0.006823935 | -0.378897029 |
| cg02433266 |                                      | 0.000187194 | -0.378924188 |
| cg22153994 | ARHGAP27;ARHGAP27                    | 0.000187194 | -0.378931311 |
| cg00432328 | MYST4                                | 0.008133378 | -0.379061902 |
| cg06452129 |                                      | 0.0050758   | -0.379103111 |
| cg18428825 |                                      | 0.000791389 | -0.379253553 |
| cg14688299 |                                      | 9.24E-05    | -0.379304214 |
| cg27304328 | CD84                                 | 0.000148457 | -0.37931588  |
| cg25957332 | DIDO1;DIDO1;DIDO1                    | 0.000233422 | -0.379365798 |
| cg20275211 | PPP2R2C;PPP2R2C                      | 0.000148457 | -0.379431444 |
| cg26421805 |                                      | 0.000955793 | -0.37945214  |
| cg13499923 |                                      | 5.59E-05    | -0.379565617 |
| cg14326743 | ERP44                                | 0.001376172 | -0.379648292 |
| cg03110921 | DLG5                                 | 2.58E-05    | -0.379669073 |
| cg23325384 | ACSL3;ACSL3                          | 9.24E-05    | -0.379699174 |
| cg27007060 | RTN4IP1                              | 0.001639597 | -0.379722403 |
| cg20429981 | CDK11B;CDK11B;CDK11B;CDK11B;CDK11B;L | 2.58E-05    | -0.379756963 |
| cg22164207 | CRNN                                 | 7.23E-05    | -0.379848362 |
| cg17884698 |                                      | 0.0050758   | -0.37997778  |
| cg05897699 | SCAMP2                               | 4.34E-05    | -0.380112981 |
| cg19036372 | PTPRN2;PTPRN2;PTPRN2                 | 7.23E-05    | -0.380124728 |
| cg19014792 | CARD11                               | 1.11E-05    | -0.380171187 |
| cg22951556 | LINGO3                               | 0.009066563 | -0.380195985 |
| cg04270013 |                                      | 0.000791389 | -0.380225771 |
| cg13504055 |                                      | 7.23E-05    | -0.380233066 |
| cg04264560 |                                      | 9.24E-05    | -0.380252989 |
| cg11308319 | HDAC4                                | 4.34E-05    | -0.380466473 |
| cg24733614 | CHST11                               | 7.23E-05    | -0.380509629 |
| cg13758310 | LETM1                                | 0.000955793 | -0.380533904 |
| cg07616791 |                                      | 0.000117986 | -0.380566392 |
| cg27466999 | LMF1                                 | 0.000290372 | -0.380572037 |
| cg19510565 | LAPTM5                               | 4.34E-05    | -0.380579616 |
| cg25940202 |                                      | 9.24E-05    | -0.380663984 |
| cg00353330 |                                      | 0.000791389 | -0.380687073 |
| cg16385865 |                                      | 0.00043997  | -0.380690031 |
| cg17656763 |                                      | 0.0050758   | -0.380706654 |
| cg08043592 | GALP;GALP;GALP;GALP                  | 0.001147425 | -0.380777727 |
| cg07585502 |                                      | 0.007873393 | -0.380882071 |
| cg25863735 | ADAL                                 | 4.34E-05    | -0.38096243  |
| cg25344194 |                                      | 4.34E-05    | -0.38096542  |
| cg12128262 | IER3IP1                              | 0.000654035 | -0.381006458 |
| cg00059089 | FMNL2                                | 5.59E-05    | -0.381106754 |
| cg24918715 | TRIM72                               | 0.000791389 | -0.381126812 |
| cg16320419 | BHLHE40                              | 5.59E-05    | -0.381129519 |
| cg21143086 |                                      | 4.34E-05    | -0.381211209 |
| cg13298528 | CXCR5;CXCR5                          | 4.34E-05    | -0.3812278   |
| cg18741439 | CSGALNACT1;CSGALNACT1;CSGALNACT1     | 7.23E-05    | -0.381272826 |
| cg01538731 | KLHDC4                               | 0.000148457 | -0.381313659 |
| cg27587780 | IRF1                                 | 0.000117986 | -0.381348226 |
| cg25379762 | GAS7                                 | 2.58E-05    | -0.381350013 |

|            |                                                 |             |              |
|------------|-------------------------------------------------|-------------|--------------|
| cg11507187 | CAMK2A;CAMK2A                                   | 0.000233422 | -0.381472642 |
| cg12229979 | MYO9B;MYO9B                                     | 3.34E-05    | -0.381714327 |
| cg07433769 | C18orf1;C18orf1;C18orf1;C18orf1;C18orf1;C18orf1 | 4.34E-05    | -0.381719883 |
| cg24527636 |                                                 | 0.000357885 | -0.381732381 |
| cg21192698 | NFATC1;NFATC1;NFATC1;NFATC1                     | 0.000654035 | -0.381755113 |
| cg08314949 | RPTOR;RPTOR                                     | 7.23E-05    | -0.381820828 |
| cg22226904 |                                                 | 0.000955793 | -0.381858173 |
| cg03553826 |                                                 | 0.00043997  | -0.382016258 |
| cg00669330 | C2orf85                                         | 0.003734675 | -0.382060847 |
| cg07311363 |                                                 | 0.0050758   | -0.382196413 |
| cg22059469 |                                                 | 0.000117986 | -0.382212012 |
| cg23815312 | ARHGAP22                                        | 7.23E-05    | -0.382246691 |
| cg06048193 |                                                 | 0.004357816 | -0.382271746 |
| cg05903720 |                                                 | 0.000117986 | -0.382278331 |
| cg00175150 | ECM1;ECM1                                       | 0.000117986 | -0.382355115 |
| cg02135427 |                                                 | 0.004357816 | -0.382402843 |
| cg19115204 | C12orf56;C12orf56                               | 3.34E-05    | -0.382500781 |
| cg07328664 | DIS3L2                                          | 5.59E-05    | -0.382508152 |
| cg24441810 | TMEM177;TMEM177;TMEM177                         | 0.006823935 | -0.382555177 |
| cg10054332 | PVT1                                            | 0.000537905 | -0.382590407 |
| cg01713348 | C16orf91                                        | 0.000187194 | -0.382677048 |
| cg18960324 |                                                 | 3.34E-05    | -0.382716631 |
| cg16640008 |                                                 | 0.000148457 | -0.382864745 |
| cg22946147 | ZNF804B;MGC26647                                | 0.000187194 | -0.382902254 |
| cg10809134 |                                                 | 0.002714607 | -0.38292817  |
| cg23445604 | ALS2CL                                          | 0.003734675 | -0.382991324 |
| cg27159096 | CMTM2                                           | 0.000654035 | -0.383166025 |
| cg21122693 | RNF4                                            | 0.00043997  | -0.383181161 |
| cg01476222 | TRAF6;TRAF6                                     | 0.000117986 | -0.383214957 |
| cg16386293 | ECM1;ECM1                                       | 0.001147425 | -0.383325387 |
| cg14491284 |                                                 | 0.000148457 | -0.383325869 |
| cg13448775 |                                                 | 5.59E-05    | -0.383356214 |
| cg06748146 | HK1;HK1;HK1;HK1;HK1                             | 3.34E-05    | -0.383440697 |
| cg27009704 |                                                 | 9.24E-05    | -0.383497649 |
| cg07548313 | CD1C                                            | 0.002714607 | -0.383655466 |
| cg16734875 | GRHL3;GRHL3;GRHL3                               | 0.000654035 | -0.383745121 |
| cg19654743 | SEPT9;SEPT9;SEPT9;SEPT9;SEPT9;SEPT9             | 7.23E-05    | -0.383807701 |
| cg11747820 | PTPRU;PTPRU;PTPRU                               | 0.000290372 | -0.38381514  |
| cg24756642 |                                                 | 0.000187194 | -0.383886004 |
| cg04986899 | XYLT1                                           | 0.000955793 | -0.383904822 |
| cg22124590 | HEY2                                            | 4.34E-05    | -0.38396705  |
| cg08548882 | PLEKHG1                                         | 4.34E-05    | -0.383983686 |
| cg09464061 | MGC2752                                         | 0.001948248 | -0.383984067 |
| cg12924120 | C3orf37;C3orf37                                 | 0.000148457 | -0.384015085 |
| cg26574777 | PCCA;PCCA                                       | 7.23E-05    | -0.384022962 |
| cg04884313 | DYNC1H1                                         | 9.24E-05    | -0.384117135 |
| cg11231069 | HDAC4                                           | 0.003189589 | -0.384159636 |
| cg04875041 | VPS13D;VPS13D                                   | 0.000290372 | -0.384227255 |
| cg26881863 | TRAPPC9;TRAPPC9                                 | 0.000648283 | -0.38423236  |
| cg02368508 | TNFRSF17                                        | 4.34E-05    | -0.384281362 |
| cg03327570 |                                                 | 7.23E-05    | -0.38431251  |
| cg10517535 | GAS7;GAS7;GAS7                                  | 8.60E-06    | -0.384504984 |
| cg01053714 | SLC12A6                                         | 0.001376172 | -0.384508699 |
| cg20582941 | ARPP-21;ARPP-21;ARPP-21;ARPP-21;ARPP-21         | 0.006823935 | -0.384535636 |
| cg08743794 | KIAA1949;NRM;KIAA1949                           | 4.34E-05    | -0.384598723 |
| cg14804706 | CD81                                            | 0.000648283 | -0.384674021 |
| cg12240358 | HOMER2;HOMER2;HOMER2;HOMER2                     | 0.003189589 | -0.384873914 |
| cg06657721 |                                                 | 3.34E-05    | -0.384927032 |
| cg13808641 | WNK2                                            | 4.34E-05    | -0.384958511 |
| cg05259303 |                                                 | 9.24E-05    | -0.385000415 |

|            |                                     |             |              |
|------------|-------------------------------------|-------------|--------------|
| cg20640246 |                                     | 0.001147425 | -0.385081757 |
| cg09262100 | CDC42BPB                            | 0.000117986 | -0.385099138 |
| cg11194613 | CTTN;CTTN                           | 0.000955793 | -0.385219086 |
| cg01716252 | ADARB1;ADARB1;ADARB1;ADARB1;ADARB1; | 9.24E-05    | -0.385307238 |
| cg07076850 |                                     | 5.59E-05    | -0.385364623 |
| cg14373410 | TSHR;TSHR;TSHR                      | 0.001639597 | -0.385381239 |
| cg16785077 | MX1                                 | 0.000148457 | -0.385461291 |
| cg23465650 | EBF1                                | 0.003734675 | -0.385470884 |
| cg07206827 | LINGO4                              | 5.59E-05    | -0.385477097 |
| cg11812071 | TNFAIP3                             | 0.009066563 | -0.38565932  |
| cg04731448 | SCT                                 | 0.000791389 | -0.385674775 |
| cg25251562 | ALLC                                | 0.001948248 | -0.385790634 |
| cg08880369 | IFT140;TMEM204                      | 0.000187194 | -0.385859955 |
| cg14608550 | SEPT9;SEPT9;SEPT9;SEPT9;SEPT9       | 7.23E-05    | -0.385943669 |
| cg27017580 | BRF1;BTBD6                          | 0.000290372 | -0.386076005 |
| cg01715572 | ARMC9                               | 1.96E-05    | -0.386212356 |
| cg23344241 | SPTBN2                              | 0.001147425 | -0.386214665 |
| cg13943333 | AFF1;AFF1                           | 0.000187194 | -0.386248378 |
| cg10952171 |                                     | 0.000290372 | -0.386265063 |
| cg22542139 | PEMT;PEMT;PEMT                      | 2.58E-05    | -0.386282855 |
| cg25597952 | MAD1L1;MAD1L1;MAD1L1                | 0.002304201 | -0.386306465 |
| cg01809639 | RCSD1                               | 3.34E-05    | -0.386327554 |
| cg23863157 |                                     | 1.50E-05    | -0.386336789 |
| cg16873863 | SLC22A18AS;SLC22A18                 | 9.24E-05    | -0.386371491 |
| cg15094117 |                                     | 0.002450672 | -0.386390895 |
| cg08945443 | ZMYND17                             | 0.000233422 | -0.386575638 |
| cg07608867 |                                     | 0.000148457 | -0.386582829 |
| cg20560283 |                                     | 0.000791389 | -0.386588845 |
| cg16969872 | RBM26                               | 2.58E-05    | -0.386673612 |
| cg18687314 |                                     | 9.24E-05    | -0.386675311 |
| cg01331275 |                                     | 9.24E-05    | -0.386721232 |
| cg17565299 | TMEM129;TMEM129                     | 5.59E-05    | -0.386833195 |
| cg26375587 | BOC                                 | 0.001147425 | -0.386911771 |
| cg22110158 | ST14                                | 0.000148457 | -0.386928443 |
| cg23124325 |                                     | 0.000117986 | -0.386948868 |
| cg16584662 | PML;PML;PML;PML;PML;PML;PML;PML;PML | 0.000290372 | -0.386971764 |
| cg11014810 | SH3PXD2A                            | 0.000233422 | -0.387039354 |
| cg11555873 |                                     | 0.00043997  | -0.387077459 |
| cg03622263 |                                     | 2.58E-05    | -0.387120681 |
| cg08780166 | SLC8A1;SLC8A1;SLC8A1;SLC8A1         | 0.002040485 | -0.387144333 |
| cg08449164 | SPTBN1;SPTBN1                       | 9.24E-05    | -0.387162541 |
| cg03505866 | KIAA0247                            | 0.000654035 | -0.38718324  |
| cg26217846 | DIAPH1;DIAPH1                       | 1.96E-05    | -0.387193314 |
| cg12221864 | WDR43                               | 0.002304201 | -0.387222284 |
| cg01980810 | SPTBN2                              | 0.001147425 | -0.387261277 |
| cg03647778 | ADAM19                              | 0.000187194 | -0.387357337 |
| cg15700989 |                                     | 0.001147425 | -0.387521352 |
| cg20630690 | ZGLP1                               | 8.60E-06    | -0.387539809 |
| cg02931058 | KLHL30                              | 5.11E-05    | -0.387608308 |
| cg05054910 |                                     | 0.000148457 | -0.387647375 |
| cg05132782 |                                     | 3.34E-05    | -0.387737457 |
| cg16535080 | HLA-E                               | 0.000955793 | -0.387912925 |
| cg10376360 |                                     | 0.00043997  | -0.388040416 |
| cg02309230 |                                     | 0.000537905 | -0.388041774 |
| cg23048001 | MAD1L1;MAD1L1;MAD1L1                | 0.001147425 | -0.388079827 |
| cg10500570 | MIR599;VPS13B;VPS13B;MIR875         | 0.001639597 | -0.388242299 |
| cg03617572 | OSBPL5;OSBPL5;OSBPL5                | 3.34E-05    | -0.388295445 |
| cg03004102 | CD34;CD34                           | 4.34E-05    | -0.388311614 |
| cg14930864 | YWHAQ                               | 0.000233422 | -0.38837833  |
| cg15128555 | IGFBP2                              | 0.000537905 | -0.388413324 |



|            |                                     |             |              |
|------------|-------------------------------------|-------------|--------------|
| cg02286717 | SYNPO2L;SYNPO2L                     | 7.23E-05    | -0.388431509 |
| cg07784959 | CXCR4;CXCR4                         | 0.000117986 | -0.388504506 |
| cg07578772 | FAM194A                             | 0.000148457 | -0.388524553 |
| cg24361098 | BCL11A;BCL11A;BCL11A                | 4.34E-05    | -0.388618255 |
| cg02817932 | KIAA0182;KIAA0182                   | 0.000955793 | -0.388620162 |
| cg21218687 | KIF21B                              | 0.001291055 | -0.388660371 |
| cg15584954 | DIP2C                               | 0.000187194 | -0.388688305 |
| cg01042641 | IFT140                              | 0.000148457 | -0.388711019 |
| cg25772418 | GPR133                              | 0.000537905 | -0.38873613  |
| cg14467066 | BAHCC1                              | 4.34E-05    | -0.388755082 |
| cg12223258 | DCAKD;DCAKD                         | 1.96E-05    | -0.388786365 |
| cg18783047 | ZGLP1                               | 1.11E-05    | -0.388884416 |
| cg20745620 |                                     | 0.000791389 | -0.388885525 |
| cg06820006 | GPR133                              | 0.000233422 | -0.388888386 |
| cg22450342 | MR1                                 | 1.96E-05    | -0.388934909 |
| cg07613391 | TGFBR2;TGFBR2                       | 2.58E-05    | -0.389014849 |
| cg17400366 | ZGLP1                               | 8.60E-06    | -0.389032009 |
| cg06113708 | COMTD1                              | 0.00043997  | -0.389036332 |
| cg03999941 |                                     | 0.000791389 | -0.389077201 |
| cg13354414 | ZNF804B;MGC26647                    | 0.000148457 | -0.389083195 |
| cg12136950 | ITPKB                               | 3.34E-05    | -0.389135927 |
| cg06443678 |                                     | 0.001948248 | -0.389220933 |
| cg02671711 | RPTOR;RPTOR                         | 0.000148457 | -0.389249034 |
| cg05166473 | BANP;BANP                           | 0.000233422 | -0.389252071 |
| cg07956000 |                                     | 0.000148457 | -0.389283542 |
| cg23184226 | TECPR1                              | 9.24E-05    | -0.389290472 |
| cg17123334 |                                     | 0.003734675 | -0.389408873 |
| cg12977548 | DHX15                               | 4.34E-05    | -0.389462541 |
| cg01005441 | ARHGEF10                            | 0.001376172 | -0.389467884 |
| cg05295930 | ACSF3;ACSF3;ACSF3                   | 0.000117986 | -0.389503933 |
| cg21965980 | FXVD3;FXVD3;FXVD3;FXVD3;FXVD3       | 0.00043997  | -0.389538546 |
| cg02989448 | SLC45A1                             | 4.34E-05    | -0.389631229 |
| cg00827581 | RAVER1                              | 1.50E-05    | -0.389655372 |
| cg20546215 |                                     | 0.005897668 | -0.389691879 |
| cg01803461 |                                     | 0.001376172 | -0.389721041 |
| cg20555462 | UBASH3B                             | 0.001639597 | -0.389793998 |
| cg26593521 | FAM71B                              | 0.002714607 | -0.389799662 |
| cg18851795 |                                     | 0.000148457 | -0.389830369 |
| cg16161418 | KIAA1949;KIAA1949                   | 0.000357885 | -0.389835126 |
| cg00405484 | EIF2C2;EIF2C2                       | 0.000654035 | -0.389990045 |
| cg21515305 | ELFN2                               | 0.000791389 | -0.389995646 |
| cg04848693 | MAD1L1;MAD1L1;MAD1L1                | 0.007873393 | -0.389996499 |
| cg23201527 |                                     | 0.000357885 | -0.390016779 |
| cg17341502 | BRF1;BRF1                           | 0.000955793 | -0.390024162 |
| cg02376282 | HCCA2                               | 0.001147425 | -0.390051249 |
| cg02236941 |                                     | 0.003734675 | -0.390169097 |
| cg04141975 |                                     | 0.004357816 | -0.390236469 |
| cg01243072 |                                     | 5.59E-05    | -0.390327943 |
| cg15625636 | GPR65                               | 0.003189589 | -0.390343751 |
| cg00924622 | CROCCL2                             | 9.24E-05    | -0.390361031 |
| cg00393373 | ZNF518B                             | 0.00043997  | -0.390423812 |
| cg24933856 | LOC100188949                        | 4.34E-05    | -0.39045087  |
| cg25354657 | APLP2;APLP2;APLP2;APLP2;APLP2;APLP2 | 4.34E-05    | -0.390485588 |
| cg01894985 | MYLK;MYLK;MYLK;MYLK                 | 2.58E-05    | -0.390515946 |
| cg02167837 |                                     | 0.000537905 | -0.390537128 |
| cg18516609 | ZEB1;ZEB1;ZEB1;ZEB1;ZEB1            | 0.000791389 | -0.390565649 |
| cg02676052 | LCP2                                | 9.24E-05    | -0.390623249 |
| cg04554272 | LMF1                                | 0.000955793 | -0.390677356 |
| cg05872570 |                                     | 0.000290372 | -0.390770957 |
| cg09437994 | CBFA2T3                             | 1.96E-05    | -0.390848678 |

|            |                                     |             |              |
|------------|-------------------------------------|-------------|--------------|
| cg17491300 | ARHGEF10                            | 0.001639597 | -0.390904387 |
| cg02403929 | RPTOR;RPTOR                         | 0.000654035 | -0.390915957 |
| cg10661263 |                                     | 5.59E-05    | -0.390972207 |
| cg23237276 |                                     | 3.34E-05    | -0.391059297 |
| cg19365614 | TTC24                               | 0.000654035 | -0.391068207 |
| cg03663984 | LMOD3                               | 4.34E-05    | -0.3910865   |
| cg03281139 | NFIC;NFIC                           | 0.000117986 | -0.3911803   |
| cg15235922 | MTSS1                               | 0.001147425 | -0.391226037 |
| cg20647799 |                                     | 5.11E-05    | -0.391353987 |
| cg06224893 | DNMT3A;DNMT3A;DNMT3A                | 0.001376172 | -0.391384942 |
| cg05215277 | ZNF434                              | 0.001948248 | -0.391457943 |
| cg15829622 | PFKL;PFKL                           | 0.000290372 | -0.391466898 |
| cg03386536 |                                     | 0.000290372 | -0.391483394 |
| cg03565153 | PHACTR1                             | 0.001376172 | -0.391532462 |
| cg11086127 | PTPRA;PTPRA;PTPRA                   | 0.002714607 | -0.391546024 |
| cg01259220 | C7orf20                             | 0.0050758   | -0.391584521 |
| cg00661777 | PIK3CG                              | 1.11E-05    | -0.391650302 |
| cg19052272 | ALLC                                | 0.000117986 | -0.391659695 |
| cg04510420 | BANP;BANP                           | 0.000955793 | -0.391739063 |
| cg20496896 | LRR2;LRR2                           | 0.000537905 | -0.391762358 |
| cg13443938 |                                     | 0.000117986 | -0.391802277 |
| cg21089050 | GAS7                                | 0.000791389 | -0.391867602 |
| cg01869288 |                                     | 0.002714607 | -0.391890354 |
| cg08059719 |                                     | 0.000117986 | -0.391896725 |
| cg13823415 | TBXAS1;TBXAS1                       | 0.003189589 | -0.391910755 |
| cg12700039 | TBC1D16                             | 0.000357885 | -0.391938451 |
| cg08102294 | IQSEC1                              | 5.59E-05    | -0.392187493 |
| cg07426634 |                                     | 0.000117986 | -0.392223549 |
| cg03199996 | FAM65C                              | 2.58E-05    | -0.392291428 |
| cg21173239 | ELK3                                | 9.24E-05    | -0.392539026 |
| cg00532477 | SMPD4;SMPD4;SMPD4;SMPD4;SMPD4;SMPD4 | 0.000570759 | -0.392595753 |
| cg12629515 | HIST1H3J;HIST1H2BO                  | 1.96E-05    | -0.392601302 |
| cg26700919 | C18orf1;C18orf1                     | 0.001376172 | -0.392613483 |
| cg00183468 |                                     | 0.000187194 | -0.39265245  |
| cg08245249 | SLC8A1;SLC8A1;SLC8A1;SLC8A1         | 0.000537905 | -0.392689567 |
| cg10203922 | HHIP                                | 0.000290372 | -0.392742424 |
| cg09267773 |                                     | 0.000955793 | -0.392748602 |
| cg05592114 | C1R                                 | 0.000357885 | -0.392760956 |
| cg15514918 |                                     | 0.000117986 | -0.392806853 |
| cg01495332 | GRB10;GRB10;GRB10                   | 9.24E-05    | -0.392809854 |
| cg20159193 | NUDT3                               | 5.59E-05    | -0.392834158 |
| cg10296867 | GAS7                                | 9.24E-05    | -0.392839461 |
| cg15522953 | ZMIZ1                               | 0.000290372 | -0.39304363  |
| cg05154234 | HDAC7;HDAC7                         | 2.58E-05    | -0.393061547 |
| cg13619044 | C7orf41                             | 4.34E-05    | -0.393146753 |
| cg27012421 |                                     | 1.96E-05    | -0.393151332 |
| cg04096368 | SLC37A1                             | 0.001376172 | -0.393195969 |
| cg24326021 | EPN1;EPN1;EPN1;EPN1                 | 7.23E-05    | -0.393206883 |
| cg20681184 | PIK3CD                              | 0.000148457 | -0.393271714 |
| cg13974894 |                                     | 0.00043997  | -0.393465927 |
| cg19095143 | TEX264;TEX264;TEX264                | 9.24E-05    | -0.393466082 |
| cg00920892 | RAB11FIP1;RAB11FIP1;RAB11FIP1       | 2.58E-05    | -0.3936084   |
| cg06001786 | CCNJL                               | 0.001147425 | -0.393610408 |
| cg08364730 | CREBBP;CREBBP                       | 4.34E-05    | -0.393678456 |
| cg16012294 | MAD1L1;MAD1L1;MAD1L1                | 5.59E-05    | -0.393694411 |
| cg21494075 | PRDM10;PRDM10;PRDM10;PRDM10         | 0.001948248 | -0.393819471 |
| cg18076842 | C11orf75                            | 4.34E-05    | -0.393840053 |
| cg09936008 | ZNF213;ZNF213                       | 0.001639597 | -0.39385719  |
| cg09217898 |                                     | 0.000233422 | -0.393910998 |
| cg00223136 |                                     | 0.000791389 | -0.393938455 |

|            |                                      |             |              |
|------------|--------------------------------------|-------------|--------------|
| cg20029153 | MYO18A;MYO18A                        | 0.000117986 | -0.394046168 |
| cg20414082 |                                      | 4.34E-05    | -0.39424663  |
| cg12338690 | POM121                               | 0.000117986 | -0.394253669 |
| cg03402235 | ZFP106                               | 0.000537905 | -0.394289167 |
| cg10687006 | FAM188B                              | 0.001948248 | -0.394289224 |
| cg02547426 | RGS12;RGS12;RGS12                    | 1.50E-05    | -0.394488322 |
| cg19919989 | CD180                                | 1.11E-05    | -0.394498118 |
| cg27480819 | SOX5;SOX5;SOX5                       | 4.34E-05    | -0.394531241 |
| cg06796885 |                                      | 0.000117986 | -0.394534615 |
| cg17783213 | COL22A1                              | 0.000791389 | -0.39463045  |
| cg04767507 | ZMIZ1                                | 7.23E-05    | -0.394696484 |
| cg21639922 | PDE9A;PDE9A;PDE9A;PDE9A;PDE9A;PDE9A; | 0.009066563 | -0.394817827 |
| cg25635544 |                                      | 0.000233422 | -0.394847838 |
| cg03403168 |                                      | 0.000357885 | -0.394909459 |
| cg16560824 | DENND3                               | 0.001639597 | -0.394924354 |
| cg08289130 |                                      | 0.00043997  | -0.394969    |
| cg05450916 | TGFBR2;TGFBR2                        | 3.34E-05    | -0.395005707 |
| cg22413209 | FBLN7;FBLN7                          | 0.000233422 | -0.395079651 |
| cg04051927 |                                      | 0.000955793 | -0.39511619  |
| cg00976532 | PDPK1;PDPK1                          | 0.000187194 | -0.395166988 |
| cg22335223 | FXD2                                 | 1.50E-05    | -0.395346162 |
| cg19212779 | FRYL                                 | 0.00043997  | -0.395361828 |
| cg21331947 | CPNE5                                | 3.34E-05    | -0.395370109 |
| cg03144619 | GALNT2                               | 0.007873393 | -0.395377687 |
| cg27090678 |                                      | 5.59E-05    | -0.395453216 |
| cg17904575 | PPP2R5C;PPP2R5C;PPP2R5C;PPP2R5C;PPP2 | 1.96E-05    | -0.395592355 |
| cg10696539 | LSM7                                 | 9.24E-05    | -0.395598159 |
| cg13351061 | RPS6KA2                              | 3.34E-05    | -0.395624316 |
| cg27569829 | BCL2                                 | 7.23E-05    | -0.395883231 |
| cg13799081 | RBM20                                | 4.34E-05    | -0.395928255 |
| cg17837492 | SH3RF3                               | 5.59E-05    | -0.395960798 |
| cg15242630 | MICAL3;MICAL3;MICAL3                 | 0.001376172 | -0.395967752 |
| cg10903916 | ASAP2;ASAP2                          | 0.001948248 | -0.395971651 |
| cg24607603 | KIAA2018                             | 0.000334462 | -0.396070423 |
| cg05481243 | BID;BID                              | 0.000654035 | -0.396085061 |
| cg26736232 | SCT                                  | 0.000537905 | -0.396159553 |
| cg21012788 |                                      | 0.005897668 | -0.39622815  |
| cg22040631 |                                      | 0.000233422 | -0.396261333 |
| cg23672659 | KIAA1949;KIAA1949                    | 2.58E-05    | -0.396360086 |
| cg20557159 | SEPT9;SEPT9;SEPT9;SEPT9;SEPT9;SEPT9  | 0.001147425 | -0.396638691 |
| cg04854098 | TSPAN5                               | 0.000654035 | -0.39666002  |
| cg02642565 | C16orf5                              | 0.000187194 | -0.396690755 |
| cg24426483 |                                      | 2.58E-05    | -0.396749965 |
| cg06942637 | SNAPIN                               | 0.00043997  | -0.396770116 |
| cg07127883 |                                      | 0.002714607 | -0.396814223 |
| cg24143611 | SNORD23;GLTSCR2                      | 0.007873393 | -0.396886085 |
| cg15035590 | LRIG1                                | 0.000654035 | -0.396919685 |
| cg14073818 |                                      | 0.001639597 | -0.396979711 |
| cg21881330 | SLC24A4;SLC24A4;SLC24A4              | 0.006823935 | -0.396989835 |
| cg14256511 |                                      | 0.003189589 | -0.397057225 |
| cg10959907 | RGS12;RGS12;RGS12                    | 0.001147425 | -0.397075639 |
| cg18714560 | SCT                                  | 5.59E-05    | -0.397089515 |
| cg09286367 | MIR589;FBXL18                        | 0.00043997  | -0.397147153 |
| cg27210863 | SH2D4B;SH2D4B                        | 0.000117986 | -0.397412152 |
| cg21141089 |                                      | 4.34E-05    | -0.397723244 |
| cg02766770 | YPEL5;YPEL5;YPEL5;YPEL5              | 0.00043997  | -0.397896502 |
| cg01735277 | CSK;CSK                              | 2.58E-05    | -0.397907332 |
| cg10321623 | B4GALNT3                             | 0.000290372 | -0.397930944 |
| cg03112433 | CDK14                                | 3.34E-05    | -0.397993604 |
| cg12547839 | UBE2O                                | 0.000537905 | -0.398056693 |

|            |                                    |             |              |
|------------|------------------------------------|-------------|--------------|
| cg05226180 | KCNMA1;KCNMA1;KCNMA1;KCNMA1        | 0.000290372 | -0.398102577 |
| cg06285909 | TMCO7                              | 0.000791389 | -0.398160964 |
| cg23025244 | APOM                               | 0.005897668 | -0.398177941 |
| cg13152690 |                                    | 2.58E-05    | -0.398192756 |
| cg11683242 | LCK                                | 0.000290372 | -0.398283904 |
| cg04525441 | ADARB2                             | 0.000187194 | -0.398501766 |
| cg26384465 | LDB1;LDB1                          | 0.001147425 | -0.39859329  |
| cg04781796 | GABRD                              | 0.000654035 | -0.398620394 |
| cg13554018 | SPIN1                              | 3.34E-05    | -0.398634573 |
| cg01891260 | VPREB1                             | 0.000148457 | -0.398661042 |
| cg23019125 | RPTOR;RPTOR                        | 4.34E-05    | -0.398672681 |
| cg11351527 | FFAR1                              | 5.59E-05    | -0.398691202 |
| cg26391080 | SH2D4B                             | 0.00043997  | -0.398773808 |
| cg05688618 | ARHGAP24;ARHGAP24;ARHGAP24         | 0.00043997  | -0.398842377 |
| cg00517080 | VPS26B                             | 0.000187194 | -0.398843409 |
| cg06789686 |                                    | 2.58E-05    | -0.398853808 |
| cg10422067 | TP53I11;TP53I11                    | 0.000117986 | -0.3990199   |
| cg19830983 |                                    | 0.002304201 | -0.399083051 |
| cg09152136 |                                    | 0.002714607 | -0.399109177 |
| cg10741308 | SORBS1;SORBS1;SORBS1;SORBS1;SORBS1 | 0.000233422 | -0.399152973 |
| cg13763661 |                                    | 0.000117986 | -0.399181797 |
| cg05705140 |                                    | 0.000290372 | -0.399291836 |
| cg03377767 | MSGN1                              | 4.34E-05    | -0.399369133 |
| cg26163153 | RHOH                               | 0.000791389 | -0.399422658 |
| cg15142214 |                                    | 0.000357885 | -0.399547815 |
| cg07139495 |                                    | 0.000654035 | -0.399579685 |
| cg07546433 |                                    | 0.000187194 | -0.399587525 |
| cg02830351 | FKBP1A;FKBP1A                      | 0.000955793 | -0.399591623 |
| cg04837170 | CCDC154                            | 0.007873393 | -0.399699395 |
| cg17604985 |                                    | 0.000290372 | -0.399800966 |
| cg24655669 | MAD1L1;MAD1L1;MAD1L1               | 5.59E-05    | -0.39980737  |
| cg05035470 |                                    | 0.005897668 | -0.399887002 |
| cg16194437 | CASD1                              | 0.001147425 | -0.399888249 |
| cg00815266 |                                    | 5.59E-05    | -0.399967728 |
| cg01644640 |                                    | 2.58E-05    | -0.400081996 |
| cg20812722 |                                    | 1.50E-05    | -0.400110303 |
| cg00629382 | MSRA;MSRA;MSRA                     | 0.001639597 | -0.400112907 |
| cg14646977 | NRM;KIAA1949                       | 2.58E-05    | -0.400129121 |
| cg21775279 | XKR8;SMPDL3B                       | 0.000233422 | -0.400179115 |
| cg08789697 | TMPRSS11A;TMPRSS11A                | 0.000791389 | -0.400197095 |
| cg06603309 | KCNQ1;KCNQ1                        | 3.34E-05    | -0.400269591 |
| cg27248474 | CBFA2T3;CBFA2T3                    | 0.000357885 | -0.400292574 |
| cg14779735 | BANK1;BANK1;BANK1                  | 0.000955793 | -0.400485154 |
| cg05949181 |                                    | 0.000290372 | -0.400494624 |
| cg16703466 | ZNF672                             | 0.000187194 | -0.400517026 |
| cg11132534 |                                    | 9.24E-05    | -0.400547877 |
| cg24090911 | AHRR                               | 3.34E-05    | -0.400551266 |
| cg14528056 | GBAP1                              | 7.23E-05    | -0.400620571 |
| cg16172923 | MAD1L1;MAD1L1;MAD1L1               | 0.000537905 | -0.400742253 |
| cg00559635 | RGS12;RGS12;RGS12                  | 2.58E-05    | -0.400747413 |
| cg11105610 | LGALS3BP                           | 0.000654035 | -0.400839223 |
| cg05163330 | ADPRHL1;ADPRHL1                    | 0.000357885 | -0.400839284 |
| cg22928606 | SMURF1;SMURF1                      | 0.004357816 | -0.400861379 |
| cg15706621 | SPTBN1;SPTBN1                      | 0.000117986 | -0.4009766   |
| cg03518390 | PACS2;PACS2                        | 1.96E-05    | -0.401001416 |
| cg19723715 | GPER;C7orf50;C7orf50;GPER;C7orf50  | 0.000290372 | -0.401081353 |
| cg26632171 | MSGN1                              | 0.000233422 | -0.401084168 |
| cg20769856 |                                    | 3.34E-05    | -0.4011622   |
| cg04369957 | ST5;ST5;ST5                        | 0.000233422 | -0.401166287 |
| cg00697095 | GRB7;GRB7                          | 0.000233422 | -0.401474386 |

|            |                                     |             |              |
|------------|-------------------------------------|-------------|--------------|
| cg07609372 | ASB10;ASB10;ASB10                   | 4.34E-05    | -0.4014834   |
| cg13474692 | MGMT                                | 4.34E-05    | -0.40156431  |
| cg24485696 | AGPAT5                              | 0.000148457 | -0.401595998 |
| cg06193766 | DIP2C                               | 5.59E-05    | -0.401605924 |
| cg11253913 | CALD1;CALD1;CALD1;CALD1;CALD1       | 0.000233422 | -0.401619268 |
| cg23462129 | PLEKHG4B                            | 0.000233422 | -0.401682425 |
| cg10812439 | ZMIZ1                               | 9.24E-05    | -0.401695643 |
| cg16182685 | TSSC1                               | 0.000955793 | -0.401697647 |
| cg03228516 | CSNK1E;CSNK1E                       | 0.000117986 | -0.401730969 |
| cg04153882 | WIPI2;WIPI2;WIPI2;WIPI2;WIPI2       | 0.000654035 | -0.401745522 |
| cg20772590 | SEPT9;SEPT9;SEPT9;SEPT9;SEPT9;SEPT9 | 3.34E-05    | -0.401786762 |
| cg01353670 |                                     | 0.000955793 | -0.401807585 |
| cg24803346 | SFXN5                               | 0.000148457 | -0.401830416 |
| cg18181904 | PCTP;PCTP                           | 0.000148457 | -0.401927748 |
| cg26542567 |                                     | 0.003189589 | -0.402166245 |
| cg15464148 | LPAR5                               | 0.000187194 | -0.402323151 |
| cg06238667 | KIF13B                              | 0.000537905 | -0.402360789 |
| cg15817163 | SFRS8                               | 0.000791389 | -0.402390128 |
| cg08466256 | COL5A2                              | 9.24E-05    | -0.402480071 |
| cg23318523 | ZC3H3                               | 0.000117986 | -0.402516434 |
| cg07637440 |                                     | 0.000357885 | -0.402726029 |
| cg03900378 |                                     | 3.34E-05    | -0.402738713 |
| cg15936385 | CD81                                | 0.001639597 | -0.402752265 |
| cg19863456 | GPR157                              | 0.003734675 | -0.402841516 |
| cg14792008 | SNRNP70                             | 0.000290372 | -0.402890133 |
| cg22115465 | MAD1L1;MAD1L1;MAD1L1                | 0.000187194 | -0.402968486 |
| cg23218957 | DACT1;DACT1                         | 0.00043997  | -0.403020261 |
| cg20657903 | C10orf128                           | 7.23E-05    | -0.403200905 |
| cg14855367 | UTS2D;CCDC50;CCDC50;UTS2D           | 9.24E-05    | -0.403203343 |
| cg16306078 |                                     | 0.000117986 | -0.403260778 |
| cg25578949 |                                     | 1.50E-05    | -0.403350713 |
| cg16872613 |                                     | 0.000148457 | -0.403424574 |
| cg02611507 | HLTF;HLTF                           | 0.001639597 | -0.403434891 |
| cg27109748 | MAD1L1;MAD1L1;MAD1L1                | 0.000117986 | -0.403533916 |
| cg01942816 | MIR589;FBXL18                       | 4.34E-05    | -0.403555463 |
| cg20456620 | INPP5A                              | 0.000791389 | -0.403568408 |
| cg20781981 | C5orf56                             | 0.00043997  | -0.403615665 |
| cg26271001 |                                     | 3.34E-05    | -0.403625359 |
| cg12708109 |                                     | 9.24E-05    | -0.40370081  |
| cg13200575 |                                     | 0.000357885 | -0.403829785 |
| cg20234640 | FCER2                               | 7.23E-05    | -0.403864856 |
| cg12810837 | CLEC2D;CLEC2D                       | 3.34E-05    | -0.403887038 |
| cg13406085 | ABCD2                               | 0.000290372 | -0.404042301 |
| cg17095147 | WDR1;WDR1                           | 0.001948248 | -0.404057226 |
| cg15119640 | CAPN8                               | 0.000187194 | -0.404196143 |
| cg06933796 |                                     | 0.000117986 | -0.404228668 |
| cg23240213 |                                     | 3.34E-05    | -0.404332357 |
| cg19384997 | CRYL1                               | 0.007873393 | -0.40437166  |
| cg01323777 | KCNAB3                              | 0.003734675 | -0.404505326 |
| cg08939052 |                                     | 0.00043997  | -0.404600642 |
| cg24154631 |                                     | 0.000537905 | -0.404671414 |
| cg08461451 | LINGO3                              | 0.000357885 | -0.404748582 |
| cg03243902 | TRAPPC9;TRAPPC9                     | 0.000233422 | -0.404911182 |
| cg15561778 | GAB1;GAB1                           | 0.00043997  | -0.404918213 |
| cg01433914 | ADD3;ADD3;ADD3                      | 0.000955793 | -0.404958956 |
| cg22466678 |                                     | 0.000148457 | -0.405011762 |
| cg17404289 | MAD1L1;MAD1L1;MAD1L1                | 0.002304201 | -0.405056025 |
| cg14885762 | SEPT9;SEPT9;SEPT9;SEPT9;SEPT9;SEPT9 | 2.58E-05    | -0.405211172 |
| cg14422093 |                                     | 9.24E-05    | -0.405227065 |
| cg26069615 | SLC38A1;SLC38A1                     | 0.001948248 | -0.405310067 |

|            |                                    |             |              |
|------------|------------------------------------|-------------|--------------|
| cg19730314 |                                    | 0.002714607 | -0.405611958 |
| cg25112590 |                                    | 3.34E-05    | -0.405716867 |
| cg15532942 | NFATC1;NFATC1;NFATC1;NFATC1;NFATC1 | 0.000187194 | -0.405768323 |
| cg23259289 | RICH2                              | 0.000187194 | -0.405816543 |
| cg14014879 | ABCA4                              | 0.000357885 | -0.405821327 |
| cg06334737 | SCGB2A1;SCGB2A1                    | 0.001376172 | -0.405880902 |
| cg15181441 |                                    | 0.000187194 | -0.405886227 |
| cg23100428 | SNAI1                              | 0.000187194 | -0.40595924  |
| cg23807924 |                                    | 0.00043997  | -0.406074626 |
| cg19194405 | DDC;DDC                            | 0.000148457 | -0.406163073 |
| cg08122051 | WWOX                               | 0.007873393 | -0.406171397 |
| cg22106284 | POM121C                            | 7.23E-05    | -0.406225302 |
| cg26367031 | KCNMB3;KCNMB3;KCNMB3;KCNMB3        | 0.000117986 | -0.406268708 |
| cg19260718 |                                    | 0.000148457 | -0.4062794   |
| cg06925389 |                                    | 0.000187194 | -0.406418773 |
| cg25738350 |                                    | 0.00043997  | -0.406452524 |
| cg10518873 | WNT5B;WNT5B                        | 0.000117986 | -0.406561679 |
| cg04074908 | TMEM63B                            | 2.58E-05    | -0.406587861 |
| cg22344254 | LOC100133612                       | 9.24E-05    | -0.406750587 |
| cg02253978 | CMTM2                              | 0.000233422 | -0.406761402 |
| cg20969923 | NIN;NIN;NIN                        | 7.23E-05    | -0.406811179 |
| cg16727006 | ZCCHC14                            | 0.00041966  | -0.406901076 |
| cg07337598 | ANXA9                              | 2.58E-05    | -0.406940545 |
| cg13667124 |                                    | 5.59E-05    | -0.406983303 |
| cg16658412 | MAD1L1;MAD1L1;MAD1L1               | 2.80E-05    | -0.406984288 |
| cg27383859 | PDIA5;PDIA5                        | 9.24E-05    | -0.407008488 |
| cg24924051 | CMTM8                              | 0.00043997  | -0.407350866 |
| cg04083553 | GP9                                | 7.23E-05    | -0.407369124 |
| cg17353680 | KCNK12                             | 0.000233422 | -0.40749564  |
| cg06829157 |                                    | 0.000148457 | -0.407506364 |
| cg17988326 | RIMS3                              | 2.58E-05    | -0.407568858 |
| cg10154880 | TRRAP                              | 0.000537905 | -0.407571382 |
| cg21923959 | POU2AF1                            | 5.59E-05    | -0.407586324 |
| cg12200164 | TNFAIP3                            | 0.000955793 | -0.407627758 |
| cg18183671 | ARPP-21;ARPP-21;ARPP-21;ARPP-21    | 0.005897668 | -0.407677218 |
| cg19310167 |                                    | 8.60E-06    | -0.407689017 |
| cg07456815 | XKR4                               | 8.60E-06    | -0.407935511 |
| cg15719903 | TAPBPL                             | 7.23E-05    | -0.408091561 |
| cg00324827 | MAPK10;MAPK10;MAPK10;MAPK10        | 0.000187194 | -0.408092134 |
| cg14921884 |                                    | 5.59E-05    | -0.408276111 |
| cg13643509 | RPTOR;RPTOR                        | 0.00043997  | -0.408594307 |
| cg17820022 | PLCH2                              | 0.000537905 | -0.408671859 |
| cg04522498 | TRAPPC9;TRAPPC9                    | 0.000290372 | -0.408691011 |
| cg05367967 |                                    | 0.000791389 | -0.408700646 |
| cg06469570 | ACOX3;ACOX3                        | 0.000148457 | -0.408750272 |
| cg17679987 | ZFPM2                              | 5.59E-05    | -0.408753968 |
| cg27072813 | SLC12A7                            | 5.59E-05    | -0.408849205 |
| cg14381994 |                                    | 0.000233422 | -0.408872166 |
| cg17910564 | VDAC3;VDAC3                        | 0.000290372 | -0.408928518 |
| cg00255699 | TRIT1                              | 0.000357885 | -0.408973804 |
| cg02617418 | GCET2;GCET2                        | 0.000290372 | -0.408976223 |
| cg00969893 | TLN2                               | 0.000148457 | -0.408995461 |
| cg07720334 | DNMT3A;DNMT3A;DNMT3A               | 7.23E-05    | -0.408997607 |
| cg02007534 |                                    | 0.000290372 | -0.409042663 |
| cg18912107 | TBPL1                              | 1.96E-05    | -0.409102469 |
| cg10694914 | POU2AF1                            | 3.34E-05    | -0.409146981 |
| cg18743793 | IKZF1                              | 0.000117986 | -0.409197113 |
| cg22664614 | CPA5;CPA5;CPA5                     | 0.000510765 | -0.409211396 |
| cg14905514 |                                    | 9.24E-05    | -0.409222684 |
| cg25844587 |                                    | 5.59E-05    | -0.409305468 |

|            |                                     |             |              |
|------------|-------------------------------------|-------------|--------------|
| cg03075156 | PRKCE                               | 0.000357885 | -0.409389298 |
| cg13471712 | PHF21A;PHF21A                       | 4.34E-05    | -0.409406978 |
| cg04794465 | APOM                                | 0.004357816 | -0.409545052 |
| cg19422205 | SEPT9;SEPT9;SEPT9;SEPT9;SEPT9       | 0.000955793 | -0.409567394 |
| cg05623815 |                                     | 0.000187194 | -0.409607872 |
| cg01389506 | SSH1;SSH1;SSH1                      | 0.000791389 | -0.409659917 |
| cg18676586 | TNFRSF17                            | 1.50E-05    | -0.409830265 |
| cg16875500 |                                     | 2.58E-05    | -0.410000072 |
| cg06431514 | CUGBP2;CUGBP2;CUGBP2;CUGBP2         | 0.000117986 | -0.410078093 |
| cg14957089 |                                     | 3.34E-05    | -0.410100226 |
| cg26839652 |                                     | 0.001147425 | -0.410163751 |
| cg00042325 | LOC728743                           | 4.34E-05    | -0.410205747 |
| cg21171115 | AKAP2;PALM2-AKAP2;PALM2-AKAP2;AKAP2 | 7.23E-05    | -0.410241079 |
| cg07633835 | FBXO18;FBXO18                       | 5.59E-05    | -0.410302206 |
| cg26889659 | EXOC2                               | 0.000233422 | -0.410363541 |
| cg17532753 | HDAC4                               | 7.23E-05    | -0.410366189 |
| cg22211917 | LAIR1;LAIR1                         | 3.34E-05    | -0.410385121 |
| cg01392180 | LYRM4;LYRM4                         | 0.001147425 | -0.410405323 |
| cg12391643 |                                     | 0.000148457 | -0.41044208  |
| cg09461851 | LMF1                                | 0.001147425 | -0.410468066 |
| cg27047494 |                                     | 4.34E-05    | -0.410479034 |
| cg03163759 | ANKRD11                             | 0.000233422 | -0.410490682 |
| cg23464041 | ITPR3                               | 0.000955793 | -0.410503798 |
| cg05584070 | CARS2                               | 0.004357816 | -0.410504119 |
| cg06529843 | GZMK                                | 0.006823935 | -0.410510977 |
| cg00256068 | PREX1                               | 0.00043997  | -0.410555393 |
| cg24045212 | MAD1L1;MAD1L1;MAD1L1                | 5.59E-05    | -0.410591688 |
| cg13868473 | MAD1L1;MAD1L1;MAD1L1                | 0.001639597 | -0.410632363 |
| cg20415945 | HDAC4                               | 0.003734675 | -0.410676481 |
| cg04681879 | RPTOR;RPTOR                         | 0.002714607 | -0.410680461 |
| cg16876219 |                                     | 4.34E-05    | -0.410715009 |
| cg15552491 |                                     | 0.001147425 | -0.410811294 |
| cg11846618 | BRF1                                | 0.000290372 | -0.410914677 |
| cg23558116 |                                     | 0.002714607 | -0.410931613 |
| cg08599437 |                                     | 9.24E-05    | -0.411082331 |
| cg18979491 | LBP                                 | 2.58E-05    | -0.411228817 |
| cg13713821 |                                     | 5.59E-05    | -0.411239021 |
| cg01311102 | PTGES2;PTGES2;PTGES2                | 1.96E-05    | -0.411300748 |
| cg18468844 | PTAFR;PTAFR;PTAFR;PTAFR             | 2.58E-05    | -0.411399059 |
| cg11898646 | EBF1                                | 0.001948248 | -0.411493923 |
| cg01603073 |                                     | 0.000117986 | -0.411502838 |
| cg12771187 |                                     | 9.24E-05    | -0.411522458 |
| cg18148156 | LIPF                                | 0.000117986 | -0.41155301  |
| cg10784511 | AGTR1;AGTR1;AGTR1;AGTR1             | 4.34E-05    | -0.411564067 |
| cg19091930 | LRRC14B                             | 0.000791389 | -0.411575975 |
| cg23669440 | A4GNT                               | 1.96E-05    | -0.411633268 |
| cg26776806 | CBFA2T3;CBFA2T3                     | 0.000148457 | -0.411742408 |
| cg26308704 | PTPRN2;PTPRN2;MIR595;PTPRN2         | 0.000290372 | -0.411749443 |
| cg22156899 | SECTM1                              | 4.34E-05    | -0.411756875 |
| cg21356630 | TTLL2                               | 2.58E-05    | -0.41176822  |
| cg09552510 | MPEG1                               | 0.001147425 | -0.411802195 |
| cg19513987 | MAD1L1;MAD1L1;MAD1L1                | 0.000537905 | -0.411852744 |
| cg04545079 | CTCF                                | 0.00043997  | -0.411903838 |
| cg17254229 |                                     | 3.34E-05    | -0.411903935 |
| cg18384277 | LTB;LTB                             | 0.000290372 | -0.411938492 |
| cg09201499 | FAM38A                              | 0.000357885 | -0.412008808 |
| cg01027405 | IL7R                                | 0.000357885 | -0.412299771 |
| cg23192749 |                                     | 0.000148457 | -0.41248154  |
| cg08140114 | HECA                                | 0.000537905 | -0.412557469 |
| cg13671536 |                                     | 0.000233422 | -0.412694593 |

|            |                               |             |              |
|------------|-------------------------------|-------------|--------------|
| cg20415092 |                               | 0.001376172 | -0.412697491 |
| cg15889594 |                               | 0.001639597 | -0.412705905 |
| cg01502811 |                               | 9.24E-05    | -0.412705997 |
| cg16286735 | ITGB3                         | 0.000117986 | -0.412708854 |
| cg09362796 | HTT                           | 0.000791389 | -0.412709961 |
| cg27566842 | ADARB2                        | 0.00043997  | -0.412714449 |
| cg26707052 |                               | 0.000148457 | -0.412768703 |
| cg17579089 | KIF9;KIF9;KIF9                | 5.59E-05    | -0.412883513 |
| cg01588379 | PRKAG2;PRKAG2                 | 0.000537905 | -0.412913976 |
| cg03800281 | LRRC20;LRRC20;LRRC20          | 0.001376172 | -0.412924266 |
| cg10337290 | ADAMTS7                       | 0.000654035 | -0.412956169 |
| cg23910341 |                               | 0.000654035 | -0.413019124 |
| cg08216099 | PXDN                          | 0.000233422 | -0.413033205 |
| cg01984854 |                               | 0.001147425 | -0.413119412 |
| cg23222617 | FOXN3;FOXN3                   | 4.34E-05    | -0.413176364 |
| cg19988482 |                               | 0.000654035 | -0.413204574 |
| cg10064525 | FNDC7                         | 3.34E-05    | -0.413207515 |
| cg16902863 | SSPO                          | 0.00043997  | -0.413271498 |
| cg24903893 | EBF1                          | 0.003189589 | -0.413283545 |
| cg02612971 |                               | 0.000148457 | -0.413293981 |
| cg04949429 | LHPP;LHPP                     | 3.34E-05    | -0.413388347 |
| cg24823222 |                               | 0.000148457 | -0.413458428 |
| cg25107522 | DGKD;DGKD                     | 9.24E-05    | -0.413479481 |
| cg08202743 | ABTB2                         | 7.23E-05    | -0.41367141  |
| cg02146383 | C16orf52                      | 0.009066563 | -0.413685982 |
| cg02835823 |                               | 3.34E-05    | -0.413697646 |
| cg17128308 | STX18                         | 3.34E-05    | -0.413840624 |
| cg01296705 | HRH2;HRH2                     | 0.000187194 | -0.413909878 |
| cg03357721 | ARHGEF7;ARHGEF7               | 0.001376172 | -0.41408177  |
| cg12424383 |                               | 0.000187194 | -0.414089122 |
| cg17487741 | RCBTB1                        | 7.23E-05    | -0.41411077  |
| cg26714263 | RPTOR;RPTOR                   | 7.23E-05    | -0.414216036 |
| cg05036615 | PHTF2;PHTF2;PHTF2;PHTF2;PHTF2 | 0.000148457 | -0.414412273 |
| cg23413954 | SERINC5                       | 7.23E-05    | -0.414530514 |
| cg12266861 |                               | 0.000117986 | -0.41453826  |
| cg02088785 | STK24                         | 0.000117986 | -0.414588913 |
| cg10983484 | LYSMD2;LYSMD2                 | 7.23E-05    | -0.414599947 |
| cg27354893 |                               | 0.00043997  | -0.414606901 |
| cg11354682 | C19orf38                      | 5.59E-05    | -0.414633582 |
| cg25821399 | C3orf37;C3orf37               | 5.59E-05    | -0.414711983 |
| cg26946311 | DECR2                         | 7.23E-05    | -0.414825429 |
| cg02903589 | KDM1B                         | 2.58E-05    | -0.414866179 |
| cg06287775 | FOXK1                         | 0.000357885 | -0.414872183 |
| cg04207746 |                               | 0.000187194 | -0.414966271 |
| cg00412094 | SH3BP2                        | 4.34E-05    | -0.414987708 |
| cg23493867 | SYNPO2;SYNPO2;SYNPO2          | 0.000148457 | -0.415161238 |
| cg03134661 | UHRF1;UHRF1                   | 0.000654035 | -0.415474981 |
| cg10311020 | ABI1;ABI1;ABI1;ABI1           | 0.000148457 | -0.415494119 |
| cg17022488 |                               | 0.000117986 | -0.415581865 |
| cg07491702 | CDAN1                         | 0.003189589 | -0.415659474 |
| cg03540329 | GK5                           | 0.000117986 | -0.415688398 |
| cg13500819 | MGC29506                      | 2.58E-05    | -0.415776203 |
| cg12840818 | NRXN2;NRXN2                   | 1.50E-05    | -0.415915117 |
| cg25278786 | GUK1;GUK1;GUK1                | 0.000187194 | -0.416114683 |
| cg27561099 | MAP3K13                       | 8.60E-06    | -0.416143224 |
| cg13521170 | BCL2                          | 0.000357885 | -0.416389754 |
| cg19983801 | MUC4;MUC4;MUC4;MUC4;MUC4;MUC4 | 0.000187194 | -0.416405245 |
| cg24517738 | RIMS3                         | 0.000148457 | -0.41653544  |
| cg09817283 | IQCE;IQCE                     | 5.59E-05    | -0.416642674 |
| cg07319459 |                               | 2.58E-05    | -0.416835981 |



|            |                                         |             |              |
|------------|-----------------------------------------|-------------|--------------|
| cg14763104 | CD81                                    | 2.58E-05    | -0.416863789 |
| cg03302822 | C10orf28                                | 7.23E-05    | -0.416885748 |
| cg12150931 | ZNF385A;ZNF385A                         | 0.001639597 | -0.416926357 |
| cg24065451 | ETS1                                    | 0.000233422 | -0.416970601 |
| cg26004235 | KIAA1949;NRM;KIAA1949                   | 2.58E-05    | -0.4170599   |
| cg04994970 | COX8C;KIAA1409                          | 0.006823935 | -0.417140892 |
| cg26328150 | TRAPPC9;TRAPPC9                         | 0.001147425 | -0.417217988 |
| cg11035730 |                                         | 7.23E-05    | -0.417447968 |
| cg15411840 | CCDC162                                 | 5.59E-05    | -0.417453439 |
| cg26565476 | RAB11FIP1;RAB11FIP1;RAB11FIP1;RAB11FIP1 | 0.000187194 | -0.417514579 |
| cg22059211 |                                         | 0.002304201 | -0.417517461 |
| cg14364926 | ZER1                                    | 0.000187194 | -0.417538132 |
| cg07061368 | FKBP5;FKBP5;FKBP5;FKBP5                 | 0.000654035 | -0.417549369 |
| cg08893087 | FAM69A                                  | 4.34E-05    | -0.417551223 |
| cg01997884 |                                         | 0.000148457 | -0.417577184 |
| cg13888445 | AK1                                     | 0.000233422 | -0.417698265 |
| cg07308257 | EEPD1                                   | 0.000955793 | -0.417728608 |
| cg19573599 |                                         | 7.23E-05    | -0.417753519 |
| cg26598348 |                                         | 0.000148457 | -0.417763805 |
| cg15765353 |                                         | 0.001639597 | -0.417803721 |
| cg04338890 |                                         | 0.000233422 | -0.417806113 |
| cg18891604 |                                         | 9.24E-05    | -0.417838123 |
| cg14456143 | GEN1;GEN1                               | 0.001376172 | -0.417839551 |
| cg04336905 | DIP2C                                   | 0.003734675 | -0.417850598 |
| cg21848117 | SLC38A10;SLC38A10                       | 4.34E-05    | -0.417898869 |
| cg16312609 |                                         | 0.000187194 | -0.417912276 |
| cg22013055 | LOC100134259                            | 4.34E-05    | -0.417932994 |
| cg13128443 |                                         | 0.000537905 | -0.418029866 |
| cg11105358 |                                         | 0.000791389 | -0.418039011 |
| cg04516672 | FAM53B                                  | 9.24E-05    | -0.418049695 |
| cg19317600 | ACOX3;ACOX3                             | 0.007873393 | -0.418126811 |
| cg20580833 | CRTAC1                                  | 0.000537905 | -0.418168108 |
| cg08428292 |                                         | 4.34E-05    | -0.418329362 |
| cg20793665 |                                         | 1.96E-05    | -0.41839068  |
| cg07611121 | TRIO                                    | 0.000187194 | -0.418425235 |
| cg21329649 | MAD1L1;MAD1L1;MAD1L1                    | 5.59E-05    | -0.418481227 |
| cg10803218 | N4BP3                                   | 0.000290372 | -0.418572514 |
| cg09145629 |                                         | 4.34E-05    | -0.418777738 |
| cg16784234 |                                         | 5.59E-05    | -0.418793845 |
| cg06861560 |                                         | 0.000148457 | -0.418880865 |
| cg07218880 | UPF3A;UPF3A                             | 2.58E-05    | -0.418956299 |
| cg27299033 | RTN4RL1                                 | 0.000357885 | -0.418995201 |
| cg16555866 | TBCD                                    | 2.58E-05    | -0.41907908  |
| cg24231380 | C2orf85                                 | 0.000955793 | -0.419139585 |
| cg18647268 | MACF1                                   | 0.000148457 | -0.419246117 |
| cg25556035 | NFIX                                    | 0.001376172 | -0.419424772 |
| cg08875297 |                                         | 0.000148457 | -0.419462162 |
| cg12682972 | MAP4K4;MAP4K4;MAP4K4                    | 1.96E-05    | -0.419588564 |
| cg15287850 | ST6GAL1;ST6GAL1;ST6GAL1                 | 0.000117986 | -0.419665162 |
| cg21133433 |                                         | 7.23E-05    | -0.419711311 |
| cg21442730 |                                         | 0.00043997  | -0.419727376 |
| cg19149132 |                                         | 0.000233422 | -0.419746682 |
| cg21733794 | BLCAP;BLCAP;BLCAP;BLCAP;BLCAP           | 0.000357885 | -0.419941324 |
| cg15833565 | ERI3                                    | 0.000290372 | -0.420008544 |
| cg18048309 | KIAA1688                                | 0.000357885 | -0.420299704 |
| cg08621773 |                                         | 4.34E-05    | -0.420319147 |
| cg01368900 | IQSEC1                                  | 1.96E-05    | -0.420541605 |
| cg01975786 |                                         | 0.000117986 | -0.420635555 |
| cg04855961 |                                         | 4.34E-05    | -0.420781534 |
| cg16722001 | VCL;VCL                                 | 0.000117986 | -0.420877105 |

|            |                                              |             |              |
|------------|----------------------------------------------|-------------|--------------|
| cg24688143 | PTPRN2;PTPRN2;PTPRN2                         | 0.000117986 | -0.421020126 |
| cg26692749 | RCAN3                                        | 7.23E-05    | -0.421064511 |
| cg01706991 | BAALC;BAALC                                  | 1.96E-05    | -0.421147974 |
| cg11793977 |                                              | 0.000148457 | -0.421227745 |
| cg11898431 |                                              | 1.50E-05    | -0.421254891 |
| cg11307565 | PXN;PXN                                      | 1.11E-05    | -0.421519299 |
| cg15348679 |                                              | 0.004878663 | -0.421536888 |
| cg26314399 | PLEKHG4B                                     | 0.001639597 | -0.421568315 |
| cg03773862 | ELMO1                                        | 0.000117986 | -0.421782952 |
| cg23079727 | VGLL4;ATG7;VGLL4;ATG7;VGLL4;ATG7;VGLL        | 0.000290372 | -0.421820607 |
| cg21577598 | CCDC57                                       | 3.34E-05    | -0.421869803 |
| cg18406792 | C18orf1;C18orf1;C18orf1;C18orf1;C18orf1;C18o | 4.34E-05    | -0.421889519 |
| cg00385956 | NPHP4                                        | 0.002304201 | -0.42190867  |
| cg09305113 | RPS6KA2                                      | 0.000117986 | -0.421938063 |
| cg07303805 | NOMO1                                        | 5.59E-05    | -0.421978625 |
| cg16711597 | STK24                                        | 0.000791389 | -0.421978705 |
| cg22175624 | TBCD                                         | 7.23E-05    | -0.422030968 |
| cg06508085 |                                              | 9.24E-05    | -0.422046034 |
| cg03366285 | FSD2;FSD2                                    | 0.000148457 | -0.422070153 |
| cg23531734 | LOC100130691                                 | 0.000148457 | -0.422153801 |
| cg07394914 | IRF2                                         | 0.000148457 | -0.422258663 |
| cg26513654 | SNX10                                        | 0.001948248 | -0.422283958 |
| cg08075528 | CSNK1G2                                      | 0.005742788 | -0.422374863 |
| cg07446753 |                                              | 9.24E-05    | -0.42241427  |
| cg16536740 |                                              | 4.34E-05    | -0.422549628 |
| cg02057796 | CYGB                                         | 5.11E-05    | -0.422781941 |
| cg12453504 | IRF2                                         | 0.000233422 | -0.422788015 |
| cg09693588 |                                              | 2.58E-05    | -0.422855855 |
| cg20438460 |                                              | 0.000148457 | -0.423025449 |
| cg08428188 |                                              | 0.000233422 | -0.423078625 |
| cg18069144 |                                              | 0.000955793 | -0.42311073  |
| cg16409368 | IMPDH1;IMPDH1;IMPDH1;IMPDH1;IMPDH1;IM        | 0.000117986 | -0.423144872 |
| cg22082015 | NR1D1                                        | 0.000117986 | -0.423174702 |
| cg15417287 |                                              | 4.34E-05    | -0.423306361 |
| cg00226923 | FGD2                                         | 1.96E-05    | -0.423369203 |
| cg05433111 | CD19                                         | 0.000117986 | -0.423373891 |
| cg16005592 |                                              | 2.58E-05    | -0.423420768 |
| cg25958098 | SLC12A6;SLC12A6;SLC12A6;SLC12A6;SLC12        | 0.000187194 | -0.423534852 |
| cg11256132 | C1orf100                                     | 0.000654035 | -0.423655011 |
| cg20097219 | TBC1D16                                      | 2.58E-05    | -0.423727909 |
| cg14613361 |                                              | 7.23E-05    | -0.423788555 |
| cg14129169 | ZNF788                                       | 4.34E-05    | -0.423797994 |
| cg13947310 | PLXNA4;PLXNA4                                | 0.00043997  | -0.423860146 |
| cg22881435 | RAB11FIP1;RAB11FIP1;RAB11FIP1                | 2.58E-05    | -0.423863933 |
| cg11908155 | NEIL2;NEIL2;NEIL2;NEIL2                      | 4.34E-05    | -0.42391608  |
| cg23882164 |                                              | 7.23E-05    | -0.423936402 |
| cg14631438 | KCNJ1;KCNJ1;KCNJ1;KCNJ1                      | 5.59E-05    | -0.424006585 |
| cg18393175 |                                              | 0.000357885 | -0.424031496 |
| cg17515767 | ADPRHL1;ADPRHL1                              | 0.000117986 | -0.424134812 |
| cg14557690 | UAP1L1                                       | 9.24E-05    | -0.424198189 |
| cg08063160 | LRRFIP1                                      | 4.34E-05    | -0.424223903 |
| cg21741081 | ZP1                                          | 0.001147425 | -0.424243303 |
| cg20666585 |                                              | 9.24E-05    | -0.424263519 |
| cg00178728 | GPR125                                       | 0.002304201 | -0.424335419 |
| cg18452449 | TLR9                                         | 3.34E-05    | -0.424341678 |
| cg20387392 | ZBTB20;ZBTB20;ZBTB20;ZBTB20                  | 0.001639597 | -0.424349057 |
| cg15416352 | MNT                                          | 0.000233422 | -0.424354432 |
| cg24804106 | PSD3                                         | 0.000357885 | -0.424393968 |
| cg02142900 |                                              | 2.58E-05    | -0.424446593 |
| cg03145274 | SLC45A1                                      | 9.24E-05    | -0.424470522 |

|            |                                    |             |              |
|------------|------------------------------------|-------------|--------------|
| cg19882315 | BLK;BLK                            | 0.000148457 | -0.424758542 |
| cg06960941 | GPR144                             | 3.34E-05    | -0.424883864 |
| cg11170796 | TCF3;TCF3                          | 0.000357885 | -0.425061573 |
| cg19048010 | SSH2                               | 0.000233422 | -0.425101364 |
| cg17479280 | MEF2D                              | 4.34E-05    | -0.425129002 |
| cg10869531 | SH3BP2                             | 7.23E-05    | -0.425326063 |
| cg16462433 |                                    | 4.34E-05    | -0.425375726 |
| cg09173565 | RPTOR;RPTOR                        | 0.001948248 | -0.425388027 |
| cg23204276 | AP1B1;AP1B1;SNORD125;AP1B1         | 5.59E-05    | -0.425423829 |
| cg04505348 | ADAM33;ADAM33                      | 0.000233422 | -0.425435545 |
| cg01858089 |                                    | 0.001639597 | -0.425498552 |
| cg05707116 | EIF2AK3                            | 0.00043997  | -0.425511998 |
| cg02743256 | MAD1L1;MAD1L1;MAD1L1               | 0.000187194 | -0.425543314 |
| cg26382697 | CD81                               | 5.59E-05    | -0.425605817 |
| cg19004971 | PAG1                               | 0.000187194 | -0.425649887 |
| cg14536906 | NEK6;NEK6;NEK6;NEK6;NEK6;NEK6;NEK6 | 2.08E-05    | -0.425669073 |
| cg01977762 | UHRF1;UHRF1                        | 2.58E-05    | -0.425977113 |
| cg15997518 |                                    | 4.34E-05    | -0.425985961 |
| cg12961889 |                                    | 7.23E-05    | -0.425996869 |
| cg05180258 | NUMB;NUMB;NUMB;NUMB                | 0.000117986 | -0.426089144 |
| cg13699650 |                                    | 2.58E-05    | -0.426223062 |
| cg18152830 | TNFRSF13B                          | 4.34E-05    | -0.42622523  |
| cg16576160 |                                    | 3.34E-05    | -0.426290812 |
| cg08203192 | PRKCE                              | 0.000117986 | -0.426427506 |
| cg01449469 | KIAA1949;KIAA1949                  | 0.000187194 | -0.42666869  |
| cg11630392 | GPR171;MED12L;GPR171               | 1.50E-05    | -0.4267588   |
| cg01391022 | WDR66                              | 0.000290372 | -0.426957912 |
| cg04737759 |                                    | 5.59E-05    | -0.426972277 |
| cg00999904 | ALLC                               | 0.000290372 | -0.427075165 |
| cg03840351 | PDCD6                              | 0.000233422 | -0.427123793 |
| cg23736297 | RPTOR;RPTOR                        | 7.23E-05    | -0.427134423 |
| cg23367351 | MAD1L1;MAD1L1;MAD1L1               | 2.58E-05    | -0.427139798 |
| cg10962223 |                                    | 1.96E-05    | -0.427154321 |
| cg17184161 | TBCD                               | 0.000187194 | -0.427263486 |
| cg12592387 |                                    | 9.24E-05    | -0.427303778 |
| cg01981433 | TNFAIP3                            | 0.000654035 | -0.427353036 |
| cg08002791 | GPR133                             | 0.000148457 | -0.427450061 |
| cg03161498 |                                    | 8.60E-06    | -0.427569591 |
| cg11341011 |                                    | 0.000117986 | -0.427662626 |
| cg15207662 | HRH2;HRH2                          | 0.000187194 | -0.427776721 |
| cg08497772 |                                    | 2.58E-05    | -0.42785241  |
| cg17477946 | TBCD                               | 0.000537905 | -0.427869111 |
| cg17845669 |                                    | 0.000955793 | -0.427871683 |
| cg19905757 | CORO2B                             | 3.34E-05    | -0.428051721 |
| cg21688152 | B3GNTL1                            | 0.000187194 | -0.428177854 |
| cg06522833 | NAA15                              | 0.000654035 | -0.428224831 |
| cg07546334 |                                    | 9.24E-05    | -0.428295124 |
| cg23174662 | HIF1A;HIF1A                        | 7.23E-05    | -0.428301677 |
| cg06639923 | FBXL18                             | 9.24E-05    | -0.42840381  |
| cg08876518 | CMIP;CMIP                          | 0.003189589 | -0.428523881 |
| cg18338046 | TCF7;TCF7;TCF7;TCF7;TCF7;TCF7;TCF7 | 4.34E-05    | -0.428529148 |
| cg22110998 |                                    | 9.24E-05    | -0.428566666 |
| cg02482003 |                                    | 0.000791389 | -0.428567478 |
| cg24135923 |                                    | 0.005897668 | -0.428599398 |
| cg02393092 | SET                                | 0.001948248 | -0.428641522 |
| cg22702334 | PLEKHG4B                           | 0.000791389 | -0.428658578 |
| cg19602452 | SPRR4                              | 0.003486652 | -0.428660757 |
| cg01542019 | TECR                               | 0.003734675 | -0.428673009 |
| cg21261158 | RASA3                              | 0.000654035 | -0.428791922 |
| cg01192077 | EBF1                               | 0.002304201 | -0.428947445 |

|            |                                           |             |              |
|------------|-------------------------------------------|-------------|--------------|
| cg05524458 | ANKRD33B                                  | 9.24E-05    | -0.42911055  |
| cg02744046 | LIPC                                      | 0.000537905 | -0.429253282 |
| cg03282107 |                                           | 4.34E-05    | -0.429258332 |
| cg01829163 | SLC7A5                                    | 0.000233422 | -0.429280637 |
| cg19089328 | NADSYN1                                   | 4.34E-05    | -0.429489818 |
| cg10673192 | TRAPPC9;TRAPPC9                           | 0.000233422 | -0.42953458  |
| cg12774454 | ABLIM2;ABLIM2;ABLIM2;ABLIM2;ABLIM2;ABLIM2 | 0.000233422 | -0.429562179 |
| cg01965380 | LRR8D;LRR8D                               | 3.34E-05    | -0.429818968 |
| cg24691891 | PHC2                                      | 0.000233422 | -0.429929898 |
| cg08006309 | IFT140;TMEM204                            | 0.000537905 | -0.430074466 |
| cg03653585 | DLC1;DLC1;DLC1                            | 0.000187194 | -0.430099948 |
| cg05794411 | COX8C;KIAA1409                            | 0.006823935 | -0.430205609 |
| cg05991442 | RECQL5;LOC643008;LOC643008                | 0.001291055 | -0.430370709 |
| cg21165812 |                                           | 3.34E-05    | -0.430519397 |
| cg13740598 | LSM4                                      | 0.000187194 | -0.43054095  |
| cg23881099 |                                           | 0.003734675 | -0.430557077 |
| cg08559364 | VGLL4;VGLL4                               | 0.000955793 | -0.430691979 |
| cg27052418 |                                           | 0.004357816 | -0.430856553 |
| cg03736062 | TIFA                                      | 9.24E-05    | -0.431150104 |
| cg17002328 | CCDC88C                                   | 5.59E-05    | -0.431210919 |
| cg02811473 | PPP1R16B                                  | 0.000117986 | -0.431260085 |
| cg08579962 |                                           | 5.59E-05    | -0.431518908 |
| cg03818572 |                                           | 7.23E-05    | -0.43156247  |
| cg05113898 | RPTOR;RPTOR                               | 0.000290372 | -0.431600078 |
| cg14102807 | CD19                                      | 0.000148457 | -0.431685785 |
| cg11298144 | PLEKHG4B                                  | 0.001376172 | -0.431689959 |
| cg02448743 | KAZALD1                                   | 9.24E-05    | -0.43170499  |
| cg02505099 | SEMA5B                                    | 0.000148457 | -0.431742903 |
| cg11680908 |                                           | 0.000290372 | -0.431743352 |
| cg01868869 |                                           | 0.004357816 | -0.431827457 |
| cg26035201 | PSMG3;PSMG3                               | 0.000148457 | -0.431834277 |
| cg10678215 | HMHB1                                     | 0.000117986 | -0.431907083 |
| cg01824412 |                                           | 0.004357816 | -0.432009032 |
| cg15121276 | CLPTM1L                                   | 0.009066563 | -0.432038869 |
| cg12926910 | MACC1                                     | 0.000537905 | -0.432083073 |
| cg15914335 | PXDN                                      | 9.24E-05    | -0.432127086 |
| cg05921699 | CD79A;CD79A                               | 0.000117986 | -0.432164955 |
| cg14606478 | TRIM26                                    | 5.59E-05    | -0.432169115 |
| cg08009711 | C2CD2;C2CD2                               | 1.96E-05    | -0.432247617 |
| cg01554316 | GALNT2                                    | 0.001639597 | -0.432375724 |
| cg01345354 | SERPINB9                                  | 0.005897668 | -0.432688678 |
| cg16779976 | BLNK;BLNK                                 | 0.00043997  | -0.432699806 |
| cg08766762 |                                           | 5.59E-05    | -0.432782012 |
| cg04820773 |                                           | 5.59E-05    | -0.432797871 |
| cg18169610 | CD81                                      | 2.58E-05    | -0.432837194 |
| cg10068403 |                                           | 0.00043997  | -0.432863147 |
| cg26583584 |                                           | 5.59E-05    | -0.43307066  |
| cg01394349 | CAPN8                                     | 0.001061731 | -0.43329909  |
| cg20841436 | PACRG;PACRG;PACRG                         | 1.96E-05    | -0.433345925 |
| cg24336808 |                                           | 0.000117986 | -0.433458663 |
| cg21811284 | SEC14L1;SEC14L1;SEC14L1;SEC14L1;SEC14L1   | 3.34E-05    | -0.433626095 |
| cg13751548 | PAX5                                      | 1.50E-05    | -0.43366968  |
| cg18072388 | RAVER1                                    | 1.96E-05    | -0.433699969 |
| cg01203457 | BRD1                                      | 9.24E-05    | -0.433806499 |
| cg21193975 | WDR5;WDR5                                 | 0.001147425 | -0.433850927 |
| cg06454410 | ZGLP1                                     | 1.11E-05    | -0.433880237 |
| cg01299332 |                                           | 7.23E-05    | -0.433974738 |
| cg16185947 |                                           | 0.000148457 | -0.434022839 |
| cg16410524 | RCSD1                                     | 0.001948248 | -0.434089693 |
| cg26870057 |                                           | 9.24E-05    | -0.434136653 |

|            |                                       |             |              |
|------------|---------------------------------------|-------------|--------------|
| cg03384915 | SIN3B                                 | 0.000537905 | -0.434299397 |
| cg05302701 | NFATC1;NFATC1;NFATC1;NFATC1;NFATC1    | 0.000233422 | -0.434500106 |
| cg26249168 |                                       | 0.000955793 | -0.434564131 |
| cg17200850 | HRH2;HRH2                             | 0.000654035 | -0.434772183 |
| cg08024174 |                                       | 0.000233422 | -0.435063774 |
| cg26657404 | KIAA0182;KIAA0182                     | 9.24E-05    | -0.435079951 |
| cg24981097 | STK24                                 | 5.59E-05    | -0.435128997 |
| cg07053162 | PPL                                   | 4.34E-05    | -0.435148208 |
| cg22747994 | KCNK4                                 | 3.34E-05    | -0.435162105 |
| cg20931965 | HIF1A;HIF1A                           | 2.58E-05    | -0.435255705 |
| cg16071091 | NFATC1;NFATC1;NFATC1;NFATC1;NFATC1    | 0.000537905 | -0.435314328 |
| cg00649632 | ABCC1;ABCC1;ABCC1;ABCC1;ABCC1         | 0.000148457 | -0.435341315 |
| cg09139509 | RPTOR;RPTOR                           | 4.34E-05    | -0.435346319 |
| cg03914925 |                                       | 0.001147425 | -0.435362939 |
| cg00870269 | LIPC                                  | 0.000654035 | -0.435422339 |
| cg21547557 | C21orf33;C21orf33                     | 3.34E-05    | -0.435473193 |
| cg19668724 |                                       | 0.000357885 | -0.435676633 |
| cg19004465 | TBC1D16                               | 0.000654035 | -0.435844213 |
| cg05615150 | ARPP-21                               | 0.000654035 | -0.436263942 |
| cg01098955 |                                       | 0.000290372 | -0.43631863  |
| cg17110675 |                                       | 0.000117986 | -0.436397207 |
| cg20943353 | MAD1L1;MAD1L1;MAD1L1                  | 0.001376172 | -0.436409338 |
| cg07929956 | ST3GAL2                               | 5.59E-05    | -0.436460677 |
| cg27043141 | GCET2;GCET2                           | 0.000187194 | -0.436470445 |
| cg23645046 |                                       | 4.34E-05    | -0.436514937 |
| cg19174554 | DIAPH3                                | 0.000357885 | -0.436626233 |
| cg10318744 |                                       | 4.34E-05    | -0.436657445 |
| cg08622666 | RANBP9                                | 7.23E-05    | -0.436829309 |
| cg17192381 | BCL2                                  | 0.000117986 | -0.437053947 |
| cg19624425 |                                       | 0.000955793 | -0.437436316 |
| cg02156723 |                                       | 5.59E-05    | -0.437465283 |
| cg10863922 | SERPINB9                              | 0.007873393 | -0.437499945 |
| cg09375756 | DEAF1                                 | 0.000654035 | -0.437507605 |
| cg13477178 | DIP2C                                 | 7.23E-05    | -0.437521821 |
| cg05830220 | KLHDC4                                | 0.000148457 | -0.437543716 |
| cg03096954 |                                       | 2.58E-05    | -0.437648349 |
| cg21868798 |                                       | 0.000654035 | -0.437838802 |
| cg20604028 |                                       | 0.000233422 | -0.437962737 |
| cg23007665 | C7orf44                               | 1.11E-05    | -0.437983526 |
| cg10548805 |                                       | 0.000290372 | -0.438275921 |
| cg26574610 | VPREB3                                | 5.59E-05    | -0.438394503 |
| cg10557584 | SLFNL1;SLFNL1                         | 9.24E-05    | -0.438520414 |
| cg03540589 | CSRNP1                                | 7.23E-05    | -0.438561023 |
| cg06806158 | RPS6KA2;RPS6KA2                       | 0.001147425 | -0.438769089 |
| cg02452552 |                                       | 0.00041966  | -0.438933186 |
| cg02482730 | SEPT9;SEPT9;SEPT9;SEPT9;SEPT9;SEPT9;S | 0.00043997  | -0.438958877 |
| cg02563364 |                                       | 2.58E-05    | -0.439097634 |
| cg01516792 | RPTOR;RPTOR                           | 7.23E-05    | -0.439099746 |
| cg16695253 | BANP;BANP                             | 0.001147425 | -0.439100122 |
| cg21720802 | PELI3;PELI3                           | 3.34E-05    | -0.439246237 |
| cg24630825 | GPM6A;GPM6A                           | 1.11E-05    | -0.439329623 |
| cg21830221 | HIVEP3;HIVEP3                         | 7.23E-05    | -0.439463395 |
| cg09909478 | ABR                                   | 4.34E-05    | -0.439502215 |
| cg17218041 | ATP11A;ATP11A                         | 0.000233422 | -0.439532015 |
| cg00411413 | CDH13                                 | 0.003760629 | -0.439532128 |
| cg21546950 | AK5;AK5                               | 0.00043997  | -0.439571098 |
| cg24466100 | CLIC4                                 | 0.003189589 | -0.439695209 |
| cg08897688 | GSG1;GSG1                             | 0.001948248 | -0.439702968 |
| cg08210507 | MAD1L1;MAD1L1;MAD1L1                  | 0.000290372 | -0.439709178 |
| cg19708055 |                                       | 9.24E-05    | -0.439834067 |

|            |                                        |             |              |
|------------|----------------------------------------|-------------|--------------|
| cg00770754 | ANKRD11                                | 0.000654035 | -0.440039065 |
| cg23185774 | FGD2                                   | 1.96E-05    | -0.440192819 |
| cg23275914 | TTL10;TTL10                            | 2.58E-05    | -0.440211099 |
| cg00516030 | CTGF                                   | 0.000654035 | -0.440236329 |
| cg26527263 |                                        | 7.23E-05    | -0.440294601 |
| cg04499011 | FGD2                                   | 2.58E-05    | -0.440386792 |
| cg22835851 | WDFY4                                  | 0.000117986 | -0.440483516 |
| cg09299082 | MYL4;MYL4                              | 4.34E-05    | -0.440678499 |
| cg02988730 | AMPD2;AMPD2;AMPD2                      | 2.58E-05    | -0.440697125 |
| cg00416882 | PIAS2;PIAS2                            | 0.000148457 | -0.440724333 |
| cg07015784 | SLC11A1                                | 5.59E-05    | -0.440791241 |
| cg18495884 | MAD1L1;MAD1L1;MAD1L1                   | 0.000117986 | -0.440826439 |
| cg16522412 |                                        | 7.23E-05    | -0.440843775 |
| cg07466463 | EIF2C2;EIF2C2                          | 0.000117986 | -0.440861972 |
| cg14573810 | MEGF11                                 | 0.001147425 | -0.440956013 |
| cg17920789 | LRCH1;LRCH1;LRCH1                      | 0.000290372 | -0.441039664 |
| cg17519749 | MYT1L                                  | 3.34E-05    | -0.441117201 |
| cg02650080 | C3orf21                                | 4.34E-05    | -0.441147439 |
| cg23816537 | ZP1                                    | 4.34E-05    | -0.441671816 |
| cg02928840 | PLXNA2                                 | 2.58E-05    | -0.441828544 |
| cg01323104 | AFF1;AFF1                              | 5.59E-05    | -0.441904365 |
| cg08070491 | SP2                                    | 0.001147425 | -0.441914126 |
| cg01988602 |                                        | 0.000537905 | -0.441949558 |
| cg04003327 | ESPNL;SCLY                             | 0.000955793 | -0.441977723 |
| cg07102001 | LOC100129637                           | 4.34E-05    | -0.442038025 |
| cg00390724 |                                        | 1.96E-05    | -0.442054461 |
| cg13076829 |                                        | 1.96E-05    | -0.442141605 |
| cg14875327 |                                        | 0.000290372 | -0.442203188 |
| cg02426739 |                                        | 0.00043997  | -0.442242716 |
| cg09276655 | LOC100129637                           | 0.000187194 | -0.442308564 |
| cg16323293 | PACRG;PACRG;PACRG                      | 0.000357885 | -0.442309162 |
| cg25817701 | MAD1L1;MAD1L1;MAD1L1                   | 4.34E-05    | -0.442347668 |
| cg14866547 | EYA4;EYA4;EYA4                         | 7.23E-05    | -0.442422239 |
| cg06469955 | RPTOR;RPTOR                            | 4.34E-05    | -0.442543987 |
| cg04541228 | NEIL2;NEIL2;NEIL2;NEIL2                | 0.000526175 | -0.442570409 |
| cg17161520 | TBC1D10C                               | 1.50E-05    | -0.44257066  |
| cg10022248 |                                        | 2.58E-05    | -0.442589351 |
| cg21118486 | RPS6KA2                                | 0.000117986 | -0.442709749 |
| cg05856556 | LOC728743                              | 5.59E-05    | -0.44277475  |
| cg27168131 | PDE9A;PDE9A;PDE9A;PDE9A;PDE9A;PDE9A;   | 0.000187194 | -0.442865228 |
| cg26724841 | RNF216;RNF216                          | 4.34E-05    | -0.442872122 |
| cg04421348 | SH2D4B;SH2D4B                          | 0.000117986 | -0.44313491  |
| cg25072766 | CARS;CARS;CARS;CARS                    | 3.21E-05    | -0.443259637 |
| cg07145038 |                                        | 0.000290372 | -0.443279022 |
| cg10834480 | TRAF3IP2;TRAF3IP2;TRAF3IP2             | 3.34E-05    | -0.443366836 |
| cg03138446 | SLC27A3                                | 0.000148457 | -0.443407333 |
| cg01702009 | PTCRA;PTCRA                            | 7.23E-05    | -0.443659562 |
| cg11937508 | GPR1;GPR1                              | 0.000357885 | -0.443694303 |
| cg06883279 |                                        | 0.000357885 | -0.443794845 |
| cg20278154 | CHST11                                 | 0.000290372 | -0.443923088 |
| cg15860235 | SH3BP2                                 | 7.23E-05    | -0.444046286 |
| cg11858499 | A4GALT                                 | 5.59E-05    | -0.444049338 |
| cg19771748 |                                        | 5.59E-05    | -0.444135977 |
| cg11051295 |                                        | 0.000148457 | -0.444188653 |
| cg24011341 | SOX5                                   | 0.000290372 | -0.444301162 |
| cg05707833 | NFATC1;NFATC1;NFATC1;NFATC1;NFATC1     | 1.96E-05    | -0.444342562 |
| cg17333291 | GPOR;C7orf50;C7orf50;GPOR;C7orf50;GPOR | 2.58E-05    | -0.444395827 |
| cg22335802 | IFI16                                  | 0.000946184 | -0.444599918 |
| cg08428868 |                                        | 2.58E-05    | -0.444737854 |
| cg07768103 | RNF44                                  | 0.000233422 | -0.444936487 |

|            |                                                 |             |              |
|------------|-------------------------------------------------|-------------|--------------|
| cg24869834 | SLC7A11                                         | 0.000117986 | -0.44494008  |
| cg00293644 | DCDC2B                                          | 7.23E-05    | -0.444967073 |
| cg08946854 |                                                 | 0.001948248 | -0.44498908  |
| cg11699517 | BAHCC1                                          | 2.58E-05    | -0.44499983  |
| cg09841898 | MAP4K5;MAP4K5                                   | 0.000537905 | -0.445146982 |
| cg07078269 | PLXND1                                          | 2.58E-05    | -0.445379429 |
| cg25589371 |                                                 | 7.23E-05    | -0.44556708  |
| cg00424286 | RPS6KA2;RPS6KA2                                 | 0.000148457 | -0.445593913 |
| cg15025569 | F2RL3                                           | 0.000537905 | -0.445846657 |
| cg03353699 | KIAA1949;KIAA1949                               | 7.23E-05    | -0.446049023 |
| cg01692110 | ATP11A;ATP11A                                   | 9.24E-05    | -0.446075956 |
| cg01588250 |                                                 | 0.000117986 | -0.44610345  |
| cg00536718 |                                                 | 0.000117986 | -0.446267416 |
| cg20805133 | PDCD1                                           | 0.002714607 | -0.446278721 |
| cg21987515 | FBXW7;FBXW7;FBXW7                               | 4.34E-05    | -0.44638968  |
| cg01551441 | EBF1                                            | 9.24E-05    | -0.44645953  |
| cg14276730 | CHD6                                            | 0.000117986 | -0.446484808 |
| cg14841514 | ZMIZ1                                           | 0.000290372 | -0.446508723 |
| cg25134567 | PRKCA;MIR634                                    | 3.34E-05    | -0.446525359 |
| cg20951650 | IRS1                                            | 0.000187194 | -0.446536048 |
| cg09459774 | FOXP1;FOXP1                                     | 0.005897668 | -0.446606668 |
| cg19471856 | LAMB4                                           | 0.000290372 | -0.446678098 |
| cg25709789 | TAOK1                                           | 0.00043997  | -0.446703005 |
| cg10435235 | ARHGEF7;ARHGEF7                                 | 0.000233422 | -0.446744399 |
| cg20618826 | ZCCHC24                                         | 0.000187194 | -0.446822306 |
| cg13036546 | HLA-E                                           | 7.23E-05    | -0.44685681  |
| cg11895835 | C5orf13;C5orf13;C5orf13;C5orf13;C5orf13;C5orf13 | 4.34E-05    | -0.446878084 |
| cg15659527 | TTC7A                                           | 0.000357885 | -0.446882841 |
| cg09009070 | AUTS2;AUTS2                                     | 9.24E-05    | -0.446935606 |
| cg14085952 |                                                 | 5.59E-05    | -0.446983902 |
| cg13482010 | SEMA5B                                          | 4.34E-05    | -0.44713263  |
| cg14078070 | RPS6KA2                                         | 4.34E-05    | -0.447145983 |
| cg26291600 | ALOX5                                           | 0.000148457 | -0.447172014 |
| cg02980499 | BLNK;BLNK                                       | 3.34E-05    | -0.447227211 |
| cg06458258 |                                                 | 0.000117986 | -0.4473097   |
| cg21253742 | ZNF592                                          | 3.34E-05    | -0.447398424 |
| cg01519464 | RCAN3                                           | 2.58E-05    | -0.447411914 |
| cg11615509 | SHROOM3                                         | 4.34E-05    | -0.447593617 |
| cg05134426 | ZNF608                                          | 0.000290372 | -0.447610037 |
| cg08795515 | RAB40B                                          | 5.59E-05    | -0.447859663 |
| cg19779166 |                                                 | 0.000334462 | -0.447910129 |
| cg04722215 | ARID5A                                          | 4.34E-05    | -0.448203457 |
| cg26503038 | GNG7                                            | 0.000187194 | -0.448213666 |
| cg01785706 |                                                 | 5.59E-05    | -0.448220113 |
| cg07813747 | LOC100271836                                    | 0.00043997  | -0.448434668 |
| cg10113107 | RRM1                                            | 0.000148457 | -0.448535066 |
| cg26826183 | EIF3G                                           | 3.34E-05    | -0.448654918 |
| cg18465945 | PENT;PENT;PENT                                  | 1.96E-05    | -0.449195954 |
| cg08608952 | CDC42;CDC42;CDC42                               | 9.24E-05    | -0.449285817 |
| cg16066008 | C6orf125                                        | 4.34E-05    | -0.449312486 |
| cg17843665 | MIPEP                                           | 1.50E-05    | -0.449521242 |
| cg06288355 | RAG1                                            | 5.59E-05    | -0.449551847 |
| cg05187549 |                                                 | 9.24E-05    | -0.449600419 |
| cg08654262 | DDAH1;DDAH1                                     | 0.001948248 | -0.449626242 |
| cg22762189 | MSGN1                                           | 5.59E-05    | -0.449634245 |
| cg01719433 | UCKL1AS;UCKL1                                   | 9.24E-05    | -0.449659637 |
| cg13553498 | CLEC2D;CLEC2D                                   | 0.000187194 | -0.449739406 |
| cg10227830 | GAB1;GAB1                                       | 3.34E-05    | -0.449793631 |
| cg12177944 | PLXND1                                          | 5.59E-05    | -0.450082336 |
| cg24940706 | TCF3;TCF3                                       | 1.96E-05    | -0.450138175 |

|            |                                                 |             |              |
|------------|-------------------------------------------------|-------------|--------------|
| cg08719515 | SEMA6A                                          | 0.000187194 | -0.450145232 |
| cg06804344 | GP9                                             | 5.59E-05    | -0.450357284 |
| cg14918359 |                                                 | 4.34E-05    | -0.450456338 |
| cg15997393 | MAD1L1;MAD1L1;MAD1L1                            | 0.001639597 | -0.450461806 |
| cg06282596 | SORBS1;SORBS1;SORBS1;SORBS1;SORBS1              | 0.000357885 | -0.450504241 |
| cg02095334 | COL11A2;COL11A2;COL11A2                         | 1.96E-05    | -0.450568963 |
| cg04277893 |                                                 | 0.000791389 | -0.450591842 |
| cg17031475 | GRASP                                           | 0.000148457 | -0.450614332 |
| cg05859441 | ARHGAP17;ARHGAP17                               | 0.000357885 | -0.450623227 |
| cg19024599 | SH3RF3                                          | 0.002714607 | -0.450761467 |
| cg26795340 | GPD1;C12orf62                                   | 3.34E-05    | -0.450835258 |
| cg09214551 | NMT1;DCAKD                                      | 0.000187194 | -0.450843189 |
| cg02525637 | CD81                                            | 4.34E-05    | -0.450910613 |
| cg20382047 | C6orf25;C6orf25;C6orf25;C6orf25;C6orf25;C6orf25 | 0.000791389 | -0.450956598 |
| cg08675117 | RFX2;RFX2                                       | 0.000955793 | -0.451171712 |
| cg09132058 |                                                 | 7.23E-05    | -0.451328327 |
| cg16725974 | SYNE2;SYNE2                                     | 0.000537905 | -0.451347596 |
| cg09376583 |                                                 | 0.000148457 | -0.45134804  |
| cg24727290 | DDR1;DDR1                                       | 3.34E-05    | -0.451633206 |
| cg06069407 | TMCO3                                           | 0.000233422 | -0.451714163 |
| cg16241062 |                                                 | 0.005897668 | -0.451788096 |
| cg17717972 | ARHGEF10                                        | 3.34E-05    | -0.451806887 |
| cg08570686 |                                                 | 1.96E-05    | -0.451941077 |
| cg02585724 | KIAA1199                                        | 3.34E-05    | -0.451946138 |
| cg20847766 | ARHGEF7;ARHGEF7;ARHGEF7;ARHGEF7;ARHGEF7         | 4.34E-05    | -0.451972787 |
| cg21818891 | SLC1A2                                          | 0.000187194 | -0.452024456 |
| cg18722086 | KIAA2018                                        | 9.24E-05    | -0.452322054 |
| cg13750802 | LOC646982;LOC646982;LOC646982                   | 4.34E-05    | -0.452358236 |
| cg26334358 |                                                 | 0.000117986 | -0.452533036 |
| cg02939659 |                                                 | 0.002304201 | -0.452547054 |
| cg01807748 | ABCA4                                           | 0.000537905 | -0.452642118 |
| cg10601159 | THAP4;THAP4                                     | 9.24E-05    | -0.452660766 |
| cg14316944 |                                                 | 5.59E-05    | -0.452772875 |
| cg17633015 | MAD1L1;MAD1L1;MAD1L1                            | 0.000290372 | -0.45296821  |
| cg03238899 | GALNT7                                          | 5.59E-05    | -0.453080513 |
| cg16626875 | HK2                                             | 0.000290372 | -0.453296687 |
| cg16081096 | IQSEC1;IQSEC1                                   | 2.58E-05    | -0.453542302 |
| cg20973476 |                                                 | 7.23E-05    | -0.453604257 |
| cg24949488 | DNTT;DNTT                                       | 4.34E-05    | -0.453646335 |
| cg00762029 | IRF2                                            | 0.000357885 | -0.453788414 |
| cg21711862 |                                                 | 0.000117986 | -0.453833797 |
| cg14950134 | TSSC1                                           | 7.23E-05    | -0.453947065 |
| cg26864036 |                                                 | 0.000148457 | -0.45397653  |
| cg11495377 |                                                 | 0.000148457 | -0.45402162  |
| cg23464271 | KIAA1409;COX8C                                  | 0.002304201 | -0.45440529  |
| cg06767314 | ABR                                             | 1.96E-05    | -0.454477413 |
| cg01582937 | SORBS3                                          | 4.34E-05    | -0.454502391 |
| cg03264729 | PDE2A;PDE2A;PDE2A;PDE2A                         | 0.000117986 | -0.454538117 |
| cg04911180 | TBL1XR1                                         | 7.23E-05    | -0.454731443 |
| cg21074015 | ENTPD4;ENTPD4                                   | 0.001639597 | -0.454925898 |
| cg19813135 | TNFAIP3                                         | 0.007873393 | -0.454967196 |
| cg02947214 |                                                 | 7.23E-05    | -0.454974151 |
| cg24181389 | RPTOR;RPTOR                                     | 4.34E-05    | -0.455027706 |
| cg09217856 | RGS12;RGS12;RGS12                               | 7.23E-05    | -0.45509972  |
| cg08457158 |                                                 | 7.23E-05    | -0.455212454 |
| cg19275008 | CDC42EP3                                        | 0.000148457 | -0.455264921 |
| cg05128379 |                                                 | 0.000117986 | -0.455477684 |
| cg07597976 | CD19                                            | 0.000233422 | -0.455572307 |
| cg00077838 |                                                 | 1.50E-05    | -0.455578053 |
| cg04248499 | MYO15B                                          | 2.58E-05    | -0.455753037 |



|            |                                    |             |              |
|------------|------------------------------------|-------------|--------------|
| cg21211645 | LARS2                              | 4.34E-05    | -0.455754161 |
| cg17434577 | RPTOR;RPTOR                        | 3.34E-05    | -0.455789404 |
| cg12183032 | TCF3;TCF3                          | 0.000233422 | -0.455818922 |
| cg24007886 | OBFC2B;SLC39A5                     | 0.000357885 | -0.45613507  |
| cg19365697 | TRIM26                             | 0.000148457 | -0.456184383 |
| cg04450994 | SLC22A23;SLC22A23                  | 5.11E-05    | -0.456285314 |
| cg17574471 | LETM1                              | 0.000233422 | -0.45642153  |
| cg14685006 | NCRNA00114;NCRNA00114              | 0.000187194 | -0.456484871 |
| cg00145915 |                                    | 0.000357885 | -0.456588897 |
| cg00509249 | CCDC162                            | 4.34E-05    | -0.456665992 |
| cg11435441 |                                    | 0.000290372 | -0.456711104 |
| cg07464408 |                                    | 5.59E-05    | -0.456746078 |
| cg15742700 | BLK                                | 1.11E-05    | -0.456826757 |
| cg10330187 | ZC3H18                             | 0.001376172 | -0.456918822 |
| cg11494699 | RAG1                               | 7.23E-05    | -0.457076772 |
| cg18590995 | PARP1                              | 5.59E-05    | -0.457147076 |
| cg19565738 | ZAK;ZAK                            | 0.00043997  | -0.457278464 |
| cg17397870 | TRIM39;TRIM39                      | 7.23E-05    | -0.457302194 |
| cg24244854 | GRB2;GRB2                          | 1.11E-05    | -0.457387394 |
| cg27107094 | ELFN2                              | 0.00043997  | -0.457401077 |
| cg12385032 | BCAS3;BCAS3                        | 0.002714607 | -0.457433569 |
| cg13853953 | THAP4;THAP4                        | 5.59E-05    | -0.457478485 |
| cg00259518 |                                    | 1.96E-05    | -0.457579294 |
| cg12756527 | CUGBP2;CUGBP2;CUGBP2;CUGBP2        | 4.34E-05    | -0.457756322 |
| cg01922613 | ABCA4                              | 0.000187194 | -0.457756769 |
| cg03877829 | C5orf13;C5orf13                    | 0.00043997  | -0.457818073 |
| cg13855435 | YPEL2                              | 2.58E-05    | -0.457855768 |
| cg00793937 |                                    | 7.23E-05    | -0.458602107 |
| cg18664915 | C7orf50;C7orf50;C7orf50            | 3.34E-05    | -0.458699619 |
| cg03425860 |                                    | 0.000537905 | -0.458747115 |
| cg08430680 | TCF3;TCF3                          | 3.34E-05    | -0.458776266 |
| cg08986727 | TRIO                               | 0.002714607 | -0.458863559 |
| cg12500731 |                                    | 0.000357885 | -0.458873969 |
| cg00643293 |                                    | 0.001147425 | -0.45898771  |
| cg16308790 | NFATC1;NFATC1;NFATC1;NFATC1;NFATC1 | 3.34E-05    | -0.459172769 |
| cg11329449 | SH3PXD2B                           | 0.000654035 | -0.45919634  |
| cg24893378 | PART1                              | 2.58E-05    | -0.459202412 |
| cg00001793 | ETV6                               | 3.92E-05    | -0.459275755 |
| cg09832911 | ALOX5                              | 0.000187194 | -0.459346535 |
| cg02211519 | CD81                               | 1.11E-05    | -0.459567755 |
| cg10168330 | PTK2B;PTK2B;PTK2B;PTK2B            | 2.58E-05    | -0.459662923 |
| cg02763540 | UHRF1;UHRF1                        | 7.23E-05    | -0.459668681 |
| cg21822146 | ISM2;ISM2                          | 0.000122184 | -0.460016212 |
| cg05373251 |                                    | 0.000148457 | -0.460094139 |
| cg15787636 | TBCD                               | 0.000148457 | -0.460305495 |
| cg11629955 | CHCHD6                             | 0.000187194 | -0.460461258 |
| cg05891759 | ILDR1                              | 4.34E-05    | -0.460550416 |
| cg14218435 | SLC26A9;SLC26A9;SLC26A9            | 9.24E-05    | -0.460598457 |
| cg11922066 | EBF1                               | 0.005897668 | -0.460599979 |
| cg14037250 | BRD3                               | 0.00043997  | -0.460610262 |
| cg22855764 | TANC1;TANC1                        | 5.59E-05    | -0.460678105 |
| cg04005793 | OBFC2B;SLC39A5                     | 0.00043997  | -0.460700623 |
| cg21554588 | SLC23A1;SLC23A1                    | 0.000187194 | -0.460843949 |
| cg00863309 | DTL                                | 0.000654035 | -0.461118056 |
| cg18278519 | DNMT;DNMT                          | 0.000148457 | -0.461269964 |
| cg15220055 |                                    | 0.000290372 | -0.461384235 |
| cg23017002 |                                    | 3.34E-05    | -0.461479777 |
| cg09735627 |                                    | 3.34E-05    | -0.461590462 |
| cg17634401 | APOM                               | 0.006823935 | -0.461611177 |
| cg09822812 | DDR1;DDR1;DDR1                     | 3.34E-05    | -0.461638544 |

|            |                                       |             |              |
|------------|---------------------------------------|-------------|--------------|
| cg01324963 | GPR160                                | 7.23E-05    | -0.46169011  |
| cg17980999 | PNLDC1                                | 1.96E-05    | -0.461779971 |
| cg25263238 | BLNK;BLNK                             | 2.58E-05    | -0.46204097  |
| cg23246886 | TSPAN5                                | 0.000187194 | -0.462065083 |
| cg11383802 | DHCR7;DHCR7                           | 0.001948248 | -0.462132635 |
| cg04396112 | MAD1L1;MAD1L1;MAD1L1                  | 0.000233422 | -0.462324765 |
| cg24130568 | TBCD                                  | 0.000537905 | -0.462507432 |
| cg25456728 | ARSG                                  | 5.59E-05    | -0.462669703 |
| cg14773365 | HRH2;HRH2                             | 0.000148457 | -0.462811997 |
| cg27022201 | PRKAR1B;PRKAR1B;PRKAR1B;PRKAR1B;PRK   | 3.34E-05    | -0.46283758  |
| cg20826442 |                                       | 3.34E-05    | -0.462855196 |
| cg13172153 | TNNI1                                 | 2.58E-05    | -0.462909196 |
| cg20603106 | ARHGAP24;ARHGAP24                     | 9.24E-05    | -0.462926702 |
| cg08285589 | RAG1                                  | 0.000290372 | -0.462929134 |
| cg24570346 |                                       | 9.24E-05    | -0.463019533 |
| cg07660114 | ADARB2                                | 5.59E-05    | -0.463242291 |
| cg12778178 | UCKL1AS;UCKL1                         | 9.24E-05    | -0.463243957 |
| cg23531049 | MAPKBP1;MAPKBP1                       | 3.34E-05    | -0.463260248 |
| cg10691395 |                                       | 0.000537905 | -0.46336233  |
| cg13745692 | FHIT;FHIT                             | 9.24E-05    | -0.463413704 |
| cg18797923 | AMT;AMT;AMT;NICN1;AMT;AMT             | 3.34E-05    | -0.463456059 |
| cg17078393 | LCK                                   | 1.50E-05    | -0.463550246 |
| cg24092939 | ADCY6                                 | 7.23E-05    | -0.463636152 |
| cg10466421 | JAM2                                  | 0.000357885 | -0.463643113 |
| cg12840847 | SEC14L1;SEC14L1;SEC14L1;SEC14L1;SEC14 | 2.58E-05    | -0.463722651 |
| cg20055861 | MAP2K5;MAP2K5                         | 1.96E-05    | -0.464233603 |
| cg12279968 | LOC100133612                          | 0.006823935 | -0.464291675 |
| cg27031754 |                                       | 4.34E-05    | -0.464357857 |
| cg10361659 | RNASEH2B;RNASEH2B                     | 5.59E-05    | -0.464512087 |
| cg19948549 | D4S234E;D4S234E                       | 0.000357885 | -0.464573555 |
| cg19742736 | TBC1D20                               | 9.24E-05    | -0.464760685 |
| cg19796955 | TBK1                                  | 0.001639597 | -0.464791027 |
| cg01731500 | SLC16A3;SLC16A3;SLC16A3               | 3.34E-05    | -0.464992762 |
| cg04715649 | CDC42BPB                              | 0.000148457 | -0.465119267 |
| cg09437283 | IQSEC1;IQSEC1                         | 9.24E-05    | -0.465269766 |
| cg03554394 |                                       | 0.000290372 | -0.465354224 |
| cg10443421 |                                       | 9.24E-05    | -0.465530243 |
| cg08845973 | SPG7;SPG7                             | 0.00043997  | -0.465671786 |
| cg04828493 | CARS2                                 | 0.000357885 | -0.465822021 |
| cg04406620 | CYB5B                                 | 0.000290372 | -0.465934857 |
| cg23754918 | IQCE;IQCE                             | 3.34E-05    | -0.466072574 |
| cg27562023 | RPH3AL                                | 9.24E-05    | -0.466213072 |
| cg04216051 | HDAC4                                 | 0.001376172 | -0.466277126 |
| cg18313416 | NUP210                                | 0.000148457 | -0.466296427 |
| cg00258779 |                                       | 7.23E-05    | -0.466302283 |
| cg07018090 | BANP;BANP                             | 0.000148457 | -0.466371481 |
| cg12417466 | ARPP-21                               | 0.001147425 | -0.466378835 |
| cg07517739 |                                       | 0.000233422 | -0.466385912 |
| cg13823257 |                                       | 4.34E-05    | -0.466396932 |
| cg18067520 | QRSL1                                 | 3.34E-05    | -0.466770403 |
| cg14374994 | PDCD1LG2                              | 0.001147425 | -0.466828042 |
| cg17601191 |                                       | 9.24E-05    | -0.466850913 |
| cg19215110 | DDR1;DDR1                             | 3.34E-05    | -0.466876981 |
| cg04324917 | LOC100129637                          | 2.58E-05    | -0.46694177  |
| cg22014112 | TNFAIP3                               | 0.006823935 | -0.466954066 |
| cg18184053 |                                       | 9.24E-05    | -0.466954568 |
| cg22889918 |                                       | 5.59E-05    | -0.467151139 |
| cg02574101 | LOC91450                              | 0.000148457 | -0.467217921 |
| cg01466491 |                                       | 7.23E-05    | -0.467327947 |
| cg12450872 |                                       | 0.000148457 | -0.467509673 |

|            |                                     |             |              |
|------------|-------------------------------------|-------------|--------------|
| cg11316887 | SVIL;SVIL                           | 3.34E-05    | -0.467540494 |
| cg13103051 | ST8SIA5                             | 1.96E-05    | -0.467629667 |
| cg02286857 | TTC7A                               | 7.23E-05    | -0.467649873 |
| cg26635451 |                                     | 0.000148457 | -0.467719819 |
| cg25469923 |                                     | 7.23E-05    | -0.467733021 |
| cg13466700 | NOX3;NOX3                           | 0.000357885 | -0.467803939 |
| cg17804342 | RGS10;RGS10                         | 0.000955793 | -0.467816666 |
| cg15562346 |                                     | 0.000290372 | -0.467870394 |
| cg16675872 |                                     | 0.00043997  | -0.467888829 |
| cg13915752 | CDK19                               | 0.002714607 | -0.467911897 |
| cg10351692 | POM121C                             | 0.000117986 | -0.46792426  |
| cg12147994 | SH3YL1;SH3YL1                       | 0.000187194 | -0.467950257 |
| cg08412215 |                                     | 0.0050758   | -0.468489842 |
| cg17850055 |                                     | 3.34E-05    | -0.468764969 |
| cg06380725 | TRAF3IP2;TRAF3IP2;TRAF3IP2;TRAF3IP2 | 7.23E-05    | -0.469246275 |
| cg27026786 | SPATA13;SPATA13                     | 5.59E-05    | -0.46927405  |
| cg01882471 |                                     | 0.0050758   | -0.46933477  |
| cg13544075 | LCN6                                | 9.24E-05    | -0.469447552 |
| cg26171271 |                                     | 4.34E-05    | -0.469504305 |
| cg25115537 | ZHX2                                | 7.23E-05    | -0.469719472 |
| cg15188939 | ARIH1                               | 1.11E-05    | -0.469810887 |
| cg19348272 | PION                                | 0.000117986 | -0.470023592 |
| cg24710951 | KIAA1949;NRM;KIAA1949               | 3.34E-05    | -0.470109287 |
| cg01024458 | RERE;RERE                           | 0.000187194 | -0.470396066 |
| cg23463186 | TSPAN14;TSPAN14                     | 4.34E-05    | -0.470470864 |
| cg05487001 | ARHGEF7;ARHGEF7;ARHGEF7;ARHGEF7;AR  | 4.34E-05    | -0.470574141 |
| cg26247508 | SH2D4B;SH2D4B                       | 0.000187194 | -0.470789226 |
| cg22510662 | C5orf33;C5orf33                     | 4.34E-05    | -0.470908469 |
| cg24749385 |                                     | 8.60E-06    | -0.470998642 |
| cg14029759 | FARS2                               | 2.58E-05    | -0.471000566 |
| cg20072792 | RECQL5;LOC643008;LOC643008          | 0.000290372 | -0.471077484 |
| cg00874877 | C6orf10                             | 0.000148457 | -0.471088557 |
| cg00559992 | PIK3R1                              | 0.000148457 | -0.471186879 |
| cg02451443 |                                     | 7.23E-05    | -0.471208402 |
| cg08469255 | DDR1;DDR1                           | 9.24E-05    | -0.471365511 |
| cg07194798 |                                     | 0.000187194 | -0.471405307 |
| cg14741870 | TRIM26                              | 7.23E-05    | -0.471471445 |
| cg11697194 |                                     | 1.50E-05    | -0.471507755 |
| cg14360448 |                                     | 0.000654035 | -0.47161855  |
| cg02538169 | GIGYF1                              | 9.24E-05    | -0.471780315 |
| cg24375364 | AMZ1                                | 3.34E-05    | -0.472381426 |
| cg12738008 | MYOM2                               | 0.000117986 | -0.472647904 |
| cg10715426 |                                     | 0.000187194 | -0.472759515 |
| cg18967835 | GPR18;GPR18;UBAC2;UBAC2;UBAC2       | 1.50E-05    | -0.472901557 |
| cg03801691 | VGLL4;VGLL4;VGLL4;VGLL4             | 0.003189589 | -0.472941546 |
| cg19190593 | LY86;LOC285780                      | 4.34E-05    | -0.473265593 |
| cg12627726 | KCNQ4;KCNQ4                         | 3.34E-05    | -0.473273805 |
| cg27058221 | PLA2G10                             | 0.000537905 | -0.473311006 |
| cg16660220 | AMBRA1                              | 4.34E-05    | -0.473410011 |
| cg15930643 | FLJ37543                            | 0.000357885 | -0.473588219 |
| cg10145196 | KIAA1949;KIAA1949                   | 2.58E-05    | -0.473716295 |
| cg06429138 |                                     | 0.000233422 | -0.473789346 |
| cg13911959 | ADARB2                              | 0.000290372 | -0.473828522 |
| cg11814882 | CYGB                                | 1.96E-05    | -0.474070369 |
| cg04396303 | PDE11A;PDE11A;PDE11A;PDE11A         | 0.000117986 | -0.474151538 |
| cg06323049 | CD19                                | 9.24E-05    | -0.474719547 |
| cg25599924 | ACOX3;ACOX3                         | 0.000233422 | -0.474750628 |
| cg13329862 | DDR1;DDR1                           | 3.34E-05    | -0.475397086 |
| cg07841371 | TTL10;TTL10                         | 5.59E-05    | -0.475609945 |
| cg21812313 |                                     | 2.58E-05    | -0.475643103 |

|            |                                                  |             |              |
|------------|--------------------------------------------------|-------------|--------------|
| cg02212339 | TRPV1;TRPV1;TRPV1;TRPV1                          | 0.000117986 | -0.475688323 |
| cg19477205 | MIR154                                           | 0.000148457 | -0.475801088 |
| cg13323091 |                                                  | 9.24E-05    | -0.475822135 |
| cg12400702 | CAND2;CAND2                                      | 0.000357885 | -0.475848598 |
| cg06155414 | MBNL2;MBNL2                                      | 7.23E-05    | -0.475880834 |
| cg18092363 | NFATC1;NFATC1;NFATC1;NFATC1;NFATC1               | 3.34E-05    | -0.475881834 |
| cg07836226 | RERE;RERE                                        | 0.000117986 | -0.475956047 |
| cg11257300 | MOV10;MOV10                                      | 4.34E-05    | -0.476150075 |
| cg07435215 | LOC729082                                        | 7.23E-05    | -0.476219664 |
| cg08845721 | NR3C1;NR3C1;NR3C1;NR3C1;NR3C1;NR3C1;             | 0.000537905 | -0.476283349 |
| cg17065712 | ZMIZ1                                            | 9.24E-05    | -0.476331916 |
| cg23344706 |                                                  | 0.000117986 | -0.476534502 |
| cg02615735 | LY6G5C                                           | 4.34E-05    | -0.47654373  |
| cg03347287 | DEAF1                                            | 2.58E-05    | -0.47663544  |
| cg00110171 | NFATC1;NFATC1;NFATC1;NFATC1;NFATC1               | 4.34E-05    | -0.476657497 |
| cg25099065 | ANXA4                                            | 5.59E-05    | -0.476714283 |
| cg20540372 | BLNK;BLNK                                        | 2.58E-05    | -0.476871061 |
| cg24262870 |                                                  | 0.000117986 | -0.476889844 |
| cg11018338 | CCDC109A                                         | 0.000117986 | -0.477057593 |
| cg19644145 | SP4                                              | 0.000537905 | -0.47713454  |
| cg09717923 |                                                  | 5.59E-05    | -0.477335766 |
| cg00470817 | LPAR5;LPAR5                                      | 0.000148457 | -0.47750176  |
| cg16026522 | MAD1L1;MAD1L1;MAD1L1                             | 4.34E-05    | -0.477593426 |
| cg25315312 | MAD1L1;MAD1L1;MAD1L1                             | 0.00043997  | -0.477624542 |
| cg03776082 |                                                  | 0.000117986 | -0.477628551 |
| cg00227665 | LOC100129637                                     | 4.34E-05    | -0.478042943 |
| cg12976793 |                                                  | 0.000357885 | -0.478242953 |
| cg01986619 | IQCE;IQCE                                        | 4.34E-05    | -0.478446391 |
| cg26569634 | NOL10                                            | 0.000148457 | -0.478458501 |
| cg06936246 | KCTD5                                            | 0.000187194 | -0.478627081 |
| cg26883434 | C5orf13;C5orf13;C5orf13;C5orf13;C5orf13;C5orf13; | 0.000290372 | -0.47863404  |
| cg23200357 |                                                  | 0.001376172 | -0.478856247 |
| cg02111433 | FTO                                              | 0.000148457 | -0.478981447 |
| cg01113988 |                                                  | 0.000791389 | -0.47902548  |
| cg04555379 | MAD1L1;MAD1L1;MAD1L1                             | 5.59E-05    | -0.47916358  |
| cg10147394 | BLK                                              | 7.23E-05    | -0.479199248 |
| cg16325984 | HDAC4                                            | 4.34E-05    | -0.479253589 |
| cg09481537 |                                                  | 0.000290372 | -0.479336997 |
| cg10658307 |                                                  | 3.34E-05    | -0.479425879 |
| cg16531348 | AGPAT3;AGPAT3                                    | 0.000117986 | -0.479919454 |
| cg07425109 | RPS6KA4;RPS6KA4                                  | 2.58E-05    | -0.480072996 |
| cg17461214 | CHML;OPN3                                        | 0.000117986 | -0.480458382 |
| cg27308982 | NFATC1;NFATC1;NFATC1;NFATC1;NFATC1               | 0.000187194 | -0.480790394 |
| cg05058976 | BTBD12                                           | 2.58E-05    | -0.480848332 |
| cg17342132 | NR3C1;NR3C1;NR3C1;NR3C1;NR3C1;NR3C1;             | 0.000791389 | -0.480871792 |
| cg18264210 |                                                  | 3.34E-05    | -0.480969125 |
| cg15674899 |                                                  | 0.000187194 | -0.48114947  |
| cg18098769 | DNAH17                                           | 0.000233422 | -0.48116877  |
| cg07694806 |                                                  | 7.23E-05    | -0.481338535 |
| cg22826986 | BLK                                              | 9.24E-05    | -0.481662475 |
| cg21398111 | SEC24C;SEC24C                                    | 0.000290372 | -0.481691662 |
| cg05292310 | DSPP                                             | 0.000117986 | -0.482465202 |
| cg14784253 | NOD1                                             | 1.50E-05    | -0.482593567 |
| cg03980250 |                                                  | 7.23E-05    | -0.482924643 |
| cg18050634 | BAHCC1                                           | 2.58E-05    | -0.483063608 |
| cg02052797 |                                                  | 2.58E-05    | -0.483144132 |
| cg13396060 | AKT3;AKT3                                        | 7.23E-05    | -0.483325331 |
| cg02642949 | TSPAN17;TSPAN17;TSPAN17                          | 0.000290372 | -0.48332864  |
| cg01074955 | NPHP4                                            | 0.00043997  | -0.483402277 |
| cg01562813 | NUP210                                           | 0.000187194 | -0.48370742  |

|            |                             |             |              |
|------------|-----------------------------|-------------|--------------|
| cg07396047 | LOC100129637                | 0.000117986 | -0.483820052 |
| cg14413262 | SLC45A1                     | 4.34E-05    | -0.483968031 |
| cg00582583 | CBFA2T3;CBFA2T3             | 0.000233422 | -0.484020695 |
| cg24091162 | CD79B;CD79B;CD79B           | 0.000187194 | -0.484140808 |
| cg16654610 | ZNF721                      | 0.000117986 | -0.484306448 |
| cg21656522 |                             | 1.11E-05    | -0.484563112 |
| cg24971846 | JAG2;JAG2                   | 0.000357885 | -0.484590441 |
| cg12406992 | MEX3A                       | 9.24E-05    | -0.484620005 |
| cg19610383 | DPYSL2                      | 0.000233422 | -0.484676205 |
| cg14308466 | VAV2;VAV2                   | 0.000187194 | -0.485199463 |
| cg25256141 | CUX1;CUX1;CUX1              | 0.000117986 | -0.4852803   |
| cg01093028 |                             | 0.000290372 | -0.485373463 |
| cg27060355 | SLC8A1;SLC8A1;SLC8A1;SLC8A1 | 7.23E-05    | -0.485408901 |
| cg08703857 | IQCE;IQCE                   | 3.34E-05    | -0.48544017  |
| cg13765961 | MS4A1;MS4A1                 | 1.96E-05    | -0.485646557 |
| cg05606799 | KISS1                       | 0.000290372 | -0.485674626 |
| cg02483101 |                             | 9.24E-05    | -0.485692923 |
| cg19769715 | CAMK2A;CAMK2A               | 7.23E-05    | -0.485745045 |
| cg05052463 | FBXW7;FBXW7;FBXW7;FBXW7     | 2.58E-05    | -0.485813729 |
| cg18693141 |                             | 5.59E-05    | -0.486018175 |
| cg00760938 |                             | 3.34E-05    | -0.486312635 |
| cg01094114 | ATG5                        | 4.34E-05    | -0.486334379 |
| cg14283140 | C9orf9                      | 4.34E-05    | -0.486542513 |
| cg01157650 | COL23A1                     | 0.000290372 | -0.486809389 |
| cg16564828 | MCF2L;MCF2L                 | 0.000187194 | -0.487065192 |
| cg26811425 |                             | 0.000148457 | -0.487079936 |
| cg13880868 | GLE1;GLE1                   | 9.24E-05    | -0.487092972 |
| cg17685004 |                             | 3.34E-05    | -0.487167603 |
| cg04190888 |                             | 0.000117986 | -0.487325099 |
| cg00449738 |                             | 0.000187194 | -0.487570796 |
| cg23944920 |                             | 0.00041966  | -0.48758092  |
| cg02889869 |                             | 1.11E-05    | -0.488200999 |
| cg21221540 |                             | 7.23E-05    | -0.488638633 |
| cg21765730 | NOX3                        | 0.000117986 | -0.48872335  |
| cg14535245 | TTC7A                       | 0.000290372 | -0.488849046 |
| cg02742418 | SLC15A4                     | 0.000233422 | -0.488871601 |
| cg08155625 |                             | 7.23E-05    | -0.489108075 |
| cg14482811 | LCN8                        | 4.34E-05    | -0.489109206 |
| cg08971859 | SPTBN2                      | 0.000233422 | -0.489342607 |
| cg16329842 | MAD1L1;MAD1L1;MAD1L1        | 7.23E-05    | -0.489603928 |
| cg05923736 | ECHS1                       | 0.000791389 | -0.489685068 |
| cg23093217 | FAM49A                      | 4.34E-05    | -0.490001942 |
| cg08036285 |                             | 5.59E-05    | -0.490136709 |
| cg18560936 |                             | 5.59E-05    | -0.490369716 |
| cg25140783 | RCAN3                       | 5.59E-05    | -0.490515136 |
| cg23093090 | C10orf26;C10orf26           | 0.000148457 | -0.490535447 |
| cg23322523 | TRIM55;TRIM55;TRIM55;TRIM55 | 0.000537905 | -0.4905565   |
| cg13364558 | SEMA6A                      | 0.000187194 | -0.490693713 |
| cg06895218 |                             | 0.000290372 | -0.490885556 |
| cg20452738 | ITPKB                       | 4.34E-05    | -0.491055259 |
| cg14575739 | LILRA2;LILRA2               | 3.34E-05    | -0.491084235 |
| cg19702194 | RALB                        | 0.000117986 | -0.491114492 |
| cg23842572 | MPRIP;MPRIP                 | 2.58E-05    | -0.491142149 |
| cg21606953 | NRM                         | 3.34E-05    | -0.491162522 |
| cg23001905 |                             | 0.000955793 | -0.491223755 |
| cg17913306 |                             | 0.000148457 | -0.49131044  |
| cg01160079 | PRKCA;MIR634                | 5.59E-05    | -0.491345481 |
| cg03860768 | BLK;BLK                     | 5.59E-05    | -0.491636139 |
| cg02605292 | GAS7;GAS7                   | 4.34E-05    | -0.491832781 |
| cg10498814 |                             | 0.000233422 | -0.491959898 |

|            |                                     |             |              |
|------------|-------------------------------------|-------------|--------------|
| cg10105218 | CD53;CD53                           | 4.34E-05    | -0.492228749 |
| cg11767757 | NCRNA00114                          | 2.58E-05    | -0.492327739 |
| cg24361265 | ELL3                                | 0.000148457 | -0.49237972  |
| cg21110576 |                                     | 4.34E-05    | -0.492583478 |
| cg18422371 | RAG1                                | 9.24E-05    | -0.492676381 |
| cg11390978 | SIN3B                               | 0.001639597 | -0.492773866 |
| cg22498365 | TBCD                                | 2.58E-05    | -0.492778638 |
| cg04819180 | TBCD                                | 3.34E-05    | -0.492887387 |
| cg17055207 | ACOX3;ACOX3                         | 5.59E-05    | -0.493308544 |
| cg25683989 | HVCN1;HVCN1                         | 0.000148457 | -0.493317847 |
| cg24794322 | PTPRN2;PTPRN2;PTPRN2                | 2.58E-05    | -0.49357847  |
| cg03689092 | LIMS2;LIMS2                         | 5.59E-05    | -0.493690633 |
| cg13577149 | C5orf20                             | 3.34E-05    | -0.49376285  |
| cg18612040 | RPTOR;RPTOR                         | 2.58E-05    | -0.494404418 |
| cg10443971 | NR1H3;NR1H3;NR1H3                   | 7.23E-05    | -0.494662905 |
| cg07554408 |                                     | 0.000148457 | -0.494835307 |
| cg14480046 |                                     | 9.24E-05    | -0.494894635 |
| cg03880987 | CYTH3                               | 5.59E-05    | -0.495538761 |
| cg11572080 | TRAF3IP2;TRAF3IP2;TRAF3IP2          | 0.000187194 | -0.495600126 |
| cg08783514 |                                     | 3.34E-05    | -0.49561381  |
| cg00340349 | CDK9                                | 4.34E-05    | -0.495752852 |
| cg07993367 | ATP6V0E2;LOC401431;ATP6V0E2         | 4.34E-05    | -0.495772862 |
| cg27527642 | NRM                                 | 3.34E-05    | -0.495785165 |
| cg00270654 | LOC100129637                        | 0.000148457 | -0.495872018 |
| cg21027282 | RAD51L1;RAD51L1;RAD51L1             | 0.000654035 | -0.495997669 |
| cg21239227 | MYT1L                               | 3.34E-05    | -0.496145076 |
| cg25393284 |                                     | 0.000290372 | -0.496205143 |
| cg06372779 | OSBPL3;OSBPL3;OSBPL3;OSBPL3         | 7.23E-05    | -0.496835046 |
| cg08880524 |                                     | 0.000117986 | -0.496845895 |
| cg27565966 | CD19                                | 0.000117986 | -0.497160775 |
| cg00644351 | RGS10;RGS10                         | 0.001147425 | -0.497173135 |
| cg17983657 |                                     | 5.59E-05    | -0.497218109 |
| cg12427162 | SFT2D2                              | 7.23E-05    | -0.497339752 |
| cg19219423 | PRKG1                               | 0.000117986 | -0.497570755 |
| cg21570493 |                                     | 0.000187194 | -0.497611628 |
| cg22281206 | INPP5J                              | 1.96E-05    | -0.498388718 |
| cg22301418 | ATP11A;ATP11A                       | 9.24E-05    | -0.498428826 |
| cg09948419 | MYO1G                               | 8.60E-06    | -0.498487734 |
| cg01552275 |                                     | 0.001948248 | -0.498497806 |
| cg15939287 | NRXN2;NRXN2;NRXN2                   | 0.000148457 | -0.498620611 |
| cg04346861 | HDAC4                               | 4.34E-05    | -0.498663333 |
| cg12958813 | ATP6V1G3;ATP6V1G3                   | 0.000233422 | -0.498841855 |
| cg20539175 | TMCO3                               | 0.000187194 | -0.49884858  |
| cg05484949 |                                     | 7.23E-05    | -0.498881077 |
| cg01637125 |                                     | 5.59E-05    | -0.499045595 |
| cg05279137 | AP2A2                               | 0.000357885 | -0.499184991 |
| cg11972721 | MED9                                | 2.58E-05    | -0.499327776 |
| cg03678039 | CYGB                                | 0.000187194 | -0.499379544 |
| cg14522718 | SLC25A25;SLC25A25;SLC25A25;SLC25A25 | 0.000290372 | -0.499874143 |
| cg15357156 |                                     | 0.000357885 | -0.499914392 |
| cg14764357 | C7orf50;C7orf50;C7orf50             | 0.004357816 | -0.500396381 |
| cg02061967 | C2orf48                             | 4.34E-05    | -0.500564874 |
| cg03475687 | TBCD                                | 0.000187194 | -0.500635932 |
| cg00179026 |                                     | 4.34E-05    | -0.50082234  |
| cg04898039 | MAD1L1;MAD1L1;MAD1L1                | 4.34E-05    | -0.501049822 |
| cg17894779 | FHIT;FHIT                           | 5.59E-05    | -0.501050055 |
| cg07467861 | TUBB                                | 9.24E-05    | -0.501177492 |
| cg14579184 | TBCD                                | 4.34E-05    | -0.501387034 |
| cg07710833 |                                     | 0.000290372 | -0.501561188 |
| cg18749990 |                                     | 0.000187194 | -0.50174065  |

|            |                                    |             |              |
|------------|------------------------------------|-------------|--------------|
| cg14907310 |                                    | 0.000187194 | -0.501896441 |
| cg26845390 |                                    | 0.000537905 | -0.502483787 |
| cg06008531 |                                    | 0.00043997  | -0.502773078 |
| cg02047211 | RPTOR;RPTOR                        | 4.34E-05    | -0.502833378 |
| cg11758283 |                                    | 2.58E-05    | -0.50325775  |
| cg10219816 | PLCH2                              | 9.24E-05    | -0.503627746 |
| cg18808929 |                                    | 3.34E-05    | -0.503820885 |
| cg18831134 | ABR                                | 1.96E-05    | -0.503959285 |
| cg16100486 | RPS6KA2                            | 4.34E-05    | -0.503976945 |
| cg19045002 | BAHCC1                             | 0.003189589 | -0.50410173  |
| cg11160673 | BBX;BBX                            | 1.96E-05    | -0.504459591 |
| cg07076751 | KIAA1949;KIAA1949                  | 4.34E-05    | -0.504656489 |
| cg25131632 |                                    | 0.002714607 | -0.504786701 |
| cg27618318 | TPM1;TPM1;TPM1;TPM1;TPM1;TPM1;TPM1 | 0.000148457 | -0.504915704 |
| cg05579731 | FADS3                              | 9.24E-05    | -0.504931954 |
| cg12499316 |                                    | 1.96E-05    | -0.505690412 |
| cg03699749 | OSBPL2;OSBPL2                      | 0.001147425 | -0.50601835  |
| cg08763351 | SPRR4                              | 4.34E-05    | -0.50636301  |
| cg17634650 |                                    | 3.34E-05    | -0.506504221 |
| cg21679402 | THAP4                              | 5.59E-05    | -0.506529538 |
| cg26330304 | ZNF710                             | 7.23E-05    | -0.506719955 |
| cg20405697 | NRM                                | 2.58E-05    | -0.506728028 |
| cg04747693 |                                    | 9.24E-05    | -0.507087876 |
| cg00867406 | TUBB3                              | 0.000148457 | -0.508056388 |
| cg01320579 | SEPT9;SEPT9;SEPT9;SEPT9;SEPT9      | 1.50E-05    | -0.508492389 |
| cg00162673 | RNF11                              | 0.000122184 | -0.508674294 |
| cg11472422 | B3GNTL1                            | 0.000117986 | -0.508715439 |
| cg16055052 | NRM                                | 2.58E-05    | -0.508742631 |
| cg00739471 | ACTN1;ACTN1;ACTN1                  | 2.08E-05    | -0.508913389 |
| cg21997986 | BANK1;BANK1;BANK1                  | 3.34E-05    | -0.509257969 |
| cg00294538 |                                    | 5.59E-05    | -0.509556428 |
| cg16596052 | RGS10;RGS10                        | 0.00043997  | -0.509613984 |
| cg20110257 | NRM                                | 0.000117986 | -0.509764068 |
| cg07083043 | RASD1                              | 3.34E-05    | -0.50988611  |
| cg03804400 | SLC9A9                             | 0.000117986 | -0.509991925 |
| cg00709979 |                                    | 4.34E-05    | -0.510169121 |
| cg21531416 | DEAF1                              | 0.000117986 | -0.510362882 |
| cg13777984 | ENOX1;ENOX1                        | 0.000148457 | -0.510422931 |
| cg22432760 | TBCD                               | 0.000955793 | -0.510443956 |
| cg08373904 | HCCA2                              | 5.59E-05    | -0.510497253 |
| cg06471487 | HMHB1                              | 0.000148457 | -0.510548094 |
| cg24777505 | TBCD                               | 4.34E-05    | -0.510974188 |
| cg24517978 | ZDHHC19                            | 4.34E-05    | -0.511137468 |
| cg16706613 |                                    | 7.23E-05    | -0.511269091 |
| cg18250453 | TERF1;TERF1                        | 0.000290372 | -0.511455445 |
| cg26160564 | LOC100133612                       | 3.34E-05    | -0.511519802 |
| cg16531664 | TRAPPC9;TRAPPC9                    | 0.000290372 | -0.512281325 |
| cg05760765 |                                    | 9.24E-05    | -0.512535276 |
| cg05119467 | GNB1                               | 5.59E-05    | -0.512732719 |
| cg10145533 |                                    | 4.34E-05    | -0.512744703 |
| cg10274108 | TBC1D1                             | 9.24E-05    | -0.513065453 |
| cg10402321 | UBXN11;UBXN11;UBXN11               | 0.001948248 | -0.513073794 |
| cg01105418 | ZNF238;ZNF238                      | 7.23E-05    | -0.513112001 |
| cg15696968 | KIAA1949;NRM;KIAA1949              | 4.34E-05    | -0.513188628 |
| cg23948703 | EFTUD2;EFTUD2                      | 3.34E-05    | -0.513361725 |
| cg05070250 | C11orf74;RAG2                      | 0.000233422 | -0.513820097 |
| cg22381248 | HIVEP3;HIVEP3                      | 3.34E-05    | -0.513894856 |
| cg16660971 | RPTOR;RPTOR                        | 0.000233422 | -0.513901425 |
| cg06555661 | SFRS8                              | 7.23E-05    | -0.514576211 |
| cg21156386 | DEAF1                              | 0.000290372 | -0.514828925 |

|            |                                        |             |              |
|------------|----------------------------------------|-------------|--------------|
| cg06495310 | APOM                                   | 0.003734675 | -0.515114377 |
| cg03504039 | LRRFIP1                                | 7.23E-05    | -0.515247867 |
| cg16165258 | OSBPL8;OSBPL8                          | 7.23E-05    | -0.515345349 |
| cg22212560 | FRMD8                                  | 7.23E-05    | -0.515434603 |
| cg09469986 |                                        | 3.34E-05    | -0.51553762  |
| cg24163263 |                                        | 9.24E-05    | -0.51559264  |
| cg16625671 |                                        | 0.000187194 | -0.51565968  |
| cg14299931 | ARHGEF7;ARHGEF7;ARHGEF7;ARHGEF7;AR     | 0.000290372 | -0.515986043 |
| cg01591579 | INPP5D;INPP5D                          | 2.58E-05    | -0.516014153 |
| cg20800391 | NRM;KIAA1949                           | 2.58E-05    | -0.516130509 |
| cg11704201 |                                        | 7.23E-05    | -0.516151989 |
| cg08499840 | CCL11                                  | 2.58E-05    | -0.516432487 |
| cg11798406 | NCRNA00114                             | 7.23E-05    | -0.516791873 |
| cg02386957 | ARHGEF7;ARHGEF7;ARHGEF7;ARHGEF7;AR     | 0.000187194 | -0.516876698 |
| cg27253454 | USP43                                  | 2.58E-05    | -0.516899907 |
| cg15823954 | HMHB1                                  | 5.59E-05    | -0.516977063 |
| cg23722274 | DNTT;DNTT                              | 0.000187194 | -0.51711423  |
| cg09511477 | PILRB;PILRB;PILRB                      | 7.23E-05    | -0.517474607 |
| cg10645314 | ALLC                                   | 0.000117986 | -0.518009151 |
| cg13283094 |                                        | 3.34E-05    | -0.518410831 |
| cg03448915 | TK2                                    | 7.23E-05    | -0.518499469 |
| cg01458510 | SH3RF3                                 | 7.23E-05    | -0.518746125 |
| cg01744412 |                                        | 0.000148457 | -0.518790085 |
| cg18641463 | MAD1L1;MAD1L1;MAD1L1                   | 0.000357885 | -0.518795407 |
| cg19187110 |                                        | 0.000148457 | -0.519082739 |
| cg11661493 | UBE2O                                  | 5.59E-05    | -0.519421858 |
| cg16580765 | PRKD2;PRKD2;PRKD2;PRKD2                | 9.24E-05    | -0.519523571 |
| cg08057432 | ANKRD11                                | 0.000148457 | -0.520090842 |
| cg22256853 | GCET2;GCET2                            | 4.34E-05    | -0.520502408 |
| cg26514793 | CHST3                                  | 4.34E-05    | -0.520509944 |
| cg10824972 |                                        | 7.23E-05    | -0.520639455 |
| cg12604490 | FBXL4                                  | 0.000117986 | -0.520786332 |
| cg13356455 | ATP10A                                 | 7.23E-05    | -0.520844987 |
| cg03980424 |                                        | 7.23E-05    | -0.521225387 |
| cg27377289 |                                        | 4.34E-05    | -0.521543279 |
| cg14279856 | DDR1;DDR1                              | 1.96E-05    | -0.521750691 |
| cg02696067 | DDR1;DDR1                              | 2.58E-05    | -0.521958416 |
| cg22621310 | MAD1L1;MAD1L1;MAD1L1                   | 0.000187194 | -0.522182924 |
| cg05204566 | MAP1D                                  | 9.24E-05    | -0.522195355 |
| cg17930505 | GALNT2                                 | 1.50E-05    | -0.523047215 |
| cg26089007 |                                        | 4.34E-05    | -0.523062997 |
| cg10471113 | IFT140;TMEM204                         | 0.00043997  | -0.523249412 |
| cg27183818 |                                        | 2.58E-05    | -0.524524328 |
| cg08444833 | EIF2C2;EIF2C2                          | 4.34E-05    | -0.524847245 |
| cg17811857 |                                        | 0.000357885 | -0.525162206 |
| cg06146665 | USP36                                  | 4.34E-05    | -0.525686948 |
| cg19627093 | ARHGEF10                               | 1.50E-05    | -0.525935966 |
| cg19766988 | EIF3G                                  | 4.34E-05    | -0.52738663  |
| cg17812123 |                                        | 5.59E-05    | -0.527440556 |
| cg20743720 | HIVEP2                                 | 3.34E-05    | -0.527466568 |
| cg17158584 | CTBP1;CTBP1                            | 9.24E-05    | -0.527578123 |
| cg15730481 | GPER;C7orf50;C7orf50;GPER;C7orf50;GPER | 1.96E-05    | -0.527954109 |
| cg16219283 | LTA;LTA;LTA                            | 0.000117986 | -0.528771081 |
| cg06934654 | ACSF3;ACSF3;ACSF3                      | 5.59E-05    | -0.529016572 |
| cg26740109 |                                        | 2.58E-05    | -0.529309564 |
| cg14293575 | USP18                                  | 1.96E-05    | -0.530388011 |
| cg18554866 | C11orf74                               | 5.59E-05    | -0.530401343 |
| cg21596498 | POU2F2                                 | 1.50E-05    | -0.531170344 |
| cg03742250 |                                        | 9.24E-05    | -0.531279795 |
| cg14936008 |                                        | 9.24E-05    | -0.5318446   |



|            |                                       |             |              |
|------------|---------------------------------------|-------------|--------------|
| cg23535322 |                                       | 0.000158823 | -0.53239878  |
| cg00128100 | KIAA1949;NRM;KIAA1949                 | 5.59E-05    | -0.532401549 |
| cg22612590 | TMCO3                                 | 7.23E-05    | -0.532852996 |
| cg21999229 | LTA;LTA;LTA                           | 0.000233422 | -0.533632292 |
| cg22734058 | LRRFIP1                               | 9.04E-05    | -0.533789255 |
| cg05814100 | RPTOR;RPTOR                           | 7.23E-05    | -0.534045449 |
| cg08619712 |                                       | 1.50E-05    | -0.534092416 |
| cg08556541 | SPTBN1;SPTBN1                         | 0.000117986 | -0.534614657 |
| cg03917666 |                                       | 4.34E-05    | -0.534804059 |
| cg07142068 | PFKFB3;PFKFB3                         | 0.000205664 | -0.536763043 |
| cg22905350 | NEK10                                 | 7.23E-05    | -0.537408644 |
| cg26348614 | IQGAP2                                | 5.59E-05    | -0.538177024 |
| cg09755397 |                                       | 4.34E-05    | -0.538314605 |
| cg16411445 | NCRNA00114                            | 0.00041966  | -0.539113308 |
| cg25020969 | MAD1L1;MAD1L1;MAD1L1                  | 9.24E-05    | -0.539138089 |
| cg05205074 |                                       | 0.000148457 | -0.539222414 |
| cg13429555 |                                       | 7.23E-05    | -0.53960489  |
| cg26337914 | PTPRN2;PTPRN2;PTPRN2                  | 2.58E-05    | -0.540114651 |
| cg17800669 | BAALC;BAALC                           | 0.000233422 | -0.54026542  |
| cg20071744 | TRAPPC9;TRAPPC9                       | 0.00043997  | -0.540510172 |
| cg15198193 | KIAA1614                              | 5.59E-05    | -0.540534178 |
| cg05909702 |                                       | 0.000187194 | -0.540558183 |
| cg21585707 | FBXL18                                | 3.34E-05    | -0.54137578  |
| cg20122488 | MED9                                  | 3.34E-05    | -0.541813088 |
| cg03922146 | KIAA1949;NRM;KIAA1949                 | 3.34E-05    | -0.541813905 |
| cg10249814 | MSI2;MSI2                             | 9.24E-05    | -0.542036025 |
| cg12822816 | INPP5A                                | 7.23E-05    | -0.542392852 |
| cg23375948 | MAD1L1;MAD1L1;MAD1L1                  | 7.23E-05    | -0.543000032 |
| cg21786786 | ATP11A;ATP11A                         | 9.24E-05    | -0.543830407 |
| cg10987840 |                                       | 4.34E-05    | -0.545335819 |
| cg23424988 |                                       | 2.58E-05    | -0.545569322 |
| cg07665575 | RAG1                                  | 0.000117986 | -0.545603073 |
| cg04947949 | WDFY4                                 | 0.000187194 | -0.547091866 |
| cg11348106 | SEC14L1;SEC14L1;SEC14L1;SEC14L1;SEC14 | 1.11E-05    | -0.547533378 |
| cg22633936 | SH2D4B;SH2D4B;SH2D4B                  | 0.000148457 | -0.547912257 |
| cg17995557 | LHPP;LHPP                             | 3.34E-05    | -0.549278924 |
| cg03930857 | DNTT;DNTT                             | 0.000187194 | -0.551105158 |
| cg10374402 | SH2D4B;SH2D4B;SH2D4B                  | 0.000117986 | -0.551786677 |
| cg23324787 | C11orf74;RAG2;RAG2                    | 4.34E-05    | -0.551891911 |
| cg26214026 | ATXN2                                 | 0.000148457 | -0.55194786  |
| cg27157038 | DNTT;DNTT                             | 0.000148457 | -0.553334672 |
| cg10667102 |                                       | 0.000148457 | -0.553640054 |
| cg24035107 | METT10D                               | 4.34E-05    | -0.554545078 |
| cg08822897 |                                       | 1.96E-05    | -0.554584366 |
| cg06687504 | RPS6KA2                               | 4.34E-05    | -0.555250468 |
| cg07721872 | LOC100129637                          | 5.59E-05    | -0.556199755 |
| cg13299324 | NCRNA00114                            | 0.000148457 | -0.557796011 |
| cg18758433 | RPTOR;RPTOR                           | 1.96E-05    | -0.559066172 |
| cg06154633 | RPTOR;RPTOR                           | 7.23E-05    | -0.559472979 |
| cg16755833 | TBCD                                  | 0.000148457 | -0.559709335 |
| cg14060402 | ZCCHC7                                | 0.000148457 | -0.559788361 |
| cg21820873 | RPS6KA4;RPS6KA4                       | 0.000117986 | -0.560411447 |
| cg25373630 | BCL2                                  | 3.34E-05    | -0.560759344 |
| cg01012295 | MYOM2                                 | 7.23E-05    | -0.562816449 |
| cg21507958 | RPTOR;RPTOR                           | 7.23E-05    | -0.562996238 |
| cg01598421 | TG                                    | 7.23E-05    | -0.563000673 |
| cg18790741 | NUP210                                | 5.59E-05    | -0.563293791 |
| cg14182254 | SFRS4                                 | 5.59E-05    | -0.565756886 |
| cg24667756 | RPTOR;RPTOR                           | 9.24E-05    | -0.565935778 |
| cg21885159 | GNG7                                  | 4.34E-05    | -0.568364926 |

|            |                                              |             |              |
|------------|----------------------------------------------|-------------|--------------|
| cg27106643 | NFATC1;NFATC1;NFATC1;NFATC1                  | 1.96E-05    | -0.568401175 |
| cg26092233 |                                              | 2.58E-05    | -0.570128819 |
| cg23730277 | BANK1;BANK1;BANK1                            | 4.34E-05    | -0.570879066 |
| cg00861669 | GALNT7                                       | 5.59E-05    | -0.57359218  |
| cg05776861 | ARHGEF7;ARHGEF7;ARHGEF7;ARHGEF7;AR           | 4.34E-05    | -0.57542523  |
| cg06091647 | RPTOR;RPTOR                                  | 2.58E-05    | -0.576368555 |
| cg19755815 | TBCD                                         | 1.96E-05    | -0.577610081 |
| cg20311673 | PXDN                                         | 7.23E-05    | -0.580443578 |
| cg20572915 | C18orf1;C18orf1;C18orf1;C18orf1;C18orf1;C18o | 2.58E-05    | -0.580623172 |
| cg26994885 | CSRP2                                        | 7.23E-05    | -0.58833587  |
| cg07558704 | SFXN5                                        | 0.000117986 | -0.594780905 |
| cg25588389 |                                              | 0.000148457 | -0.595773371 |
| cg19038462 | ZEB1;ZEB1;ZEB1;ZEB1;ZEB1                     | 2.58E-05    | -0.60043753  |
| cg17152850 | PDE11A;PDE11A;PDE11A;PDE11A                  | 5.59E-05    | -0.60272097  |
| cg07698804 | TBCD                                         | 4.34E-05    | -0.603601477 |
| cg13241681 | TMCO3                                        | 7.23E-05    | -0.604081709 |
| cg23474890 | BCL7A;BCL7A                                  | 5.11E-05    | -0.604157459 |
| cg02243479 | RPTOR;RPTOR                                  | 3.34E-05    | -0.606111328 |
| cg18675847 | AFF1                                         | 4.34E-05    | -0.607717294 |
| cg23948811 |                                              | 2.58E-05    | -0.609710677 |
| cg25154959 | RAG1                                         | 5.59E-05    | -0.611653875 |
| cg00225902 | LRIG1                                        | 7.23E-05    | -0.613813884 |
| cg09969462 | TBCD                                         | 1.50E-05    | -0.618452812 |
| cg02092514 | TBCD                                         | 1.96E-05    | -0.633820089 |
| cg12583572 | MAD1L1;MAD1L1;MAD1L1                         | 4.34E-05    | -0.649648641 |
| cg12602405 |                                              | 4.34E-05    | -0.660027414 |

**Supplementary table 3:** Gene ontology analysis of hypomethylated gene promoters in group ALL-2.

| Gene ontology term                                         | Fold Enrichment | Bonferroni | Benjamini | FDR     | Fisher Exact |
|------------------------------------------------------------|-----------------|------------|-----------|---------|--------------|
| system development                                         | 1,7             | 1,2E-43    | 1,2E-43   | 1,9E-43 | 6,1E-47      |
| cell-cell adhesion                                         | 2,9             | 1,1E-23    | 5,3E-24   | 1,7E-23 | 2,6E-27      |
| organ development                                          | 1,6             | 1,7E-22    | 4,2E-23   | 2,7E-22 | 9,5E-26      |
| anatomical structure morphogenesis                         | 1,8             | 1,5E-22    | 5,1E-23   | 2,5E-22 | 7,6E-26      |
| cell differentiation                                       | 1,6             | 8,0E-22    | 1,6E-22   | 1,3E-21 | 4,5E-25      |
| cell-cell signaling                                        | 2,1             | 2,5E-20    | 4,1E-21   | 4,0E-20 | 9,8E-24      |
| cell development                                           | 2,0             | 7,7E-19    | 1,1E-19   | 1,2E-18 | 3,3E-22      |
| cell fate commitment                                       | 3,3             | 3,4E-15    | 4,3E-16   | 5,5E-15 | 7,0E-19      |
| pattern specification process                              | 2,5             | 5,6E-15    | 6,2E-16   | 9,0E-15 | 1,7E-18      |
| organ morphogenesis                                        | 2,0             | 2,2E-13    | 2,2E-14   | 3,6E-13 | 4,0E-17      |
| embryonic development                                      | 1,9             | 3,3E-13    | 3,0E-14   | 5,2E-13 | 1,9E-16      |
| embryonic morphogenesis                                    | 2,3             | 5,4E-13    | 4,5E-14   | 8,8E-13 | 2,4E-16      |
| tube development                                           | 2,5             | 7,8E-12    | 6,0E-13   | 1,3E-11 | 2,4E-15      |
| embryonic organ development                                | 2,8             | 8,9E-12    | 6,4E-13   | 1,4E-11 | 2,3E-15      |
| regionalization                                            | 2,6             | 2,3E-11    | 1,5E-12   | 3,7E-11 | 6,8E-15      |
| neuron projection development                              | 2,3             | 5,7E-10    | 3,6E-11   | 9,2E-10 | 2,0E-13      |
| regulation of system process                               | 2,2             | 1,3E-9     | 7,6E-11   | 2,1E-9  | 5,0E-13      |
| tissue development                                         | 1,7             | 1,4E-9     | 7,6E-11   | 2,2E-9  | 7,3E-13      |
| embryonic development ending in birth or egg hatching      | 2,1             | 3,2E-9     | 1,7E-10   | 5,2E-9  | 1,3E-12      |
| feeding behavior                                           | 3,7             | 4,4E-9     | 2,2E-10   | 7,1E-9  | 7,3E-13      |
| regulation of multicellular organismal process             | 1,6             | 1,3E-8     | 6,3E-10   | 2,1E-8  | 8,0E-12      |
| cell projection morphogenesis                              | 2,2             | 3,0E-8     | 1,3E-9    | 4,8E-8  | 1,1E-11      |
| cell part morphogenesis                                    | 2,2             | 1,0E-7     | 4,4E-9    | 1,6E-7  | 3,9E-11      |
| cell fate specification                                    | 4,0             | 1,4E-7     | 5,7E-9    | 2,2E-7  | 2,0E-11      |
| multicellular organismal response to stress                | 4,4             | 2,7E-7     | 1,1E-8    | 4,4E-7  | 3,2E-11      |
| positive regulation of cellular process                    | 1,4             | 4,5E-7     | 1,7E-8    | 7,3E-7  | 3,2E-10      |
| positive regulation of biological process                  | 1,3             | 7,3E-7     | 2,7E-8    | 1,2E-6  | 5,1E-10      |
| forebrain development                                      | 2,5             | 1,4E-6     | 5,1E-8    | 2,3E-6  | 4,6E-10      |
| regulation of nervous system development                   | 2,3             | 2,2E-6     | 7,4E-8    | 3,6E-6  | 8,1E-10      |
| positive regulation of neurological system process         | 4,2             | 2,2E-6     | 7,6E-8    | 3,6E-6  | 2,8E-10      |
| positive regulation of biosynthetic process                | 1,6             | 4,3E-6     | 1,4E-7    | 6,9E-6  | 2,6E-9       |
| cell morphogenesis                                         | 1,8             | 8,5E-6     | 2,7E-7    | 1,4E-5  | 4,2E-9       |
| tube morphogenesis                                         | 2,5             | 9,0E-6     | 2,7E-7    | 1,4E-5  | 2,8E-9       |
| cell migration                                             | 2,0             | 9,5E-6     | 2,8E-7    | 1,5E-5  | 4,1E-9       |
| cell motion                                                | 1,7             | 1,0E-5     | 2,9E-7    | 1,7E-5  | 5,6E-9       |
| positive regulation of nitrogen compound metabolic process | 1,6             | 1,0E-5     | 2,9E-7    | 1,6E-5  | 6,0E-9       |
| spinal cord development                                    | 4,0             | 1,6E-5     | 4,4E-7    | 2,6E-5  | 2,3E-9       |

|                                                          |     |        |        |        |        |
|----------------------------------------------------------|-----|--------|--------|--------|--------|
| appendage development                                    | 2,7 | 2,0E-5 | 5,3E-7 | 3,2E-5 | 5,7E-9 |
| cellular component morphogenesis                         | 1,8 | 2,4E-5 | 6,2E-7 | 3,9E-5 | 1,3E-8 |
| Calcium signaling pathway                                | 2,3 | 2,2E-6 | 1,1E-6 | 1,5E-5 | 4,4E-9 |
| adult behavior                                           | 2,8 | 8,5E-5 | 2,1E-6 | 1,4E-4 | 2,3E-8 |
| cell motility                                            | 1,8 | 9,3E-5 | 2,3E-6 | 1,5E-4 | 4,4E-8 |
| positive regulation of metabolic process                 | 1,5 | 1,0E-4 | 2,5E-6 | 1,7E-4 | 7,1E-8 |
| positive regulation of cellular metabolic process        | 1,5 | 1,3E-4 | 3,0E-6 | 2,1E-4 | 8,8E-8 |
| positive regulation of macromolecule metabolic process   | 1,5 | 1,5E-4 | 3,5E-6 | 2,5E-4 | 1,0E-7 |
| regulation of developmental process                      | 1,5 | 1,8E-4 | 4,0E-6 | 2,9E-4 | 1,1E-7 |
| axon guidance                                            | 2,5 | 2,1E-4 | 4,5E-6 | 3,3E-4 | 6,4E-8 |
| response to hormone stimulus                             | 1,7 | 3,4E-4 | 7,2E-6 | 5,4E-4 | 1,8E-7 |
| locomotory behavior                                      | 1,9 | 4,3E-4 | 9,0E-6 | 6,9E-4 | 2,0E-7 |
| neurotransmitter transport                               | 2,7 | 4,7E-4 | 9,6E-6 | 7,6E-4 | 1,3E-7 |
| learning or memory                                       | 2,4 | 5,6E-4 | 1,1E-5 | 9,0E-4 | 1,8E-7 |
| positive regulation of multicellular organismal process  | 1,9 | 6,3E-4 | 1,2E-5 | 1,0E-3 | 2,9E-7 |
| appendage morphogenesis                                  | 2,5 | 9,1E-4 | 1,8E-5 | 1,5E-3 | 2,9E-7 |
| regulation of localization                               | 1,5 | 1,2E-3 | 2,3E-5 | 2,0E-3 | 7,7E-7 |
| ion transport                                            | 1,4 | 1,6E-3 | 2,8E-5 | 2,5E-3 | 1,1E-6 |
| secretion                                                | 1,8 | 1,5E-3 | 2,8E-5 | 2,5E-3 | 7,7E-7 |
| morphogenesis of a branching structure                   | 2,7 | 1,6E-3 | 2,8E-5 | 2,6E-3 | 4,4E-7 |
| circulatory system process                               | 2,0 | 1,6E-3 | 2,9E-5 | 2,5E-3 | 6,7E-7 |
| regulation of biosynthetic process                       | 1,2 | 2,1E-3 | 3,6E-5 | 3,4E-3 | 1,7E-6 |
| adult locomotory behavior                                | 3,0 | 2,5E-3 | 4,2E-5 | 4,0E-3 | 5,7E-7 |
| anatomical structure formation involved in morphogenesis | 1,7 | 3,3E-3 | 5,5E-5 | 5,3E-3 | 1,8E-6 |
| regulation of transport                                  | 1,6 | 3,6E-3 | 6,0E-5 | 5,9E-3 | 2,2E-6 |
| hindbrain development                                    | 2,9 | 4,5E-3 | 7,3E-5 | 7,3E-3 | 1,2E-6 |
| synapse organization                                     | 2,8 | 6,1E-3 | 9,8E-5 | 9,9E-3 | 1,6E-6 |
| fear response                                            | 4,7 | 6,3E-3 | 9,8E-5 | 1,0E-2 | 6,5E-7 |
| regulation of nitrogen compound metabolic process        | 1,2 | 6,4E-3 | 9,9E-5 | 1,0E-2 | 5,1E-6 |
| startle response                                         | 5,1 | 6,5E-3 | 9,9E-5 | 1,1E-2 | 5,5E-7 |
| secretion by cell                                        | 1,9 | 7,9E-3 | 1,2E-4 | 1,3E-2 | 3,7E-6 |
| regulation of cell differentiation                       | 1,5 | 8,5E-3 | 1,2E-4 | 1,4E-2 | 5,3E-6 |
| cellular chemical homeostasis                            | 1,6 | 1,0E-2 | 1,5E-4 | 1,6E-2 | 5,9E-6 |
| regulation of hormone levels                             | 2,0 | 1,2E-2 | 1,7E-4 | 1,9E-2 | 5,0E-6 |
| positive regulation of developmental process             | 1,7 | 1,3E-2 | 1,9E-4 | 2,2E-2 | 7,1E-6 |
| tissue morphogenesis                                     | 1,9 | 1,8E-2 | 2,5E-4 | 2,9E-2 | 8,1E-6 |
| negative regulation of biological process                | 1,2 | 1,8E-2 | 2,5E-4 | 2,9E-2 | 1,5E-5 |
| inner ear morphogenesis                                  | 2,8 | 1,9E-2 | 2,6E-4 | 3,1E-2 | 5,0E-6 |
| response to organic substance                            | 1,4 | 2,0E-2 | 2,7E-4 | 3,3E-2 | 1,4E-5 |

**Supplementary table 4:** Gene ontology analysis of hypermethylated gene promoters in group ALL-2.

| <b>Gene ontology term</b>                 | <b>Fold Enrichment</b> | <b>Bonferroni</b> | <b>Benjamini</b> | <b>FDR</b> | <b>Fisher Exact</b> |
|-------------------------------------------|------------------------|-------------------|------------------|------------|---------------------|
| B cell activation                         | 6,5                    | 2,3E-5            | 2,3E-5           | 2,8E-5     | 2,2E-9              |
| leukocyte differentiation                 | 4,2                    | 1,5E-3            | 5,1E-4           | 1,9E-3     | 2,4E-7              |
| regulation of signal transduction         | 2,0                    | 2,4E-3            | 6,1E-4           | 3,0E-3     | 8,8E-7              |
| lymphocyte differentiation                | 4,8                    | 1,5E-3            | 7,5E-4           | 1,8E-3     | 2,0E-7              |
| hemopoietic or lymphoid organ development | 2,8                    | 1,8E-2            | 3,6E-3           | 2,2E-2     | 4,4E-6              |
| B cell differentiation                    | 6,4                    | 2,7E-2            | 4,5E-3           | 3,3E-2     | 2,6E-6              |
